# Supplementary material
Source: Research Square preprint supplement (doi:10.21203/rs.3.rs-9685636/v1)
Supplement: Supplementary file 1 [file 2df84a7fbdb17bcba073f570.xlsx]

## Sheet: all genes
GeneID	logFC	AveExpr	t	P.Value	adj.P.Val	B
Kctd14	-1.74417	3.46652	-10.8849	2.56418e-08	0.000161803	8.35224
Prdx6	-0.488385	7.82241	-10.3031	3.04493e-08	0.000161803	9.33345
Dao	-0.877699	5.41725	-10.0989	5.02581e-08	0.000161803	8.76392
Gpcpd1	0.524917	6.59477	9.90863	5.12006e-08	0.000161803	8.82281
Col19a1	0.951069	4.0315	9.78568	6.03954e-08	0.000161803	8.20172
Kifc2	0.571352	7.37035	9.76654	6.19775e-08	0.000161803	8.64933
Vsir	-0.699599	6.17991	-9.53941	8.9246e-08	0.000182661	8.28227
Nf1x	-0.490409	7.16028	-9.46742	9.32894e-08	0.000182661	8.25408
Plekhd1	-0.529448	5.68398	-9.3037	1.17161e-07	0.000203912	7.99848
Acsbg1	-0.476725	8.67785	-9.01404	1.7659e-07	0.000234327	7.637
Dmxl1	0.391262	6.83737	8.94313	1.95525e-07	0.000234327	7.53628
Lrrc8d	-0.462353	5.94049	-8.9071	2.05956e-07	0.000234327	7.47353
Pde10a	0.552651	4.66568	8.79283	2.43103e-07	0.000234327	7.20397
Tial1	0.360757	6.25981	8.779	2.48056e-07	0.000234327	7.30142
Ssh3	0.502972	5.22653	8.7524	2.57884e-07	0.000234327	7.22199
Fam126b	0.436281	5.9375	8.73464	2.64673e-07	0.000234327	7.23296
Cpt2	-0.529301	4.43608	-8.70196	2.77662e-07	0.000234327	7.03704
Sacs	0.530758	8.09699	8.69187	2.81808e-07	0.000234327	7.18123
Cstf2	0.442605	6.82594	8.68564	2.84401e-07	0.000234327	7.17214
Ncan	-0.467572	6.46353	-8.64211	3.03228e-07	0.000234327	7.10873
Nos1ap	0.444761	4.68031	8.61815	3.14151e-07	0.000234327	6.97393
Dzank1	0.513715	6.8813	8.51796	3.64503e-07	0.000259526	6.93041
Aif1l	-0.605044	4.89748	-8.47766	3.8709e-07	0.000263625	6.80888
Wsb1	0.545616	7.54737	8.41831	4.23082e-07	0.000267894	6.784
Unc80	0.40105	8.54579	8.35045	4.68601e-07	0.000267894	6.68342
Gria2	0.437182	7.745	8.30412	5.02616e-07	0.000267894	6.6149
Slc25a36	0.362179	6.92651	8.28638	5.1632e-07	0.000267894	6.59014
Abca5	0.358885	6.5625	8.26043	5.37076e-07	0.000267894	6.55264
Psd2	-0.439286	7.84231	-8.25648	5.4031e-07	0.000267894	6.54384
Pamr1	-0.566795	5.56881	-8.23093	5.61749e-07	0.000267894	6.5011
Kcnj16	-0.395318	6.96551	-8.20672	5.82887e-07	0.000267894	6.47132
Rictor	0.404716	6.70656	8.1879	5.99894e-07	0.000267894	6.44414
Mapk9	0.375153	7.74173	8.15237	6.33444e-07	0.000267894	6.38779
Ednrb	-0.490658	8.6683	-8.14841	6.37311e-07	0.000267894	6.38164
Gba2	0.348804	6.55472	8.13969	6.45896e-07	0.000267894	6.37251
Vwa5b2	0.767936	6.01506	8.44019	6.48099e-07	0.000267894	6.4047
Rrbp1	-0.47117	7.46785	-8.13593	6.4964e-07	0.000267894	6.36354
Stxbp5	0.319501	7.4092	8.13567	6.49895e-07	0.000267894	6.36325
LOC102549102	0.81038	3.04778	8.11356	6.72369e-07	0.000270051	5.73238
Igsf9b	0.468239	4.77606	8.04971	7.41966e-07	0.000272621	6.19093
Tst	-0.512458	6.00274	-8.0399	7.53311e-07	0.000272621	6.22395
Abhd4	-0.373612	6.98883	-8.03182	7.62786e-07	0.000272621	6.20749
Ppip5k2	0.526248	4.50063	8.03004	7.64893e-07	0.000272621	6.12696
Crebrf	0.417515	6.90396	8.02929	7.6579e-07	0.000272621	6.2041
Dgki	0.399043	6.63096	7.99416	8.08682e-07	0.000278657	6.15227
Usp45	0.426591	5.72795	7.98653	8.18322e-07	0.000278657	6.14238
Fgfrl1	-0.571803	4.15239	-7.95874	8.54493e-07	0.000284782	5.95945
Pcdhgc3	-0.54859	6.49709	-7.90066	9.35603e-07	0.000292509	6.01066
Actb	-0.349598	9.88968	-7.8959	9.42612e-07	0.000292509	5.99936
Strbp	0.381866	7.9348	7.88066	9.65388e-07	0.000292509	5.97292
Eno1	-0.323177	9.63456	-7.86403	9.90895e-07	0.000292509	5.94945
Marcks	-0.546846	7.29017	-7.90793	9.91252e-07	0.000292509	5.95569
Plag1	0.768446	4.33523	7.86322	9.92168e-07	0.000292509	5.85631
Epb41l4b	0.539657	6.02756	7.85289	1.0084e-06	0.000292509	5.94059
Atp5e	-0.381455	6.3758	-7.78852	1.116e-06	0.000309782	5.83892
Prpf39	0.465843	5.79211	7.78168	1.12814e-06	0.000309782	5.83203
Celsr3	0.515968	6.47444	7.77466	1.14073e-06	0.000309782	5.8167
Hadha	-0.323126	7.72453	-7.76757	1.15359e-06	0.000309782	5.79774
Fnip1	0.472941	5.89584	7.74327	1.19884e-06	0.000309782	5.77285
Aurkc	0.658221	3.43639	7.73305	1.21842e-06	0.000309782	5.42536
Eqtn	0.81301	4.32949	7.76681	1.2434e-06	0.000309782	5.65069
Myo10	-0.389928	6.39918	-7.72024	1.24346e-06	0.000309782	5.73278
Idua	0.549313	6.18961	7.71081	1.26223e-06	0.000309782	5.72057
Cyp4f1	-0.847119	3.39153	-7.70908	1.26571e-06	0.000309782	5.3701
Cacna1d	0.430358	6.38101	7.67085	1.34513e-06	0.000324155	5.65605
LOC102556249	0.526108	4.74853	7.65176	1.38674e-06	0.00032912	5.60258
Wfdc1	-0.953802	5.3028	-8.14585	1.41951e-06	0.000330003	5.6593
Snph	0.401163	7.80033	7.60203	1.50159e-06	0.000330003	5.53739
Lsm6	-0.565654	3.77705	-7.6015	1.50287e-06	0.000330003	5.36106
Bicd1	0.445207	5.62567	7.58371	1.54639e-06	0.000330003	5.52649
Phyh	-0.337959	6.88217	-7.58334	1.54731e-06	0.000330003	5.51271
Trnl1	0.733016	6.07172	7.8759	1.5653e-06	0.000330003	5.556
Mapk8	0.360171	6.59404	7.57557	1.56674e-06	0.000330003	5.5036
Tmbim6	-0.263794	8.30792	-7.57391	1.57094e-06	0.000330003	5.49216
Zcchc7	0.533478	5.26395	7.56307	1.59854e-06	0.000330003	5.49136
Lyst	0.407525	6.20186	7.56004	1.60636e-06	0.000330003	5.48443
Folh1	-0.338313	5.98566	-7.55394	1.62221e-06	0.000330003	5.4775
Pkd1	0.356188	7.74076	7.54076	1.657e-06	0.000332759	5.44024
LOC103691033	0.562383	3.97089	7.527	1.69417e-06	0.000333135	5.30383
Ankrd12	0.358751	6.15282	7.51084	1.73895e-06	0.000333135	5.40743
Smo	-0.767778	5.26227	-7.71796	1.77415e-06	0.000333135	5.4182
Edn3	-0.949756	2.71958	-7.49102	1.79556e-06	0.000333135	4.79027
Cpeb4	0.335029	7.37442	7.48677	1.80794e-06	0.000333135	5.35561
Pla2g16	-0.365449	6.01192	-7.47287	1.84908e-06	0.000333135	5.34938
Clip4	0.401292	4.94224	7.46985	1.85815e-06	0.000333135	5.33853
Tbc1d24	0.427187	5.59061	7.46941	1.85949e-06	0.000333135	5.34796
Fabp7	-0.583007	6.72355	-7.57799	1.88499e-06	0.000333135	5.34062
Gdap1	0.399208	6.77809	7.45642	1.89907e-06	0.000333135	5.31206
Gria3	0.496739	6.47776	7.45317	1.90911e-06	0.000333135	5.31119
Rab30	0.337585	6.54524	7.45157	1.91408e-06	0.000333135	5.30728
Ca5b	-0.58922	3.60783	-7.42331	2.00401e-06	0.000344954	5.05875
Rhoc	-0.532779	5.26872	-7.39827	2.08742e-06	0.00035281	5.23527
Pygm	-0.441749	7.66272	-7.39613	2.0947e-06	0.00035281	5.20881
Serinc5	-0.551397	7.95317	-7.49254	2.12908e-06	0.000354786	5.21151
Amy1a	1.46979	1.91844	7.46559	2.18201e-06	0.000356883	4.239
Ccnd1	-0.574321	5.50014	-7.36964	2.18723e-06	0.000356883	5.19108
Tril	-0.371883	7.90351	-7.33617	2.31032e-06	0.000362729	5.11108
Gdpd2	-0.629601	5.13613	-7.35599	2.32821e-06	0.000362729	5.13177
Epas1	-0.528324	7.59067	-7.40884	2.33086e-06	0.000362729	5.1181
Chst5	-0.657303	1.88204	-7.32986	2.33436e-06	0.000362729	4.20311
Trnk	0.846894	4.80783	7.56997	2.33884e-06	0.000362729	5.13718
Cyp2j3	-0.825036	4.87457	-7.55263	2.36394e-06	0.000363027	5.13087
Glmn	0.441695	4.75972	7.31077	2.40858e-06	0.000366291	5.08383
Zfp483	0.427943	5.95585	7.28841	2.49872e-06	0.000373555	5.05607
Pnisr	0.438283	7.66826	7.28712	2.50404e-06	0.000373555	5.03216
Prex1	-0.29874	7.43352	-7.23518	2.72778e-06	0.000403094	4.94849
Per2	0.584878	4.82606	7.22478	2.77509e-06	0.000406253	4.95213
Acaa2	-0.515899	5.39506	-7.20892	2.84882e-06	0.000413185	4.93578
Miat	0.817357	8.25653	7.79282	2.99495e-06	0.000430393	4.96339
Ap3b2	0.338061	7.54873	7.16612	3.05831e-06	0.000435401	4.83461
Amhr2	-1.052	2.86276	-7.16081	3.08539e-06	0.000435401	4.41463
Fut9	0.488182	4.01041	7.15079	3.13721e-06	0.000437673	4.75717
RGD1560556	0.861101	1.29447	7.14694	3.15737e-06	0.000437673	3.71107
S100a16	-0.501646	6.50397	-7.13938	3.24239e-06	0.000439671	4.79081
Dnm3	0.421337	8.01705	7.12958	3.24993e-06	0.000439671	4.7728
Ackr1	0.539132	3.86278	7.12846	3.25599e-06	0.000439671	4.69475
Nmu	1.94271	3.1425	7.86059	3.30957e-06	0.000440873	4.3648
Zfp423	-0.494032	5.63463	-7.11032	3.35595e-06	0.000440873	4.77404
Ankrd28	0.306552	6.75558	7.10958	3.36012e-06	0.000440873	4.749
Tnfsf13	-0.813175	4.36314	-7.21526	3.37748e-06	0.000440873	4.7432
Pld4	-0.595421	4.90996	-7.08409	3.50619e-06	0.000447214	4.73245
Zranb2	0.288363	7.4515	7.07231	3.576e-06	0.000447214	4.68017
Plxnb1	-0.371921	7.68399	-7.06942	3.59329e-06	0.000447214	4.67418
Erp29	-0.415208	6.16303	-7.0679	3.60247e-06	0.000447214	4.69281
Tpcn1	-0.376495	7.14775	-7.0641	3.62546e-06	0.000447214	4.66899
Dock3	0.329637	7.47396	7.06246	3.63541e-06	0.000447214	4.66372
Zfp292	0.276533	5.67774	7.06026	3.64884e-06	0.000447214	4.69137
Npc2	-0.475993	6.74009	-7.05561	3.67735e-06	0.000447214	4.66046
Elovl5	-0.373395	7.91647	-7.05404	3.68707e-06	0.000447214	4.64781
Luc7l3	0.407999	7.2231	7.04658	3.73343e-06	0.000447214	4.6393
Slc9b2	0.851203	1.83902	7.04552	3.74011e-06	0.000447214	3.83669
Cep97	0.42586	4.57414	7.03599	3.80038e-06	0.000450978	4.6433
Col24a1	1.12235	1.96397	7.0314	3.82973e-06	0.000451044	3.87182
Sepn1	-0.363551	6.51053	-7.01122	3.96179e-06	0.000457525	4.59092
Sfswap	0.351153	5.82284	7.00967	3.97218e-06	0.000457525	4.60527
Inppl1	-0.429891	6.35135	-7.0045	4.00689e-06	0.000457525	4.58355
Abcc5	0.360584	7.68457	7.00357	4.01311e-06	0.000457525	4.56457
Alox15	-1.53618	1.08686	-7.04314	4.0308e-06	0.000457525	3.41742
Gpr157	0.868835	2.76865	6.98968	4.10805e-06	0.000462939	4.14889
Dtx4	-0.419382	5.46755	-6.98137	4.16598e-06	0.000463583	4.56647
Fgf14	0.480718	5.07517	6.98038	4.17296e-06	0.000463583	4.56805
Suclg2	-0.478438	6.7104	-6.95846	4.33015e-06	0.000475239	4.49942
Atmin	0.385625	5.92268	6.95731	4.33856e-06	0.000475239	4.51638
Acad11	-0.545851	4.68111	-6.95112	4.38416e-06	0.000476899	4.51304
Rlbp1	-0.524636	5.07634	-6.92957	4.54687e-06	0.00049084	4.48555
Dynll1	-0.349977	7.21914	-6.92593	4.57499e-06	0.00049084	4.43775
Gabarap	-0.26883	7.10424	-6.91735	4.64192e-06	0.000491519	4.42441
LOC500956	0.331026	5.89135	6.91611	4.65174e-06	0.000491519	4.44877
Il17rd	-0.567228	5.60325	-6.96523	4.67545e-06	0.000491519	4.46132
Oxct1	-0.336423	8.00108	-6.90782	4.71757e-06	0.00049264	4.40295
Tbkbp1	0.348096	6.30189	6.89306	4.83717e-06	0.000501507	4.39895
Prpf40b	0.313857	6.06158	6.88886	4.87178e-06	0.000501507	4.39854
Grin2a	0.504049	5.94516	6.88369	4.91477e-06	0.000501507	4.39377
LOC685152	0.29921	6.87278	6.87703	4.97065e-06	0.000501507	4.35968
Tkt	-0.251267	8.15961	-6.87027	5.02814e-06	0.000501507	4.33933
Sel1l3	-0.596324	6.20783	-7.02469	5.08635e-06	0.000501507	4.38498
Agpat1	-0.358106	7.21627	-6.86106	5.10754e-06	0.000501507	4.32857
Col9a2	0.990564	4.56554	7.2526	5.11271e-06	0.000501507	4.4037
Fads2	-0.456903	7.12499	-6.85047	5.20042e-06	0.000501507	4.3118
Vhl	-0.319293	5.99209	-6.85032	5.20176e-06	0.000501507	4.33611
Setd5	0.26798	7.16886	6.84485	5.25048e-06	0.000501507	4.30158
Slc25a18	-0.461249	7.12887	-6.84218	5.27441e-06	0.000501507	4.29775
Mcf2l	0.380616	7.40776	6.84197	5.27631e-06	0.000501507	4.29469
Cntnap2	0.27087	7.5595	6.8413	5.28235e-06	0.000501507	4.29244
Mroh7	0.673535	3.87311	6.84126	5.28272e-06	0.000501507	4.25796
Rbm42	-0.288074	5.55141	-6.82304	5.44945e-06	0.000514218	4.30305
Nrep	-0.577225	6.35233	-6.96042	5.58402e-06	0.000521822	4.28802
Cttnbp2	0.252409	6.29552	6.80743	5.59666e-06	0.000521822	4.25503
Agrn	0.332507	7.50181	6.80077	5.66075e-06	0.000522624	4.22414
Chpf2	0.40234	5.86425	6.79961	5.67199e-06	0.000522624	4.25525
Aqp9	-0.519301	4.10431	-6.78398	5.82575e-06	0.000533653	4.20426
LOC100910200	-0.900376	0.500048	-6.77801	5.88565e-06	0.000536004	2.92226
Slc4a8	0.423031	6.75101	6.77072	5.9596e-06	0.000536752	4.18232
Zfp711	0.687111	3.72053	6.77045	5.96239e-06	0.000536752	4.12065
Dgke	0.2749	6.71834	6.7654	6.01422e-06	0.000538324	4.17354
Ngfr	-1.06742	3.15114	-6.85501	6.06168e-06	0.000539489	3.95236
Napb	0.440777	8.72518	6.75633	6.1085e-06	0.000540585	4.14682
Miga1	0.273989	7.17155	6.75141	6.16036e-06	0.000542111	4.14297
Neto1	0.58344	4.41253	6.74326	6.24715e-06	0.000545059	4.16554
Matn4	-1.01707	1.98103	-6.74174	6.26345e-06	0.000545059	3.51055
LOC103690800	0.880312	2.38869	6.73677	6.31716e-06	0.000546397	3.66326
Drp2	-0.370035	6.17938	-6.73389	6.34859e-06	0.000546397	4.13437
Nbea	0.268026	7.75776	6.72999	6.39127e-06	0.000547064	4.10206
Limd1	-0.439309	4.12766	-6.71211	6.59095e-06	0.000558435	4.09365
Hexb	-0.302158	6.7971	-6.71172	6.59541e-06	0.000558435	4.08062
Lman2	-0.329083	5.77536	-6.70623	6.65803e-06	0.000560208	4.10062
Ksr2	0.409341	5.45317	6.70364	6.68788e-06	0.000560208	4.10627
Ptn	-0.60849	7.92662	-6.95663	6.7728e-06	0.000560766	4.10167
LOC100911253	0.646827	4.62128	6.72109	6.8017e-06	0.000560766	4.09845
Srrm2	0.322587	9.69996	6.69383	6.80194e-06	0.000560766	4.045
Hddc3	-0.525726	4.98259	-6.68296	6.93059e-06	0.000568381	4.08042
Nf2	-0.331491	6.45316	-6.67632	7.01059e-06	0.000571947	4.0282
Pccb	-0.517412	5.21718	-6.67012	7.08602e-06	0.000575106	4.0559
Clasrp	0.509304	6.02355	6.68448	7.37661e-06	0.000594245	4.0003
Epb41	0.332978	5.99622	6.64523	7.39771e-06	0.000594245	3.98969
Ckb	-0.291315	10.7734	-6.63127	7.57881e-06	0.000605686	3.94659
Ehd1	-0.30458	6.07941	-6.62559	7.65374e-06	0.00060857	3.9532
Lcn12	0.655933	1.68721	6.62181	7.70407e-06	0.000609478	3.24507
Ttc33	0.321278	6.74584	6.61685	7.77067e-06	0.000611657	3.91914
LOC306766	-0.278946	7.46893	-6.61096	7.85055e-06	0.000611998	3.89937
Zhx3	-0.277007	7.02533	-6.60584	7.92063e-06	0.000611998	3.89523
Acadvl	-0.334121	6.32623	-6.60064	7.99246e-06	0.000611998	3.90234
Pld1	-0.492894	5.33438	-6.60035	7.99653e-06	0.000611998	3.93573
Maob	-0.749909	6.73672	-7.07584	7.99741e-06	0.000611998	3.99357
Ogdh	-0.293584	7.08346	-6.59897	8.01578e-06	0.000611998	3.88258
Mmp15	-0.542324	6.07923	-6.68217	8.08862e-06	0.000611998	3.91893
Laptm5	-0.60077	4.95848	-6.62772	8.13003e-06	0.000611998	3.93377
Kcnt1	0.527198	6.64498	6.69883	8.15207e-06	0.000611998	3.89967
Hivep2	0.291083	6.55541	6.58831	8.1657e-06	0.000611998	3.87436
Eml5	0.463862	5.40959	6.58335	8.23645e-06	0.000613785	3.90475
Fads1	-0.639474	8.14345	-6.91124	8.26792e-06	0.000613785	3.91999
Sfxn4	0.489661	4.53911	6.57661	8.33354e-06	0.000615738	3.90001
Fam120a	-0.251963	7.26394	-6.56623	8.48557e-06	0.000621545	3.82386
Uqcr11	-0.357733	6.67965	-6.56583	8.49148e-06	0.000621545	3.83269
Col4a3bp	0.295858	7.25489	6.55378	8.6717e-06	0.000629334	3.80244
Marcksl1	-0.542447	5.34363	-6.57434	8.67826e-06	0.000629334	3.86029
Orc4	0.413608	6.14595	6.54708	8.7736e-06	0.000631759	3.81657
Tsc1	0.302488	6.71689	6.54531	8.80071e-06	0.000631759	3.79625
Tet3	0.414957	5.56492	6.54324	8.83269e-06	0.000631759	3.8313
Yipf3	-0.288854	6.1673	-6.53696	8.93e-06	0.000635743	3.79795
Inpp4a	0.267146	7.57052	6.53366	8.98159e-06	0.000635743	3.76481
Csmd3	0.545675	4.8687	6.53184	9.01014e-06	0.000635743	3.82898
Pmel	-0.955786	2.47869	-6.51846	9.22338e-06	0.00064787	3.39253
Thoc1	0.445224	5.10533	6.51275	9.31599e-06	0.000651454	3.79323
Dpy19l3	-0.473832	7.27229	-6.56711	9.47826e-06	0.000655704	3.72961
Fancm	0.435359	5.38484	6.50282	9.47916e-06	0.000655704	3.76851
Slc8a1	0.312974	7.84869	6.50143	9.50235e-06	0.000655704	3.70724
Tmem86b	0.844241	1.79563	6.491	9.6776e-06	0.000662262	3.1118
Tgfb2	-0.347731	5.84556	-6.49074	9.68195e-06	0.000662262	3.7305
Slc20a2	-0.459416	7.41192	-6.52463	9.86469e-06	0.000671829	3.68386
Clic4	-0.386552	6.32545	-6.4756	9.94237e-06	0.000674187	3.68663
Aqp4	-0.477999	10.7338	-6.5205	1.00823e-05	0.000675084	3.67599
Aldh7a1	-0.496654	6.5049	-6.53608	1.01222e-05	0.000675084	3.6805
Sgcg	-0.820491	3.6084	-6.4947	1.01292e-05	0.000675084	3.62495
Hsd17b12	-0.219538	7.08373	-6.46282	1.0168e-05	0.000675084	3.64618
Sfxn5	-0.620302	7.1417	-6.74909	1.01711e-05	0.000675084	3.71282
Kcnj10	-0.378697	8.34594	-6.45675	1.02769e-05	0.000677862	3.62848
Rhpn2	-0.533876	4.7948	-6.45551	1.02995e-05	0.000677862	3.70108
Myt1l	0.348749	6.35065	6.45294	1.0346e-05	0.000678074	3.64634
Dag1	-0.291211	7.71162	-6.4502	1.0396e-05	0.000678511	3.61843
Ucp2	-1.06063	6.61186	-7.26012	1.06065e-05	0.000689381	3.7878
Acap3	0.277667	5.92618	6.42883	1.07942e-05	0.000695625	3.62015
Rpn2	-0.373985	7.26061	-6.42702	1.08288e-05	0.000695625	3.58158
C1qtnf5	-0.93669	5.19267	-6.92565	1.08598e-05	0.000695625	3.73452
Rnpc3	0.401815	5.09698	6.42433	1.08802e-05	0.000695625	3.64311
Zufsp	0.388556	4.57437	6.42113	1.09416e-05	0.000696706	3.64256
Pfn1	-0.284458	6.72886	-6.41512	1.10581e-05	0.00070072	3.56933
Rock2	0.292321	7.46216	6.41232	1.11129e-05	0.00070072	3.55379
Arhgap25	-0.662533	2.64913	-6.411	1.11389e-05	0.00070072	3.2941
Msi1	-0.411432	5.07914	-6.40414	1.12744e-05	0.000703715	3.60912
Vash2	0.506884	3.68239	6.40404	1.12763e-05	0.000703715	3.54363
Carf	0.422229	4.61338	6.3968	1.14215e-05	0.000707211	3.60207
Cnn3	-0.349586	7.31765	-6.39674	1.14227e-05	0.000707211	3.52784
Bend6	0.374219	8.24335	6.39109	1.15372e-05	0.00070985	3.51327
L3mbtl1	0.821438	4.07643	6.51671	1.15559e-05	0.00070985	3.58084
Tmem185b	-0.287001	4.99553	-6.3807	1.1751e-05	0.000715668	3.57095
Cat	-0.445107	6.92056	-6.39949	1.17711e-05	0.000715668	3.50871
Ano3	0.629636	4.10246	6.37893	1.17877e-05	0.000715668	3.55104
Cpt1a	-0.39424	6.27762	-6.37191	1.19349e-05	0.000721808	3.50765
LOC108348192	0.810539	2.11793	6.36103	1.21669e-05	0.000733009	3.05036
Atox1	-0.364553	4.79744	-6.35228	1.2357e-05	0.000739634	3.52622
Ltbr	-0.439913	5.01842	-6.35042	1.23978e-05	0.000739634	3.51889
Atp1b2	-0.398765	10.3512	-6.34948	1.24185e-05	0.000739634	3.45268
Nectin2	-0.349225	5.14248	-6.34607	1.24937e-05	0.000741294	3.50762
LOC681177	0.703136	2.37802	6.33878	1.26561e-05	0.000748095	3.10505
Slc7a8	-0.886304	6.86585	-6.97877	1.27306e-05	0.000749667	3.5736
Slc27a1	-0.365758	7.14884	-6.33201	1.28092e-05	0.00075103	3.41587
Asrgl1	-0.474065	6.48635	-6.38125	1.28496e-05	0.00075103	3.4404
2008-09-01	-0.273849	8.37752	-6.31952	1.30962e-05	0.000762597	3.38703
Zfp192	0.330963	5.95128	6.31459	1.32115e-05	0.000766464	3.42012
Cpsf6	0.258401	6.99697	6.30807	1.33654e-05	0.000769095	3.37573
Gpr37l1	-0.757621	8.05373	-6.82697	1.33929e-05	0.000769095	3.48881
Agpat5	-0.239484	6.32733	-6.30644	1.34042e-05	0.000769095	3.39044
Atp11b	0.303565	5.58603	6.30361	1.34719e-05	0.000770158	3.4168
Egfl7	0.524799	3.61974	6.29817	1.36029e-05	0.000772926	3.36437
Ssfa2	-0.25108	7.02006	-6.2975	1.3619e-05	0.000772926	3.35663
Gng10	-0.346553	5.60041	-6.2952	1.36748e-05	0.000773293	3.4016
RGD1306148	0.255161	7.7726	6.29129	1.37702e-05	0.000775889	3.33819
LOC102554677	0.992223	1.17481	6.28289	1.39777e-05	0.000777914	2.611
Abat	-0.293638	9.10995	-6.28289	1.39779e-05	0.000777914	3.32486
Sf3b1	0.25473	8.27469	6.28213	1.39967e-05	0.000777914	3.32068
Ndufb10	-0.273928	6.45505	-6.28181	1.40048e-05	0.000777914	3.34262
Npepo	0.495922	4.24811	6.27747	1.41134e-05	0.000781175	3.39272
Szrd1	-0.481934	6.06945	-6.31548	1.41741e-05	0.000781771	3.35616
Mt3	-0.378288	7.21113	-6.26976	1.43088e-05	0.000786429	3.30495
Zfp451	0.256715	5.87225	6.26577	1.4411e-05	0.000789278	3.33769
Prelid3a	0.415323	5.10581	6.25778	1.46178e-05	0.000796121	3.35668
Degs1	-0.270448	7.13111	-6.25702	1.46376e-05	0.000796121	3.28324
Zc3h12b	0.452206	3.27342	6.25191	1.47718e-05	0.000800642	3.227
Card11	-0.889456	2.70685	-6.24626	1.49214e-05	0.000805962	3.06778
Slc9a7	0.378113	6.00797	6.24416	1.49776e-05	0.000806215	3.29406
Dock1	-0.451502	6.60163	-6.27229	1.50805e-05	0.000808973	3.27353
Chdh	-1.26793	3.67281	-6.66237	1.52583e-05	0.00081572	3.287
LOC102554754	0.811561	2.35117	6.23144	1.5322e-05	0.000816341	2.94274
Mpst	-0.381539	4.17769	-6.22443	1.55152e-05	0.000819235	3.30118
Kdm7a	0.405893	5.43232	6.22311	1.55518e-05	0.000819235	3.2833
Prdx1	-0.263724	7.26882	-6.22228	1.55751e-05	0.000819235	3.21968
Tmem9b	-0.226017	6.63432	-6.2219	1.55856e-05	0.000819235	3.23083
Invs	0.609781	4.14124	6.21978	1.5645e-05	0.00081961	3.29033
Col16a1	0.699552	5.74466	6.52275	1.5773e-05	0.00082056	3.3269
Cdkl5	0.376414	4.04602	6.21365	1.58175e-05	0.00082056	3.27543
Plpp3	-0.326563	8.19818	-6.21257	1.5848e-05	0.00082056	3.19695
Epha8	0.548368	3.65519	6.20943	1.59376e-05	0.00082056	3.22638
Dopey1	0.324149	6.29078	6.20816	1.59738e-05	0.00082056	3.21839
Abhd3	-0.320934	7.84224	-6.20803	1.59774e-05	0.00082056	3.18978
Camkk1	0.404201	7.03086	6.19729	1.62882e-05	0.000832255	3.17873
Lasp1	-0.300911	7.14748	-6.19304	1.64127e-05	0.000832255	3.16914
Rnf207	0.766267	2.95113	6.193	1.64139e-05	0.000832255	3.05499
Cdk2ap1	-0.226057	6.47972	-6.19032	1.6493e-05	0.000832255	3.17945
Bcat2	-1.00158	4.70705	-6.65033	1.65388e-05	0.000832255	3.32825
Abhd1	-0.714746	4.14701	-6.25216	1.65579e-05	0.000832255	3.24693
Hadh	-0.359639	4.39539	-6.1861	1.66184e-05	0.000832255	3.24345
Pggt1b	0.364419	5.33135	6.1857	1.66302e-05	0.000832255	3.2221
Epg5	0.24619	6.42842	6.18202	1.67405e-05	0.000833627	3.16654
Mid1ip1	-0.384984	7.4885	-6.18096	1.67722e-05	0.000833627	3.14385
Etv1	-0.538964	5.6207	-6.2541	1.68685e-05	0.000833627	3.21383
Gucy1a2	0.565908	3.55904	6.17771	1.68705e-05	0.000833627	3.16069
Spns2	0.342683	5.64284	6.17446	1.69693e-05	0.000835871	3.18784
Btbd17	-0.499155	3.87328	-6.17022	1.70989e-05	0.000839615	3.18855
Pigt	-0.303482	6.6211	-6.16582	1.72346e-05	0.000843635	3.13156
Ryr2	0.399317	7.7717	6.1628	1.73285e-05	0.000845588	3.10934
Snx5	-0.302505	6.97421	-6.15477	1.75804e-05	0.000851231	3.10351
Pnrc2	-0.346498	5.97964	-6.15455	1.75873e-05	0.000851231	3.1366
Ninj2	-0.605758	4.1309	-6.15004	1.77306e-05	0.000851231	3.17305
Hsd17b10	-0.29379	5.08598	-6.14865	1.7775e-05	0.000851231	3.16729
Slitrk4	0.485823	3.84353	6.14803	1.77948e-05	0.000851231	3.14902
Dgkq	0.301025	6.33711	6.14636	1.78484e-05	0.000851231	3.10659
Cpeb1	0.383647	5.59299	6.14495	1.78939e-05	0.000851231	3.13832
LOC102547415	0.780941	1.18754	6.14442	1.79108e-05	0.000851231	2.43982
Rassf3	-0.617027	4.38587	-6.15387	1.79441e-05	0.000851231	3.17218
Zzef1	0.225184	6.78205	6.14155	1.80038e-05	0.000851231	3.08369
Srek1	0.377271	6.91371	6.14037	1.80419e-05	0.000851231	3.07913
Baalc	-0.416831	6.94632	-6.1345	1.82339e-05	0.000857703	3.06804
Alpl	-0.875902	3.74823	-6.25461	1.83932e-05	0.000861159	3.11832
Zfp512b	0.317686	5.87149	6.12736	1.84698e-05	0.000861159	3.09334
Ppib	-0.255761	6.3246	-6.12729	1.84723e-05	0.000861159	3.07285
LOC690131	-0.977177	1.27887	-6.12269	1.86259e-05	0.000863475	2.44014
Ctsz	-0.701525	4.77258	-6.2811	1.86322e-05	0.000863475	3.16473
Laptm4a	-0.452595	8.21617	-6.18604	1.87191e-05	0.000864945	3.0492
Mfn1	0.535769	7.13711	6.29667	1.87868e-05	0.000865519	3.08275
Fam76b	0.399755	4.36229	6.11384	1.89258e-05	0.000866403	3.11982
Prdm11	0.296364	5.07567	6.11225	1.898e-05	0.000866403	3.10405
Cmtm7	-0.589184	3.18471	-6.11134	1.90112e-05	0.000866403	2.98571
Rap1gap2	0.382483	7.44435	6.11087	1.90272e-05	0.000866403	3.0186
Adcy9	0.3709	6.0482	6.10724	1.91524e-05	0.000868766	3.04934
Prkab2	0.507283	4.98319	6.10589	1.91991e-05	0.000868766	3.09714
Plcd4	-0.405432	5.87598	-6.10456	1.92455e-05	0.000868766	3.05286
Lime1	0.493126	5.19214	6.1018	1.93415e-05	0.000870303	3.08149
Rsrp1	0.448578	7.70027	6.16238	1.93907e-05	0.000870303	3.01478
Fnbp4	0.384977	5.78312	6.09807	1.94722e-05	0.000871463	3.04579
Me1	-0.36572	7.59	-6.09154	1.97036e-05	0.000879306	2.98249
Adam11	0.415859	7.42643	6.1038	1.98073e-05	0.000880694	2.983
Espn	-1.45138	2.90788	-6.46251	1.98914e-05	0.000880694	2.87025
Tnrc6c	0.275948	6.35024	6.08595	1.99033e-05	0.000880694	2.99796
Mbnl1	0.310833	5.92683	6.084	1.99738e-05	0.000881322	3.01344
Cd9	-0.417298	7.14351	-6.09185	2.01948e-05	0.000885258	2.96681
Nkain4	-0.688751	5.15845	-6.28179	2.02406e-05	0.000885258	3.08548
Chi3l1	-0.442632	6.42186	-6.10292	2.02826e-05	0.000885258	2.98452
Bcar3	-0.569631	4.78545	-6.10333	2.0289e-05	0.000885258	3.05623
Fam135b	0.457369	4.84504	6.0703	2.04751e-05	0.000888409	3.03943
Atp6v0e1	-0.459748	4.77996	-6.07009	2.04827e-05	0.000888409	3.04094
Atp1a1	-0.554638	9.80667	-6.27249	2.05591e-05	0.000888409	3.00085
Cdk2ap2	-0.428484	4.20386	-6.06726	2.05881e-05	0.000888409	3.0368
LOC102547703	0.570423	3.79266	6.06492	2.06756e-05	0.000889732	3.00563
Zfp958	0.4785	4.58306	6.06199	2.07855e-05	0.000890528	3.03084
Lgr5	0.549016	3.35717	6.0614	2.08078e-05	0.000890528	2.94003
Bdnf	1.0088	4.10907	6.3762	2.12479e-05	0.000906887	3.04683
Nnt	-0.494532	6.53583	-6.15049	2.13881e-05	0.000910391	2.94878
Lix1	-0.470436	5.27849	-6.0404	2.16152e-05	0.000917562	2.969
Sil1	-0.328995	4.73198	-6.02897	2.20684e-05	0.000928911	2.97021
LOC102557338	0.571084	2.68248	6.02772	2.21185e-05	0.000928911	2.73434
Rab7b	-0.661182	3.73333	-6.02721	2.21389e-05	0.000928911	2.93618
LOC689064	-1.27022	0.897647	-6.02596	2.21893e-05	0.000928911	2.17526
Selplg	-0.397829	5.09609	-6.02529	2.22163e-05	0.000928911	2.9505
LOC102546835	0.685439	3.03108	6.02449	2.22488e-05	0.000928911	2.81402
Ogt	0.267686	8.1047	6.02328	2.22977e-05	0.000928911	2.85665
Gas5	0.42419	4.99543	6.01798	2.25136e-05	0.000933065	2.94209
Padi2	-0.529819	7.38135	-6.19685	2.25165e-05	0.000933065	2.90084
RGD1305110	0.381477	6.54738	6.01353	2.26963e-05	0.000936389	2.86083
Bsn	0.260249	7.46671	6.01174	2.277e-05	0.000936389	2.8393
Mmd2	-0.348996	7.56881	-6.01116	2.27943e-05	0.000936389	2.83742
Rdh11	-0.278752	5.19001	-6.00931	2.2871e-05	0.000936389	2.91751
Nop56	0.261202	6.27029	6.00744	2.2949e-05	0.000936389	2.86001
LOC501033	0.4936	5.08121	6.00556	2.30276e-05	0.000936389	2.91678
Mall	-1.04729	1.65222	-6.00345	2.31161e-05	0.000936389	2.39891
Slc9a3r1	-0.555893	5.21446	-6.0714	2.31249e-05	0.000936389	2.92308
Serf2	-0.439695	6.71801	-6.04466	2.31347e-05	0.000936389	2.84836
Pter	-0.751373	2.2833	-5.99812	2.33414e-05	0.000942319	2.58233
Gpr17	-0.581018	5.63749	-6.14381	2.34247e-05	0.000942935	2.90963
Ptgr1	-0.976213	2.19326	-5.99494	2.34771e-05	0.000942935	2.55173
Rbm33	0.369196	6.72703	5.98798	2.37763e-05	0.000947292	2.80903
Tspan33	-0.622582	5.44429	-6.1629	2.37965e-05	0.000947292	2.91033
Tbc1d4	0.411099	5.3599	5.98666	2.38335e-05	0.000947292	2.86923
RGD1309821	-0.475242	5.78847	-6.02108	2.38564e-05	0.000947292	2.85508
Rtbdn	0.839191	2.82857	5.98541	2.38879e-05	0.000947292	2.7038
Trdmt1	0.347058	4.63093	5.97966	2.41395e-05	0.000953362	2.88665
Leng8	0.528964	7.98245	6.1635	2.41627e-05	0.000953362	2.82858
Zfp185	-0.859266	2.32539	-5.97442	2.43715e-05	0.000957044	2.55897
Kank4	-0.430521	4.7238	-5.97327	2.44225e-05	0.000957044	2.8732
Tgfb3	-0.699844	3.67161	-5.97289	2.44393e-05	0.000957044	2.83892
Mrps23	-0.28006	4.67943	-5.96951	2.45907e-05	0.000960571	2.86755
Sf3b2	-0.186986	7.59705	-5.95775	2.51239e-05	0.000978959	2.74006
Acsm5	-1.05769	1.9406	-5.95017	2.54743e-05	0.000990146	2.41151
Skil	0.321364	6.22333	5.94664	2.56388e-05	0.000994076	2.75246
Pdia6	-0.35768	7.21063	-5.94139	2.58864e-05	0.000996281	2.71458
Cpeb3	0.339978	7.57132	5.94021	2.59423e-05	0.000996281	2.70845
Hopx	-0.437366	5.62109	-5.93953	2.59742e-05	0.000996281	2.77097
Ctnnb1	-0.24849	8.31192	-5.93819	2.60382e-05	0.000996281	2.70185
Plekha5	0.347442	5.85911	5.93808	2.60432e-05	0.000996281	2.75516
Smpd1	-0.269603	7.01397	-5.93737	2.60773e-05	0.000996281	2.71029
Slf2	0.342821	6.00361	5.93491	2.61948e-05	0.000998335	2.7419
2002-09-01	-0.312418	7.80479	-5.93138	2.63643e-05	0.00100236	2.6907
Tmco1	-0.334423	4.84218	-5.92699	2.65771e-05	0.00100712	2.78737
Lhfpl2	-0.399568	5.91669	-5.92615	2.66181e-05	0.00100712	2.73072
Gfpt1	-0.213198	7.05639	-5.92329	2.67576e-05	0.00100995	2.68378
Cbx7	0.299567	6.16464	5.91663	2.7086e-05	0.00101989	2.7007
Kmt2a	0.27897	7.73214	5.9098	2.74269e-05	0.00103025	2.65172
Usp29	0.326976	7.35983	5.90475	2.76818e-05	0.00103734	2.64583
Trnm	0.490337	7.66766	6.03122	2.80614e-05	0.00104755	2.66815
Mtss1l	-0.349447	8.82132	-5.89576	2.81421e-05	0.00104755	2.62595
Zdhhc21	0.424179	4.85143	5.89551	2.8155e-05	0.00104755	2.7316
Mycbp2_1	0.216385	8.39284	5.89285	2.82925e-05	0.00104952	2.61912
Glmp	-0.508495	5.00451	-5.89389	2.8342e-05	0.00104952	2.71919
Coro2b	-0.24915	7.44995	-5.8894	2.84724e-05	0.00105187	2.61669
Emc10	-0.28646	6.5108	-5.88225	2.88484e-05	0.00106311	2.62338
Arglu1	0.354801	6.07634	5.88006	2.89647e-05	0.00106311	2.63883
Paxbp1	0.367543	5.64218	5.87855	2.9045e-05	0.00106311	2.65964
Vegfb	-0.344781	6.0041	-5.87849	2.90483e-05	0.00106311	2.63959
Itsn2	0.334005	6.55899	5.87593	2.91851e-05	0.00106563	2.61037
Khsrp	-0.305258	6.17643	-5.8735	2.93159e-05	0.00106792	2.62176
Il17ra	-0.401609	4.61605	-5.87097	2.94521e-05	0.00107039	2.69638
Ctsl	-0.255367	7.06424	-5.86736	2.96486e-05	0.00107504	2.58151
Slc7a6	0.331225	4.96461	5.86546	2.97522e-05	0.0010763	2.67281
RGD1560289	0.450928	5.155	5.86415	2.98236e-05	0.0010764	2.66134
Oprl1	0.455479	5.67477	5.87196	3.00049e-05	0.00108045	2.62926
Tcn2	-0.897612	6.10656	-6.4201	3.02352e-05	0.00108134	2.74117
Pclo	0.311925	7.45367	5.85577	3.02868e-05	0.00108134	2.55515
Tspoap1	0.432056	7.20589	5.91201	3.02982e-05	0.00108134	2.57466
Phf14	0.252561	6.76254	5.85543	3.03057e-05	0.00108134	2.56632
LOC103692550	0.724834	2.72925	5.85026	3.05959e-05	0.00108921	2.47144
Mdm4	0.315558	7.26027	5.84779	3.07349e-05	0.00109168	2.54279
Gsk3b	0.229588	8.38166	5.84279	3.10192e-05	0.00109929	2.52734
Mmachc	-0.37213	3.35737	-5.84118	3.11116e-05	0.00110007	2.58312
RGD1559896	-0.295614	7.5271	-5.8369	3.13576e-05	0.00110627	2.51976
Noc2l	0.28688	5.88078	5.83033	3.17396e-05	0.00111392	2.55847
Gdf10	-1.15288	4.0642	-6.26418	3.17542e-05	0.00111392	2.68838
Rbsn	0.301015	6.36448	5.82951	3.17876e-05	0.00111392	2.53297
Dhx34	-0.33055	3.84394	-5.82443	3.20866e-05	0.00112188	2.60658
Map3k12	0.228348	6.86851	5.8199	3.23556e-05	0.00112661	2.49845
LOC102556078	1.0015	0.743613	5.8195	3.23798e-05	0.00112661	1.85826
Mef2a	0.314121	6.54671	5.81853	3.24376e-05	0.00112661	2.5057
Rev3l	0.243875	6.37573	5.81576	3.26037e-05	0.00112988	2.50712
Cep95	0.430932	4.37799	5.81293	3.27746e-05	0.00113329	2.59904
Crbn	0.331262	6.76101	5.81028	3.29352e-05	0.00113596	2.48382
Fam161b	0.30146	4.32575	5.80927	3.29967e-05	0.00113596	2.59297
Uvssa	0.473982	2.89317	5.80628	3.31796e-05	0.00113975	2.44103
Mgst1	-0.464419	5.15791	-5.80298	3.33822e-05	0.0011442	2.55131
Cela3b	-1.19935	0.833902	-5.80145	3.34765e-05	0.00114492	1.86129
Ttbk2	0.306505	7.63031	5.79979	3.35795e-05	0.00114595	2.45063
Erich3	0.371834	6.3377	5.79207	3.40616e-05	0.00115791	2.46584
Slc8a3	0.364896	5.78717	5.79099	3.41299e-05	0.00115791	2.49237
Pea15	-0.303076	9.35602	-5.78841	3.42933e-05	0.00115791	2.43227
Adgrg1	-0.337694	7.80515	-5.78622	3.4432e-05	0.00115791	2.42446
Tecta	-0.496615	4.25839	-5.78588	3.44541e-05	0.00115791	2.55222
Cacnb2	0.318328	5.52233	5.78541	3.44836e-05	0.00115791	2.49769
Grk4	0.436615	3.15922	5.78283	3.46489e-05	0.00115791	2.45514
Itm2c	-0.332336	9.51592	-5.78213	3.46939e-05	0.00115791	2.42207
Cmbl	-0.373624	4.42169	-5.78181	3.47144e-05	0.00115791	2.54363
Mturn	0.322045	7.14573	5.78169	3.47221e-05	0.00115791	2.42293
Herc1	0.246652	8.26456	5.78087	3.47744e-05	0.00115791	2.41324
Mgea5	0.259743	7.70044	5.78021	3.4817e-05	0.00115791	2.41399
Ddhd2	0.266413	6.92395	5.77658	3.50519e-05	0.00116325	2.41758
Wdfy4	-0.687289	2.42518	-5.77123	3.54005e-05	0.00117198	2.27792
Ctnna1	-0.321517	7.27101	-5.7688	3.55603e-05	0.00117198	2.39729
Ager	0.846606	2.23545	5.76827	3.55949e-05	0.00117198	2.22647
Slc27a2	0.559069	3.81173	5.76798	3.56144e-05	0.00117198	2.50707
Smg1	0.285165	7.78011	5.76439	3.5852e-05	0.00117296	2.38425
Rps6kb2	0.378702	4.42343	5.7631	3.59376e-05	0.00117296	2.51062
Donson	0.429262	4.03797	5.76216	3.60001e-05	0.00117296	2.50787
Pigk	-0.264741	5.81005	-5.7617	3.6031e-05	0.00117296	2.43718
Ccdc82	0.35769	5.2629	5.76066	3.61003e-05	0.00117296	2.4684
Mrps17	-0.387407	4.27007	-5.76026	3.61268e-05	0.00117296	2.50734
Nfat5	0.227764	7.10489	5.75864	3.62358e-05	0.00117296	2.38092
Tnfrsf19	-0.460917	4.04498	-5.75742	3.63173e-05	0.00117296	2.49981
Akt2	-0.398321	5.98405	-5.75741	3.63181e-05	0.00117296	2.42006
Lgi4	-0.364629	6.40622	-5.75542	3.64527e-05	0.00117466	2.39547
Ganab	-0.275493	7.72415	-5.75251	3.66493e-05	0.00117466	2.36267
Chtf8	-0.315786	5.482	-5.75234	3.66613e-05	0.00117466	2.4399
Cd302	-0.405731	5.60476	-5.75142	3.6724e-05	0.00117466	2.43118
Haus7	0.410618	3.79897	5.7511	3.67458e-05	0.00117466	2.47811
Capn6	-0.768001	2.78854	-5.74875	3.69061e-05	0.00117739	2.32483
Pdzd7	0.781029	4.49316	5.95332	3.72168e-05	0.00118489	2.52151
Med12l	0.338899	3.76754	5.74196	3.73734e-05	0.00118746	2.46073
Fbxo2	-0.301964	7.88114	-5.73675	3.77368e-05	0.00119561	2.33259
Tmem145	0.386308	6.29133	5.73609	3.77826e-05	0.00119561	2.36518
Tmod2	0.28013	7.17785	5.73393	3.79346e-05	0.001198	2.33418
Pcdh11x	0.58736	4.18598	5.72818	3.83418e-05	0.00120842	2.45094
Pign	-0.509018	4.55963	-5.72632	3.84742e-05	0.00121009	2.4422
Bcl2a1	-0.818951	0.83022	-5.72527	3.85493e-05	0.00121009	1.76402
Sdhc	-0.19861	7.18679	-5.72369	3.86626e-05	0.00121122	2.31496
Adcy7	0.322201	5.389	5.72225	3.87665e-05	0.00121205	2.39087
Phip	0.265087	6.20887	5.71769	3.9096e-05	0.00121981	2.33477
Elavl2	0.455087	6.74166	5.7988	3.91705e-05	0.00121981	2.33725
RGD1308428	0.267147	5.81626	5.70811	3.97989e-05	0.00123693	2.33869
Rps6kb1	0.334434	5.36775	5.70611	3.99468e-05	0.00123906	2.36283
Snx32	0.278869	5.77464	5.70457	4.00616e-05	0.00124017	2.33472
Arsb	-0.353964	6.40691	-5.70276	4.01967e-05	0.0012419	2.29829
Akap11	0.255236	8.43081	5.6945	4.08194e-05	0.00125865	2.25352
Lmbrd2	0.36154	5.17543	5.69109	4.10791e-05	0.00126417	2.34747
Mrps31	0.273038	4.65531	5.6818	4.17965e-05	0.00127891	2.35836
Nhsl1	-0.304714	4.98681	-5.68127	4.18376e-05	0.00127891	2.34053
Steap3	-0.581781	3.44627	-5.68109	4.18515e-05	0.00127891	2.32702
NEWGENE_1565481	0.293185	4.8191	5.68067	4.18846e-05	0.00127891	2.34861
Crh	0.793934	1.89201	5.67941	4.1983e-05	0.00127942	2.00423
Serpine2	-0.266151	8.50094	-5.67389	4.24167e-05	0.00128152	2.2154
Rab5c	-0.262299	7.32443	-5.6738	4.24241e-05	0.00128152	2.22056
LOC681355	-0.583425	4.41129	-5.69943	4.24308e-05	0.00128152	2.35884
Man1c1	-0.49007	5.42435	-5.72207	4.25999e-05	0.00128152	2.31116
LOC100362814	0.318146	5.9739	5.67151	4.26057e-05	0.00128152	2.26236
Ubn2	0.272881	6.31911	5.67106	4.26413e-05	0.00128152	2.24336
Ptpn11	0.414122	9.04657	5.72298	4.26811e-05	0.00128152	2.2283
RGD1565775	0.282786	5.71894	5.67024	4.27066e-05	0.00128152	2.27501
Metrn	-0.78163	6.09698	-6.11746	4.31973e-05	0.00129119	2.36985
Adam8	0.877928	3.4354	5.76763	4.32478e-05	0.00129119	2.30657
Cox8a	-0.226239	7.4108	-5.66314	4.3276e-05	0.00129119	2.19966
Axl	-0.41168	5.76903	-5.65931	4.35861e-05	0.00129747	2.25234
Kdelr3	-0.997636	1.63384	-5.65772	4.37158e-05	0.00129747	1.90279
Pask	0.547804	2.89142	5.65707	4.37686e-05	0.00129747	2.20103
Cpeb2	0.293916	6.80032	5.65614	4.38453e-05	0.00129747	2.1978
Pigq	-0.295999	6.81037	-5.65546	4.39005e-05	0.00129747	2.19623
NEWGENE_1305560	0.318499	4.51264	5.65159	4.42188e-05	0.00130426	2.30997
Cdc25b	0.360076	5.12251	5.65007	4.43448e-05	0.00130426	2.27604
Scd2	-0.364938	12.5657	-5.64902	4.44322e-05	0.00130426	2.21583
Itgb5	-0.390424	6.52359	-5.64864	4.44635e-05	0.00130426	2.19346
Banf1	-0.401174	5.41515	-5.645	4.47667e-05	0.0013107	2.24839
Spdya	0.613486	2.54553	5.64014	4.51747e-05	0.00132018	2.10178
LOC108350721	0.615062	3.88221	5.63863	4.5303e-05	0.00132146	2.2877
Rsph6a	0.633608	1.39824	5.63213	4.5857e-05	0.00133514	1.80643
Fcer1g	-0.696514	3.95135	-5.68073	4.63652e-05	0.00134743	2.27881
Igfbp5	-1.54989	8.64302	-6.53296	4.67571e-05	0.00135576	2.36705
Acox1	-0.223276	6.64885	-5.62096	4.68249e-05	0.00135576	2.13672
Syt7	0.335536	7.54111	5.61817	4.70697e-05	0.00135827	2.11464
Arhgef19	-0.654895	3.83991	-5.62915	4.70906e-05	0.00135827	2.25194
Ergic3	-0.258509	6.63462	-5.61701	4.71719e-05	0.00135827	2.12999
Chrd	0.502134	2.92748	5.61323	4.75073e-05	0.00136326	2.13709
Sumf2	-0.576611	3.51164	-5.61301	4.75272e-05	0.00136326	2.21881
Aco1	-0.268496	5.85296	-5.61212	4.76063e-05	0.00136326	2.15952
Ifi30	-0.597401	4.18947	-5.62353	4.7788e-05	0.00136441	2.24611
Ryr3	0.288946	5.74275	5.60967	4.78252e-05	0.00136441	2.16193
LOC108351880	0.890999	1.94693	5.60792	4.79822e-05	0.00136441	1.91125
Pde6d	-0.268505	5.29383	-5.60778	4.79947e-05	0.00136441	2.18744
Pdlim4	-0.430442	5.34783	-5.60559	4.8192e-05	0.00136607	2.1806
Slc22a3	-1.05639	4.60748	-6.07768	4.82275e-05	0.00136607	2.32909
Setd1b	0.23458	6.12813	5.60387	4.83476e-05	0.001367	2.12826
Hadhb	-0.31183	7.38073	-5.6007	4.86356e-05	0.00137266	2.08368
Kcnh5	0.620618	3.38396	5.59921	4.87711e-05	0.00137401	2.18161
Dctd	-0.524991	2.6456	-5.59439	4.92143e-05	0.00138401	2.0509
RGD1561413	0.814178	1.24676	5.59252	4.93868e-05	0.00138482	1.7058
Parp4	-0.309396	5.7743	-5.59217	4.94198e-05	0.00138482	2.12764
Macrod2	0.477229	4.70187	5.58907	4.97079e-05	0.0013904	2.18995
Cdon	-0.515486	4.97239	-5.62207	4.99988e-05	0.00139604	2.17909
Nme3	-0.341494	4.49275	-5.58364	5.02167e-05	0.00139963	2.18889
Sh2d5	0.442002	4.53805	5.57956	5.0602e-05	0.00140567	2.18013
Cc2d2a	0.423739	5.32878	5.57945	5.06127e-05	0.00140567	2.1339
Gpatch8	0.281338	6.51242	5.57835	5.07171e-05	0.00140608	2.06261
Rbmx	0.296648	5.92118	5.57663	5.08811e-05	0.0014066	2.08985
Scpep1	-0.44119	5.31638	-5.57627	5.09156e-05	0.0014066	2.1289
Tns3	-0.334082	7.54635	-5.5691	5.16064e-05	0.00142284	2.0228
Mrs2	0.42034	5.3122	5.56829	5.1685e-05	0.00142284	2.11445
Ankrd13d	0.261115	6.19172	5.56411	5.20916e-05	0.00142828	2.05106
Adam17	-0.420767	5.34399	-5.5637	5.21324e-05	0.00142828	2.10378
LOC100910558	-0.374509	4.01941	-5.56346	5.21561e-05	0.00142828	2.1603
Xrn1	0.25868	5.72249	5.56217	5.22819e-05	0.00142922	2.0752
Map3k9	0.356784	6.40864	5.56071	5.24259e-05	0.00143066	2.03448
Map2k4	0.322029	6.28809	5.55948	5.25477e-05	0.00143149	2.03769
Acy1	-0.489259	6.17718	-5.66639	5.28631e-05	0.00143682	2.07224
Vps13d	0.216658	7.51192	5.55565	5.29266e-05	0.00143682	1.99783
Plod3	-0.494783	5.1889	-5.59375	5.31751e-05	0.00144106	2.10679
Atpaf1	0.387241	6.10649	5.53673	5.48444e-05	0.00148155	2.00519
Arfgef3	0.315001	6.87695	5.53587	5.49337e-05	0.00148155	1.9714
LOC102548730	0.590722	3.30403	5.53498	5.50261e-05	0.00148155	2.06409
Pptc7	0.23978	6.72113	5.53477	5.50474e-05	0.00148155	1.9735
LOC108349532	0.735346	2.1911	5.52989	5.55558e-05	0.00148996	1.85162
Tle4	-0.262415	6.35944	-5.52835	5.57169e-05	0.00148996	1.97581
Rnf10	-0.215316	7.64034	-5.52791	5.57637e-05	0.00148996	1.94457
Seli	0.239889	5.63902	5.52779	5.57762e-05	0.00148996	2.01691
Camk4	0.353876	5.60571	5.52722	5.58353e-05	0.00148996	2.01855
Uba1	-0.172473	8.22892	-5.52592	5.59732e-05	0.0014911	1.93823
Uqcrq	-0.340678	6.07508	-5.52172	5.64179e-05	0.0014987	1.97865
Ndrg2	-0.25953	10.8705	-5.52141	5.64502e-05	0.0014987	1.9533
Wnt5b	-0.847999	3.74843	-5.66137	5.68551e-05	0.0015069	2.09554
LOC302022	0.367696	4.20427	5.51638	5.6988e-05	0.00150787	2.07635
Pltp	-0.5755	6.65044	-5.76633	5.73361e-05	0.00151452	2.01554
Csf1r	-0.416769	6.96003	-5.56194	5.7916e-05	0.00152727	1.9347
Zmpste24	-0.238325	6.12872	-5.50466	5.82617e-05	0.00153185	1.94333
Lrp10	-0.545433	5.88825	-5.65671	5.82855e-05	0.00153185	2.00524
Edf1	-0.233353	6.38592	-5.50286	5.84597e-05	0.00153386	1.92672
Carmil3	0.36024	5.94745	5.49993	5.87839e-05	0.00153978	1.94573
Phf20l1	0.359679	5.41563	5.49533	5.92974e-05	0.00154657	1.97235
Rassf2	-0.379429	7.17553	-5.50899	5.93401e-05	0.00154657	1.89308
Zfand3	-0.196262	6.35371	-5.49451	5.93891e-05	0.00154657	1.91248
Smim20	-0.348811	4.58863	-5.49407	5.94378e-05	0.00154657	2.0229
LOC100910827	0.348183	9.20791	5.48906	6.00035e-05	0.00155622	1.87328
Msx2	-0.658361	2.18445	-5.48826	6.00935e-05	0.00155622	1.7856
Zc3h6	0.392065	4.48503	5.48815	6.01067e-05	0.00155622	2.0172
Scg2	0.386942	9.79668	5.50548	6.08384e-05	0.00156958	1.87303
LOC365085	0.436032	3.45929	5.48073	6.09548e-05	0.00156958	1.98879
Khdrbs3	-0.265067	6.11148	-5.48048	6.09844e-05	0.00156958	1.89912
Nfrkb	0.41655	5.58204	5.48014	6.10235e-05	0.00156958	1.93303
Adgre1	-0.800755	3.47736	-5.54667	6.14459e-05	0.00157315	1.99196
Zfp207	0.20372	7.11543	5.47649	6.1446e-05	0.00157315	1.85443
Lnp	0.289952	5.74953	5.47525	6.159e-05	0.00157315	1.91192
Fyttd1	0.25546	7.04027	5.47474	6.16494e-05	0.00157315	1.85265
Cpne9	0.81037	5.01198	5.81711	6.16644e-05	0.00157315	2.05564
Scn8a	0.484092	7.90501	5.62267	6.18989e-05	0.00157618	1.88804
Paqr7	-0.349534	6.63354	-5.47187	6.19847e-05	0.00157618	1.85872
Apbb3	0.259292	5.8939	5.46639	6.2631e-05	0.0015873	1.88593
LOC100363361	0.242254	5.57584	5.466	6.26767e-05	0.0015873	1.9063
Usp33	0.223511	7.44717	5.46536	6.27525e-05	0.0015873	1.8287
Ccdc8	-0.458761	3.24636	-5.46473	6.28271e-05	0.0015873	1.93939
Gng5	-0.381417	4.35889	-5.46277	6.30605e-05	0.00159063	1.9762
Glra4	-1.29299	5.59236	-6.18162	6.34948e-05	0.00159901	2.09241
LOC102548359	0.477281	2.61894	5.45603	6.38708e-05	0.0016059	1.82395
Amfr	-0.164826	8.26412	-5.45443	6.40645e-05	0.00160818	1.8035
Kcnq2	0.292418	8.07787	5.45238	6.43135e-05	0.00161185	1.79995
Stat5a	-0.541766	4.12773	-5.4515	6.44212e-05	0.00161193	1.96162
Pdpn	-0.84659	4.81247	-5.79233	6.46181e-05	0.00161193	2.02046
Tnrc6a	0.222107	7.22	5.44982	6.46254e-05	0.00161193	1.8024
Arl4c	0.27977	5.79733	5.44586	6.51122e-05	0.00162149	1.85386
Grm5	0.314587	5.72402	5.44283	6.54872e-05	0.00162661	1.85318
Dad1	-0.274953	5.86163	-5.44252	6.55256e-05	0.00162661	1.84331
Foxred1	0.282746	5.63356	5.43962	6.58873e-05	0.00163216	1.85329
Cyb5a	-0.277204	5.40279	-5.43829	6.60528e-05	0.00163216	1.86692
Gabbr1	-0.318178	9.92546	-5.43822	6.60615e-05	0.00163216	1.78453
Ttc3	0.256533	9.71413	5.4354	6.64162e-05	0.00163411	1.77677
LOC691807	-0.218623	6.32979	-5.43515	6.64479e-05	0.00163411	1.8022
Rbm25	0.238501	6.02361	5.43491	6.64775e-05	0.00163411	1.81883
Mgll	-0.309981	7.18805	-5.43428	6.6558e-05	0.00163411	1.77367
Dchs1	-0.423473	5.93761	-5.46134	6.68773e-05	0.00163938	1.82853
Aldh4a1	-0.417752	5.22684	-5.43072	6.70083e-05	0.00164003	1.86605
Trnd	0.739521	3.56878	5.4768	6.71736e-05	0.00164151	1.91545
Gsdmd	-0.65876	3.44181	-5.4284	6.7304e-05	0.00164213	1.89625
Nnat	-0.724731	9.2994	-5.86887	6.77346e-05	0.00165007	1.89184
Rims2	0.306457	5.46038	5.41897	6.85182e-05	0.00166657	1.82698
Jmy	0.213956	6.26422	5.41673	6.88111e-05	0.00166869	1.77089
LOC102547266	0.588196	2.27888	5.41667	6.88183e-05	0.00166869	1.69383
Dcx	0.285203	5.18724	5.41171	6.94692e-05	0.00168186	1.83301
Htt	0.189169	7.52506	5.41039	6.96437e-05	0.00168349	1.72392
Sidt1	0.290505	4.78528	5.40851	6.98938e-05	0.00168444	1.85493
Dock8	-0.705198	3.76302	-5.45885	6.98982e-05	0.00168444	1.8908
Fzd1	-0.554844	4.63918	-5.45355	7.01429e-05	0.00168678	1.87454
Tmed10	-0.234797	6.84157	-5.40594	7.02347e-05	0.00168678	1.72734
Tanc2	0.288873	7.67296	5.40532	7.03184e-05	0.00168678	1.71304
Kdm4c	0.363019	4.26526	5.40262	7.068e-05	0.00169021	1.87064
Atl2	0.248806	5.94326	5.40166	7.08088e-05	0.00169021	1.76139
Prrt2	0.348209	6.92003	5.40124	7.08657e-05	0.00169021	1.7168
Cd38	-0.270743	5.08274	-5.40104	7.08929e-05	0.00169021	1.82059
C1galt1c1	-0.307791	4.92028	-5.39886	7.11864e-05	0.00169331	1.82813
Ltbp3	-0.323745	6.50253	-5.39847	7.12393e-05	0.00169331	1.72538
Clptm1	-0.18827	7.94576	-5.39385	7.18684e-05	0.00170568	1.68947
Cyp2j4	-0.727512	1.41748	-5.39262	7.2036e-05	0.00170707	1.46289
Camk2d	0.266989	7.33783	5.39018	7.23714e-05	0.00171166	1.68788
Bmpr2	0.221818	8.13202	5.38932	7.24897e-05	0.00171166	1.68035
Mxd4	-0.451765	6.41434	-5.47701	7.26439e-05	0.00171166	1.74003
Tufm	-0.319338	6.23673	-5.38804	7.26669e-05	0.00171166	1.7186
Arfip2	0.221286	6.2101	5.38718	7.27847e-05	0.00171186	1.71815
Sox6	-0.38069	4.99321	-5.38522	7.30564e-05	0.00171482	1.79818
Ggta1	-0.672372	3.49158	-5.3847	7.31297e-05	0.00171482	1.82468
Zcchc2	0.331811	4.69512	5.37818	7.40426e-05	0.00173202	1.80509
Calr	-0.551698	8.87017	-5.62913	7.4084e-05	0.00173202	1.74354
Psd3	0.318314	7.79807	5.37238	7.48646e-05	0.00174766	1.64966
Cox20	-0.319518	4.33103	-5.37016	7.51819e-05	0.00175131	1.80941
RGD1304884	0.264065	8.74008	5.36952	7.52731e-05	0.00175131	1.64407
Wif1	-1.27054	6.13504	-6.10131	7.53566e-05	0.00175131	1.90697
Gas2	0.398946	3.55968	5.36548	7.58544e-05	0.00176027	1.79691
Esyt2	0.257013	6.42549	5.3641	7.60544e-05	0.0017623	1.66359
Aloxe3	0.536983	3.47774	5.36316	7.61903e-05	0.00176284	1.78696
Ndufa11	-0.260432	6.35493	-5.36207	7.63486e-05	0.0017639	1.66317
Pusl1	0.266622	4.52225	5.35593	7.72482e-05	0.00178206	1.77424
Coro6	0.596603	5.66658	5.55923	7.79425e-05	0.00179543	1.75193
Mtr	0.28411	5.04857	5.34941	7.82137e-05	0.0017964	1.72728
Hdac1	-0.271851	5.49803	-5.34941	7.82139e-05	0.0017964	1.69399
Abcb1a	0.573329	5.5871	5.51758	7.85809e-05	0.00180218	1.73787
Rnaset2	-0.450053	5.54398	-5.38354	7.91124e-05	0.00181172	1.69313
Dhx36	0.206905	6.77401	5.34153	7.93989e-05	0.00181525	1.60714
Cyp7b1	-0.513482	4.69271	-5.36289	7.96172e-05	0.00181525	1.74258
LOC103693584	0.343956	5.45837	5.33969	7.96775e-05	0.00181525	1.67903
Rnasel	0.359231	4.97649	5.33872	7.98247e-05	0.00181525	1.71308
LOC102547720	0.822205	1.11448	5.33839	7.98752e-05	0.00181525	1.30629
Acsf3	-0.454708	4.64966	-5.33783	7.99618e-05	0.00181525	1.73427
LOC108349040	0.685779	2.00867	5.33616	8.02158e-05	0.00181783	1.51105
Grm1	0.347256	5.0892	5.33556	8.03076e-05	0.00181783	1.69884
Ubl5	-0.217649	6.25518	-5.33454	8.04645e-05	0.00181875	1.61609
Tmprss7	0.647839	3.04973	5.33346	8.06314e-05	0.0018199	1.69161
Kdelr1	-0.260745	5.95112	-5.32791	8.14903e-05	0.00183664	1.62185
Entpd4	0.225457	6.70933	5.3262	8.1756e-05	0.0018381	1.58016
Sh3bgrl	-0.397339	7.42708	-5.37583	8.18201e-05	0.0018381	1.58196
Acvr1b	0.345949	5.62595	5.32524	8.19073e-05	0.0018381	1.63964
Fam198b	-0.913889	3.74836	-5.5282	8.20949e-05	0.00183968	1.77019
Timp4	-0.292887	5.7398	-5.32261	8.23194e-05	0.00184207	1.6262
Gfod1	0.358829	6.54681	5.32065	8.26275e-05	0.00184377	1.57633
Scn2a	0.340766	7.39118	5.32063	8.26305e-05	0.00184377	1.55513
Fkbp4	-0.324748	7.81812	-5.31822	8.30129e-05	0.00184549	1.54647
Arl6ip4	0.338791	5.59033	5.31799	8.30486e-05	0.00184549	1.62857
Med16	-0.248554	5.65375	-5.31783	8.30752e-05	0.00184549	1.6232
Bcap31	-0.228133	6.63019	-5.31556	8.34356e-05	0.00184549	1.5627
Adora1	0.370628	6.89958	5.32764	8.35825e-05	0.00184549	1.55754
Tp53inp2	-0.330249	8.28158	-5.31441	8.36193e-05	0.00184549	1.53786
Mthfd1	-0.202045	6.05069	-5.31427	8.36421e-05	0.00184549	1.58953
Ccdc62	0.461095	3.64993	5.31422	8.36501e-05	0.00184549	1.71133
Nova1	0.290106	6.82611	5.31303	8.38408e-05	0.00184709	1.55164
Slc7a5	0.397118	6.22883	5.33364	8.41464e-05	0.00185122	1.58164
Nxpe3	0.266414	5.10543	5.30945	8.44158e-05	0.00185279	1.64856
Fat1	-0.342305	7.48951	-5.30921	8.44541e-05	0.00185279	1.53217
Snhg11	0.77145	9.09767	5.78831	8.47864e-05	0.00185747	1.68247
Twist1	-0.826143	0.879607	-5.30381	8.53309e-05	0.00186058	1.19564
Eif2b1	-0.253947	4.40963	-5.30377	8.53383e-05	0.00186058	1.68464
Golga1	0.274547	5.50766	5.30362	8.5363e-05	0.00186058	1.60732
Tpt1	-0.237567	9.03257	-5.30337	8.54033e-05	0.00186058	1.51989
Wfs1	-0.304034	4.61509	-5.3017	8.56769e-05	0.00186395	1.66913
Rab3gap2	0.225034	6.96031	5.29828	8.62392e-05	0.0018718	1.5199
RGD1562114	-0.55682	2.10846	-5.29805	8.62769e-05	0.0018718	1.47213
Pgbd1	0.781399	1.09321	5.29629	8.65686e-05	0.00187553	1.24031
Arhgap8	-0.846106	2.3168	-5.29528	8.67352e-05	0.00187655	1.50879
Nfxl1	0.377479	4.63081	5.2937	8.69985e-05	0.00187965	1.65379
LOC103691005	0.326787	5.17509	5.29226	8.72393e-05	0.00188125	1.61138
Aldh2	-0.568306	6.8638	-5.55296	8.73128e-05	0.00188125	1.59855
LOC102556093	0.417153	4.61019	5.28868	8.78378e-05	0.00188996	1.64607
Tomm6	-0.231116	5.87295	-5.28733	8.80664e-05	0.00189089	1.55015
Fam163a	0.395626	4.88891	5.2868	8.81548e-05	0.00189089	1.6232
Syde2	0.713021	4.66741	5.48811	8.82432e-05	0.00189089	1.69558
Ndufs8	-0.22535	6.07435	-5.2845	8.85445e-05	0.0018945	1.53172
Optn	0.243753	7.11618	5.2837	8.86795e-05	0.0018945	1.48886
Arhgef6	0.265287	4.98861	5.28303	8.87937e-05	0.0018945	1.60805
Slc25a48	0.938834	1.30257	5.28182	8.9e-05	0.0018945	1.26888
Emc3	-0.219323	6.71576	-5.28135	8.90796e-05	0.0018945	1.4945
Scd	-0.846292	6.67723	-5.79926	8.91374e-05	0.0018945	1.6631
Serp1	-0.37219	6.32681	-5.27681	8.98594e-05	0.00190502	1.50328
Bet1	-0.268787	5.12923	-5.27671	8.98757e-05	0.00190502	1.58547
LOC102552369	0.422269	3.66348	5.2739	9.03606e-05	0.00190893	1.64075
Mllt1	-0.295479	5.571	-5.27288	9.05374e-05	0.00190893	1.54468
Cops9	-0.249364	5.63028	-5.27287	9.05392e-05	0.00190893	1.54011
LOC100909824	0.345346	3.77686	5.27274	9.05627e-05	0.00190893	1.64167
Dbi	-0.416412	8.12366	-5.35553	9.06694e-05	0.00190893	1.48668
Por	-0.216895	6.74012	-5.27029	9.0989e-05	0.00191309	1.47258
Ost4	-0.41042	5.1237	-5.26893	9.12263e-05	0.00191551	1.57204
Igsf1	-0.367279	6.91721	-5.27773	9.19226e-05	0.00192754	1.46231
Tbc1d15	0.232749	5.59648	5.26254	9.23507e-05	0.00193342	1.52306
Calu	-0.260508	6.82826	-5.26199	9.24494e-05	0.00193342	1.45413
Ppp2r3a	0.261542	5.79507	5.25903	9.2976e-05	0.00194183	1.50211
Ankrd26	0.348143	4.92539	5.25805	9.31507e-05	0.00194289	1.5666
Slc26a6	0.347266	3.9289	5.2555	9.36076e-05	0.00194762	1.61165
Braf	0.253324	6.51653	5.25539	9.36262e-05	0.00194762	1.45285
Map4k2	0.319159	6.70404	5.25352	9.39633e-05	0.00194998	1.4422
Mbd3	-0.258403	6.36258	-5.25338	9.39883e-05	0.00194998	1.45633
Tomm7	-0.329445	5.33519	-5.25073	9.44676e-05	0.00195652	1.52101
Trappc6a	-0.622507	2.90457	-5.25026	9.45532e-05	0.00195652	1.53213
Spg20	-0.230879	6.23259	-5.24806	9.49543e-05	0.00196222	1.45308
Hhatl	-0.653554	4.93337	-5.43026	9.5097e-05	0.00196258	1.60227
Chrm2	0.534036	4.14919	5.24566	9.53928e-05	0.0019661	1.59015
Dmpk	-0.406153	6.28755	-5.28847	9.55529e-05	0.00196681	1.45979
Adam22	0.26915	7.86166	5.24248	9.59767e-05	0.00197294	1.40142
Hist1h2bh	-0.86216	5.37011	-5.66211	9.61537e-05	0.00197399	1.63058
Rell1	-0.474958	3.41947	-5.24021	9.63952e-05	0.00197635	1.56918
Cyp4x1	0.404424	4.09501	5.23871	9.66748e-05	0.00197818	1.57873
Caln1	0.539921	5.58015	5.37374	9.67371e-05	0.00197818	1.52438
Zmat1	0.251656	5.12298	5.23705	9.69827e-05	0.00198062	1.51158
Colgalt1	-0.255135	4.90873	-5.23369	9.76117e-05	0.0019895	1.52184
Echdc1	-0.279907	5.6433	-5.23337	9.76717e-05	0.0019895	1.46453
Fam13c	0.305178	5.52105	5.23238	9.78574e-05	0.00199025	1.47204
Limd2	-0.541117	4.78669	-5.29429	9.80042e-05	0.00199025	1.54764
Lancl3	0.529415	1.853	5.23096	9.81243e-05	0.00199025	1.31639
Ctsh	-0.649826	6.0584	-5.53743	9.82167e-05	0.00199025	1.53266
Pcgf6	0.405111	3.60833	5.22855	9.85798e-05	0.00199503	1.55858
Rbm11	0.67731	3.477	5.23636	9.94695e-05	0.00201044	1.54569
Elavl4	0.241527	7.01423	5.22137	9.99497e-05	0.00201754	1.37177
Ccnt2	0.308565	6.62553	5.21949	0.000100313	0.00202228	1.38002
Ctif	0.323939	5.21796	5.21762	0.000100675	0.00202696	1.46789
Cep350	0.238496	6.23092	5.21412	0.000101355	0.0020362	1.38852
Gigyf1	0.302248	6.53318	5.21392	0.000101394	0.0020362	1.37309
Snx4	0.310637	5.95358	5.20656	0.00010284	0.00206259	1.39172
Rnf5	-0.271418	5.93845	-5.20543	0.000103064	0.00206444	1.39036
Slc25a20	-0.254327	5.19728	-5.20301	0.000103546	0.00207145	1.44161
Pragmin	-0.438044	4.10965	-5.20078	0.000103992	0.00207224	1.50938
Dusp3	0.605075	8.09644	5.51836	0.000104045	0.00207224	1.42955
Pdia3	-0.303765	8.2989	-5.20021	0.000104105	0.00207224	1.31925
Timm13	-0.247765	5.23349	-5.20016	0.000104115	0.00207224	1.43338
Zfp61	0.505766	5.2852	5.27904	0.000104772	0.00207766	1.45131
Iffo1	0.392834	6.0727	5.21612	0.000104972	0.00207766	1.3711
Pja2	0.276179	9.55424	5.19542	0.00010507	0.00207766	1.31792
Jam2	-0.346973	6.75913	-5.19495	0.000105165	0.00207766	1.32833
Eci2	-0.250157	5.49624	-5.19478	0.0001052	0.00207766	1.40246
Tro	0.242724	6.28914	5.19472	0.000105212	0.00207766	1.3482
Glud1	-0.251037	9.57226	-5.19421	0.000105315	0.00207766	1.31577
LOC103693391	-0.500819	2.59877	-5.19262	0.000105639	0.00208009	1.39039
Mrpl34	-0.36749	4.11053	-5.1923	0.000105704	0.00208009	1.49374
Ubash3b	0.330186	5.99975	5.18656	0.000106881	0.0021006	1.35057
Abcc9	0.723929	4.44514	5.36266	0.000107242	0.00210506	1.5151
Asns	0.231704	6.02358	5.18168	0.000107889	0.00211299	1.33928
Tmem196	0.331129	5.38184	5.18156	0.000107916	0.00211299	1.3868
Ccser2	0.239629	7.29904	5.17634	0.000109007	0.00213169	1.28011
Vstm4	-0.783304	3.33118	-5.23538	0.000109316	0.00213507	1.45842
Creb3l1	-0.642896	3.28072	-5.16985	0.00011038	0.00215316	1.43567
Slc7a1	0.43104	6.23616	5.23597	0.000111501	0.00217233	1.31976
Tbc1d10a	-0.301697	3.88475	-5.16017	0.000112464	0.00218336	1.44
Irf5	-0.442067	3.27097	-5.1597	0.000112565	0.00218336	1.41804
Lactb	-0.385488	3.56124	-5.15965	0.000112577	0.00218336	1.43476
Mbd5	0.237849	5.63522	5.15943	0.000112625	0.00218336	1.32459
Pcdhgb7	-0.414755	3.40062	-5.15826	0.000112879	0.00218559	1.42455
Ddx3	0.187669	6.80304	5.15062	0.000114557	0.00221533	1.24131
Atp6v1b2	0.25449	9.15886	5.14721	0.000115313	0.00222721	1.22147
Slc35f6	-0.290464	5.56481	-5.14551	0.000115694	0.00223002	1.30369
Dars	-0.244698	6.03218	-5.14529	0.000115744	0.00223002	1.26913
LOC102553495	-0.606015	3.64435	-5.14374	0.000116089	0.00223393	1.40853
Tef	0.272303	7.36649	5.14183	0.000116519	0.00223945	1.21275
Rhoa	-0.198959	8.19011	-5.14042	0.000116838	0.00224111	1.20408
Bclaf1	0.231738	7.45339	5.14018	0.000116891	0.00224111	1.20841
Oaf	-0.46381	3.53913	-5.13909	0.000117138	0.0022431	1.3973
Hif3a	1.44542	1.13511	5.28274	0.000117427	0.00224588	1.00037
Tspan6	-0.308986	5.45092	-5.13573	0.000117901	0.00225039	1.29414
Gnl2	0.269489	5.55764	5.13552	0.00011795	0.00225039	1.2852
Atp1a2	-0.311727	11.5443	-5.13395	0.000118308	0.00225448	1.22816
Adgra3	-0.286346	4.96859	-5.12936	0.000119363	0.00226727	1.32148
Myo5a	0.285275	8.43216	5.1293	0.000119377	0.00226727	1.18292
Cdc25c	0.569286	1.92662	5.12915	0.000119414	0.00226727	1.17066
Fam20c	-0.282885	6.15722	-5.12723	0.000119856	0.00227292	1.22671
Gpr165	0.515984	4.88994	5.18279	0.000120148	0.0022757	1.34119
Polr3k	-0.390078	5.31734	-5.12449	0.000120495	0.0022795	1.28409
Acot2	-0.401896	3.59001	-5.12353	0.000120719	0.00228098	1.3714
Zgpat	0.302988	4.89101	5.12205	0.000121065	0.00228329	1.31415
Rassf5	0.330966	5.25745	5.12169	0.000121148	0.00228329	1.28344
Pex13	-0.229455	4.30847	-5.12114	0.000121278	0.00228329	1.35395
Rplp0	-0.251934	8.04423	-5.11876	0.000121839	0.00228954	1.1626
LOC102555866	0.628127	3.5653	5.11849	0.000121902	0.00228954	1.36116
Micu3	0.281964	6.74277	5.1171	0.00012223	0.00229295	1.17906
Ccdc124	-0.263659	5.67903	-5.11568	0.000122568	0.00229489	1.23782
Sav1	-0.282917	4.54305	-5.11543	0.000122626	0.00229489	1.32849
Pno1	-0.259386	4.35893	-5.11406	0.000122953	0.00229824	1.33797
Mvp	-0.536408	4.91862	-5.19167	0.000123782	0.00230976	1.31778
Cabp7	0.756415	5.78045	5.48874	0.000123864	0.00230976	1.34746
Klhl11	0.338545	6.12477	5.10729	0.000124574	0.00232023	1.19079
Ulk1	0.216674	6.67987	5.106	0.000124887	0.00232023	1.15961
Tmem176b	-0.475201	6.18974	-5.22545	0.000124949	0.00232023	1.2271
Hspe1	-0.238646	5.34804	-5.10546	0.000125017	0.00232023	1.24468
Pstk	0.319522	4.2202	5.09826	0.000126774	0.00235005	1.31667
Usp13	0.24047	6.25824	5.0932	0.000128024	0.00237042	1.15518
Ccnl1	0.295909	4.93528	5.0899	0.000128847	0.00238247	1.24989
Zfc3h1	0.282788	6.48886	5.08937	0.000128979	0.00238247	1.13589
Aif1	-0.542648	4.05072	-5.08756	0.000129434	0.00238805	1.30471
Pard3b	-0.453384	2.65021	-5.08607	0.000129807	0.0023907	1.22103
Aak1	0.244236	8.64073	5.08577	0.000129883	0.0023907	1.09953
Rpn1	-0.235154	7.77623	-5.08422	0.000130276	0.00239511	1.09725
Mmgt2	-0.381626	4.12055	-5.0827	0.000130659	0.00239643	1.29272
Kcna2	0.410648	9.12631	5.16722	0.000130668	0.00239643	1.12814
Luc7l	0.180725	6.91053	5.08212	0.000130806	0.00239643	1.1062
Abcd1	-0.439855	4.21288	-5.08072	0.000131161	0.00240013	1.28505
Jmjd7	0.561463	2.21451	5.07836	0.000131765	0.00240837	1.14051
Slc25a27	0.345678	5.74698	5.07733	0.000132029	0.00241037	1.15971
Dbn1	0.206894	7.02666	5.075	0.000132627	0.00241848	1.08968
Gdf11	-0.248228	6.76548	-5.07178	0.000133459	0.00242954	1.09065
Dusp18	-0.320343	5.47634	-5.07145	0.000133544	0.00242954	1.16967
Adgrl2	0.449857	6.40272	5.17321	0.000134076	0.00243639	1.14042
Tiparp	-0.489178	4.73067	-5.09304	0.000134628	0.00244002	1.2335
Rpap3	0.193054	6.0546	5.06702	0.000134698	0.00244002	1.11732
Fam227a	0.961733	4.4081	5.42207	0.000134743	0.00244002	1.34788
Kif7	-0.491858	3.67027	-5.06165	0.000136111	0.00246194	1.26202
Casr	-1.03363	3.7547	-5.34962	0.000136452	0.00246333	1.32305
Slc39a7	-0.188099	6.3703	-5.05979	0.000136603	0.00246333	1.08438
Dok6	0.324452	4.76804	5.05958	0.000136659	0.00246333	1.20669
Zfp597	0.353223	4.43119	5.05577	0.000137676	0.00247684	1.22538
Chkb	0.249317	4.97224	5.05558	0.000137725	0.00247684	1.18167
Arhgap18	0.279804	4.24103	5.05271	0.000138497	0.00248522	1.23125
Scn1a	0.512335	8.08963	5.26603	0.00013853	0.00248522	1.11307
Rap1b	-0.28568	6.61025	-5.05208	0.000138667	0.00248522	1.05851
Ptgr2	-0.304699	6.48758	-5.04988	0.00013926	0.00249025	1.05979
Pttg1ip	-0.421525	6.78094	-5.13683	0.000139289	0.00249025	1.08073
Slco4a1	0.569894	2.04578	5.04928	0.000139425	0.00249025	1.06456
Ctsa	-0.216069	7.32809	-5.04839	0.000139664	0.00249169	1.03266
Prelid3b	-0.23411	5.3956	-5.04668	0.00014013	0.00249375	1.12866
Atp5d	-0.221337	7.34981	-5.04573	0.000140388	0.00249375	1.0272
Bambi	-0.751861	3.05481	-5.06835	0.000140532	0.00249375	1.20291
Lmf2	-0.403045	5.14867	-5.04516	0.000140545	0.00249375	1.14759
Atxn7l3	0.248655	7.53488	5.04459	0.000140702	0.00249375	1.02272
Abcc8	0.277877	5.21939	5.04416	0.000140818	0.00249375	1.13899
U2surp	0.22077	6.78017	5.04388	0.000140894	0.00249375	1.03617
Rps29	-0.274161	6.95153	-5.04329	0.000141059	0.00249384	1.03019
Sgip1	0.216668	7.71292	5.04251	0.000141272	0.00249481	1.01696
Eny2	0.284135	6.06723	5.04162	0.000141515	0.00249628	1.06796
Rnf157	0.337616	7.95407	5.04484	0.000141681	0.00249639	1.01412
Serpina1	0.818782	0.407606	5.03646	0.000142945	0.0025139	0.695454
Stxbp5l	0.342973	5.77945	5.03628	0.000142996	0.0025139	1.07845
LOC108351553	0.853529	1.21148	5.0353	0.000143267	0.00251584	0.880667
Emp2	-0.704229	2.52263	-5.03414	0.000143593	0.00251828	1.1158
Clvs2	0.438259	3.48887	5.03361	0.00014374	0.00251828	1.20778
Gnai2	-0.304705	8.36655	-5.03308	0.000143888	0.00251828	0.996606
Lman1	-0.295005	6.09843	-5.03009	0.000144728	0.00252843	1.04362
LOC108350352	0.699282	0.871067	5.02987	0.000144791	0.00252843	0.797944
Clk1	0.416197	6.85455	5.11266	0.000145128	0.00253149	1.03669
Neo1	-0.211731	7.46398	-5.02665	0.0001457	0.00253781	0.988682
Epb41l2	-0.298087	7.18319	-5.0259	0.000145914	0.00253781	0.991572
Aprt	-0.245305	4.78694	-5.0252	0.000146114	0.00253781	1.1398
Plin4	1.2611	2.19262	5.2113	0.000146138	0.00253781	1.06091
Tia1	0.313853	5.48737	5.02246	0.000146894	0.00254553	1.0751
Etfdh	-0.351961	5.5087	-5.02242	0.000146908	0.00254553	1.07339
Rras2	-0.47894	4.03443	-5.02171	0.000147109	0.00254621	1.18424
Baz2b	0.301875	6.362	5.01904	0.000147877	0.00255668	1.00659
Jun	-0.259188	6.12855	-5.01832	0.000148084	0.00255742	1.01877
Mob1a	-0.255315	5.15565	-5.0167	0.000148552	0.00255815	1.09193
Brsk2	0.259558	6.2201	5.01661	0.000148578	0.00255815	1.00987
Mir186	0.752709	1.42229	5.01648	0.000148616	0.00255815	0.896686
Vamp1	0.425519	10.0294	5.11189	0.000149035	0.00256256	1.01206
Myo1f	-0.472464	3.06546	-5.00965	0.000150608	0.00258462	1.13952
Lrpprc	0.180245	7.18853	5.0088	0.000150858	0.00258462	0.958127
Tpp1	-0.331705	7.09979	-5.00842	0.00015097	0.00258462	0.959334
Ppp4r4	0.331722	4.25286	5.00768	0.000151188	0.00258462	1.14718
Sash1	-0.345515	7.25946	-5.01941	0.000151355	0.00258462	0.958606
Pbld2	0.758719	2.553	5.00671	0.000151474	0.00258462	1.07413
Cry2	0.265957	6.86032	5.006	0.000151684	0.00258462	0.960451
Cdk5	0.20395	6.05582	5.00493	0.000152002	0.00258462	0.997591
Vgf	0.525733	6.73493	5.21432	0.000152214	0.00258462	1.03959
Egfem1	0.630644	2.6053	5.00419	0.000152221	0.00258462	1.07693
Trnr	0.674761	3.07824	5.00384	0.000152322	0.00258462	1.12965
Krit1	0.234878	5.63928	5.00356	0.000152407	0.00258462	1.02608
Ubap1l	0.702569	2.64866	5.00337	0.000152463	0.00258462	1.08111
Wt1	-1.17064	5.0579	-5.53651	0.000153252	0.00259519	1.24146
Anxa5	-0.326535	6.66088	-4.99934	0.000153667	0.0025994	0.954495
Mmp16	0.224837	5.61072	4.99812	0.000154031	0.00259952	1.01789
Me2	-0.342093	5.75706	-4.99767	0.000154169	0.00259952	1.00581
Vcpip1	0.260706	5.89301	4.99766	0.000154172	0.00259952	0.995252
Yap1	-0.579457	6.62945	-5.26108	0.000155378	0.00261562	1.04349
Inpp5d	-0.44167	4.04819	-4.99339	0.000155461	0.00261562	1.13143
Pdlim5	-0.336529	5.94884	-4.98994	0.000156512	0.00263025	0.976622
Pkig	-0.315736	5.14277	-4.98943	0.000156666	0.00263025	1.04136
Sat1	0.371394	6.03661	4.9984	0.000157047	0.00263382	0.971164
Tmem132b	0.640704	4.58971	5.12228	0.000158255	0.00265124	1.12481
Csf3r	-0.589861	2.56526	-4.98013	0.000159536	0.00266985	1.03121
Camta1	0.25232	8.69316	4.97925	0.000159812	0.00267161	0.893068
Rb1cc1	0.203309	7.0033	4.97861	0.000160012	0.00267209	0.903333
Slc30a3	0.447783	5.0538	5.00174	0.000160453	0.00267553	1.03542
LOC108351061	1.95175	1.61731	5.34998	0.000160559	0.00267553	0.856136
Zfp277	-0.304656	3.82582	-4.97507	0.000161123	0.00267641	1.1043
Gria1	-0.442072	7.13337	-5.09274	0.000161175	0.00267641	0.938629
Epha6	0.483765	4.74828	5.00549	0.000161248	0.00267641	1.05937
Narf	0.208948	5.83453	4.97452	0.000161295	0.00267641	0.954755
Zfp141	0.72331	4.01907	5.09302	0.00016185	0.00268006	1.12836
Lrp1b	0.259627	5.84295	4.97219	0.000162031	0.00268006	0.949795
Fam214a	0.289833	5.88827	4.97176	0.000162168	0.00268006	0.945754
Lamtor4	-0.244302	5.02371	-4.97166	0.0001622	0.00268006	1.01758
Shroom3	-0.586454	4.05073	-5.00794	0.000162892	0.00268865	1.09863
Flrt1	-0.270073	5.55376	-4.96538	0.000164202	0.00270473	0.959725
Abhd14b	-0.481015	5.03565	-5.01371	0.000164211	0.00270473	1.02279
Clybl	-0.564713	3.90701	-4.96924	0.00016507	0.00271368	1.08196
LOC102550291	0.400146	3.46904	4.96259	0.000165101	0.00271368	1.08021
Lrrc55	-0.618728	5.88463	-5.22124	0.000166471	0.00273333	1.01576
Adgrl4	0.487572	4.01502	4.9574	0.000166785	0.00273534	1.06657
Tor3a	-0.444227	3.50657	-4.95621	0.000167173	0.00273534	1.06966
Golm1	-0.342709	5.32487	-4.95588	0.000167281	0.00273534	0.961341
Dusp19	-0.499164	3.94611	-4.95547	0.000167416	0.00273534	1.06553
Necap2	-0.448832	5.37674	-5.00135	0.000167466	0.00273534	0.972953
Mtf2	0.368008	4.66581	4.95422	0.000167825	0.00273835	1.01661
Dennd1c	0.478435	2.31329	4.95364	0.000168017	0.00273862	0.951553
Epha10	0.334023	5.96798	4.9504	0.000169084	0.00274936	0.898871
Synm	-0.385748	6.01054	-4.97741	0.000169146	0.00274936	0.906006
Ubp1	0.182781	6.3893	4.95004	0.000169202	0.00274936	0.870919
Ada	-0.708581	1.9092	-4.94921	0.000169477	0.00275097	0.880189
Cnr1	0.331172	6.86414	4.94281	0.000171615	0.00278279	0.837726
Bcar1	-0.233659	6.40964	-4.94226	0.000171799	0.00278289	0.85481
Myl6	-0.209773	7.9728	-4.94006	0.000172541	0.00279202	0.815996
Acot1	-0.616092	2.11229	-4.93845	0.000173084	0.00279793	0.895983
Pcdh12	-0.728396	0.648213	-4.93722	0.000173504	0.00280013	0.610814
Ric1	0.193052	5.86867	4.93664	0.0001737	0.00280013	0.878902
Ttc14	0.349518	5.7814	4.93646	0.00017376	0.00280013	0.885942
Rbfox2	0.253485	5.94438	4.93595	0.000173935	0.00280013	0.872208
Ighv	-1.03796	1.1412	-4.94486	0.000174121	0.00280024	0.712699
LOC100911237	0.868824	1.02001	4.93364	0.000174722	0.00280637	0.6864
Tf	-0.568765	10.4395	-5.19548	0.000174861	0.00280637	0.919934
Pitpnm3	0.328888	6.32818	4.93154	0.000175443	0.00281283	0.838978
Jup	-0.30849	6.08008	-4.9293	0.000176216	0.00281948	0.849945
Asap2	0.236911	6.85629	4.92909	0.000176288	0.00281948	0.810916
Tgfbi	-0.751564	4.61629	-5.17065	0.000176422	0.00281948	1.05113
RGD1561251	0.512065	1.9357	4.92817	0.000176604	0.00281948	0.851411
Txn2	-0.256809	6.06044	-4.92773	0.000176757	0.00281948	0.848035
Eml2	0.340123	7.81129	4.94384	0.000177007	0.00282039	0.798278
Shisa4	-0.335496	6.71891	-4.92653	0.000177175	0.00282039	0.81081
Ndst1	-0.201773	7.38765	-4.92406	0.000178035	0.0028312	0.790006
Ift27	-0.28662	4.09655	-4.92354	0.000178215	0.0028312	0.999403
Ldah	-0.308739	5.18377	-4.92288	0.000178447	0.00283201	0.910317
Dhrs3	-0.478772	4.42506	-4.92157	0.000178903	0.00283637	0.975168
Gemin8	-0.268108	4.23988	-4.92105	0.000179088	0.00283643	0.98625
Bpgm	-0.179047	6.62791	-4.91969	0.000179564	0.00284111	0.800413
Gnb2	-0.220668	7.58561	-4.91747	0.000180346	0.0028506	0.774799
Scyl3	0.270282	4.30149	4.91159	0.000182438	0.00288076	0.964453
Whsc1	0.189117	6.9831	4.90944	0.000183209	0.00289002	0.769055
Oosp1	0.649996	0.820314	4.90881	0.000183438	0.00289071	0.607908
LOC108352098	0.723565	3.02897	4.9227	0.000184136	0.0028988	0.959127
Tlr2	-0.650175	2.35788	-4.90374	0.000185268	0.0029137	0.875325
Slc7a14	0.475412	5.7949	5.00904	0.00018586	0.00292007	0.859162
Osbpl6	0.249454	7.03041	4.89901	0.000186996	0.00293497	0.7477
Neb	0.545683	3.45514	4.89746	0.000187567	0.002941	0.962682
Cers2	-0.283355	6.71192	-4.89678	0.000187819	0.002942	0.752837
Tubb4b	-0.252269	8.73841	-4.8937	0.000188955	0.00295684	0.726393
Olig1	-0.265819	7.38467	-4.88983	0.000190397	0.00297643	0.723269
Ints4	-0.261127	5.93912	-4.88917	0.000190643	0.00297661	0.781863
Luc7l2	0.207828	7.64735	4.88879	0.000190789	0.00297661	0.718126
Fam131b	0.462086	6.81042	5.02819	0.000191244	0.00297912	0.786795
Slc6a15	0.425332	5.91828	4.95314	0.00019133	0.00297912	0.805893
Mydgf	-0.266694	5.17648	-4.88623	0.000191749	0.00298268	0.840397
Lmtk2	0.203517	7.33363	4.8814	0.000193575	0.00300809	0.707471
Mrpl54	-0.323229	4.81128	-4.87724	0.000195165	0.0030298	0.857159
Prkacb	0.303608	8.93631	4.87593	0.000195667	0.00303458	0.692909
Clk4	0.358318	5.73746	4.87086	0.000197629	0.00305542	0.762478
Ppp3ca	0.270924	7.8745	4.87085	0.000197632	0.00305542	0.681314
Sv2b	0.663543	6.88031	5.21763	0.000197715	0.00305542	0.827666
Coa4	-0.367176	3.13022	-4.87044	0.000197791	0.00305542	0.900693
Sumf1	-0.333982	5.42609	-4.86823	0.000198653	0.00306449	0.783628
Mas1	-1.0395	1.65683	-4.91173	0.00019877	0.00306449	0.707102
Vwc2l	0.395927	4.89834	4.86604	0.000199511	0.00307289	0.828344
Lap3	-0.257817	6.76318	-4.86534	0.000199784	0.00307408	0.689513
Cystm1	-0.29562	5.49149	-4.86342	0.000200539	0.00308268	0.768431
Zfp157	0.264602	4.6423	4.86183	0.000201167	0.00308385	0.842868
Nrbp2	0.337461	8.62736	4.87963	0.000201206	0.00308385	0.670555
Tom1l1	-0.346098	4.55115	-4.86036	0.000201751	0.00308385	0.848479
Utrn	0.279668	7.67146	4.86034	0.000201757	0.00308385	0.662297
Pnn	0.259843	6.48603	4.86034	0.000201757	0.00308385	0.691504
Ctnnbl1	-0.224131	5.11563	-4.86024	0.000201797	0.00308385	0.795877
Cyfip2	0.270517	9.58809	4.85946	0.00020211	0.00308562	0.666731
Cirbp	0.36617	5.95406	4.86398	0.000204498	0.00311421	0.716104
LOC679894	0.316458	5.13837	4.85313	0.000204642	0.00311421	0.780628
Dkk3	-0.387338	7.01828	-4.91793	0.000204798	0.00311421	0.683821
Vegfa	0.393352	7.19322	4.926	0.000204972	0.00311421	0.682667
Gtpbp1	-0.206449	5.43935	-4.8523	0.000204976	0.00311421	0.751102
Flt3	0.411537	4.88241	4.85176	0.000205193	0.00311429	0.802642
Pla2g4b	0.490506	3.59036	4.8513	0.000205379	0.00311429	0.880852
LOC689574	-0.294317	4.73142	-4.8492	0.000206231	0.00311779	0.810812
Srpk2	0.226804	7.77571	4.8478	0.000206798	0.00311779	0.63679
Tyw1	-0.304858	4.06155	-4.84775	0.00020682	0.00311779	0.860304
Ebpl	-0.635882	3.28055	-4.84764	0.000206862	0.00311779	0.867497
Gli1	0.307163	4.24234	4.84751	0.000206917	0.00311779	0.848514
Wwp1	0.25451	6.28497	4.84738	0.000206968	0.00311779	0.677206
Shisa5	-0.334826	5.75888	-4.84676	0.000207222	0.00311779	0.713747
Scamp2	-0.321897	4.61889	-4.8466	0.000207288	0.00311779	0.816239
LOC691170	0.29644	4.55501	4.84632	0.000207401	0.00311779	0.82133
Las1l	0.267286	5.39877	4.84431	0.000208224	0.00312647	0.739591
Mesdc2	-0.203659	6.55546	-4.84393	0.000208378	0.00312647	0.655812
LOC100360380	0.253221	4.93783	4.84282	0.000208835	0.00313033	0.779247
Taf1d	0.460456	4.04067	4.84136	0.000209438	0.00313637	0.850144
Mecp2	0.19595	7.39528	4.84002	0.000209992	0.00314166	0.62552
Ttc39b	0.375795	5.29338	4.83943	0.000210234	0.00314227	0.740346
LOC108351545	0.535227	1.26476	4.83701	0.00021124	0.00315104	0.590247
LOC690414	-0.968928	0.64326	-4.83683	0.000211314	0.00315104	0.460574
Cacnb4	0.223532	7.17603	4.83583	0.000211732	0.00315104	0.620945
Mrpl27	-0.256676	4.99136	-4.83516	0.000212012	0.00315104	0.759438
Smim17	0.355253	6.17958	4.84504	0.000212227	0.00315104	0.66356
Copz2	-0.675251	2.38847	-4.83461	0.000212242	0.00315104	0.763636
Pbld1	0.754596	3.3457	4.90306	0.000212337	0.00315104	0.861589
Tmem63c	0.290718	5.9019	4.83405	0.000212476	0.00315104	0.677681
Thsd7a	0.282154	6.56408	4.83333	0.000212776	0.00315104	0.63503
Rfx4	-0.506069	5.42332	-4.94309	0.000212859	0.00315104	0.758034
Slc35d1	-0.569919	4.19171	-4.87734	0.000213124	0.00315104	0.839172
P2rx5	0.739499	2.41958	4.83224	0.000213234	0.00315104	0.763644
Fmo2	0.904727	1.69357	4.83156	0.000213518	0.00315226	0.654504
Zfp503	-0.374931	4.7912	-4.83097	0.000213766	0.00315295	0.770993
Nrg1	0.300072	6.25099	4.82959	0.00021435	0.00315859	0.644738
Elof1	-0.385047	4.73658	-4.82805	0.000215	0.0031612	0.770588
Hm13	-0.239752	6.64342	-4.82782	0.000215099	0.0031612	0.620558
Swi5	-0.163868	6.04416	-4.82764	0.000215175	0.0031612	0.654124
Fam117a	-0.525922	3.27225	-4.82726	0.000215335	0.0031612	0.830989
Kctd9	0.413404	5.69845	4.8681	0.000216158	0.00317031	0.694191
Aldh3b1	-0.648714	2.68917	-4.82261	0.000217319	0.00318436	0.778233
LOC103690089	0.211564	5.90626	4.8221	0.000217538	0.0031846	0.653698
Fgfr1	-0.162618	7.64016	-4.8211	0.000217968	0.00318467	0.585537
Nkd1	-0.40107	6.09993	-4.87249	0.000218192	0.00318467	0.657999
Ybx1	-0.25779	6.47627	-4.82028	0.000218321	0.00318467	0.6136
Boc	-0.508431	4.88421	-4.89044	0.000218356	0.00318467	0.767671
Wnt7a	-0.350665	4.95755	-4.81699	0.000219739	0.00320186	0.728307
Cldn10	-0.373523	4.83429	-4.81253	0.000221682	0.00322342	0.73161
Spag9	0.214982	9.26723	4.81246	0.000221713	0.00322342	0.571156
Zhx2	-0.248848	5.1535	-4.81218	0.000221837	0.00322342	0.699856
Gpatch4	1.47087	5.1838	5.40805	0.00022208	0.00322397	0.905178
Xylb	0.35069	4.21266	4.8094	0.000223054	0.00323395	0.779198
LOC108353018	-0.585293	3.70575	-4.81938	0.000223181	0.00323395	0.805678
Mxra8	-0.885329	4.76048	-5.14719	0.000224367	0.00324813	0.843585
Kmt2e	0.206407	7.24192	4.80487	0.000225056	0.00325141	0.558982
Nptx1	0.473914	6.55007	4.95288	0.000225143	0.00325141	0.639192
Hepacam	-0.258864	7.47076	-4.80451	0.000225216	0.00325141	0.554905
Tubb2b	-0.607003	7.10596	-5.10907	0.000225853	0.0032576	0.677165
Prdm15	0.301559	4.1459	4.80127	0.00022666	0.00326373	0.768311
Nap1l2	0.298085	6.76851	4.8012	0.000226694	0.00326373	0.563926
Lcat	-1.32622	5.63592	-5.38927	0.000227198	0.00326564	0.846615
Hectd2	0.363954	4.53447	4.7997	0.000227365	0.00326564	0.734944
Nde1	-0.500328	3.33433	-4.79951	0.000227452	0.00326564	0.783388
Sh3kbp1	-0.24465	5.89159	-4.79861	0.000227856	0.00326672	0.609114
Thrsp	-1.79601	4.24148	-5.37925	0.000228194	0.00326672	0.920337
Pnp	-0.382067	6.13639	-4.83365	0.000228273	0.00326672	0.60458
Mtif2	0.333587	4.44531	4.79734	0.000228426	0.00326672	0.738052
Ppp3r1	0.267848	8.20908	4.79702	0.00022857	0.00326672	0.535336
Brcc3	-0.229297	5.12215	-4.79571	0.000229165	0.00327224	0.670975
Npas3	-0.306389	4.53406	-4.79506	0.000229459	0.00327344	0.725742
LOC108348833	0.608803	2.04245	4.79333	0.000230243	0.00328107	0.647478
Mtap	0.292809	4.9029	4.79296	0.000230412	0.00328107	0.687049
Dhcr7	-0.457406	5.3325	-4.85684	0.000230788	0.00328343	0.670181
Eif4ebp2	-0.290279	5.36618	-4.79054	0.000231514	0.00329005	0.638506
Aldh1a2	-1.19025	6.4283	-5.37484	0.000231673	0.00329005	0.776766
Rps6ka5	0.300045	5.53989	4.78768	0.000232824	0.0033034	0.617456
Odc1	-0.21573	6.42501	-4.78546	0.000233851	0.00331497	0.547886
Ptgs1	-0.517385	2.86861	-4.78409	0.000234483	0.00332092	0.729147
Nvl	0.351537	3.72527	4.78166	0.000235614	0.00333126	0.751603
Hsdl2	-0.219025	6.45422	-4.7816	0.000235638	0.00333126	0.538797
Srsf11	0.250165	6.66808	4.78111	0.00023587	0.00333153	0.528041
Slc25a23	-0.214524	7.80626	-4.7781	0.000237274	0.00334834	0.499655
Slc25a39	-0.247535	5.97211	-4.77343	0.000239474	0.00337375	0.553815
Spcs1	-0.217666	5.92433	-4.77337	0.000239505	0.00337375	0.55721
Reln	-0.668037	8.41515	-5.13182	0.000239733	0.00337392	0.62747
Klhl25	-0.382806	3.75686	-4.76863	0.000241757	0.00339935	0.72676
Atp8a2	0.366745	8.14048	4.82276	0.000241974	0.00339936	0.501353
Prrx2	-1.11226	1.54658	-4.83919	0.000242707	0.0034066	0.528124
Ube2l6	-0.662782	2.4183	-4.76488	0.000243559	0.00341347	0.649562
LOC103694857	-1.53477	1.64508	-5.0087	0.00024382	0.00341347	0.542409
Atg13	0.226352	6.60646	4.76422	0.000243875	0.00341347	0.497449
Rbm5	0.246069	7.16162	4.76382	0.000244068	0.00341347	0.47987
Lcor_1	0.362717	3.92929	4.76079	0.000245537	0.00343094	0.705382
Ech1	-0.347725	6.5497	-4.77803	0.000247082	0.00344946	0.495958
Dmxl2	0.251772	8.07148	4.75656	0.000247602	0.00345364	0.455923
Rmnd1	0.299546	4.8706	4.75081	0.000250431	0.00348999	0.60921
Mapre1	-0.233817	6.17945	-4.74921	0.000251226	0.00349796	0.491736
Rilpl2	-0.360593	4.51268	-4.74839	0.000251637	0.00350057	0.639092
Ptpdc1	0.314069	5.7336	4.74766	0.000252001	0.00350252	0.522778
Arf6	-0.216043	5.45145	-4.74574	0.000252958	0.00351271	0.543341
Trove2	0.218918	5.27584	4.7446	0.000253528	0.00351516	0.55754
Qprt	-0.420509	2.7735	-4.74412	0.00025377	0.00351516	0.651378
Trmt13	0.437844	3.75479	4.74405	0.000253808	0.00351516	0.681522
Hdac10	0.40301	4.04869	4.7432	0.000254234	0.00351795	0.66602
Cthrc1	-0.756311	1.4752	-4.74227	0.000254703	0.00351888	0.477411
Pros1	-0.56846	4.40519	-4.81645	0.000255059	0.00351888	0.662598
Pet100	-0.274086	5.04598	-4.74151	0.000255085	0.00351888	0.573833
Rbbp6	0.217511	6.33856	4.74129	0.0002552	0.00351888	0.466196
Atp5g2	-0.205059	6.76171	-4.73926	0.000256225	0.00352902	0.442068
Gm2a	-0.252579	6.57775	-4.73894	0.000256386	0.00352902	0.4491
Nit2	-0.329363	5.19252	-4.73793	0.000256903	0.00353304	0.553018
Tmem87b	0.194662	6.15517	4.73538	0.000258202	0.00354779	0.466134
Pgm2l1	0.30807	7.72545	4.73232	0.000259775	0.00356627	0.410211
Cacna1e	0.29597	7.50012	4.73071	0.000260603	0.00357451	0.409365
LOC108351758	0.653947	1.23487	4.72778	0.00026212	0.00358972	0.41396
LOC100912293	0.603286	0.588607	4.72768	0.000262171	0.00358972	0.28964
RGD1561277	0.330053	4.43334	4.72459	0.000263783	0.00360864	0.600816
Irak3	-0.655609	4.01491	-4.81319	0.0002656	0.00363033	0.656457
Sec61a1	-0.287664	5.84351	-4.71761	0.000267459	0.00364093	0.454799
Zbtb25	0.234596	5.30474	4.71699	0.000267785	0.00364093	0.501226
Mctp1	0.719992	3.63887	4.8043	0.000267814	0.00364093	0.658885
Nt5dc3	0.280528	5.70076	4.71659	0.000268002	0.00364093	0.464681
Matk	0.292208	6.13795	4.71508	0.000268801	0.00364093	0.427849
LOC102547897	0.458483	2.87236	4.71499	0.000268853	0.00364093	0.608544
Akt3	0.271737	5.87525	4.71462	0.000269051	0.00364093	0.446401
LOC100912167	0.34883	5.28421	4.71426	0.000269239	0.00364093	0.498549
Plekhm3	0.277856	6.76588	4.71405	0.000269355	0.00364093	0.392611
Arhgap44	0.246723	7.85763	4.71378	0.0002695	0.00364093	0.37258
Amer1	0.478398	3.22205	4.71362	0.000269584	0.00364093	0.625445
Ilk	-0.179801	6.65752	-4.71349	0.000269652	0.00364093	0.395287
Serac1	0.243685	5.07567	4.71315	0.000269837	0.00364093	0.51599
LOC102549402	0.630187	1.2701	4.71261	0.000270124	0.00364093	0.396499
Hexa	-0.465325	5.92538	-4.82268	0.000270278	0.00364093	0.483203
Anapc13	-0.385244	3.97847	-4.71208	0.000270405	0.00364093	0.611787
Myom3	0.83253	2.98053	4.78615	0.000270628	0.00364093	0.624397
Gstt1	-0.676561	1.97938	-4.71153	0.000270701	0.00364093	0.503593
Snx18	-0.328814	5.50159	-4.71136	0.000270792	0.00364093	0.47238
mt-Rnr2	0.663617	11.1232	5.0342	0.000272404	0.00365367	0.520476
Smim5	-0.526141	2.40518	-4.70835	0.000272414	0.00365367	0.551894
Lat2	-0.419846	2.38232	-4.70831	0.000272439	0.00365367	0.549043
Ndst4	0.865208	3.58427	4.87691	0.000273401	0.00366344	0.661211
Opa1	0.17858	7.85509	4.70548	0.00027397	0.00366792	0.35616
RGD1310081	0.257674	5.5493	4.70453	0.000274487	0.00366921	0.454429
Stx1b	0.275431	9.52746	4.70419	0.000274675	0.00366921	0.360803
Pak1	0.322165	8.06995	4.71729	0.000274769	0.00366921	0.358035
Asgr1	-0.88336	1.35575	-4.70198	0.000275881	0.00368092	0.392661
Fbxo38	0.178995	5.96196	4.69957	0.000277202	0.0036954	0.40976
Ftx	0.519088	3.38677	4.6978	0.000278178	0.00370412	0.60051
Mir770	0.693851	5.19612	4.95786	0.000278329	0.00370412	0.573492
Pla2g4e	0.294599	4.27958	4.69642	0.000278945	0.00370524	0.560383
Hsp90ab1	-0.197355	10.6218	-4.69615	0.000279093	0.00370524	0.360601
Tmem132a	-0.294995	7.07148	-4.69609	0.000279123	0.00370524	0.348369
RGD1305350	-0.218904	4.96275	-4.69552	0.000279442	0.00370634	0.492892
Dnajc5	0.190301	8.53833	4.6907	0.00028213	0.00373666	0.326288
Gas1	-0.47896	4.60988	-4.72407	0.000282206	0.00373666	0.532458
Abhd17c	-0.363782	3.89472	-4.69014	0.000282445	0.00373667	0.57526
Lrrc7	0.399686	3.63593	4.68936	0.000282878	0.00373925	0.583625
Plcb3	-0.330872	4.60954	-4.68858	0.000283317	0.00374188	0.515379
Zbtb40	0.370211	5.29861	4.6876	0.000283872	0.00374563	0.445462
Zfyve27	0.277694	6.42739	4.68723	0.000284079	0.00374563	0.355063
Sqrdl	-0.472777	3.16048	-4.6864	0.000284546	0.00374863	0.574383
Tvp23a	0.377831	4.77645	4.68319	0.000286368	0.00376947	0.48891
Rgs17	0.319381	6.29501	4.68236	0.000286839	0.00376995	0.353441
Cacna1b	0.282404	6.93739	4.68228	0.000286886	0.00376995	0.324506
Ganc	0.274968	5.09201	4.67949	0.00028848	0.00378772	0.449318
Ercc6	0.303265	5.20014	4.67826	0.000289186	0.0037938	0.436388
Mppe1	0.405979	4.54856	4.67703	0.000289892	0.00379989	0.499776
Acadm	-0.229277	5.80278	-4.67645	0.000290227	0.00380109	0.377284
Uhrf1bp1l	0.209197	6.07906	4.67558	0.000290729	0.00380449	0.354067
Timm9	0.29118	4.4193	4.67474	0.000291217	0.0038077	0.506846
Cntn1	-0.238068	10.0431	-4.6742	0.000291527	0.00380858	0.308389
Ggcx	-0.535886	4.82265	-4.76381	0.000294083	0.0038373	0.494646
Rbm25l1	0.317655	4.38058	4.66959	0.000294216	0.0038373	0.500665
Begain	0.312708	6.4752	4.66881	0.000294671	0.00384004	0.316414
Hook1	0.28306	5.40825	4.66835	0.000294939	0.00384033	0.396908
Mthfs	-0.371389	3.68997	-4.66738	0.000295507	0.00384329	0.541494
LOC103693092	0.683325	3.13155	4.68779	0.000295656	0.00384329	0.54313
Snrnp70	0.366573	8.05666	4.72689	0.000296207	0.00384726	0.303587
Gls	0.389632	8.29977	4.7503	0.000296772	0.00384838	0.311616
Tmem158	-0.785994	3.68469	-4.79915	0.000296785	0.00384838	0.576409
LOC102553298	-0.292302	4.77991	-4.66429	0.000297328	0.00385155	0.451383
B3gnt8	-0.618133	0.954878	-4.66397	0.000297521	0.00385155	0.264609
Mfsd12	0.220694	6.4215	4.66279	0.000298221	0.00385741	0.30696
LOC684327	-0.381349	5.65929	-4.68696	0.000298528	0.0038582	0.372633
Rgs7bp	0.289541	7.67386	4.66106	0.000299245	0.00386428	0.269921
Camk2b	0.2241	8.62589	4.6597	0.000300058	0.00387159	0.265385
LOC102548287	-0.685629	0.642891	-4.65581	0.00030239	0.00389847	0.192613
Mroh5	0.912804	2.22903	4.70368	0.00030295	0.0039013	0.447816
Plekha6	0.214628	7.8348	4.65443	0.00030322	0.0039013	0.255403
Gpr22	0.340363	4.72185	4.6542	0.000303357	0.0039013	0.438236
Pafah1b1	0.231476	9.82379	4.65205	0.000304657	0.00391481	0.261536
Ier5	-0.458681	4.17608	-4.65122	0.000305164	0.00391811	0.483911
Lmln	0.250686	4.83935	4.65015	0.000305814	0.00392323	0.417896
Eea1	0.226924	5.97777	4.64874	0.000306673	0.00393104	0.308867
S100a1	-0.408408	5.02169	-4.65867	0.000307298	0.00393582	0.399876
Pde7a	0.354032	3.97352	4.64662	0.000307967	0.00393992	0.489191
Agbl3	0.419842	4.51304	4.64637	0.000308121	0.00393992	0.444603
Dock2	-0.440155	3.33654	-4.64571	0.000308526	0.00394189	0.505307
Paqr4	-0.373169	6.27852	-4.68473	0.000309442	0.00395037	0.296643
Cecr5	-0.402467	3.94239	-4.64075	0.000311592	0.00396856	0.480222
Herc3	0.222566	7.48027	4.6404	0.000311804	0.00396856	0.231095
Srrm1	0.261675	7.32146	4.64015	0.000311962	0.00396856	0.232943
Ptch1	0.266052	6.89501	4.63989	0.000312125	0.00396856	0.241955
Ints6l	0.35577	4.63364	4.63984	0.000312156	0.00396856	0.419622
Ndufa10l1	-1.31736	3.7815	-5.03744	0.000312387	0.00396856	0.59497
Psap	-0.22115	11.2243	-4.63824	0.000313152	0.00397308	0.256584
Mtus2	0.405162	5.14012	4.6544	0.00031325	0.00397308	0.371406
P4hb	-0.21177	7.51358	-4.63721	0.000313796	0.00397678	0.22433
Pgls	-0.377543	3.89616	-4.63475	0.000315337	0.00399118	0.471558
Adamts2	0.398086	5.27735	4.65442	0.000315442	0.00399118	0.352357
RGD1566401	0.625534	9.59655	4.94389	0.000316706	0.00400394	0.346739
Eif5a2	0.343539	7.65739	4.66575	0.000318413	0.00402122	0.223901
Dstn	-0.319407	6.66669	-4.6296	0.000318586	0.00402122	0.229881
Nktr	0.301515	7.01403	4.62787	0.000319684	0.00402883	0.215002
Srebf2	-0.184001	7.76814	-4.62784	0.000319703	0.00402883	0.203222
Rasgrf1	0.276235	9.31454	4.62582	0.000320997	0.00404188	0.203536
Gadd45gip1	-0.229291	5.03277	-4.62485	0.000321618	0.00404644	0.348793
Cygb	0.223347	6.95016	4.62374	0.000322328	0.00405212	0.208261
LOC361985	-0.202023	5.9448	-4.62313	0.000322717	0.00405375	0.260901
Tmem50a	-0.228165	6.30344	-4.62245	0.000323155	0.00405601	0.234335
Gfra4	0.65714	2.62845	4.62198	0.000323463	0.00405663	0.425444
RGD1564053	0.396929	4.96176	4.62017	0.000324628	0.00406798	0.348218
Chchd3	-0.166209	6.0809	-4.61872	0.000325571	0.00407653	0.241782
Srsf2	0.229743	7.4101	4.61699	0.000326693	0.00408732	0.185682
Nrip3	0.313919	7.18275	4.62047	0.000327053	0.00408856	0.190336
Mllt10	0.284284	5.42852	4.61442	0.000328372	0.00410177	0.289533
LOC108352166	0.633362	0.481154	4.61133	0.0003304	0.00412381	0.0944517
Dock7	-0.191412	6.58028	-4.6109	0.000330687	0.00412411	0.196191
Scai	0.352941	5.08031	4.60954	0.000331586	0.00412792	0.315014
Cd82	-0.237065	6.2767	-4.60894	0.000331979	0.00412792	0.209354
Tspan11	-0.513265	2.96993	-4.60887	0.000332026	0.00412792	0.427005
Arhgef9	0.219089	7.28098	4.60884	0.000332047	0.00412792	0.171536
Agtpbp1	0.274193	7.87918	4.60759	0.000332873	0.00413492	0.162353
Sharpin	-0.189247	5.43172	-4.60716	0.000333161	0.00413521	0.274591
Sytl5	0.562707	3.12079	4.60617	0.00033382	0.00414011	0.428647
Ptchd4	0.398952	2.49914	4.60544	0.000334307	0.00414287	0.385109
Pla2g15	-0.246856	4.03601	-4.60475	0.000334765	0.00414526	0.405612
Yif1a	-0.319364	4.04099	-4.60325	0.000335772	0.00415445	0.402652
Rbm3	1.22226	5.78607	5.13073	0.000336516	0.00416037	0.441712
Smim15	-0.25055	4.88492	-4.60149	0.00033695	0.00416245	0.318812
Rnmt	0.25126	6.20863	4.59996	0.000337978	0.00417185	0.196243
Peli3	0.304187	5.67203	4.59806	0.000339263	0.00418417	0.235076
Flnc	-0.48584	6.28201	-4.75875	0.00033951	0.00418417	0.255293
Atp5i	-0.270544	6.40425	-4.59628	0.00034047	0.00419271	0.176729
Hdac9	-0.31638	4.73996	-4.59423	0.000341864	0.00420657	0.320315
Prdm10	0.282773	3.98566	4.59218	0.00034327	0.00422055	0.385598
Lrrc45	0.271689	5.172	4.59143	0.000343783	0.00422242	0.269807
Lrrc8c	-0.238941	5.0843	-4.59096	0.000344105	0.00422242	0.277643
Tfrc	0.313676	7.04429	4.59492	0.000344231	0.00422242	0.142599
Ero1a	0.262303	6.38494	4.59017	0.000344646	0.00422421	0.165793
C3	-1.33504	5.53956	-5.12173	0.000346487	0.00424345	0.436708
Snapc4	0.322944	4.28004	4.58692	0.000346895	0.00424513	0.352081
Mgat5b	-0.273637	6.02503	-4.58563	0.000347787	0.00425272	0.181095
Hmbox1	0.228597	7.93756	4.58456	0.00034853	0.00425849	0.116262
Plpp4	-0.400606	4.73646	-4.58263	0.000349879	0.00427163	0.298897
Ptpro	-0.495807	5.1331	-4.6738	0.000350384	0.00427447	0.293309
Hspb6	-0.26712	5.29337	-4.57998	0.000351732	0.00428416	0.235171
Ptpn6	-0.469932	3.31341	-4.57952	0.000352059	0.00428416	0.384535
Mcee	-0.26872	4.27044	-4.57917	0.000352302	0.00428416	0.337839
Slc3a2	-0.349554	7.91803	-4.62486	0.000352322	0.00428416	0.125811
Hist1h1c	-0.806893	6.53882	-4.98959	0.000352546	0.00428416	0.303604
Cldn5	0.470823	5.65729	4.68331	0.000353086	0.0042874	0.241613
Samd5	-0.342439	3.25509	-4.57749	0.00035349	0.00428897	0.38027
LOC100910676	0.757306	3.10389	4.63502	0.000353775	0.00428911	0.389481
Cdk14	0.312034	7.34693	4.58332	0.000354255	0.00428994	0.109302
Tspan3	-0.1538	8.69437	-4.57621	0.000354391	0.00428994	0.100184
Slc46a1	-0.30877	3.40554	-4.57339	0.000356393	0.00431084	0.373413
Ak4	-0.254313	6.15513	-4.57232	0.000357154	0.00431672	0.14522
Grik2	0.279465	5.00588	4.57018	0.000358687	0.0043319	0.245566
LOC108348051	-0.289748	6.72429	-4.56839	0.000359977	0.00434087	0.106235
LOC100912823	0.421701	2.78965	4.56837	0.000359984	0.00434087	0.344515
Enpp3	-0.989558	1.59597	-4.60703	0.000360292	0.00434124	0.217042
Zmat3	0.229084	7.16184	4.56565	0.000361954	0.00435791	0.0881028
Pcdhgb4	-0.552908	2.09518	-4.56389	0.000363227	0.00436988	0.271988
Pik3ap1	-0.749143	3.36742	-4.64273	0.000364503	0.00438186	0.374868
Fam13b	0.19972	7.57543	4.56168	0.000364833	0.00438248	0.0737933
Ccdc88a	0.190028	7.48545	4.56105	0.000365292	0.00438462	0.0736146
Tmed1	-0.382605	3.66559	-4.55777	0.000367699	0.00441014	0.338775
Zfp445	0.199034	6.21494	4.55697	0.00036829	0.00441135	0.110589
Itpripl2	-0.503201	1.50575	-4.55646	0.000368662	0.00441135	0.185186
Ogfod1	0.2906	5.38932	4.55611	0.000368916	0.00441135	0.179164
Eaf1	0.270123	5.08762	4.55587	0.000369095	0.00441135	0.209112
P2ry4	0.641585	3.59002	4.60087	0.000369208	0.00441135	0.351653
Snf8	-0.168442	5.62707	-4.55401	0.000370474	0.0044231	0.151842
Ptpra	-0.164654	7.61911	-4.55235	0.000371707	0.00442892	0.054747
Pofut2	-0.192516	5.49535	-4.55226	0.000371768	0.00442892	0.160811
Ak2	-0.357319	4.14923	-4.55221	0.00037181	0.00442892	0.297501
Emid1	-0.460684	4.50398	-4.57104	0.000372274	0.00443107	0.27098
Ccdc3	-1.00811	4.09934	-4.85733	0.000372589	0.00443146	0.402261
Pip5kl1	0.587079	4.39686	4.64422	0.000373263	0.00443611	0.307218
Tbrg4	0.279789	4.98694	4.54835	0.000374688	0.00444966	0.205061
Zfp710	-0.252957	4.72825	-4.54457	0.000377535	0.00447837	0.225004
Ifi47	-0.845329	2.0841	-4.56503	0.000377677	0.00447837	0.240683
Chd1l	0.586291	3.07005	4.54383	0.000378097	0.00447909	0.314699
Tspan31	-0.286655	5.33299	-4.54355	0.000378309	0.00447909	0.159961
Susd5	-0.466472	3.3072	-4.54196	0.000379508	0.00448989	0.315953
Rpe	-0.315177	5.04277	-4.54064	0.000380518	0.00449245	0.184211
Cyba	-0.593527	2.91907	-4.54061	0.000380542	0.00449245	0.302562
Heatr3	0.32696	4.27816	4.54055	0.000380585	0.00449245	0.26366
Cep295	0.36429	3.63816	4.5365	0.000383681	0.00452558	0.300214
Serinc2	0.650973	0.782767	4.53607	0.000384016	0.00452613	0.0363416
Eml1	-0.427289	6.8862	-4.6535	0.000384698	0.00453076	0.0866457
Dph3	-0.216517	5.09082	-4.53433	0.000385356	0.0045351	0.166311
Zbtb7c	-0.430213	3.63588	-4.53222	0.000386985	0.00455086	0.292437
LOC108349760	-0.884571	1.21165	-4.52749	0.000390664	0.00459067	0.0926923
Scamp4	-0.277348	4.68455	-4.52695	0.000391089	0.00459221	0.195704
Osbpl8	0.261479	5.69833	4.52653	0.000391416	0.00459262	0.0916162
Kcna1	0.578962	6.84107	4.7928	0.000392357	0.00460021	0.131006
Slc41a1	-0.289798	6.93483	-4.52435	0.000393133	0.00460587	0.0116583
Caskin2	-0.313034	5.84136	-4.52365	0.000393684	0.00460887	0.0736727
mt-Rnr1	0.460934	10.6951	4.67518	0.000394817	0.0046176	0.0836783
Arfgap2	0.181801	6.14298	4.52196	0.000395019	0.0046176	0.0462309
En2	-0.847953	0.981948	-4.52146	0.00039541	0.00461872	0.0466083
Slc24a2	0.531248	9.16072	4.75475	0.000396596	0.00462912	0.0925875
Stxbp1	0.245441	10.0407	4.5163	0.000399518	0.00465853	-0.00458801
Erc2	0.397529	4.60146	4.51606	0.000399711	0.00465853	0.184486
Aass	-0.695977	3.27432	-4.56046	0.000401745	0.00467876	0.276652
Cmc2	-0.345758	3.69773	-4.51299	0.000402183	0.00467926	0.253757
H2afv	-0.289566	4.38434	-4.51242	0.000402638	0.00467926	0.199105
Letm2	0.313083	4.99506	4.51237	0.000402684	0.00467926	0.134201
Nfam1	-0.466501	3.35425	-4.51121	0.000403617	0.00468548	0.259606
Map3k5	-0.312003	3.55094	-4.51096	0.000403817	0.00468548	0.25558
Dcaf17	0.266748	4.76316	4.50983	0.000404738	0.00469269	0.153937
Rbfox3	0.306687	6.07891	4.50933	0.000405142	0.00469389	0.0264415
Dnmbp	-0.392586	3.92792	-4.50713	0.000406929	0.00471112	0.229374
Efnb1	-0.732403	3.83141	-4.63312	0.000407645	0.00471591	0.276575
Chrna4	0.3394	5.47191	4.50544	0.000408313	0.00472016	0.0717953
Scn4b	0.474178	8.48498	4.68762	0.000412076	0.00476015	0.0310771
Morc3	0.202998	5.25433	4.49951	0.0004132	0.00476961	0.0811759
Puf60	-0.162639	7.18387	-4.49767	0.000414725	0.0047818	-0.0476294
L1cam	0.263081	8.18335	4.4975	0.000414866	0.0047818	-0.0576871
Clca1	-1.278	1.50757	-4.63996	0.000415299	0.00478327	0.0946144
Llgl1	-0.257562	7.07051	-4.49615	0.000415992	0.00478539	-0.0480758
Cap1	-0.149089	7.71943	-4.49603	0.000416094	0.00478539	-0.0583353
LOC102547903	0.304191	4.37097	4.4951	0.000416871	0.0047886	0.167286
Atxn7	0.269333	4.67503	4.49496	0.000416985	0.0047886	0.134727
Sv2c	0.403102	8.58911	4.59858	0.000417599	0.00479214	-0.0168599
Rapgef4	0.340692	6.86253	4.526	0.000419181	0.00480486	-0.0344093
Fam184b	-0.57454	3.60037	-4.50729	0.000419321	0.00480486	0.224301
Nxn	-0.644171	5.18279	-4.71064	0.000420502	0.00481487	0.162718
Rbm41	0.444263	2.63578	4.48986	0.000421275	0.0048202	0.195392
Mir1249	0.690657	0.958844	4.48927	0.000421775	0.0048224	-0.00674703
Rbck1	-0.274776	5.7131	-4.48775	0.000423059	0.00483355	0.0137198
Crebzf	0.244181	6.22966	4.48677	0.00042389	0.00483951	-0.029327
Ppp1r9a	0.180965	7.67131	4.48491	0.000425479	0.00485063	-0.0800118
Ppargc1b	0.359137	3.39431	4.48453	0.000425806	0.00485063	0.21012
Upf1	-0.164483	6.5036	-4.48389	0.000426345	0.00485063	-0.0519558
Map3k15	0.665129	0.434369	4.48383	0.000426397	0.00485063	-0.105862
Wdr54	0.539984	2.15586	4.48382	0.000426412	0.00485063	0.142882
Vcam1	-0.308281	5.0815	-4.48266	0.000427399	0.00485712	0.0667569
Ybey	-0.416322	1.97	-4.48243	0.000427603	0.00485712	0.12111
Uqcr10	-0.235922	6.09657	-4.48054	0.000429223	0.004872	-0.0323498
LOC102547667	0.458603	3.87997	4.47914	0.000430437	0.00488224	0.18014
LOC108349039	0.808575	0.783886	4.47682	0.000432445	0.00489098	-0.0558581
Impact	0.320054	8.99418	4.50069	0.000432501	0.00489098	-0.0847462
Crat	-0.216811	7.08844	-4.4766	0.000432636	0.00489098	-0.0874901
Arid3a	0.293391	3.50998	4.47584	0.00043329	0.00489098	0.191589
Fam196b	0.346048	4.55108	4.47584	0.000433298	0.00489098	0.111603
Mon2	0.195827	6.79415	4.47575	0.000433374	0.00489098	-0.0807707
Gramd1a	0.193455	6.24762	4.47573	0.000433394	0.00489098	-0.0526641
Vps50	0.248499	5.17983	4.47484	0.000434161	0.00489612	0.0406802
Nme2	-0.184215	6.83508	-4.47298	0.000435787	0.00490753	-0.0877352
Eps8	-0.197743	5.9422	-4.47297	0.0004358	0.00490753	-0.0355026
Skap2	-0.260348	5.55589	-4.47161	0.000436993	0.00491511	-0.00349885
LOC684327_1	-0.443983	3.37294	-4.47148	0.000437101	0.00491511	0.186394
Mapkapk3	-0.279745	4.41332	-4.47048	0.000437979	0.00492145	0.115353
Ctc1	-0.266527	5.79251	-4.46784	0.000440315	0.00494415	-0.0326616
Slc9a5	0.341342	5.0573	4.46746	0.000440651	0.00494438	0.0398828
Clu	-0.441531	10.0271	-4.60306	0.000444859	0.00498802	-0.0492172
RGD1562310	0.255214	4.6862	4.46219	0.000445336	0.0049898	0.0697828
Acer2	1.56684	4.20129	4.93228	0.000445989	0.0049906	0.28346
LOC108351541	0.626938	2.197	4.4614	0.000446044	0.0049906	0.108855
Tsen15	-0.28033	4.10563	-4.45972	0.000447553	0.00500391	0.124599
Pcdhgb5	-0.386595	3.07514	-4.45747	0.000449576	0.00502293	0.159148
Nid1	-0.840228	6.3605	-4.85771	0.000451801	0.00504168	0.0709632
Ago4	0.392918	3.50822	4.45491	0.000451897	0.00504168	0.152902
Gfap	-0.376251	10.7018	-4.52018	0.000452464	0.00504412	-0.0877132
Htra3	-0.61388	3.44133	-4.48049	0.00045276	0.00504412	0.161194
LOC108351885	0.377584	4.84492	4.45296	0.000453675	0.00505072	0.0350781
Itm2b	-0.221845	9.49032	-4.45166	0.000454857	0.00506028	-0.140821
Decr1	-0.416584	4.88476	-4.47129	0.000456174	0.00506867	0.0343299
Cntfr	-0.259708	6.33589	-4.45013	0.000456258	0.00506867	-0.109015
Rmi1	0.256973	5.28807	4.44943	0.000456903	0.00507224	-0.0204683
Dnajb12	-0.174532	5.78781	-4.44754	0.000458645	0.00508798	-0.0728515
Mpzl1	-0.313048	5.40135	-4.44428	0.00046166	0.0051178	-0.0419481
LOC100911177	0.398735	4.75044	4.44279	0.000463044	0.00512951	0.0260096
Adcy1	0.353421	8.22777	4.49592	0.000467892	0.00517955	-0.150394
Rc3h1	0.210792	6.57227	4.43625	0.000469171	0.00518684	-0.150064
Cryl1	-0.397714	3.47202	-4.43621	0.000469213	0.00518684	0.119196
Sall2	-0.17786	6.68315	-4.4356	0.000469788	0.00518954	-0.156526
Ccni	-0.219741	7.658	-4.43297	0.000472282	0.00521341	-0.183498
Zc3h12c	0.230642	4.5316	4.43124	0.000473925	0.00522786	0.0265983
Rcan2	0.266229	8.46915	4.43055	0.000474584	0.00523145	-0.190931
U2af2	-0.178349	6.9754	-4.42816	0.000476872	0.00524884	-0.181311
LOC310926	0.664065	0.370401	4.42806	0.000476969	0.00524884	-0.201471
Cisd2	-0.158171	6.68682	-4.42785	0.00047717	0.00524884	-0.17218
Cyb5r2	-0.493072	3.7498	-4.4275	0.000477503	0.00524884	0.091108
Fyco1	-0.318614	5.19912	-4.42715	0.000477838	0.00524884	-0.0546777
Paqr9	0.316875	4.26949	4.42609	0.000478862	0.00525641	0.0448748
Vamp3	-0.19862	5.86318	-4.42544	0.000479488	0.00525892	-0.123081
Stat1	-0.346643	6.32534	-4.45598	0.000479762	0.00525892	-0.143628
Mbd6	0.311501	5.9347	4.42433	0.000480559	0.00526397	-0.130664
Fam193b	0.287796	5.46326	4.42264	0.000482196	0.00527821	-0.0909403
Fam210b	-0.21423	5.45316	-4.42138	0.000483423	0.00528795	-0.0928318
Plcxd2	0.303477	7.13843	4.4273	0.000484476	0.0052948	-0.197448
Sppl2a	-0.270668	4.70573	-4.41974	0.000485025	0.0052948	-0.015006
Adgrf5	0.372213	5.96294	4.46116	0.000485064	0.0052948	-0.12324
Gnl3	0.327479	4.87505	4.41764	0.000487078	0.00531308	-0.0376766
Draxin	-0.752041	3.34864	-4.50225	0.00048836	0.00532336	0.110499
Hsph1	-0.351297	8.09114	-4.47334	0.000488813	0.00532459	-0.193833
Penk	0.470329	8.23276	4.5986	0.000489619	0.00532967	-0.139684
Rufy3	0.195011	8.50568	4.41366	0.000490996	0.00533759	-0.224605
Wdpcp	-0.41656	3.02956	-4.41363	0.000491028	0.00533759	0.0786682
Tcf7l1	-0.390366	3.58893	-4.41298	0.000491665	0.0053408	0.0717712
Pgm3	-0.282743	4.81951	-4.41175	0.000492885	0.00535034	-0.0433281
Limk1	0.242408	7.76302	4.41134	0.000493297	0.00535111	-0.227668
Brca2	0.450636	3.18794	4.4096	0.000495026	0.00536615	0.0734862
Cyp51	-0.502017	8.45453	-4.61857	0.000495689	0.00536962	-0.140322
Gpld1	0.222315	6.84352	4.40795	0.00049667	0.00537653	-0.217553
Tmem245	0.223459	7.49289	4.40575	0.00049888	0.00539672	-0.235979
Atl1	0.285296	7.00294	4.40322	0.000501426	0.00542052	-0.23155
Cdc37l1	0.221852	6.84521	4.40252	0.000502133	0.00542442	-0.228452
Slc37a2	-0.647438	2.50378	-4.40102	0.000503653	0.00543422	0.0301272
LOC103693323	-0.561782	1.13152	-4.40094	0.000503734	0.00543422	-0.119402
RGD1307752	-0.251384	5.24534	-4.39847	0.000506251	0.00545762	-0.116413
Gabrb2	0.387995	6.75507	4.47945	0.000507999	0.0054727	-0.19819
Mrpl38	-0.269435	5.22348	-4.3949	0.000509905	0.00548946	-0.121029
Igfbp7	-0.611998	6.31447	-4.65987	0.000511479	0.00549912	-0.102383
Phka1	-0.205396	6.0517	-4.39273	0.000512136	0.00549912	-0.203464
Cntnap1	0.222032	8.42186	4.39263	0.000512241	0.00549912	-0.266909
Ptms	-0.245546	8.52591	-4.3926	0.000512271	0.00549912	-0.266612
Ywhae	-0.167814	9.78719	-4.39232	0.000512559	0.00549912	-0.255474
Cetn2	-0.278941	5.75621	-4.39192	0.000512979	0.00549987	-0.179836
Trpc5	0.275012	5.54988	4.39149	0.000513419	0.00550039	-0.161096
Rac2	-0.628543	2.61481	-4.39119	0.00051373	0.00550039	0.0200676
Mettl16	-0.263341	5.57383	-4.39067	0.000514266	0.00550237	-0.165213
Hs3st5	0.349492	4.17613	4.39018	0.000514779	0.0055041	-0.0146847
Thbs4	-1.28746	2.41181	-4.61456	0.000515449	0.0055075	0.0436676
Hsp90b1	-0.291374	8.93712	-4.38903	0.000515972	0.00550933	-0.271297
Fbln1	-1.08498	5.89671	-4.84416	0.000517805	0.00552513	-0.00493886
Pou6f1	0.237608	6.28053	4.38612	0.000519011	0.00553423	-0.232992
Epn2	-0.199145	7.05922	-4.38486	0.000520322	0.00554444	-0.269913
Rhbdf1	-0.533087	3.99992	-4.41526	0.000521415	0.00555231	0.00204572
Manbal	-0.257259	5.45741	-4.38287	0.000522415	0.00555512	-0.169189
Akap8	0.38041	6.26024	4.44536	0.000522438	0.00555512	-0.208794
Asxl1	0.214301	5.7453	4.38256	0.000522743	0.00555512	-0.197652
Scp2	-0.207707	7.74466	-4.38134	0.000524037	0.00556494	-0.287539
Plcd1	-0.321055	4.45412	-4.38101	0.000524377	0.00556494	-0.0617836
Tyrobp	-0.463333	3.30573	-4.37986	0.000525598	0.00557411	0.0183593
Thbs2	-1.04118	4.44458	-4.73021	0.000526463	0.00557951	0.0721196
Snrpn	0.49566	1.16943	4.37721	0.000528414	0.00559309	-0.151862
Igsf10	-0.613447	3.91424	-4.44838	0.000528458	0.00559309	0.01074
RGD1565685	0.218071	4.47449	4.37652	0.000529147	0.0055966	-0.0732811
RGD1565002	-0.221804	5.19787	-4.37473	0.00053107	0.00561315	-0.15831
Slc35f3	0.457181	3.99269	4.37397	0.000531875	0.00561487	-0.0281525
Atp6v1a	0.214522	9.10276	4.37347	0.000532416	0.00561487	-0.301081
Col17a1	1.08581	1.21336	4.43544	0.000532423	0.00561487	-0.150151
Uhmk1	0.321486	7.17402	4.4015	0.000532696	0.00561487	-0.282271
Bcan	-0.240739	8.34661	-4.3729	0.000533025	0.00561487	-0.306537
Vgll4	-0.222584	4.8159	-4.37243	0.000533538	0.00561649	-0.120198
Sh3glb2	0.251071	7.41552	4.37175	0.000534269	0.00562041	-0.302851
Srprb	-0.216559	5.30414	-4.37099	0.000535087	0.00562524	-0.177008
Tmsb10	-0.29839	7.43294	-4.37546	0.000538288	0.00565159	-0.306976
Kif3a	0.214344	7.79301	4.36793	0.000538399	0.00565159	-0.314766
Slc19a3	1.48575	2.38739	4.64857	0.000538676	0.00565159	0.0116587
Rnf123	0.196764	7.16256	4.36591	0.000540598	0.00566795	-0.310126
Chst3	-0.353903	4.03233	-4.36488	0.000541721	0.00567593	-0.0496936
Sfmbt1	0.271861	5.51904	4.36387	0.000542824	0.00568368	-0.212724
Tmem176a	-0.464076	4.94092	-4.42542	0.000543408	0.005686	-0.123977
Tmem147	-0.246795	5.18865	-4.36092	0.000546073	0.00570337	-0.184427
LOC108348366	0.624919	1.41333	4.3609	0.000546095	0.00570337	-0.146413
Ebf4	0.341254	3.77764	4.3608	0.0005462	0.00570337	-0.0371079
Mdfi	-0.739061	1.65362	-4.36051	0.000546524	0.00570337	-0.118861
Entpd2	-0.343052	4.87536	-4.36012	0.000546947	0.00570398	-0.150298
Uri1	0.194346	5.17188	4.35943	0.000547717	0.00570821	-0.185711
Gal3st4	-0.49071	3.24298	-4.35883	0.000548379	0.00571131	-0.0197206
Pdpk1	0.159385	7.30711	4.35759	0.000549748	0.00572176	-0.32959
Arfgef1	0.163854	7.19464	4.35709	0.000550305	0.00572376	-0.328476
Mpzl2	-1.16018	4.05584	-4.70563	0.000551115	0.00572837	0.0576668
Ttc7b	0.165197	6.9843	4.35563	0.000551934	0.00573309	-0.326492
LOC108352127	0.246016	4.65395	4.35419	0.00055354	0.00574595	-0.137006
Ap4e1	0.265443	4.27365	4.35352	0.000554287	0.0057499	-0.0956494
Dync1i2	0.169806	7.62392	4.35128	0.000556803	0.00577218	-0.346554
LOC108348988	0.6401	0.599293	4.35042	0.000557769	0.00577654	-0.281065
Kifc1	-0.656046	0.861494	-4.35025	0.000557961	0.00577654	-0.240311
Cilp	-0.806805	1.14882	-4.34898	0.000559389	0.00578543	-0.201514
Shd	0.28978	5.76861	4.34883	0.000559559	0.00578543	-0.266359
Atp6v1e1	0.206074	8.15112	4.34828	0.000560178	0.00578713	-0.355879
Map7d2	0.23494	7.1676	4.34791	0.000560599	0.00578713	-0.346179
Ngb	-0.47397	4.45991	-4.38107	0.000560831	0.00578713	-0.112187
Abcc2	0.542667	2.04764	4.34631	0.000562419	0.00579969	-0.102134
Trim2	0.244612	8.23454	4.34376	0.00056532	0.00582577	-0.364966
LOC108353136	0.760315	0.860692	4.34193	0.000567416	0.0058412	-0.254121
Mcm2	-0.327557	3.47057	-4.3418	0.000567563	0.0058412	-0.056498
Bri3bp	-0.416609	2.79363	-4.34078	0.000568733	0.0058476	-0.0601046
Apod	-0.50812	8.77233	-4.55421	0.000568932	0.0058476	-0.271945
Tsc22d2	0.238337	5.76834	4.34006	0.000569566	0.00585028	-0.284037
Tnfrsf1a	-0.342266	4.50312	-4.33736	0.000572678	0.0058784	-0.151883
Cst3	-0.299294	10.9774	-4.33431	0.00057621	0.00590983	-0.351893
Pepd	-0.209983	5.68278	-4.33407	0.000576496	0.00590983	-0.288192
Hunk	-0.578282	2.29976	-4.33346	0.000577202	0.00591184	-0.102738
Clec4a3	-0.801825	2.00884	-4.34635	0.000577446	0.00591184	-0.125955
Nrxn3	0.188258	7.75639	4.33215	0.000578741	0.00592123	-0.386156
Pxmp4	-0.388627	3.61806	-4.33105	0.000580024	0.00593048	-0.0832658
Hoxb4	-0.262365	5.06788	-4.32984	0.000581441	0.00594109	-0.232247
Gckr	0.664358	0.520678	4.32923	0.000582156	0.00594321	-0.326543
Kank1	-0.253389	6.41814	-4.32902	0.000582407	0.00594321	-0.355586
Rexo2	-0.246239	5.45819	-4.32715	0.00058461	0.00595967	-0.279625
LOC102546572	0.19207	6.64111	4.32701	0.000584781	0.00595967	-0.371489
Zc3h7b	-0.167571	8.60925	-4.32583	0.000586172	0.0059689	-0.400007
Klhdc2	0.196324	7.08512	4.3256	0.000586449	0.0059689	-0.389105
Ptp4a3	0.729583	5.5676	4.62006	0.000587617	0.00597665	-0.165155
Ddit4l	-0.682972	1.324	-4.32425	0.000588056	0.00597665	-0.217777
Zfand4	0.315036	3.30725	4.32399	0.000588355	0.00597665	-0.0849441
Rab37	0.765434	4.35333	4.53388	0.000590975	0.00599937	-0.0795423
Epha5	0.264661	5.64466	4.32137	0.000591483	0.00600065	-0.309392
Cep70	0.331418	4.24602	4.31868	0.000594711	0.00602688	-0.159598
Sod1	-0.184778	7.85102	-4.31857	0.000594839	0.00602688	-0.414141
RGD735065	-0.170999	6.03914	-4.31801	0.00059552	0.00602988	-0.351435
Gstk1	-0.263628	4.37132	-4.31759	0.000596016	0.00603086	-0.175896
Trpv3	-0.362283	2.63009	-4.31685	0.000596914	0.00603086	-0.110455
Smpdl3a	-0.338317	5.01992	-4.31676	0.000597019	0.00603086	-0.252052
Kif26b	0.335081	4.25378	4.31665	0.000597157	0.00603086	-0.164319
Ublcp1	0.200478	6.80371	4.31534	0.000598744	0.00604299	-0.401428
Rai2	-0.38939	3.72237	-4.31148	0.000603425	0.00608632	-0.126514
Parp8	0.275989	5.22507	4.30891	0.000606581	0.00611421	-0.290767
Foxf1	0.544693	0.940163	4.30818	0.000607473	0.00611676	-0.294944
Enpp5	0.215831	8.27282	4.30783	0.000607903	0.00611676	-0.437038
Fdx1	-0.374261	3.13131	-4.30775	0.000608006	0.00611676	-0.113091
Dock9	0.280155	7.50542	4.30597	0.000610194	0.00613121	-0.435851
LOC108349710	0.442305	2.10945	4.30572	0.000610502	0.00613121	-0.166193
Pcca	-0.306667	5.04317	-4.30563	0.000610616	0.00613121	-0.276906
Fig4	-0.177527	6.03359	-4.30526	0.000611075	0.00613189	-0.376392
Sh3pxd2b	-0.402769	4.67271	-4.30883	0.00061403	0.0061576	-0.235784
Calb1	-0.440682	6.43986	-4.43178	0.000615907	0.0061687	-0.3506
Rab11fip2	0.276384	4.10836	4.30134	0.000615933	0.0061687	-0.179097
Irgm	-0.922227	3.28228	-4.47263	0.000616671	0.0061687	-0.0761886
Hibadh	-0.191639	6.61369	-4.30059	0.000616868	0.0061687	-0.423154
Crip2	-0.306021	6.13395	-4.30016	0.000617408	0.0061687	-0.393835
LOC100909405	-0.467983	2.98897	-4.30009	0.0006175	0.0061687	-0.128147
LOC102548260	0.40902	3.87679	4.29779	0.000620381	0.00619353	-0.163948
LOC102554909	0.443599	2.36081	4.29604	0.000622579	0.00621152	-0.163629
Ago3	0.196432	6.15399	4.29497	0.00062393	0.00622044	-0.406089
Plcxd3	0.376464	4.93298	4.2973	0.000624268	0.00622044	-0.283869
Anxa3	-0.28362	5.97656	-4.29437	0.000624688	0.00622067	-0.393045
Zfp280d	0.169223	5.59519	4.29069	0.000629356	0.00626318	-0.365956
Cant1	-0.199484	5.25663	-4.29003	0.000630199	0.0062651	-0.332043
Txlng	0.287815	4.37417	4.28987	0.000630407	0.0062651	-0.229778
Ptprv	-0.96765	3.24819	-4.47571	0.000630749	0.0062651	-0.092763
Klhl13	-0.201148	6.63837	-4.28914	0.000631336	0.00626695	-0.447195
Xiap	0.201473	6.42385	4.28866	0.000631943	0.006269	-0.436771
Ncstn	-0.151357	6.44429	-4.28818	0.000632562	0.00627117	-0.43917
Stk16	-0.198568	5.55056	-4.2869	0.000634209	0.00628352	-0.369016
Laptm4b	-0.183005	7.4354	-4.28646	0.00063477	0.00628511	-0.474174
Tmem208	-0.227651	4.27789	-4.28562	0.000635851	0.00629183	-0.227607
Pan3	0.19678	5.78205	4.28363	0.000638417	0.00631323	-0.397752
Ddost	-0.231287	6.62231	-4.28268	0.000639646	0.0063214	-0.459246
Ints3	-0.272237	6.75642	-4.28196	0.000640578	0.00632662	-0.466265
Ncoa3	-0.270912	5.61869	-4.28146	0.000641229	0.00632906	-0.386238
Lyn	-0.313698	3.98927	-4.28048	0.000642507	0.00633454	-0.207485
Pard3	-0.213065	5.30998	-4.2804	0.000642599	0.00633454	-0.356787
Phb	-0.155371	6.36334	-4.27996	0.000643177	0.00633454	-0.45067
LOC102552880	0.468367	4.65053	4.32894	0.000643485	0.00633454	-0.259205
Fam189b	0.288975	5.89054	4.27948	0.000643807	0.00633454	-0.415263
Myh7	-0.632652	2.15984	-4.27861	0.000644939	0.0063417	-0.208721
Ylpm1	0.162241	7.0115	4.27793	0.000645832	0.0063465	-0.482903
Mfsd11	0.200588	5.14848	4.27654	0.000647651	0.00636038	-0.346721
Sgpl1	0.234293	6.34285	4.27593	0.000648454	0.00636427	-0.457067
Angptl2	-1.19881	2.97601	-4.51816	0.000650975	0.00638501	-0.113808
Pik3cg	-0.498271	3.21146	-4.27352	0.000651625	0.00638739	-0.176529
Lhfpl5	0.306417	4.04933	4.27185	0.000653826	0.00640496	-0.229764
Polr1e	-0.339213	3.15149	-4.27051	0.000655609	0.00641534	-0.181533
Tex264	-0.194813	5.8366	-4.27044	0.000655704	0.00641534	-0.42903
Fam171a1	-0.19452	6.47478	-4.26961	0.000656801	0.00642205	-0.477957
Safb2	0.287688	6.64782	4.26884	0.000657828	0.00642808	-0.487848
Slitrk5	0.29064	4.98637	4.26778	0.000659244	0.0064379	-0.344927
Ppdpf	-0.200039	5.61035	-4.26671	0.000660676	0.00644787	-0.415087
Atm	0.202364	5.4524	4.2656	0.00066216	0.00645833	-0.401241
Atp6v1g2	0.245196	8.44367	4.26285	0.000665869	0.00648654	-0.527025
B2m	-0.431396	8.44007	-4.40667	0.000665881	0.00648654	-0.458636
Ankrd13b	0.34793	5.59365	4.27736	0.000669067	0.00650852	-0.41703
Car8	-0.608032	3.46309	-4.2921	0.000669242	0.00650852	-0.196949
Grsf1	0.150887	7.31868	4.26025	0.000669383	0.00650852	-0.524956
Dnal4	-0.25971	4.46699	-4.25924	0.000670748	0.00651474	-0.300315
Thbs1	-1.17928	2.97857	-4.49671	0.000670855	0.00651474	-0.141495
Arhgdia	-0.18838	8.38185	-4.25824	0.000672106	0.00652285	-0.536475
Cachd1	-0.230384	5.78688	-4.25747	0.000673169	0.00652911	-0.450231
Slc16a1	-0.244015	6.82733	-4.25651	0.00067448	0.0065375	-0.52009
Ikbkap	0.207255	6.51956	4.25622	0.000674869	0.0065375	-0.507135
RGD1310769	-0.254174	4.89145	-4.25568	0.000675616	0.0065407	-0.358035
Ptdss2	-0.166097	6.60925	-4.25529	0.000676141	0.00654156	-0.513794
Plekhb2	0.159411	9.17713	4.255	0.000676541	0.00654156	-0.537942
Sulf1	-0.976388	5.73553	-4.65384	0.000677575	0.00654752	-0.271967
RGD1559909	-0.223588	5.03917	-4.25287	0.000679465	0.00656174	-0.380998
Naga	-0.250975	5.63349	-4.25227	0.000680298	0.00656574	-0.445863
LOC102547219	0.231841	4.64132	4.25162	0.000681198	0.00656651	-0.336102
Nadk	-0.250956	5.90682	-4.2516	0.000681217	0.00656651	-0.472556
Cdc42ep4	-0.655071	6.70328	-4.55132	0.00068215	0.00656726	-0.386834
Ric8b	0.165362	6.19903	4.25092	0.000682158	0.00656726	-0.497556
Mei4	-0.680014	1.27306	-4.25064	0.000682553	0.00656726	-0.344283
RGD1310352	-0.27809	6.78115	-4.24927	0.000684452	0.0065815	-0.532785
Slc22a5	-0.523836	4.22398	-4.30044	0.000686009	0.00658904	-0.270873
Zfp40	0.302669	3.98362	4.24788	0.000686384	0.00658904	-0.269434
Eef1d	-0.176015	5.92088	-4.24779	0.000686498	0.00658904	-0.481758
Ak1	-0.273467	5.83355	-4.2465	0.000688307	0.00660235	-0.476189
Tarsl2	0.306051	4.72385	4.24478	0.000690714	0.00661826	-0.35893
Ggps1	0.211496	5.54522	4.24451	0.00069108	0.00661826	-0.45261
RGD1307235	0.195497	6.36176	4.2444	0.000691233	0.00661826	-0.521567
Tbrg1	-0.232399	4.32788	-4.24233	0.000694154	0.00664217	-0.317173
Heg1	-0.487026	6.61701	-4.42124	0.000694899	0.006645	-0.455303
Shisa3	-0.599579	0.368634	-4.24151	0.000695299	0.006645	-0.485307
Arhgef26	-0.295336	5.18546	-4.24002	0.00069741	0.00666112	-0.422672
Ctsk	-1.04876	3.50969	-4.48294	0.000698115	0.00666379	-0.1694
Zcchc16	0.329861	3.71487	4.23904	0.000698796	0.00666622	-0.263355
Zim1	0.52203	4.26053	4.29316	0.000699925	0.00667142	-0.292622
Mau2	0.218853	6.68279	4.23781	0.000700543	0.00667142	-0.551965
RGD1307100	0.151842	8.40284	4.23767	0.00070074	0.00667142	-0.577786
Rap1a	-0.240277	6.40486	-4.23746	0.000701044	0.00667142	-0.538081
Isca1	0.194664	7.40354	4.23694	0.000701784	0.00667441	-0.573102
Ppp1r9b	-0.167122	8.32179	-4.23641	0.000702526	0.00667741	-0.58045
RGD1309779	0.27005	4.17229	4.23399	0.000705986	0.00670623	-0.315616
Tubb6	-0.766667	3.22743	-4.32052	0.000706459	0.00670665	-0.222976
Hoga1	-0.33815	3.1881	-4.23217	0.000708599	0.00671903	-0.25257
Vwa7	0.610215	4.57384	4.37313	0.000709051	0.00671903	-0.303735
P2ry6	-0.582321	2.17985	-4.23185	0.000709063	0.00671903	-0.288168
Tmem263	-0.226758	5.83401	-4.23156	0.000709479	0.00671903	-0.506237
Synpo	-0.315813	4.95564	-4.23073	0.000710677	0.00672631	-0.414288
Gfpt2	-0.383115	3.06695	-4.22865	0.000713676	0.00675062	-0.258012
Zfp612	0.263952	7.15914	4.22821	0.000714319	0.00675089	-0.586012
Abcg2	1.14527	3.82743	4.5359	0.000715188	0.00675089	-0.181799
Vcl	-0.234958	6.62923	-4.22753	0.000715307	0.00675089	-0.570125
Slc2a10	-1.02459	3.06357	-4.41609	0.000715429	0.00675089	-0.207086
Meltf	-0.642755	1.88544	-4.22645	0.000716872	0.00676044	-0.321138
Aldh9a1	-0.234934	5.33608	-4.22594	0.000717617	0.00676339	-0.467508
Orai2	0.271946	5.98374	4.22543	0.000718358	0.0067663	-0.531282
Bbs2	0.191738	5.7079	4.2221	0.000723239	0.00680768	-0.513458
Slc1a3	-0.278958	9.29619	-4.22168	0.000723846	0.00680768	-0.603617
Ddb1	-0.170415	8.12037	-4.22154	0.000724055	0.00680768	-0.610305
Reps1	0.222093	4.90568	4.21899	0.000727808	0.00683487	-0.432082
Isg15	-1.03374	1.59469	-4.29179	0.000728164	0.00683487	-0.352378
Coq9	-0.209215	5.73978	-4.21869	0.000728255	0.00683487	-0.523278
Erh	-0.188799	5.68	-4.21766	0.000729782	0.0068451	-0.519682
Fcgrt	-0.502397	4.98362	-4.31496	0.000732643	0.00686781	-0.401192
LOC108353239	0.42771	4.90869	4.25709	0.000733238	0.00686928	-0.419137
Cdh12	0.43871	3.96462	4.21485	0.000733951	0.00687185	-0.330125
Zfp280c	0.292688	4.21447	4.21369	0.000735687	0.00688399	-0.359427
Med28	-0.250556	4.78336	-4.21241	0.000737596	0.00689767	-0.430191
Mfsd1	-0.206297	5.76132	-4.21188	0.000738397	0.00689767	-0.538903
Plin2	-0.274034	4.81636	-4.21166	0.000738724	0.00689767	-0.435476
LOC102553657	0.754985	0.826381	4.21141	0.000739107	0.00689767	-0.465645
Adipor1	-0.229273	6.7188	-4.21124	0.000739351	0.00689767	-0.606801
Agt	-0.309974	9.7577	-4.23658	0.000740053	0.00689956	-0.607012
Dap	-0.632471	4.86507	-4.39371	0.000740434	0.00689956	-0.360738
Sctr	-0.807783	2.04791	-4.23565	0.000741418	0.00690462	-0.331116
Hars	0.183676	6.68852	4.20823	0.000743884	0.00692346	-0.611667
MGC108823	-0.801376	0.840508	-4.20794	0.000744326	0.00692346	-0.469384
Rab28	-0.159268	6.41138	-4.20747	0.000745032	0.00692592	-0.598812
Olfml2b	-0.498317	4.2152	-4.24368	0.000746729	0.00693654	-0.356751
LOC102550474	0.578857	1.2712	4.20595	0.000747347	0.00693654	-0.417337
Gstm1	-0.390865	6.86923	-4.2993	0.000747888	0.00693654	-0.577655
Gyg1	-0.273989	5.4596	-4.20555	0.000747945	0.00693654	-0.52109
Nat6	-0.510882	4.98579	-4.31156	0.000749536	0.00694718	-0.419927
Abhd6	-0.253919	5.71234	-4.20245	0.000752675	0.0069693	-0.552917
Hmgcs2	-0.850888	6.12143	-4.56856	0.000752921	0.0069693	-0.418832
Rpl39	-0.232095	4.57733	-4.20207	0.000753257	0.0069693	-0.425407
LOC108352302	0.703459	1.73744	4.20088	0.000755082	0.00697846	-0.377916
Ss18	-0.244711	5.85406	-4.2008	0.000755204	0.00697846	-0.569421
Csnk1g3	0.192882	6.20795	4.20048	0.000755694	0.00697846	-0.599077
Fbxl7	-0.428745	3.42882	-4.20026	0.000756029	0.00697846	-0.31915
Tomm40	-0.164293	6.14379	-4.19967	0.000756929	0.00698242	-0.596028
Ddrgk1	-0.196131	6.19866	-4.1994	0.000757351	0.00698242	-0.600604
Cacna1a	0.197009	7.30174	4.19829	0.000759053	0.00699	-0.649095
L3mbtl2	0.19354	5.99323	4.19829	0.000759065	0.00699	-0.586677
Chmp5	-0.175697	6.77437	-4.1979	0.000759657	0.00699134	-0.636001
Cyfip1	-0.242451	6.50059	-4.1974	0.000760431	0.00699436	-0.623957
Fcho1	0.389603	5.97658	4.26418	0.000762682	0.00701095	-0.556068
Fbxo41	0.247504	5.61523	4.19528	0.000763713	0.00701631	-0.557526
Atp2b1	0.176206	7.67883	4.19349	0.000766507	0.00703784	-0.663921
Glg1	0.156976	7.92355	4.19235	0.000768283	0.00705002	-0.66821
Col2a1	0.490239	3.05143	4.1905	0.000771177	0.00707243	-0.327936
Tti1	-0.270538	5.25986	-4.19004	0.000771897	0.0070749	-0.530168
Prkg2	0.461755	3.23242	4.18968	0.000772463	0.00707595	-0.331963
Mapk11	0.342998	5.02419	4.18873	0.000773953	0.00708545	-0.505024
Nfkb2	-0.575591	2.8458	-4.18633	0.000777738	0.00711594	-0.33708
Ypel4	0.226367	5.77137	4.1849	0.000779992	0.0071324	-0.593542
Pgm2	-0.278038	4.1193	-4.184	0.000781423	0.0071356	-0.406481
Hcrtr2	0.568831	2.32846	4.18388	0.000781623	0.0071356	-0.362053
Fbxl20	0.235411	6.52247	4.18382	0.000781709	0.0071356	-0.652406
Ccdc136	0.191842	7.13663	4.18307	0.000782904	0.00714235	-0.676401
Slco3a1	-0.413926	5.93362	-4.2681	0.000783565	0.00714422	-0.57073
Rasa1	0.170825	5.84874	4.18215	0.000784364	0.00714734	-0.606394
Relt	0.353337	4.36425	4.18081	0.000786503	0.00716096	-0.440162
LOC108349985	0.730614	1.175	4.18028	0.00078736	0.00716096	-0.471225
Tet2	0.224716	5.44252	4.17991	0.000787948	0.00716096	-0.570475
Snrpg	-0.280486	3.6181	-4.17972	0.000788251	0.00716096	-0.369053
Acss3	-0.468551	4.7221	-4.23687	0.000788381	0.00716096	-0.459734
Dact1	-0.587313	2.80419	-4.1795	0.000788601	0.00716096	-0.350261
Slamf8	-0.665947	0.865519	-4.17872	0.000789859	0.00716822	-0.512046
Grk3	0.213232	6.03816	4.17839	0.000790389	0.00716888	-0.630128
Rpl18	-0.196474	6.74364	-4.17754	0.000791757	0.00717713	-0.675662
Rasgef1a	0.212354	5.21146	4.17675	0.000793028	0.00718206	-0.551356
Elac1	0.206344	4.51864	4.17663	0.000793218	0.00718206	-0.46806
Cbs	-0.547526	6.94655	-4.40555	0.00079553	0.00719884	-0.576429
Kcnip3	0.275315	5.12789	4.17401	0.000797458	0.00721211	-0.546826
Bptf	0.145171	7.17902	4.17171	0.000801193	0.00724171	-0.700241
Trim65	0.249653	4.29943	4.17102	0.00080233	0.0072478	-0.452229
Tspyl4	0.225785	8.07933	4.16742	0.000808216	0.0072812	-0.719024
Zmym2	0.171263	6.73741	4.16722	0.000808551	0.0072812	-0.696199
Gabrg2	0.357778	7.24327	4.23769	0.000808679	0.0072812	-0.675382
Stx3	0.281643	4.91074	4.16713	0.000808692	0.0072812	-0.534619
Pald1	-0.432423	4.55321	-4.19218	0.000808863	0.0072812	-0.478346
Ptprg	0.201146	6.07285	4.16681	0.000809224	0.0072812	-0.656189
Lrp5	-0.412743	4.74877	-4.19192	0.00080928	0.0072812	-0.502973
Sox2	-0.337596	6.08413	-4.19533	0.000810994	0.00729242	-0.644104
Eif4b	0.202631	7.65155	4.16378	0.000814233	0.00731735	-0.723418
Lypla1	-0.248406	5.42547	-4.16347	0.000814741	0.00731772	-0.601328
Cyb561d2	-0.254149	3.79037	-4.16212	0.000816973	0.00733356	-0.4161
LOC102551251	0.537924	3.83959	4.1917	0.00081958	0.00735261	-0.409554
Cdyl2	0.258252	4.9046	4.16029	0.000820033	0.00735261	-0.547574
Pcf11	0.206798	5.4921	4.15954	0.000821276	0.00735615	-0.616334
Il6r	-0.342028	3.32408	-4.15949	0.000821368	0.00735615	-0.391125
Dhrs1	0.368749	4.73286	4.15775	0.000824277	0.00737636	-0.530458
Tmem223	-0.254683	4.14587	-4.15749	0.00082472	0.00737636	-0.460816
LOC103694111	0.582739	2.5241	4.1573	0.000825038	0.00737636	-0.399187
Slc39a1	-0.261855	5.99408	-4.15698	0.000825571	0.00737692	-0.669228
Cklf	-0.567944	0.756253	-4.15647	0.000826431	0.0073804	-0.561643
RGD1305645	-1.15856	3.57986	-4.43993	0.000827149	0.0073826	-0.311849
Tmem164	-0.344162	4.61886	-4.15569	0.000827742	0.00738369	-0.520664
Cacng4	-0.293238	4.32701	-4.15366	0.000831159	0.00740995	-0.489144
Atf6b	-0.222015	6.21342	-4.15285	0.000832535	0.00741687	-0.694885
Ankrd10	0.320274	6.32941	4.17758	0.000832882	0.00741687	-0.690424
Nqo1	-0.3185	4.75081	-4.14937	0.000838446	0.0074603	-0.549775
Ssx2ip	0.215032	5.37315	4.14922	0.000838712	0.0074603	-0.624053
Hmgcll1	0.245774	5.08604	4.1477	0.00084131	0.00747448	-0.59426
Rtn4rl2	0.741603	0.496463	4.14749	0.000841661	0.00747448	-0.612251
Slc25a15	-0.193793	4.56193	-4.14741	0.000841799	0.00747448	-0.53081
Cacng2	0.263778	5.72274	4.14705	0.000842414	0.00747448	-0.664415
Acss1	0.223366	5.31271	4.14689	0.000842692	0.00747448	-0.622006
Senp7	0.221039	5.12988	4.14648	0.000843402	0.00747654	-0.601995
LOC100910788	-0.252448	5.35197	-4.1459	0.000844392	0.00748108	-0.628208
Cand2	-0.604884	4.1995	-4.247	0.000846269	0.00748929	-0.446173
LOC691113	0.254168	4.0726	4.14481	0.000846274	0.00748929	-0.477192
Osbp2	0.268129	5.53184	4.14359	0.00084838	0.00750368	-0.651937
Gper1	-0.444477	2.61739	-4.14253	0.000850199	0.00751553	-0.421942
LOC108352957	0.237574	4.38967	4.14162	0.000851785	0.0075253	-0.52045
Palm2	0.288045	4.25544	4.14061	0.000853542	0.00753657	-0.505935
Slc17a5	0.273284	4.5721	4.13882	0.000856649	0.00755974	-0.548322
Rassf10	-0.513341	1.80425	-4.13824	0.000857667	0.00756447	-0.477932
Myh14	-0.310558	6.87302	-4.15995	0.000863367	0.00760495	-0.752944
Pkib	-0.497124	2.81569	-4.13484	0.000863626	0.00760495	-0.430877
Zdhhc20	0.293494	6.25318	4.13479	0.000863713	0.00760495	-0.733631
Trmt6	0.268504	3.95262	4.1337	0.00086564	0.00761763	-0.485872
Arrdc3	0.372561	6.17319	4.19556	0.000868182	0.00763487	-0.701125
Mocs2	-0.204429	5.75449	-4.13203	0.000868574	0.00763487	-0.697764
LOC501038	0.439191	4.16851	4.13758	0.00086927	0.0076367	-0.509522
Kif21a	0.210655	8.47932	4.12927	0.000873469	0.00766929	-0.795706
Fastkd1	0.403308	4.6184	4.14112	0.000874308	0.00767236	-0.567054
Kif1b	0.196569	9.59815	4.12844	0.000874951	0.0076737	-0.787636
Kcnab1	0.316072	6.27439	4.14918	0.000877263	0.00768447	-0.739283
Arhgdib	-0.498721	3.77842	-4.13876	0.000877293	0.00768447	-0.476016
Avl9	0.231576	6.72305	4.12667	0.00087811	0.00768447	-0.77689
Dusp10	0.511443	3.07223	4.12643	0.000878536	0.00768447	-0.445856
Mid2	0.214747	5.60961	4.12638	0.000878632	0.00768447	-0.694599
LOC102552985	-0.682886	1.56891	-4.12531	0.000880549	0.00768771	-0.520632
Itga6	-0.274652	6.50727	-4.12529	0.000880588	0.00768771	-0.769022
Ghr	-0.3769	3.95491	-4.12515	0.00088084	0.00768771	-0.501995
Krcc1	-0.286892	5.02394	-4.12508	0.000880965	0.00768771	-0.631561
Hfm1	0.591505	2.69895	4.12276	0.000885129	0.00771975	-0.455127
Cacna1h	0.29956	5.78633	4.12243	0.000885736	0.00772074	-0.719441
Luzp2_1	-0.243147	7.79063	-4.12178	0.000886901	0.00772411	-0.809309
Ppp3cb	0.195345	7.45613	4.12163	0.000887183	0.00772411	-0.805911
Cabp1	0.279742	6.2777	4.12136	0.00088767	0.00772411	-0.762391
Calm1	0.184127	10.1399	4.12112	0.000888095	0.00772411	-0.79426
Unc5a	0.266705	5.45919	4.1196	0.000890846	0.00774374	-0.69218
Sec24a	0.270211	4.29778	4.11908	0.000891804	0.0077462	-0.55299
Exoc3l4	-0.667675	2.53726	-4.12309	0.000892119	0.0077462	-0.465938
Nwd2	0.318617	4.33428	4.11735	0.000894952	0.0077665	-0.5605
Cpq	-0.309367	4.484	-4.11707	0.000895466	0.00776663	-0.579785
Ecsit	-0.202307	5.24961	-4.11676	0.000896018	0.00776663	-0.674972
Whsc1l1	0.181696	6.98783	4.11652	0.000896455	0.00776663	-0.806618
Camk1d	0.336592	6.06932	4.14541	0.000897404	0.00776951	-0.742371
Slc19a2	-0.387163	5.40756	-4.16053	0.000897779	0.00776951	-0.671817
LOC108351556	0.640833	3.35468	4.16242	0.000898577	0.00777212	-0.457571
Chic1	0.220681	6.55196	4.11472	0.000899761	0.00777807	-0.792918
Ndrg4	0.240397	10.9524	4.11354	0.000901926	0.00779248	-0.795163
Vsnl1	0.300473	9.21299	4.13725	0.000903108	0.0077984	-0.811002
Rasgrf2	0.446706	3.81979	4.10998	0.000908485	0.0078405	-0.517376
Slc6a5	0.463895	7.86685	4.28344	0.000909249	0.00784278	-0.748211
Rsf1	0.178687	6.40754	4.10833	0.000911546	0.00785804	-0.797547
Pdia4	-0.311416	5.94558	-4.11708	0.000912022	0.00785804	-0.758166
Elk1	0.192177	5.08464	4.10602	0.000915851	0.00788287	-0.677061
Kdelc1	0.308811	4.06684	4.10584	0.000916194	0.00788287	-0.551553
Ssr2	-0.214247	5.48525	-4.10569	0.000916473	0.00788287	-0.723014
Rab31	-0.236293	7.17376	-4.10532	0.000917162	0.00788287	-0.833693
Gtse1	-0.518971	2.62552	-4.1051	0.000917569	0.00788287	-0.488832
Flt4	0.650618	1.65549	4.10491	0.000917924	0.00788287	-0.547307
Psme1	-0.35127	5.74415	-4.13461	0.000918838	0.0078864	-0.736295
Lrrk1	-0.402138	3.7536	-4.10396	0.000919701	0.00788949	-0.523263
Ide	-0.181711	6.13644	-4.10282	0.000921847	0.00790356	-0.789607
LOC108352894	-0.50036	2.00031	-4.10229	0.000922846	0.00790717	-0.525195
Ppm1l	0.205701	6.92137	4.10206	0.000923278	0.00790717	-0.833742
Hecw2	0.438514	6.1126	4.22237	0.000925739	0.00792392	-0.730655
Kifap3	0.198924	8.31575	4.09973	0.000927678	0.00793618	-0.855676
Acot3	-0.375164	3.6843	-4.09902	0.000929014	0.00794327	-0.526922
Zfp703	-0.330318	4.94993	-4.09869	0.00092963	0.00794421	-0.674394
Wfdc2	0.510061	3.24554	4.09718	0.000932508	0.00796003	-0.504137
LOC685680	0.565682	2.80519	4.09703	0.000932784	0.00796003	-0.499651
Cnpy1	-0.845735	2.28853	-4.15063	0.000933007	0.00796003	-0.503936
Mxra7	-0.346318	5.58595	-4.1201	0.000934775	0.00797077	-0.740286
Tapbp	-0.378804	4.19365	-4.09539	0.000935922	0.00797155	-0.585924
Atrn	-0.16476	9.36676	-4.09517	0.000936343	0.00797155	-0.857579
Snapc2	-0.226129	5.86646	-4.09514	0.000936392	0.00797155	-0.782002
Evc2	-0.453665	2.80942	-4.09466	0.000937303	0.00797497	-0.503859
Phf24	0.242864	7.41456	4.094	0.000938562	0.00798112	-0.860887
Cntnap5c	0.435648	3.94079	4.09375	0.000939046	0.00798112	-0.560427
Sardh	-0.3398	4.56908	-4.09282	0.000940841	0.00799204	-0.637819
Chpf	-0.201522	6.87716	-4.0925	0.000941443	0.00799283	-0.85162
Gldn	-0.944086	2.91336	-4.23722	0.000942283	0.00799562	-0.464955
Rab27b	0.282148	5.83061	4.09091	0.000944503	0.00801012	-0.786815
Ino80	0.190364	5.39141	4.09029	0.000945696	0.0080159	-0.743564
Ankrd35	0.405562	3.64388	4.08929	0.000947639	0.00802802	-0.541985
Pdzrn3	-0.517303	4.85898	-4.19436	0.000950283	0.00804607	-0.633402
Zfp26	0.248529	4.64161	4.08682	0.000952424	0.00805984	-0.659528
Zbtb20	-0.453345	5.06246	-4.15789	0.000956195	0.00808738	-0.679781
LOC108351917	0.458433	2.52037	4.084	0.000957917	0.00809757	-0.530018
Btrc	0.176616	7.25114	4.08359	0.000958707	0.00809986	-0.879145
Cd274	0.441908	3.66965	4.08333	0.000959221	0.00809986	-0.555193
RGD1309534	-0.224798	4.71704	-4.08156	0.000962686	0.00812473	-0.679732
Il13ra1	-0.571768	3.14438	-4.08384	0.000967566	0.00815927	-0.533008
Peg3	0.247042	10.7737	4.07896	0.000967819	0.00815927	-0.868072
Sptssa	-0.237496	5.31678	-4.07589	0.000973901	0.00820512	-0.763779
Lzts3	0.20536	6.49746	4.07568	0.000974305	0.00820512	-0.868497
Zfp605	0.422341	2.51442	4.07529	0.000975089	0.00820731	-0.54578
Nceh1	0.25179	6.2664	4.0743	0.000977062	0.00821745	-0.856291
Cxxc5	-0.172194	6.67278	-4.07416	0.000977344	0.00821745	-0.880651
Lpcat3	-0.297257	4.94374	-4.07336	0.00097893	0.00822351	-0.724044
Fam83d	0.767262	2.32332	4.10193	0.000979115	0.00822351	-0.549685
NEWGENE_1565505	-0.655415	2.50399	-4.07278	0.000980085	0.00822445	-0.550561
Scarb2	-0.141445	7.30122	-4.07269	0.000980276	0.00822445	-0.902143
Nutf2	-0.172079	5.83762	-4.07063	0.000984396	0.00825216	-0.828615
Ipo11	0.204606	5.57189	4.07051	0.000984633	0.00825216	-0.802349
Mbtd1	0.290677	4.85464	4.07004	0.000985584	0.00825572	-0.719396
Mmp19	-0.581893	2.04734	-4.0694	0.000986866	0.00826204	-0.579197
Adamts13	-0.955059	0.862596	-4.09224	0.000988645	0.00827251	-0.687771
Zfp182	0.275602	4.35954	4.06751	0.000990691	0.00828374	-0.661234
Zkscan2	0.45299	3.0175	4.06714	0.000991437	0.00828374	-0.554362
Ngef	-0.233555	6.14239	-4.06707	0.000991574	0.00828374	-0.861695
Fuca1	-0.38214	6.13237	-4.13695	0.000995236	0.00830744	-0.827605
Tab3	0.337368	4.88194	4.0649	0.000995979	0.00830744	-0.732623
Gas7	-0.491704	6.21746	-4.23257	0.000996559	0.00830744	-0.787882
Sf3b5	-0.202679	5.1644	-4.0645	0.000996784	0.00830744	-0.768976
Acadl	-0.203985	5.65862	-4.06385	0.000998123	0.00830744	-0.824704
Ltk	0.719159	2.66293	4.09532	0.00099828	0.00830744	-0.553108
Fgfr3	0.245428	7.69759	4.06376	0.000998308	0.00830744	-0.925444
Maf	-0.396857	5.63022	-4.12808	0.000998721	0.00830744	-0.789302
Kazald1	-0.62424	0.835707	-4.06333	0.000999184	0.00830744	-0.700663
RGD1563941	-0.564704	1.09335	-4.06304	0.000999769	0.00830789	-0.671436
LOC102549342	0.572476	2.6326	4.06189	0.00100212	0.00832121	-0.566328
Gpc6	-0.413256	3.76061	-4.06151	0.00100289	0.00832121	-0.60493
Cspp1	0.376604	5.51687	4.10582	0.00100425	0.00832121	-0.792547
LOC100912002	0.443697	3.3033	4.06082	0.00100431	0.00832121	-0.574426
Tnfrsf11a	0.512667	4.5013	4.13378	0.00100443	0.00832121	-0.65712
Nckap1l	-0.488208	4.3768	-4.11205	0.00100456	0.00832121	-0.651895
Dpp10	0.256239	6.81016	4.05886	0.00100834	0.0083458	-0.916845
LOC689065	0.664274	2.00825	4.05874	0.00100859	0.0083458	-0.600243
Edc4	0.149222	6.20645	4.05778	0.00101056	0.00835511	-0.885493
Tmem238	-0.497848	2.135	-4.05767	0.00101078	0.00835511	-0.59437
Cyp2t1	-0.394059	2.67877	-4.05641	0.0010134	0.00837232	-0.575135
Svbp	-0.341479	2.90792	-4.0551	0.00101611	0.00839028	-0.575595
Dhx57	0.217966	6.29894	4.05325	0.00101994	0.00841749	-0.900998
Rps24	-0.163451	7.1352	-4.05226	0.00102202	0.00842723	-0.939925
Hexim1	-0.262192	5.88041	-4.05217	0.0010222	0.00842723	-0.86922
Ctdnep1	-0.168346	5.81358	-4.0498	0.00102716	0.0084637	-0.868145
Atf2	0.191305	6.07368	4.04737	0.00103227	0.00850132	-0.895891
Emilin1	-0.46602	3.78325	-4.04536	0.00103653	0.00852076	-0.637621
LOC100911266	0.266413	4.18943	4.04526	0.00103674	0.00852076	-0.683564
Hyal1	-0.660315	5.7257	-4.29444	0.00103701	0.00852076	-0.745933
Nfatc2	0.30252	5.75924	4.04505	0.00103719	0.00852076	-0.871772
Fgd4	0.320171	4.7217	4.04497	0.00103735	0.00852076	-0.75171
Pgm1	-0.150921	6.64731	-4.04369	0.00104006	0.00853856	-0.940927
Kcnj8	0.431457	2.23184	4.04298	0.00104156	0.00854615	-0.614997
Add2	0.204834	7.85656	4.04274	0.00104208	0.00854615	-0.969282
Vps13c	0.182337	7.40802	4.04197	0.00104372	0.00855509	-0.965832
S100a13	-0.295675	5.20566	-4.04159	0.00104453	0.00855729	-0.818892
Cracr2a	0.398046	2.21348	4.03938	0.00104926	0.00859155	-0.622272
Mib1	0.158532	6.77357	4.03899	0.00105009	0.00859382	-0.955787
Gpr84	-0.465374	1.90176	-4.03838	0.0010514	0.0086001	-0.642014
Mgst2	0.607064	0.367336	4.03724	0.00105385	0.00861557	-0.801558
Pappa	0.512748	2.58768	4.03645	0.00105556	0.00862505	-0.613151
Xdh	0.6565	3.79723	4.13128	0.00105714	0.00863353	-0.617295
Mospd3	-0.283078	4.1994	-4.03434	0.00106011	0.00865325	-0.706012
Parp12	-0.662852	3.10289	-4.07603	0.00106082	0.0086545	-0.602523
Lgr6	-0.300562	4.29874	-4.03355	0.00106183	0.00865714	-0.719767
Eva1b	-0.52824	2.70766	-4.03336	0.00106225	0.00865714	-0.616355
Accs	0.451695	2.50333	4.03273	0.00106361	0.00866066	-0.622171
Rsu1	-0.226195	4.86992	-4.03265	0.00106378	0.00866066	-0.795881
Iqcb1	0.183866	5.12286	4.03163	0.00106599	0.00867414	-0.829423
Dhrs4	-0.381403	3.21504	-4.03126	0.0010668	0.0086762	-0.626025
Sox4	-0.302339	4.89263	-4.03078	0.00106785	0.00868023	-0.801974
Zfp654	0.255924	4.76229	4.03005	0.00106944	0.00868737	-0.786955
LOC688869	-0.185154	7.19641	-4.02958	0.00107047	0.00868737	-0.986968
Hoxb2	-0.260072	5.01137	-4.02937	0.00107094	0.00868737	-0.819975
Lxn	-0.76499	4.94743	-4.28201	0.00107095	0.00868737	-0.690406
Pabpn1	0.235461	7.26122	4.02885	0.00107208	0.00869204	-0.989664
Txndc15	-0.174917	5.77825	-4.0283	0.00107329	0.00869734	-0.907854
Uchl5	0.242785	4.93564	4.02725	0.00107558	0.00871142	-0.81469
Serpinh1	-0.98587	6.17449	-4.40131	0.00107896	0.00873419	-0.760845
Arfip1	-0.175995	5.22945	-4.02547	0.00107951	0.00873419	-0.854451
Pnlip	-0.488172	3.40596	-4.02437	0.00108194	0.00874937	-0.648118
Wdr37	0.210588	6.29733	4.02343	0.00108401	0.00876155	-0.960905
Hecw1	0.311039	6.57278	4.04961	0.00108489	0.0087642	-0.96423
Sh3bp4	-0.330222	5.36344	-4.02935	0.00108566	0.00876431	-0.871193
Arhgef11	0.190811	7.70624	4.02252	0.00108603	0.00876431	-1.00881
Cd68	-0.799706	1.69085	-4.03681	0.00108686	0.00876653	-0.682439
Synj1	0.205574	8.61819	4.02117	0.00108902	0.00877945	-1.01319
Kcnh7	0.328136	5.89858	4.04316	0.00109153	0.00879373	-0.922942
S1pr1	-0.371764	6.6242	-4.09735	0.00109192	0.00879373	-0.946806
Mrgprx3	-0.688707	0.435621	-4.01945	0.00109286	0.00879679	-0.820591
Ctnnd2	-0.200041	7.36095	-4.01786	0.00109644	0.00882104	-1.01373
RGD1560065	-0.22334	4.76886	-4.01672	0.00109898	0.00883701	-0.81441
Id3	-0.571311	5.19403	-4.18406	0.00109998	0.00884048	-0.785043
Map2k6	-0.283154	5.22426	-4.0157	0.00110128	0.00884635	-0.872671
Ppp1r12c	0.147213	6.98412	4.01447	0.00110405	0.00885614	-1.01228
Rsbn1	0.218173	5.33194	4.01447	0.00110406	0.00885614	-0.88795
Disp2	0.23363	9.41603	4.01441	0.00110419	0.00885614	-1.01987
Arrb1	0.143387	8.78984	4.01258	0.00110833	0.0088812	-1.02954
Sec61g	-0.245896	4.56477	-4.01228	0.001109	0.0088812	-0.796246
Gamt	-0.325438	5.53244	-4.02302	0.00110902	0.0088812	-0.908515
Stau2	0.177701	7.24533	4.00823	0.00111823	0.0089479	-1.03105
Prrt1	-0.33722	7.00928	-4.06394	0.00111849	0.0089479	-0.996171
Mapk12	0.273893	4.79563	4.00366	0.00112872	0.00902513	-0.843247
Igf1	-0.557687	4.7906	-4.13421	0.00113251	0.0090508	-0.780891
Slc38a2	0.389091	8.14525	4.11141	0.00113706	0.00907553	-0.998664
Cib1	-0.433984	3.93078	-3.99998	0.00113726	0.00907553	-0.740155
Mta3	0.192238	7.09764	3.99994	0.00113734	0.00907553	-1.04451
Ikzf2	0.285153	3.54676	3.99913	0.00113924	0.00908606	-0.706072
Atp6v1h	0.22466	7.33318	3.99718	0.00114379	0.0091177	-1.05495
Slc29a1	0.321659	4.53479	3.99345	0.00115254	0.00918283	-0.828656
Ccdc90b	-0.186677	4.52553	-3.99294	0.00115375	0.00918543	-0.82947
Cbx1	-0.293766	4.95602	-3.99279	0.00115411	0.00918543	-0.885319
Kcng4	-0.38581	6.4737	-4.08064	0.00115463	0.00918543	-0.987961
Etnppl	0.812086	5.11368	4.27295	0.00115707	0.00919782	-0.769653
Pgpep1	-0.298201	4.29217	-3.99141	0.00115736	0.00919782	-0.801223
Acr	0.766719	0.433898	3.99094	0.00115849	0.00920211	-0.865891
Jade2	0.257933	5.99867	3.98967	0.00116149	0.00922131	-1.0052
LOC103693255	0.565237	0.753086	3.98846	0.00116437	0.0092354	-0.830602
Slitrk2	0.220571	5.11707	3.98843	0.00116445	0.0092354	-0.914443
Atr	0.39421	4.36168	3.9874	0.00116689	0.00925011	-0.817116
Myef2	0.155488	7.08011	3.98694	0.00116799	0.00925409	-1.07036
Copz1	-0.186667	6.56236	-3.9852	0.00117216	0.00927677	-1.05442
Usp28	0.240905	4.67324	3.98515	0.00117229	0.00927677	-0.863982
Afap1l2	-0.301032	3.84007	-3.98501	0.00117263	0.00927677	-0.760093
Glb1	-0.272451	5.32712	-3.98363	0.00117595	0.00929834	-0.94873
Esrrg	0.27829	6.4159	3.98325	0.00117686	0.00930087	-1.0494
Stradb	0.229368	4.85999	3.98135	0.00118144	0.00933238	-0.896088
Nckap5	-0.467063	2.36687	-3.97974	0.00118534	0.00935847	-0.72109
Ip6k1	0.15913	7.80669	3.97924	0.00118656	0.00936333	-1.09718
Usp9x	0.16115	9.00539	3.97886	0.00118746	0.00936574	-1.09592
Fndc3b	-0.340863	5.00559	-3.97821	0.00118905	0.00937357	-0.920153
Tmcc1	0.173834	5.64885	3.97735	0.00119114	0.00938344	-0.996944
Cxcl12	0.35987	5.98506	4.0289	0.0011915	0.00938344	-1.00155
Pogk	-0.259298	5.84304	-3.97626	0.00119381	0.00939692	-1.01807
Pc	-0.202125	7.65617	-3.97561	0.00119539	0.00940465	-1.10304
Cit	0.216989	7.00421	3.97371	0.00120005	0.0094329	-1.09495
Nin	0.287049	3.85486	3.97365	0.00120019	0.0094329	-0.783496
Cpne5	-0.42992	5.60359	-4.06437	0.00120259	0.00943714	-0.953579
Etfa	-0.350895	6.12952	-4.02246	0.00120261	0.00943714	-1.02382
Tlx3	-0.540918	1.85171	-3.97246	0.00120313	0.00943714	-0.759015
Cidea	-0.616942	0.899349	-3.97239	0.0012033	0.00943714	-0.840421
RGD621098	0.247726	4.64011	3.97221	0.00120374	0.00943714	-0.885113
Gnptab	0.162943	6.25142	3.97179	0.00120477	0.00944044	-1.06168
[truncated: 13,665 more rows]

## Sheet: DEGs_up
GeneID	logFC	AveExpr	t	P.Value	adj.P.Val	B
LOC108351061	1.95175	1.61731	5.34998	0.000160559	0.00267553	0.856136
Nmu	1.94271	3.1425	7.86059	3.30957e-06	0.000440873	4.3648
Acer2	1.56684	4.20129	4.93228	0.000445989	0.0049906	0.28346
Slc19a3	1.48575	2.38739	4.64857	0.000538676	0.00565159	0.0116587
Gpatch4	1.47087	5.1838	5.40805	0.00022208	0.00322397	0.905178
Amy1a	1.46979	1.91844	7.46559	2.18201e-06	0.000356883	4.239
Apold1	1.46687	3.55785	3.01527	0.0121222	0.044964	-2.76218
Hif3a	1.44542	1.13511	5.28274	0.000117427	0.00224588	1.00037
Hmcn2	1.38689	2.52195	3.96681	0.00194693	0.0130161	-1.07975
Plin4	1.2611	2.19262	5.2113	0.000146138	0.00253781	1.06091
Rbm3	1.22226	5.78607	5.13073	0.000336516	0.00416037	0.441712
Slc17a7	1.21848	5.73174	3.16551	0.00956218	0.0382389	-2.86523
Abcg2	1.14527	3.82743	4.5359	0.000715188	0.00675089	-0.181799
Col24a1	1.12235	1.96397	7.0314	3.82973e-06	0.000451044	3.87182
Ccdc77	1.11659	3.05576	3.56784	0.00400977	0.0210215	-1.73332
LOC103692665	1.11444	0.896474	3.57544	0.00324052	0.0181349	-1.61283
Col17a1	1.08581	1.21336	4.43544	0.000532423	0.00561487	-0.150151
Nnmt	1.06853	1.31461	3.90886	0.0016212	0.0115482	-1.02829
RGD1566251	1.02279	4.50698	3.83291	0.00271814	0.0161417	-1.50138
Bdnf	1.0088	4.10907	6.3762	2.12479e-05	0.000906887	3.04683
LOC102556078	1.0015	0.743613	5.8195	3.23798e-05	0.00112661	1.85826
LOC102554677	0.992223	1.17481	6.28289	1.39777e-05	0.000777914	2.611
Col9a2	0.990564	4.56554	7.2526	5.11271e-06	0.000501507	4.4037
Fam227a	0.961733	4.4081	5.42207	0.000134743	0.00244002	1.34788
Col19a1	0.951069	4.0315	9.78568	6.03954e-08	0.000161803	8.20172
Slc25a48	0.938834	1.30257	5.28182	8.9e-05	0.0018945	1.26888
Myh8	0.915148	0.678391	3.44531	0.00381303	0.0202397	-1.76673
Zbtb16	0.915109	5.18312	3.72149	0.00336661	0.0186473	-1.80006
RGD1565071	0.913671	0.83425	3.67216	0.00237113	0.0147797	-1.38082
Mroh5	0.912804	2.22903	4.70368	0.00030295	0.0039013	0.447816
Mslnl	0.909034	1.58508	3.96604	0.00134178	0.0101584	-0.858874
Fmo2	0.904727	1.69357	4.83156	0.000213518	0.00315226	0.654504
LOC108351880	0.890999	1.94693	5.60792	4.79822e-05	0.00136441	1.91125
LOC103690800	0.880312	2.38869	6.73677	6.31716e-06	0.000546397	3.66326
Adam8	0.877928	3.4354	5.76763	4.32478e-05	0.00129119	2.30657
Gpr157	0.868835	2.76865	6.98968	4.10805e-06	0.000462939	4.14889
LOC100911237	0.868824	1.02001	4.93364	0.000174722	0.00280637	0.6864
RGD1565166	0.865472	0.602042	3.1943	0.0063241	0.0287404	-2.17104
Ndst4	0.865208	3.58427	4.87691	0.000273401	0.00366344	0.661211
RGD1560556	0.861101	1.29447	7.14694	3.15737e-06	0.000437673	3.71107
LOC108351553	0.853529	1.21148	5.0353	0.000143267	0.00251584	0.880667
Slc9b2	0.851203	1.83902	7.04552	3.74011e-06	0.000447214	3.83669
LOC108349650	0.850036	0.703332	3.5535	0.00294698	0.0169867	-1.56539
Trnk	0.846894	4.80783	7.56997	2.33884e-06	0.000362729	5.13718
Ager	0.846606	2.23545	5.76827	3.55949e-05	0.00117198	2.22647
Tmem86b	0.844241	1.79563	6.491	9.6776e-06	0.000662262	3.1118
Rtbdn	0.839191	2.82857	5.98541	2.38879e-05	0.000947292	2.7038
Pcdh20	0.837734	3.99974	4.1433	0.00127639	0.00983656	-0.767871
Myom3	0.83253	2.98053	4.78615	0.000270628	0.00364093	0.624397
LOC102547720	0.822205	1.11448	5.33839	7.98752e-05	0.00181525	1.30629
L3mbtl1	0.821438	4.07643	6.51671	1.15559e-05	0.00070985	3.58084
Serpina1	0.818782	0.407606	5.03646	0.000142945	0.0025139	0.695454
Miat	0.817357	8.25653	7.79282	2.99495e-06	0.000430393	4.96339
RGD1561413	0.814178	1.24676	5.59252	4.93868e-05	0.00138482	1.7058
Eqtn	0.81301	4.32949	7.76681	1.2434e-06	0.000309782	5.65069
Etnppl	0.812086	5.11368	4.27295	0.00115707	0.00919782	-0.769653
Sult5a1	0.811723	1.46961	3.69596	0.00222842	0.0141894	-1.28998
LOC102554754	0.811561	2.35117	6.23144	1.5322e-05	0.000816341	2.94274
LOC108348192	0.810539	2.11793	6.36103	1.21669e-05	0.000733009	3.05036
LOC102549102	0.81038	3.04778	8.11356	6.72369e-07	0.000270051	5.73238
Cpne9	0.81037	5.01198	5.81711	6.16644e-05	0.00157315	2.05564
LOC108349039	0.808575	0.783886	4.47682	0.000432445	0.00489098	-0.0558581
Crh	0.793934	1.89201	5.67941	4.1983e-05	0.00127942	2.00423
Htr2a	0.791504	1.74899	3.96015	0.00128454	0.00986325	-0.816601
Pgbd1	0.781399	1.09321	5.29629	8.65686e-05	0.00187553	1.24031
Pdzd7	0.781029	4.49316	5.95332	3.72168e-05	0.00118489	2.52151
LOC102547415	0.780941	1.18754	6.14442	1.79108e-05	0.000851231	2.43982
Snhg11	0.77145	9.09767	5.78831	8.47864e-05	0.00185747	1.68247
Plag1	0.768446	4.33523	7.86322	9.92168e-07	0.000292509	5.85631
Vwa5b2	0.767936	6.01506	8.44019	6.48099e-07	0.000267894	6.4047
Fam83d	0.767262	2.32332	4.10193	0.000979115	0.00822351	-0.549685
Acr	0.766719	0.433898	3.99094	0.00115849	0.00920211	-0.865891
Rnf207	0.766267	2.95113	6.193	1.64139e-05	0.000832255	3.05499
Rab37	0.765434	4.35333	4.53388	0.000590975	0.00599937	-0.0795423
Adcyap1	0.765418	6.78058	3.81658	0.00285218	0.0166827	-1.78122
LOC108353136	0.760315	0.860692	4.34193	0.000567416	0.0058412	-0.254121
Pbld2	0.758719	2.553	5.00671	0.000151474	0.00258462	1.07413
LOC100910676	0.757306	3.10389	4.63502	0.000353775	0.00428911	0.389481
Cabp7	0.756415	5.78045	5.48874	0.000123864	0.00230976	1.34746
LOC108351605	0.755954	2.06897	3.8421	0.00165263	0.011687	-1.01121
Vwf	0.75501	5.96619	3.03297	0.0115893	0.0435231	-3.10623
LOC102553657	0.754985	0.826381	4.21141	0.000739107	0.00689767	-0.465645
Pbld1	0.754596	3.3457	4.90306	0.000212337	0.00315104	0.861589
Mir186	0.752709	1.42229	5.01648	0.000148616	0.00255815	0.896686
Lrg1	0.75235	2.1015	3.24758	0.00588424	0.0273585	-2.08767
Rtn4rl2	0.741603	0.496463	4.14749	0.000841661	0.00747448	-0.612251
Trnd	0.739521	3.56878	5.4768	6.71736e-05	0.00164151	1.91545
P2rx5	0.739499	2.41958	4.83224	0.000213234	0.00315104	0.763644
Npas1	0.739485	1.79192	3.70169	0.00217951	0.0140038	-1.25805
LOC108349532	0.735346	2.1911	5.52989	5.55558e-05	0.00148996	1.85162
Trnl1	0.733016	6.07172	7.8759	1.5653e-06	0.000330003	5.556
Trne	0.732946	0.656024	3.70416	0.00208719	0.0136111	-1.3
LOC108349985	0.730614	1.175	4.18028	0.00078736	0.00716096	-0.471225
Ptp4a3	0.729583	5.5676	4.62006	0.000587617	0.00597665	-0.165155
Pdyn	0.72735	5.80613	2.99449	0.0123444	0.0454973	-3.15323
LOC103692550	0.724834	2.72925	5.85026	3.05959e-05	0.00108921	2.47144
Abcc9	0.723929	4.44514	5.36266	0.000107242	0.00210506	1.5151
LOC108352098	0.723565	3.02897	4.9227	0.000184136	0.0028988	0.959127
Zfp141	0.72331	4.01907	5.09302	0.00016185	0.00268006	1.12836
LOC103692627	0.720691	0.230632	3.73267	0.00196823	0.0130859	-1.2893
Mctp1	0.719992	3.63887	4.8043	0.000267814	0.00364093	0.658885
Ltk	0.719159	2.66293	4.09532	0.00099828	0.00830744	-0.553108
Syde2	0.713021	4.66741	5.48811	8.82432e-05	0.00189089	1.69558
LOC103692514	0.704479	1.10975	3.825	0.00162795	0.0115788	-1.06288
LOC108352302	0.703459	1.73744	4.20088	0.000755082	0.00697846	-0.377916
LOC681177	0.703136	2.37802	6.33878	1.26561e-05	0.000748095	3.10505
Ubap1l	0.702569	2.64866	5.00337	0.000152463	0.00258462	1.08111
LOC108352132	0.700636	0.767374	3.5122	0.00309988	0.0175958	-1.60484
Mir3072	0.700629	1.26129	3.89162	0.00141987	0.0105307	-0.939391
Col16a1	0.699552	5.74466	6.52275	1.5773e-05	0.00082056	3.3269
LOC108350352	0.699282	0.871067	5.02987	0.000144791	0.00252843	0.797944
Mir770	0.693851	5.19612	4.95786	0.000278329	0.00370412	0.573492
Neurod6	0.693501	2.73123	3.175	0.00701509	0.0306854	-2.26108
Mael	0.691021	0.391632	3.67135	0.00223306	0.0142016	-1.37662
Hpn	0.691003	0.565875	3.76869	0.00182767	0.0124907	-1.20411
Mir1249	0.690657	0.958844	4.48927	0.000421775	0.0048224	-0.00674703
Zfp711	0.687111	3.72053	6.77045	5.96239e-06	0.000536752	4.12065
LOC108349040	0.685779	2.00867	5.33616	8.02158e-05	0.00181783	1.51105
Notum	0.685599	1.51401	3.39666	0.00399543	0.0209803	-1.77718
LOC102546835	0.685439	3.03108	6.02449	2.22488e-05	0.000928911	2.81402
LOC103693092	0.683325	3.13155	4.68779	0.000295656	0.00384329	0.54313
Rbm11	0.67731	3.477	5.23636	9.94695e-05	0.00201044	1.54569
LOC103692938	0.676912	2.02251	3.28508	0.00520659	0.0251915	-1.99134
Trnr	0.674761	3.07824	5.00384	0.000152322	0.00258462	1.12965
Mroh7	0.673535	3.87311	6.84126	5.28272e-06	0.000501507	4.25796
Onecut1	0.672737	1.71315	3.87134	0.00148019	0.0108496	-0.941743
LOC501110	0.670649	4.51976	3.86222	0.00212573	0.0137764	-1.32432
Map3k15	0.665129	0.434369	4.48383	0.000426397	0.00485063	-0.105862
Gckr	0.664358	0.520678	4.32923	0.000582156	0.00594321	-0.326543
LOC689065	0.664274	2.00825	4.05874	0.00100859	0.0083458	-0.600243
LOC310926	0.664065	0.370401	4.42806	0.000476969	0.00524884	-0.201471
mt-Rnr2	0.663617	11.1232	5.0342	0.000272404	0.00365367	0.520476
Sv2b	0.663543	6.88031	5.21763	0.000197715	0.00305542	0.827666
Gnb3	0.660454	1.63634	3.0162	0.00893882	0.0364535	-2.44451
Aurkc	0.658221	3.43639	7.73305	1.21842e-06	0.000309782	5.42536
Gfra4	0.65714	2.62845	4.62198	0.000323463	0.00405663	0.425444
Xdh	0.6565	3.79723	4.13128	0.00105714	0.00863353	-0.617295
LOC102548271	0.656069	1.32259	2.99	0.00928229	0.0373965	-2.47552
Lcn12	0.655933	1.68721	6.62181	7.70407e-06	0.000609478	3.24507
Nxpe2	0.65455	1.00352	3.72722	0.00199045	0.0131666	-1.23335
Ttll9	0.65408	3.51821	3.81175	0.00196823	0.0130859	-1.1735
LOC108351758	0.653947	1.23487	4.72778	0.00026212	0.00358972	0.41396
Chad	0.653721	2.0185	3.94204	0.00128045	0.0098488	-0.802574
LOC108352819	0.651302	0.682443	3.49617	0.00320407	0.0180275	-1.6365
Serinc2	0.650973	0.782767	4.53607	0.000384016	0.00452613	0.0363416
Flt4	0.650618	1.65549	4.10491	0.000917924	0.00788287	-0.547307
Oosp1	0.649996	0.820314	4.90881	0.000183438	0.00289071	0.607908
Tmprss7	0.647839	3.04973	5.33346	8.06314e-05	0.0018199	1.69161
LOC102549910	0.646945	0.739672	3.61515	0.00250715	0.0153646	-1.4379
LOC100911253	0.646827	4.62128	6.72109	6.8017e-06	0.000560766	4.09845
Scn7a	0.646514	2.91868	3.76513	0.00198433	0.013153	-1.16198
Slc44a5	0.64243	2.33197	3.15142	0.00691843	0.0303388	-2.2419
P2ry4	0.641585	3.59002	4.60087	0.000369208	0.00441135	0.351653
LOC108351556	0.640833	3.35468	4.16242	0.000898577	0.00777212	-0.457571
Tmem132b	0.640704	4.58971	5.12228	0.000158255	0.00265124	1.12481
LOC108348988	0.6401	0.599293	4.35042	0.000557769	0.00577654	-0.281065
Ctgf	0.636426	3.67997	2.87248	0.0136801	0.0489264	-2.95827
Rsph6a	0.633608	1.39824	5.63213	4.5857e-05	0.00133514	1.80643
LOC108352166	0.633362	0.481154	4.61133	0.0003304	0.00412381	0.0944517
Pvt1	0.632852	0.892697	3.65616	0.00230405	0.0145175	-1.35909
Tmem116	0.632691	0.968606	3.63817	0.00239102	0.0148387	-1.3834
Arhgef38	0.631994	1.61689	3.01757	0.0087845	0.0360305	-2.43296
Slc28a2	0.631142	3.99203	4.07069	0.00121925	0.0095064	-0.765554
Egfem1	0.630644	2.6053	5.00419	0.000152221	0.00258462	1.07693
LOC102549402	0.630187	1.2701	4.71261	0.000270124	0.00364093	0.396499
Ano3	0.629636	4.10246	6.37893	1.17877e-05	0.000715668	3.55104
Maff	0.628639	1.36725	3.83086	0.00160847	0.011489	-1.03304
LOC102555866	0.628127	3.5653	5.11849	0.000121902	0.00228954	1.36116
Mir2985	0.627158	0.921371	3.51217	0.00310006	0.0175958	-1.59535
LOC108351541	0.626938	2.197	4.4614	0.000446044	0.0049906	0.108855
RGD1566401	0.625534	9.59655	4.94389	0.000316706	0.00400394	0.346739
LOC108348366	0.624919	1.41333	4.3609	0.000546095	0.00570337	-0.146413
Alppl2	0.621463	1.73118	3.37336	0.00412728	0.0214563	-1.80361
Kcnh5	0.620618	3.38396	5.59921	4.87711e-05	0.00137401	2.18161
Atp13a5	0.617494	3.60162	3.57471	0.00319164	0.0179769	-1.62683
LOC108350721	0.615062	3.88221	5.63863	4.5303e-05	0.00132146	2.2877
Spdya	0.613486	2.54553	5.64014	4.51747e-05	0.00132018	2.10178
LOC102556259	0.61236	2.41225	3.48645	0.00336461	0.0186473	-1.62472
Vwa7	0.610215	4.57384	4.37313	0.000709051	0.00671903	-0.303735
Invs	0.609781	4.14124	6.21978	1.5645e-05	0.00081961	3.29033
LOC108348833	0.608803	2.04245	4.79333	0.000230243	0.00328107	0.647478
LOC108351713	0.60725	0.982517	3.82728	0.00162033	0.0115472	-1.0697
Mgst2	0.607064	0.367336	4.03724	0.00105385	0.00861557	-0.801558
Lair1	0.607001	1.87586	3.72769	0.00198851	0.0131593	-1.1827
Dusp3	0.605075	8.09644	5.51836	0.000104045	0.00207224	1.42955
LOC103693635	0.604415	0.847424	3.44292	0.00357584	0.0194418	-1.71414
Nox4	0.603292	0.637237	3.75453	0.0018817	0.0127162	-1.21988
LOC100912293	0.603286	0.588607	4.72768	0.000262171	0.00358972	0.28964
LOC102550768	0.600969	0.486561	3.27449	0.00505969	0.0247285	-2.00855
Coro6	0.596603	5.66658	5.55923	7.79425e-05	0.00179543	1.75193
LOC108350023	0.591515	0.787272	3.28302	0.00497163	0.024413	-1.98106
Hfm1	0.591505	2.69895	4.12276	0.000885129	0.00771975	-0.455127
LOC102548730	0.590722	3.30403	5.53498	5.50261e-05	0.00148155	2.06409
LOC102547266	0.588196	2.27888	5.41667	6.88183e-05	0.00166869	1.69383
Arrdc2	0.587837	4.32522	2.9481	0.0121075	0.0449285	-2.95254
LOC102554922	0.587814	1.18597	3.65058	0.00233068	0.0146441	-1.34845
Pcdh11x	0.58736	4.18598	5.72818	3.83418e-05	0.00120842	2.45094
Pip5kl1	0.587079	4.39686	4.64422	0.000373263	0.00443611	0.307218
Chd1l	0.586291	3.07005	4.54383	0.000378097	0.00447909	0.314699
Per2	0.584878	4.82606	7.22478	2.77509e-06	0.000406253	4.95213
LOC103692950	0.584247	1.6185	3.96845	0.00121304	0.00947208	-0.781648
Neto1	0.58344	4.41253	6.74326	6.24715e-06	0.000545059	4.16554
LOC103694111	0.582739	2.5241	4.1573	0.000825038	0.00737636	-0.399187
LOC102555825	0.582259	0.680033	3.83974	0.00157939	0.0113484	-1.07807
Lat	0.580762	0.911868	3.23257	0.0055156	0.0261728	-2.06009
Sema3a	0.579305	3.81226	3.11029	0.00835282	0.034816	-2.5366
Kcna1	0.578962	6.84107	4.7928	0.000392357	0.00460021	0.131006
LOC102550474	0.578857	1.2712	4.20595	0.000747347	0.00693654	-0.417337
LOC108349236	0.578792	0.637686	3.15634	0.00645158	0.0290919	-2.19444
Sowahb	0.57753	2.1082	2.83956	0.0127684	0.0466372	-2.76295
Lin28b	0.576775	2.82808	3.79035	0.00176575	0.0122275	-1.0672
LOC108351472	0.576476	0.30619	3.53258	0.00297231	0.0170856	-1.60522
LOC103693859	0.573387	1.04759	3.24944	0.00532745	0.0255509	-2.02802
Abcb1a	0.573329	5.5871	5.51758	7.85809e-05	0.00180218	1.73787
LOC102549342	0.572476	2.6326	4.06189	0.00100212	0.00832121	-0.566328
Hapln2	0.572118	7.16738	4.0674	0.00159255	0.0114063	-1.25375
Kifc2	0.571352	7.37035	9.76654	6.19775e-08	0.000161803	8.64933
LOC102557338	0.571084	2.68248	6.02772	2.21185e-05	0.000928911	2.73434
LOC102547703	0.570423	3.79266	6.06492	2.06756e-05	0.000889732	3.00563
Slco4a1	0.569894	2.04578	5.04928	0.000139425	0.00249025	1.06456
LOC103691925	0.569549	0.489761	3.21899	0.00567193	0.0266322	-2.09826
Cdc25c	0.569286	1.92662	5.12915	0.000119414	0.00226727	1.17066
Hcrtr2	0.568831	2.32846	4.18388	0.000781623	0.0071356	-0.362053
Gucy1a2	0.565908	3.55904	6.17771	1.68705e-05	0.000833627	3.16069
LOC685680	0.565682	2.80519	4.09703	0.000932784	0.00796003	-0.499651
LOC103693255	0.565237	0.753086	3.98846	0.00116437	0.0092354	-0.830602
LOC103693799	0.565087	1.10949	3.47107	0.00337426	0.0186676	-1.65404
Tenm1_1	0.563112	4.09741	3.96634	0.00142519	0.0105452	-0.936787
Sytl5	0.562707	3.12079	4.60617	0.00033382	0.00414011	0.428647
LOC103691033	0.562383	3.97089	7.527	1.69417e-06	0.000333135	5.30383
Jmjd7	0.561463	2.21451	5.07836	0.000131765	0.00240837	1.14051
Pde4c	0.559621	0.456318	3.10662	0.00714495	0.0311231	-2.28128
Slc27a2	0.559069	3.81173	5.76798	3.56144e-05	0.00117198	2.50707
LOC102547499	0.557336	1.69022	3.65271	0.00232046	0.0146033	-1.31974
LOC108348837	0.557224	0.733645	3.73299	0.00196694	0.0130859	-1.24592
Eogt	0.555409	4.68967	3.87254	0.00191325	0.0128568	-1.26984
Pde10a	0.552651	4.66568	8.79283	2.43103e-07	0.000234327	7.20397
LOC102555913	0.552589	0.983744	3.43903	0.00360469	0.0195309	-1.71357
Mfsd2a	0.550293	5.09185	3.82661	0.00218849	0.0140245	-1.44163
Idua	0.549313	6.18961	7.71081	1.26223e-06	0.000309782	5.72057
Bpifb4	0.549183	1.0402	3.16824	0.00629571	0.0286925	-2.16401
Lgr5	0.549016	3.35717	6.0614	2.08078e-05	0.000890528	2.94003
Epha8	0.548368	3.65519	6.20943	1.59376e-05	0.00082056	3.22638
Pask	0.547804	2.89142	5.65707	4.37686e-05	0.00129747	2.20103
Ush1g	0.547254	2.04617	2.78672	0.0140197	0.0498084	-2.84283
Slc12a3	0.546963	2.08646	3.90029	0.00139484	0.0104082	-0.872353
Neb	0.545683	3.45514	4.89746	0.000187567	0.002941	0.962682
Csmd3	0.545675	4.8687	6.53184	9.01014e-06	0.000635743	3.82898
Wsb1	0.545616	7.54737	8.41831	4.23082e-07	0.000267894	6.784
LOC108349293	0.545512	0.84238	3.44561	0.00355611	0.0193615	-1.70989
Foxf1	0.544693	0.940163	4.30818	0.000607473	0.00611676	-0.294944
Abcc2	0.542667	2.04764	4.34631	0.000562419	0.00579969	-0.102134
Ephx4	0.540606	2.50213	3.26562	0.0052074	0.0251915	-2.01333
Pkd1l1	0.540355	0.354711	3.26432	0.0051667	0.0250714	-2.03164
Wdr54	0.539984	2.15586	4.48382	0.000426412	0.00485063	0.142882
Caln1	0.539921	5.58015	5.37374	9.67371e-05	0.00197818	1.52438
Epb41l4b	0.539657	6.02756	7.85289	1.0084e-06	0.000292509	5.94059
Ackr1	0.539132	3.86278	7.12846	3.25599e-06	0.000439671	4.69475
LOC102552467	0.538359	2.13773	2.79051	0.0139136	0.0495101	-2.84167
LOC102551251	0.537924	3.83959	4.1917	0.00081958	0.00735261	-0.409554
Aloxe3	0.536983	3.47774	5.36316	7.61903e-05	0.00176284	1.78696
Mfn1	0.535769	7.13711	6.29667	1.87868e-05	0.000865519	3.08275
LOC102546816	0.535594	1.24659	3.25908	0.0052228	0.025231	-2.00704
Rtl1	0.535549	2.29355	3.52136	0.00304188	0.0173518	-1.541
Srms	0.535348	0.396712	3.46842	0.00339273	0.0187324	-1.70095
LOC108351545	0.535227	1.26476	4.83701	0.00021124	0.00315104	0.590247
Chrm2	0.534036	4.14919	5.24566	9.53928e-05	0.0019661	1.59015
Zcchc7	0.533478	5.26395	7.56307	1.59854e-06	0.000330003	5.49136
Slc24a2	0.531248	9.16072	4.75475	0.000396596	0.00462912	0.0925875
Sacs	0.530758	8.09699	8.69187	2.81808e-07	0.000234327	7.18123
Lancl3	0.529415	1.853	5.23096	9.81243e-05	0.00199025	1.31639
Leng8	0.528964	7.98245	6.1635	2.41627e-05	0.000953362	2.82858
RGD1565367	0.528083	1.07048	3.95742	0.00124076	0.00961662	-0.847076
Kcnt1	0.527198	6.64498	6.69883	8.15207e-06	0.000611998	3.89967
Btla	0.526716	0.545027	3.20995	0.00577833	0.0270346	-2.11052
Ppip5k2	0.526248	4.50063	8.03004	7.64893e-07	0.000272621	6.12696
LOC102556249	0.526108	4.74853	7.65176	1.38674e-06	0.00032912	5.60258
Vgf	0.525733	6.73493	5.21432	0.000152214	0.00258462	1.03959
Gpcpd1	0.524917	6.59477	9.90863	5.12006e-08	0.000161803	8.82281
LOC108351788	0.524905	0.685271	3.74646	0.00191319	0.0128568	-1.22832
Egfl7	0.524799	3.61974	6.29817	1.36029e-05	0.000772926	3.36437
LOC108349943	0.524407	1.19109	3.47088	0.00337555	0.0186676	-1.65067
LOC102549893	0.52253	0.677238	3.20515	0.00583568	0.0272127	-2.11319
Zim1	0.52203	4.26053	4.29316	0.000699925	0.00667142	-0.292622
Mcm8	0.521908	2.24086	3.76369	0.00184656	0.012565	-1.10873
LOC108352424	0.520306	2.06231	3.74985	0.00189988	0.0128069	-1.13771
LOC102547322	0.519767	5.34455	3.65758	0.00307353	0.0174687	-1.80014
Ftx	0.519088	3.38677	4.6978	0.000278178	0.00370412	0.60051
Ptgfr	0.518876	3.37237	3.38873	0.00424394	0.0218459	-1.8864
Wnt9b	0.517941	0.419032	3.23378	0.00550191	0.0261395	-2.07756
Fam132a	0.516974	2.13234	3.67651	0.00220945	0.0140953	-1.26558
Gpr165	0.515984	4.88994	5.18279	0.000120148	0.0022757	1.34119
Celsr3	0.515968	6.47444	7.77466	1.14073e-06	0.000309782	5.8167
LOC102552303	0.515794	1.37028	2.98571	0.00915219	0.0370152	-2.46934
LOC102554748	0.515793	1.07523	3.84532	0.0015614	0.0112657	-1.03161
Mir377	0.51414	0.334215	2.93697	0.0101095	0.0397028	-2.55688
Dzank1	0.513715	6.8813	8.51796	3.64503e-07	0.000259526	6.93041
Snhg4	0.513319	1.84119	3.11336	0.0070468	0.0307982	-2.2567
Pappa	0.512748	2.58768	4.03645	0.00105556	0.00862505	-0.613151
Mettl7a	0.512722	6.34265	3.33711	0.00608294	0.0279997	-2.54433
Tnfrsf11a	0.512667	4.5013	4.13378	0.00100443	0.00832121	-0.65712
Scn1a	0.512335	8.08963	5.26603	0.00013853	0.00248522	1.11307
RGD1561251	0.512065	1.9357	4.92817	0.000176604	0.00281948	0.851411
Dusp10	0.511443	3.07223	4.12643	0.000878536	0.00768447	-0.445856
Wfdc2	0.510061	3.24554	4.09718	0.000932508	0.00796003	-0.504137
Clasrp	0.509304	6.02355	6.68448	7.37661e-06	0.000594245	4.0003
Tslp	0.507572	0.987246	3.21974	0.00566319	0.0266105	-2.07923
Prkab2	0.507283	4.98319	6.10589	1.91991e-05	0.000868766	3.09714
Vash2	0.506884	3.68239	6.40404	1.12763e-05	0.000703715	3.54363
Lvrn	0.506071	0.622799	3.17863	0.00616273	0.0282922	-2.15851
LOC102551533	0.50591	0.715325	3.04443	0.00811629	0.0340932	-2.37526
Nexn	0.505893	2.28763	3.283	0.00497176	0.024413	-1.96753
Zfp61	0.505766	5.2852	5.27904	0.000104772	0.00207766	1.45131
Grin2a	0.504049	5.94516	6.88369	4.91477e-06	0.000501507	4.39377
Ssh3	0.502972	5.22653	8.7524	2.57884e-07	0.000234327	7.22199
Stil	0.502234	1.35127	3.33261	0.00448881	0.0227035	-1.87989
Chrd	0.502134	2.92748	5.61323	4.75073e-05	0.00136326	2.13709
LOC108352922	0.501665	2.13678	2.96935	0.0094632	0.0379206	-2.51765
Prss55	0.501481	1.96388	3.14184	0.00664659	0.0296026	-2.2094
Fzd7	0.499613	1.69449	3.63851	0.00238935	0.0148364	-1.34409
LOC108352689	0.498657	1.24817	3.85766	0.00152233	0.0110551	-0.996689
LOC108351589	0.497713	0.485216	3.87225	0.00147742	0.0108395	-1.04661
Kcp	0.497552	2.06969	3.6055	0.00255752	0.0155145	-1.39228
LOC103691125	0.49682	1.8192	3.31996	0.00460738	0.0231018	-1.89618
Gria3	0.496739	6.47776	7.45317	1.90911e-06	0.000333135	5.31119
Htr1f	0.496552	1.09325	3.55776	0.00282195	0.0165741	-1.50939
LOC108350659	0.495933	1.43177	2.8199	0.0128267	0.0467795	-2.74991
Npepo	0.495922	4.24811	6.27747	1.41134e-05	0.000781175	3.39272
Snrpn	0.49566	1.16943	4.37721	0.000528414	0.00559309	-0.151862
Trim54	0.494776	0.763858	2.97525	0.00934984	0.0375759	-2.48766
Grp	0.494293	3.19325	3.26177	0.00536702	0.0256856	-2.08707
Cysltr2	0.493802	0.76397	3.34593	0.00436728	0.0222943	-1.87829
LOC501033	0.4936	5.08121	6.00556	2.30276e-05	0.000936389	2.91678
LOC102548949	0.493206	2.13718	3.71073	0.00205917	0.0134901	-1.2049
Lime1	0.493126	5.19214	6.1018	1.93415e-05	0.000870303	3.08149
Upk2	0.492876	0.852744	3.25154	0.00530444	0.0254951	-2.03051
Hcrtr1	0.492797	2.58023	3.27054	0.00510102	0.0248607	-2.0013
LOC100910970	0.492673	1.52694	3.13708	0.00671181	0.0297914	-2.21248
LOC108352198	0.492089	1.6157	3.50191	0.00316636	0.0178731	-1.5828
Pla2g4b	0.490506	3.59036	4.8513	0.000205379	0.00311429	0.880852
Trnm	0.490337	7.66766	6.03122	2.80614e-05	0.00104755	2.66815
Col2a1	0.490239	3.05143	4.1905	0.000771177	0.00707243	-0.327936
Nos3	0.489823	3.31272	3.33785	0.00459765	0.0230752	-1.95916
Sfxn4	0.489661	4.53911	6.57661	8.33354e-06	0.000615738	3.90001
Fut9	0.488182	4.01041	7.15079	3.13721e-06	0.000437673	4.75717
Adgrl4	0.487572	4.01502	4.9574	0.000166785	0.00273534	1.06657
Trim58	0.48584	0.462289	3.32298	0.00457876	0.0229989	-1.93122
Slitrk4	0.485823	3.84353	6.14803	1.77948e-05	0.000851231	3.14902
Zmynd12	0.484399	2.01715	2.92056	0.0104535	0.0406311	-2.59751
Scn8a	0.484092	7.90501	5.62267	6.18989e-05	0.00157618	1.88804
Epha6	0.483765	4.74828	5.00549	0.000161248	0.00267641	1.05937
LOC102556623	0.482779	0.707817	2.89227	0.0110734	0.0421617	-2.62345
C8g	0.482424	2.43407	3.5522	0.00285451	0.0166827	-1.48692
Rbm44	0.481428	0.793382	3.19878	0.00591269	0.0274337	-2.11966
Fgf14	0.480718	5.07517	6.98038	4.17296e-06	0.000463583	4.56805
LOC102548387	0.47893	1.11002	3.58437	0.00267132	0.0159843	-1.46384
Zfp958	0.4785	4.58306	6.06199	2.07855e-05	0.000890528	3.03084
Dennd1c	0.478435	2.31329	4.95364	0.000168017	0.00273862	0.951553
Amer1	0.478398	3.22205	4.71362	0.000269584	0.00364093	0.625445
LOC103692951	0.477832	2.46028	3.5564	0.0028299	0.0166083	-1.4797
LOC102548359	0.477281	2.61894	5.45603	6.38708e-05	0.0016059	1.82395
Macrod2	0.477229	4.70187	5.58907	4.97079e-05	0.0013904	2.18995
LOC108349455	0.475988	1.10391	2.95112	0.00982183	0.0389393	-2.52581
Slc7a14	0.475412	5.7949	5.00904	0.00018586	0.00292007	0.859162
Birc7	0.475312	1.25105	3.16543	0.00633215	0.0287415	-2.16541
Scn4b	0.474178	8.48498	4.68762	0.000412076	0.00476015	0.0310771
Uvssa	0.473982	2.89317	5.80628	3.31796e-05	0.00113975	2.44103
Tacr1	0.473967	2.94566	3.56058	0.00280561	0.0165178	-1.48899
Nptx1	0.473914	6.55007	4.95288	0.000225143	0.00325141	0.639192
LOC102552805	0.473208	2.21125	3.22916	0.00555448	0.0262936	-2.06135
Fnip1	0.472941	5.89584	7.74327	1.19884e-06	0.000309782	5.77285
LOC108350383	0.472905	0.537835	2.79731	0.0134275	0.0482736	-2.77737
Cldn5	0.470823	5.65729	4.68331	0.000353086	0.0042874	0.241613
Penk	0.470329	8.23276	4.5986	0.000489619	0.00532967	-0.139684
Trappc3l	0.470205	1.63171	3.82426	0.00163041	0.0115822	-1.02689
Degs2	0.468998	1.97582	3.49039	0.00324247	0.0181393	-1.59648
Fam228b	0.468651	1.68818	3.70797	0.00207087	0.0135327	-1.22419
LOC102552880	0.468367	4.65053	4.32894	0.000643485	0.00633454	-0.259205
Igsf9b	0.468239	4.77606	8.04971	7.41966e-07	0.000272621	6.19093
LOC102553451	0.46806	0.993664	2.96009	0.00964381	0.0384183	-2.51094
Ppef2	0.467882	1.46027	3.78479	0.00176818	0.0122336	-1.10452
Sycp2	0.466303	1.68635	3.2065	0.00581949	0.0271931	-2.09334
LOC102554070	0.465867	3.36379	3.84196	0.0015722	0.0113189	-0.989278
Prpf39	0.465843	5.79211	7.78168	1.12814e-06	0.000309782	5.83203
Cldn15	0.465095	1.82804	3.20502	0.00583726	0.0272127	-2.09684
Trim72	0.464539	0.287708	3.23896	0.00544356	0.0259284	-2.07575
Slc6a5	0.463895	7.86685	4.28344	0.000909249	0.00784278	-0.748211
Eml5	0.463862	5.40959	6.58335	8.23645e-06	0.000613785	3.90475
LOC102553183	0.463116	2.49219	3.9425	0.00127924	0.0098488	-0.784019
LOC102552227	0.462944	2.20996	3.3457	0.00436942	0.0222943	-1.85384
Nostrin	0.462866	2.34899	3.10399	0.00718354	0.0312088	-2.28951
Fam131b	0.462086	6.81042	5.02819	0.000191244	0.00297912	0.786795
Prkg2	0.461755	3.23242	4.18968	0.000772463	0.00707595	-0.331963
Ngf	0.4617	0.448074	2.98677	0.00913234	0.0369731	-2.47456
Ccdc62	0.461095	3.64993	5.31422	8.36501e-05	0.00184549	1.71133
mt-Rnr1	0.460934	10.6951	4.67518	0.000394817	0.0046176	0.0836783
Bora	0.460538	2.04684	3.67544	0.00221433	0.0141112	-1.26923
Taf1d	0.460456	4.04067	4.84136	0.000209438	0.00313637	0.850144
LOC102556650	0.458875	0.829591	3.36769	0.00417576	0.0215872	-1.83925
LOC102547667	0.458603	3.87997	4.47914	0.000430437	0.00488224	0.18014
LOC102547897	0.458483	2.87236	4.71499	0.000268853	0.00364093	0.608544
LOC108351917	0.458433	2.52037	4.084	0.000957917	0.00809757	-0.530018
LOC102548361	0.458292	1.16417	3.28073	0.0049951	0.0244893	-1.9723
Fam135b	0.457369	4.84504	6.0703	2.04751e-05	0.000888409	3.03943
Slc35f3	0.457181	3.99269	4.37397	0.000531875	0.00561487	-0.0281525
Oprl1	0.455479	5.67477	5.87196	3.00049e-05	0.00108045	2.62926
Elavl2	0.455087	6.74166	5.7988	3.91705e-05	0.00121981	2.33725
LOC501297	0.454861	2.00009	3.25107	0.00530959	0.0255121	-2.01817
LOC103693018	0.453678	0.548386	2.89567	0.0109969	0.0419679	-2.61939
LOC102546629	0.453406	1.53646	3.39327	0.0039613	0.0208497	-1.772
Zkscan2	0.45299	3.0175	4.06714	0.000991437	0.00828374	-0.554362
Zc3h12b	0.452206	3.27342	6.25191	1.47718e-05	0.000800642	3.227
Accs	0.451695	2.50333	4.03273	0.00106361	0.00866066	-0.622171
Syt10	0.451222	2.60338	2.94529	0.00993952	0.0392667	-2.58939
RGD1560289	0.450928	5.155	5.86415	2.98236e-05	0.0010764	2.66134
Brca2	0.450636	3.18794	4.4096	0.000495026	0.00536615	0.0734862
Adgrl2	0.449857	6.40272	5.17321	0.000134076	0.00243639	1.14042
Rsrp1	0.448578	7.70027	6.16238	1.93907e-05	0.000870303	3.01478
Slc30a3	0.447783	5.0538	5.00174	0.000160453	0.00267553	1.03542
Heph	0.447592	4.22866	3.47791	0.00363459	0.0196299	-1.85433
LOC108348906	0.447503	1.33634	3.16758	0.00630431	0.0287192	-2.16095
Cdh9	0.446777	2.4518	2.84855	0.0121026	0.0449285	-2.74928
Rasgrf2	0.446706	3.81979	4.10998	0.000908485	0.0078405	-0.517376
Thoc1	0.445224	5.10533	6.51275	9.31599e-06	0.000651454	3.79323
Bicd1	0.445207	5.62567	7.58371	1.54639e-06	0.000330003	5.52649
Nos1ap	0.444761	4.68031	8.61815	3.14151e-07	0.000234327	6.97393
Rbm41	0.444263	2.63578	4.48986	0.000421275	0.0048202	0.195392
LOC100912002	0.443697	3.3033	4.06082	0.00100431	0.00832121	-0.574426
LOC102554909	0.443599	2.36081	4.29604	0.000622579	0.00621152	-0.163629
Tdrd1	0.442891	0.490001	3.37246	0.00413488	0.0214613	-1.84952
LOC108350374	0.442643	1.29537	3.54409	0.00290263	0.0168458	-1.52214
Cstf2	0.442605	6.82594	8.68564	2.84401e-07	0.000234327	7.17214
LOC108349710	0.442305	2.10945	4.30572	0.000610502	0.00613121	-0.166193
Sh2d5	0.442002	4.53805	5.57956	5.0602e-05	0.00140567	2.18013
Cd274	0.441908	3.66965	4.08333	0.000959221	0.00809986	-0.555193
LOC102547246	0.441715	1.52733	2.81702	0.0129019	0.0469442	-2.75745
Glmn	0.441695	4.75972	7.31077	2.40858e-06	0.000366291	5.08383
LOC680627	0.441589	2.05331	3.12726	0.00684859	0.0301423	-2.23719
Napb	0.440777	8.72518	6.75633	6.1085e-06	0.000540585	4.14682
Synj2	0.440742	5.37947	3.28613	0.00604679	0.0278907	-2.47448
Tincr	0.440073	4.01285	3.72808	0.00206564	0.0135212	-1.30376
LOC501038	0.439191	4.16851	4.13758	0.00086927	0.0076367	-0.509522
Rdh16	0.438835	2.61383	2.80918	0.0131087	0.0474433	-2.83269
Cdh12	0.43871	3.96462	4.21485	0.000733951	0.00687185	-0.330125
Hecw2	0.438514	6.1126	4.22237	0.000925739	0.00792392	-0.730655
Pnisr	0.438283	7.66826	7.28712	2.50404e-06	0.000373555	5.03216
Clvs2	0.438259	3.48887	5.03361	0.00014374	0.00251828	1.20778
Trmt13	0.437844	3.75479	4.74405	0.000253808	0.00351516	0.681522
Oprk1	0.437482	3.66551	3.69733	0.00211674	0.0137318	-1.29274
Gria2	0.437182	7.745	8.30412	5.02616e-07	0.000267894	6.6149
LOC103693764	0.436974	1.2921	3.19112	0.00600653	0.0277942	-2.12143
Grk4	0.436615	3.15922	5.78283	3.46489e-05	0.00115791	2.45514
Vof16	0.436574	4.24959	3.64456	0.00252899	0.0154449	-1.52049
Fanca	0.436287	2.57931	3.63036	0.00242978	0.0149843	-1.34755
Fam126b	0.436281	5.9375	8.73464	2.64673e-07	0.000234327	7.23296
LOC108351498	0.436042	0.849283	2.91478	0.0105773	0.0409094	-2.58602
LOC365085	0.436032	3.45929	5.48073	6.09548e-05	0.00156958	1.98879
Cntnap5c	0.435648	3.94079	4.09375	0.000939046	0.00798112	-0.560427
Fancm	0.435359	5.38484	6.50282	9.47916e-06	0.000655704	3.76851
Irf6	0.43427	2.44042	3.64172	0.00237358	0.0147807	-1.32554
LOC102552534	0.433086	0.58809	3.00385	0.00881902	0.036112	-2.4439
LOC103692937	0.432511	1.342	2.92202	0.0104224	0.0405604	-2.57647
Tspoap1	0.432056	7.20589	5.91201	3.02982e-05	0.00108134	2.57466
Tfap4	0.431879	3.40985	3.57673	0.00271373	0.0161259	-1.49546
Kcnj8	0.431457	2.23184	4.04298	0.00104156	0.00854615	-0.614997
Slc7a1	0.43104	6.23616	5.23597	0.000111501	0.00217233	1.31976
Cep95	0.430932	4.37799	5.81293	3.27746e-05	0.00113329	2.59904
Prss53	0.430553	3.03777	2.81418	0.013225	0.0477101	-2.88236
Cacna1d	0.430358	6.38101	7.67085	1.34513e-06	0.000324155	5.65605
LOC102546327	0.430192	0.780201	3.20624	0.00582265	0.0271931	-2.10776
Ppil6	0.429816	2.96034	3.27726	0.00503093	0.024611	-2.01496
Rbm39	0.429555	1.34218	3.42761	0.00369059	0.0198249	-1.71827
Donson	0.429262	4.03797	5.76216	3.60001e-05	0.00117296	2.50787
Zfp483	0.427943	5.95585	7.28841	2.49872e-06	0.000373555	5.05607
LOC108353239	0.42771	4.90869	4.25709	0.000733238	0.00686928	-0.419137
Tceanc	0.427563	0.863929	2.81235	0.0130246	0.0472702	-2.75349
Tbc1d24	0.427187	5.59061	7.46941	1.85949e-06	0.000333135	5.34796
Usp45	0.426591	5.72795	7.98653	8.18322e-07	0.000278657	6.14238
Notch4	0.426192	4.11594	3.87846	0.00148936	0.0108762	-1.01257
Adarb1	0.426085	8.38779	3.72582	0.00266908	0.0159818	-1.8127
Cep97	0.42586	4.57414	7.03599	3.80038e-06	0.000450978	4.6433
Vamp1	0.425519	10.0294	5.11189	0.000149035	0.00256256	1.01206
Slc6a15	0.425332	5.91828	4.95314	0.00019133	0.00297912	0.805893
Rasgrp1	0.425087	5.82875	2.96315	0.0116387	0.0436353	-3.14855
LOC108348820	0.424691	3.14183	3.34046	0.00441682	0.0224613	-1.91399
Gas5	0.42419	4.99543	6.01798	2.25136e-05	0.000933065	2.94209
Zdhhc21	0.424179	4.85143	5.89551	2.8155e-05	0.00104755	2.7316
LOC102549498	0.423773	1.00943	3.30919	0.00471072	0.0234833	-1.92915
Cc2d2a	0.423739	5.32878	5.57945	5.06127e-05	0.00140567	2.1339
Slc4a8	0.423031	6.75101	6.77072	5.9596e-06	0.000536752	4.18232
Zfp605	0.422341	2.51442	4.07529	0.000975089	0.00820731	-0.54578
LOC102552369	0.422269	3.66348	5.2739	9.03606e-05	0.00190893	1.64075
Carf	0.422229	4.61338	6.3968	1.14215e-05	0.000707211	3.60207
Carns1	0.421972	5.79601	3.99069	0.00141934	0.0105307	-1.13008
LOC100912823	0.421701	2.78965	4.56837	0.000359984	0.00434087	0.344515
LOC103692551	0.421484	0.301451	2.92258	0.0104105	0.0405344	-2.58048
Dnm3	0.421337	8.01705	7.12958	3.24993e-06	0.000439671	4.7728
Olr287	0.42127	0.494632	2.85764	0.0118812	0.0443005	-2.68107
Anks6	0.420595	4.46095	3.71728	0.00217881	0.0140038	-1.40986
Mrs2	0.42034	5.3122	5.56829	5.1685e-05	0.00142284	2.11445
LOC103693399	0.420006	0.939892	3.29223	0.0048782	0.02412	-1.95986
Agbl3	0.419842	4.51304	4.64637	0.000308121	0.00393992	0.444603
LOC102550560	0.419638	1.15109	2.92012	0.0104628	0.0406475	-2.57767
LOC102549184	0.419396	0.212845	3.51337	0.00309242	0.0175697	-1.64315
Crebrf	0.417515	6.90396	8.02929	7.6579e-07	0.000272621	6.2041
LOC102556093	0.417153	4.61019	5.28868	8.78378e-05	0.00188996	1.64607
Thumpd3-as1	0.416876	2.89623	3.53926	0.00293166	0.016939	-1.5258
Nfrkb	0.41655	5.58204	5.48014	6.10235e-05	0.00156958	1.93303
Clk1	0.416197	6.85455	5.11266	0.000145128	0.00253149	1.03669
Adam11	0.415859	7.42643	6.1038	1.98073e-05	0.000880694	2.983
Prelid3a	0.415323	5.10581	6.25778	1.46178e-05	0.000796121	3.35668
Grm8	0.415183	4.60783	3.60868	0.00277621	0.0163914	-1.65751
Tet3	0.414957	5.56492	6.54324	8.83269e-06	0.000631759	3.8313
Ptpn11	0.414122	9.04657	5.72298	4.26811e-05	0.00128152	2.2283
Orc4	0.413608	6.14595	6.54708	8.7736e-06	0.000631759	3.81657
LOC103694424	0.413569	2.21815	3.04625	0.00808611	0.034012	-2.38592
Kctd9	0.413404	5.69845	4.8681	0.000216158	0.00317031	0.694191
Esam	0.412072	3.73323	3.79331	0.00173748	0.0121067	-1.11632
LOC103693260	0.411983	1.63743	2.80316	0.0132694	0.0478369	-2.78448
Flt3	0.411537	4.88241	4.85176	0.000205193	0.00311429	0.802642
Tbc1d4	0.411099	5.3599	5.98666	2.38335e-05	0.000947292	2.86923
LOC500124	0.410915	1.86543	3.42711	0.00369438	0.0198385	-1.70854
Kcna2	0.410648	9.12631	5.16722	0.000130668	0.00239643	1.12814
Haus7	0.410618	3.79897	5.7511	3.67458e-05	0.00117466	2.47811
Ksr2	0.409341	5.45317	6.70364	6.68788e-06	0.000560208	4.10627
Oprd1	0.409216	1.49052	2.97348	0.00938361	0.0376884	-2.49159
LOC102548260	0.40902	3.87679	4.29779	0.000620381	0.00619353	-0.163948
Luc7l3	0.407999	7.2231	7.04658	3.73343e-06	0.000447214	4.6393
Lyst	0.407525	6.20186	7.56004	1.60636e-06	0.000330003	5.48443
Zfp709l1	0.40688	1.82583	3.44993	0.00352455	0.0192364	-1.669
Mppe1	0.405979	4.54856	4.67703	0.000289892	0.00379989	0.499776
Kdm7a	0.405893	5.43232	6.22311	1.55518e-05	0.000819235	3.2833
Ankrd35	0.405562	3.64388	4.08929	0.000947639	0.00802802	-0.541985
Mtus2	0.405162	5.14012	4.6544	0.00031325	0.00397308	0.371406
Pcgf6	0.405111	3.60833	5.22855	9.85798e-05	0.00199503	1.55858
Flt1	0.404866	6.60896	3.76595	0.00233871	0.0146712	-1.66659
Rictor	0.404716	6.70656	8.1879	5.99894e-07	0.000267894	6.44414
Cyp4x1	0.404424	4.09501	5.23871	9.66748e-05	0.00197818	1.57873
LOC100911299	0.404214	4.15108	3.68151	0.0022362	0.0142094	-1.40209
Camkk1	0.404201	7.03086	6.19729	1.62882e-05	0.000832255	3.17873
Flvcr1	0.404143	2.29952	3.6108	0.00252973	0.0154449	-1.38089
Rbm20	0.404031	2.13891	2.8657	0.0116881	0.0437788	-2.69884
Fastkd1	0.403308	4.6184	4.14112	0.000874308	0.00767236	-0.567054
Sv2c	0.403102	8.58911	4.59858	0.000417599	0.00479214	-0.0168599
Hdac10	0.40301	4.04869	4.7432	0.000254234	0.00351795	0.66602
Chpf2	0.40234	5.86425	6.79961	5.67199e-06	0.000522624	4.25525
Clcn5	0.401947	4.14358	3.93452	0.00130034	0.00993785	-0.892331
Rnpc3	0.401815	5.09698	6.42433	1.08802e-05	0.000695625	3.64311
Clip4	0.401292	4.94224	7.46985	1.85815e-06	0.000333135	5.33853
Snph	0.401163	7.80033	7.60203	1.50159e-06	0.000330003	5.53739
Unc80	0.40105	8.54579	8.35045	4.68601e-07	0.000267894	6.68342
LOC102555453	0.400345	3.35586	3.88931	0.00142662	0.0105458	-0.899629
LOC102550291	0.400146	3.46904	4.96259	0.000165101	0.00271368	1.08021
Fam76b	0.399755	4.36229	6.11384	1.89258e-05	0.000866403	3.11982
Lrrc7	0.399686	3.63593	4.68936	0.000282878	0.00373925	0.583625
Ryr2	0.399317	7.7717	6.1628	1.73285e-05	0.000845588	3.10934
Gdap1	0.399208	6.77809	7.45642	1.89907e-06	0.000333135	5.31206
Dgki	0.399043	6.63096	7.99416	8.08682e-07	0.000278657	6.15227
Ptchd4	0.398952	2.49914	4.60544	0.000334307	0.00414287	0.385109
Gas2	0.398946	3.55968	5.36548	7.58544e-05	0.00176027	1.79691
LOC100911177	0.398735	4.75044	4.44279	0.000463044	0.00512951	0.0260096
LOC102552888	0.398126	2.78902	3.29131	0.00488749	0.0241355	-1.97603
Adamts2	0.398086	5.27735	4.65442	0.000315442	0.00399118	0.352357
Cracr2a	0.398046	2.21348	4.03938	0.00104926	0.00859155	-0.622272
Erc2	0.397529	4.60146	4.51606	0.000399711	0.00465853	0.184486
Hp	0.397519	0.377058	2.94249	0.00999638	0.0394321	-2.5471
Slc35f4	0.397303	2.48071	3.87578	0.00146678	0.0107797	-0.904011
Slc7a5	0.397118	6.22883	5.33364	8.41464e-05	0.00185122	1.58164
RGD1564053	0.396929	4.96176	4.62017	0.000324628	0.00406798	0.348218
Stc1	0.39692	2.51688	3.36146	0.0042297	0.0218013	-1.83375
LOC102547700	0.396858	1.19959	3.05015	0.0080218	0.033796	-2.36013
Mtfr2	0.396777	2.24776	3.02342	0.00847291	0.0351474	-2.42761
Fam110d	0.396618	1.74319	2.84373	0.0122214	0.0452065	-2.71927
C1qtnf1	0.396183	2.85241	2.99644	0.00895361	0.0364896	-2.52005
Aspdh	0.395957	2.11353	3.6243	0.00246032	0.0151428	-1.35838
Vwc2l	0.395927	4.89834	4.86604	0.000199511	0.00307289	0.828344
Fam163a	0.395626	4.88891	5.2868	8.81548e-05	0.00189089	1.6232
Atr	0.39421	4.36168	3.9874	0.00116689	0.00925011	-0.817116
LOC102551718	0.393362	1.59137	2.86061	0.0118096	0.0440862	-2.68562
Vegfa	0.393352	7.19322	4.926	0.000204972	0.00311421	0.682667
Endou	0.393082	1.81988	3.27868	0.00501625	0.0245776	-1.96827
Ago4	0.392918	3.50822	4.45491	0.000451897	0.00504168	0.152902
Iffo1	0.392834	6.0727	5.21612	0.000104972	0.00207766	1.3711
Zc3h6	0.392065	4.48503	5.48815	6.01067e-05	0.00155622	2.0172
Tll1	0.39206	3.43087	3.80331	0.00170214	0.0119241	-1.06786
Pnma3	0.391308	5.80163	3.76336	0.00217969	0.0140038	-1.5565
Dmxl1	0.391262	6.83737	8.94313	1.95525e-07	0.000234327	7.53628
Gls	0.389632	8.29977	4.7503	0.000296772	0.00384838	0.311616
Fcho1	0.389603	5.97658	4.26418	0.000762682	0.00701095	-0.556068
LOC108352384	0.389571	2.7915	3.2628	0.00518295	0.0251038	-2.02848
RGD1306072	0.389209	3.25363	3.34797	0.00434896	0.0222185	-1.91136
Slc38a2	0.389091	8.14525	4.11141	0.00113706	0.00907553	-0.998664
Zufsp	0.388556	4.57437	6.42113	1.09416e-05	0.000696706	3.64256
Gabrb2	0.387995	6.75507	4.47945	0.000507999	0.0054727	-0.19819
Dgkh	0.387394	4.63425	3.22171	0.00612064	0.0281237	-2.41384
Atpaf1	0.387241	6.10649	5.53673	5.48444e-05	0.00148155	2.00519
Scg2	0.386942	9.79668	5.50548	6.08384e-05	0.00156958	1.87303
Lingo4	0.38677	3.4251	3.54596	0.00289144	0.0168	-1.5556
Tmem145	0.386308	6.29133	5.73609	3.77826e-05	0.00119561	2.36518
RGD1565059	0.385997	2.49486	3.63912	0.00238635	0.0148364	-1.3306
LOC102554055	0.385904	2.78216	3.76486	0.00184214	0.0125458	-1.10593
Atmin	0.385625	5.92268	6.95731	4.33856e-06	0.000475239	4.51638
LOC102549269	0.385425	0.734676	3.11825	0.00697646	0.0305249	-2.2538
LOC108351028	0.38515	0.417007	3.06337	0.00780747	0.0331157	-2.35217
Fnbp4	0.384977	5.78312	6.09807	1.94722e-05	0.000871463	3.04579
Col25a1	0.384951	4.03625	3.50398	0.00317882	0.0179176	-1.72124
LOC108349244	0.38479	3.04638	3.74087	0.0019353	0.0129736	-1.15961
Akap5	0.384515	2.79183	3.20349	0.00585566	0.0272742	-2.1371
Grid2ip	0.384189	2.48278	3.11129	0.00707672	0.030886	-2.28337
Lgi2	0.384089	6.38288	3.78601	0.00214153	0.013833	-1.58052
B3galt5	0.383777	6.0451	3.90341	0.00162663	0.0115788	-1.29642
Cpeb1	0.383647	5.59299	6.14495	1.78939e-05	0.000851231	3.13832
LOC100911510	0.383176	1.13113	2.89412	0.0110317	0.0420339	-2.6208
Rap1gap2	0.382483	7.44435	6.11087	1.90272e-05	0.000866403	3.0186
Strbp	0.381866	7.9348	7.88066	9.65388e-07	0.000292509	5.97292
Morn2	0.381836	2.07262	3.06995	0.00770287	0.0328142	-2.33854
Prkch	0.381823	2.7482	3.52195	0.00303818	0.017337	-1.55053
LOC102552920	0.381483	4.20785	3.39728	0.00405209	0.0211997	-1.97015
RGD1305110	0.381477	6.54738	6.01353	2.26963e-05	0.000936389	2.86083
Cd46	0.380887	2.06505	3.65277	0.00232018	0.0146033	-1.30883
Mcf2l	0.380616	7.40776	6.84197	5.27631e-06	0.000501507	4.29469
Akap8	0.38041	6.26024	4.44536	0.000522438	0.00555512	-0.208794
Cep162	0.379974	3.91174	3.68834	0.0021563	0.0139169	-1.3407
Txnrd3	0.379758	4.30507	3.92016	0.00133917	0.0101435	-0.941464
Rps6kb2	0.378702	4.42343	5.7631	3.59376e-05	0.00117296	2.51062
Slc9a7	0.378113	6.00797	6.24416	1.49776e-05	0.000806215	3.29406
Medag	0.37784	2.54655	3.01375	0.0086422	0.0356053	-2.46245
Tvp23a	0.377831	4.77645	4.68319	0.000286368	0.00376947	0.48891
LOC108351885	0.377584	4.84492	4.45296	0.000453675	0.00505072	0.0350781
Nfxl1	0.377479	4.63081	5.2937	8.69985e-05	0.00187965	1.65379
Srek1	0.377271	6.91371	6.14037	1.80419e-05	0.000851231	3.07913
Cspp1	0.376604	5.51687	4.10582	0.00100425	0.00832121	-0.792547
Plcxd3	0.376464	4.93298	4.2973	0.000624268	0.00622044	-0.283869
Cdkl5	0.376414	4.04602	6.21365	1.58175e-05	0.00082056	3.27543
Kcnt2	0.376285	2.91368	2.87178	0.0115446	0.0433985	-2.7525
Ttc39b	0.375795	5.29338	4.83943	0.000210234	0.00314227	0.740346
LOC102550499	0.375745	0.219642	3.10425	0.0071797	0.031205	-2.29389
Mapk9	0.375153	7.74173	8.15237	6.33444e-07	0.000267894	6.38779
Bend6	0.374219	8.24335	6.39109	1.15372e-05	0.00070985	3.51327
Arid4b	0.374177	2.63992	3.7351	0.00195844	0.0130708	-1.15798
Piga	0.373669	4.71773	3.54717	0.00305787	0.017424	-1.7749
Kank3	0.372964	3.07509	3.57478	0.0027247	0.0161665	-1.47094
Arrdc3	0.372561	6.17319	4.19556	0.000868182	0.00763487	-0.701125
Mir22	0.37235	2.04854	2.93504	0.0101495	0.0398249	-2.57372
Adgrf5	0.372213	5.96294	4.46116	0.000485064	0.0052948	-0.12324
LOC103694143	0.37213	0.970436	2.98856	0.00909898	0.0368762	-2.46388
Erich3	0.371834	6.3377	5.79207	3.40616e-05	0.00115791	2.46584
Sat1	0.371394	6.03661	4.9984	0.000157047	0.00263382	0.971164
Catsperd	0.37101	2.42694	3.53986	0.00292807	0.0169307	-1.50907
LOC108348384	0.370958	1.72751	3.07214	0.00766833	0.0327383	-2.32626
Adcy9	0.3709	6.0482	6.10724	1.91524e-05	0.000868766	3.04934
Adora1	0.370628	6.89958	5.32764	8.35825e-05	0.00184549	1.55754
LOC102549694	0.370498	1.87142	2.80802	0.0131393	0.0475212	-2.78551
Zbtb40	0.370211	5.29861	4.6876	0.000283872	0.00374563	0.445462
Kcne4	0.369294	2.1408	3.07319	0.00765193	0.0327307	-2.33523
Rbm33	0.369196	6.72703	5.98798	2.37763e-05	0.000947292	2.80903
Dhrs1	0.368749	4.73286	4.15775	0.000824277	0.00737636	-0.530458
Mtf2	0.368008	4.66581	4.95422	0.000167825	0.00273835	1.01661
LOC302022	0.367696	4.20427	5.51638	5.6988e-05	0.00150787	2.07635
Paxbp1	0.367543	5.64218	5.87855	2.9045e-05	0.00106311	2.65964
LOC108351782	0.36683	0.467309	2.82406	0.0127192	0.0464954	-2.73502
Atp8a2	0.366745	8.14048	4.82276	0.000241974	0.00339936	0.501353
Snrnp70	0.366573	8.05666	4.72689	0.000296207	0.00384726	0.303587
LOC100911221	0.366439	4.65336	3.84727	0.00158304	0.0113538	-1.14518
Cirbp	0.36617	5.95406	4.86398	0.000204498	0.00311421	0.716104
Tdrd5	0.365906	0.912522	2.86119	0.0117957	0.0440607	-2.67387
Adamts6	0.364969	2.86017	3.29604	0.00484006	0.0239542	-1.97248
Dtwd1	0.364897	2.96305	3.60319	0.00256973	0.0155595	-1.41115
Slc8a3	0.364896	5.78717	5.79099	3.41299e-05	0.00115791	2.49237
Pggt1b	0.364419	5.33135	6.1857	1.66302e-05	0.000832255	3.2221
LOC108352586	0.364311	0.607403	2.88145	0.0113198	0.0427776	-2.64171
Cep295	0.36429	3.63816	4.5365	0.000383681	0.00452558	0.300214
Atad5	0.364133	2.81516	3.74566	0.00191635	0.0128721	-1.14198
Hectd2	0.363954	4.53447	4.7997	0.000227365	0.00326564	0.734944
Bmper	0.363045	3.14558	2.98433	0.00917792	0.0370714	-2.57554
Abca7	0.363019	6.28718	3.88203	0.00167003	0.0117729	-1.34584
Kdm4c	0.363019	4.26526	5.40262	7.068e-05	0.00169021	1.87064
Rrh	0.362885	0.421891	2.82553	0.0126813	0.0464113	-2.73306
Lcor_1	0.362717	3.92929	4.76079	0.000245537	0.00343094	0.705382
Grasp	0.362367	2.24834	3.09143	0.00737098	0.0318003	-2.30721
Slc25a36	0.362179	6.92651	8.28638	5.1632e-07	0.000267894	6.59014
LOC108350216	0.362098	1.7309	3.16179	0.00637976	0.0288906	-2.17112
Uhrf1	0.362015	2.29143	3.35565	0.00428069	0.0219773	-1.83764
Fras1	0.362011	4.50246	2.96422	0.0101863	0.0399095	-2.87591
Tmem229b	0.361798	6.73476	3.52527	0.00362836	0.0196184	-2.11377
Lmbrd2	0.36154	5.17543	5.69109	4.10791e-05	0.00126417	2.34747
LOC108351595	0.361106	2.25411	3.55972	0.00281059	0.0165197	-1.47226
Tial1	0.360757	6.25981	8.779	2.48056e-07	0.000234327	7.30142
LOC102555329	0.360707	1.71344	2.93845	0.010079	0.0396478	-2.55622
Plekhg3	0.360618	6.80875	3.58192	0.00321639	0.0180589	-2.00156
Abcc5	0.360584	7.68457	7.00357	4.01311e-06	0.000457525	4.56457
Atp8b3	0.360559	3.20526	2.95775	0.00968998	0.0385532	-2.63224
Carmil3	0.36024	5.94745	5.49993	5.87839e-05	0.00153978	1.94573
Mapk8	0.360171	6.59404	7.57557	1.56674e-06	0.000330003	5.5036
Cdc25b	0.360076	5.12251	5.65007	4.43448e-05	0.00130426	2.27604
Cxcl12	0.35987	5.98506	4.0289	0.0011915	0.00938344	-1.00155
Phf20l1	0.359679	5.41563	5.49533	5.92974e-05	0.00154657	1.97235
Rnasel	0.359231	4.97649	5.33872	7.98247e-05	0.00181525	1.71308
Ppargc1b	0.359137	3.39431	4.48453	0.000425806	0.00485063	0.21012
Kif24	0.358908	2.86775	2.94361	0.00997356	0.0393813	-2.61755
Abca5	0.358885	6.5625	8.26043	5.37076e-07	0.000267894	6.55264
Gfod1	0.358829	6.54681	5.32065	8.26275e-05	0.00184377	1.57633
Ankrd12	0.358751	6.15282	7.51084	1.73895e-06	0.000333135	5.40743
Clk4	0.358318	5.73746	4.87086	0.000197629	0.00305542	0.762478
Gabrg2	0.357778	7.24327	4.23769	0.000808679	0.0072812	-0.675382
Ccdc82	0.35769	5.2629	5.76066	3.61003e-05	0.00117296	2.4684
Glt1d1	0.357149	5.15002	3.62416	0.00264229	0.0159127	-1.69239
Map3k9	0.356784	6.40864	5.56071	5.24259e-05	0.00143066	2.03448
LOC500475	0.356329	2.90086	2.9	0.0109005	0.0417062	-2.70012
Tmem204	0.356312	2.92894	2.8175	0.0128895	0.0469101	-2.85221
Pkd1	0.356188	7.74076	7.54076	1.657e-06	0.000332759	5.44024
Ints6l	0.35577	4.63364	4.63984	0.000312156	0.00396856	0.419622
Smim17	0.355253	6.17958	4.84504	0.000212227	0.00315104	0.66356
Arglu1	0.354801	6.07634	5.88006	2.89647e-05	0.00106311	2.63883
Ciart	0.354609	3.14053	3.07176	0.0076744	0.0327463	-2.41374
Pde7a	0.354032	3.97352	4.64662	0.000307967	0.00393992	0.489191
LOC102552294	0.353883	3.10872	2.80215	0.0132966	0.0479132	-2.90323
Camk4	0.353876	5.60571	5.52722	5.58353e-05	0.00148996	2.01855
Nxpe1	0.353744	2.29132	3.00081	0.00887393	0.0362877	-2.46975
Adcy1	0.353421	8.22777	4.49592	0.000467892	0.00517955	-0.150394
Relt	0.353337	4.36425	4.18081	0.000786503	0.00716096	-0.440162
Zfp597	0.353223	4.43119	5.05577	0.000137676	0.00247684	1.22538
Scai	0.352941	5.08031	4.60954	0.000331586	0.00412792	0.315014
LOC108352836	0.352512	0.796691	3.18654	0.00606327	0.027942	-2.13966
LOC108352807	0.351797	1.4799	3.13426	0.0067509	0.0299013	-2.21725
Nvl	0.351537	3.72527	4.78166	0.000235614	0.00333126	0.751603
Sfswap	0.351153	5.82284	7.00967	3.97218e-06	0.000457525	4.60527
LOC102554213	0.350885	1.87028	3.09532	0.00731238	0.0316375	-2.28875
Xylb	0.35069	4.21266	4.8094	0.000223054	0.00323395	0.779198
Rab42	0.350457	1.51235	2.9894	0.00908328	0.0368411	-2.46484
Morn1	0.349925	3.52876	3.37102	0.00414726	0.021487	-1.9003
Slc2a1	0.349555	7.1829	3.77103	0.00213387	0.0138063	-1.62068
Ttc14	0.349518	5.7814	4.93646	0.00017376	0.00280013	0.885942
Hs3st5	0.349492	4.17613	4.39018	0.000514779	0.0055041	-0.0146847
LOC100912167	0.34883	5.28421	4.71426	0.000269239	0.00364093	0.498549
Gba2	0.348804	6.55472	8.13969	6.45896e-07	0.000267894	6.37251
Myt1l	0.348749	6.35065	6.45294	1.0346e-05	0.000678074	3.64634
Prrt2	0.348209	6.92003	5.40124	7.08657e-05	0.00169021	1.7168
LOC100910827	0.348183	9.20791	5.48906	6.00035e-05	0.00155622	1.87328
Ankrd26	0.348143	4.92539	5.25805	9.31507e-05	0.00194289	1.5666
Tbkbp1	0.348096	6.30189	6.89306	4.83717e-06	0.000501507	4.39895
Ankrd13b	0.34793	5.59365	4.27736	0.000669067	0.00650852	-0.41703
Lpin3	0.347518	3.38684	2.90721	0.0107416	0.0413103	-2.75151
Cdh7	0.347447	4.98751	3.55946	0.00295495	0.0170134	-1.78399
Plekha5	0.347442	5.85911	5.93808	2.60432e-05	0.000996281	2.75516
Slc26a6	0.347266	3.9289	5.2555	9.36076e-05	0.00194762	1.61165
Grm1	0.347256	5.0892	5.33556	8.03076e-05	0.00181783	1.69884
Trdmt1	0.347058	4.63093	5.97966	2.41395e-05	0.000953362	2.88665
Tle2	0.347042	3.56193	3.81705	0.00165473	0.0116959	-1.05355
Fam196b	0.346048	4.55108	4.47584	0.000433298	0.00489098	0.111603
Acvr1b	0.345949	5.62595	5.32524	8.19073e-05	0.0018381	1.63964
Slc25a27	0.345678	5.74698	5.07733	0.000132029	0.00241037	1.15971
Popdc2	0.345552	1.93467	2.94863	0.00987202	0.039069	-2.54565
Galt	0.345369	4.24506	3.23832	0.00552648	0.0261876	-2.27399
LOC100909824	0.345346	3.77686	5.27274	9.05627e-05	0.00190893	1.64167
Dph1	0.345093	3.13974	3.5823	0.00268277	0.0160332	-1.46157
LOC103691564	0.344554	2.85143	3.33662	0.0044519	0.022571	-1.89718
Cenpk	0.344283	1.59924	2.99885	0.00890963	0.0363628	-2.45014
LOC102552482	0.344115	0.850179	2.89738	0.0109588	0.041878	-2.61451
LOC103693584	0.343956	5.45837	5.33969	7.96775e-05	0.00181525	1.67903
Eif5a2	0.343539	7.65739	4.66575	0.000318413	0.00402122	0.223901
Per3	0.34304	5.51293	3.81266	0.00178402	0.0122835	-1.35813
Neil2	0.34302	1.33415	2.91534	0.0105652	0.0408929	-2.58763
Mapk11	0.342998	5.02419	4.18873	0.000773953	0.00708545	-0.505024
Stxbp5l	0.342973	5.77945	5.03628	0.000142996	0.0025139	1.07845
Slf2	0.342821	6.00361	5.93491	2.61948e-05	0.000998335	2.7419
Spns2	0.342683	5.64284	6.17446	1.69693e-05	0.000835871	3.18784
Xkr4	0.342178	4.05861	3.16697	0.00632806	0.0287404	-2.37303
Slc9a5	0.341342	5.0573	4.46746	0.000440651	0.00494438	0.0398828
Ebf4	0.341254	3.77764	4.3608	0.0005462	0.00570337	-0.0371079
Scn2a	0.340766	7.39118	5.32063	8.26305e-05	0.00184377	1.55513
Rapgef4	0.340692	6.86253	4.526	0.000419181	0.00480486	-0.0344093
Myo19	0.340416	4.11535	3.63112	0.00242599	0.0149682	-1.48027
Gpr22	0.340363	4.72185	4.6542	0.000303357	0.0039013	0.438236
Eml2	0.340123	7.81129	4.94384	0.000177007	0.00282039	0.798278
Map7	0.340046	7.05272	2.87466	0.013443	0.0483138	-3.38348
Cpeb3	0.339978	7.57132	5.94021	2.59423e-05	0.000996281	2.70845
Pafah1b3	0.339675	3.52486	3.67638	0.00221004	0.0140953	-1.31812
Chrna4	0.3394	5.47191	4.50544	0.000408313	0.00472016	0.0717953
Akap8l	0.339316	6.67262	3.14359	0.00776019	0.0329866	-2.84818
Hs3st4	0.33931	4.04367	3.4349	0.00363548	0.0196299	-1.85132
LOC108348125	0.33903	3.44737	3.95955	0.00123534	0.00959366	-0.773488
Med12l	0.338899	3.76754	5.74196	3.73734e-05	0.00118746	2.46073
Arl6ip4	0.338791	5.59033	5.31799	8.30486e-05	0.00184549	1.62857
Klhl11	0.338545	6.12477	5.10729	0.000124574	0.00232023	1.19079
LOC102548225	0.338479	2.34136	3.18531	0.00607872	0.0279885	-2.1439
Ap3b2	0.338061	7.54873	7.16612	3.05831e-06	0.000435401	4.83461
LOC100912165	0.337897	2.84589	3.49393	0.00321887	0.0180589	-1.60688
Rnf157	0.337616	7.95407	5.04484	0.000141681	0.00249639	1.01412
Rab30	0.337585	6.54524	7.45157	1.91408e-06	0.000333135	5.30728
Nrbp2	0.337461	8.62736	4.87963	0.000201206	0.00308385	0.670555
Tab3	0.337368	4.88194	4.0649	0.000995979	0.00830744	-0.732623
Camk1d	0.336592	6.06932	4.14541	0.000897404	0.00776951	-0.742371
Cplx2	0.336183	6.72736	3.63015	0.00278168	0.0164114	-1.87075
B3galt2	0.335901	4.28893	3.83941	0.00158045	0.0113508	-1.09772
Rbfox1	0.33573	7.66155	3.939	0.00146721	0.0107797	-1.27035
Zfp385b	0.335592	5.53538	2.94041	0.0111848	0.0424621	-3.10793
Syt7	0.335536	7.54111	5.61817	4.70697e-05	0.00135827	2.11464
Nyx	0.335188	1.02144	2.82454	0.0127067	0.0464716	-2.73483
Kif26b	0.335081	4.25378	4.31665	0.000597157	0.00603086	-0.164319
Cpeb4	0.335029	7.37442	7.48677	1.80794e-06	0.000333135	5.35561
Gsto2	0.334992	3.60357	3.61421	0.00251201	0.0153825	-1.44549
Prom1	0.334542	5.08641	3.29706	0.00513941	0.0249701	-2.32455
Rps6kb1	0.334434	5.36775	5.70611	3.99468e-05	0.00123906	2.36283
Epha10	0.334023	5.96798	4.9504	0.000169084	0.00274936	0.898871
Itsn2	0.334005	6.55899	5.87593	2.91851e-05	0.00106563	2.61037
Trmt11	0.333819	2.23747	2.86131	0.0117928	0.0440607	-2.71208
Mtif2	0.333587	4.44531	4.79734	0.000228426	0.00326672	0.738052
Epb41	0.332978	5.99622	6.64523	7.39771e-06	0.000594245	3.98969
Agrn	0.332507	7.50181	6.80077	5.66075e-06	0.000522624	4.22414
Zcchc2	0.331811	4.69512	5.37818	7.40426e-05	0.00173202	1.80509
Ppp4r4	0.331722	4.25286	5.00768	0.000151188	0.00258462	1.14718
Zfp692	0.331486	5.0666	3.04566	0.00868012	0.0357146	-2.817
Cep70	0.331418	4.24602	4.31868	0.000594711	0.00602688	-0.159598
Crbn	0.331262	6.76101	5.81028	3.29352e-05	0.00113596	2.48382
Slc7a6	0.331225	4.96461	5.86546	2.97522e-05	0.0010763	2.67281
Cnr1	0.331172	6.86414	4.94281	0.000171615	0.00278279	0.837726
Usp54	0.331137	8.06163	3.88212	0.00164386	0.0116452	-1.38541
Tmem196	0.331129	5.38184	5.18156	0.000107916	0.00211299	1.3868
LOC500956	0.331026	5.89135	6.91611	4.65174e-06	0.000491519	4.44877
Rassf5	0.330966	5.25745	5.12169	0.000121148	0.00228329	1.28344
Zfp192	0.330963	5.95128	6.31459	1.32115e-05	0.000766464	3.42012
Fen1	0.330208	4.13749	3.27025	0.00510405	0.0248678	-2.1855
Ubash3b	0.330186	5.99975	5.18656	0.000106881	0.0021006	1.35057
RGD1561277	0.330053	4.43334	4.72459	0.000263783	0.00360864	0.600816
Zcchc16	0.329861	3.71487	4.23904	0.000698796	0.00666622	-0.263355
Dock3	0.329637	7.47396	7.06246	3.63541e-06	0.000447214	4.66372
Pitpnm3	0.328888	6.32818	4.93154	0.000175443	0.00281283	0.838978
Kcnh7	0.328136	5.89858	4.04316	0.00109153	0.00879373	-0.922942
Gnl3	0.327479	4.87505	4.41764	0.000487078	0.00531308	-0.0376766
Usp29	0.326976	7.35983	5.90475	2.76818e-05	0.00103734	2.64583
Heatr3	0.32696	4.27816	4.54055	0.000380585	0.00449245	0.26366
Syt2	0.326807	8.19212	2.96578	0.0111095	0.0422686	-3.22145
LOC103691005	0.326787	5.17509	5.29226	8.72393e-05	0.00188125	1.61138
Hrh2	0.326021	2.7993	2.78104	0.013877	0.0494358	-2.9023
Eml6	0.325961	4.98986	3.82979	0.001612	0.0115029	-1.21316
Camk1g	0.325257	5.17531	3.64881	0.00242114	0.0149577	-1.62182
Rasgef1b	0.32489	5.68304	2.9062	0.0119571	0.0445093	-3.19035
Dok6	0.324452	4.76804	5.05958	0.000136659	0.00246333	1.20669
LOC103690742	0.324399	2.61515	3.26388	0.00517146	0.0250792	-2.01535
LOC108348225	0.324337	2.52106	3.41072	0.00382136	0.0202702	-1.74471
Dopey1	0.324149	6.29078	6.20816	1.59738e-05	0.00082056	3.21839
LOC108348121	0.323986	1.43799	2.78928	0.0136477	0.0488413	-2.80157
Ctif	0.323939	5.21796	5.21762	0.000100675	0.00202696	1.46789
Palm3	0.323298	3.957	2.81373	0.0131128	0.0474473	-3.02922
Snapc4	0.322944	4.28004	4.58692	0.000346895	0.00424513	0.352081
Srrm2	0.322587	9.69996	6.69383	6.80194e-06	0.000560766	4.045
Adcy7	0.322201	5.389	5.72225	3.87665e-05	0.00121205	2.39087
Pak1	0.322165	8.06995	4.71729	0.000274769	0.00366921	0.358035
Mturn	0.322045	7.14573	5.78169	3.47221e-05	0.00115791	2.42293
Map2k4	0.322029	6.28809	5.55948	5.25477e-05	0.00143149	2.03769
LOC102546827	0.321824	1.64445	3.09085	0.00737978	0.0318186	-2.29281
Rsad1	0.321693	2.44682	3.35085	0.00432324	0.022116	-1.85045
Slc29a1	0.321659	4.53479	3.99345	0.00115254	0.00918283	-0.828656
Uhmk1	0.321486	7.17402	4.4015	0.000532696	0.00561487	-0.282271
Skil	0.321364	6.22333	5.94664	2.56388e-05	0.000994076	2.75246
Ttc33	0.321278	6.74584	6.61685	7.77067e-06	0.000611657	3.91914
Setd4	0.321217	4.5691	3.4762	0.00333872	0.0185563	-1.85303
LOC102556643	0.321186	3.5409	3.53647	0.0029486	0.0169867	-1.58681
LOC102556047	0.320961	2.6959	3.01552	0.00861102	0.0355236	-2.47111
Aifm3	0.320689	6.71438	2.90945	0.0122525	0.0452969	-3.29121
Ankrd10	0.320274	6.32941	4.17758	0.000832882	0.00741687	-0.690424
Fgd4	0.320171	4.7217	4.04497	0.00103735	0.00852076	-0.75171
Impact	0.320054	8.99418	4.50069	0.000432501	0.00489098	-0.0847462
Csnk1g1	0.319738	3.0063	3.58433	0.00267154	0.0159843	-1.44876
Pstk	0.319522	4.2202	5.09826	0.000126774	0.00235005	1.31667
Stxbp5	0.319501	7.4092	8.13567	6.49895e-07	0.000267894	6.36325
Rgs17	0.319381	6.29501	4.68236	0.000286839	0.00376995	0.353441
Map4k2	0.319159	6.70404	5.25352	9.39633e-05	0.00194998	1.4422
Khk	0.318868	3.28427	3.60493	0.00256053	0.0155157	-1.43078
Ccnl2	0.318705	6.52992	3.80527	0.00185231	0.0125818	-1.47746
LOC108351600	0.318684	3.35577	3.0639	0.00779887	0.0331123	-2.45623
Nwd2	0.318617	4.33428	4.11735	0.000894952	0.0077665	-0.5605
NEWGENE_1305560	0.318499	4.51264	5.65159	4.42188e-05	0.00130426	2.30997
Cacnb2	0.318328	5.52233	5.78541	3.44836e-05	0.00115791	2.49769
Psd3	0.318314	7.79807	5.37238	7.48646e-05	0.00174766	1.64966
Ism2	0.318196	2.87746	3.73808	0.00194645	0.0130161	-1.15783
LOC100362814	0.318146	5.9739	5.67151	4.26057e-05	0.00128152	2.26236
Lmbr1l	0.317739	3.93703	2.90625	0.0107625	0.0413704	-2.84672
Zfp512b	0.317686	5.87149	6.12736	1.84698e-05	0.000861159	3.09334
Rbm25l1	0.317655	4.38058	4.66959	0.000294216	0.0038373	0.500665
LOC102554398	0.317539	3.03206	3.35355	0.00429924	0.0220436	-1.87994
Paqr9	0.316875	4.26949	4.42609	0.000478862	0.00525641	0.0448748
Grhl1	0.316733	2.50979	3.06471	0.00778595	0.0330871	-2.36859
LOC679894	0.316458	5.13837	4.85313	0.000204642	0.00311421	0.780628
Kcnab1	0.316072	6.27439	4.14918	0.000877263	0.00768447	-0.739283
Mdm4	0.315558	7.26027	5.84779	3.07349e-05	0.00109168	2.54279
Slc6a6	0.315393	7.03693	2.86243	0.0134458	0.0483138	-3.39262
Ank1	0.315282	7.93442	3.59931	0.00291793	0.0168912	-1.94726
Sh3tc1	0.31517	3.07174	3.06209	0.00782786	0.0331752	-2.42367
Zdhhc22	0.31507	4.11152	3.43493	0.00363529	0.0196299	-1.86196
Mphosph9	0.315043	3.53448	3.15269	0.00650014	0.0292579	-2.31506
Zfand4	0.315036	3.30725	4.32399	0.000588355	0.00597665	-0.0849441
Arfgef3	0.315001	6.87695	5.53587	5.49337e-05	0.00148155	1.9714
Tigd3	0.314861	2.36934	2.92816	0.0102927	0.0401857	-2.60275
Grm5	0.314587	5.72402	5.44283	6.54872e-05	0.00162661	1.85318
Smox	0.31426	6.41604	3.32317	0.00510004	0.0248607	-2.4475
Mef2a	0.314121	6.54671	5.81853	3.24376e-05	0.00112661	2.5057
Ptpdc1	0.314069	5.7336	4.74766	0.000252001	0.00350252	0.522778
Tenm1	0.314017	5.69916	3.04149	0.00892459	0.0364049	-2.92177
Nrip3	0.313919	7.18275	4.62047	0.000327053	0.00408856	0.190336
Prpf40b	0.313857	6.06158	6.88886	4.87178e-06	0.000501507	4.39854
Tia1	0.313853	5.48737	5.02246	0.000146894	0.00254553	1.0751
Tfrc	0.313676	7.04429	4.59492	0.000344231	0.00422242	0.142599
LOC102554796	0.313549	2.93303	2.87384	0.0114964	0.0432674	-2.75126
G2e3	0.313451	3.84708	3.42603	0.00370263	0.0198624	-1.83917
LOC102551140	0.313218	3.49775	3.06664	0.00775526	0.0329835	-2.47157
Letm2	0.313083	4.99506	4.51237	0.000402684	0.00467926	0.134201
Glra3	0.313017	1.93587	2.89379	0.0110391	0.0420414	-2.64069
Slc8a1	0.312974	7.84869	6.50143	9.50235e-06	0.000655704	3.70724
Begain	0.312708	6.4752	4.66881	0.000294671	0.00384004	0.316414
Aqp11	0.312486	3.53035	3.05476	0.00794638	0.0336048	-2.49879
Cdk14	0.312034	7.34693	4.58332	0.000354255	0.00428994	0.109302
Armcx6	0.312031	3.81553	3.12615	0.00686415	0.0301938	-2.40918
Pclo	0.311925	7.45367	5.85577	3.02868e-05	0.00108134	2.55515
LOC100363116	0.311638	1.91381	2.80481	0.0132251	0.0477101	-2.79299
Ica1l	0.311565	4.40806	3.84926	0.00154881	0.0112006	-1.095
Mbd6	0.311501	5.9347	4.42433	0.000480559	0.00526397	-0.130664
Ksr1_1	0.311173	3.46503	3.67865	0.00219976	0.0140492	-1.30791
Bend5	0.31114	2.95987	3.94663	0.00126848	0.0097831	-0.775472
Hecw1	0.311039	6.57278	4.04961	0.00108489	0.0087642	-0.96423
Mbnl1	0.310833	5.92683	6.084	1.99738e-05	0.000881322	3.01344
Adam23	0.310661	8.68454	3.6173	0.0027834	0.0164154	-1.9038
Snx4	0.310637	5.95358	5.20656	0.00010284	0.00206259	1.39172
Camk2g	0.310469	4.62852	3.909	0.00137016	0.0103035	-1.00776
LOC108348154	0.310458	3.91059	3.23776	0.00545702	0.0259814	-2.21125
Zfp59	0.309747	3.84301	2.96234	0.00959952	0.0383295	-2.72432
Rasa2	0.309606	3.67853	3.91633	0.00134973	0.0102087	-0.875357
Pgr	0.309361	2.93011	3.72105	0.00201587	0.013301	-1.19124
Kdelc1	0.308811	4.06684	4.10584	0.000916194	0.00788287	-0.551553
Ccnt2	0.308565	6.62553	5.21949	0.000100313	0.00202228	1.38002
Pgm2l1	0.30807	7.72545	4.73232	0.000259775	0.00356627	0.410211
Zfp326_1	0.307264	4.40224	3.80297	0.00170333	0.0119271	-1.18517
Gli1	0.307163	4.24234	4.84751	0.000206917	0.00311779	0.848514
Chrm3	0.307045	4.26535	3.53535	0.0029554	0.0170134	-1.68994
Rbfox3	0.306687	6.07891	4.50933	0.000405142	0.00469389	0.0264415
Ankrd28	0.306552	6.75558	7.10958	3.36012e-06	0.000440873	4.749
Ttbk2	0.306505	7.63031	5.79979	3.35795e-05	0.00114595	2.45063
Rims2	0.306457	5.46038	5.41897	6.85182e-05	0.00166657	1.82698
Lhfpl5	0.306417	4.04933	4.27185	0.000653826	0.00640496	-0.229764
Fam163b	0.306144	5.31776	3.50205	0.00327279	0.0182763	-1.93167
Tarsl2	0.306051	4.72385	4.24478	0.000690714	0.00661826	-0.35893
LOC102549726	0.305502	4.17751	3.16668	0.00631599	0.0287404	-2.39264
Nr6a1	0.305198	3.33352	2.8368	0.0123947	0.0456481	-2.87312
Fam13c	0.305178	5.52105	5.23238	9.78574e-05	0.00199025	1.47204
RGD1562660	0.305041	1.91094	3.03673	0.00824529	0.0344411	-2.3918
Ccdc85a	0.305035	3.36387	3.66949	0.00224162	0.0142272	-1.31585
Armc6	0.304203	3.13948	3.85898	0.00151823	0.0110326	-0.944188
LOC102547903	0.304191	4.37097	4.4951	0.000416871	0.0047886	0.167286
Peli3	0.304187	5.67203	4.59806	0.000339263	0.00418417	0.235076
Prkacb	0.303608	8.93631	4.87593	0.000195667	0.00303458	0.692909
Atp11b	0.303565	5.58603	6.30361	1.34719e-05	0.000770158	3.4168
Plcxd2	0.303477	7.13843	4.4273	0.000484476	0.0052948	-0.197448
Ercc6	0.303265	5.20014	4.67826	0.000289186	0.0037938	0.436388
Zbed6	0.303257	6.44496	3.96338	0.00128203	0.0098488	-1.12352
LOC102557516	0.303173	2.81163	2.81347	0.0129952	0.047229	-2.84586
Rad18	0.303156	2.88335	3.24225	0.00540687	0.0258211	-2.0734
Zgpat	0.302988	4.89101	5.12205	0.000121065	0.00228329	1.31415
Myt1	0.302915	4.65136	3.37197	0.00413908	0.0214613	-2.07125
Zfp40	0.302669	3.98362	4.24788	0.000686384	0.00658904	-0.269434
Nfatc2	0.30252	5.75924	4.04505	0.00103719	0.00852076	-0.871772
LOC102556004	0.302489	4.16926	3.14211	0.00664293	0.0295947	-2.4386
Tsc1	0.302488	6.71689	6.54531	8.80071e-06	0.000631759	3.79625
Zfp791	0.302335	1.99683	2.91842	0.0104992	0.040738	-2.6005
Gigyf1	0.302248	6.53318	5.21392	0.000101394	0.0020362	1.37309
LOC102555377	0.302246	3.27001	3.58537	0.00266582	0.0159718	-1.46643
Tbc1d30	0.30208	5.33983	3.47204	0.0034792	0.0190753	-1.99371
Atp2b2	0.301943	9.05134	3.82872	0.00175198	0.0121536	-1.4564
Baz2b	0.301875	6.362	5.01904	0.000147877	0.00255668	1.00659
Cplx1	0.301773	9.90889	3.8125	0.00180053	0.0123537	-1.47385
Prdm15	0.301559	4.1459	4.80127	0.00022666	0.00326373	0.768311
Nktr	0.301515	7.01403	4.62787	0.000319684	0.00402883	0.215002
Fam161b	0.30146	4.32575	5.80927	3.29967e-05	0.00113596	2.59297
Dgkq	0.301025	6.33711	6.14636	1.78484e-05	0.000851231	3.10659
Rbsn	0.301015	6.36448	5.82951	3.17876e-05	0.00111392	2.53297
Vsnl1	0.300473	9.21299	4.13725	0.000903108	0.0077984	-0.811002
Fv1	0.300332	5.38677	3.94163	0.00128153	0.0098488	-1.03916
Nrg1	0.300072	6.25099	4.82959	0.00021435	0.00315859	0.644738
Rps6ka5	0.300045	5.53989	4.78768	0.000232824	0.0033034	0.617456
Cbx7	0.299567	6.16464	5.91663	2.7086e-05	0.00101989	2.7007
Cacna1h	0.29956	5.78633	4.12243	0.000885736	0.00772074	-0.719441
Rmnd1	0.299546	4.8706	4.75081	0.000250431	0.00348999	0.60921
LOC685152	0.29921	6.87278	6.87703	4.97065e-06	0.000501507	4.35968
Adra1b	0.29847	3.4956	3.25283	0.00529038	0.0254684	-2.12041
St8sia1	0.298394	4.44647	3.73861	0.00194436	0.0130155	-1.31812
Nap1l2	0.298085	6.76851	4.8012	0.000226694	0.00326373	0.563926
Hapln1	0.297473	5.28149	2.84173	0.0130054	0.0472442	-3.23409
Homer2	0.297325	3.36292	3.19023	0.00601755	0.0278214	-2.22087
Mecom	0.296786	2.86419	3.06126	0.00784127	0.0332231	-2.40342
Rbmx	0.296648	5.92118	5.57663	5.08811e-05	0.0014066	2.08985
Akain1	0.296587	3.74649	3.05202	0.00799108	0.0337482	-2.53859
LOC691170	0.29644	4.55501	4.84632	0.000207401	0.00311779	0.82133
Prdm11	0.296364	5.07567	6.11225	1.898e-05	0.000866403	3.10405
Cacna1e	0.29597	7.50012	4.73071	0.000260603	0.00357451	0.409365
Ccnl1	0.295909	4.93528	5.0899	0.000128847	0.00238247	1.24989
Col4a3bp	0.295858	7.25489	6.55378	8.6717e-06	0.000629334	3.80244
Yod1	0.295705	2.39924	2.89702	0.0109667	0.041898	-2.65973
Atp10a	0.295554	4.079	3.00432	0.00881051	0.0360899	-2.68681
Slc6a17	0.295048	8.5274	3.93077	0.00138997	0.010388	-1.23863
Pla2g4e	0.294599	4.27958	4.69642	0.000278945	0.00370524	0.560383
Ppm1k	0.293985	6.58367	3.73529	0.00207061	0.0135327	-1.59845
Cpeb2	0.293916	6.80032	5.65614	4.38453e-05	0.00129747	2.1978
Ptchd1	0.293747	3.30241	2.9752	0.0093508	0.0375759	-2.61367
LOC100912071	0.293565	2.39044	3.0415	0.00816513	0.0342433	-2.40288
Zdhhc20	0.293494	6.25318	4.13479	0.000863713	0.00760495	-0.733631
Arid3a	0.293391	3.50998	4.47584	0.00043329	0.00489098	0.191589
NEWGENE_1565481	0.293185	4.8191	5.68067	4.18846e-05	0.00127891	2.34861
Kctd16	0.293147	4.26144	3.37219	0.00413724	0.0214613	-2.00811
Csrnp3	0.293009	3.86895	3.78322	0.00177388	0.0122458	-1.15238
Snrnp48	0.292846	4.71237	3.9079	0.00137323	0.0103167	-1.0214
Mtap	0.292809	4.9029	4.79296	0.000230412	0.00328107	0.687049
Zfp280c	0.292688	4.21447	4.21369	0.000735687	0.00688399	-0.359427
Kcnq2	0.292418	8.07787	5.45238	6.43135e-05	0.00161185	1.79995
Ankrd29	0.29238	5.47582	3.82981	0.00161193	0.0115029	-1.27308
Rock2	0.292321	7.46216	6.41232	1.11129e-05	0.00070072	3.55379
LOC688452	0.292264	4.63181	3.49772	0.00319384	0.0179828	-1.82067
Matk	0.292208	6.13795	4.71508	0.000268801	0.00364093	0.427849
Nsf	0.292092	9.76156	3.97076	0.00126305	0.00975565	-1.13596
LOC360998	0.292033	5.51173	2.87907	0.0120912	0.044902	-3.19592
RGD1562465	0.292007	2.13342	2.86456	0.0117153	0.0438465	-2.7005
Zfp418	0.291895	2.50121	2.95214	0.00980141	0.0388879	-2.56924
Dhodh	0.291748	2.68576	3.04528	0.00810219	0.0340705	-2.41654
LOC102550657	0.29163	3.12064	3.0425	0.0081484	0.0341914	-2.46558
Timm9	0.29118	4.4193	4.67474	0.000291217	0.0038077	0.506846
Hivep2	0.291083	6.55541	6.58831	8.1657e-06	0.000611998	3.87436
Pcdhb11	0.290933	3.63875	3.29054	0.00489524	0.0241585	-2.06885
Tmem63c	0.290718	5.9019	4.83405	0.000212476	0.00315104	0.677681
Mbtd1	0.290677	4.85464	4.07004	0.000985584	0.00825572	-0.719396
Adipor2	0.290654	7.00515	3.1985	0.00651756	0.029297	-2.71594
Slitrk5	0.29064	4.98637	4.26778	0.000659244	0.0064379	-0.344927
Ogfod1	0.2906	5.38932	4.55611	0.000368916	0.00441135	0.179164
Fign	0.290536	3.43329	3.11014	0.00709342	0.0309503	-2.3807
Sidt1	0.290505	4.78528	5.40851	6.98938e-05	0.00168444	1.85493
Prkcg	0.290128	4.90705	3.47889	0.00332029	0.0184822	-1.89921
Nova1	0.290106	6.82611	5.31303	8.38408e-05	0.00184709	1.55164
Lnp	0.289952	5.74953	5.47525	6.159e-05	0.00157315	1.91192
Atg16l2	0.289906	2.96001	3.45207	0.00350908	0.0191908	-1.69148
LOC100911553	0.28988	2.44153	3.65091	0.00232906	0.0146416	-1.30897
Ccdc84	0.289841	3.37132	3.45139	0.003514	0.0192056	-1.72944
Fam214a	0.289833	5.88827	4.97176	0.000162168	0.00268006	0.945754
Shd	0.28978	5.76861	4.34883	0.000559559	0.00578543	-0.266359
Stac2	0.289656	6.64446	3.68236	0.00231105	0.0145558	-1.70877
Epha7	0.289638	3.78828	3.52966	0.00299025	0.0171477	-1.63138
Rgs7bp	0.289541	7.67386	4.66106	0.000299245	0.00386428	0.269921
Fam189b	0.288975	5.89054	4.27948	0.000643807	0.00633454	-0.415263
Ryr3	0.288946	5.74275	5.60967	4.78252e-05	0.00136441	2.16193
Ankzf1	0.288875	4.82133	3.64871	0.00233967	0.0146712	-1.55008
Tanc2	0.288873	7.67296	5.40532	7.03184e-05	0.00168678	1.71304
Necab3	0.288531	4.28258	3.69725	0.0021171	0.0137318	-1.37566
Zranb2	0.288363	7.4515	7.07231	3.576e-06	0.000447214	4.68017
Lin54	0.288274	4.30872	3.84971	0.00154737	0.0112006	-1.08063
Palm2	0.288045	4.25544	4.14061	0.000853542	0.00753657	-0.505935
LOC102555191	0.287899	3.8803	3.62119	0.00247615	0.0152163	-1.46713
Scn3a	0.287871	6.32277	3.38429	0.00431202	0.0220875	-2.29221
Txlng	0.287815	4.37417	4.28987	0.000630407	0.0062651	-0.229778
Fam193b	0.287796	5.46326	4.42264	0.000482196	0.00527821	-0.0909403
Safb2	0.287688	6.64782	4.26884	0.000657828	0.00642808	-0.487848
Ero1b	0.287463	5.66813	3.45544	0.00359897	0.0195134	-2.066
Hyal3	0.287214	3.77961	3.83771	0.001586	0.0113646	-1.03691
Nin	0.287049	3.85486	3.97365	0.00120019	0.0094329	-0.783496
Pnpla3	0.286966	3.21337	3.09191	0.00736379	0.0317846	-2.3855
Noc2l	0.28688	5.88078	5.83033	3.17396e-05	0.00111392	2.55847
Wdr60	0.286168	4.85539	3.46892	0.0033892	0.0187195	-1.91134
Atl1	0.285296	7.00294	4.40322	0.000501426	0.00542052	-0.23155
Myo5a	0.285275	8.43216	5.1293	0.000119377	0.00226727	1.18292
Kcnj3	0.285272	4.644	3.19351	0.00597703	0.0276831	-2.42002
Dcx	0.285203	5.18724	5.41171	6.94692e-05	0.00168186	1.83301
Smg1	0.285165	7.78011	5.76439	3.5852e-05	0.00117296	2.38425
Ikzf2	0.285153	3.54676	3.99913	0.00113924	0.00908606	-0.706072
LOC102549817	0.285002	1.93832	3.01313	0.00865317	0.0356318	-2.4337
Mllt10	0.284284	5.42852	4.61442	0.000328372	0.00410177	0.289533
RGD1561327	0.284277	6.12582	3.36414	0.00445254	0.022571	-2.3103
Eny2	0.284135	6.06723	5.04162	0.000141515	0.00249628	1.06796
Mtr	0.28411	5.04857	5.34941	7.82137e-05	0.0017964	1.72728
Cntn5	0.283818	3.70933	2.88471	0.011245	0.0426024	-2.84673
Atxn7l2	0.283696	3.71669	3.11139	0.00707532	0.030886	-2.42137
Lnc215	0.283381	5.70579	3.09772	0.00767226	0.0327461	-2.79139
Hook1	0.28306	5.40825	4.66835	0.000294939	0.00384033	0.396908
Hs6st3	0.283037	3.9472	3.64263	0.00236915	0.0147732	-1.43476
Rad52	0.282874	3.44712	3.17628	0.00619259	0.0283794	-2.25837
Zfc3h1	0.282788	6.48886	5.08937	0.000128979	0.00238247	1.13589
RGD1565775	0.282786	5.71894	5.67024	4.27066e-05	0.00128152	2.27501
Prdm10	0.282773	3.98566	4.59218	0.00034327	0.00422055	0.385598
Foxred1	0.282746	5.63356	5.43962	6.58873e-05	0.00163216	1.85329
Cacna1b	0.282404	6.93739	4.68228	0.000286886	0.00376995	0.324506
Thsd7a	0.282154	6.56408	4.83333	0.000212776	0.00315104	0.63503
Rab27b	0.282148	5.83061	4.09091	0.000944503	0.00801012	-0.786815
Micu3	0.281964	6.74277	5.1171	0.00012223	0.00229295	1.17906
Stx3	0.281643	4.91074	4.16713	0.000808692	0.0072812	-0.534619
Gpatch8	0.281338	6.51242	5.57835	5.07171e-05	0.00140608	2.06261
Nt5dc3	0.280528	5.70076	4.71659	0.000268002	0.00364093	0.464681
Dock9	0.280155	7.50542	4.30597	0.000610194	0.00613121	-0.435851
Tmod2	0.28013	7.17785	5.73393	3.79346e-05	0.001198	2.33418
Hsf4	0.280062	4.04144	3.89257	0.0014171	0.0105301	-0.961987
Gabrb3	0.279919	5.60218	3.86629	0.00149562	0.0109117	-1.21403
Arhgap18	0.279804	4.24103	5.05271	0.000138497	0.00248522	1.23125
Tbrg4	0.279789	4.98694	4.54835	0.000374688	0.00444966	0.205061
Arl4c	0.27977	5.79733	5.44586	6.51122e-05	0.00162149	1.85386
Cabp1	0.279742	6.2777	4.12136	0.00088767	0.00772411	-0.762391
Utrn	0.279668	7.67146	4.86034	0.000201757	0.00308385	0.662297
Nphp4	0.279648	4.5064	2.94972	0.00984997	0.0390212	-2.86818
Grik2	0.279465	5.00588	4.57018	0.000358687	0.0043319	0.245566
RGD1560784	0.27937	5.44409	3.0434	0.00847496	0.0351474	-2.85794
Dck	0.278972	3.82204	2.87721	0.0114177	0.0430645	-2.88079
Kmt2a	0.27897	7.73214	5.9098	2.74269e-05	0.00103025	2.65172
Snx32	0.278869	5.77464	5.70457	4.00616e-05	0.00124017	2.33472
Arpp21	0.278842	6.13319	3.57737	0.00280709	0.0165178	-1.87013
Kcnk4	0.278437	3.50865	3.11976	0.00695483	0.0304429	-2.37355
Esrrg	0.27829	6.4159	3.98325	0.00117686	0.00930087	-1.0494
LOC108349564	0.277956	2.4943	2.96247	0.00959694	0.038329	-2.55033
Abcc8	0.277877	5.21939	5.04416	0.000140818	0.00249375	1.13899
Plekhm3	0.277856	6.76588	4.71405	0.000269355	0.00364093	0.392611
Zfyve27	0.277694	6.42739	4.68723	0.000284079	0.00374563	0.355063
Acap3	0.277667	5.92618	6.42883	1.07942e-05	0.000695625	3.62015
Zfp292	0.276533	5.67774	7.06026	3.64884e-06	0.000447214	4.69137
Rab11fip2	0.276384	4.10836	4.30134	0.000615933	0.0061687	-0.179097
Rasgrf1	0.276235	9.31454	4.62582	0.000320997	0.00404188	0.203536
Pja2	0.276179	9.55424	5.19542	0.00010507	0.00207766	1.31792
Parp8	0.275989	5.22507	4.30891	0.000606581	0.00611421	-0.290767
Tnrc6c	0.275948	6.35024	6.08595	1.99033e-05	0.000880694	2.99796
LOC103691988	0.275756	3.85161	3.04452	0.00811475	0.0340932	-2.57066
Zmat4	0.275742	5.69524	3.0861	0.00779997	0.0331123	-2.80848
Zfp182	0.275602	4.35954	4.06751	0.000990691	0.00828374	-0.661234
Stx1b	0.275431	9.52746	4.70419	0.000274675	0.00366921	0.360803
Kcnip3	0.275315	5.12789	4.17401	0.000797458	0.00721211	-0.546826
Trpc5	0.275012	5.54988	4.39149	0.000513419	0.00550039	-0.161096
Ganc	0.274968	5.09201	4.67949	0.00028848	0.00378772	0.449318
Dgke	0.2749	6.71834	6.7654	6.01422e-06	0.000538324	4.17354
Golga1	0.274547	5.50766	5.30362	8.5363e-05	0.00186058	1.60732
Agtpbp1	0.274193	7.87918	4.60759	0.000332873	0.00413492	0.162353
Miga1	0.273989	7.17155	6.75141	6.16036e-06	0.000542111	4.14297
Mapk12	0.273893	4.79563	4.00366	0.00112872	0.00902513	-0.843247
Sntg1	0.27374	3.30835	3.30395	0.0047618	0.023679	-2.00054
Slc17a5	0.273284	4.5721	4.13882	0.000856649	0.00755974	-0.548322
Mrps31	0.273038	4.65531	5.6818	4.17965e-05	0.00127891	2.35836
Ubn2	0.272881	6.31911	5.67106	4.26413e-05	0.00128152	2.24336
Tmem268	0.272838	4.47668	3.27796	0.00502371	0.0245911	-2.22756
Ncam2	0.27283	6.65407	3.56955	0.00286734	0.0167283	-1.92474
Stx2	0.272622	4.87688	2.89575	0.0111952	0.042481	-3.04595
Tef	0.272303	7.36649	5.14183	0.000116519	0.00223945	1.21275
Rps6kl1	0.2721	5.39164	3.64332	0.00236576	0.0147639	-1.63653
Orai2	0.271946	5.98374	4.22543	0.000718358	0.0067663	-0.531282
Sfmbt1	0.271861	5.51904	4.36387	0.000542824	0.00568368	-0.212724
Akt3	0.271737	5.87525	4.71462	0.000269051	0.00364093	0.446401
Lrrc45	0.271689	5.172	4.59143	0.000343783	0.00422242	0.269807
LOC102553001	0.271232	3.89371	3.23198	0.00552233	0.0261809	-2.2199
Tcea2	0.270985	6.13819	3.87022	0.00148361	0.0108594	-1.25711
Kctd3	0.270982	6.76826	3.79833	0.00175523	0.0121654	-1.45533
Ppp3ca	0.270924	7.8745	4.87085	0.000197632	0.00305542	0.681314
Cntnap2	0.27087	7.5595	6.8413	5.28235e-06	0.000501507	4.29244
Mpp7	0.270808	3.57208	3.61531	0.00250632	0.0153646	-1.4401
Ogfrl1	0.270651	5.38922	3.03094	0.00857836	0.0354355	-2.86685
Cyfip2	0.270517	9.58809	4.85946	0.00020211	0.00308562	0.666731
Trub1	0.270349	3.40565	2.94248	0.00999649	0.0394321	-2.68948
Scyl3	0.270282	4.30149	4.91159	0.000182438	0.00288076	0.964453
Efr3a	0.270276	7.83224	3.79463	0.00179547	0.0123335	-1.4956
Sec24a	0.270211	4.29778	4.11908	0.000891804	0.0077462	-0.55299
Eaf1	0.270123	5.08762	4.55587	0.000369095	0.00441135	0.209112
Zfp94	0.270106	3.46984	3.71754	0.00203049	0.0133806	-1.23456
RGD1309779	0.27005	4.17229	4.23399	0.000705986	0.00670623	-0.315616
Bag4	0.269663	4.80394	3.20595	0.00582611	0.0271931	-2.42169
Gnl2	0.269489	5.55764	5.13552	0.00011795	0.00225039	1.2852
Atxn7	0.269333	4.67503	4.49496	0.000416985	0.0047886	0.134727
Adam22	0.26915	7.86166	5.24248	9.59767e-05	0.00197294	1.40142
Faxc	0.268604	4.18992	3.60523	0.00255893	0.0155145	-1.54231
Trmt6	0.268504	3.95262	4.1337	0.00086564	0.00761763	-0.485872
Fam49a	0.268211	4.70522	3.45072	0.00351883	0.0192186	-1.92481
Osbp2	0.268129	5.53184	4.14359	0.00084838	0.00750368	-0.651937
Nbea	0.268026	7.75776	6.72999	6.39127e-06	0.000547064	4.10206
Setd5	0.26798	7.16886	6.84485	5.25048e-06	0.000501507	4.30158
Ppp3r1	0.267848	8.20908	4.79702	0.00022857	0.00326672	0.535336
Ogt	0.267686	8.1047	6.02328	2.22977e-05	0.000928911	2.85665
Tmem8a	0.267484	4.62758	3.7003	0.00210386	0.0136912	-1.42026
Cadps	0.267308	8.08765	3.58818	0.00276913	0.0163682	-1.91916
Las1l	0.267286	5.39877	4.84431	0.000208224	0.00312647	0.739591
LOC102550851	0.267164	3.9322	3.79584	0.00172847	0.0120708	-1.13601
RGD1308428	0.267147	5.81626	5.70811	3.97989e-05	0.00123693	2.33869
Inpp4a	0.267146	7.57052	6.53366	8.98159e-06	0.000635743	3.76481
Slc4a7	0.267076	5.23606	3.25993	0.00521364	0.0252135	-2.37938
Camk2d	0.266989	7.33783	5.39018	7.23714e-05	0.00171166	1.68788
Dcaf17	0.266748	4.76316	4.50983	0.000404738	0.00469269	0.153937
Unc5a	0.266705	5.45919	4.1196	0.000890846	0.00774374	-0.69218
Klf13	0.266639	3.28008	3.00039	0.00888165	0.0362877	-2.56402
Pusl1	0.266622	4.52225	5.35593	7.72482e-05	0.00178206	1.77424
Nxpe3	0.266414	5.10543	5.30945	8.44158e-05	0.00185279	1.64856
Ddhd2	0.266413	6.92395	5.77658	3.50519e-05	0.00116325	2.41758
LOC100911266	0.266413	4.18943	4.04526	0.00103674	0.00852076	-0.683564
Mfsd10	0.26625	4.4049	3.80526	0.00169534	0.0118902	-1.18136
Rcan2	0.266229	8.46915	4.43055	0.000474584	0.00523145	-0.190931
Chchd7	0.266098	3.60344	3.34073	0.00441435	0.0224613	-1.96835
Ptch1	0.266052	6.89501	4.63989	0.000312125	0.00396856	0.241955
Cry2	0.265957	6.86032	5.006	0.000151684	0.00258462	0.960451
Dlgap2	0.265655	3.48482	2.96253	0.00959581	0.038329	-2.66445
Dus1l	0.26562	4.31057	3.7926	0.00174001	0.012119	-1.19297
Ap4e1	0.265443	4.27365	4.35352	0.000554287	0.0057499	-0.0956494
Arhgef6	0.265287	4.98861	5.28303	8.87937e-05	0.0018945	1.60805
Setdb2	0.265286	3.96848	3.32215	0.00458661	0.0230271	-2.05839
Phip	0.265087	6.20887	5.71769	3.9096e-05	0.00121981	2.33477
Naa16	0.264776	4.23017	3.24823	0.00534078	0.025607	-2.24426
Epha5	0.264661	5.64466	4.32137	0.000591483	0.00600065	-0.309392
Cog2	0.264602	5.17718	3.23704	0.00546511	0.026012	-2.41655
Zfp157	0.264602	4.6423	4.86183	0.000201167	0.00308385	0.842868
Wdr19	0.264228	5.63012	3.76739	0.00183258	0.0125133	-1.41544
RGD1304884	0.264065	8.74008	5.36952	7.52731e-05	0.00175131	1.64407
Zfp612	0.263952	7.15914	4.22821	0.000714319	0.00675089	-0.586012
Ralgapa2	0.263912	4.81597	3.68292	0.00218049	0.0140038	-1.48169
Cacng2	0.263778	5.72274	4.14705	0.000842414	0.00747448	-0.664415
L1cam	0.263081	8.18335	4.4975	0.000414866	0.0047818	-0.0576871
Ero1a	0.262303	6.38494	4.59017	0.000344646	0.00422421	0.165793
Osbpl10	0.26186	4.31012	3.2516	0.00530377	0.0254951	-2.25114
Srrm1	0.261675	7.32146	4.64015	0.000311962	0.00396856	0.232943
Trim66	0.261648	5.60212	3.5294	0.00299187	0.0171477	-1.8893
Dph7	0.261626	4.12217	3.37798	0.00408812	0.0213383	-1.97471
Ppp2r3a	0.261542	5.79507	5.25903	9.2976e-05	0.00194183	1.50211
Osbpl8	0.261479	5.69833	4.52653	0.000391416	0.00459262	0.0916162
Dhdh	0.261413	3.59205	3.67058	0.00223659	0.0142094	-1.33673
Nop56	0.261202	6.27029	6.00744	2.2949e-05	0.000936389	2.86001
Ankrd13d	0.261115	6.19172	5.56411	5.20916e-05	0.00142828	2.05106
Pkia	0.260877	7.44742	3.66353	0.00233519	0.0146607	-1.7509
Vcpip1	0.260706	5.89301	4.99766	0.000154172	0.00259952	0.995252
Bsn	0.260249	7.46671	6.01174	2.277e-05	0.000936389	2.8393
LOC498122	0.260218	3.65182	3.1026	0.00720404	0.0312674	-2.42789
LOC103690074	0.260134	3.22124	3.32827	0.00452916	0.0228412	-1.94531
Prune2	0.260127	8.12521	3.03744	0.00883058	0.0361343	-3.03313
Cds1	0.260095	6.19253	3.82242	0.00163658	0.011605	-1.35766
Map3k2	0.260091	3.05541	2.98504	0.0091647	0.0370371	-2.56351
Cpne6	0.259888	6.02684	3.04167	0.00852892	0.0353058	-2.93006
Pnn	0.259843	6.48603	4.86034	0.000201757	0.00308385	0.691504
RGD1566265	0.259761	4.15146	3.6096	0.00253597	0.0154566	-1.52812
Mgea5	0.259743	7.70044	5.78021	3.4817e-05	0.00115791	2.41399
Lrp1b	0.259627	5.84295	4.97219	0.000162031	0.00268006	0.949795
Brsk2	0.259558	6.2201	5.01661	0.000148578	0.00255815	1.00987
Hdac7	0.25954	4.72594	3.12259	0.00691452	0.0303302	-2.57201
Kcnc2	0.259414	6.43894	3.79099	0.00174577	0.0121429	-1.43854
Apbb3	0.259292	5.8939	5.46639	6.2631e-05	0.0015873	1.88593
Wdyhv1	0.258834	3.64256	3.77062	0.00182044	0.0124677	-1.15082
Xrn1	0.25868	5.72249	5.56217	5.22819e-05	0.00142922	2.0752
Hs6st2	0.258567	5.83371	3.15509	0.00663886	0.0295871	-2.67655
Cpsf6	0.258401	6.99697	6.30807	1.33654e-05	0.000769095	3.37573
Cdyl2	0.258252	4.9046	4.16029	0.000820033	0.00735261	-0.547574
RGD1310429	0.258247	5.63619	3.67757	0.00220465	0.0140724	-1.59629
Hhipl1	0.258167	4.37372	3.94923	0.00126172	0.00975015	-0.894629
Jade2	0.257933	5.99867	3.98967	0.00116149	0.00922131	-1.0052
Ppm1e	0.257824	6.40128	3.95467	0.00124776	0.00966137	-1.10617
Trpm4	0.257724	3.49637	3.43981	0.0035989	0.0195134	-1.76589
RGD1310081	0.257674	5.5493	4.70453	0.000274487	0.00366921	0.454429
Thumpd2	0.257509	3.75893	2.88375	0.011267	0.0426433	-2.85745
Cep85	0.257396	4.51219	3.9001	0.00139538	0.0104082	-1.00981
Caprin2	0.257097	4.63028	3.59183	0.00263059	0.0158605	-1.63503
Esyt2	0.257013	6.42549	5.3641	7.60544e-05	0.0017623	1.66359
Rmi1	0.256973	5.28807	4.44943	0.000456903	0.00507224	-0.0204683
Zfp451	0.256715	5.87225	6.26577	1.4411e-05	0.000789278	3.33769
Ttc3	0.256533	9.71413	5.4354	6.64162e-05	0.00163411	1.77677
Nkiras1	0.256505	6.46231	3.2844	0.00512961	0.0249457	-2.48039
Dpp10	0.256239	6.81016	4.05886	0.00100834	0.0083458	-0.916845
Zfp654	0.255924	4.76229	4.03005	0.00106944	0.00868737	-0.786955
Tmem235	0.255702	3.22195	3.01701	0.00858484	0.0354529	-2.5255
LOC102555911	0.255552	5.3697	3.30105	0.00479039	0.02378	-2.31593
Erg	0.255505	3.33261	3.28218	0.00498018	0.0244468	-2.0444
Fyttd1	0.25546	7.04027	5.47474	6.16494e-05	0.00157315	1.85265
Lrp2	0.255245	5.31136	3.19476	0.0059617	0.0276366	-2.51839
Akap11	0.255236	8.43081	5.6945	4.08194e-05	0.00125865	2.25352
RGD1562310	0.255214	4.6862	4.46219	0.000445336	0.0049898	0.0697828
RGD1306148	0.255161	7.7726	6.29129	1.37702e-05	0.000775889	3.33819
Nr2c1	0.255044	4.67511	3.61388	0.00251373	0.0153869	-1.59807
Ptpn3	0.254893	4.59249	3.15236	0.00650453	0.0292579	-2.4919
Sf3b1	0.25473	8.27469	6.28213	1.39967e-05	0.000777914	3.32068
Wwp1	0.25451	6.28497	4.84738	0.000206968	0.00311779	0.677206
Atp6v1b2	0.25449	9.15886	5.14721	0.000115313	0.00222721	1.22147
Cdh18	0.254477	5.13123	2.78914	0.0139068	0.0495033	-3.29023
Rab9b	0.254459	6.69863	3.51548	0.00314622	0.0177915	-2.02307
LOC691113	0.254168	4.0726	4.14481	0.000846274	0.00748929	-0.477192
Dnajc21	0.254057	4.65778	3.64622	0.00235171	0.0147231	-1.53163
Ufd1l	0.253836	6.26844	3.28723	0.0050709	0.0247756	-2.4571
Rbfox2	0.253485	5.94438	4.93595	0.000173935	0.00280013	0.872208
LOC108350133	0.253442	5.80502	3.52829	0.00299875	0.0171589	-1.91375
Braf	0.253324	6.51653	5.25539	9.36262e-05	0.00194762	1.45285
LOC100360380	0.253221	4.93783	4.84282	0.000208835	0.00313033	0.779247
Mtmr2	0.252976	6.91019	3.93442	0.0013006	0.00993785	-1.17133
Arhgap27	0.252936	4.77626	3.50597	0.00313997	0.0177754	-1.82664
Gng7	0.252803	4.45199	3.54726	0.00288373	0.0167728	-1.69574
Slc17a6	0.252709	8.16728	2.93345	0.0108608	0.0416458	-3.23282
Tspan2	0.252595	8.28969	3.15044	0.00690655	0.0303037	-2.80237
Phf14	0.252561	6.76254	5.85543	3.03057e-05	0.00108134	2.56632
Utp18	0.25252	4.62606	3.76315	0.00184862	0.012568	-1.29595
Cttnbp2	0.252409	6.29552	6.80743	5.59666e-06	0.000521822	4.25503
Camta1	0.25232	8.69316	4.97925	0.000159812	0.00267161	0.893068
LOC102551038	0.252093	3.17827	2.88565	0.0112234	0.0425571	-2.76125
Lamp5	0.251966	6.84784	3.54313	0.00295909	0.0170284	-1.97087
Nceh1	0.25179	6.2664	4.0743	0.000977062	0.00821745	-0.856291
Dmxl2	0.251772	8.07148	4.75656	0.000247602	0.00345364	0.455923
Zmat1	0.251656	5.12298	5.23705	9.69827e-05	0.00198062	1.51158
Csmd1	0.25148	4.98607	3.51936	0.00305447	0.0174173	-1.83055
Rnmt	0.25126	6.20863	4.59996	0.000337978	0.00417185	0.196243
Hscb	0.251177	3.45794	3.16013	0.00640145	0.0289637	-2.29041
Pcsk2	0.251168	7.05777	3.59393	0.00266192	0.0159718	-1.87458
Sh3glb2	0.251071	7.41552	4.37175	0.000534269	0.00562041	-0.302851
Phka2	0.250797	2.9577	2.9908	0.00905749	0.0367625	-2.54178
Lmln	0.250686	4.83935	4.65015	0.000305814	0.00392323	0.417896
LOC100912031	0.250167	3.81011	3.60729	0.00254809	0.0154883	-1.48489
Srsf11	0.250165	6.66808	4.78111	0.00023587	0.00333153	0.528041
Kcnq3	0.250036	6.02936	3.38682	0.00403716	0.0211286	-2.22295
Pink1	0.249922	7.4091	3.57429	0.00277606	0.0163914	-1.92277
Pan2	0.24972	4.68513	3.67984	0.00219436	0.014041	-1.46912
Trim65	0.249653	4.29943	4.17102	0.00080233	0.0072478	-0.452229
Osbpl6	0.249454	7.03041	4.89901	0.000186996	0.00293497	0.7477
Chkb	0.249317	4.97224	5.05558	0.000137725	0.00247684	1.18167
LOC257650	0.249095	2.93136	2.8905	0.0111133	0.0422728	-2.7211
Mdga2	0.249055	5.2787	3.78362	0.00177242	0.0122458	-1.34248
Atl2	0.248806	5.94326	5.40166	7.08088e-05	0.00169021	1.76139
Atxn7l3	0.248655	7.53488	5.04459	0.000140702	0.00249375	1.02272
Zfp26	0.248529	4.64161	4.08682	0.000952424	0.00805984	-0.659528
Vps50	0.248499	5.17983	4.47484	0.000434161	0.00489612	0.0406802
LOC102553825	0.248406	4.36022	3.41824	0.00376257	0.0200933	-1.93453
Mpped1	0.248347	4.91248	3.25184	0.00530125	0.0254951	-2.34876
Slc36a4	0.248164	6.63456	3.70527	0.00208241	0.0135855	-1.62272
RGD621098	0.247726	4.64011	3.97221	0.00120374	0.00943714	-0.885113
Fam177a1	0.247613	5.82737	3.37352	0.00412587	0.0214563	-2.22575
Fbxo41	0.247504	5.61523	4.19528	0.000763713	0.00701631	-0.557526
Robo2	0.247457	6.7095	3.5415	0.00294339	0.0169817	-1.96248
Peg3	0.247042	10.7737	4.07896	0.000967819	0.00815927	-0.868072
Slit1	0.247006	5.3556	2.80012	0.0136137	0.0487345	-3.30274
Lifr	0.246884	6.36835	2.82608	0.0133073	0.0479183	-3.38098
Arhgap44	0.246723	7.85763	4.71378	0.0002695	0.00364093	0.37258
Herc1	0.246652	8.26456	5.78087	3.47744e-05	0.00115791	2.41324
Aen	0.246344	3.63402	3.16465	0.00634237	0.0287629	-2.30771
Ncoa7	0.246205	7.03832	3.60428	0.00257705	0.0155917	-1.84558
Epg5	0.24619	6.42842	6.18202	1.67405e-05	0.000833627	3.16654
Rbm5	0.246069	7.16162	4.76382	0.000244068	0.00341347	0.47987
LOC108352127	0.246016	4.65395	4.35419	0.00055354	0.00574595	-0.137006
Hmgcll1	0.245774	5.08604	4.1477	0.00084131	0.00747448	-0.59426
Dennd6a	0.245727	5.64994	3.65003	0.00233328	0.0146546	-1.65309
Stxbp1	0.245441	10.0407	4.5163	0.000399518	0.00465853	-0.00458801
Fgfr3	0.245428	7.69759	4.06376	0.000998308	0.00830744	-0.925444
RGD1561444	0.245409	3.80748	3.42605	0.00370247	0.0198624	-1.83386
Rbms1	0.245335	5.16413	3.22837	0.00556349	0.0263089	-2.43193
Atp6v1g2	0.245196	8.44367	4.26285	0.000665869	0.00648654	-0.527025
Trim2	0.244612	8.23454	4.34376	0.00056532	0.00582577	-0.364966
Epb41l3	0.244403	8.84668	3.4672	0.00347866	0.0190753	-2.14592
Aak1	0.244236	8.64073	5.08577	0.000129883	0.0023907	1.09953
Crebzf	0.244181	6.22966	4.48677	0.00042389	0.00483951	-0.029327
Zfp57	0.244147	3.73918	3.4983	0.00319	0.0179741	-1.68532
Rev3l	0.243875	6.37573	5.81576	3.26037e-05	0.00112988	2.50712
Slc37a4	0.243788	4.58852	3.84829	0.00155192	0.0112128	-1.12257
Ebf3	0.243781	5.64329	3.22758	0.00557261	0.0263163	-2.49546
Optn	0.243753	7.11618	5.2837	8.86795e-05	0.0018945	1.48886
Serac1	0.243685	5.07567	4.71315	0.000269837	0.00364093	0.51599
Nrg3	0.243619	5.0231	3.31173	0.00468613	0.0234068	-2.24726
Kcnk10	0.243577	3.56787	3.23909	0.00544215	0.0259284	-2.15677
Phf24	0.242864	7.41456	4.094	0.000938562	0.00798112	-0.860887
Uchl5	0.242785	4.93564	4.02725	0.00107558	0.00871142	-0.81469
Cep164	0.242727	4.84718	2.79777	0.0134152	0.0482513	-3.21793
Tro	0.242724	6.28914	5.19472	0.000105212	0.00207766	1.3482
Limk1	0.242408	7.76302	4.41134	0.000493297	0.00535111	-0.227668
Pomt2	0.24234	5.04984	3.9577	0.00124004	0.00961662	-0.96717
Ccdc28a	0.2423	4.7363	3.88942	0.0014263	0.0105458	-1.06165
LOC100363361	0.242254	5.57584	5.466	6.26767e-05	0.0015873	1.9063
Nagk	0.242184	4.76712	3.78851	0.00175469	0.0121654	-1.26572
Iglon5	0.241952	6.31941	3.11998	0.00712991	0.0310748	-2.79061
Lrfn5	0.241832	5.59002	3.37429	0.00411932	0.0214511	-2.19774
Kcnk9	0.241807	6.28921	3.06403	0.00801757	0.0337891	-2.90002
Ccdc174	0.241645	3.76426	3.25183	0.00530135	0.0254951	-2.1617
Elavl4	0.241527	7.01423	5.22137	9.99497e-05	0.00201754	1.37177
Syt3	0.241445	6.38473	3.81611	0.00165794	0.0117087	-1.38448
Trank1	0.241427	6.11995	3.45868	0.00346155	0.0190118	-2.08358
Stk24	0.241078	5.32884	3.51807	0.00306258	0.017425	-1.87913
Usp28	0.240905	4.67324	3.98515	0.00117229	0.00927677	-0.863982
Mdn1	0.240833	6.81585	3.70775	0.00207182	0.0135327	-1.62588
Usp13	0.24047	6.25824	5.0932	0.000128024	0.00237042	1.15518
Ndrg4	0.240397	10.9524	4.11354	0.000901926	0.00779248	-0.795163
Hook2	0.240298	3.76827	3.50728	0.00313151	0.0177596	-1.67204
Pacsin1	0.240254	7.50074	3.86597	0.0014966	0.0109138	-1.32269
RGD1559441	0.240234	5.46388	2.91046	0.0107996	0.0414822	-3.10154
Mblac2	0.240041	3.76256	3.04456	0.00811415	0.0340932	-2.55579
Prkaa1	0.24002	6.06766	3.65819	0.00229442	0.0144627	-1.67811
Rnf144b	0.239989	4.44188	2.97004	0.00944983	0.0378864	-2.81807
Bnip3	0.23996	7.10514	3.76326	0.00184819	0.012568	-1.52278
Adhfe1	0.239933	5.90449	3.0313	0.00850749	0.0352543	-2.92378
Nhs	0.239929	4.23122	3.50243	0.00316298	0.0178654	-1.74962
Seli	0.239889	5.63902	5.52779	5.57762e-05	0.00148996	2.01691
Snap25	0.23985	11.078	3.50599	0.00313985	0.0177754	-2.01735
Pptc7	0.23978	6.72113	5.53477	5.50474e-05	0.00148155	1.9735
Ccser2	0.239629	7.29904	5.17634	0.000109007	0.00213169	1.28011
B3galnt2	0.239176	4.85247	3.30336	0.00476765	0.0237006	-2.23821
Fsd1l	0.238889	5.71314	3.27608	0.00504317	0.0246632	-2.40747
Cep126	0.238847	4.56648	3.52226	0.00303622	0.0173321	-1.76264
LOC689316	0.238615	4.22548	3.01793	0.00856861	0.0354136	-2.68755
Nrsn1	0.238577	7.81967	3.92225	0.00133344	0.0101263	-1.21237
Rbm25	0.238501	6.02361	5.43491	6.64775e-05	0.00163411	1.81883
Cep350	0.238496	6.23092	5.21412	0.000101355	0.0020362	1.38852
Tsc22d2	0.238337	5.76834	4.34006	0.000569566	0.00585028	-0.284037
P3h3	0.238087	6.17553	2.81686	0.0133907	0.0481854	-3.37572
Ankrd34b	0.238082	5.96456	2.96571	0.00974396	0.038709	-3.05908
Mbd5	0.237849	5.63522	5.15943	0.000112625	0.00218336	1.32459
Gale	0.237806	4.10969	3.64334	0.0023657	0.0147639	-1.45645
Pou6f1	0.237608	6.28053	4.38612	0.000519011	0.00553423	-0.232992
LOC108352957	0.237574	4.38967	4.14162	0.000851785	0.0075253	-0.52045
Adra1a	0.237429	5.07393	3.62586	0.00245242	0.0151061	-1.63101
Fgf9	0.237259	4.29586	3.60784	0.00254522	0.0154883	-1.5532
Pak3	0.237126	7.44083	3.42299	0.00377964	0.0201276	-2.22557
Asap2	0.236911	6.85629	4.92909	0.000176288	0.00281948	0.810916
Rock1	0.236597	7.13481	3.2757	0.00517397	0.0250836	-2.52102
Zfp952	0.23614	3.479	3.01565	0.00860878	0.0355236	-2.5646
Zfp136	0.235984	3.77796	2.92457	0.0103683	0.0404305	-2.78453
Pabpn1	0.235461	7.26122	4.02885	0.00107208	0.00869204	-0.989664
Fbxl20	0.235411	6.52247	4.18382	0.000781709	0.0071356	-0.652406
Znrf2	0.235367	4.95593	3.85888	0.00151852	0.0110326	-1.15157
LOC102549404	0.23529	4.70443	2.81295	0.0130089	0.0472442	-3.1646
Map7d2	0.23494	7.1676	4.34791	0.000560599	0.00578713	-0.346179
Krit1	0.234878	5.63928	5.00356	0.000152407	0.00258462	1.02608
Zbtb25	0.234596	5.30474	4.71699	0.000267785	0.00364093	0.501226
Setd1b	0.23458	6.12813	5.60387	4.83476e-05	0.001367	2.12826
Galnt16	0.234348	7.22552	3.4455	0.00357616	0.0194418	-2.17037
Dact2	0.234345	3.81942	2.8759	0.0114483	0.0431385	-2.88313
Sgpl1	0.234293	6.34285	4.27593	0.000648454	0.00636427	-0.457067
Sprtn	0.234153	4.38263	2.88708	0.0111908	0.0424746	-2.96576
LOC108350210	0.233849	3.65355	2.7884	0.0136719	0.0489166	-3.01598
Disp2	0.23363	9.41603	4.01441	0.00110419	0.00885614	-1.01987
Taz	0.233038	4.94391	3.40876	0.00383682	0.0203315	-2.04389
Tbc1d15	0.232749	5.59648	5.26254	9.23507e-05	0.00193342	1.52306
Acd	0.232647	5.14262	3.92188	0.00133445	0.0101263	-1.05001
Alkbh8	0.232601	4.56056	3.84301	0.00156884	0.0113037	-1.12913
Vsig10	0.23259	3.36234	3.07553	0.00761532	0.0326097	-2.43577
Ccdc171	0.232434	4.11415	3.03785	0.00822643	0.0344133	-2.62962
Rapgef6	0.232374	5.31562	3.90904	0.00137005	0.0103035	-1.09646
Naa40	0.232049	3.91551	3.18203	0.00611983	0.0281237	-2.31953
Pde4a	0.231867	5.50364	3.54876	0.00287478	0.016736	-1.83928
LOC102547219	0.231841	4.64132	4.25162	0.000681198	0.00656651	-0.336102
Bclaf1	0.231738	7.45339	5.14018	0.000116891	0.00224111	1.20841
Asns	0.231704	6.02358	5.18168	0.000107889	0.00211299	1.33928
Cd83	0.231603	5.55834	2.79369	0.0137378	0.0490644	-3.34025
Avl9	0.231576	6.72305	4.12667	0.00087811	0.00768447	-0.77689
Trpc1	0.231561	5.27027	3.69632	0.00212114	0.0137523	-1.51594
Pafah1b1	0.231476	9.82379	4.65205	0.000304657	0.00391481	0.261536
LOC100912582	0.231368	3.88634	2.89889	0.0109251	0.0417801	-2.85209
Pdlim7	0.23084	5.49799	3.51791	0.00306361	0.017425	-1.9003
Mrap2	0.230815	5.58895	3.03621	0.00825403	0.0344684	-2.8659
Zc3h12c	0.230642	4.5316	4.43124	0.000473925	0.00522786	0.0265983
Srsf2	0.229743	7.4101	4.61699	0.000326693	0.00408732	0.185682
Gsk3b	0.229588	8.38166	5.84279	3.10192e-05	0.00109929	2.52734
LOC103690082	0.229481	6.91153	3.71705	0.00203255	0.0133885	-1.61056
Stradb	0.229368	4.85999	3.98135	0.00118144	0.00933238	-0.896088
Zmat3	0.229084	7.16184	4.56565	0.000361954	0.00435791	0.0881028
LOC103691267	0.229009	6.25314	3.83435	0.00159697	0.0114276	-1.33846
Slc41a2	0.228754	5.23867	3.07025	0.00769815	0.0328036	-2.75294
Hmbox1	0.228597	7.93756	4.58456	0.00034853	0.00425849	0.116262
Map3k12	0.228348	6.86851	5.8199	3.23556e-05	0.00112661	2.49845
Endod1	0.228223	8.42124	3.55664	0.00282849	0.0166062	-1.95299
Usp49	0.227863	4.15793	3.54585	0.00289211	0.0168	-1.6537
LOC108350662	0.227808	3.47657	3.01429	0.00863273	0.035585	-2.5668
Nfat5	0.227764	7.10489	5.75864	3.62358e-05	0.00117296	2.38092
Pik3cd	0.227448	4.59222	3.46407	0.00342327	0.0188478	-1.88138
Grip2	0.227429	5.77812	3.04411	0.00812158	0.0341063	-2.87283
Slitrk3	0.227274	5.36987	3.66364	0.0022688	0.0143416	-1.59352
Agfg2	0.227119	5.34863	3.7358	0.0019556	0.0130629	-1.44666
Eea1	0.226924	5.97777	4.64874	0.000306673	0.00393104	0.308867
Srpk2	0.226804	7.77571	4.8478	0.000206798	0.00311779	0.63679
Slc4a3	0.226748	7.38562	3.91111	0.00136425	0.0102788	-1.22971
Dync1i1	0.226664	7.32727	3.9422	0.00128002	0.0098488	-1.16587
Ypel4	0.226367	5.77137	4.1849	0.000779992	0.0071324	-0.593542
Atg13	0.226352	6.60646	4.76422	0.000243875	0.00341347	0.497449
Tspyl4	0.225785	8.07933	4.16742	0.000808216	0.0072812	-0.719024
Nufip2	0.22569	7.0551	3.23782	0.00552055	0.0261804	-2.58608
Cchcr1	0.225628	4.04252	3.271	0.00509615	0.0248525	-2.1693
Entpd4	0.225457	6.70933	5.3262	8.1756e-05	0.0018381	1.58016
Smarcal1	0.225351	4.2207	3.0527	0.00797999	0.0337105	-2.62018
Zzef1	0.225184	6.78205	6.14155	1.80038e-05	0.000851231	3.08369
Fam204a	0.225168	4.684	3.92452	0.00132724	0.0100971	-0.985226
B3galt1	0.225039	5.10836	3.05409	0.0079573	0.0336419	-2.76572
Rab3gap2	0.225034	6.96031	5.29828	8.62392e-05	0.0018718	1.5199
Mmp16	0.224837	5.61072	4.99812	0.000154031	0.00259952	1.01789
Tet2	0.224716	5.44252	4.17991	0.000787948	0.00716096	-0.570475
Atp6v1h	0.22466	7.33318	3.99718	0.00114379	0.0091177	-1.05495
Vps54	0.224507	5.16415	3.00947	0.00871816	0.035824	-2.86084
Dgcr8	0.224494	5.3527	3.80928	0.00168138	0.0118157	-1.30023
Ttll7	0.224455	9.12345	3.14375	0.00676498	0.0299425	-2.78899
Nanp	0.224427	3.40774	3.28684	0.0049326	0.0242815	-2.04494
Slc6a8	0.224413	7.77156	3.74822	0.00190628	0.0128375	-1.56393
Camk2b	0.2241	8.62589	4.6597	0.000300058	0.00387159	0.265385
Ppp1r16b	0.224019	8.21149	2.80619	0.0137383	0.0490644	-3.46537
Kcnma1	0.223819	5.63354	3.43855	0.00360823	0.0195433	-2.0747
Mthfd1l	0.223725	4.90843	3.02998	0.00835987	0.0348269	-2.78196
Utp15	0.223682	4.91825	3.13058	0.00680199	0.0300184	-2.58756
Gnal	0.22361	7.06592	3.66834	0.00224695	0.0142437	-1.7136
Cacnb4	0.223532	7.17603	4.83583	0.000211732	0.00315104	0.620945
Usp33	0.223511	7.44717	5.46536	6.27525e-05	0.0015873	1.8287
Tmem245	0.223459	7.49289	4.40575	0.00049888	0.00539672	-0.235979
LOC102554315	0.223458	4.13247	3.36031	0.00423978	0.0218317	-2.01096
Rnd1	0.2234	4.84694	3.34903	0.00433952	0.0221848	-2.1475
Acss1	0.223366	5.31271	4.14689	0.000842692	0.00747448	-0.622006
Cygb	0.223347	6.95016	4.62374	0.000322328	0.00405212	0.208261
Smyd2	0.22316	6.38456	3.46542	0.00341375	0.0188153	-2.0909
Vwa1	0.223005	5.03124	2.87641	0.0114363	0.0431037	-3.0979
Dot1l	0.222892	6.15016	3.13624	0.00672347	0.0298094	-2.72898
Tarbp1	0.222865	3.53225	2.7814	0.0138668	0.0494221	-3.00758
Rora	0.222833	5.43934	2.78278	0.0138724	0.0494306	-3.33863
Herc3	0.222566	7.48027	4.6404	0.000311804	0.00396856	0.231095
Ppargc1a	0.22255	6.72929	2.85809	0.0122125	0.0451916	-3.33026
Gpld1	0.222315	6.84352	4.40795	0.00049667	0.00537653	-0.217553
Tnrc6a	0.222107	7.22	5.44982	6.46254e-05	0.00161193	1.8024
Reps1	0.222093	4.90568	4.21899	0.000727808	0.00683487	-0.432082
Cntnap1	0.222032	8.42186	4.39263	0.000512241	0.00549912	-0.266909
Cdc37l1	0.221852	6.84521	4.40252	0.000502133	0.00542442	-0.228452
Bmpr2	0.221818	8.13202	5.38932	7.24897e-05	0.00171166	1.68035
Cdh8	0.221583	4.68567	2.83267	0.012499	0.0459479	-3.12395
Msl3	0.221432	5.01044	3.70805	0.00207054	0.0135327	-1.45898
Arfip2	0.221286	6.2101	5.38718	7.27847e-05	0.00171186	1.71815
Rpgrip1l	0.221213	5.9134	3.22404	0.00561329	0.0264303	-2.53237
Senp7	0.221039	5.12988	4.14648	0.000843402	0.00747654	-0.601995
Ets2	0.220899	4.90089	3.43074	0.00366678	0.0197241	-1.9942
Kcnb2	0.220885	3.50661	2.80608	0.0131913	0.0476501	-2.95786
U2surp	0.22077	6.78017	5.04388	0.000140894	0.00249375	1.03617
Crlf3	0.22074	3.7804	2.93763	0.010096	0.0396846	-2.76055
Mfsd12	0.220694	6.4215	4.66279	0.000298221	0.00385741	0.30696
Chic1	0.220681	6.55196	4.11472	0.000899761	0.00777807	-0.792918
Styx	0.220675	4.25714	3.55824	0.00281917	0.016564	-1.64458
Gltscr2	0.220642	6.05923	3.16559	0.00633005	0.0287404	-2.66256
Slitrk2	0.220571	5.11707	3.98843	0.00116445	0.0092354	-0.914443
Golga3	0.220356	6.05573	3.75952	0.00186248	0.0126348	-1.47325
Crim1	0.220341	6.50869	3.82454	0.00162947	0.0115808	-1.37531
Plekhg5	0.220295	4.25686	3.07291	0.00765625	0.0327324	-2.58778
Uimc1	0.219993	4.96971	3.184	0.00609502	0.0280307	-2.49084
Mtcl1	0.219871	5.48766	3.54034	0.00292516	0.0169202	-1.85432
Fbxl2	0.219844	4.86262	2.93216	0.0102091	0.0399787	-2.96367
Car11	0.219759	6.06299	3.37762	0.0040912	0.0213473	-2.24088
Slitrk1	0.219676	5.86909	2.93862	0.0100952	0.0396846	-3.09018
Lrrtm2	0.219526	5.32159	3.1131	0.00705053	0.0307982	-2.68059
Mapkbp1	0.21914	5.39341	3.55336	0.00284768	0.0166701	-1.81687
Arhgef9	0.219089	7.28098	4.60884	0.000332047	0.00412792	0.171536
Trove2	0.218918	5.27584	4.7446	0.000253528	0.00351516	0.55754
Mau2	0.218853	6.68279	4.23781	0.000700543	0.00667142	-0.551965
Gk	0.21868	4.87098	3.80513	0.00169578	0.0118902	-1.24715
Zfp90	0.218368	3.63512	3.20686	0.00581516	0.0271825	-2.2279
Lonrf1	0.218333	3.73293	2.93464	0.0101578	0.0398475	-2.75791
Efr3b	0.218185	8.04391	3.45502	0.00348777	0.0190956	-2.15773
Rsbn1	0.218173	5.33194	4.01447	0.00110406	0.00885614	-0.88795
Pik3cb	0.218116	4.77947	3.325	0.00455976	0.0229364	-2.18453
Fam189a1	0.218109	3.81415	3.01021	0.00870505	0.035789	-2.62964
RGD1565685	0.218071	4.47449	4.37652	0.000529147	0.0055966	-0.0732811
Dhx57	0.217966	6.29894	4.05325	0.00101994	0.00841749	-0.900998
Aptx	0.217963	3.92794	3.10581	0.00715678	0.0311557	-2.46748
Golga7b	0.217801	4.68939	2.78762	0.0136935	0.0489603	-3.21012
Tbc1d32	0.217629	3.88452	3.06692	0.00775076	0.0329734	-2.53414
Rbbp6	0.217511	6.33856	4.74129	0.0002552	0.00351888	0.466196
Dok5	0.217206	4.65207	3.58101	0.00268988	0.0160512	-1.65992
Cers6	0.217174	3.99478	2.79246	0.0135602	0.0485999	-3.07155
Cit	0.216989	7.00421	3.97371	0.00120005	0.0094329	-1.09495
Mios	0.216973	4.07424	2.88418	0.0112571	0.0426333	-2.91435
Deaf1	0.21672	5.32596	3.39885	0.00391596	0.0206809	-2.11633
Ulk1	0.216674	6.67987	5.106	0.000124887	0.00232023	1.15961
Sgip1	0.216668	7.71292	5.04251	0.000141272	0.00249481	1.01696
Vps13d	0.216658	7.51192	5.55565	5.29266e-05	0.00143682	1.99783
Lig4	0.216654	5.4627	2.78063	0.0138886	0.0494546	-3.34417
Dgkz	0.216559	7.4323	3.68706	0.002162	0.0139386	-1.68342
Mycbp2_1	0.216385	8.39284	5.89285	2.82925e-05	0.00104952	2.61912
Dennd4c	0.216243	5.53609	2.83184	0.0125199	0.0459925	-3.25571
Ank3	0.216241	8.68144	3.67857	0.00220012	0.0140492	-1.7055
Enpp5	0.215831	8.27282	4.30783	0.000607903	0.00611676	-0.437038
Extl2	0.215227	6.22908	3.54085	0.00292207	0.0169085	-1.92773
Tubg2	0.215079	4.85057	3.73009	0.00197872	0.0131278	-1.39333
Ssx2ip	0.215032	5.37315	4.14922	0.000838712	0.0074603	-0.624053
Spag9	0.214982	9.26723	4.81246	0.000221713	0.00322342	0.571156
Shc2	0.214972	5.11401	2.83152	0.0125281	0.0459987	-3.19674
Mid2	0.214747	5.60961	4.12638	0.000878632	0.00768447	-0.694599
Ttc1	0.214693	6.13499	3.53292	0.00297025	0.01708	-1.93598
Plekha6	0.214628	7.8348	4.65443	0.00030322	0.0039013	0.255403
Slc45a1	0.214605	6.31456	3.38457	0.00403296	0.0211208	-2.24798
Atp6v1a	0.214522	9.10276	4.37347	0.000532416	0.00561487	-0.301081
Syne1	0.214428	8.40211	3.64733	0.00234632	0.014707	-1.76989
Lrig2	0.214376	5.79921	3.96156	0.00123026	0.00956369	-1.04346
Rfx7	0.214376	5.78796	3.68258	0.002182	0.0140077	-1.60261
Kif3a	0.214344	7.79301	4.36793	0.000538399	0.00565159	-0.314766
Hinfp	0.214312	4.18451	3.42817	0.0036863	0.0198155	-1.88733
Asxl1	0.214301	5.7453	4.38256	0.000522743	0.00555512	-0.197652
Acbd4	0.214274	5.08653	3.36704	0.00418137	0.0216019	-2.14712
Chm	0.214248	4.94177	3.82008	0.00164448	0.0116452	-1.22699
Zfp639	0.214232	4.28329	3.39647	0.00393528	0.020762	-1.9649
Usp6nl	0.214167	6.38351	3.56033	0.00280708	0.0165178	-1.90005
Frmd5	0.21415	6.5601	3.40652	0.00385458	0.0203911	-2.22043
Csmd2	0.214149	6.00461	3.88555	0.00143765	0.0105962	-1.21522
Jmy	0.213956	6.26422	5.41673	6.88111e-05	0.00166869	1.77089
Sp4	0.213833	3.94496	3.70603	0.00207915	0.0135699	-1.31193
Zcchc9	0.213605	5.09315	2.97735	0.00930982	0.0374597	-2.91271
Fam135a	0.213519	5.64997	3.94706	0.00126734	0.0097831	-1.05754
Akap6	0.213444	8.14923	3.83318	0.00160082	0.0114499	-1.39418
Grk3	0.213232	6.03816	4.17839	0.000790389	0.00716888	-0.630128
Mpp3	0.213102	6.04507	3.93538	0.00129804	0.00993766	-1.11848
Map1b	0.21294	11.5803	3.17633	0.00619198	0.0283794	-2.66539
Parn	0.212694	4.48118	3.72936	0.00198169	0.0131419	-1.34199
Rasgef1a	0.212354	5.21146	4.17675	0.000793028	0.00718206	-0.551356
Ggt7	0.21222	7.11175	3.83906	0.0015816	0.0113538	-1.3698
Lrrc8b	0.211962	5.58656	3.38178	0.00405629	0.0212075	-2.18258
LOC103690089	0.211564	5.90626	4.8221	0.000217538	0.0031846	0.653698
Ggps1	0.211496	5.54522	4.24451	0.00069108	0.00661826	-0.45261
Sptbn4	0.211	7.56809	3.30021	0.00479868	0.0238019	-2.46436
Cdkl1	0.210975	4.95714	3.29063	0.00489425	0.0241585	-2.27934
Rc3h1	0.210792	6.57227	4.43625	0.000469171	0.00518684	-0.150064
Kif21a	0.210655	8.47932	4.12927	0.000873469	0.00766929	-0.795706
Wdr37	0.210588	6.29733	4.02343	0.00108401	0.00876155	-0.960905
Zbtb44	0.210491	5.35896	3.52853	0.00299724	0.0171589	-1.8622
Rasgrp2	0.210469	4.94649	3.31275	0.00467627	0.0233748	-2.23415
Brwd1	0.210455	6.14696	3.67206	0.00222979	0.0141897	-1.65712
Gabra5	0.21031	5.06257	2.84358	0.0122252	0.0452065	-3.16579
Tra2a	0.21025	6.85618	2.81134	0.0133053	0.0479183	-3.42097
E4f1	0.21014	4.53257	3.09207	0.00736127	0.0317846	-2.59909
Zfpm2	0.210091	4.02011	3.94348	0.00127667	0.00983656	-0.860983
Apba1	0.210051	7.02203	3.73434	0.0019615	0.01308	-1.57907
Proser1	0.209914	4.5609	3.37935	0.00407664	0.0212855	-2.04315
Farp2	0.209546	4.76677	3.43928	0.00360285	0.0195277	-1.95732
Flcn	0.209432	6.15344	3.50007	0.00317842	0.0179176	-2.00353
Atg4c	0.209422	5.43294	3.50631	0.00313774	0.0177754	-1.91576
Zfyve28	0.209212	4.95429	2.84117	0.0122853	0.0453753	-3.15323
Uhrf1bp1l	0.209197	6.07906	4.67558	0.000290729	0.00380449	0.354067
Narf	0.208948	5.83453	4.97452	0.000161295	0.00267641	0.954755
Pus10	0.208817	4.28914	3.13086	0.00679812	0.0300129	-2.48187
Prpf4b	0.208473	6.88766	3.63107	0.00242622	0.0149682	-1.78339
Luc7l2	0.207828	7.64735	4.88879	0.000190789	0.00297661	0.718126
Rundc3b	0.207774	5.44846	3.38432	0.0040351	0.0211249	-2.16088
Chd5	0.207757	8.43929	3.69793	0.00211411	0.0137295	-1.66749
Nae1	0.207503	5.15489	3.74979	0.00190011	0.0128069	-1.39481
Gtf2f1	0.207277	6.2622	3.41837	0.00376156	0.0200933	-2.17629
Ikbkap	0.207255	6.51956	4.25622	0.000674869	0.0065375	-0.507135
LOC680142	0.207243	4.72569	2.9342	0.0101668	0.0398529	-2.93692
LOC102548389	0.2072	5.04092	3.63544	0.00240448	0.0148868	-1.6077
Tepsin	0.207086	4.44363	3.93798	0.00129115	0.00990429	-0.926345
Dhx36	0.206905	6.77401	5.34153	7.93989e-05	0.00181525	1.60714
Dbn1	0.206894	7.02666	5.075	0.000132627	0.00241848	1.08968
Lmbr1	0.206859	5.01884	3.49197	0.00323193	0.0181062	-1.88991
Pcf11	0.206798	5.4921	4.15954	0.000821276	0.00735615	-0.616334
Zrsr1	0.206529	5.7109	3.88493	0.00143949	0.0106009	-1.18851
Kmt2e	0.206407	7.24192	4.80487	0.000225056	0.00325141	0.558982
Anks1b	0.206385	7.19192	2.83024	0.0128051	0.0467442	-3.39512
Rrnad1	0.206354	4.09968	3.371	0.00414736	0.021487	-1.98509
Elac1	0.206344	4.51864	4.17663	0.000793218	0.00718206	-0.46806
Atxn2l	0.206239	7.39817	3.32686	0.00454234	0.0228855	-2.4084
Ift88	0.206219	4.95072	3.17839	0.00616582	0.0282981	-2.4991
Atp6v1e1	0.206074	8.15112	4.34828	0.000560178	0.00578713	-0.355879
Gtpbp3	0.206023	4.23334	3.38993	0.00398869	0.020952	-1.96969
Mapk10	0.205774	8.39113	3.35885	0.00425257	0.021876	-2.35127
Ppm1l	0.205701	6.92137	4.10206	0.000923278	0.00790717	-0.833742
Kif5c	0.205641	9.28823	3.80208	0.00170645	0.0119436	-1.45044
Usp36	0.205605	5.12569	3.29868	0.00481379	0.0238618	-2.28796
Synj1	0.205574	8.61819	4.02117	0.00108902	0.00877945	-1.01319
Lzts3	0.20536	6.49746	4.07568	0.000974305	0.00820512	-0.868497
Mllt11	0.205358	7.91283	3.41629	0.00377768	0.0201271	-2.23495
Siah1	0.205252	4.65118	3.02863	0.00838307	0.0348864	-2.74224
Add2	0.204834	7.85656	4.04274	0.00104208	0.00854615	-0.969282
Jakmip2	0.204741	5.31781	3.1253	0.00687621	0.0302087	-2.65621
Slc9a3r2	0.20472	5.96613	3.26739	0.0051342	0.0249603	-2.45165
Ipo11	0.204606	5.57189	4.07051	0.000984633	0.00825216	-0.802349
Tdp2	0.204471	4.79602	2.89399	0.0110346	0.0420347	-3.02604
Cadm3	0.20443	8.49805	3.36713	0.00418062	0.0216019	-2.33429
Ubxn2a	0.204424	6.40492	3.1057	0.00715841	0.0311557	-2.80987
Mycbp2	0.204152	4.44207	3.15787	0.00643133	0.0290402	-2.45604
Pus1	0.20406	3.91183	3.14544	0.00659768	0.029519	-2.38913
Cdk5	0.20395	6.05582	5.00493	0.000152002	0.00258462	0.997591
Zfp207	0.20372	7.11543	5.47649	6.1446e-05	0.00157315	1.85443
Rapgefl1	0.20363	6.41954	3.61025	0.00253258	0.015448	-1.80201
Lmtk2	0.203517	7.33363	4.8814	0.000193575	0.00300809	0.707471
Edem3	0.203387	6.75808	3.76032	0.00185942	0.0126196	-1.5175
Rb1cc1	0.203309	7.0033	4.97861	0.000160012	0.00267209	0.903333
Alg11	0.203044	6.89882	3.86303	0.00150566	0.0109644	-1.31531
Morc3	0.202998	5.25433	4.49951	0.0004132	0.00476961	0.0811759
Atp6v1c1	0.202757	7.73938	3.75832	0.00186706	0.0126441	-1.54319
RGD1310081_1	0.202635	4.59762	2.91299	0.010616	0.0409981	-2.95537
Eif4b	0.202631	7.65155	4.16378	0.000814233	0.00731735	-0.723418
Oxr1	0.202582	8.38011	3.33434	0.00447286	0.0226448	-2.40046
Atm	0.202364	5.4524	4.2656	0.00066216	0.00645833	-0.401241
Kcnab2	0.202346	8.96864	3.27262	0.00507919	0.0248006	-2.52041
Tomm70	0.201485	6.49009	3.39406	0.00395488	0.0208301	-2.24124
Xiap	0.201473	6.42385	4.28866	0.000631943	0.006269	-0.436771
Nat8l	0.201294	8.92902	2.90958	0.0107958	0.0414779	-3.24425
Ptprg	0.201146	6.07285	4.16681	0.000809224	0.0072812	-0.656189
Clk3	0.201107	5.85199	3.90916	0.00136971	0.0103035	-1.15382
Mfsd11	0.200588	5.14848	4.27654	0.000647651	0.00636038	-0.346721
Ublcp1	0.200478	6.80371	4.31534	0.000598744	0.00604299	-0.401428
Znf740	0.200236	6.42746	3.30434	0.00475799	0.0236675	-2.41667
Tmx4	0.200224	8.76284	2.96585	0.00957277	0.0382618	-3.13252
Zfp347	0.200019	4.14378	3.41127	0.00381698	0.0202538	-1.91388
Ccdc149	0.199807	5.81393	3.3229	0.00457953	0.0229989	-2.32551
Fam13b	0.19972	7.57543	4.56168	0.000364833	0.00438248	0.0737933
H6pd	0.199387	4.60846	3.13865	0.00669025	0.0297395	-2.5217
Runx1t1	0.199272	4.31079	2.91072	0.010665	0.0411571	-2.90788
Zfp445	0.199034	6.21494	4.55697	0.00036829	0.00441135	0.110589
LOC102552000	0.19895	4.25147	3.77698	0.0017968	0.0123335	-1.21572
Kifap3	0.198924	8.31575	4.09973	0.000927678	0.00793618	-0.855676
Prkar1b	0.198838	8.77769	2.86041	0.0119328	0.0444359	-3.34116
Grin1	0.198591	8.43694	3.85398	0.00153389	0.0111236	-1.3519
Atp1b1	0.198445	11.1044	3.48617	0.00327083	0.0182718	-2.05667
Fah	0.197869	5.18152	2.93403	0.0101702	0.0398566	-3.0098
Kras	0.197613	6.90157	3.33624	0.00445541	0.0225783	-2.37712
Ggnbp2	0.197166	6.52842	3.91387	0.00135655	0.0102355	-1.19632
Cacna1a	0.197009	7.30174	4.19829	0.000759053	0.00699	-0.649095
Sdccag3	0.19681	5.60282	3.42564	0.00370557	0.0198645	-2.09708
Pan3	0.19678	5.78205	4.28363	0.000638417	0.00631323	-0.397752
Rnf123	0.196764	7.16256	4.36591	0.000540598	0.00566795	-0.310126
MAST1	0.196755	7.24908	3.17381	0.00622413	0.0284906	-2.71104
Atg12	0.196675	5.93903	2.9131	0.0106134	0.0409981	-3.14623
Zwint	0.196624	11.3128	3.61263	0.00252021	0.0154085	-1.7977
Kif1b	0.196569	9.59815	4.12844	0.000874951	0.0076737	-0.787636
Wnk3	0.196523	5.81011	3.77913	0.00178888	0.0123007	-1.41101
Ago3	0.196432	6.15399	4.29497	0.00062393	0.00622044	-0.406089
Npat	0.196388	5.182	3.41793	0.00376492	0.0200933	-2.05949
Trafd1	0.196328	5.94543	3.58116	0.00268909	0.0160512	-1.82203
Klhdc2	0.196324	7.08512	4.3256	0.000586449	0.0059689	-0.389105
Tubgcp6	0.196322	5.46949	3.52952	0.00299112	0.0171477	-1.87389
Iqsec3	0.196276	8.80234	3.28954	0.00490529	0.0241852	-2.48798
Mecp2	0.19595	7.39528	4.84002	0.000209992	0.00314166	0.62552
Syt1	0.195923	8.46459	2.96763	0.00949633	0.0380145	-3.12818
Mon2	0.195827	6.79415	4.47575	0.000433374	0.00489098	-0.0807707
RGD1307235	0.195497	6.36176	4.2444	0.000691233	0.00661826	-0.521567
Orc3	0.195403	5.54748	3.82374	0.00163214	0.0115892	-1.29377
Ppp3cb	0.195345	7.45613	4.12163	0.000887183	0.00772411	-0.805911
Nars	0.195212	7.98223	3.92245	0.0013329	0.0101263	-1.2131
Rufy3	0.195011	8.50568	4.41366	0.000490996	0.00533759	-0.224605
Nr1d2	0.194879	6.89372	2.90647	0.0107579	0.0413626	-3.22735
Asb1	0.194849	6.28371	3.14321	0.00662786	0.0295823	-2.72653
Arid4a	0.194836	5.32751	3.9705	0.00120797	0.00944821	-0.975286
Chrnb2	0.194806	5.39225	2.99212	0.00903298	0.0367183	-2.92676
Isca1	0.194664	7.40354	4.23694	0.000701784	0.00667441	-0.573102
Tmem87b	0.194662	6.15517	4.73538	0.000258202	0.00354779	0.466134
Hexdc	0.194608	4.201	2.85062	0.0120518	0.0447812	-3.00141
Pde3b	0.194532	4.43482	3.23238	0.00551786	0.0261756	-2.31004
Ofd1	0.194397	3.93126	2.86075	0.0118063	0.0440843	-2.93213
Uri1	0.194346	5.17188	4.35943	0.000547717	0.00570821	-0.185711
Gpr158	0.194245	7.55629	3.10747	0.00713246	0.0310773	-2.84811
LOC682206	0.194219	4.79654	3.37388	0.00412284	0.0214549	-2.09102
Sema4g	0.194135	5.49543	2.91936	0.0104789	0.0406896	-3.08174
Edrf1	0.19407	4.88687	3.14454	0.00660979	0.0295504	-2.55555
B4galnt4	0.193999	5.62989	3.6457	0.00235419	0.0147234	-1.65985
Dis3	0.193861	4.41748	3.55421	0.00284267	0.0166583	-1.67719
Dscam	0.193827	5.66891	2.85387	0.0119724	0.0445558	-3.23022
Syt14	0.193745	5.29091	3.83085	0.00160849	0.011489	-1.24989
Pou2f1	0.193557	4.39825	3.26899	0.00511729	0.0249013	-2.23259
L3mbtl2	0.19354	5.99323	4.19829	0.000759065	0.00699	-0.586677
Slc4a1ap	0.193535	5.72885	3.4748	0.00334841	0.0185728	-2.0131
Gramd1a	0.193455	6.24762	4.47573	0.000433394	0.00489098	-0.0526641
Meis3	0.193329	4.93176	3.69195	0.00214034	0.0138317	-1.48048
Jade1	0.193268	5.34315	2.96025	0.00964065	0.0384155	-2.98202
Vezt	0.193212	5.55688	2.98209	0.00922001	0.0371839	-2.96775
Rpap3	0.193054	6.0546	5.06702	0.000134698	0.00244002	1.11732
Ric1	0.193052	5.86867	4.93664	0.0001737	0.00280013	0.878902
Csnk1g3	0.192882	6.20795	4.20048	0.000755694	0.00697846	-0.599077
Gpr155	0.19284	5.36642	3.34339	0.00439019	0.0223781	-2.23188
Gltscr1l	0.192659	5.76913	3.21962	0.0056646	0.0266105	-2.52594
Zfp335	0.192382	5.86957	2.98505	0.00916446	0.0370371	-2.99871
Mta3	0.192238	7.09764	3.99994	0.00113734	0.00907553	-1.04451
Elk1	0.192177	5.08464	4.10602	0.000915851	0.00788287	-0.677061
Prosc	0.192121	5.51063	3.16443	0.0063452	0.0287674	-2.60447
Hps4	0.192109	5.55795	3.23927	0.00544014	0.0259284	-2.46239
LOC102546572	0.19207	6.64111	4.32701	0.000584781	0.00595967	-0.371489
Rapgef3	0.19198	6.74574	3.91852	0.00134367	0.0101678	-1.19757
Smg6_1	0.19189	4.78446	3.14492	0.00660462	0.0295416	-2.53854
Ccdc136	0.191842	7.13663	4.18307	0.000782904	0.00714235	-0.676401
Bbs2	0.191738	5.7079	4.2221	0.000723239	0.00680768	-0.513458
Lsamp	0.191694	9.09456	3.61702	0.00249753	0.0153177	-1.82654
Atf2	0.191305	6.07368	4.04737	0.00103227	0.00850132	-0.895891
Lrrfip1	0.191065	5.48111	3.61363	0.00251501	0.0153887	-1.70711
Dut	0.191028	4.87359	3.20003	0.00589741	0.0273953	-2.44486
Gpr161	0.19094	5.02897	2.7916	0.0135837	0.0486565	-3.25985
Ubr3	0.19084	7.62647	3.78942	0.0017514	0.0121536	-1.47911
Arhgef11	0.190811	7.70624	4.02252	0.00108603	0.00876431	-1.00881
Zfp180	0.190668	6.55712	2.98181	0.00922537	0.0371959	-3.06382
Carmil2	0.190599	6.1334	2.87881	0.0113806	0.0429453	-3.23189
Ino80	0.190364	5.39141	4.09029	0.000945696	0.0080159	-0.743564
Ddx25	0.190358	5.3727	3.73049	0.00197708	0.0131224	-1.46037
Dnajc5	0.190301	8.53833	4.6907	0.00028213	0.00373666	0.326288
Susd4	0.190291	6.72976	3.95063	0.00125813	0.00973199	-1.13211
Dzip3	0.190104	6.70417	3.17287	0.00623607	0.0285119	-2.69482
Cdkn2aipnl	0.190036	5.3331	3.59975	0.00258798	0.0156458	-1.71688
Ccdc88a	0.190028	7.48545	4.56105	0.000365292	0.00438462	0.0736146
Alg12	0.189969	3.94453	2.97032	0.00944442	0.0378744	-2.72812
Nptn	0.189739	8.71807	3.79419	0.00173434	0.012101	-1.47147
Bin1	0.18973	8.56054	3.2528	0.00529074	0.0254684	-2.56298
Napg	0.189569	7.20929	3.69412	0.00213076	0.0137976	-1.66501
Ints2	0.189231	4.50134	3.77235	0.00181399	0.0124297	-1.26035
Vldlr	0.189175	6.86077	3.63646	0.00239947	0.0148676	-1.77165
Htt	0.189169	7.52506	5.41039	6.96437e-05	0.00168349	1.72392
Gpatch11	0.189127	5.24239	3.21711	0.00569391	0.0267194	-2.46534
Whsc1	0.189117	6.9831	4.90944	0.000183209	0.00289002	0.769055
Zranb1	0.189002	5.43731	3.68121	0.00218819	0.0140245	-1.56669
Unc5c	0.188938	5.80208	3.06355	0.00780457	0.0331123	-2.83759
Mysm1	0.188887	5.7337	3.62945	0.00243437	0.0150067	-1.70376
Klhl8	0.188868	5.68932	3.24013	0.00543051	0.0259182	-2.4763
Mnt	0.188534	5.4406	3.59009	0.00264005	0.0159053	-1.74937
Sec16a	0.188348	7.08631	3.90592	0.00137885	0.0103489	-1.23411
Nrxn3	0.188258	7.75639	4.33215	0.000578741	0.00592123	-0.386156
Srrm3	0.188087	5.96737	3.23955	0.00543702	0.0259284	-2.5072
Jph3	0.18788	7.53613	3.67921	0.00219722	0.0140478	-1.70083
Ssh1	0.187764	4.50042	2.90826	0.0107187	0.0412525	-2.94718
Ddx3	0.187669	6.80304	5.15062	0.000114557	0.00221533	1.24131
Ncoa2	0.187355	6.56998	3.55477	0.00283943	0.0166517	-1.92306
Pi4ka	0.18731	8.13853	3.48438	0.00328289	0.0183066	-2.09892
Gmps	0.187243	5.29187	3.34583	0.00436821	0.0222943	-2.21735
LOC688613	0.187157	4.99089	3.12004	0.00695075	0.0304429	-2.61959
Etl4	0.187072	7.08341	3.25264	0.00529246	0.0254688	-2.54994
Rhbdl1	0.186845	5.32678	2.84361	0.0122244	0.0452065	-3.20494
Brsk1	0.186645	8.40608	3.78996	0.00174947	0.012147	-1.48148
Kdm4b	0.186229	6.25502	3.67049	0.002237	0.0142094	-1.66894
Fbxo10	0.186207	6.28823	3.05095	0.00800869	0.0337862	-2.90904
Nmnat2	0.18619	5.96035	3.24631	0.00536185	0.0256766	-2.49308
Cds2	0.185407	6.81326	3.22118	0.00564642	0.0265522	-2.60362
Med13l	0.185366	6.19819	3.76746	0.00183231	0.0125133	-1.4692
Taf9	0.185346	5.2636	2.89471	0.0110185	0.0420058	-3.09769
Kbtbd3	0.185334	4.98064	2.79942	0.0133702	0.048123	-3.23731
Dpp6	0.184975	8.86504	3.2659	0.00514994	0.0250013	-2.53475
Zmym5	0.184859	5.46545	3.40165	0.00389342	0.0205897	-2.12856
Lrrc4c	0.184742	6.12058	2.93917	0.0100642	0.0396195	-3.11344
Ube2o	0.184622	8.03938	3.45114	0.00351578	0.0192086	-2.16555
Tnpo1	0.184257	7.18719	3.64644	0.00235062	0.0147222	-1.76086
Calm1	0.184127	10.1399	4.12112	0.000888095	0.00772411	-0.79426
Ppm1m	0.18405	3.89386	2.84501	0.0121897	0.0451324	-2.95477
Iqcb1	0.183866	5.12286	4.03163	0.00106599	0.00867414	-0.829423
Zbtb11	0.183807	5.89779	3.00517	0.0087952	0.0360553	-2.96247
Epm2aip1	0.183692	8.69844	3.89379	0.00141357	0.0105089	-1.27017
Hars	0.183676	6.68852	4.20823	0.000743884	0.00692346	-0.611667
Zfp560	0.183452	3.89042	2.83659	0.0123999	0.0456481	-2.9699
Ap1ar	0.183364	5.7991	3.144	0.00661722	0.0295594	-2.67888
Fam160b2	0.183129	5.6947	3.16636	0.00632007	0.0287404	-2.62293
Pithd1	0.183025	6.87089	3.518	0.00306305	0.017425	-2.0109
Ubp1	0.182781	6.3893	4.95004	0.000169202	0.00274936	0.870919
Nfic	0.18274	6.86454	3.93457	0.00130019	0.00993785	-1.16972
Vps13c	0.182337	7.40802	4.04197	0.00104372	0.00855509	-0.965832
Arfgap2	0.181801	6.14298	4.52196	0.000395019	0.0046176	0.0462309
Whsc1l1	0.181696	6.98783	4.11652	0.000896455	0.00776663	-0.806618
Tmem65	0.18159	6.36246	3.90766	0.00137393	0.010317	-1.19864
Entpd3	0.181279	4.70602	3.38836	0.00400163	0.0210059	-2.04858
Tcerg1	0.181242	6.71217	3.7498	0.0019001	0.0128069	-1.53683
Snx30	0.181123	6.35691	3.5955	0.00261077	0.0157653	-1.82752
Ppp1r9a	0.180965	7.67131	4.48491	0.000425479	0.00485063	-0.0800118
Fam133b	0.180908	5.07656	3.01283	0.00865854	0.0356445	-2.8416
Rab6b	0.180777	9.75469	3.42564	0.00370554	0.0198645	-2.20373
Luc7l	0.180725	6.91053	5.08212	0.000130806	0.00239643	1.1062
Lrsam1	0.180547	6.61758	3.30993	0.00470358	0.0234565	-2.41727
Plcb4	0.180522	7.46544	3.19005	0.00601978	0.0278235	-2.68281
Limk2	0.18037	6.05233	3.30758	0.00472636	0.0235401	-2.37995
Lrpprc	0.180245	7.18853	5.0088	0.000150858	0.00258462	0.958127
Fbxo34	0.180067	5.46697	3.76906	0.0018263	0.0124907	-1.39432
Nfx1	0.180036	6.29921	3.68698	0.00216234	0.0139386	-1.63908
Hnrnpu	0.179578	8.96648	3.73297	0.00196703	0.0130859	-1.59339
Arfgap1	0.179513	6.13925	3.91516	0.00135295	0.0102137	-1.16705
Eme2	0.179495	4.96402	3.43562	0.00363009	0.019621	-1.99403
Tubgcp3	0.17927	5.33882	3.84901	0.00154961	0.0112013	-1.21937
Fbxo38	0.178995	5.96196	4.69957	0.000277202	0.0036954	0.40976
Eif2ak4	0.178805	5.3508	3.47663	0.0033358	0.0185488	-1.96487
Ptpn4	0.178725	7.16229	3.5674	0.00276646	0.0163586	-1.91986
Tmem9	0.178717	5.75889	3.5526	0.00285216	0.0166827	-1.86059
Rsf1	0.178687	6.40754	4.10833	0.000911546	0.00785804	-0.797547
Zfp598	0.178626	5.65853	3.52991	0.00298871	0.0171477	-1.89512
Opa1	0.17858	7.85509	4.70548	0.00027397	0.00366792	0.35616
Spsb1	0.178367	5.43881	3.05696	0.00791069	0.033481	-2.80645
Sap30l	0.178176	4.84587	3.63279	0.00241768	0.0149508	-1.58602
Cacna1c	0.177978	5.89627	3.8945	0.00141151	0.0104985	-1.18758
Sun2	0.17793	6.94702	3.07841	0.00757045	0.032462	-2.89188
Stau2	0.177701	7.24533	4.00823	0.00111823	0.0089479	-1.03105
Cir1	0.177564	5.16789	3.35146	0.00431778	0.0220953	-2.18951
Ythdc2	0.177391	5.29337	3.48497	0.00327888	0.0182907	-1.94089
Vps9d1	0.177079	5.62758	3.05078	0.00801143	0.0337887	-2.8424
Zfand5	0.177036	7.2108	3.16575	0.00632804	0.0287404	-2.72622
Map2k7	0.176977	5.50698	3.77033	0.00182154	0.0124677	-1.39638
Cxxc4	0.176957	5.78677	2.92012	0.0104629	0.0406475	-3.11606
Klhl20	0.176792	5.36448	3.02594	0.0084293	0.0350509	-2.85718
Btrc	0.176616	7.25114	4.08359	0.000958707	0.00809986	-0.879145
Serinc1	0.176427	9.91479	3.46457	0.00341973	0.018835	-2.12283
Nedd4l	0.176373	5.93582	3.58626	0.00266094	0.0159718	-1.81096
Atp2b1	0.176206	7.67883	4.19349	0.000766507	0.00703784	-0.663921
Wdr59	0.175759	5.36847	3.42176	0.00373535	0.0200036	-2.07643
Akap12	0.17565	8.42348	3.52714	0.00300587	0.0171839	-2.01255
Ptprn	0.175562	8.71252	2.8182	0.0128712	0.046887	-3.41776
Elmsan1	0.175546	5.30073	3.47609	0.00333952	0.0185563	-1.95955
Selo	0.175521	5.08932	3.54256	0.00291179	0.0168802	-1.79929
Fam219a	0.175068	7.80727	3.75596	0.00187618	0.0126893	-1.54863
Trim44	0.174992	6.01599	3.24171	0.00541292	0.0258421	-2.50768
Ppp3cc	0.174837	4.90178	2.77622	0.0140131	0.0498	-3.26851
Trim23	0.174705	6.02013	3.48514	0.00327775	0.0182907	-2.02183
Atg2b	0.174566	7.24803	3.2035	0.00585559	0.0272742	-2.65197
Ubr5_1	0.174562	5.31621	3.03957	0.00819742	0.0343511	-2.82397
Dnajc7	0.174392	7.22424	3.36903	0.00416424	0.021556	-2.32046
Lemd3	0.174278	4.9598	3.28558	0.00494548	0.0243221	-2.28998
Ncs1	0.174111	7.13235	2.87799	0.0113997	0.0430068	-3.2903
Zmym3	0.17401	7.21534	3.58575	0.00266375	0.0159718	-1.88402
Mtdh	0.173939	6.05054	3.8419	0.0015724	0.0113189	-1.30721
Ppp1r13b	0.173919	5.9669	3.21028	0.00577451	0.0270248	-2.56532
Tmcc1	0.173834	5.64885	3.97735	0.00119114	0.00938344	-0.996944
Otud4	0.173432	6.0213	3.85317	0.00153642	0.0111367	-1.28197
Hrh3	0.173429	5.63504	2.85588	0.0119237	0.0444359	-3.22228
Ldb1	0.173377	6.26009	3.86882	0.00148787	0.0108762	-1.26969
Gbe1	0.172754	5.22899	3.6863	0.00216537	0.0139524	-1.53111
Wee1	0.17273	4.95894	3.04167	0.00816217	0.03424	-2.76758
Lrrc58	0.172632	5.81812	2.9232	0.0103974	0.0404935	-3.11361
Tnks	0.172573	6.66297	2.98641	0.00913896	0.0369903	-3.06085
Dgat1	0.172431	4.86758	3.54157	0.00291776	0.0168912	-1.77008
Matr3	0.172062	7.96991	3.47173	0.00336967	0.0186577	-2.12379
Actr6	0.172042	5.0596	3.14405	0.00661654	0.0295594	-2.583
Mpnd	0.171998	5.82509	3.61985	0.002483	0.0152465	-1.73255
Etv3	0.171851	5.02382	3.28876	0.00491315	0.0242138	-2.29311
Tmem30a	0.171688	8.58587	3.34569	0.00436948	0.0222943	-2.37692
Acsl3	0.171556	8.23311	3.14237	0.00663935	0.0295871	-2.78381
Luzp1	0.1715	7.38643	2.91635	0.0105434	0.0408489	-3.22124
Ica1	0.171356	5.5549	3.22415	0.00561209	0.0264303	-2.49206
Zmym2	0.171263	6.73741	4.16722	0.000808551	0.0072812	-0.696199
Uckl1	0.171256	4.73918	3.05873	0.00788195	0.0333832	-2.69898
Ubald2	0.171185	5.08747	2.81968	0.0128326	0.0467901	-3.21563
Cdc27	0.170991	6.39952	3.71515	0.00204051	0.0134127	-1.58933
Erlec1	0.170985	6.79081	3.32057	0.00460154	0.0230799	-2.40428
Epha4	0.170979	6.17534	2.94979	0.00984865	0.0390212	-3.09778
Rasa1	0.170825	5.84874	4.18215	0.000784364	0.00714734	-0.606394
Ugcg	0.170377	7.03035	3.09525	0.00731354	0.0316375	-2.8613
Fbxl17	0.170241	5.83155	3.10429	0.00717914	0.031205	-2.76076
Gabarapl1	0.170157	9.07865	2.96889	0.00947204	0.0379463	-3.12116
Actl6b	0.170125	5.30618	2.88523	0.011233	0.042583	-3.12203
Atxn3	0.170002	4.9746	3.49431	0.00321635	0.0180589	-1.87924
Zdhhc17	0.169821	6.99567	3.69819	0.00211299	0.0137295	-1.65143
Dync1i2	0.169806	7.62392	4.35128	0.000556803	0.00577218	-0.346554
Armc8	0.169754	5.6251	3.71426	0.00204426	0.0134261	-1.52198
Mga	0.169655	6.29047	3.865	0.00149959	0.0109304	-1.27965
Uvrag	0.169598	5.41271	2.82331	0.0127385	0.0465442	-3.25592
Baz2a	0.169556	6.19205	3.3428	0.00439552	0.022398	-2.32201
Psmd6	0.169315	6.79242	3.57993	0.00269591	0.0160626	-1.8831
Zfp280d	0.169223	5.59519	4.29069	0.000629356	0.00626318	-0.365956
Ppm1a	0.169115	6.89374	3.55425	0.00284247	0.0166583	-1.93871
Mcoln1	0.168827	5.987	3.85548	0.00152915	0.0110995	-1.2743
Pfkfb2	0.168713	6.10129	2.91681	0.0105337	0.0408213	-3.15525
Ttc19	0.168355	5.30604	2.96612	0.00952576	0.038103	-2.96558
Elmod1	0.168205	7.3782	3.06733	0.00774432	0.0329549	-2.92467
Smc5	0.168088	5.63972	3.75865	0.00186581	0.0126441	-1.43455
Tbce	0.167978	5.87055	3.69796	0.00211401	0.0137295	-1.58019
Slc11a2	0.167952	6.0414	3.17055	0.00626597	0.0286069	-2.65135
Gclc	0.167812	6.00045	3.26637	0.00514501	0.0249896	-2.45716
Adck3	0.167732	4.79503	2.91793	0.0105096	0.0407683	-2.98019
Mum1	0.167444	5.29056	2.95729	0.00969906	0.0385719	-2.98056
Ano8	0.167407	5.99725	2.8711	0.0115605	0.0434463	-3.23374
Stk35	0.167208	4.75267	3.4214	0.00373809	0.0200114	-1.99066
LOC103690502	0.16688	5.09141	3.44043	0.00359432	0.0195017	-2.00261
Ccdc25	0.16661	5.59126	3.28866	0.00491418	0.0242138	-2.36855
Wdr45	0.166408	5.13333	2.97183	0.00941533	0.0378062	-2.92972
Arhgap20	0.166333	6.14789	2.85341	0.0119836	0.0445764	-3.28247
Trim33	0.166259	6.25953	3.71273	0.0020507	0.0134515	-1.58424
Pcyt1b	0.166161	6.35727	3.00369	0.00882183	0.036112	-3.00735
Epc1	0.165906	5.46726	3.06356	0.00780436	0.0331123	-2.79729
Hnrnpdl	0.16588	7.5617	3.4423	0.00358048	0.0194535	-2.17915
Mapk6	0.16568	7.33191	3.12916	0.00682193	0.0300587	-2.80145
Ypel5	0.165586	7.14543	3.35684	0.0042702	0.0219378	-2.34311
Pitpnm1	0.165552	7.89817	3.74424	0.00192196	0.0129042	-1.57303
Ralgapa1	0.165456	7.37948	3.72615	0.00199485	0.0131901	-1.60361
Ric8b	0.165362	6.19903	4.25092	0.000682158	0.00656726	-0.497556
Ttc7b	0.165197	6.9843	4.35563	0.000551934	0.00573309	-0.326492
Zfp717	0.165158	6.55636	3.60997	0.00253408	0.0154511	-1.81113
Opcml	0.165096	7.69879	3.48949	0.00324851	0.0181666	-2.08576
Zfp317	0.165054	4.84051	3.08929	0.00740344	0.0318855	-2.65622
2003-09-01	0.165	6.62642	3.59776	0.00259861	0.015704	-1.83956
Trerf1	0.164824	4.95269	2.80229	0.0132928	0.0479105	-3.22748
Cab39	0.164702	7.99134	3.475	0.003347	0.0185715	-2.11731
Dlg2	0.164381	8.04228	3.16022	0.00640036	0.0289637	-2.74794
Dopey2	0.164354	6.29898	3.17409	0.00622054	0.0284825	-2.66669
Slc39a10	0.16424	7.10627	3.82336	0.00163342	0.0115929	-1.40145
Tmf1	0.164239	6.59055	3.27241	0.00508143	0.0248038	-2.4908
Man1a2	0.164149	5.56816	3.29001	0.00490054	0.024177	-2.36312
Vamp4	0.164125	6.63502	3.49431	0.00321636	0.0180589	-2.04835
Ocrl	0.164068	5.77715	2.82771	0.0126253	0.0462653	-3.29362
Npm1	0.164051	7.32453	3.11309	0.0070507	0.0307982	-2.83316
Arfgef1	0.163854	7.19464	4.35709	0.000550305	0.00572376	-0.328476
Usp32	0.163853	7.65039	3.55333	0.00284787	0.0166701	-1.95649
Armcx3	0.163748	7.02354	3.63736	0.00239501	0.0148517	-1.77512
Nrip1	0.163542	4.91777	3.21041	0.00577294	0.0270248	-2.43149
Myo9a	0.163312	6.35244	3.20947	0.00578407	0.0270534	-2.60053
Gnptab	0.162943	6.25142	3.97179	0.00120477	0.00944044	-1.06168
Snap91	0.162909	8.7396	3.37303	0.0041301	0.0214573	-2.32111
Inpp5k	0.162851	5.44713	3.47223	0.00336616	0.0186473	-1.98567
Rc3h2	0.162829	6.24573	3.02427	0.00845828	0.0351275	-2.95806
Unc79	0.162744	6.04167	3.6751	0.00221589	0.0141154	-1.64219
Dennd5b	0.162711	5.53497	3.04272	0.00814475	0.0341853	-2.84679
Polr1a	0.16252	5.02027	3.16983	0.00627513	0.028632	-2.52662
Ylpm1	0.162241	7.0115	4.27793	0.000645832	0.0063465	-0.482903
Mbnl2	0.162125	7.5702	3.56668	0.00277056	0.0163705	-1.9286
Pex14	0.161729	5.78091	3.58184	0.00268532	0.0160423	-1.80436
Psmc5	0.161491	7.96725	3.29136	0.00488691	0.0241355	-2.48599
Foxj3	0.161457	6.09372	3.60584	0.00255574	0.0155145	-1.78606
Gdap2	0.161223	4.56926	2.86892	0.0116118	0.0435762	-3.03478
Usp9x	0.16115	9.00539	3.97886	0.00118746	0.00936574	-1.09592
Tiam1	0.16106	5.53794	3.0582	0.00789054	0.0334047	-2.81685
Znrf1	0.160886	5.57982	3.89101	0.00142163	0.0105307	-1.16262
Dnajb14	0.160786	5.13741	2.84015	0.0123106	0.045426	-3.18412
Pdp1	0.16048	5.31723	3.41302	0.00380323	0.0202013	-2.08726
Fam169a	0.160394	6.31764	2.85549	0.0119332	0.0444359	-3.29309
Srsf5	0.160356	7.60283	3.15493	0.0064703	0.0291405	-2.75462
Ctps2	0.160062	6.11834	3.57204	0.00274012	0.0162396	-1.8561
Cep120	0.159725	6.04649	3.72325	0.00200678	0.0132522	-1.54574
Igip	0.159691	8.07699	3.45399	0.00349516	0.0191258	-2.15998
Elp2	0.159597	6.65869	3.73558	0.00195649	0.0130633	-1.56309
Mafg	0.15953	6.79991	3.16476	0.00634091	0.0287629	-2.71535
Tubgcp2	0.159415	5.82249	3.20325	0.00585856	0.0272796	-2.56433
Plekhb2	0.159411	9.17713	4.255	0.000676541	0.00654156	-0.537942
Cdc23	0.159406	6.18577	3.24301	0.00539844	0.0257966	-2.52053
Rtf1	0.159406	6.3336	3.63351	0.00241407	0.0149344	-1.74942
Pdpk1	0.159385	7.30711	4.35759	0.000549748	0.00572176	-0.32959
Dync1h1	0.159235	10.0685	3.09599	0.00730236	0.0316066	-2.85627
Rfx5	0.15923	6.22996	3.75596	0.00187617	0.0126893	-1.49492
Ddx39b	0.159175	7.63732	3.73123	0.00197408	0.0131081	-1.59693
[truncated: 224 more rows]

## Sheet: DEGs_down
GeneID	logFC	AveExpr	t	P.Value	adj.P.Val	B
Thrsp	-1.79601	4.24148	-5.37925	0.000228194	0.00326672	0.920337
Kctd14	-1.74417	3.46652	-10.8849	2.56418e-08	0.000161803	8.35224
Hba2	-1.66312	6.47207	-4.35021	0.00132003	0.0100471	-0.937457
Igfbp5	-1.54989	8.64302	-6.53296	4.67571e-05	0.00135576	2.36705
Alox15	-1.53618	1.08686	-7.04314	4.0308e-06	0.000457525	3.41742
LOC103694857	-1.53477	1.64508	-5.0087	0.00024382	0.00341347	0.542409
Espn	-1.45138	2.90788	-6.46251	1.98914e-05	0.000880694	2.87025
Hbb	-1.42894	6.6952	-3.48309	0.00561092	0.0264303	-2.40911
Bst2	-1.41881	3.30717	-3.65239	0.00378208	0.0201299	-1.6721
Esm1	-1.4063	1.88501	-4.02684	0.00161783	0.0115347	-0.961356
Hba1	-1.4035	7.89767	-3.18065	0.00948725	0.0379906	-2.96986
Rbp1	-1.39463	3.61119	-3.29828	0.00725213	0.0314326	-2.29733
Col6a3	-1.37407	3.19887	-3.07105	0.0107742	0.0414052	-2.61832
LOC100134871	-1.371	5.86363	-3.39965	0.0064226	0.0290175	-2.48019
RT1-Ba	-1.3687	2.7353	-3.08785	0.0102861	0.0401698	-2.5409
Lum	-1.36699	3.14667	-3.9593	0.0020895	0.0136204	-1.13386
C3	-1.33504	5.53956	-5.12173	0.000346487	0.00424345	0.436708
Prelp	-1.32643	6.3235	-4.18009	0.00168032	0.0118157	-1.1885
Lcat	-1.32622	5.63592	-5.38927	0.000227198	0.00326564	0.846615
Ndufa10l1	-1.31736	3.7815	-5.03744	0.000312387	0.00396856	0.59497
Msx1	-1.31646	4.90094	-3.24187	0.00827333	0.0345398	-2.60818
Top2a	-1.31186	1.32971	-4.10695	0.0012442	0.00963855	-0.803998
Glra4	-1.29299	5.59236	-6.18162	6.34948e-05	0.00159901	2.09241
Cpz	-1.28989	2.18334	-3.40139	0.00544082	0.0259284	-1.97544
Thbs4	-1.28746	2.41181	-4.61456	0.000515449	0.0055075	0.0436676
Clca1	-1.278	1.50757	-4.63996	0.000415299	0.00478327	0.0946144
Wif1	-1.27054	6.13504	-6.10131	7.53566e-05	0.00175131	1.90697
LOC689064	-1.27022	0.897647	-6.02596	2.21893e-05	0.000928911	2.17526
Chdh	-1.26793	3.67281	-6.66237	1.52583e-05	0.00081572	3.287
Cdkn1c	-1.25095	4.39265	-2.95482	0.0136087	0.0487345	-3.0079
Alas2	-1.24811	2.15223	-3.67066	0.00314911	0.0178014	-1.51351
Islr	-1.20969	3.52171	-3.04095	0.0113372	0.0428124	-2.70829
Cela3b	-1.19935	0.833902	-5.80145	3.34765e-05	0.00114492	1.86129
Angptl2	-1.19881	2.97601	-4.51816	0.000650975	0.00638501	-0.113808
Hba-a1	-1.19454	1.86775	-3.15821	0.00831443	0.0346837	-2.3405
Aldh1a2	-1.19025	6.4283	-5.37484	0.000231673	0.00329005	0.776766
Thbs1	-1.17928	2.97857	-4.49671	0.000670855	0.00651474	-0.141495
Wt1	-1.17064	5.0579	-5.53651	0.000153252	0.00259519	1.24146
Mpzl2	-1.16018	4.05584	-4.70563	0.000551115	0.00572837	0.0576668
RGD1305645	-1.15856	3.57986	-4.43993	0.000827149	0.0073826	-0.311849
Ifitm1	-1.15334	1.56271	-3.33309	0.00569935	0.0267289	-2.03256
Gdf10	-1.15288	4.0642	-6.26418	3.17542e-05	0.00111392	2.68838
RT1-Db1	-1.15288	2.24441	-3.02467	0.0109002	0.0417062	-2.57935
Prdm6	-1.13519	2.13995	-3.37681	0.00539264	0.025782	-1.97864
Cemip	-1.13432	4.13431	-3.29893	0.00719741	0.0312473	-2.37134
Prrx2	-1.11226	1.54658	-4.83919	0.000242707	0.0034066	0.528124
Bgn	-1.10284	5.06638	-3.72964	0.00342528	0.0188523	-1.78751
Ugt1a6	-1.08565	2.30404	-3.2739	0.00658967	0.0295	-2.15402
Fbln1	-1.08498	5.89671	-4.84416	0.000517805	0.00552513	-0.00493886
Ngfr	-1.06742	3.15114	-6.85501	6.06168e-06	0.000539489	3.95236
Wdr86	-1.06367	0.780958	-3.06742	0.00901988	0.0366885	-2.4306
Ucp2	-1.06063	6.61186	-7.26012	1.06065e-05	0.000689381	3.7878
Acsm5	-1.05769	1.9406	-5.95017	2.54743e-05	0.000990146	2.41151
Slc22a3	-1.05639	4.60748	-6.07768	4.82275e-05	0.00136607	2.32909
Amhr2	-1.052	2.86276	-7.16081	3.08539e-06	0.000435401	4.41463
Cyp26b1	-1.05103	3.90247	-3.33509	0.00654979	0.0293914	-2.25865
Ctsk	-1.04876	3.50969	-4.48294	0.000698115	0.00666379	-0.1694
Mall	-1.04729	1.65222	-6.00345	2.31161e-05	0.000936389	2.39891
Thbs2	-1.04118	4.44458	-4.73021	0.000526463	0.00557951	0.0721196
Mas1	-1.0395	1.65683	-4.91173	0.00019877	0.00306449	0.707102
Ighv	-1.03796	1.1412	-4.94486	0.000174121	0.00280024	0.712699
Isg15	-1.03374	1.59469	-4.29179	0.000728164	0.00683487	-0.352378
Casr	-1.03363	3.7547	-5.34962	0.000136452	0.00246333	1.32305
Serpinf1	-1.0313	2.15157	-3.44654	0.00452446	0.0228309	-1.83624
Fcgr3a	-1.03082	1.96102	-3.93653	0.00161264	0.0115029	-0.974076
Slc2a10	-1.02459	3.06357	-4.41609	0.000715429	0.00675089	-0.207086
Matn4	-1.01707	1.98103	-6.74174	6.26345e-06	0.000545059	3.51055
Col14a1	-1.00984	3.93097	-3.08582	0.0103308	0.0403144	-2.6913
Ccdc3	-1.00811	4.09934	-4.85733	0.000372589	0.00443146	0.402261
Ppic	-1.00572	2.18527	-3.43907	0.00454588	0.0228864	-1.84241
Bcat2	-1.00158	4.70705	-6.65033	1.65388e-05	0.000832255	3.32825
Lamc3	-0.998742	4.0195	-3.27216	0.00733052	0.0316847	-2.38415
LOC102551963	-0.998569	1.37331	-3.00864	0.01026	0.0401081	-2.52807
Kdelr3	-0.997636	1.63384	-5.65772	4.37158e-05	0.00129747	1.90279
Sod3	-0.99012	5.37731	-3.65236	0.0039051	0.0206444	-1.96135
Enpp3	-0.989558	1.59597	-4.60703	0.000360292	0.00434124	0.217042
Mmp14	-0.987657	5.16443	-3.82533	0.00284678	0.0166701	-1.6271
Serpinh1	-0.98587	6.17449	-4.40131	0.00107896	0.00873419	-0.760845
Gpr182	-0.985696	1.58672	-2.87141	0.0136148	0.0487345	-2.76182
LOC690131	-0.977177	1.27887	-6.12269	1.86259e-05	0.000863475	2.44014
Sulf1	-0.976388	5.73553	-4.65384	0.000677575	0.00654752	-0.271967
Ptgr1	-0.976213	2.19326	-5.99494	2.34771e-05	0.000942935	2.55173
LOC690414	-0.968928	0.64326	-4.83683	0.000211314	0.00315104	0.460574
Hbb-b1	-0.968034	1.52978	-3.49713	0.00374362	0.0200273	-1.70076
Ptprv	-0.96765	3.24819	-4.47571	0.000630749	0.0062651	-0.092763
Hist1h4b	-0.964441	3.39888	-3.67549	0.00316386	0.0178654	-1.55134
Pmel	-0.955786	2.47869	-6.51846	9.22338e-06	0.00064787	3.39253
Adamts13	-0.955059	0.862596	-4.09224	0.000988645	0.00827251	-0.687771
Wfdc1	-0.953802	5.3028	-8.14585	1.41951e-06	0.000330003	5.6593
Edn3	-0.949756	2.71958	-7.49102	1.79556e-06	0.000333135	4.79027
Gldn	-0.944086	2.91336	-4.23722	0.000942283	0.00799562	-0.464955
Ezr	-0.938234	6.7258	-3.38394	0.00640774	0.0289754	-2.56602
C1qtnf5	-0.93669	5.19267	-6.92565	1.08598e-05	0.000695625	3.73452
Mgp	-0.936307	5.15888	-3.80845	0.0028926	0.0168	-1.6472
LOC100360552	-0.923484	1.66084	-3.08509	0.00871001	0.0357999	-2.39792
Irgm	-0.922227	3.28228	-4.47263	0.000616671	0.0061687	-0.0761886
Fam198b	-0.913889	3.74836	-5.5282	8.20949e-05	0.00183968	1.77019
Adamts12	-0.907147	3.05603	-3.83296	0.00214356	0.0138404	-1.19541
Serping1	-0.90514	5.03519	-3.91433	0.00233879	0.0146712	-1.43079
LOC100910200	-0.900376	0.500048	-6.77801	5.88565e-06	0.000536004	2.92226
Tcn2	-0.897612	6.10656	-6.4201	3.02352e-05	0.00108134	2.74117
Aplnr	-0.891531	4.98194	-3.8699	0.00252006	0.0154085	-1.49831
Siglec1	-0.889865	0.922879	-3.22789	0.00604576	0.0278907	-2.12055
Card11	-0.889456	2.70685	-6.24626	1.49214e-05	0.000805962	3.06778
Slc7a8	-0.886304	6.86585	-6.97877	1.27306e-05	0.000749667	3.5736
Mxra8	-0.885329	4.76048	-5.14719	0.000224367	0.00324813	0.843585
LOC108349760	-0.884571	1.21165	-4.52749	0.000390664	0.00459067	0.0926923
Asgr1	-0.88336	1.35575	-4.70198	0.000275881	0.00368092	0.392661
Dao	-0.877699	5.41725	-10.0989	5.02581e-08	0.000161803	8.76392
Oas1a	-0.876327	1.72506	-2.8923	0.0126859	0.0464173	-2.71465
Col4a6	-0.876233	3.08942	-4.06736	0.00131161	0.0099927	-0.76067
Alpl	-0.875902	3.74823	-6.25461	1.83932e-05	0.000861159	3.11832
Clec7a	-0.875789	0.711906	-3.67895	0.00228269	0.014412	-1.36272
Hist1h2bh	-0.86216	5.37011	-5.66211	9.61537e-05	0.00197399	1.63058
Zfp185	-0.859266	2.32539	-5.97442	2.43715e-05	0.000957044	2.55897
Hmgcs2	-0.850888	6.12143	-4.56856	0.000752921	0.0069693	-0.418832
Mylk3	-0.850604	1.03263	-3.47591	0.00354552	0.0193105	-1.69023
Wnt5b	-0.847999	3.74843	-5.66137	5.68551e-05	0.0015069	2.09554
En2	-0.847953	0.981948	-4.52146	0.00039541	0.00461872	0.0466083
Cyp4f1	-0.847119	3.39153	-7.70908	1.26571e-06	0.000309782	5.3701
Pdpn	-0.84659	4.81247	-5.79233	6.46181e-05	0.00161193	2.02046
Scd	-0.846292	6.67723	-5.79926	8.91374e-05	0.0018945	1.6631
Arhgap8	-0.846106	2.3168	-5.29528	8.67352e-05	0.00187655	1.50879
Cnpy1	-0.845735	2.28853	-4.15063	0.000933007	0.00796003	-0.503936
Ifi47	-0.845329	2.0841	-4.56503	0.000377677	0.00447837	0.240683
Nid1	-0.840228	6.3605	-4.85771	0.000451801	0.00504168	0.0709632
Oasl2	-0.839737	2.87792	-2.90157	0.0131476	0.0475402	-2.80347
Chmp4c	-0.837799	1.01708	-3.22379	0.00601327	0.0278098	-2.11578
LOC100910973	-0.83774	3.88902	-3.18267	0.00823059	0.0344164	-2.49175
Cd4	-0.827756	4.55516	-4.03575	0.00171211	0.0119779	-1.09131
Twist1	-0.826143	0.879607	-5.30381	8.53309e-05	0.00186058	1.19564
Cyp2j3	-0.825036	4.87457	-7.55263	2.36394e-06	0.000363027	5.13087
Gbp2	-0.822063	2.91656	-3.17126	0.00769497	0.0328036	-2.3352
Sgcg	-0.820491	3.6084	-6.4947	1.01292e-05	0.000675084	3.62495
Bcl2a1	-0.818951	0.83022	-5.72527	3.85493e-05	0.00121009	1.76402
Smoc2	-0.816835	1.96776	-3.28517	0.00557869	0.0263286	-2.03549
Slc12a7	-0.815308	4.03942	-3.28431	0.00680319	0.0300184	-2.3374
Tnfsf13	-0.813175	4.36314	-7.21526	3.37748e-06	0.000440873	4.7432
Sctr	-0.807783	2.04791	-4.23565	0.000741418	0.00690462	-0.331116
Hist1h1c	-0.806893	6.53882	-4.98959	0.000352546	0.00428416	0.303604
Cilp	-0.806805	1.14882	-4.34898	0.000559389	0.00578543	-0.201514
Clec4a3	-0.801825	2.00884	-4.34635	0.000577446	0.00591184	-0.125955
MGC108823	-0.801376	0.840508	-4.20794	0.000744326	0.00692346	-0.469384
Adgre1	-0.800755	3.47736	-5.54667	6.14459e-05	0.00157315	1.99196
Irgm2	-0.800513	4.22908	-4.09938	0.00140447	0.0104512	-0.881008
Cd68	-0.799706	1.69085	-4.03681	0.00108686	0.00876653	-0.682439
Mrc2	-0.793627	5.48851	-4.09305	0.00164845	0.011668	-1.15182
Fndc1	-0.787793	2.48863	-3.37156	0.00480646	0.023833	-1.9128
Tmem158	-0.785994	3.68469	-4.79915	0.000296785	0.00384838	0.576409
Rarres2	-0.785045	3.71849	-3.55934	0.00377096	0.0201181	-1.75953
Etfbkmt	-0.784912	2.38573	-3.14263	0.0076671	0.0327383	-2.313
Vstm4	-0.783304	3.33118	-5.23538	0.000109316	0.00213507	1.45842
Gypc	-0.781814	1.62415	-3.22937	0.00600718	0.0277942	-2.10438
Metrn	-0.78163	6.09698	-6.11746	4.31973e-05	0.00129119	2.36985
Crispld2	-0.779793	3.57527	-4.04268	0.00138879	0.010388	-0.833234
Plin3	-0.773161	2.89548	-3.66601	0.00269398	0.0160626	-1.41389
Ifi44	-0.772748	3.26611	-3.23235	0.00687718	0.0302087	-2.2675
LOC102555634	-0.772513	1.11074	-3.652	0.00234902	0.014718	-1.35866
RGD1559575	-0.77235	0.701996	-3.89925	0.00139781	0.0104164	-0.980379
Capn6	-0.768001	2.78854	-5.74875	3.69061e-05	0.00117739	2.32483
Smo	-0.767778	5.26227	-7.71796	1.77415e-06	0.000333135	5.4182
Tubb6	-0.766667	3.22743	-4.32052	0.000706459	0.00670665	-0.222976
Lxn	-0.76499	4.94743	-4.28201	0.00107095	0.00868737	-0.690406
Gpr37l1	-0.757621	8.05373	-6.82697	1.33929e-05	0.000769095	3.48881
Cthrc1	-0.756311	1.4752	-4.74227	0.000254703	0.00351888	0.477411
Draxin	-0.752041	3.34864	-4.50225	0.00048836	0.00532336	0.110499
Bambi	-0.751861	3.05481	-5.06835	0.000140532	0.00249375	1.20291
Tgfbi	-0.751564	4.61629	-5.17065	0.000176422	0.00281948	1.05113
Pter	-0.751373	2.2833	-5.99812	2.33414e-05	0.000942319	2.58233
Maob	-0.749909	6.73672	-7.07584	7.99741e-06	0.000611998	3.99357
Pik3ap1	-0.749143	3.36742	-4.64273	0.000364503	0.00438186	0.374868
Colec12	-0.748979	4.04448	-3.45697	0.00471196	0.0234833	-2.00584
Hacd4	-0.748411	2.33193	-3.84265	0.0016935	0.0118849	-1.02036
Klhdc7a	-0.744723	4.86402	-3.08443	0.01023	0.0400306	-2.8504
Efemp1	-0.740927	3.245	-2.95235	0.0117935	0.0440607	-2.75439
Mdfi	-0.739061	1.65362	-4.36051	0.000546524	0.00570337	-0.118861
S100a11	-0.734456	2.84361	-3.12347	0.0080784	0.0339959	-2.38461
Moxd1	-0.733115	2.45194	-2.96553	0.0108174	0.0415099	-2.61737
Efnb1	-0.732403	3.83141	-4.63312	0.000407645	0.00471591	0.276575
Pcdh12	-0.728396	0.648213	-4.93722	0.000173504	0.00280013	0.610814
Cyp2j4	-0.727512	1.41748	-5.39262	7.2036e-05	0.00170707	1.46289
Parp14	-0.726923	3.6712	-3.42193	0.00479352	0.0237839	-1.98382
Tec	-0.726697	2.90973	-3.22742	0.00655124	0.0293914	-2.20478
Nnat	-0.724731	9.2994	-5.86887	6.77346e-05	0.00165007	1.89184
Tap1	-0.723402	2.62444	-3.39524	0.00443931	0.0225258	-1.85502
Lrrc17	-0.719421	0.74038	-3.56386	0.00278669	0.0164286	-1.52192
Dnajc22	-0.716344	0.590261	-3.62028	0.00248079	0.0152389	-1.44139
Abhd1	-0.714746	4.14701	-6.25216	1.65579e-05	0.000832255	3.24693
Cox6b2	-0.710422	1.10325	-2.90868	0.0111492	0.042368	-2.62012
Ada	-0.708581	1.9092	-4.94921	0.000169477	0.00275097	0.880189
Rhpn1	-0.707665	4.87902	-3.73483	0.00293589	0.0169509	-1.66282
Nlrc5	-0.705241	1.93567	-3.62001	0.00257364	0.0155771	-1.39444
Dock8	-0.705198	3.76302	-5.45885	6.98982e-05	0.00168444	1.8908
Emp2	-0.704229	2.52263	-5.03414	0.000143593	0.00251828	1.1158
Col26a1	-0.703517	0.686669	-2.88073	0.0115954	0.0435354	-2.65558
Zfp474	-0.702565	1.64058	-3.10563	0.00753762	0.0323389	-2.29933
Ctsz	-0.701525	4.77258	-6.2811	1.86322e-05	0.000863475	3.16473
Tgfb3	-0.699844	3.67161	-5.97289	2.44393e-05	0.000957044	2.83892
Vsir	-0.699599	6.17991	-9.53941	8.9246e-08	0.000182661	8.28227
Fcer1g	-0.696514	3.95135	-5.68073	4.63652e-05	0.00134743	2.27881
Aass	-0.695977	3.27432	-4.56046	0.000401745	0.00467876	0.276652
Rps4y2	-0.695733	2.98482	-3.54779	0.00329146	0.0183478	-1.60557
Cenpf	-0.693414	0.75349	-3.69192	0.00214045	0.0138317	-1.31145
Rsad2	-0.692152	2.46851	-3.60922	0.00272295	0.0161623	-1.43308
Fam129a	-0.691767	2.66726	-3.5423	0.00320078	0.0180154	-1.5743
Nkain4	-0.688751	5.15845	-6.28179	2.02406e-05	0.000885258	3.08548
Mrgprx3	-0.688707	0.435621	-4.01945	0.00109286	0.00879679	-0.820591
Wdfy4	-0.687289	2.42518	-5.77123	3.54005e-05	0.00117198	2.27792
LOC102548287	-0.685629	0.642891	-4.65581	0.00030239	0.00389847	0.192613
Ddit4l	-0.682972	1.324	-4.32425	0.000588056	0.00597665	-0.217777
LOC102552985	-0.682886	1.56891	-4.12531	0.000880549	0.00768771	-0.520632
Itgal	-0.682172	2.04895	-3.28687	0.00520749	0.0251915	-1.99105
Emp1	-0.680782	3.16997	-3.28023	0.00587127	0.0273144	-2.1318
Mei4	-0.680014	1.27306	-4.25064	0.000682553	0.00656726	-0.344283
RT1-A2	-0.67712	4.33763	-3.13753	0.00874522	0.0359164	-2.63459
Gstt1	-0.676561	1.97938	-4.71153	0.000270701	0.00364093	0.503593
Cd48	-0.675667	4.58533	-3.80929	0.00238686	0.0148364	-1.44092
Copz2	-0.675251	2.38847	-4.83461	0.000212242	0.00315104	0.763636
Tgif2	-0.674873	1.4314	-3.96309	0.00122643	0.00954335	-0.805437
Apobec1	-0.674147	1.09912	-3.40939	0.00383181	0.0203118	-1.75817
Ggta1	-0.672372	3.49158	-5.3847	7.31297e-05	0.00171482	1.82468
Aldh1a1	-0.672339	5.43311	-3.51454	0.00456619	0.0229559	-2.15652
Pbxip1	-0.672204	6.79644	-3.61736	0.00395618	0.0208301	-2.11714
LOC102550895	-0.668108	1.02425	-2.89665	0.0112156	0.0425379	-2.62866
Reln	-0.668037	8.41515	-5.13182	0.000239733	0.00337392	0.62747
Exoc3l4	-0.667675	2.53726	-4.12309	0.000892119	0.0077462	-0.465938
Slamf8	-0.665947	0.865519	-4.17872	0.000789859	0.00716822	-0.512046
Hist1h2bf	-0.664034	0.438197	-3.92722	0.00131991	0.0100471	-0.965341
Antxr2	-0.663934	3.63839	-3.48119	0.00405921	0.0212157	-1.83966
Parp12	-0.662852	3.10289	-4.07603	0.00106082	0.0086545	-0.602523
Ube2l6	-0.662782	2.4183	-4.76488	0.000243559	0.00341347	0.649562
Fmo1	-0.662759	2.12658	-3.04996	0.00854577	0.0353568	-2.41425
Arhgap25	-0.662533	2.64913	-6.411	1.11389e-05	0.00070072	3.2941
Aebp1	-0.662342	6.90808	-3.47917	0.00509318	0.0248457	-2.37101
Nes	-0.662024	1.86129	-3.27882	0.00517597	0.0250855	-1.98873
Asap3	-0.661555	3.43418	-3.34557	0.00522371	0.025231	-2.05135
Rab7b	-0.661182	3.73333	-6.02721	2.21389e-05	0.000928911	2.93618
Lama2	-0.661167	5.61955	-2.92568	0.013776	0.0491881	-3.24482
Slc16a5	-0.661068	2.74974	-3.47518	0.00364946	0.019685	-1.69471
Hyal1	-0.660315	5.7257	-4.29444	0.00103701	0.00852076	-0.745933
Gsdmd	-0.65876	3.44181	-5.4284	6.7304e-05	0.00164213	1.89625
Msx2	-0.658361	2.18445	-5.48826	6.00935e-05	0.00155622	1.7856
Fam46c	-0.657617	1.38352	-3.17877	0.0062491	0.0285632	-2.15064
Chst5	-0.657303	1.88204	-7.32986	2.33436e-06	0.000362729	4.20311
Kifc1	-0.656046	0.861494	-4.35025	0.000557961	0.00577654	-0.240311
Irak3	-0.655609	4.01491	-4.81319	0.0002656	0.00363033	0.656457
NEWGENE_1565505	-0.655415	2.50399	-4.07278	0.000980085	0.00822445	-0.550561
Cdc42ep4	-0.655071	6.70328	-4.55132	0.00068215	0.00656726	-0.386834
Arhgef19	-0.654895	3.83991	-5.62915	4.70906e-05	0.00135827	2.25194
Hhatl	-0.653554	4.93337	-5.43026	9.5097e-05	0.00196258	1.60227
Nid2	-0.65267	3.76508	-3.01441	0.0104758	0.0406877	-2.7246
Tlr2	-0.650175	2.35788	-4.90374	0.000185268	0.0029137	0.875325
Lyc2	-0.649907	1.18191	-3.04602	0.00818561	0.0343108	-2.37437
Ctsh	-0.649826	6.0584	-5.53743	9.82167e-05	0.00199025	1.53266
Samd9l	-0.649567	3.90135	-4.00938	0.00139029	0.010388	-0.87729
Aldh3b1	-0.648714	2.68917	-4.82261	0.000217319	0.00318436	0.778233
Slc37a2	-0.647438	2.50378	-4.40102	0.000503653	0.00543422	0.0301272
Psmb9	-0.646983	2.08156	-3.9671	0.0012164	0.00949359	-0.755569
Col4a5	-0.645187	5.42199	-3.34762	0.00617286	0.0283221	-2.45165
Nxn	-0.644171	5.18279	-4.71064	0.000420502	0.00481487	0.162718
Olfml1	-0.643262	4.70144	-3.57801	0.00373032	0.0199835	-1.88559
L3hypdh	-0.643058	1.50379	-3.43738	0.00361694	0.019577	-1.69703
Creb3l1	-0.642896	3.28072	-5.16985	0.00011038	0.00215316	1.43567
Meltf	-0.642755	1.88544	-4.22645	0.000716872	0.00676044	-0.321138
Hsd11b2	-0.6426	1.06311	-3.12523	0.00687716	0.0302087	-2.23554
Fads1	-0.639474	8.14345	-6.91124	8.26792e-06	0.000613785	3.91999
Itga10	-0.63941	2.09507	-3.34675	0.00449169	0.0227107	-1.87
Ebpl	-0.635882	3.28055	-4.84764	0.000206862	0.00311779	0.867497
Myh7	-0.632652	2.15984	-4.27861	0.000644939	0.0063417	-0.208721
Dap	-0.632471	4.86507	-4.39371	0.000740434	0.00689956	-0.360738
RT1-T24-1	-0.632268	0.614085	-3.13247	0.00677563	0.029966	-2.23417
Wisp2	-0.631614	0.371517	-3.76421	0.00184458	0.0125569	-1.23069
LOC102555995	-0.631283	1.23363	-3.76569	0.00183899	0.0125404	-1.15213
Gdpd2	-0.629601	5.13613	-7.35599	2.32821e-06	0.000362729	5.13177
Gch1	-0.628782	2.30596	-3.83254	0.00160291	0.0114596	-0.984733
Rac2	-0.628543	2.61481	-4.39119	0.00051373	0.00550039	0.0200676
Gna15	-0.626478	1.99	-3.21861	0.00583153	0.0272103	-2.0924
Cxcr4	-0.624774	2.59371	-2.95661	0.0104986	0.040738	-2.61457
Kazald1	-0.62424	0.835707	-4.06333	0.000999184	0.00830744	-0.700663
Zc3hav1	-0.623568	4.07175	-3.84695	0.00196573	0.0130859	-1.21755
Gadd45g	-0.62339	4.08949	-3.09693	0.00901113	0.0366624	-2.6371
Tspan33	-0.622582	5.44429	-6.1629	2.37965e-05	0.000947292	2.91033
Trappc6a	-0.622507	2.90457	-5.25026	9.45532e-05	0.00195652	1.53213
Ifitm2	-0.620805	3.46614	-3.02819	0.00977724	0.0388018	-2.62881
Tacr3	-0.620467	3.70473	-3.1428	0.00792838	0.0335377	-2.46743
Sfxn5	-0.620302	7.1417	-6.74909	1.01711e-05	0.000675084	3.71282
Lrrc55	-0.618728	5.88463	-5.22124	0.000166471	0.00273333	1.01576
B3gnt8	-0.618133	0.954878	-4.66397	0.000297521	0.00385155	0.264609
Rassf3	-0.617027	4.38587	-6.15387	1.79441e-05	0.000851231	3.17218
Cidea	-0.616942	0.899349	-3.97239	0.0012033	0.00943714	-0.840421
Tcea3	-0.616205	0.389069	-3.08138	0.00752453	0.0323093	-2.32425
Acot1	-0.616092	2.11229	-4.93845	0.000173084	0.00279793	0.895983
Htra3	-0.61388	3.44133	-4.48049	0.00045276	0.00504412	0.161194
Rarres1	-0.61367	3.44573	-2.85842	0.0136809	0.0489264	-2.93002
Gbp5	-0.613665	2.0452	-3.12863	0.00703347	0.0307572	-2.25302
Igsf10	-0.613447	3.91424	-4.44838	0.000528458	0.00559309	0.01074
Sntb2	-0.612094	1.9362	-2.91884	0.0108943	0.0417059	-2.61948
Igfbp7	-0.611998	6.31447	-4.65987	0.000511479	0.00549912	-0.102383
Ltbp1	-0.610103	3.06516	-3.89668	0.00147832	0.010841	-0.907079
Frk	-0.609467	1.46915	-3.58816	0.00265054	0.0159501	-1.43967
Ptn	-0.60849	7.92662	-6.95663	6.7728e-06	0.000560766	4.10167
Car8	-0.608032	3.46309	-4.2921	0.000669242	0.00650852	-0.196949
LOC102551184	-0.607341	0.269226	-3.54961	0.00286979	0.0167283	-1.58061
Tubb2b	-0.607003	7.10596	-5.10907	0.000225853	0.0032576	0.677165
LOC102553495	-0.606015	3.64435	-5.14374	0.000116089	0.00223393	1.40853
Lrrc51	-0.606006	1.4028	-3.15465	0.00647403	0.0291489	-2.18257
Arpc1b	-0.605888	4.74628	-3.73176	0.00269347	0.0160626	-1.58826
Ccdc170	-0.605824	1.69473	-2.80843	0.0135354	0.0485353	-2.79483
Ninj2	-0.605758	4.1309	-6.15004	1.77306e-05	0.000851231	3.17305
Aif1l	-0.605044	4.89748	-8.47766	3.8709e-07	0.000263625	6.80888
Cand2	-0.604884	4.1995	-4.247	0.000846269	0.00748929	-0.446173
Laptm5	-0.60077	4.95848	-6.62772	8.13003e-06	0.000611998	3.93377
Frzb	-0.599632	2.34995	-3.38046	0.00416977	0.0215704	-1.81109
Shisa3	-0.599579	0.368634	-4.24151	0.000695299	0.006645	-0.485307
Ncf4	-0.598411	1.16945	-3.06771	0.00773828	0.0329381	-2.33078
Lpl	-0.597607	5.18986	-3.58987	0.00369723	0.0198469	-1.94271
Ifi30	-0.597401	4.18947	-5.62353	4.7788e-05	0.00136441	2.24611
Sel1l3	-0.596324	6.20783	-7.02469	5.08635e-06	0.000501507	4.38498
Pld4	-0.595421	4.90996	-7.08409	3.50619e-06	0.000447214	4.73245
LOC685158	-0.595184	0.843004	-2.84662	0.0121501	0.0450353	-2.6975
Dhx58	-0.593605	2.81216	-3.66104	0.00236741	0.0147683	-1.3232
Cyba	-0.593527	2.91907	-4.54061	0.000380542	0.00449245	0.302562
Rhbdf2	-0.591432	1.88674	-3.33363	0.00447937	0.0226704	-1.87227
Igtp	-0.59141	2.86642	-3.80406	0.00174215	0.0121285	-1.05341
Csf3r	-0.589861	2.56526	-4.98013	0.000159536	0.00266985	1.03121
Ca5b	-0.58922	3.60783	-7.42331	2.00401e-06	0.000344954	5.05875
Cmtm7	-0.589184	3.18471	-6.11134	1.90112e-05	0.000866403	2.98571
Depdc1b	-0.588945	0.838332	-3.08561	0.00745951	0.032092	-2.30521
Il17rb	-0.588328	0.570335	-3.66324	0.00227066	0.0143476	-1.37332
Dact1	-0.587313	2.80419	-4.1795	0.000788601	0.00716096	-0.350261
Shroom3	-0.586454	4.05073	-5.00794	0.000162892	0.00268865	1.09863
LOC108353018	-0.585293	3.70575	-4.81938	0.000223181	0.00323395	0.805678
LOC681355	-0.583425	4.41129	-5.69943	4.24308e-05	0.00128152	2.35884
Fabp7	-0.583007	6.72355	-7.57799	1.88499e-06	0.000333135	5.34062
P2ry6	-0.582321	2.17985	-4.23185	0.000709063	0.00671903	-0.288168
Mmp19	-0.581893	2.04734	-4.0694	0.000986866	0.00826204	-0.579197
Steap3	-0.581781	3.44627	-5.68109	4.18515e-05	0.00127891	2.32702
Gpr17	-0.581018	5.63749	-6.14381	2.34247e-05	0.000942935	2.90963
Psmb8	-0.579901	1.66009	-3.33188	0.00449557	0.022723	-1.87624
Yap1	-0.579457	6.62945	-5.26108	0.000155378	0.00261562	1.04349
Hunk	-0.578282	2.29976	-4.33346	0.000577202	0.00591184	-0.102738
Emp3	-0.578103	2.10413	-2.93699	0.0103944	0.0404935	-2.58931
Gpc3	-0.577827	3.96583	-3.73335	0.00232935	0.0146416	-1.37777
Nrep	-0.577225	6.35233	-6.96042	5.58402e-06	0.000521822	4.28802
Myoc	-0.576908	2.77523	-3.13141	0.00718456	0.0312088	-2.30231
Sumf2	-0.576611	3.51164	-5.61301	4.75272e-05	0.00136326	2.21881
Pgghg	-0.576317	3.36457	-3.03453	0.00930083	0.0374424	-2.58089
Cbr3	-0.576228	1.18729	-3.33146	0.00449949	0.0227355	-1.88617
Nfkb2	-0.575591	2.8458	-4.18633	0.000777738	0.00711594	-0.33708
Pltp	-0.5755	6.65044	-5.76633	5.73361e-05	0.00151452	2.01554
Fam184b	-0.57454	3.60037	-4.50729	0.000419321	0.00480486	0.224301
Ccnd1	-0.574321	5.50014	-7.36964	2.18723e-06	0.000356883	5.19108
Tead2	-0.572331	1.56929	-3.15233	0.00650488	0.0292579	-2.18642
Fgfrl1	-0.571803	4.15239	-7.95874	8.54493e-07	0.000284782	5.95945
Il13ra1	-0.571768	3.14438	-4.08384	0.000967566	0.00815927	-0.533008
Id3	-0.571311	5.19403	-4.18406	0.00109998	0.00884048	-0.785043
Slc35d1	-0.569919	4.19171	-4.87734	0.000213124	0.00315104	0.839172
Bcar3	-0.569631	4.78545	-6.10333	2.0289e-05	0.000885258	3.05623
Tf	-0.568765	10.4395	-5.19548	0.000174861	0.00280637	0.919934
Parp10	-0.568608	3.00133	-3.71748	0.00209752	0.0136614	-1.22337
Pros1	-0.56846	4.40519	-4.81645	0.000255059	0.00351888	0.662598
Aldh2	-0.568306	6.8638	-5.55296	8.73128e-05	0.00188125	1.59855
Cklf	-0.567944	0.756253	-4.15647	0.000826431	0.0073804	-0.561643
Ckap2	-0.567458	0.569975	-3.1716	0.00625242	0.02857	-2.17193
Il17rd	-0.567228	5.60325	-6.96523	4.67545e-06	0.000491519	4.46132
Pamr1	-0.566795	5.56881	-8.23093	5.61749e-07	0.000267894	6.5011
Clec4a1	-0.566702	1.48361	-3.78302	0.0017746	0.0122458	-1.10624
LOC103694382	-0.56637	3.16637	-2.83042	0.0138314	0.0493295	-2.91378
Lsm6	-0.565654	3.77705	-7.6015	1.50287e-06	0.000330003	5.36106
Clybl	-0.564713	3.90701	-4.96924	0.00016507	0.00271368	1.08196
RGD1563941	-0.564704	1.09335	-4.06304	0.000999769	0.00830789	-0.671436
Ddr2	-0.563743	5.11417	-3.11646	0.00909116	0.0368554	-2.80032
Fam169b	-0.561917	1.4733	-3.03106	0.00834154	0.0347782	-2.39335
LOC103693323	-0.561782	1.13152	-4.40094	0.000503734	0.00543422	-0.119402
Loxl3	-0.561557	2.84777	-3.85888	0.00151853	0.0110326	-0.934622
Fbn1	-0.55807	4.74262	-3.26804	0.00653602	0.0293521	-2.44117
Igf1	-0.557687	4.7906	-4.13421	0.00113251	0.0090508	-0.780891
Gulp1	-0.557	3.96746	-3.43295	0.00429205	0.0220211	-1.94886
RGD1562114	-0.55682	2.10846	-5.29805	8.62769e-05	0.0018718	1.47213
Tnfsf13b	-0.556577	0.705604	-3.41814	0.00376334	0.0200933	-1.7627
Slc9a3r1	-0.555893	5.21446	-6.0714	2.31249e-05	0.000936389	2.92308
Fzd1	-0.554844	4.63918	-5.45355	7.01429e-05	0.00168678	1.87454
Atp1a1	-0.554638	9.80667	-6.27249	2.05591e-05	0.000888409	3.00085
Cpne2	-0.553701	4.7803	-3.45151	0.00454689	0.0228864	-2.10234
Pcdhgb4	-0.552908	2.09518	-4.56389	0.000363227	0.00436988	0.271988
Irf1	-0.552844	3.02423	-3.25216	0.00561374	0.0264303	-2.10402
Ddo	-0.552474	2.45657	-2.80794	0.0136981	0.0489654	-2.8448
Plp2	-0.55238	1.88039	-2.82667	0.0128808	0.0469101	-2.76405
Calr	-0.551698	8.87017	-5.62913	7.4084e-05	0.00173202	1.74354
Serinc5	-0.551397	7.95317	-7.49254	2.12908e-06	0.000354786	5.21151
Ly86	-0.549062	1.91245	-3.67895	0.00219836	0.0140492	-1.26658
Pcdhgc3	-0.54859	6.49709	-7.90066	9.35603e-07	0.000292509	6.01066
Myo1g	-0.548224	0.651407	-2.85543	0.0119345	0.0444359	-2.68346
Sox1	-0.54755	1.29503	-3.78522	0.00176662	0.0122282	-1.11481
Gsap	-0.547548	1.52725	-2.93037	0.0102464	0.040065	-2.56547
Cbs	-0.547526	6.94655	-4.40555	0.00079553	0.00719884	-0.576429
LOC108351685	-0.547139	0.569224	-3.29594	0.00484109	0.0239542	-1.96958
Marcks	-0.546846	7.29017	-7.90793	9.91252e-07	0.000292509	5.95569
Myzap	-0.545868	1.30734	-3.48155	0.00330209	0.018394	-1.62786
Acad11	-0.545851	4.68111	-6.95112	4.38416e-06	0.000476899	4.51304
Lrp10	-0.545433	5.88825	-5.65671	5.82855e-05	0.00153185	2.00524
Nusap1	-0.544319	0.433463	-2.88356	0.0112714	0.0426433	-2.64035
Olfml3	-0.543685	3.81995	-3.34365	0.00501962	0.0245787	-2.07938
Aif1	-0.542648	4.05072	-5.08756	0.000129434	0.00238805	1.30471
Slc2a9	-0.542535	1.22735	-3.36575	0.00419252	0.0216474	-1.82698
Zic4	-0.542501	4.13555	-3.66626	0.00265667	0.0159669	-1.52571
Marcksl1	-0.542447	5.34363	-6.57434	8.67826e-06	0.000629334	3.86029
Mmp15	-0.542324	6.07923	-6.68217	8.08862e-06	0.000611998	3.91893
Ttpa	-0.542112	1.99101	-2.84771	0.0123238	0.0454451	-2.73203
Stat5a	-0.541766	4.12773	-5.4515	6.44212e-05	0.00161193	1.96162
Limd2	-0.541117	4.78669	-5.29429	9.80042e-05	0.00199025	1.54764
Tlx3	-0.540918	1.85171	-3.97246	0.00120313	0.00943714	-0.759015
Kremen1	-0.540247	3.22638	-3.28495	0.0052817	0.025464	-2.06779
Etv1	-0.538964	5.6207	-6.2541	1.68685e-05	0.000833627	3.21383
Nuf2	-0.536952	0.913782	-3.72793	0.00198752	0.0131583	-1.23893
Mvp	-0.536408	4.91862	-5.19167	0.000123782	0.00230976	1.31778
Ggcx	-0.535886	4.82265	-4.76381	0.000294083	0.0038373	0.494646
Tmem140	-0.535388	1.59058	-2.89004	0.0111236	0.0422913	-2.6355
Rhpn2	-0.533876	4.7948	-6.45551	1.02995e-05	0.000677862	3.70108
Trim25	-0.533663	3.03703	-3.34268	0.00456657	0.0229559	-1.9249
Wls	-0.53314	7.47899	-2.98128	0.0122736	0.0453501	-3.26099
Rhbdf1	-0.533087	3.99992	-4.41526	0.000521415	0.00555231	0.00204572
Rhoc	-0.532779	5.26872	-7.39827	2.08742e-06	0.00035281	5.23527
Pdgfd	-0.532339	3.27438	-3.45864	0.00365725	0.0196999	-1.74173
Gpx8	-0.532166	4.00406	-4.0112	0.00123152	0.00956872	-0.80064
Rfx2	-0.531907	3.52927	-3.35032	0.00471874	0.0235097	-1.99525
LOC103690031	-0.531316	3.53368	-3.37737	0.00446232	0.022606	-1.94463
Padi2	-0.529819	7.38135	-6.19685	2.25165e-05	0.000933065	2.90084
Plekhd1	-0.529448	5.68398	-9.3037	1.17161e-07	0.000203912	7.99848
LOC108349515	-0.529342	1.05108	-3.71284	0.00205024	0.0134515	-1.25333
Cpt2	-0.529301	4.43608	-8.70196	2.77662e-07	0.000234327	7.03704
Fam20a	-0.528652	4.15186	-3.91586	0.00153794	0.0111426	-1.02181
Aldh3b2	-0.52856	0.823796	-3.36877	0.00416653	0.0215608	-1.83781
Epas1	-0.528324	7.59067	-7.40884	2.33086e-06	0.000362729	5.1181
Eva1b	-0.52824	2.70766	-4.03336	0.00106225	0.00865714	-0.616355
Hs3st3b1	-0.527663	1.65255	-2.84075	0.0122956	0.0453899	-2.72113
Trabd2b	-0.527236	1.97867	-3.27837	0.00501942	0.0245787	-1.96985
Smim5	-0.526141	2.40518	-4.70835	0.000272414	0.00365367	0.551894
Fam117a	-0.525922	3.27225	-4.82726	0.000215335	0.0031612	0.830989
Hddc3	-0.525726	4.98259	-6.68296	6.93059e-06	0.000568381	4.08042
Itgb3	-0.525021	0.713498	-3.31758	0.00462999	0.0232003	-1.92728
Dctd	-0.524991	2.6456	-5.59439	4.92143e-05	0.00138401	2.0509
Rlbp1	-0.524636	5.07634	-6.92957	4.54687e-06	0.00049084	4.48555
Slc22a5	-0.523836	4.22398	-4.30044	0.000686009	0.00658904	-0.270873
Adam12	-0.523564	3.19617	-3.35069	0.00453673	0.022872	-1.93134
Marveld2	-0.523416	1.42632	-2.7924	0.0135617	0.0485999	-2.79587
Dnah5	-0.52207	3.56105	-3.17872	0.00675185	0.0299013	-2.32588
Ctxn3	-0.521904	2.72952	-3.58672	0.00265843	0.0159669	-1.43093
Pyroxd2	-0.521902	4.03609	-3.15456	0.00753141	0.0323211	-2.48352
C1rl	-0.521101	0.979211	-3.44276	0.00357707	0.0194418	-1.70752
Ctxn1	-0.520958	5.86793	-3.61011	0.00349573	0.0191258	-1.97321
Chrnb4	-0.519531	2.6795	-3.33003	0.00452565	0.0228309	-1.90017
Aqp9	-0.519301	4.10431	-6.78398	5.82575e-06	0.000533653	4.20426
Acp5	-0.519184	0.503715	-3.0505	0.00801596	0.0337891	-2.37042
Gtse1	-0.518971	2.62552	-4.1051	0.000917569	0.00788287	-0.488832
Cmtm3	-0.51834	2.3644	-2.97029	0.00957798	0.0382728	-2.53648
LOC100360828	-0.518323	0.999985	-3.31069	0.00469617	0.0234345	-1.92703
S100a4	-0.517852	1.52666	-3.2732	0.00507311	0.0247787	-1.97874
Dnah5_1	-0.517775	4.24823	-3.45452	0.00410753	0.021404	-1.9513
Pccb	-0.517412	5.21718	-6.67012	7.08602e-06	0.000575106	4.0559
Ptgs1	-0.517385	2.86861	-4.78409	0.000234483	0.00332092	0.729147
Pdzrn3	-0.517303	4.85898	-4.19436	0.000950283	0.00804607	-0.633402
Iqcd	-0.516748	3.29615	-3.91532	0.00135251	0.0102137	-0.84664
Mcm5	-0.515969	1.67065	-3.4148	0.00378931	0.0201479	-1.73239
Acaa2	-0.515899	5.39506	-7.20892	2.84882e-06	0.000413185	4.93578
Cdon	-0.515486	4.97239	-5.62207	4.99988e-05	0.00139604	2.17909
LOC108351027	-0.515271	3.35225	-3.28005	0.00531831	0.02554	-2.08929
Zic2	-0.514991	5.11085	-3.31278	0.00597481	0.027681	-2.41246
Tnfaip8l2	-0.514959	2.20945	-3.92076	0.00133752	0.0101359	-0.831308
Atp10d	-0.514834	3.80724	-3.33205	0.00500302	0.0245204	-2.08223
Pycard	-0.51419	1.40888	-3.42789	0.0036884	0.0198199	-1.71579
Chst7	-0.513858	2.47229	-3.16559	0.00633007	0.0287404	-2.18533
Fyb	-0.513844	2.77663	-2.91849	0.0108951	0.0417059	-2.67502
Pmp2	-0.513813	1.17303	-3.34033	0.00441798	0.0224613	-1.87157
Cyp7b1	-0.513482	4.69271	-5.36289	7.96172e-05	0.00181525	1.74258
Rassf10	-0.513341	1.80425	-4.13824	0.000857667	0.00756447	-0.477932
Tspan11	-0.513265	2.96993	-4.60887	0.000332026	0.00412792	0.427005
Cd180	-0.512975	2.60929	-3.84625	0.00155843	0.0112494	-0.956032
Tst	-0.512458	6.00274	-8.0399	7.53311e-07	0.000272621	6.22395
Ticam2	-0.511616	1.02345	-3.02908	0.0083753	0.0348726	-2.39628
Nat6	-0.510882	4.98579	-4.31156	0.000749536	0.00694718	-0.419927
Pign	-0.509018	4.55963	-5.72632	3.84742e-05	0.00121009	2.4422
Glmp	-0.508495	5.00451	-5.89389	2.8342e-05	0.00104952	2.71919
Boc	-0.508431	4.88421	-4.89044	0.000218356	0.00318467	0.767671
Apod	-0.50812	8.77233	-4.55421	0.000568932	0.0058476	-0.271945
Rfx4	-0.506069	5.42332	-4.94309	0.000212859	0.00315104	0.758034
Spi1	-0.503501	2.54683	-3.82128	0.00164043	0.011627	-1.00146
Itpripl2	-0.503201	1.50575	-4.55646	0.000368662	0.00441135	0.185186
Fcgrt	-0.502397	4.98362	-4.31496	0.000732643	0.00686781	-0.401192
Tph2	-0.502199	3.89352	-2.86036	0.0133602	0.0480981	-2.99287
Cyp51	-0.502017	8.45453	-4.61857	0.000495689	0.00536962	-0.140322
S100a16	-0.501646	6.50397	-7.13938	3.24239e-06	0.000439671	4.79081
Fam19a4	-0.501093	1.93248	-3.69349	0.00213357	0.0138063	-1.24051
LOC103693391	-0.500819	2.59877	-5.19262	0.000105639	0.00208009	1.39039
LOC108352894	-0.50036	2.00031	-4.10229	0.000922846	0.00790717	-0.525195
Nde1	-0.500328	3.33433	-4.79951	0.000227452	0.00326564	0.783388
Chrna3	-0.50028	3.50649	-3.60321	0.00267763	0.0160085	-1.48323
Prrg2	-0.499783	1.33563	-3.02347	0.00847208	0.0351474	-2.40524
Clec14a	-0.499642	2.96896	-3.58765	0.00265337	0.0159549	-1.44008
Stxbp2	-0.499247	2.75967	-3.31143	0.00468901	0.0234137	-1.93706
Dusp19	-0.499164	3.94611	-4.95547	0.000167416	0.00273534	1.06553
Btbd17	-0.499155	3.87328	-6.17022	1.70989e-05	0.000839615	3.18855
Arhgdib	-0.498721	3.77842	-4.13876	0.000877293	0.00768447	-0.476016
Veph1	-0.498695	1.25785	-2.82851	0.0126049	0.0462178	-2.73166
Olfml2b	-0.498317	4.2152	-4.24368	0.000746729	0.00693654	-0.356751
Pik3cg	-0.498271	3.21146	-4.27352	0.000651625	0.00638739	-0.176529
Tmem238	-0.497848	2.135	-4.05767	0.00101078	0.00835511	-0.59437
Pkib	-0.497124	2.81569	-4.13484	0.000863626	0.00760495	-0.430877
Aldh7a1	-0.496654	6.5049	-6.53608	1.01222e-05	0.000675084	3.6805
Tecta	-0.496615	4.25839	-5.78588	3.44541e-05	0.00115791	2.55222
Tmem35b	-0.496058	1.10836	-3.43261	0.00365274	0.0196886	-1.71859
Cd93	-0.495816	3.34688	-3.06857	0.00820385	0.0343511	-2.48228
Ptpro	-0.495807	5.1331	-4.6738	0.000350384	0.00427447	0.293309
Sp7	-0.495478	2.65913	-3.43328	0.00364767	0.019685	-1.70889
Plod3	-0.494783	5.1889	-5.59375	5.31751e-05	0.00144106	2.10679
Nnt	-0.494532	6.53583	-6.15049	2.13881e-05	0.000910391	2.94878
Rhoj	-0.494514	3.41749	-3.88689	0.0014337	0.0105832	-0.908248
LOC102556526	-0.494255	0.904887	-2.8396	0.0123245	0.0454451	-2.7092
Zfp423	-0.494032	5.63463	-7.11032	3.35595e-06	0.000440873	4.77404
RGD1559821	-0.493085	0.86563	-3.2275	0.00557351	0.0263163	-2.06989
Cyb5r2	-0.493072	3.7498	-4.4275	0.000477503	0.00524884	0.091108
Pld1	-0.492894	5.33438	-6.60035	7.99653e-06	0.000611998	3.93573
Slc25a30	-0.49187	4.95732	-3.46467	0.00425621	0.0218875	-2.07813
Kif7	-0.491858	3.67027	-5.06165	0.000136111	0.00246194	1.26202
Gas7	-0.491704	6.21746	-4.23257	0.000996559	0.00830744	-0.787882
Gal3st4	-0.49071	3.24298	-4.35883	0.000548379	0.00571131	-0.0197206
Ednrb	-0.490658	8.6683	-8.14841	6.37311e-07	0.000267894	6.38164
Nf1x	-0.490409	7.16028	-9.46742	9.32894e-08	0.000182661	8.25408
Timp1	-0.490296	2.77393	-2.96931	0.0096732	0.0385078	-2.57439
Man1c1	-0.49007	5.42435	-5.72207	4.25999e-05	0.00128152	2.31116
LOC308990	-0.489882	1.54252	-3.0856	0.00745959	0.032092	-2.30079
Acy1	-0.489259	6.17718	-5.66639	5.28631e-05	0.00143682	2.07224
Tiparp	-0.489178	4.73067	-5.09304	0.000134628	0.00244002	1.2335
Glis3	-0.488979	2.23735	-2.90868	0.0107094	0.0412402	-2.62922
Prdx6	-0.488385	7.82241	-10.3031	3.04493e-08	0.000161803	9.33345
RGD1560314	-0.488338	0.872098	-3.12982	0.00681264	0.0300347	-2.23142
Nckap1l	-0.488208	4.3768	-4.11205	0.00100456	0.00832121	-0.651895
Pnlip	-0.488172	3.40596	-4.02437	0.00108194	0.00874937	-0.648118
Kcnk5	-0.488128	1.59593	-3.50833	0.00312472	0.0177275	-1.57225
Rcn3	-0.487496	4.02428	-3.62844	0.00267358	0.0159904	-1.53448
Heg1	-0.487026	6.61701	-4.42124	0.000694899	0.006645	-0.455303
Cd6	-0.486036	1.10894	-3.59109	0.00263459	0.0158785	-1.45264
Flnc	-0.48584	6.28201	-4.75875	0.00033951	0.00418417	0.255293
C1qtnf6	-0.484795	1.3058	-3.13469	0.00674495	0.0298877	-2.21698
Ror2	-0.484697	2.1305	-2.89606	0.0109882	0.0419679	-2.6455
Antxr1	-0.484513	5.00214	-2.89718	0.0132365	0.0477402	-3.15823
Klhdc8b	-0.483409	4.92071	-3.52662	0.00371539	0.0199103	-1.94649
Ascl1	-0.483318	1.79658	-3.26418	0.00516825	0.0250714	-1.99348
Tmco4	-0.481992	2.63953	-3.7977	0.00172186	0.0120353	-1.04412
Szrd1	-0.481934	6.06945	-6.31548	1.41741e-05	0.000781771	3.35616
Abhd14b	-0.481015	5.03565	-5.01371	0.000164211	0.00270473	1.02279
Atoh8	-0.480718	2.38963	-3.32309	0.00457775	0.0229989	-1.89868
Gapt	-0.479541	0.596423	-3.14552	0.00659658	0.029519	-2.21339
Gas1	-0.47896	4.60988	-4.72407	0.000282206	0.00373666	0.532458
Rras2	-0.47894	4.03443	-5.02171	0.000147109	0.00254621	1.18424
Dhrs3	-0.478772	4.42506	-4.92157	0.000178903	0.00283637	0.975168
Adrb2	-0.478552	1.76662	-3.35169	0.00431577	0.0220923	-1.84101
Suclg2	-0.478438	6.7104	-6.95846	4.33015e-06	0.000475239	4.49942
Aqp4	-0.477999	10.7338	-6.5205	1.00823e-05	0.000675084	3.67599
Acsbg1	-0.476725	8.67785	-9.01404	1.7659e-07	0.000234327	7.637
Fam83f	-0.476638	1.07721	-3.66571	0.00225914	0.0142921	-1.32988
LOC103695056	-0.476357	1.99801	-2.79423	0.0135115	0.0484644	-2.81512
Casq2	-0.476235	1.3854	-3.14623	0.00658687	0.0294959	-2.19695
Npc2	-0.475993	6.74009	-7.05561	3.67735e-06	0.000447214	4.66046
Ttc30a1	-0.475845	2.09651	-3.41797	0.00376468	0.0200933	-1.72417
RGD1309821	-0.475242	5.78847	-6.02108	2.38564e-05	0.000947292	2.85508
Tmem176b	-0.475201	6.18974	-5.22545	0.000124949	0.00232023	1.2271
Rell1	-0.474958	3.41947	-5.24021	9.63952e-05	0.00197635	1.56918
Asrgl1	-0.474065	6.48635	-6.38125	1.28496e-05	0.00075103	3.4404
Ngb	-0.47397	4.45991	-4.38107	0.000560831	0.00578713	-0.112187
Dpy19l3	-0.473832	7.27229	-6.56711	9.47826e-06	0.000655704	3.72961
Sqrdl	-0.472777	3.16048	-4.6864	0.000284546	0.00374863	0.574383
Myo1f	-0.472464	3.06546	-5.00965	0.000150608	0.00258462	1.13952
Ttc12	-0.472355	3.2404	-3.57218	0.00273932	0.0162396	-1.48826
Slc24a1	-0.472209	1.71883	-3.62316	0.00246612	0.0151666	-1.36979
Adamts14	-0.471945	0.616624	-3.14086	0.00665996	0.0296368	-2.22031
Parp9	-0.47182	3.89851	-2.91849	0.0116148	0.0435769	-2.87395
LOC100909539	-0.471587	1.92206	-3.23975	0.00543472	0.0259284	-2.03708
Rrbp1	-0.47117	7.46785	-8.13593	6.4964e-07	0.000267894	6.36354
Prlhr	-0.470728	4.17746	-3.40406	0.00431475	0.0220923	-2.00197
Lix1	-0.470436	5.27849	-6.0404	2.16152e-05	0.000917562	2.969
Ptpn6	-0.469932	3.31341	-4.57952	0.000352059	0.00428416	0.384535
Arhgap28	-0.469559	1.74597	-3.09981	0.00724542	0.0314209	-2.27866
Esr1	-0.469417	2.42796	-3.15985	0.00640522	0.0289724	-2.19341
Mamdc2	-0.469391	2.01464	-2.88902	0.0111468	0.042368	-2.65218
Acss3	-0.468551	4.7221	-4.23687	0.000788381	0.00716096	-0.459734
Fancl	-0.468186	2.73846	-3.13217	0.00677983	0.029966	-2.26294
LOC100909405	-0.467983	2.98897	-4.30009	0.0006175	0.0061687	-0.128147
Zfp36l1	-0.467621	5.81069	-3.46801	0.00442479	0.0224741	-2.20925
Ncan	-0.467572	6.46353	-8.64211	3.03228e-07	0.000234327	7.10873
Nckap5	-0.467063	2.36687	-3.97974	0.00118534	0.00935847	-0.72109
Ripk3	-0.466754	0.562555	-3.00364	0.00882281	0.036112	-2.44478
Nfam1	-0.466501	3.35425	-4.51121	0.000403617	0.00468548	0.259606
Susd5	-0.466472	3.3072	-4.54196	0.000379508	0.00448989	0.315953
Ptpn13	-0.466408	5.24555	-3.41946	0.00467829	0.0233751	-2.20788
LOC100362384	-0.466262	2.06394	-3.15134	0.00651818	0.029297	-2.19509
Emilin1	-0.46602	3.78325	-4.04536	0.00103653	0.00852076	-0.637621
Icoslg	-0.465992	4.4446	-3.51979	0.00347717	0.0190753	-1.83457
Sp110	-0.465934	3.06988	-2.87907	0.0117591	0.0439709	-2.7773
Lamb2	-0.465885	6.77174	-2.92592	0.0131586	0.0475688	-3.3212
Gpr84	-0.465374	1.90176	-4.03838	0.0010514	0.0086001	-0.642014
Hexa	-0.465325	5.92538	-4.82268	0.000270278	0.00364093	0.483203
LOC103693676	-0.464711	4.74842	-3.97571	0.00136907	0.0103035	-0.989041
Mgst1	-0.464419	5.15791	-5.80298	3.33822e-05	0.0011442	2.55131
Tmem176a	-0.464076	4.94092	-4.42542	0.000543408	0.005686	-0.123977
Oaf	-0.46381	3.53913	-5.13909	0.000117138	0.0022431	1.3973
Nqo2	-0.4634	3.95193	-3.56966	0.00294099	0.0169741	-1.62042
Tyrobp	-0.463333	3.30573	-4.37986	0.000525598	0.00557411	0.0183593
Lrrc8d	-0.462353	5.94049	-8.9071	2.05956e-07	0.000234327	7.47353
LOC102547478	-0.462052	4.84815	-3.55829	0.00335699	0.0186138	-1.85001
Pxylp1	-0.462014	3.50876	-3.06607	0.00817681	0.0342831	-2.505
LOC102555570	-0.46149	0.820147	-2.98144	0.00923237	0.0372146	-2.47687
Slc25a18	-0.461249	7.12887	-6.84218	5.27441e-06	0.000501507	4.29775
Tnfrsf19	-0.460917	4.04498	-5.75742	3.63173e-05	0.00117296	2.49981
Kcnq4	-0.460899	3.12192	-3.80441	0.00169829	0.0119025	-1.04491
Emid1	-0.460684	4.50398	-4.57104	0.000372274	0.00443107	0.27098
Atp6v0e1	-0.459748	4.77996	-6.07009	2.04827e-05	0.000888409	3.04094
Slc20a2	-0.459416	7.41192	-6.52463	9.86469e-06	0.000671829	3.68386
LOC102554253	-0.459151	2.43834	-3.21563	0.0057113	0.0267689	-2.09372
Echdc3	-0.459113	0.55759	-2.98014	0.00925678	0.0373034	-2.4829
Bmp4	-0.45879	3.78142	-3.36984	0.0044016	0.0224217	-1.97413
Ccdc8	-0.458761	3.24636	-5.46473	6.28271e-05	0.0015873	1.93939
Ier5	-0.458681	4.17608	-4.65122	0.000305164	0.00391811	0.483911
Ccnd2	-0.458664	3.87506	-3.74097	0.00201223	0.0132826	-1.26125
Clic1	-0.458544	4.20969	-3.71858	0.00219643	0.0140478	-1.37846
Il7r	-0.458518	2.43012	-3.9055	0.00138004	0.0103529	-0.851692
RGD1561282	-0.458411	0.37882	-2.84468	0.0121979	0.0451485	-2.70306
Dhcr7	-0.457406	5.3325	-4.85684	0.000230788	0.00328343	0.670181
Steap4	-0.457277	1.70389	-3.07581	0.00761085	0.0325995	-2.31951
Fads2	-0.456903	7.12499	-6.85047	5.20042e-06	0.000501507	4.3118
Efnb3	-0.456024	7.2411	-2.95999	0.0123311	0.0454588	-3.27484
Stxbp4	-0.455822	4.9027	-3.16722	0.00751889	0.0323028	-2.6201
Vamp8	-0.454874	3.83164	-3.76009	0.00191202	0.0128568	-1.21082
Acsf3	-0.454708	4.64966	-5.33783	7.99618e-05	0.00181525	1.73427
Lyrm5	-0.453767	3.71746	-3.43447	0.00378035	0.0201276	-1.82903
Evc2	-0.453665	2.80942	-4.09466	0.000937303	0.00797497	-0.503859
Pard3b	-0.453384	2.65021	-5.08607	0.000129807	0.0023907	1.22103
Zbtb20	-0.453345	5.06246	-4.15789	0.000956195	0.00808738	-0.679781
Laptm4a	-0.452595	8.21617	-6.18604	1.87191e-05	0.000864945	3.0492
Eci3	-0.452484	2.50385	-2.95584	0.00972771	0.0386542	-2.56284
Mxd4	-0.451765	6.41434	-5.47701	7.26439e-05	0.00171166	1.74003
Dock1	-0.451502	6.60163	-6.27229	1.50805e-05	0.000808973	3.27353
Pax3	-0.451276	2.64581	-3.44901	0.00353127	0.0192494	-1.67967
Rnaset2	-0.450053	5.54398	-5.38354	7.91124e-05	0.00181172	1.69313
Necap2	-0.448832	5.37674	-5.00135	0.000167466	0.00273534	0.972953
Ston1	-0.447454	3.99277	-3.51699	0.00325857	0.0182098	-1.72403
Plxnb2	-0.447157	7.04219	-2.96391	0.0121683	0.0450815	-3.25898
Ddc	-0.446843	5.29852	-3.77198	0.0022141	0.0141112	-1.50607
Fut2	-0.446173	0.796657	-3.14059	0.00666371	0.0296451	-2.21546
Ddx58	-0.445944	3.71798	-2.86618	0.0124878	0.0459174	-2.91987
Cat	-0.445107	6.92056	-6.39949	1.17711e-05	0.000715668	3.50871
Dock6	-0.444607	4.58624	-3.56459	0.00313862	0.0177754	-1.7622
Acy3	-0.444513	2.81759	-3.64161	0.00237414	0.0147807	-1.33336
Gper1	-0.444477	2.61739	-4.14253	0.000850199	0.00751553	-0.421942
Tor3a	-0.444227	3.50657	-4.95621	0.000167173	0.00273534	1.06966
LOC100909490	-0.444045	2.85084	-3.48288	0.00329308	0.0183504	-1.62742
LOC684327_1	-0.443983	3.37294	-4.47148	0.000437101	0.00491511	0.186394
Chi3l1	-0.442632	6.42186	-6.10292	2.02826e-05	0.000885258	2.98452
LOC103694042	-0.44218	5.24598	-3.64252	0.0028684	0.0167283	-1.75005
Gria1	-0.442072	7.13337	-5.09274	0.000161175	0.00267641	0.938629
Irf5	-0.442067	3.27097	-5.1597	0.000112565	0.00218336	1.41804
Pygm	-0.441749	7.66272	-7.39613	2.0947e-06	0.00035281	5.20881
Inpp5d	-0.44167	4.04819	-4.99339	0.000155461	0.00261562	1.13143
Clu	-0.441531	10.0271	-4.60306	0.000444859	0.00498802	-0.0492172
Scpep1	-0.44119	5.31638	-5.57627	5.09156e-05	0.0014066	2.1289
Calb1	-0.440682	6.43986	-4.43178	0.000615907	0.0061687	-0.3506
Smim3	-0.440618	3.52286	-3.09753	0.00755601	0.0324089	-2.43953
Dock2	-0.440155	3.33654	-4.64571	0.000308526	0.00394189	0.505307
Ltbr	-0.439913	5.01842	-6.35042	1.23978e-05	0.000739634	3.51889
Abcd1	-0.439855	4.21288	-5.08072	0.000131161	0.00240013	1.28505
Serf2	-0.439695	6.71801	-6.04466	2.31347e-05	0.000936389	2.84836
Limd1	-0.439309	4.12766	-6.71211	6.59095e-06	0.000558435	4.09365
Psd2	-0.439286	7.84231	-8.25648	5.4031e-07	0.000267894	6.54384
Cdk1	-0.438552	0.487169	-3.01131	0.0086854	0.0357269	-2.43409
Pragmin	-0.438044	4.10965	-5.20078	0.000103992	0.00207224	1.50938
Hopx	-0.437366	5.62109	-5.93953	2.59742e-05	0.000996281	2.77097
LOC102552676	-0.435665	1.53209	-2.78383	0.0137991	0.0492591	-2.81355
Kcnk13	-0.435552	1.76139	-3.86873	0.00148813	0.0108762	-0.943032
Rps27l	-0.434895	3.20553	-3.88874	0.00142828	0.0105527	-0.891681
Slc7a11	-0.434453	8.67015	-3.23743	0.00710203	0.0309706	-2.75815
Cib1	-0.433984	3.93078	-3.99998	0.00113726	0.00907553	-0.740155
Fanci	-0.433747	1.42052	-3.10474	0.00717244	0.0311908	-2.26756
Nek8	-0.432475	2.54784	-3.02469	0.00845094	0.0351171	-2.44292
Pald1	-0.432423	4.55321	-4.19218	0.000808863	0.0072812	-0.478346
RGD1562378	-0.432047	2.06089	-2.81306	0.013006	0.0472442	-2.78597
B2m	-0.431396	8.44007	-4.40667	0.000665881	0.00648654	-0.458636
Fjx1	-0.431356	5.9508	-3.81053	0.00213548	0.013811	-1.53028
G0s2	-0.430726	2.36817	-3.66717	0.00225236	0.0142607	-1.2797
Kank4	-0.430521	4.7238	-5.97327	2.44225e-05	0.000957044	2.8732
Pdlim4	-0.430442	5.34783	-5.60559	4.8192e-05	0.00136607	2.1806
Zbtb7c	-0.430213	3.63588	-4.53222	0.000386985	0.00455086	0.292437
Tsku	-0.430194	3.15305	-3.73976	0.00193974	0.0129902	-1.16752
Cpne5	-0.42992	5.60359	-4.06437	0.00120259	0.00943714	-0.953579
Inppl1	-0.429891	6.35135	-7.0045	4.00689e-06	0.000457525	4.58355
Pla2g7	-0.429001	6.14538	-3.64327	0.00302733	0.017294	-1.88268
Fbxl7	-0.428745	3.42882	-4.20026	0.000756029	0.00697846	-0.31915
Cdk2ap2	-0.428484	4.20386	-6.06726	2.05881e-05	0.000888409	3.0368
Chsy1	-0.427611	4.53469	-2.98238	0.0104391	0.0405851	-2.88265
Eml1	-0.427289	6.8862	-4.6535	0.000384698	0.00453076	0.0866457
RT1-A1	-0.427018	2.86485	-2.90164	0.0108641	0.0416483	-2.69299
Gc	-0.426798	1.19327	-2.93679	0.0101133	0.0397028	-2.55015
Arhgap45	-0.426092	3.49486	-3.66152	0.00227874	0.0143928	-1.34302
LOC103689966	-0.423982	1.29045	-3.29711	0.00482941	0.0239241	-1.94157
Syk	-0.423576	2.89293	-3.07253	0.00766226	0.0327355	-2.38535
Dchs1	-0.423473	5.93761	-5.46134	6.68773e-05	0.00163938	1.82853
LOC102550580	-0.423364	2.06074	-3.21953	0.0056656	0.0266105	-2.0748
Cdkn2c	-0.423318	0.928436	-3.03427	0.00828688	0.0345872	-2.38857
Stom	-0.422547	4.19823	-3.35212	0.00461471	0.0231311	-2.08014
LOC100362724	-0.422241	0.37712	-2.98783	0.00911256	0.0369217	-2.47456
Pttg1ip	-0.421525	6.78094	-5.13683	0.000139289	0.00249025	1.08073
Cebpa	-0.420983	2.96533	-3.02112	0.00851297	0.0352616	-2.48678
Adam17	-0.420767	5.34399	-5.5637	5.21324e-05	0.00142828	2.10378
Qprt	-0.420509	2.7735	-4.74412	0.00025377	0.00351516	0.651378
Galm	-0.420127	4.17719	-3.88022	0.00148445	0.0108606	-1.01748
Lat2	-0.419846	2.38232	-4.70831	0.000272439	0.00365367	0.549043
Stbd1	-0.419473	1.95432	-3.22205	0.00563628	0.0265205	-2.06856
Arhgap42	-0.419443	4.14379	-3.36689	0.0044446	0.0225454	-2.03824
Tifab	-0.419408	3.18281	-3.79991	0.00171408	0.0119863	-1.05673
Dtx4	-0.419382	5.46755	-6.98137	4.16598e-06	0.000463583	4.56647
Trim5	-0.419167	4.20472	-3.37169	0.00442272	0.0224708	-2.04189
LOC685431	-0.419042	3.75028	-3.78109	0.00178167	0.0122727	-1.14178
Adgra2	-0.418406	5.56088	-2.98923	0.0109109	0.041736	-3.06046
Cryab	-0.417774	5.98264	-3.47206	0.00419736	0.0216559	-2.18949
Slc25a43	-0.417753	0.733162	-3.57912	0.00270044	0.0160713	-1.49694
Aldh4a1	-0.417752	5.22684	-5.43072	6.70083e-05	0.00164003	1.86605
Cd9	-0.417298	7.14351	-6.09185	2.01948e-05	0.000885258	2.96681
Ildr2	-0.417003	5.09277	-3.84149	0.0017813	0.0122727	-1.29062
Baalc	-0.416831	6.94632	-6.1345	1.82339e-05	0.000857703	3.06804
Csf1r	-0.416769	6.96003	-5.56194	5.7916e-05	0.00152727	1.9347
Bri3bp	-0.416609	2.79363	-4.34078	0.000568733	0.0058476	-0.0601046
Decr1	-0.416584	4.88476	-4.47129	0.000456174	0.00506867	0.0343299
Wdpcp	-0.41656	3.02956	-4.41363	0.000491028	0.00533759	0.0786682
Abi3	-0.416435	2.37097	-3.46267	0.00343321	0.0188893	-1.64721
Dbi	-0.416412	8.12366	-5.35553	9.06694e-05	0.00190893	1.48668
Ybey	-0.416322	1.97	-4.48243	0.000427603	0.00485712	0.12111
Col11a1	-0.416254	5.71299	-3.04421	0.00983429	0.0389788	-2.97849
LOC103692066	-0.415962	4.60069	-3.88612	0.00153306	0.0111227	-1.09503
Rbm38	-0.415477	2.58728	-3.96685	0.00121701	0.00949366	-0.738346
Erp29	-0.415208	6.16303	-7.0679	3.60247e-06	0.000447214	4.69281
Gjc2	-0.415196	6.54703	-2.89483	0.0135374	0.0485353	-3.34871
Pcdhgb7	-0.414755	3.40062	-5.15826	0.000112879	0.00218559	1.42455
Gnat2	-0.414199	2.27585	-2.96807	0.00948796	0.0379906	-2.52682
Cyb561a3	-0.413948	3.64242	-3.43715	0.00361864	0.0195794	-1.78863
Slco3a1	-0.413926	5.93362	-4.2681	0.000783565	0.00714422	-0.57073
Dnaaf5	-0.41375	3.62043	-3.45022	0.00352249	0.0192319	-1.7608
Adgrg2	-0.413412	3.54572	-3.66583	0.0022586	0.0142921	-1.34013
Tp53i3	-0.413393	2.47481	-3.5684	0.00276074	0.0163309	-1.45821
Tapbpl	-0.413282	4.18019	-3.64484	0.00244673	0.015077	-1.48777
Gpc6	-0.413256	3.76061	-4.06151	0.00100289	0.00832121	-0.60493
Fas	-0.413065	1.61299	-3.11969	0.00695578	0.0304429	-2.24282
Lrp5	-0.412743	4.74877	-4.19192	0.00080928	0.0072812	-0.502973
Cacng5	-0.412596	5.75628	-3.29936	0.00586575	0.027301	-2.49234
Axl	-0.41168	5.76903	-5.65931	4.35861e-05	0.00129747	2.25234
Cfh	-0.411534	6.0685	-3.15807	0.007928	0.0335377	-2.80669
Msi1	-0.411432	5.07914	-6.40414	1.12744e-05	0.000703715	3.60912
Cth	-0.411248	1.24088	-3.18287	0.00610924	0.0280878	-2.13602
Sh3bgr	-0.410742	2.70117	-3.74138	0.00193329	0.0129736	-1.14737
Ost4	-0.41042	5.1237	-5.26893	9.12263e-05	0.00191551	1.57204
RGD1563354	-0.410415	2.7544	-3.09608	0.00730108	0.0316066	-2.32997
S100a1	-0.408408	5.02169	-4.65867	0.000307298	0.00393582	0.399876
Gltp	-0.407769	6.49	-4.01377	0.00139069	0.010388	-1.15799
Nbl1	-0.406841	6.52393	-3.78481	0.00224797	0.0142444	-1.62381
Tmem267	-0.406772	2.06796	-3.31426	0.00466181	0.0233225	-1.90757
Dmpk	-0.406153	6.28755	-5.28847	9.55529e-05	0.00196681	1.45979
Cd302	-0.405731	5.60476	-5.75142	3.6724e-05	0.00117466	2.43118
Slc2a5	-0.405517	2.92946	-3.57929	0.00269947	0.0160713	-1.45357
Plcd4	-0.405432	5.87598	-6.10456	1.92455e-05	0.000868766	3.05286
Nrp2	-0.405074	6.32185	-3.92034	0.00166457	0.0117449	-1.32529
Spidr	-0.405018	2.44168	-2.85109	0.0120402	0.044755	-2.74397
Lmf2	-0.403045	5.14867	-5.04516	0.000140545	0.00249375	1.14759
Sh3pxd2b	-0.402769	4.67271	-4.30883	0.00061403	0.0061576	-0.235784
Cecr5	-0.402467	3.94239	-4.64075	0.000311592	0.00396856	0.480222
Lrrk1	-0.402138	3.7536	-4.10396	0.000919701	0.00788949	-0.523263
Acot2	-0.401896	3.59001	-5.12353	0.000120719	0.00228098	1.3714
Il17ra	-0.401609	4.61605	-5.87097	2.94521e-05	0.00107039	2.69638
Lsp1	-0.401452	3.25703	-2.8884	0.0112734	0.0426433	-2.77257
Banf1	-0.401174	5.41515	-5.645	4.47667e-05	0.0013107	2.24839
Nkd1	-0.40107	6.09993	-4.87249	0.000218192	0.00318467	0.657999
Slit2	-0.400846	6.70781	-4.03294	0.00133508	0.0101263	-1.12974
Plpp4	-0.400606	4.73646	-4.58263	0.000349879	0.00427163	0.298897
Plek	-0.400422	2.94849	-3.26942	0.00511276	0.0248947	-2.02855
Lhfpl2	-0.399568	5.91669	-5.92615	2.66181e-05	0.00100712	2.73072
Cdca7	-0.39886	0.876804	-3.03706	0.00823974	0.0344363	-2.38461
Atp1b2	-0.398765	10.3512	-6.34948	1.24185e-05	0.000739634	3.45268
Rin3	-0.3984	3.42243	-3.47584	0.00334122	0.0185592	-1.68835
Akt2	-0.398321	5.98405	-5.75741	3.63181e-05	0.00117296	2.42006
Selplg	-0.397829	5.09609	-6.02529	2.22163e-05	0.000928911	2.9505
Cryl1	-0.397714	3.47202	-4.43621	0.000469213	0.00518684	0.119196
Sh3bgrl	-0.397339	7.42708	-5.37583	8.18201e-05	0.0018381	1.58196
Maf	-0.396857	5.63022	-4.12808	0.000998721	0.00830744	-0.789302
Fam89a	-0.395721	2.23542	-3.13091	0.00679741	0.0300129	-2.23667
Bace2	-0.395556	3.32809	-3.45979	0.00345361	0.0189749	-1.70864
Kcnj16	-0.395318	6.96551	-8.20672	5.82887e-07	0.000267894	6.47132
Rbpjl	-0.394727	2.6458	-3.25939	0.00521947	0.0252261	-2.02522
Cpt1a	-0.39424	6.27762	-6.37191	1.19349e-05	0.000721808	3.50765
Arid5a	-0.394062	3.55188	-3.22808	0.00556679	0.0263121	-2.17456
Cyp2t1	-0.394059	2.67877	-4.05641	0.0010134	0.00837232	-0.575135
Dnmbp	-0.392586	3.92792	-4.50713	0.000406929	0.00471112	0.229374
Sdf2l1	-0.391568	3.95363	-3.59665	0.00260459	0.015734	-1.52401
Cdh11	-0.391373	6.13765	-3.47006	0.00413536	0.0214613	-2.19517
Gstm1	-0.390865	6.86923	-4.2993	0.000747888	0.00693654	-0.577655
Cd33	-0.390789	2.85776	-2.99239	0.00902798	0.0367119	-2.52798
Itgb5	-0.390424	6.52359	-5.64864	4.44635e-05	0.00130426	2.19346
Tcf7l1	-0.390366	3.58893	-4.41298	0.000491665	0.0053408	0.0717712
Polr3k	-0.390078	5.31734	-5.12449	0.000120495	0.0022795	1.28409
Sdr42e1	-0.390071	2.32945	-3.59354	0.00262135	0.0158109	-1.41181
Myo10	-0.389928	6.39918	-7.72024	1.24346e-06	0.000309782	5.73278
Magee2	-0.389439	2.5731	-2.94146	0.0100174	0.039489	-2.59383
Rai2	-0.38939	3.72237	-4.31148	0.000603425	0.00608632	-0.126514
Pxmp4	-0.388627	3.61806	-4.33105	0.000580024	0.00593048	-0.0832658
Apex2	-0.388552	2.47764	-3.64346	0.00236509	0.0147639	-1.32262
Tmem123	-0.38826	4.74527	-3.57516	0.00293528	0.0169509	-1.73521
Mrps17	-0.387407	4.27007	-5.76026	3.61268e-05	0.00117296	2.50734
Ust	-0.387403	5.41244	-4.01426	0.00122338	0.00952913	-0.970856
Dkk3	-0.387338	7.01828	-4.91793	0.000204798	0.00311421	0.683821
Slc19a2	-0.387163	5.40756	-4.16053	0.000897779	0.00776951	-0.671817
Fam212b	-0.387043	3.91696	-3.74035	0.00193737	0.0129799	-1.24073
P2rx2	-0.386965	3.70202	-2.92089	0.0107128	0.0412402	-2.79183
LOC100364500	-0.386776	1.71073	-2.89582	0.0109937	0.0419679	-2.62918
Pcdhgb5	-0.386595	3.07514	-4.45747	0.000449576	0.00502293	0.159148
Clic4	-0.386552	6.32545	-6.4756	9.94237e-06	0.000674187	3.68663
Kcng4	-0.38581	6.4737	-4.08064	0.00115463	0.00918543	-0.987961
Synm	-0.385748	6.01054	-4.97741	0.000169146	0.00274936	0.906006
Dok3	-0.385604	1.35386	-2.85359	0.0119794	0.0445712	-2.69167
Lactb	-0.385488	3.56124	-5.15965	0.000112577	0.00218336	1.43476
Anapc13	-0.385244	3.97847	-4.71208	0.000270405	0.00364093	0.611787
LOC108350688	-0.385181	2.25385	-3.16699	0.00631188	0.0287327	-2.17324
Elof1	-0.385047	4.73658	-4.82805	0.000215	0.0031612	0.770588
Mid1ip1	-0.384984	7.4885	-6.18096	1.67722e-05	0.000833627	3.14385
Cobll1	-0.384688	4.46261	-3.33996	0.00470061	0.0234492	-2.14288
Fgd2	-0.384298	2.66734	-3.09455	0.007324	0.031674	-2.32586
Hmgcs1	-0.38358	9.14062	-3.07146	0.00944318	0.0378744	-3.04305
Gfpt2	-0.383115	3.06695	-4.22865	0.000713676	0.00675062	-0.258012
Klhl25	-0.382806	3.75686	-4.76863	0.000241757	0.00339935	0.72676
Tmed1	-0.382605	3.66559	-4.55777	0.000367699	0.00441014	0.338775
Rgcc	-0.382407	4.23621	-3.63081	0.00246327	0.015155	-1.50832
Fuca1	-0.38214	6.13237	-4.13695	0.000995236	0.00830744	-0.827605
Pnp	-0.382067	6.13639	-4.83365	0.000228273	0.00326672	0.60458
Tmem119	-0.381884	4.18596	-3.53708	0.00299499	0.0171589	-1.68535
Mmgt2	-0.381626	4.12055	-5.0827	0.000130659	0.00239643	1.29272
Mpst	-0.381539	4.17769	-6.22443	1.55152e-05	0.000819235	3.30118
Atp5e	-0.381455	6.3758	-7.78852	1.116e-06	0.000309782	5.83892
Gng5	-0.381417	4.35889	-5.46277	6.30605e-05	0.00159063	1.9762
Dhrs4	-0.381403	3.21504	-4.03126	0.0010668	0.0086762	-0.626025
LOC684327	-0.381349	5.65929	-4.68696	0.000298528	0.0038582	0.372633
Sox6	-0.38069	4.99321	-5.38522	7.30564e-05	0.00171482	1.79818
LOC102549756	-0.38069	2.48034	-3.02037	0.00852596	0.0353028	-2.44605
Itgb2	-0.380432	3.63746	-3.13383	0.00677422	0.029966	-2.36738
Rassf2	-0.379429	7.17553	-5.50899	5.93401e-05	0.00154657	1.89308
Tapbp	-0.378804	4.19365	-4.09539	0.000935922	0.00797155	-0.585924
Kcnj10	-0.378697	8.34594	-6.45675	1.02769e-05	0.000677862	3.62848
Mt3	-0.378288	7.21113	-6.26976	1.43088e-05	0.000786429	3.30495
Rab13	-0.378233	3.81248	-3.6318	0.0024226	0.0149577	-1.43715
Pgls	-0.377543	3.89616	-4.63475	0.000315337	0.00399118	0.471558
Sema3b	-0.37733	3.93202	-2.8944	0.0114591	0.0431584	-2.88991
Ghr	-0.3769	3.95491	-4.12515	0.00088084	0.00768771	-0.501995
LOC103692336	-0.376791	2.24099	-3.41664	0.00377494	0.0201193	-1.72773
Tpcn1	-0.376495	7.14775	-7.0641	3.62546e-06	0.000447214	4.66899
Gfap	-0.376251	10.7018	-4.52018	0.000452464	0.00504412	-0.0877132
Acot3	-0.375164	3.6843	-4.09902	0.000929014	0.00794327	-0.526922
Zfp503	-0.374931	4.7912	-4.83097	0.000213766	0.00315295	0.770993
LOC100910558	-0.374509	4.01941	-5.56346	5.21561e-05	0.00142828	2.1603
Ttc30b	-0.374352	4.62124	-3.73297	0.00204288	0.0134227	-1.38036
Fdx1	-0.374261	3.13131	-4.30775	0.000608006	0.00611676	-0.113091
Rpn2	-0.373985	7.26061	-6.42702	1.08288e-05	0.000695625	3.58158
Hsd17b1	-0.373853	0.170465	-3.14866	0.00655415	0.0293914	-2.22536
Cmbl	-0.373624	4.42169	-5.78181	3.47144e-05	0.00115791	2.54363
Abhd4	-0.373612	6.98883	-8.03182	7.62786e-07	0.000272621	6.20749
Cldn10	-0.373523	4.83429	-4.81253	0.000221682	0.00322342	0.73161
Elovl5	-0.373395	7.91647	-7.05404	3.68707e-06	0.000447214	4.64781
Paqr4	-0.373169	6.27852	-4.68473	0.000309442	0.00395037	0.296643
Fam124a	-0.373031	3.9115	-3.8912	0.00142108	0.0105307	-0.948415
Zic3	-0.372359	4.25478	-3.8815	0.00144964	0.0106707	-1.01056
Serp1	-0.37219	6.32681	-5.27681	8.98594e-05	0.00190502	1.50328
Mmachc	-0.37213	3.35737	-5.84118	3.11116e-05	0.00110007	2.58312
Plxnb1	-0.371921	7.68399	-7.06942	3.59329e-06	0.000447214	4.67418
Tril	-0.371883	7.90351	-7.33617	2.31032e-06	0.000362729	5.11108
S1pr1	-0.371764	6.6242	-4.09735	0.00109192	0.00879373	-0.946806
Mthfs	-0.371389	3.68997	-4.66738	0.000295507	0.00384329	0.541494
Aamdc	-0.37108	2.71234	-3.6388	0.00238792	0.0148364	-1.33515
Cyth4	-0.370992	3.99604	-3.11704	0.00716953	0.0311868	-2.47181
Mob3b	-0.370359	2.79467	-3.28416	0.00495992	0.0243778	-1.98959
Drp2	-0.370035	6.17938	-6.73389	6.34859e-06	0.000546397	4.13437
Rcn1	-0.369703	5.32028	-3.88467	0.0015628	0.0112706	-1.20325
Irs4	-0.369572	3.46125	-3.12964	0.0068152	0.0300375	-2.34771
Nrros	-0.368452	2.04977	-3.14385	0.00661914	0.0295594	-2.20793
Ctf1	-0.36845	2.12622	-2.91026	0.0106751	0.0411656	-2.62047
Sipa1	-0.367636	4.64273	-3.28643	0.00525475	0.0253497	-2.27743
Mrpl34	-0.36749	4.11053	-5.1923	0.000105704	0.00208009	1.49374
Igsf1	-0.367279	6.91721	-5.27773	9.19226e-05	0.00192754	1.46231
Coa4	-0.367176	3.13022	-4.87044	0.000197791	0.00305542	0.900693
Mfge8	-0.366455	6.24385	-3.0584	0.00934352	0.0375756	-2.99163
Slc27a1	-0.365758	7.14884	-6.33201	1.28092e-05	0.00075103	3.41587
Me1	-0.36572	7.59	-6.09154	1.97036e-05	0.000879306	2.98249
Nlrp3	-0.365486	2.10394	-3.34124	0.00440972	0.0224484	-1.86022
Pla2g16	-0.365449	6.01192	-7.47287	1.84908e-06	0.000333135	5.34938
Scd2	-0.364938	12.5657	-5.64902	4.44322e-05	0.00130426	2.21583
Lgi4	-0.364629	6.40622	-5.75542	3.64527e-05	0.00117466	2.39547
Atox1	-0.364553	4.79744	-6.35228	1.2357e-05	0.000739634	3.52622
Tfap2a	-0.364417	2.84115	-3.14274	0.00663426	0.0295871	-2.25234
E2f5	-0.364184	3.33902	-3.39838	0.0039198	0.0206942	-1.82585
Abhd17c	-0.363782	3.89472	-4.69014	0.000282445	0.00373667	0.57526
Prrx1	-0.363738	3.81746	-3.14607	0.00661035	0.0295504	-2.37322
Sepn1	-0.363551	6.51053	-7.01122	3.96179e-06	0.000457525	4.59092
Pgm5	-0.362492	6.36534	-3.51498	0.0036517	0.0196886	-2.10299
Syne2	-0.362401	5.91581	-2.92698	0.0119959	0.0446114	-3.20276
Trpv3	-0.362283	2.63009	-4.31685	0.000596914	0.00603086	-0.110455
Cmtm6	-0.362192	4.295	-3.15091	0.00677706	0.029966	-2.46664
Sema4d	-0.362057	6.37296	-3.97033	0.00138426	0.0103697	-1.17035
Tnfaip8	-0.361881	3.48472	-3.89155	0.00142008	0.0105307	-0.905096
Dcdc2	-0.361479	2.79007	-2.77761	0.0139738	0.0497015	-2.90731
Scara3	-0.361202	4.6922	-3.16557	0.00677894	0.029966	-2.52453
Zic1	-0.360752	7.16937	-3.81906	0.00197255	0.0131035	-1.53828
Rilpl2	-0.360593	4.51268	-4.74839	0.000251637	0.00350057	0.639092
LOC103690543	-0.360197	1.26686	-3.37321	0.00412852	0.0214563	-1.81299
Hadh	-0.359639	4.39539	-6.1861	1.66184e-05	0.000832255	3.24345
F3	-0.35907	5.10715	-3.17666	0.00681208	0.0300347	-2.58466
Ppp1r18	-0.35906	4.02654	-3.61215	0.00252269	0.0154177	-1.50448
Bend3	-0.358425	2.93971	-3.51917	0.00305567	0.0174178	-1.56565
Hcls1	-0.358129	2.73613	-3.75899	0.00186451	0.0126431	-1.1158
Agpat1	-0.358106	7.21627	-6.86106	5.10754e-06	0.000501507	4.32857
Adgre5	-0.357904	3.36419	-3.1688	0.00628842	0.0286759	-2.26103
Uqcr11	-0.357733	6.67965	-6.56583	8.49148e-06	0.000621545	3.83269
Pdia6	-0.35768	7.21063	-5.94139	2.58864e-05	0.000996281	2.71458
Ak2	-0.357319	4.14923	-4.55221	0.00037181	0.00442892	0.297501
Tpk1	-0.356349	2.49173	-3.5303	0.00298634	0.0171474	-1.52739
Slc26a1	-0.356348	1.62865	-3.66525	0.00226128	0.0142998	-1.3003
Amigo2	-0.356236	5.1171	-3.6183	0.00266638	0.0159718	-1.69776
Fzd2	-0.355489	3.73499	-2.97438	0.00942116	0.0378198	-2.68617
Nmi	-0.355196	2.86867	-3.58795	0.0026517	0.0159509	-1.43453
Mgme1	-0.354994	2.21245	-3.37579	0.00410665	0.021404	-1.80023
Slc29a4	-0.354888	5.38016	-2.87958	0.0128237	0.0467795	-3.21095
Unc93b1	-0.354173	3.75084	-3.8792	0.00145652	0.0107162	-0.953725
Arsb	-0.353964	6.40691	-5.70276	4.01967e-05	0.0012419	2.29829
Chst3	-0.353903	4.03233	-4.36488	0.000541721	0.00567593	-0.0496936
Ccdc34	-0.3527	3.23001	-3.55085	0.00286244	0.0167116	-1.52786
Cnp	-0.352686	10.1063	-3.98477	0.00135111	0.0102137	-1.17177
Pi16	-0.352404	3.04441	-2.85243	0.0120076	0.0446443	-2.80364
Ccdc167	-0.352007	2.29809	-3.25347	0.00528347	0.0254647	-2.02053
Etfdh	-0.351961	5.5087	-5.02242	0.000146908	0.00254553	1.07339
Hsph1	-0.351297	8.09114	-4.47334	0.000488813	0.00532459	-0.193833
Psme1	-0.35127	5.74415	-4.13461	0.000918838	0.0078864	-0.736295
Etfa	-0.350895	6.12952	-4.02246	0.00120261	0.00943714	-1.02382
Wnt7a	-0.350665	4.95755	-4.81699	0.000219739	0.00320186	0.728307
Pllp	-0.350222	6.85599	-4.00017	0.00130261	0.00994839	-1.13518
Dynll1	-0.349977	7.21914	-6.92593	4.57499e-06	0.00049084	4.43775
Actb	-0.349598	9.88968	-7.8959	9.42612e-07	0.000292509	5.99936
Cnn3	-0.349586	7.31765	-6.39674	1.14227e-05	0.000707211	3.52784
Slc3a2	-0.349554	7.91803	-4.62486	0.000352322	0.00428416	0.125811
Paqr7	-0.349534	6.63354	-5.47187	6.19847e-05	0.00157618	1.85872
Mtss1l	-0.349447	8.82132	-5.89576	2.81421e-05	0.00104755	2.62595
Nr2f2	-0.349391	5.29873	-3.70493	0.00223027	0.0141897	-1.54884
Nectin2	-0.349225	5.14248	-6.34607	1.24937e-05	0.000741294	3.50762
Erap1	-0.349127	5.23274	-3.61341	0.00269501	0.0160626	-1.72307
Mmd2	-0.348996	7.56881	-6.01116	2.27943e-05	0.000936389	2.83742
Smim20	-0.348811	4.58863	-5.49407	5.94378e-05	0.00154657	2.0229
Ackr3	-0.34845	3.71229	-2.88661	0.0112682	0.0426433	-2.8467
Npm3	-0.348358	2.17197	-3.57171	0.00274196	0.0162444	-1.45112
Cd37	-0.348019	2.66497	-3.0242	0.00845939	0.0351275	-2.45283
Itpr3	-0.347985	3.41122	-2.91513	0.0105697	0.0408948	-2.74065
Tubd1	-0.347949	2.26942	-3.07813	0.00757477	0.0324716	-2.3317
Tgfb2	-0.347731	5.84556	-6.49074	9.68195e-06	0.000662262	3.7305
Ech1	-0.347725	6.5497	-4.77803	0.000247082	0.00344946	0.495958
Jam2	-0.346973	6.75913	-5.19495	0.000105165	0.00207766	1.32833
Stat1	-0.346643	6.32534	-4.45598	0.000479762	0.00525892	-0.143628
Gng10	-0.346553	5.60041	-6.2952	1.36748e-05	0.000773293	3.4016
Pnrc2	-0.346498	5.97964	-6.15455	1.75873e-05	0.000851231	3.1366
Mxra7	-0.346318	5.58595	-4.1201	0.000934775	0.00797077	-0.740286
Tom1l1	-0.346098	4.55115	-4.86036	0.000201751	0.00308385	0.848479
Col5a3	-0.345961	5.51488	-3.76884	0.00196959	0.0130894	-1.45213
Cmc2	-0.345758	3.69773	-4.51299	0.000402183	0.00467926	0.253757
Sash1	-0.345515	7.25946	-5.01941	0.000151355	0.00258462	0.958606
Vegfb	-0.344781	6.0041	-5.87849	2.90483e-05	0.00106311	2.63959
Tmem164	-0.344162	4.61886	-4.15569	0.000827742	0.00738369	-0.520664
Casp7	-0.343689	2.79354	-2.96209	0.00960441	0.0383295	-2.57659
Entpd2	-0.343052	4.87536	-4.36012	0.000546947	0.00570398	-0.150298
Golm1	-0.342709	5.32487	-4.95588	0.000167281	0.00273534	0.961341
Samd5	-0.342439	3.25509	-4.57749	0.00035349	0.00428897	0.38027
Fat1	-0.342305	7.48951	-5.30921	8.44541e-05	0.00185279	1.53217
Tnfrsf1a	-0.342266	4.50312	-4.33736	0.000572678	0.0058784	-0.151883
Me2	-0.342093	5.75706	-4.99767	0.000154169	0.00259952	1.00581
Il6r	-0.342028	3.32408	-4.15949	0.000821368	0.00735615	-0.391125
Bhlhe22	-0.341883	3.74821	-2.98317	0.00919978	0.0371375	-2.66853
Nme3	-0.341494	4.49275	-5.58364	5.02167e-05	0.00139963	2.18889
Svbp	-0.341479	2.90792	-4.0551	0.00101611	0.00839028	-0.575595
Lrp4	-0.341339	6.50799	-3.7719	0.00205289	0.0134602	-1.56712
Dynlt1	-0.340987	3.80604	-3.79042	0.00174781	0.0121463	-1.13075
Fndc3b	-0.340863	5.00559	-3.97821	0.00118905	0.00937357	-0.920153
Uqcrq	-0.340678	6.07508	-5.52172	5.64179e-05	0.0014987	1.97865
Sardh	-0.3398	4.56908	-4.09282	0.000940841	0.00799204	-0.637819
Fam189a2	-0.339547	3.38816	-3.71024	0.00206124	0.013498	-1.24079
Polr1e	-0.339213	3.15149	-4.27051	0.000655609	0.00641534	-0.181533
B4galt4	-0.33913	3.77048	-3.07245	0.00766351	0.0327355	-2.50364
Nuak2	-0.33879	2.66971	-3.00736	0.00875596	0.0359417	-2.4836
Sox9	-0.33857	5.35957	-2.98823	0.0100687	0.0396197	-2.98846
Smpdl3a	-0.338317	5.01992	-4.31676	0.000597019	0.00603086	-0.252052
Folh1	-0.338313	5.98566	-7.55394	1.62221e-06	0.000330003	5.4775
Hoga1	-0.33815	3.1881	-4.23217	0.000708599	0.00671903	-0.25257
Phyh	-0.337959	6.88217	-7.58334	1.54731e-06	0.000330003	5.51271
Adgrg1	-0.337694	7.80515	-5.78622	3.4432e-05	0.00115791	2.42446
Sox2	-0.337596	6.08413	-4.19533	0.000810994	0.00729242	-0.644104
Prrt1	-0.33722	7.00928	-4.06394	0.00111849	0.0089479	-0.996171
Gpx1	-0.336744	5.94651	-3.95905	0.00133432	0.0101263	-1.1166
C1qb	-0.336722	5.16763	-2.96589	0.0103844	0.0404829	-2.99555
Pdlim5	-0.336529	5.94884	-4.98994	0.000156512	0.00263025	0.976622
Oxct1	-0.336423	8.00108	-6.90782	4.71757e-06	0.00049264	4.40295
Efs	-0.33626	4.80906	-3.7117	0.00207259	0.0135327	-1.42907
Stard8	-0.336062	3.22228	-2.929	0.0102751	0.0401368	-2.68758
Shisa4	-0.335496	6.71891	-4.92653	0.000177175	0.00282039	0.81081
Myo1e	-0.335246	5.58486	-3.81849	0.00174915	0.012147	-1.34911
Pskh1	-0.335244	2.68321	-3.31093	0.00469385	0.0234304	-1.93357
Shisa5	-0.334826	5.75888	-4.84676	0.000207222	0.00311779	0.713747
Myh9	-0.334646	1.6378	-2.82711	0.0126408	0.0462954	-2.74397
Tmco1	-0.334423	4.84218	-5.92699	2.65771e-05	0.00100712	2.78737
RGD1563294	-0.334389	3.54828	-3.388	0.00400457	0.0210072	-1.87067
Acadvl	-0.334121	6.32623	-6.60064	7.99246e-06	0.000611998	3.90234
Tns3	-0.334082	7.54635	-5.5691	5.16064e-05	0.00142284	2.0228
Sumf1	-0.333982	5.42609	-4.86823	0.000198653	0.00306449	0.783628
Isyna1	-0.332612	5.41526	-3.72596	0.0020939	0.0136435	-1.50739
Itm2c	-0.332336	9.51592	-5.78213	3.46939e-05	0.00115791	2.42207
Tpp1	-0.331705	7.09979	-5.00842	0.00015097	0.00258462	0.959334
Nf2	-0.331491	6.45316	-6.67632	7.01059e-06	0.000571947	4.0282
Plcb3	-0.330872	4.60954	-4.68858	0.000283317	0.00374188	0.515379
Msmo1	-0.330853	7.39513	-3.64684	0.00269737	0.0160652	-1.85909
Prdx1l1	-0.330601	2.50318	-2.90394	0.0108135	0.041505	-2.65512
Dhx34	-0.33055	3.84394	-5.82443	3.20866e-05	0.00112188	2.60658
Ptbp1	-0.330386	5.79557	-3.76863	0.00196499	0.0130859	-1.48083
Zfp703	-0.330318	4.94993	-4.09869	0.00092963	0.00794421	-0.674394
Myl12a	-0.330289	4.97943	-3.6962	0.00216049	0.0139382	-1.49021
Tp53inp2	-0.330249	8.28158	-5.31441	8.36193e-05	0.00184549	1.53786
Sh3bp4	-0.330222	5.36344	-4.02935	0.00108566	0.00876431	-0.871193
Cd53	-0.32998	3.51074	-3.13581	0.00672937	0.0298271	-2.34343
Pxn	-0.329948	5.34703	-3.56954	0.00291426	0.0168882	-1.81663
Dera	-0.329854	4.40171	-3.51831	0.00306106	0.017425	-1.74428
Tomm7	-0.329445	5.33519	-5.25073	9.44676e-05	0.00195652	1.52101
Nit2	-0.329363	5.19252	-4.73793	0.000256903	0.00353304	0.553018
Lman2	-0.329083	5.77536	-6.70623	6.65803e-06	0.000560208	4.10062
Sil1	-0.328995	4.73198	-6.02897	2.20684e-05	0.000928911	2.97021
Zfp617	-0.328966	2.93944	-3.44391	0.00356861	0.019416	-1.70514
Snx18	-0.328814	5.50159	-4.71136	0.000270792	0.00364093	0.47238
Slc31a2	-0.328712	2.6408	-2.94879	0.00986879	0.0390661	-2.58642
Fam107a	-0.328314	7.81542	-3.27582	0.00591196	0.0274337	-2.6167
Mcm2	-0.327557	3.47057	-4.3418	0.000567563	0.0058412	-0.056498
Plpp3	-0.326563	8.19818	-6.21257	1.5848e-05	0.00082056	3.19695
Anxa5	-0.326535	6.66088	-4.99934	0.000153667	0.0025994	0.954495
Idi1	-0.326221	6.17106	-2.89299	0.0125714	0.0461166	-3.28038
LOC100910996	-0.325833	4.48835	-3.90797	0.00137304	0.0103167	-0.990638
Gamt	-0.325438	5.53244	-4.02302	0.00110902	0.0088812	-0.908515
Grn	-0.325232	5.95056	-3.68492	0.00235467	0.0147234	-1.66947
Isoc2b	-0.324976	3.18985	-3.71614	0.00203636	0.0134076	-1.21434
Fkbp4	-0.324748	7.81812	-5.31822	8.30129e-05	0.00184549	1.54647
Pml	-0.324626	4.60073	-3.27684	0.00513806	0.0249701	-2.2627
Csad	-0.324388	5.73534	-3.67446	0.00237506	0.0147807	-1.66013
Six5	-0.324103	2.22168	-2.89857	0.0109321	0.0417865	-2.64594
Mylip	-0.324099	4.22211	-3.2884	0.0049168	0.0242191	-2.16454
Ltbp3	-0.323745	6.50253	-5.39847	7.12393e-05	0.00169331	1.72538
Ung	-0.323551	1.8016	-2.99512	0.0089778	0.0365648	-2.46102
Mrpl54	-0.323229	4.81128	-4.87724	0.000195165	0.0030298	0.857159
Eno1	-0.323177	9.63456	-7.86403	9.90895e-07	0.000292509	5.94945
Hadha	-0.323126	7.72453	-7.76757	1.15359e-06	0.000309782	5.79774
Ptk7	-0.322343	4.57585	-2.96699	0.00986837	0.0390661	-2.8689
Ap5s1	-0.322334	3.17248	-2.78604	0.0137374	0.0490644	-2.94159
LOC498368	-0.322333	2.78693	-3.43081	0.00366627	0.0197241	-1.71989
Scamp2	-0.321897	4.61889	-4.8466	0.000207288	0.00311779	0.816239
Ctso	-0.321617	4.03467	-3.63759	0.00239386	0.0148505	-1.45647
Ctnna1	-0.321517	7.27101	-5.7688	3.55603e-05	0.00117198	2.39729
Kcng2	-0.321344	3.90989	-3.01805	0.00856645	0.0354136	-2.63068
Plcd1	-0.321055	4.45412	-4.38101	0.000524377	0.00556494	-0.0617836
Abhd3	-0.320934	7.84224	-6.20803	1.59774e-05	0.00082056	3.18978
Tmem173	-0.320901	2.00062	-2.94128	0.010021	0.039489	-2.56091
Mrps16	-0.320374	4.35828	-3.97062	0.00120766	0.00944821	-0.850348
Dusp18	-0.320343	5.47634	-5.07145	0.000133544	0.00242954	1.16967
Sntb1	-0.320101	4.24902	-2.89051	0.0113418	0.0428194	-2.94568
Cox20	-0.319518	4.33103	-5.37016	7.51819e-05	0.00175131	1.80941
Dstn	-0.319407	6.66669	-4.6296	0.000318586	0.00402122	0.229881
Yif1a	-0.319364	4.04099	-4.60325	0.000335772	0.00415445	0.402652
Tufm	-0.319338	6.23673	-5.38804	7.26669e-05	0.00171166	1.7186
LOC100361920	-0.319307	3.15222	-3.28389	0.00496266	0.0243837	-2.021
Vhl	-0.319293	5.99209	-6.85032	5.20176e-06	0.000501507	4.33611
LOC688064	-0.319121	1.92717	-3.19188	0.00599716	0.0277681	-2.12111
Tmed3	-0.319115	4.47761	-3.76521	0.00184079	0.0125421	-1.27017
Hmox1	-0.318949	3.28326	-3.50511	0.0031455	0.0177915	-1.61892
Fyco1	-0.318614	5.19912	-4.42715	0.000477838	0.00524884	-0.0546777
Nqo1	-0.3185	4.75081	-4.14937	0.000838446	0.0074603	-0.549775
Grin2c	-0.318493	5.81052	-3.50238	0.00340683	0.0187837	-2.01574
Gabbr1	-0.318178	9.92546	-5.43822	6.60615e-05	0.00163216	1.78453
C3ar1	-0.318123	1.93158	-3.25024	0.00531873	0.02554	-2.01883
Tcf7l2	-0.317754	3.66664	-3.24505	0.00537577	0.0257118	-2.15949
Fam110a	-0.316912	3.24476	-3.24944	0.00532743	0.0255509	-2.09543
Rasd1	-0.316535	3.9403	-3.38489	0.00403032	0.021114	-1.93261
Hdac9	-0.31638	4.73996	-4.59423	0.000341864	0.00420657	0.320315
Foxo1	-0.31615	4.49341	-3.19236	0.00606214	0.027942	-2.40434
Synpo	-0.315813	4.95564	-4.23073	0.000710677	0.00672631	-0.414288
Chtf8	-0.315786	5.482	-5.75234	3.66613e-05	0.00117466	2.4399
Pkig	-0.315736	5.14277	-4.98943	0.000156666	0.00263025	1.04136
Hspb11	-0.315358	3.16041	-2.84831	0.0121084	0.0449285	-2.82676
Rpe	-0.315177	5.04277	-4.54064	0.000380518	0.00449245	0.184211
Kti12	-0.314206	2.46294	-2.78703	0.0137098	0.0489962	-2.85828
P4ha1	-0.314152	5.84086	-3.21295	0.00626432	0.0286069	-2.60106
Dpy19l1	-0.314076	7.59395	-3.81866	0.00182719	0.0124907	-1.49194
Rarb	-0.314019	4.59218	-3.6693	0.00224253	0.0142272	-1.47598
Tmem107	-0.313957	2.73727	-2.94214	0.0100036	0.0394501	-2.60718
Lyn	-0.313698	3.98927	-4.28048	0.000642507	0.00633454	-0.207485
Mpzl1	-0.313048	5.40135	-4.44428	0.00046166	0.0051178	-0.0419481
Caskin2	-0.313034	5.84136	-4.52365	0.000393684	0.00460887	0.0736727
2002-09-01	-0.312418	7.80479	-5.93138	2.63643e-05	0.00100236	2.6907
Pex7	-0.312378	3.2934	-3.32063	0.00460104	0.0230799	-1.9674
Map3k5	-0.312003	3.55094	-4.51096	0.000403817	0.00468548	0.25558
Hadhb	-0.31183	7.38073	-5.6007	4.86356e-05	0.00137266	2.08368
Atp1a2	-0.311727	11.5443	-5.13395	0.000118308	0.00225448	1.22816
Lhfp	-0.311676	6.0961	-3.3988	0.00427706	0.0219659	-2.25898
Pdia4	-0.311416	5.94558	-4.11708	0.000912022	0.00785804	-0.758166
Bak1	-0.311267	4.07228	-3.88853	0.00142889	0.0105527	-0.973602
Sh2b2	-0.311035	3.17996	-2.81212	0.0130306	0.047281	-2.89538
Myh14	-0.310558	6.87302	-4.15995	0.000863367	0.00760495	-0.752944
Mgll	-0.309981	7.18805	-5.43428	6.6558e-05	0.00163411	1.77367
Agt	-0.309974	9.7577	-4.23658	0.000740053	0.00689956	-0.607012
Parp4	-0.309396	5.7743	-5.59217	4.94198e-05	0.00138482	2.12764
Cpq	-0.309367	4.484	-4.11707	0.000895466	0.00776663	-0.579785
Tspan6	-0.308986	5.45092	-5.13573	0.000117901	0.00225039	1.29414
Slc46a1	-0.30877	3.40554	-4.57339	0.000356393	0.00431084	0.373413
Ldah	-0.308739	5.18377	-4.92288	0.000178447	0.00283201	0.910317
Tmc5	-0.308575	1.97497	-3.05865	0.00788333	0.0333832	-2.35538
LOC102546764	-0.308567	3.00911	-2.93989	0.0100495	0.0395714	-2.64041
Jup	-0.30849	6.08008	-4.9293	0.000176216	0.00281948	0.849945
Synpo2	-0.308432	3.82833	-3.25942	0.00521908	0.0252261	-2.15674
Vcam1	-0.308281	5.0815	-4.48266	0.000427399	0.00485712	0.0667569
C1galt1c1	-0.307791	4.92028	-5.39886	7.11864e-05	0.00169331	1.82813
LOC102546809	-0.307415	2.96133	-3.0004	0.00888141	0.0362877	-2.52454
Pcca	-0.306667	5.04317	-4.30563	0.000610616	0.00613121	-0.276906
Pcbd2	-0.306408	3.26685	-3.94663	0.00126847	0.0097831	-0.786708
Npas3	-0.306389	4.53406	-4.79506	0.000229459	0.00327344	0.725742
Crip2	-0.306021	6.13395	-4.30016	0.000617408	0.0061687	-0.393835
Tln1	-0.305974	6.95608	-3.99976	0.00120817	0.00944821	-1.08438
Rbm43	-0.305626	2.67048	-3.24343	0.00539373	0.025782	-2.05586
Bmf	-0.305598	4.13931	-3.23341	0.0055061	0.0261404	-2.25741
Zfp579	-0.30558	3.77846	-3.36554	0.00419431	0.0216474	-1.94565
Fam58b	-0.305483	3.49141	-2.99839	0.00891793	0.0363872	-2.59846
Garem2	-0.305293	4.82373	-3.82488	0.00162833	0.0115788	-1.20094
Khsrp	-0.305258	6.17643	-5.8735	2.93159e-05	0.00106792	2.62176
Phgdh	-0.304986	7.11312	-3.70298	0.00228646	0.0144299	-1.70636
Tyw1	-0.304858	4.06155	-4.84775	0.00020682	0.00311779	0.860304
Wdr73	-0.3048	3.32834	-3.70035	0.00210363	0.0136912	-1.25449
Nhsl1	-0.304714	4.98681	-5.68127	4.18376e-05	0.00127891	2.34053
Gnai2	-0.304705	8.36655	-5.03308	0.000143888	0.00251828	0.996606
Ptgr2	-0.304699	6.48758	-5.04988	0.00013926	0.00249025	1.05979
Zfp277	-0.304656	3.82582	-4.97507	0.000161123	0.00267641	1.1043
Ehd1	-0.30458	6.07941	-6.62559	7.65374e-06	0.00060857	3.9532
Tmem109	-0.304486	4.84282	-3.90479	0.00138204	0.010358	-1.04507
Wfs1	-0.304034	4.61509	-5.3017	8.56769e-05	0.00186395	1.66913
Pola1	-0.303842	2.7639	-3.24739	0.00535001	0.0256434	-2.05489
Pdia3	-0.303765	8.2989	-5.20021	0.000104105	0.00207224	1.31925
Tead1	-0.303672	6.0158	-2.98286	0.0101246	0.0397373	-3.07368
Pigt	-0.303482	6.6211	-6.16582	1.72346e-05	0.000843635	3.13156
Fgd5	-0.303392	4.15615	-3.66972	0.00224058	0.0142264	-1.41126
Rom1	-0.303132	3.10188	-3.7111	0.00205757	0.0134852	-1.21826
Pea15	-0.303076	9.35602	-5.78841	3.42933e-05	0.00115791	2.43227
Snx5	-0.302505	6.97421	-6.15477	1.75804e-05	0.000851231	3.10351
Orai3	-0.30248	3.52022	-3.88616	0.00143586	0.0105891	-0.918463
Fam114a1	-0.302344	4.56788	-3.40756	0.00384633	0.0203612	-1.98815
Sox4	-0.302339	4.89263	-4.03078	0.00106785	0.00868023	-0.801974
Hexb	-0.302158	6.7971	-6.71172	6.59541e-06	0.000558435	4.08062
Mzt2b	-0.302054	4.69718	-3.5524	0.00285333	0.0166827	-1.7226
Nudt5	-0.302049	3.50479	-3.32984	0.00451453	0.0227894	-1.97575
Fbxo2	-0.301964	7.88114	-5.73675	3.77368e-05	0.00119561	2.33259
Tbc1d10a	-0.301697	3.88475	-5.16017	0.000112464	0.00218336	1.44
Crebbp	-0.301149	5.74797	-2.89602	0.0119339	0.0444359	-3.20495
Afap1l2	-0.301032	3.84007	-3.98501	0.00117263	0.00927677	-0.760093
Lasp1	-0.300911	7.14748	-6.19304	1.64127e-05	0.000832255	3.16914
Lgr6	-0.300562	4.29874	-4.03355	0.00106183	0.00865714	-0.719767
Idh2	-0.300415	6.71143	-3.71957	0.00217657	0.0140037	-1.64872
Pak4	-0.300224	3.92181	-3.3147	0.00465754	0.0233085	-2.06525
Tnc	-0.299368	2.72207	-3.00844	0.00873651	0.03589	-2.48621
Kirrel3	-0.299359	6.10176	-3.64528	0.00248421	0.0152479	-1.7433
Cst3	-0.299294	10.9774	-4.33431	0.00057621	0.00590983	-0.351893
Txnl4a	-0.299031	4.23071	-3.85081	0.00154389	0.0111806	-1.06792
Prex1	-0.29874	7.43352	-7.23518	2.72778e-06	0.000403094	4.94849
Ttc30a	-0.298403	1.99292	-2.88082	0.0113343	0.0428124	-2.66554
Tmsb10	-0.29839	7.43294	-4.37546	0.000538288	0.00565159	-0.306976
Pgpep1	-0.298201	4.29217	-3.99141	0.00115736	0.00919782	-0.801223
Epb41l2	-0.298087	7.18319	-5.0259	0.000145914	0.00253781	0.991572
Ppp1r14a	-0.298081	5.7063	-3.12206	0.00741299	0.0319178	-2.75331
Pigp	-0.29796	4.20965	-3.25719	0.00524319	0.0253088	-2.22328
Cacnb3	-0.297587	6.29919	-2.86287	0.0130115	0.0472442	-3.334
Prkcdbp	-0.29758	3.69198	-2.83816	0.0123605	0.0455456	-2.93034
Dnase2	-0.297422	3.93325	-3.13152	0.0067889	0.0299976	-2.4188
Lpcat3	-0.297257	4.94374	-4.07336	0.00097893	0.00822351	-0.724044
Crot	-0.296499	5.27244	-3.5736	0.00275683	0.0163139	-1.76722
Tmem51	-0.296228	3.02488	-3.35782	0.00426161	0.0219009	-1.87148
Pigq	-0.295999	6.81037	-5.65546	4.39005e-05	0.00129747	2.19623
Fam229b	-0.295978	2.2343	-2.80969	0.013095	0.0474205	-2.80191
Gpc4	-0.295768	3.8111	-3.81297	0.00166866	0.0117686	-1.08816
S100a13	-0.295675	5.20566	-4.04159	0.00104453	0.00855729	-0.818892
Cystm1	-0.29562	5.49149	-4.86342	0.000200539	0.00308268	0.768431
RGD1559896	-0.295614	7.5271	-5.8369	3.13576e-05	0.00110627	2.51976
Mllt1	-0.295479	5.571	-5.27288	9.05374e-05	0.00190893	1.54468
Sec61b	-0.295418	4.19643	-3.93172	0.0013078	0.00997344	-0.905464
Arhgef26	-0.295336	5.18546	-4.24002	0.00069741	0.00666112	-0.422672
Lman1	-0.295005	6.09843	-5.03009	0.000144728	0.00252843	1.04362
Tmem132a	-0.294995	7.07148	-4.69609	0.000279123	0.00370524	0.348369
Hk2	-0.294639	4.11475	-2.8176	0.0128868	0.0469101	-3.04661
LOC689574	-0.294317	4.73142	-4.8492	0.000206231	0.00311779	0.810812
Mccc2	-0.294052	5.53482	-3.01441	0.00917342	0.0370628	-2.93775
Pola2	-0.29405	2.44897	-3.10017	0.00724005	0.0314063	-2.30134
Hsd17b10	-0.29379	5.08598	-6.14865	1.7775e-05	0.000851231	3.16729
Cbx1	-0.293766	4.95602	-3.99279	0.00115411	0.00918543	-0.885319
Gpr146	-0.293742	5.38916	-3.55634	0.00287517	0.016736	-1.82071
Abat	-0.293638	9.10995	-6.28289	1.39779e-05	0.000777914	3.32486
Ogdh	-0.293584	7.08346	-6.59897	8.01578e-06	0.000611998	3.88258
Cacng4	-0.293238	4.32701	-4.15366	0.000831159	0.00740995	-0.489144
Mrps28	-0.293183	3.1669	-3.1438	0.00661992	0.0295594	-2.28357
Mettl2b	-0.293034	3.25407	-2.88024	0.0113477	0.0428313	-2.78175
Timp4	-0.292887	5.7398	-5.32261	8.23194e-05	0.00184207	1.6262
Nt5dc1	-0.292887	3.13535	-3.02978	0.00836336	0.0348321	-2.49086
LOC102553298	-0.292302	4.77991	-4.66429	0.000297328	0.00385155	0.451383
Sspn	-0.292085	4.90459	-2.88543	0.0116337	0.0436324	-3.08021
Spata13	-0.291654	5.18824	-3.93744	0.00129258	0.00991041	-1.02431
Hsp90b1	-0.291374	8.93712	-4.38903	0.000515972	0.00550933	-0.271297
Ckb	-0.291315	10.7734	-6.63127	7.57881e-06	0.000605686	3.94659
LOC691309	-0.291266	2.93826	-2.93143	0.0102243	0.0400185	-2.64762
Dag1	-0.291211	7.71162	-6.4502	1.0396e-05	0.000678511	3.61843
Dapk3	-0.290684	5.0738	-3.95798	0.00123932	0.00961662	-0.969316
Slc35f6	-0.290464	5.56481	-5.14551	0.000115694	0.00223002	1.30369
Eif4ebp2	-0.290279	5.36618	-4.79054	0.000231514	0.00329005	0.638506
Slc41a1	-0.289798	6.93483	-4.52435	0.000393133	0.00460587	0.0116583
LOC108348051	-0.289748	6.72429	-4.56839	0.000359977	0.00434087	0.106235
H2afv	-0.289566	4.38434	-4.51242	0.000402638	0.00467926	0.199105
Eci1	-0.289025	4.47702	-3.05146	0.00800028	0.033778	-2.66745
Yipf3	-0.288854	6.1673	-6.53696	8.93e-06	0.000635743	3.79795
Unc5b	-0.288298	6.85692	-3.58529	0.00285536	0.0166827	-1.9211
Rbm42	-0.288074	5.55141	-6.82304	5.44945e-06	0.000514218	4.30305
Ninj1	-0.287957	4.26052	-3.58674	0.00265832	0.0159669	-1.58893
Mrps6	-0.287825	4.96901	-3.4078	0.00384443	0.0203581	-2.04909
Nr2f1	-0.287747	5.61394	-3.95364	0.0012504	0.00967699	-1.04026
Sec61a1	-0.287664	5.84351	-4.71761	0.000267459	0.00364093	0.454799
Tmem185b	-0.287001	4.99553	-6.3807	1.1751e-05	0.000715668	3.57095
Acot11	-0.286894	5.15141	-3.65966	0.00228746	0.0144304	-1.5737
Krcc1	-0.286892	5.02394	-4.12508	0.000880965	0.00768771	-0.631561
Tspan31	-0.286655	5.33299	-4.54355	0.000378309	0.00447909	0.159961
Ift27	-0.28662	4.09655	-4.92354	0.000178215	0.0028312	0.999403
Id4	-0.286483	6.67091	-3.8309	0.00167643	0.0117968	-1.40025
Fam122a	-0.286464	3.89844	-3.38576	0.00402314	0.0210834	-1.92476
Emc10	-0.28646	6.5108	-5.88225	2.88484e-05	0.00106311	2.62338
Adgra3	-0.286346	4.96859	-5.12936	0.000119363	0.00226727	1.32148
Suox	-0.285902	4.67282	-3.9346	0.00130012	0.00993785	-0.963484
Tmem256	-0.28576	3.87629	-3.6244	0.00245981	0.0151428	-1.46048
Rap1b	-0.28568	6.61025	-5.05208	0.000138667	0.00248522	1.05851
Vps37b	-0.285353	3.958	-3.12839	0.00683276	0.0300895	-2.42907
Pfn1	-0.284458	6.72886	-6.41512	1.10581e-05	0.00070072	3.56933
Gli3	-0.284044	3.99027	-3.8185	0.00164981	0.0116724	-1.09934
Hps5	-0.283823	4.36856	-3.46038	0.00344943	0.0189652	-1.85315
Rest	-0.283813	4.35568	-3.15868	0.00642068	0.0290172	-2.43917
Anxa3	-0.28362	5.97656	-4.29437	0.000624688	0.00622067	-0.393045
Cers2	-0.283355	6.71192	-4.89678	0.000187819	0.002942	0.752837
Map2k6	-0.283154	5.22426	-4.0157	0.00110128	0.00884635	-0.872671
S1pr2	-0.283142	3.24507	-3.10974	0.00709927	0.0309671	-2.35636
Mospd3	-0.283078	4.1994	-4.03434	0.00106011	0.00865325	-0.706012
Sav1	-0.282917	4.54305	-5.11543	0.000122626	0.00229489	1.32849
Fam20c	-0.282885	6.15722	-5.12723	0.000119856	0.00227292	1.22671
Fstl1	-0.282805	6.41903	-3.62833	0.00254654	0.0154883	-1.79462
Pgm3	-0.282743	4.81951	-4.41175	0.000492885	0.00535034	-0.0433281
Fam185a	-0.282136	4.2529	-3.57825	0.00270525	0.0160877	-1.60444
Chadl	-0.281693	4.10443	-3.84118	0.00157472	0.0113305	-1.07001
Smpd3	-0.281377	5.28247	-3.91326	0.00135824	0.0102384	-1.08389
Rtn4rl1	-0.280709	4.63898	-3.45193	0.00351007	0.0191908	-1.91228
Ccdc43	-0.280556	4.06315	-3.22543	0.00559723	0.0263922	-2.26037
Snrpg	-0.280486	3.6181	-4.17972	0.000788251	0.00716096	-0.369053
Sox8	-0.280461	5.6202	-3.62056	0.0024881	0.0152658	-1.71118
Tsen15	-0.28033	4.10563	-4.45972	0.000447553	0.00500391	0.124599
Mrps23	-0.28006	4.67943	-5.96951	2.45907e-05	0.000960571	2.86755
Sdk1	-0.279978	4.6203	-3.92146	0.00133561	0.0101263	-0.982429
Echdc1	-0.279907	5.6433	-5.23337	9.76717e-05	0.0019895	1.46453
Mapkapk3	-0.279745	4.41332	-4.47048	0.000437979	0.00492145	0.115353
Tp53i11	-0.279593	6.15102	-3.23127	0.00586664	0.027301	-2.57775
Slc1a3	-0.278958	9.29619	-4.22168	0.000723846	0.00680768	-0.603617
LOC306766	-0.278946	7.46893	-6.61096	7.85055e-06	0.000611998	3.89937
Cetn2	-0.278941	5.75621	-4.39192	0.000512979	0.00549987	-0.179836
Acad10	-0.278864	3.91682	-2.93684	0.0101122	0.0397028	-2.78592
Rdh11	-0.278752	5.19001	-6.00931	2.2871e-05	0.000936389	2.91751
RGD1310352	-0.27809	6.78115	-4.24927	0.000684452	0.0065815	-0.532785
Pgm2	-0.278038	4.1193	-4.184	0.000781423	0.0071356	-0.406481
Scamp4	-0.277348	4.68455	-4.52695	0.000391089	0.00459221	0.195704
Tmem42	-0.277244	3.68725	-3.84431	0.00156465	0.0112787	-1.01435
Sox21	-0.277228	3.53917	-2.77669	0.0139995	0.0497705	-3.01721
Cyb5a	-0.277204	5.40279	-5.43829	6.60528e-05	0.00163216	1.86692
Zhx3	-0.277007	7.02533	-6.60584	7.92063e-06	0.000611998	3.89523
LOC100362197	-0.276856	2.27738	-2.90129	0.0108719	0.0416679	-2.64433
Mvd	-0.27664	5.03407	-2.96929	0.00967365	0.0385078	-2.93191
Rbm4b	-0.276486	4.5855	-3.87385	0.0014726	0.0108092	-1.07157
Anxa4	-0.276174	4.88978	-2.97402	0.00952196	0.038103	-2.89636
Irf9	-0.275562	4.39402	-3.01456	0.00862797	0.0355748	-2.72392
Ganab	-0.275493	7.72415	-5.75251	3.66493e-05	0.00117466	2.36267
Dad1	-0.274953	5.86163	-5.44252	6.55256e-05	0.00162661	1.84331
Rbck1	-0.274776	5.7131	-4.48775	0.000423059	0.00483355	0.0137198
Itga6	-0.274652	6.50727	-4.12529	0.000880588	0.00768771	-0.769022
Rps29	-0.274161	6.95153	-5.04329	0.000141059	0.00249384	1.03019
Pet100	-0.274086	5.04598	-4.74151	0.000255085	0.00351888	0.573833
Plin2	-0.274034	4.81636	-4.21166	0.000738724	0.00689767	-0.435476
Gyg1	-0.273989	5.4596	-4.20555	0.000747945	0.00693654	-0.52109
Ndufb10	-0.273928	6.45505	-6.28181	1.40048e-05	0.000777914	3.34262
2008-09-01	-0.273849	8.37752	-6.31952	1.30962e-05	0.000762597	3.38703
Pmp22	-0.273731	6.19533	-3.90204	0.00138984	0.010388	-1.1975
Mgat5b	-0.273637	6.02503	-4.58563	0.000347787	0.00425272	0.181095
Ak1	-0.273467	5.83355	-4.2465	0.000688307	0.00660235	-0.476189
Bysl	-0.273439	4.12735	-3.43141	0.00366178	0.0197175	-1.8717
Pxmp2	-0.273064	3.74939	-3.30204	0.00478065	0.0237426	-2.06327
Zbed5	-0.273057	4.92027	-3.96439	0.00122316	0.00952913	-0.937296
Prkcq	-0.27303	4.75252	-3.71569	0.00203824	0.0134091	-1.40784
Glb1	-0.272451	5.32712	-3.98363	0.00117595	0.00929834	-0.94873
Btg3	-0.27233	3.91354	-2.80596	0.0131945	0.0476501	-3.03084
Ints3	-0.272237	6.75642	-4.28196	0.000640578	0.00632662	-0.466265
Fam129b	-0.271989	5.61515	-3.74675	0.00191206	0.0128568	-1.45526
Tmie	-0.271935	4.52414	-3.00478	0.00880217	0.0360652	-2.76576
Top3b	-0.271892	5.10567	-2.81845	0.0132673	0.0478369	-3.23732
Hdac1	-0.271851	5.49803	-5.34941	7.82139e-05	0.0017964	1.69399
Thap7	-0.271758	4.10336	-3.15814	0.00642776	0.0290324	-2.39682
Gramd3	-0.27165	5.94109	-3.47942	0.00339556	0.0187405	-2.04109
Rnf5	-0.271418	5.93845	-5.20543	0.000103064	0.00206444	1.39036
Ncoa3	-0.270912	5.61869	-4.28146	0.000641229	0.00632906	-0.386238
Ppid	-0.270811	5.92941	-3.74652	0.00191294	0.0128568	-1.48775
Cd38	-0.270743	5.08274	-5.40104	7.08929e-05	0.00169021	1.82059
Jmjd8	-0.27072	5.60295	-3.40248	0.00393869	0.020773	-2.15172
Sppl2a	-0.270668	4.70573	-4.41974	0.000485025	0.0052948	-0.015006
Parva	-0.270547	5.86962	-3.36742	0.00430641	0.0220731	-2.26208
Atp5i	-0.270544	6.40425	-4.59628	0.00034047	0.00419271	0.176729
Tti1	-0.270538	5.25986	-4.19004	0.000771897	0.0070749	-0.530168
Tlcd1	-0.270458	4.33021	-3.08983	0.00739521	0.0318588	-2.56788
Degs1	-0.270448	7.13111	-6.25702	1.46376e-05	0.000796121	3.28324
Flrt1	-0.270073	5.55376	-4.96538	0.000164202	0.00270473	0.959725
Elp4	-0.269616	3.51194	-3.417	0.00377215	0.0201181	-1.81118
Smpd1	-0.269603	7.01397	-5.93737	2.60773e-05	0.000996281	2.71029
Mrpl38	-0.269435	5.22348	-4.3949	0.000509905	0.00548946	-0.121029
Nr2f6	-0.26933	4.84631	-3.77772	0.00179408	0.012331	-1.29791
Gabarap	-0.26883	7.10424	-6.91735	4.64192e-06	0.000491519	4.42441
Bet1	-0.268787	5.12923	-5.27671	8.98757e-05	0.00190502	1.58547
Mcee	-0.26872	4.27044	-4.57917	0.000352302	0.00428416	0.337839
Pde6d	-0.268505	5.29383	-5.60778	4.79947e-05	0.00136441	2.18744
Aco1	-0.268496	5.85296	-5.61212	4.76063e-05	0.00136326	2.15952
Gemin8	-0.268108	4.23988	-4.92105	0.000179088	0.00283643	0.98625
Id2	-0.267802	5.41928	-3.47011	0.00338095	0.0186871	-1.98608
Hspb6	-0.26712	5.29337	-4.57998	0.000351732	0.00428416	0.235171
Mydgf	-0.266694	5.17648	-4.88623	0.000191749	0.00298268	0.840397
Ctc1	-0.266527	5.79251	-4.46784	0.000440315	0.00494415	-0.0326616
Serpine2	-0.266151	8.50094	-5.67389	4.24167e-05	0.00128152	2.2154
Cx3cr1	-0.266076	4.61023	-2.82207	0.0128118	0.0467577	-3.1323
Olig1	-0.265819	7.38467	-4.88983	0.000190397	0.00297643	0.723269
Cd63	-0.265819	6.80632	-3.86481	0.00150634	0.0109644	-1.3112
Khdrbs3	-0.265067	6.11148	-5.48048	6.09844e-05	0.00156958	1.89912
Dhrs13	-0.265028	3.75214	-3.69804	0.00211366	0.0137295	-1.30266
Pigk	-0.264741	5.81005	-5.7617	3.6031e-05	0.00117296	2.43718
Orai1	-0.264491	3.42143	-2.96111	0.00962364	0.0383965	-2.65739
Entpd5	-0.264292	6.16841	-2.89907	0.0115861	0.0435216	-3.22939
Tmbim6	-0.263794	8.30792	-7.57391	1.57094e-06	0.000330003	5.49216
Enoph1	-0.263734	6.1771	-3.18872	0.00630939	0.0287297	-2.65492
Prdx1	-0.263724	7.26882	-6.22228	1.55751e-05	0.000819235	3.21968
Ccdc124	-0.263659	5.67903	-5.11568	0.000122568	0.00229489	1.23782
Gstk1	-0.263628	4.37132	-4.31759	0.000596016	0.00603086	-0.175896
Tvp23b	-0.263504	4.87024	-3.88621	0.00143572	0.0105891	-1.08593
Mettl16	-0.263341	5.57383	-4.39067	0.000514266	0.00550237	-0.165213
RGD735029	-0.262523	5.90662	-3.80759	0.00168722	0.0118461	-1.36287
Tle4	-0.262415	6.35944	-5.52835	5.57169e-05	0.00148996	1.97581
Hoxb4	-0.262365	5.06788	-4.32984	0.000581441	0.00594109	-0.232247
RGD1565033	-0.262318	3.7779	-2.91575	0.0105563	0.0408887	-2.80099
Rab5c	-0.262299	7.32443	-5.6738	4.24241e-05	0.00128152	2.22056
Hexim1	-0.262192	5.88041	-4.05217	0.0010222	0.00842723	-0.86922
Alg14	-0.262059	3.92506	-3.50159	0.00316842	0.0178761	-1.70507
Slc39a1	-0.261855	5.99408	-4.15698	0.000825571	0.00737692	-0.669228
Med21	-0.261628	3.53377	-2.85881	0.011853	0.044227	-2.86503
Ints4	-0.261127	5.93912	-4.88917	0.000190643	0.00297661	0.781863
Kdelr1	-0.260745	5.95112	-5.32791	8.14903e-05	0.00183664	1.62185
Calu	-0.260508	6.82826	-5.26199	9.24494e-05	0.00193342	1.45413
Ndufa11	-0.260432	6.35493	-5.36207	7.63486e-05	0.0017639	1.66317
Tspan18	-0.260368	4.27516	-2.81432	0.0129728	0.0471583	-3.0833
Skap2	-0.260348	5.55589	-4.47161	0.000436993	0.00491511	-0.00349885
Arhgap11a	-0.260089	2.91376	-2.79543	0.0134787	0.0483801	-2.89031
Hoxb2	-0.260072	5.01137	-4.02937	0.00107094	0.00868737	-0.819975
Syngr2	-0.259948	4.42128	-3.73801	0.00194673	0.0130161	-1.31602
Dnal4	-0.25971	4.46699	-4.25924	0.000670748	0.00651474	-0.300315
Cntfr	-0.259708	6.33589	-4.45013	0.000456258	0.00506867	-0.109015
Sorcs2	-0.25968	6.06067	-3.63844	0.00238969	0.0148364	-1.71719
Ndrg2	-0.25953	10.8705	-5.52141	5.64502e-05	0.0014987	1.9533
Mrpl52	-0.25941	4.84985	-3.15009	0.00653496	0.0293521	-2.53847
Pno1	-0.259386	4.35893	-5.11406	0.000122953	0.00229824	1.33797
Pogk	-0.259298	5.84304	-3.97626	0.00119381	0.00939692	-1.01807
Jun	-0.259188	6.12855	-5.01832	0.000148084	0.00255742	1.01877
Hepacam	-0.258864	7.47076	-4.80451	0.000225216	0.00325141	0.554905
Ergic3	-0.258509	6.63462	-5.61701	4.71719e-05	0.00135827	2.12999
Mbd3	-0.258403	6.36258	-5.25338	9.39883e-05	0.00194998	1.45633
Lap3	-0.257817	6.76318	-4.86534	0.000199784	0.00307408	0.689513
Ybx1	-0.25779	6.47627	-4.82028	0.000218321	0.00318467	0.6136
Llgl1	-0.257562	7.07051	-4.49615	0.000415992	0.00478539	-0.0480758
Gpr108	-0.257546	5.16321	-3.87086	0.00148164	0.0108501	-1.15421
Ncapg2	-0.25744	2.9129	-2.89572	0.0109958	0.0419679	-2.70953
Ppt2	-0.257386	4.49332	-2.99161	0.00904244	0.0367326	-2.78584
Manbal	-0.257259	5.45741	-4.38287	0.000522415	0.00555512	-0.169189
Txn2	-0.256809	6.06044	-4.92773	0.000176757	0.00281948	0.848035
Rangrf	-0.256748	3.56453	-3.22919	0.00555414	0.0262936	-2.17506
Mrpl27	-0.256676	4.99136	-4.83516	0.000212012	0.00315104	0.759438
Leprot	-0.256595	5.25787	-3.49264	0.00322746	0.0180876	-1.92065
Agtrap	-0.256513	4.55574	-3.86084	0.00151243	0.0110035	-1.09321
Lmo2	-0.256295	4.16924	-3.37657	0.00410008	0.0213865	-1.98514
Nrp1	-0.2562	5.5495	-3.07387	0.00780402	0.0331123	-2.79995
Ndufaf6	-0.256162	3.16815	-3.37373	0.00412415	0.0214549	-1.85484
Rftn1	-0.255763	4.08219	-3.1711	0.00625878	0.0285907	-2.36841
Ppib	-0.255761	6.3246	-6.12729	1.84723e-05	0.000861159	3.07285
Ctsl	-0.255367	7.06424	-5.86736	2.96486e-05	0.00107504	2.58151
Mob1a	-0.255315	5.15565	-5.0167	0.000148552	0.00255815	1.09193
Tuba1a	-0.255193	9.42745	-3.9366	0.00129479	0.00992251	-1.17685
Colgalt1	-0.255135	4.90873	-5.23369	9.76117e-05	0.0019895	1.52184
Tmem223	-0.254683	4.14587	-4.15749	0.00082472	0.00737636	-0.460816
Slc25a20	-0.254327	5.19728	-5.20301	0.000103546	0.00207145	1.44161
Ak4	-0.254313	6.15513	-4.57232	0.000357154	0.00431672	0.14522
RGD1310769	-0.254174	4.89145	-4.25568	0.000675616	0.0065407	-0.358035
Cyb561d2	-0.254149	3.79037	-4.16212	0.000816973	0.00733356	-0.4161
Eif2b1	-0.253947	4.40963	-5.30377	8.53383e-05	0.00186058	1.68464
Abhd6	-0.253919	5.71234	-4.20245	0.000752675	0.0069693	-0.552917
Megf10	-0.253549	6.27992	-3.39054	0.00406312	0.0212291	-2.24627
Tmem151b	-0.253496	6.28618	-3.49573	0.00323812	0.0181333	-2.02925
Kank1	-0.253389	6.41814	-4.32902	0.000582407	0.00594321	-0.355586
Nup133	-0.253229	4.13114	-3.78301	0.00177464	0.0122458	-1.18708
Rhbdd1	-0.253081	4.12338	-3.61073	0.00253011	0.0154449	-1.52197
Zfp710	-0.252957	4.72825	-4.54457	0.000377535	0.00447837	0.225004
Amz1	-0.25284	3.28311	-3.17353	0.00622761	0.0284962	-2.2422
Slc6a11	-0.252701	8.17088	-3.84948	0.00154811	0.0112006	-1.36122
Slc43a2	-0.252683	6.53065	-3.86839	0.00148919	0.0108762	-1.28806
Gm2a	-0.252579	6.57775	-4.73894	0.000256386	0.00352902	0.4491
Tmem229a	-0.252493	7.32701	-3.78341	0.00177319	0.0122458	-1.48682
LOC100910788	-0.252448	5.35197	-4.1459	0.000844392	0.00748108	-0.628208
Tulp3	-0.252366	4.82827	-3.147	0.00657649	0.0294663	-2.54111
Tubb4b	-0.252269	8.73841	-4.8937	0.000188955	0.00295684	0.726393
Mrpl40	-0.252126	4.11988	-3.93214	0.00130669	0.00996977	-0.895145
Fam120a	-0.251963	7.26394	-6.56623	8.48557e-06	0.000621545	3.82386
Rplp0	-0.251934	8.04423	-5.11876	0.000121839	0.00228954	1.1626
Uap1l1	-0.251932	4.47063	-3.90521	0.00138085	0.0103541	-0.994238
RGD1307752	-0.251384	5.24534	-4.39847	0.000506251	0.00545762	-0.116413
Tkt	-0.251267	8.15961	-6.87027	5.02814e-06	0.000501507	4.33933
Ssfa2	-0.25108	7.02006	-6.2975	1.3619e-05	0.000772926	3.35663
Glud1	-0.251037	9.57226	-5.19421	0.000105315	0.00207766	1.31577
Naga	-0.250975	5.63349	-4.25227	0.000680298	0.00656574	-0.445863
Nadk	-0.250956	5.90682	-4.2516	0.000681217	0.00656651	-0.472556
Med28	-0.250556	4.78336	-4.21241	0.000737596	0.00689767	-0.430191
Smim15	-0.25055	4.88492	-4.60149	0.00033695	0.00416245	0.318812
Eci2	-0.250157	5.49624	-5.19478	0.0001052	0.00207766	1.40246
Gmds	-0.249974	3.93643	-3.79366	0.00173622	0.0121067	-1.14092
Elavl1	-0.249672	4.68138	-3.68593	0.002167	0.0139572	-1.45663
Cops9	-0.249364	5.63028	-5.27287	9.05392e-05	0.00190893	1.54011
Coro2b	-0.24915	7.44995	-5.8894	2.84724e-05	0.00105187	2.61669
Fam81a	-0.249086	5.32462	-2.85616	0.0121544	0.0450406	-3.19146
Zhx2	-0.248848	5.1535	-4.81218	0.000221837	0.00322342	0.699856
Clpp	-0.248694	4.63207	-3.28492	0.00495215	0.0243473	-2.23971
Ift43	-0.248651	3.3495	-2.95985	0.00964836	0.0384266	-2.64905
Med16	-0.248554	5.65375	-5.31783	8.30752e-05	0.00184549	1.6232
Ctnnb1	-0.24849	8.31192	-5.93819	2.60382e-05	0.000996281	2.70185
Pir	-0.24845	4.10065	-3.93232	0.0013062	0.00996977	-0.892417
Lypla1	-0.248406	5.42547	-4.16347	0.000814741	0.00731772	-0.601328
Gdf11	-0.248228	6.76548	-5.07178	0.000133459	0.00242954	1.09065
Timm13	-0.247765	5.23349	-5.20016	0.000104115	0.00207224	1.43338
Bmpr1b	-0.24768	5.67068	-3.2031	0.00588734	0.0273622	-2.55012
Slc25a39	-0.247535	5.97211	-4.77343	0.000239474	0.00337375	0.553815
Naprt	-0.247297	3.80208	-3.37485	0.00411459	0.0214336	-1.93161
Tspan12	-0.247094	5.69731	-3.55975	0.00281043	0.0165197	-1.83942
Pla2g15	-0.246856	4.03601	-4.60475	0.000334765	0.00414526	0.405612
Tmem147	-0.246795	5.18865	-4.36092	0.000546073	0.00570337	-0.184427
Akr7a2	-0.246248	4.63621	-3.63578	0.00240284	0.0148826	-1.54926
Rexo2	-0.246239	5.45819	-4.32715	0.00058461	0.00595967	-0.279625
Nr1d1	-0.246042	6.11018	-3.23638	0.00556896	0.0263144	-2.53788
Wdr83os	-0.245952	5.01705	-3.36557	0.00419402	0.0216474	-2.14004
Sec61g	-0.245896	4.56477	-4.01228	0.001109	0.0088812	-0.796246
Ptms	-0.245546	8.52591	-4.3926	0.000512271	0.00549912	-0.266612
Aprt	-0.245305	4.78694	-5.0252	0.000146114	0.00253781	1.1398
Ss18	-0.244711	5.85406	-4.2008	0.000755204	0.00697846	-0.569421
Dars	-0.244698	6.03218	-5.14529	0.000115744	0.00223002	1.26913
Sh3kbp1	-0.24465	5.89159	-4.79861	0.000227856	0.00326672	0.609114
Lamtor4	-0.244302	5.02371	-4.97166	0.0001622	0.00268006	1.01758
Wwc1	-0.244177	6.11007	-3.22039	0.00575217	0.0269363	-2.56927
Tmod3	-0.244177	4.90177	-3.38819	0.00400298	0.0210059	-2.07842
Rab34	-0.244127	4.46734	-3.4483	0.00353645	0.0192678	-1.89276
Slc16a1	-0.244015	6.82733	-4.25651	0.00067448	0.0065375	-0.52009
Gpd2	-0.243633	5.90606	-3.86785	0.00149083	0.0108818	-1.24178
Btd	-0.243397	4.5625	-3.58542	0.00266555	0.0159718	-1.63761
Luzp2_1	-0.243147	7.79063	-4.12178	0.000886901	0.00772411	-0.809309
Cyfip1	-0.242451	6.50059	-4.1974	0.000760431	0.00699436	-0.623957
Mpv17l2	-0.240779	4.25349	-3.33801	0.0044392	0.0225258	-2.07394
Bcan	-0.240739	8.34661	-4.3729	0.000533025	0.00561487	-0.306537
Rap1a	-0.240277	6.40486	-4.23746	0.000701044	0.00667142	-0.538081
Cr1l	-0.240105	4.74327	-3.34527	0.00437325	0.0223063	-2.13895
Hm13	-0.239752	6.64342	-4.82782	0.000215099	0.0031612	0.620558
Agpat5	-0.239484	6.32733	-6.30644	1.34042e-05	0.000769095	3.39044
Lrrc8c	-0.238941	5.0843	-4.59096	0.000344105	0.00422242	0.277643
Hspe1	-0.238646	5.34804	-5.10546	0.000125017	0.00232023	1.24468
Clec11a	-0.238381	2.82022	-3.05038	0.00801802	0.0337891	-2.4192
Zmpste24	-0.238325	6.12872	-5.50466	5.82617e-05	0.00153185	1.94333
Tmbim4	-0.238214	4.8032	-3.60017	0.00258574	0.0156382	-1.64424
Cntn1	-0.238068	10.0431	-4.6742	0.000291527	0.00380858	0.308389
Nck2	-0.238054	4.51237	-3.60327	0.00256927	0.0155595	-1.59492
Tpt1	-0.237567	9.03257	-5.30337	8.54033e-05	0.00186058	1.51989
Sptssa	-0.237496	5.31678	-4.07589	0.000973901	0.00820512	-0.763779
Fbll1	-0.237346	4.94056	-3.28131	0.00498914	0.0244677	-2.29514
Cd82	-0.237065	6.2767	-4.60894	0.000331979	0.00412792	0.209354
Acsf2	-0.236672	7.04897	-3.93812	0.00129077	0.00990429	-1.16804
Snrpa	-0.23649	3.64767	-3.64552	0.00235506	0.0147234	-1.39122
Rab31	-0.236293	7.17376	-4.10532	0.000917162	0.00788287	-0.833693
Wdr34	-0.236282	3.85644	-3.13835	0.00669442	0.0297395	-2.39332
Bri3	-0.235935	4.77789	-3.17546	0.00620296	0.0284186	-2.47763
Uqcr10	-0.235922	6.09657	-4.48054	0.000429223	0.004872	-0.0323498
Usp1	-0.235297	4.40799	-3.19449	0.00596506	0.027644	-2.37898
Rpn1	-0.235154	7.77623	-5.08422	0.000130276	0.00239511	1.09725
Pecr	-0.235077	4.30284	-3.79178	0.00174295	0.0121286	-1.19379
Vcl	-0.234958	6.62923	-4.22753	0.000715307	0.00675089	-0.570125
Aldh9a1	-0.234934	5.33608	-4.22594	0.000717617	0.00676339	-0.467508
Tmed10	-0.234797	6.84157	-5.40594	7.02347e-05	0.00168678	1.72734
Cby1	-0.234431	4.99166	-3.90371	0.0013851	0.010371	-1.06724
Wdr6	-0.234377	8.38161	-3.68234	0.00218311	0.0140091	-1.69917
Prelid3b	-0.23411	5.3956	-5.04668	0.00014013	0.00249375	1.12866
Aacs	-0.234033	5.95781	-3.22742	0.0055744	0.0263163	-2.53018
Tango6	-0.233967	3.57231	-3.05343	0.00796806	0.0336783	-2.50828
Mapre1	-0.233817	6.17945	-4.74921	0.000251226	0.00349796	0.491736
Bcar1	-0.233659	6.40964	-4.94226	0.000171799	0.00278289	0.85481
Ngef	-0.233555	6.14239	-4.06707	0.000991574	0.00828374	-0.861695
Edf1	-0.233353	6.38592	-5.50286	5.84597e-05	0.00153386	1.92672
Pkd2	-0.23281	5.53046	-3.45521	0.0034864	0.0190948	-2.02944
Rbm14	-0.23281	4.80558	-3.20183	0.00587568	0.0273268	-2.43045
Slc6a9	-0.2326	8.36479	-3.54304	0.00290889	0.0168696	-1.98057
Dnal1	-0.232561	4.91565	-3.49542	0.00320899	0.0180487	-1.86825
Dync2li1	-0.232448	4.37407	-3.01165	0.00867939	0.0357146	-2.72633
Cdh4	-0.232405	4.87332	-3.9136	0.00135729	0.0102362	-1.0322
Tbrg1	-0.232399	4.32788	-4.24233	0.000694154	0.00664217	-0.317173
Ocel1	-0.232306	3.71515	-3.41857	0.00376002	0.0200933	-1.83526
Rpl39	-0.232095	4.57733	-4.20207	0.000753257	0.0069693	-0.425407
Ice2	-0.231861	3.70612	-2.81028	0.0130795	0.0473925	-2.98503
Frmd8	-0.231736	4.86812	-3.46787	0.00339659	0.0187405	-1.9159
Ddost	-0.231287	6.62231	-4.28268	0.000639646	0.0063214	-0.459246
Tomm6	-0.231116	5.87295	-5.28733	8.80664e-05	0.00189089	1.55015
Mb21d2	-0.231006	5.04748	-3.78138	0.00178059	0.0122727	-1.31792
Spg20	-0.230879	6.23259	-5.24806	9.49543e-05	0.00196222	1.45308
Fam96a	-0.230642	3.80153	-2.89501	0.0110118	0.0419989	-2.84426
Ddah1	-0.230563	6.72873	-2.92523	0.0107129	0.0412402	-3.20334
Ndufb2	-0.23048	5.74937	-3.81556	0.00165981	0.0117167	-1.33163
Cachd1	-0.230384	5.78688	-4.25747	0.000673169	0.00652911	-0.450231
Galnt10	-0.229774	3.8786	-3.19903	0.00590955	0.0274337	-2.28099
Rrp36	-0.229527	4.2934	-3.60564	0.00255676	0.0155145	-1.55728
Pex13	-0.229455	4.30847	-5.12114	0.000121278	0.00228329	1.35395
Brcc3	-0.229297	5.12215	-4.79571	0.000229165	0.00327224	0.670975
Gadd45gip1	-0.229291	5.03277	-4.62485	0.000321618	0.00404644	0.348793
Acot13	-0.22928	3.83961	-3.12494	0.00688129	0.0302183	-2.41616
Acadm	-0.229277	5.80278	-4.67645	0.000290227	0.00380109	0.377284
Adipor1	-0.229273	6.7188	-4.21124	0.000739351	0.00689767	-0.606801
Pou3f2	-0.22924	5.09558	-3.51859	0.00305928	0.017425	-1.84754
Rasa3	-0.228457	5.65623	-3.54321	0.00290788	0.0168696	-1.86803
Tmem50a	-0.228165	6.30344	-4.62245	0.000323155	0.00405601	0.234335
Bcap31	-0.228133	6.63019	-5.31556	8.34356e-05	0.00184549	1.5627
Prmt2	-0.227864	5.98606	-3.37245	0.00413498	0.0214613	-2.24406
Tmem208	-0.227651	4.27789	-4.28562	0.000635851	0.00629183	-0.227607
Tmem263	-0.226758	5.83401	-4.23156	0.000709479	0.00671903	-0.506237
Sox13	-0.226648	4.33664	-3.13646	0.00672047	0.0298094	-2.47931
Cox8a	-0.226239	7.4108	-5.66314	4.3276e-05	0.00129119	2.19966
Rsu1	-0.226195	4.86992	-4.03265	0.00106378	0.00866066	-0.795881
Snapc2	-0.226129	5.86646	-4.09514	0.000936392	0.00797155	-0.782002
Cdk2ap1	-0.226057	6.47972	-6.19032	1.6493e-05	0.000832255	3.17945
Tmem9b	-0.226017	6.63432	-6.2219	1.55856e-05	0.000819235	3.23083
B3gat2	-0.225985	3.92636	-3.27753	0.00502811	0.0246049	-2.13804
Ryk	-0.225922	5.21224	-3.05125	0.00800377	0.0337836	-2.78645
Ndufs8	-0.22535	6.07435	-5.2845	8.85445e-05	0.0018945	1.53172
Cuta	-0.225271	5.36958	-3.89742	0.00140307	0.0104456	-1.12604
Kcnn3	-0.225255	4.72772	-3.17329	0.00623077	0.0284962	-2.47384
Ccdc53	-0.225198	3.97004	-2.79598	0.0134639	0.04836	-3.06038
RGD1309534	-0.224798	4.71704	-4.08156	0.000962686	0.00812473	-0.679732
Arntl	-0.224672	4.61942	-2.9219	0.0104249	0.0405604	-2.94211
Tspan14	-0.224464	4.98423	-2.99988	0.00889087	0.0363052	-2.85239
Apoe	-0.22421	11.2984	-3.59525	0.00261213	0.0157674	-1.83302
Ctnnbl1	-0.224131	5.11563	-4.86024	0.000201797	0.00308385	0.795877
Abhd5	-0.224044	5.10506	-3.88537	0.00143818	0.0105962	-1.11818
Wasf2	-0.223925	5.57441	-3.6365	0.00239926	0.0148676	-1.67199
RGD1559909	-0.223588	5.03917	-4.25287	0.000679465	0.00656174	-0.380998
Hmg20b	-0.22341	4.54536	-2.81132	0.0130518	0.047325	-3.13945
RGD1560065	-0.22334	4.76886	-4.01672	0.00109898	0.00883701	-0.81441
Acox1	-0.223276	6.64885	-5.62096	4.68249e-05	0.00135576	2.13672
S100b	-0.22312	11.0925	-3.52816	0.00299954	0.0171589	-1.97245
Vgll4	-0.222584	4.8159	-4.37243	0.000533538	0.00561649	-0.120198
Fbxw4	-0.222468	4.22746	-2.82635	0.0126602	0.0463556	-3.05202
Ccdc12	-0.22208	4.50941	-3.05317	0.00797224	0.0336869	-2.67034
Atf6b	-0.222015	6.21342	-4.15285	0.000832535	0.00741687	-0.694885
Itm2b	-0.221845	9.49032	-4.45166	0.000454857	0.00506028	-0.140821
RGD1565002	-0.221804	5.19787	-4.37473	0.00053107	0.00561315	-0.15831
Tmem104	-0.221598	4.43552	-2.82584	0.0126734	0.046393	-3.09185
Atp5d	-0.221337	7.34981	-5.04573	0.000140388	0.00249375	1.0272
Diablo	-0.22132	4.70818	-2.93812	0.0100859	0.039665	-2.92639
Psap	-0.22115	11.2243	-4.63824	0.000313152	0.00397308	0.256584
Gnb2	-0.220668	7.58561	-4.91747	0.000180346	0.0028506	0.774799
Fasn	-0.220392	9.09447	-3.3404	0.00441735	0.0224613	-2.38349
Ccni	-0.219741	7.658	-4.43297	0.000472282	0.00521341	-0.183498
Rpl41	-0.219562	7.62716	-3.69743	0.00211632	0.0137318	-1.66513
Hsd17b12	-0.219538	7.08373	-6.46282	1.0168e-05	0.000675084	3.64618
Stt3a	-0.219448	6.07649	-3.43084	0.00366605	0.0197241	-2.13566
Emc3	-0.219323	6.71576	-5.28135	8.90796e-05	0.0018945	1.4945
Hsdl2	-0.219025	6.45422	-4.7816	0.000235638	0.00333126	0.538797
RGD1305350	-0.218904	4.96275	-4.69552	0.000279442	0.00370634	0.492892
Ubiad1	-0.218742	3.57483	-3.15556	0.00646189	0.029111	-2.31617
LOC691807	-0.218623	6.32979	-5.43515	6.64479e-05	0.00163411	1.8022
Spcs1	-0.217666	5.92433	-4.77337	0.000239505	0.00337375	0.55721
Ubl5	-0.217649	6.25518	-5.33454	8.04645e-05	0.00181875	1.61609
Tmem43	-0.217536	4.79516	-3.96848	0.00121296	0.00947208	-0.91326
Ppp1r14c	-0.217391	4.19137	-3.25705	0.00524465	0.0253088	-2.22109
Srgap1	-0.217225	5.63145	-3.7629	0.00184959	0.0125692	-1.42495
Mettl3	-0.216984	5.19971	-3.57726	0.00271079	0.0161146	-1.74472
Por	-0.216895	6.74012	-5.27029	9.0989e-05	0.00191309	1.47258
Crat	-0.216811	7.08844	-4.4766	0.000432636	0.00489098	-0.0874901
Ptges2	-0.216665	5.22881	-3.59414	0.00261807	0.0157972	-1.71482
Heatr5a	-0.216658	5.29096	-2.82865	0.0126013	0.0462154	-3.22848
Micall1	-0.216635	6.84493	-3.71595	0.00203717	0.0134076	-1.61053
Polr2k	-0.216625	4.74137	-3.0378	0.00822715	0.0344133	-2.73972
Srprb	-0.216559	5.30414	-4.37099	0.000535087	0.00562524	-0.177008
Dph3	-0.216517	5.09082	-4.53433	0.000385356	0.0045351	0.166311
Rcbtb2	-0.216158	4.96607	-3.36128	0.00423131	0.0218024	-2.14127
Ctsa	-0.216069	7.32809	-5.04839	0.000139664	0.00249169	1.03266
Arf6	-0.216043	5.45145	-4.74574	0.000252958	0.00351271	0.543341
Kctd1	-0.215821	5.08364	-3.96357	0.00122523	0.00953875	-0.959908
Odc1	-0.21573	6.42501	-4.78546	0.000233851	0.00331497	0.547886
Fabp5	-0.215619	6.12035	-3.82315	0.00163413	0.0115929	-1.35071
Rnf10	-0.215316	7.64034	-5.52791	5.57637e-05	0.00148996	1.94457
RGD1562618	-0.215118	6.14673	-3.89943	0.0013973	0.0104164	-1.19926
Sys1	-0.215075	4.69398	-3.20602	0.00582532	0.0271931	-2.40445
Larp7	-0.215047	4.93541	-3.48564	0.00327435	0.0182785	-1.89059
LOC100912557	-0.214868	5.19624	-3.50623	0.00313825	0.0177754	-1.88577
Hdac8	-0.214818	3.87117	-3.12582	0.00686878	0.030202	-2.4198
Arap1	-0.214619	5.83114	-3.36976	0.00415799	0.0215308	-2.23389
Fscn1	-0.214609	6.62247	-3.35421	0.00429343	0.0220211	-2.32882
Slc25a23	-0.214524	7.80626	-4.7781	0.000237274	0.00334834	0.499655
Chst2	-0.2145	7.03991	-3.63243	0.00241948	0.0149561	-1.78545
Ssr2	-0.214247	5.48525	-4.10569	0.000916473	0.00788287	-0.723014
Fam210b	-0.21423	5.45316	-4.42138	0.000483423	0.00528795	-0.0928318
Imp4	-0.214222	5.37339	-3.96157	0.00123024	0.00956369	-0.998346
Pde2a	-0.213904	5.90731	-2.97802	0.009297	0.0374365	-3.01645
Tmem101	-0.213844	4.03998	-3.15227	0.00650569	0.0292579	-2.39769
Sec11a	-0.213276	4.54765	-3.30498	0.00475177	0.0236517	-2.18692
Gfpt1	-0.213198	7.05639	-5.92329	2.67576e-05	0.00100995	2.68378
Pard3	-0.213065	5.30998	-4.2804	0.000642599	0.00633454	-0.356787
Hmbs	-0.212541	3.94694	-2.87552	0.0114571	0.0431584	-2.90727
LOC100363521	-0.212141	4.27381	-3.19933	0.00590602	0.0274272	-2.3469
Tmem56	-0.211817	6.62463	-3.54952	0.00287032	0.0167283	-1.93654
P4hb	-0.21177	7.51358	-4.63721	0.000313796	0.00397678	0.22433
Neo1	-0.211731	7.46398	-5.02665	0.0001457	0.00253781	0.988682
Fars2	-0.211689	4.04609	-3.81143	0.00167394	0.0117952	-1.12065
Thop1	-0.211669	4.9902	-3.87753	0.00146152	0.010748	-1.11925
Smad3	-0.211611	4.46319	-3.3127	0.00467675	0.0233748	-2.15798
Fndc5	-0.211433	7.19124	-3.39784	0.00392419	0.0207104	-2.26187
Efhd1	-0.211156	5.73391	-3.33318	0.0044836	0.0226845	-2.29638
Ndufaf3	-0.210914	4.80747	-3.42091	0.00374187	0.0200248	-1.99983
Dguok	-0.210281	4.10599	-2.86291	0.0117545	0.0439644	-2.96047
Pepd	-0.209983	5.68278	-4.33407	0.000576496	0.00590983	-0.288192
Myl6	-0.209773	7.9728	-4.94006	0.000172541	0.00279202	0.815996
Rbbp9	-0.209325	4.57195	-3.25398	0.00527786	0.0254533	-2.29072
Ubtf	-0.209319	6.73035	-3.52802	0.0030004	0.0171589	-1.98498
Coq9	-0.209215	5.73978	-4.21869	0.000728255	0.00683487	-0.523278
Cisd3	-0.209062	4.28962	-3.57589	0.00271845	0.0161417	-1.61513
Bckdhb	-0.209049	5.38097	-3.36299	0.00421645	0.0217401	-2.19482
Tnks1bp1	-0.208962	6.04441	-2.90907	0.010701	0.0412251	-3.16473
Il6st	-0.208914	7.89562	-3.03522	0.00835838	0.0348269	-3.00081
Car10	-0.208729	5.93009	-3.81075	0.0016763	0.0117968	-1.35902
Atf5	-0.208491	6.585	-3.44925	0.0035295	0.0192494	-2.13613
Arhgef28	-0.208299	5.44381	-3.37211	0.00413789	0.0214613	-2.18463
Ascc1	-0.208124	4.39884	-2.81594	0.0129303	0.0470365	-3.10387
Cxcl14	-0.207845	6.37999	-3.53225	0.00297433	0.0170879	-1.95637
Bmp1	-0.207838	5.43466	-3.43053	0.00366838	0.0197259	-2.06718
RGD1560248	-0.207761	7.01908	-3.75379	0.00188454	0.0127268	-1.53972
Scp2	-0.207707	7.74466	-4.38134	0.000524037	0.00556494	-0.287539
Cacybp	-0.207611	6.82704	-3.95752	0.0012405	0.00961662	-1.12203
Sertad2	-0.206943	4.77667	-3.52982	0.00298929	0.0171477	-1.7799
Gtpbp1	-0.206449	5.43935	-4.8523	0.000204976	0.00311421	0.751102
Psme2	-0.206332	4.99552	-3.39948	0.00391092	0.0206613	-2.07007
Mfsd1	-0.206297	5.76132	-4.21188	0.000738397	0.00689767	-0.538903
P2rx7	-0.205911	4.18966	-2.8741	0.0114902	0.0432545	-2.95497
Mtss1	-0.205847	6.56177	-3.57067	0.00274787	0.0162671	-1.89055
LOC100361558	-0.205724	6.81886	-3.14869	0.00655368	0.0293914	-2.74794
Arf4	-0.205606	6.72088	-3.86413	0.00150225	0.0109448	-1.3063
Immp1l	-0.205418	4.0098	-3.08108	0.00752914	0.0323202	-2.52893
Phka1	-0.205396	6.0517	-4.39273	0.000512136	0.00549912	-0.203464
Atp5g2	-0.205059	6.76171	-4.73926	0.000256225	0.00352902	0.442068
Tmbim1	-0.204797	5.75712	-2.99193	0.00903658	0.0367183	-2.97277
Siae	-0.204642	5.13288	-3.23342	0.00550604	0.0261404	-2.41789
Mocs2	-0.204429	5.75449	-4.13203	0.000868574	0.00763487	-0.697764
Gatc	-0.204243	4.94085	-3.02622	0.00842455	0.0350404	-2.79462
Mapkapk2	-0.204008	5.73581	-3.78434	0.00176983	0.0122395	-1.39306
Acadl	-0.203985	5.65862	-4.06385	0.000998123	0.00830744	-0.824704
Pkp4	-0.203851	9.00531	-2.92847	0.0103961	0.0404935	-3.20715
Mesdc2	-0.203659	6.55546	-4.84393	0.000208378	0.00312647	0.655812
Mrpl21	-0.203503	3.92539	-3.81686	0.00165538	0.0116959	-1.0948
Eif2ak2	-0.20346	5.40683	-2.8127	0.0130154	0.0472477	-3.27536
Imp3	-0.203395	4.28172	-3.21668	0.00569897	0.0267289	-2.31469
Sf3b5	-0.202679	5.1644	-4.0645	0.000996784	0.00830744	-0.768976
Tm7sf3	-0.202665	5.76309	-3.33074	0.00450616	0.0227619	-2.30447
Ecsit	-0.202307	5.24961	-4.11676	0.000896018	0.00776663	-0.674972
Pc	-0.202125	7.65617	-3.97561	0.00119539	0.00940465	-1.10304
Mthfd1	-0.202045	6.05069	-5.31427	8.36421e-05	0.00184549	1.58953
LOC361985	-0.202023	5.9448	-4.62313	0.000322717	0.00405375	0.260901
Ndst1	-0.201773	7.38765	-4.92406	0.000178035	0.0028312	0.790006
Chpf	-0.201522	6.87716	-4.0925	0.000941443	0.00799283	-0.85162
Fmn2	-0.201175	6.54626	-3.76712	0.0018336	0.0125148	-1.49346
Klhl13	-0.201148	6.63837	-4.28914	0.000631336	0.00626695	-0.447195
H2afx	-0.200608	4.75398	-3.07646	0.00760075	0.0325652	-2.66691
Ubxn8	-0.200572	4.28702	-3.18921	0.00603011	0.0278438	-2.36883
Extl1	-0.200098	6.34388	-3.15616	0.00645393	0.0290919	-2.70561
Ctnnd2	-0.200041	7.36095	-4.01786	0.00109644	0.00882104	-1.01373
Ppdpf	-0.200039	5.61035	-4.26671	0.000660676	0.00644787	-0.415087
Cant1	-0.199484	5.25663	-4.29003	0.000630199	0.0062651	-0.332043
Bbs9	-0.199481	4.37726	-2.94786	0.00988749	0.0391006	-2.84932
Chmp1b	-0.199398	5.34809	-3.39459	0.00395057	0.0208146	-2.12783
Ppp2r1b	-0.19926	4.54764	-3.56232	0.00279557	0.0164685	-1.68123
Epn2	-0.199145	7.05922	-4.38486	0.000520322	0.00554444	-0.269913
Enho	-0.198993	5.97052	-3.01586	0.00860496	0.0355173	-2.94906
Rhoa	-0.198959	8.19011	-5.14042	0.000116838	0.00224111	1.20408
Vamp3	-0.19862	5.86318	-4.42544	0.000479488	0.00525892	-0.123081
Sdhc	-0.19861	7.18679	-5.72369	3.86626e-05	0.00121122	2.31496
Stk16	-0.198568	5.55056	-4.2869	0.000634209	0.00628352	-0.369016
Jph4	-0.197875	7.03912	-3.50538	0.00314377	0.0177905	-2.04169
Eps8	-0.197743	5.9422	-4.47297	0.0004358	0.00490753	-0.0355026
Snta1	-0.197362	5.09672	-2.77992	0.0139086	0.0495033	-3.29276
Hsp90ab1	-0.197355	10.6218	-4.69615	0.000279093	0.00370524	0.360601
Actg1	-0.197057	8.78792	-3.53383	0.00296466	0.0170541	-1.9971
Isy1	-0.196979	4.12888	-3.04806	0.00805607	0.0339312	-2.61304
Cotl1	-0.196951	6.48682	-3.4445	0.00356422	0.0193989	-2.1399
F2r	-0.196758	5.8247	-3.03731	0.0082354	0.0344274	-2.89158
Fbl	-0.19669	4.38568	-2.98571	0.00915218	0.0370152	-2.77843
Pdzd11	-0.19667	4.5202	-3.36379	0.00420951	0.0217115	-2.06734
Rgs20	-0.196475	4.62202	-3.16946	0.00627993	0.0286455	-2.46406
Rpl18	-0.196474	6.74364	-4.17754	0.000791757	0.00717713	-0.675662
Tceb2	-0.196466	5.36724	-3.53951	0.00293015	0.0169365	-1.84147
Zfand3	-0.196262	6.35371	-5.49451	5.93891e-05	0.00154657	1.91248
Cacng8	-0.196143	4.70424	-2.89561	0.0109983	0.0419679	-3.00744
Ddrgk1	-0.196131	6.19866	-4.1994	0.000757351	0.00698242	-0.600604
Sec14l1	-0.19595	6.61371	-3.60743	0.00254734	0.0154883	-1.81935
Parvb	-0.195766	6.22729	-3.13092	0.00679725	0.0300129	-2.74629
LOC288913	-0.195471	5.09422	-3.68101	0.00218909	0.0140245	-1.52422
Tob1	-0.195444	5.24105	-2.93202	0.010212	0.0399802	-3.02244
Fer	-0.195438	5.48822	-3.91514	0.00135301	0.0102137	-1.10423
Snrpd2	-0.195435	5.10419	-3.68372	0.0021769	0.0140037	-1.52014
Mrpl4	-0.195424	5.53992	-3.44893	0.00353184	0.0192494	-2.0433
Tex264	-0.194813	5.8366	-4.27044	0.000655704	0.00641534	-0.42903
Ptgfrn	-0.19467	5.54801	-2.81583	0.0129332	0.0470365	-3.28821
Cuedc1	-0.194613	5.3695	-3.3272	0.0045391	0.0228766	-2.26448
Fam171a1	-0.19452	6.47478	-4.26961	0.000656801	0.00642205	-0.477957
Adra2a	-0.194239	4.74078	-2.92217	0.0104192	0.040558	-2.96277
Axin2	-0.194188	4.81491	-2.81859	0.0128611	0.0468646	-3.17342
Ak3	-0.194151	5.31153	-3.54473	0.00289878	0.0168297	-1.82404
Rbfa	-0.19401	4.71353	-3.21618	0.00570481	0.0267465	-2.38791
Pgap2	-0.194007	4.64505	-3.66775	0.00224966	0.0142494	-1.48767
Slc25a15	-0.193793	4.56193	-4.14741	0.000841799	0.00747448	-0.53081
Kcnd2	-0.193708	6.93673	-3.32532	0.00455678	0.0229288	-2.40022
Pknox2	-0.193422	4.97474	-3.30608	0.00474099	0.0236055	-2.25174
Jund	-0.193285	6.99148	-3.4143	0.00379321	0.0201618	-2.2235
Plekhf2	-0.192801	4.08506	-3.064	0.00779737	0.0331123	-2.57481
Pofut2	-0.192516	5.49535	-4.55226	0.000371768	0.00442892	0.160811
Rhbdd3	-0.19249	4.53867	-3.02506	0.00844462	0.0351052	-2.72992
Bend4_1	-0.192018	4.88804	-2.7956	0.013474	0.0483801	-3.2294
Slc48a1	-0.191724	7.38468	-3.72456	0.00200136	0.0132276	-1.60689
Hibadh	-0.191639	6.61369	-4.30059	0.000616868	0.0061687	-0.423154
Ccdc85b	-0.191597	5.81421	-3.44049	0.00359382	0.0195017	-2.0909
Gca	-0.191595	5.06971	-3.83984	0.00157908	0.0113484	-1.20459
Dock7	-0.191412	6.58028	-4.6109	0.000330687	0.00412411	0.196191
Nup98	-0.191247	6.03953	-3.78209	0.00177803	0.0122638	-1.42662
Znfx1	-0.190469	5.7854	-3.00504	0.00879746	0.0360553	-2.95043
Slc35b2	-0.190036	4.87059	-3.72837	0.00198575	0.013153	-1.39976
Lpcat1	-0.189309	5.30608	-3.44971	0.00352618	0.0192386	-2.01276
Sharpin	-0.189247	5.43172	-4.60716	0.000333161	0.00413521	0.274591
Akap13	-0.189132	5.90814	-2.81198	0.0130343	0.0472834	-3.33847
Unc119b	-0.189116	5.63318	-2.78203	0.0138492	0.0493703	-3.36382
Ddah2	-0.188981	5.55201	-3.55096	0.00286179	0.0167116	-1.84084
Tspan9	-0.188835	5.83431	-3.56551	0.00277725	0.0163914	-1.84252
Erh	-0.188799	5.68	-4.21766	0.000729782	0.0068451	-0.519682
Ptov1	-0.188709	7.09246	-3.35822	0.00425811	0.0218901	-2.33896
Pcdh10	-0.188708	6.80526	-3.1369	0.00671428	0.0297939	-2.7708
G3bp1	-0.188592	6.61756	-3.72356	0.00200551	0.0132494	-1.58531
Dnajb11	-0.188455	5.63758	-3.57834	0.00270478	0.0160877	-1.79582
Arhgdia	-0.18838	8.38185	-4.25824	0.000672106	0.00652285	-0.536475
Clptm1	-0.18827	7.94576	-5.39385	7.18684e-05	0.00170568	1.68947
Slc39a7	-0.188099	6.3703	-5.05979	0.000136603	0.00246333	1.08438
Mgat2	-0.187737	4.65419	-2.90065	0.0108859	0.0416912	-2.98911
Slc14a1	-0.187736	6.58205	-3.02181	0.00850082	0.035236	-2.98689
Zfyve16	-0.187476	5.14091	-3.0062	0.00877676	0.0360082	-2.86409
Ggh	-0.187406	4.46592	-3.47078	0.00337624	0.0186676	-1.84872
Ube2a	-0.187355	5.47944	-3.57084	0.00274687	0.0162671	-1.79258
Map4	-0.187345	9.56293	-3.60515	0.00255933	0.0155145	-1.84492
Cers4	-0.187315	6.67145	-3.72072	0.00201726	0.0133046	-1.59366
Sf3b2	-0.186986	7.59705	-5.95775	2.51239e-05	0.000978959	2.74006
Ccdc90b	-0.186677	4.52553	-3.99294	0.00115375	0.00918543	-0.82947
Copz1	-0.186667	6.56236	-3.9852	0.00117216	0.00927677	-1.05442
Nop16	-0.186648	4.73398	-2.80589	0.0131963	0.0476501	-3.18366
Rpl22	-0.186444	5.3288	-3.31538	0.00465108	0.0232836	-2.28266
Ndc1	-0.186418	4.28186	-2.90425	0.0108064	0.0414984	-2.91506
Tmsb4x	-0.18622	9.37788	-3.66909	0.00224348	0.0142275	-1.71822
Ftl1	-0.185912	7.27994	-3.14626	0.00658655	0.0294959	-2.76648
Igsf8	-0.185695	6.76794	-3.49482	0.00321298	0.0180589	-2.05357
Smdt1	-0.185567	5.99997	-3.37091	0.00414815	0.021487	-2.24862
Agl	-0.185534	7.09854	-3.77271	0.00181263	0.0124259	-1.50362
Atp6v0a2	-0.185487	5.00605	-3.2182	0.00568113	0.0266674	-2.42949
Fahd2a	-0.185353	5.15172	-2.83481	0.0124447	0.0457805	-3.19642
Dcaf7	-0.185197	7.24056	-3.54709	0.00288471	0.0167728	-1.96255
LOC688869	-0.185154	7.19641	-4.02958	0.00107047	0.00868737	-0.986968
Gprc5b	-0.185147	9.0431	-3.75604	0.00187585	0.0126893	-1.54605
Mpp1	-0.184848	5.738	-3.2389	0.00544424	0.0259284	-2.48431
Sod1	-0.184778	7.85102	-4.31857	0.000594839	0.00602688	-0.414141
Slc6a1	-0.184524	9.58852	-3.30096	0.00479123	0.02378	-2.45635
Zcchc3	-0.1845	3.93199	-3.13852	0.00669206	0.0297395	-2.40589
Nme2	-0.184215	6.83508	-4.47298	0.000435787	0.00490753	-0.0877352
Prkx	-0.184097	4.14834	-2.93449	0.0101608	0.0398496	-2.83312
Srebf2	-0.184001	7.76814	-4.62784	0.000319703	0.00402883	0.203222
Derl2	-0.183919	4.80366	-2.95713	0.00970208	0.0385719	-2.90619
Gabrg1	-0.183864	7.09061	-3.03777	0.00822763	0.0344133	-2.97644
Gtf2e1	-0.183666	4.68339	-3.2692	0.00511509	0.0248983	-2.27926
Cyp2d4	-0.18361	4.95354	-2.88196	0.0113079	0.0427431	-3.07529
S100a10	-0.183499	5.28971	-2.95677	0.00970935	0.038591	-2.98144
Zc3h18	-0.183238	5.6252	-3.75451	0.00188177	0.0127162	-1.44125
Mrps36	-0.183166	5.15183	-3.20532	0.0058337	0.0272123	-2.47602
Laptm4b	-0.183005	7.4354	-4.28646	0.00063477	0.00628511	-0.474174
RGD1565616	-0.182694	8.0676	-3.14267	0.00663524	0.0295871	-2.78289
Map1lc3a	-0.182642	7.05315	-3.06863	0.00772366	0.0328938	-2.91455
Sgce	-0.1826	4.88022	-3.09015	0.0073904	0.0318556	-2.66081
G6pc3	-0.18229	5.77579	-3.24664	0.00535822	0.0256697	-2.47319
Ahdc1	-0.182211	6.15353	-3.78648	0.00176205	0.0122073	-1.42738
Lrrc42	-0.182079	4.67098	-2.8655	0.0116928	0.0437858	-3.05926
Gde1	-0.181847	6.78876	-3.09911	0.00725575	0.0314396	-2.84496
Ide	-0.181711	6.13644	-4.10282	0.000921847	0.00790356	-0.789607
Wdr35	-0.181619	6.13612	-3.41671	0.00377446	0.0201193	-2.16935
Lix1l	-0.181571	5.91967	-3.81075	0.0016763	0.0117968	-1.35819
Tor1aip1	-0.181343	5.2617	-3.58566	0.00266425	0.0159718	-1.73616
Thada	-0.181307	5.00054	-3.43642	0.00362414	0.0196024	-1.99774
Txndc5	-0.181218	6.39238	-2.94578	0.00992953	0.0392471	-3.12324
Timm21	-0.18111	4.46405	-3.49414	0.00321752	0.0180589	-1.80258
Yipf5	-0.180701	5.61194	-3.25316	0.00528683	0.0254684	-2.44148
Tmem69	-0.180377	4.35787	-2.87176	0.0115451	0.0433985	-2.99076
Zfp46	-0.180269	5.09442	-3.21254	0.00574767	0.0269233	-2.45365
Tab1	-0.179808	5.27763	-3.24659	0.00535878	0.0256697	-2.41205
Ilk	-0.179801	6.65752	-4.71349	0.000269652	0.00364093	0.395287
Tor1aip2	-0.179492	6.28719	-2.95801	0.00968477	0.0385422	-3.09122
Tmem205	-0.179107	4.10534	-3.0219	0.00849933	0.035236	-2.65894
Bpgm	-0.179047	6.62791	-4.91969	0.000179564	0.00284111	0.800413
U2af2	-0.178349	6.9754	-4.42816	0.000476872	0.00524884	-0.181311
Slc35a4	-0.17817	5.63085	-3.89787	0.00140179	0.0104411	-1.15438
Sall2	-0.17786	6.68315	-4.4356	0.000469788	0.00518954	-0.156526
Dcakd	-0.177694	5.00974	-3.38735	0.00400998	0.0210215	-2.09628
Fig4	-0.177527	6.03359	-4.30526	0.000611075	0.00613189	-0.376392
Qsox1	-0.1775	5.38189	-3.13624	0.00672349	0.0298094	-2.64353
2011-09-01	-0.177482	5.94082	-3.19626	0.00594332	0.0275595	-2.59058
Vps4b	-0.17744	6.27014	-3.68027	0.00219241	0.0140401	-1.65045
Mesdc1	-0.17718	4.57458	-3.08209	0.00751357	0.0322888	-2.62601
Nsmce1	-0.177007	4.23695	-3.04474	0.00811118	0.0340932	-2.63872
Ctdsp1	-0.176937	6.0834	-3.14093	0.006659	0.0296368	-2.71391
Lamtor1	-0.176887	5.20212	-3.35231	0.00431022	0.0220855	-2.1926
Gtf2h5	-0.176565	5.26353	-3.80804	0.00168567	0.0118405	-1.29231
Rnf130	-0.176548	6.33469	-3.80948	0.00168066	0.0118157	-1.39476
Snap29	-0.176506	5.49229	-3.92209	0.00133388	0.0101263	-1.09087
Rps27	-0.176238	6.34097	-3.00005	0.00888775	0.0363019	-3.01328
Acsl6	-0.176084	8.5886	-3.54925	0.0028719	0.0167294	-1.96725
mrpl24	-0.176062	4.70125	-3.29146	0.00488593	0.0241355	-2.23851
Eef1d	-0.176015	5.92088	-4.24779	0.000686498	0.00658904	-0.481758
Arfip1	-0.175995	5.22945	-4.02547	0.00107951	0.00873419	-0.854451
Slc15a4	-0.175932	4.71631	-2.97386	0.00937641	0.0376692	-2.85934
Hcfc1r1	-0.175915	6.28305	-3.9311	0.00130946	0.00998121	-1.14592
Chmp5	-0.175697	6.77437	-4.1979	0.000759657	0.00699134	-0.636001
Lage3	-0.175458	5.30013	-3.39266	0.00396626	0.0208622	-2.12552
Tceal8	-0.175145	5.89617	-3.75234	0.00189021	0.0127566	-1.47343
Fam149b1	-0.175059	5.35062	-3.49408	0.00321791	0.0180589	-1.93013
Ino80e	-0.174962	5.23164	-3.14738	0.00657145	0.0294521	-2.60127
Txndc15	-0.174917	5.77825	-4.0283	0.00107329	0.00869734	-0.907854
Astn1	-0.174622	7.92801	-3.10145	0.00722107	0.0313326	-2.86391
Mettl9	-0.174552	5.84694	-3.24983	0.00532317	0.025546	-2.47451
Dnajb12	-0.174532	5.78781	-4.44754	0.000458645	0.00508798	-0.0728515
Raver1	-0.174525	5.55918	-3.39544	0.00394361	0.0207919	-2.15234
Nr1h2	-0.174429	5.80124	-3.69472	0.00212816	0.0137864	-1.57986
Thumpd3	-0.173426	5.26608	-3.18912	0.00603128	0.0278438	-2.5239
Ccnd3	-0.173222	5.19378	-2.87677	0.0114279	0.0430822	-3.12221
Ankrd40	-0.172848	7.67498	-3.37388	0.00412287	0.0214549	-2.31804
Sdf2	-0.172628	5.75421	-2.99638	0.00895468	0.0364896	-2.96387
Uba1	-0.172473	8.22892	-5.52592	5.59732e-05	0.0014911	1.93823
Tram1	-0.172358	6.26451	-3.35485	0.00428776	0.0220064	-2.3038
Apoo	-0.172342	4.92394	-2.79656	0.0134479	0.0483138	-3.23365
Cnpy3	-0.172323	5.93768	-3.89036	0.00142353	0.0105379	-1.19981
Cxxc5	-0.172194	6.67278	-4.07416	0.000977344	0.00821745	-0.880651
Nutf2	-0.172079	5.83762	-4.07063	0.000984396	0.00825216	-0.828615
Cabin1	-0.171675	6.10399	-3.60761	0.00254642	0.0154883	-1.78337
Jagn1	-0.171564	5.03222	-3.89093	0.00142189	0.0105307	-1.09815
Xab2	-0.171549	5.29634	-3.4601	0.00345144	0.0189696	-1.99089
RGD735065	-0.170999	6.03914	-4.31801	0.00059552	0.00602988	-0.351435
Ctnnd1	-0.170973	7.12947	-3.34986	0.0043321	0.0221541	-2.35672
Afap1	-0.17082	5.17417	-2.88752	0.0111809	0.0424577	-3.09864
Anapc1	-0.170726	6.56045	-3.26584	0.00515061	0.0250013	-2.50214
Cnpy2	-0.170501	5.73349	-3.777	0.00179672	0.0123335	-1.40764
Ddb1	-0.170415	8.12037	-4.22154	0.000724055	0.00680768	-0.610305
Ntmt1	-0.170413	4.25825	-2.98308	0.0092014	0.0371375	-2.76065
Ormdl3	-0.169675	6.43437	-3.63472	0.00240807	0.0149032	-1.75386
Lamp1	-0.1695	9.15313	-3.17735	0.0061789	0.0283332	-2.70857
Srpra	-0.169441	6.98432	-3.73315	0.00196631	0.0130859	-1.5805
Fn3krp	-0.16944	5.41003	-3.09194	0.00736335	0.0317846	-2.73425
Tbc1d20	-0.169401	5.43437	-3.64543	0.00235551	0.0147234	-1.63804
Mipep	-0.169214	5.74998	-2.91041	0.0106719	0.0411632	-3.13072
Mrpl16	-0.169059	4.22505	-2.96968	0.00945675	0.0379044	-2.78017
Alg3	-0.168912	4.64769	-3.41496	0.00378807	0.0201479	-1.98718
Rbbp4	-0.168757	6.07662	-3.87101	0.00148121	0.0108501	-1.25093
Creg1	-0.168456	4.67297	-2.91447	0.0105839	0.0409247	-2.96607
Snf8	-0.168442	5.62707	-4.55401	0.000370474	0.0044231	0.151842
Ctdnep1	-0.168346	5.81358	-4.0498	0.00102716	0.0084637	-0.868145
Vwa8_1	-0.168246	6.27085	-3.83783	0.00158559	0.0113646	-1.33298
Ywhae	-0.167814	9.78719	-4.39232	0.000512559	0.00549912	-0.255474
Ppp2r5a	-0.167794	5.56174	-3.713	0.00204956	0.0134515	-1.51749
Shfm1	-0.167598	5.25565	-3.29286	0.00487188	0.0240963	-2.3177
Zc3h7b	-0.167571	8.60925	-4.32583	0.000586172	0.0059689	-0.400007
Ammecr1l	-0.167528	5.92396	-3.4909	0.00323909	0.0181333	-2.00128
Ppp1r9b	-0.167122	8.32179	-4.23641	0.000702526	0.00667741	-0.58045
Slc35a1	-0.166834	4.52806	-2.91759	0.0105169	0.0407766	-2.93457
Pcdhga10	-0.166724	3.76324	-2.88072	0.0113367	0.0428124	-2.86452
Mboat2	-0.166715	6.74222	-2.85783	0.0118765	0.0442937	-3.31564
Gdpd5	-0.166665	5.0903	-2.84156	0.0122756	0.0453501	-3.17433
Dis3l2	-0.16649	5.00133	-3.16828	0.00629517	0.0286925	-2.52691
Chchd3	-0.166209	6.0809	-4.61872	0.000325571	0.00407653	0.241782
Ptdss2	-0.166097	6.60925	-4.25529	0.000676141	0.00654156	-0.513794
Arhgef10l	-0.166004	6.16975	-3.74832	0.0019059	0.0128375	-1.50562
Cfap20	-0.165623	4.8819	-3.28669	0.00493412	0.0242815	-2.27608
Tmem108	-0.165516	4.95115	-3.47727	0.00333141	0.0185375	-1.90979
Scamp3	-0.165505	5.87497	-3.95009	0.00125951	0.00973787	-1.07396
Smad5	-0.164991	6.30457	-3.28193	0.00498278	0.0244518	-2.45266
Uba52	-0.164915	7.34807	-3.73685	0.00195137	0.0130402	-1.58142
Fez1	-0.164847	8.64903	-2.89521	0.0110073	0.0419917	-3.26879
Amfr	-0.164826	8.26412	-5.45443	6.40645e-05	0.00160818	1.8035
Atrn	-0.16476	9.36676	-4.09517	0.000936343	0.00797155	-0.857579
Ptpra	-0.164654	7.61911	-4.55235	0.000371707	0.00442892	0.054747
Erc1	-0.164549	6.09395	-3.40663	0.00385369	0.0203911	-2.18592
Upf1	-0.164483	6.5036	-4.48389	0.000426345	0.00485063	-0.0519558
Nsdhl	-0.164469	5.67117	-2.99058	0.00906147	0.0367625	-2.96551
Plxdc2	-0.164396	6.7901	-3.23396	0.00549986	0.0261377	-2.57729
Tomm40	-0.164293	6.14379	-4.19967	0.000756929	0.00698242	-0.596028
Chst11	-0.164151	6.03316	-3.06815	0.00773134	0.0329176	-2.85276
Csnk1g2	-0.164133	6.83123	-3.7408	0.0019356	0.0129736	-1.55995
Yipf2	-0.163886	4.79827	-3.76562	0.00183926	0.0125404	-1.31595
Swi5	-0.163868	6.04416	-4.82764	0.000215175	0.0031612	0.654124
Lrrc59	-0.163675	5.38794	-3.26982	0.00510859	0.0248821	-2.38078
Eif4e2	-0.16356	4.39554	-2.99701	0.00894308	0.0364613	-2.75873
Rps24	-0.163451	7.1352	-4.05226	0.00102202	0.00842723	-0.939925
Trim8	-0.163287	6.69142	-3.16106	0.00638927	0.0289253	-2.71776
Gipc1	-0.163271	5.76317	-2.88823	0.0111648	0.0424169	-3.17526
Rab8a	-0.163224	5.61166	-3.55982	0.00281002	0.0165197	-1.83006
Itsn1	-0.163169	7.1735	-3.07024	0.00769829	0.0328036	-2.91461
Ski	-0.163006	6.53062	-3.0977	0.00727685	0.0315223	-2.83427
MGC109340	-0.162822	5.51263	-2.81855	0.012862	0.0468646	-3.27858
Puf60	-0.162639	7.18387	-4.49767	0.000414725	0.0047818	-0.0476294
Fgfr1	-0.162618	7.64016	-4.8211	0.000217968	0.00318467	0.585537
Pycr2	-0.16259	4.70262	-3.10912	0.00710829	0.0309892	-2.59522
Nudc	-0.162458	4.89157	-2.91239	0.0106289	0.041028	-3.00687
Tmub1	-0.162453	4.65183	-3.30241	0.00477693	0.0237316	-2.20912
Mapk3	-0.162262	7.37594	-3.17753	0.00617666	0.0283312	-2.70622
Krtcap2	-0.162145	4.85781	-2.8665	0.0116692	0.0437393	-3.08939
Lamtor5	-0.161985	4.88541	-3.31632	0.00464202	0.0232457	-2.21827
Cog4	-0.161951	6.10773	-3.71921	0.00202351	0.0133402	-1.55911
Nbeal2	-0.161036	4.92818	-3.45563	0.00348337	0.0190848	-1.94933
Hikeshi	-0.160537	4.62706	-2.90079	0.0108829	0.0416899	-2.98421
Sft2d1	-0.160016	4.65288	-2.97838	0.00929018	0.0374187	-2.83984
Vopp1	-0.159914	6.00489	-3.01977	0.0085364	0.0353274	-2.94496
Ncam1	-0.159863	9.63926	-3.79424	0.00173416	0.012101	-1.46181
Hyou1	-0.159839	7.43724	-2.92521	0.0103548	0.040388	-3.2049
Rab28	-0.159268	6.41138	-4.20747	0.000745032	0.00692592	-0.598812
Ptges3	-0.159219	7.20515	-3.61047	0.00253145	0.0154471	-1.83394
Med9	-0.159074	4.23061	-3.12377	0.00689774	0.0302735	-2.48571
Rfwd2	-0.158942	5.7854	-3.22285	0.00562708	0.0264851	-2.52154
Zak	-0.158613	4.96095	-3.0063	0.00877486	0.0360082	-2.83675
Cisd2	-0.158171	6.68682	-4.42785	0.00047717	0.00524884	-0.17218
Txndc12	-0.158062	5.29383	-2.98713	0.00912568	0.0369652	-2.92317
Trim9	-0.158007	6.42136	-3.01387	0.00864005	0.0356053	-2.99212
Slc22a17	-0.157799	9.66553	-3.37982	0.00407264	0.0212717	-2.29716
Top1	-0.157754	6.0939	-3.18177	0.00612306	0.0281266	-2.63407
Aldh5a1	-0.157658	8.17624	-3.53216	0.00297489	0.0170879	-2.00267
Tmem47	-0.157611	7.47806	-3.07434	0.00763379	0.032669	-2.91253
Smim19	-0.15749	5.78792	-3.31695	0.00463604	0.0232232	-2.33484
Rpl36	-0.157203	6.24135	-3.01781	0.00857081	0.0354136	-2.97043
RGD1564541	-0.157011	4.9067	-2.96096	0.00962668	0.0383989	-2.91578
Flii	-0.15696	7.14648	-3.83491	0.00159514	0.0114197	-1.37913
Nab1	-0.156959	5.44539	-3.27153	0.0050906	0.0248409	-2.38469
Prrc1	-0.156804	5.03127	-3.40846	0.00383917	0.0203371	-2.0576
Rgs12	-0.156728	5.30766	-3.03943	0.00819974	0.0343511	-2.82319
Ivd	-0.156469	6.42901	-3.48005	0.00331231	0.0184444	-2.06485
Nfkb1	-0.156307	5.3358	-2.88333	0.0112766	0.0426451	-3.12999
Mrpl28	-0.156177	5.09988	-3.50353	0.00315581	0.0178328	-1.87854
RGD1303003	-0.156075	6.47797	-3.45764	0.00346899	0.019046	-2.11315
Trappc12	-0.156061	6.32334	-3.07137	0.00768042	0.0327542	-2.8718
Ctsd	-0.156038	8.70536	-2.90099	0.0108785	0.0416833	-3.25715
Ndufb3	-0.155757	5.99891	-2.91549	0.010562	0.0408929	-3.14792
RGD1309676	-0.155393	6.09495	-2.98596	0.00914738	0.0370149	-3.01987
Phb	-0.155371	6.36334	-4.27996	0.000643177	0.00633454	-0.45067
Cdc40	-0.154879	4.70628	-3.22893	0.00555711	0.0262981	-2.36202
Blvrb	-0.1547	4.55646	-2.87689	0.0114252	0.0430822	-3.01745
Abcd3	-0.154688	7.09908	-2.94551	0.00993501	0.0392588	-3.15781
Glrx5	-0.154199	5.42749	-2.84699	0.0121409	0.045012	-3.21255
Rfk	-0.154085	5.47194	-2.92126	0.0104384	0.0405851	-3.07519
Tex261	-0.153982	5.82051	-2.83235	0.0125071	0.0459668	-3.28971
Drd2	-0.153916	4.59892	-2.79443	0.013506	0.0484559	-3.18158
Rundc1	-0.15384	5.55386	-2.89151	0.0110905	0.0422092	-3.1434
Tspan3	-0.1538	8.69437	-4.57621	0.000354391	0.00428994	0.100184
Rpl37a	-0.152445	6.9066	-3.83869	0.0015828	0.0113538	-1.36489
Mrpl12	-0.152429	5.55087	-3.18419	0.00609267	0.0280307	-2.57069
Hsd17b4	-0.152267	6.83195	-3.57286	0.00273546	0.0162243	-1.89896
Spcs2	-0.151361	6.73454	-3.21541	0.00571387	0.026773	-2.6119
[truncated: 189 more rows]
