# Supplementary material
Source: Research Square preprint supplement (doi:10.21203/rs.3.rs-9685636/v1)
Supplement: Supplementary file 1 [file 4a3568de1839aae839f826b8.docx]

**Supplementary Figures**

**
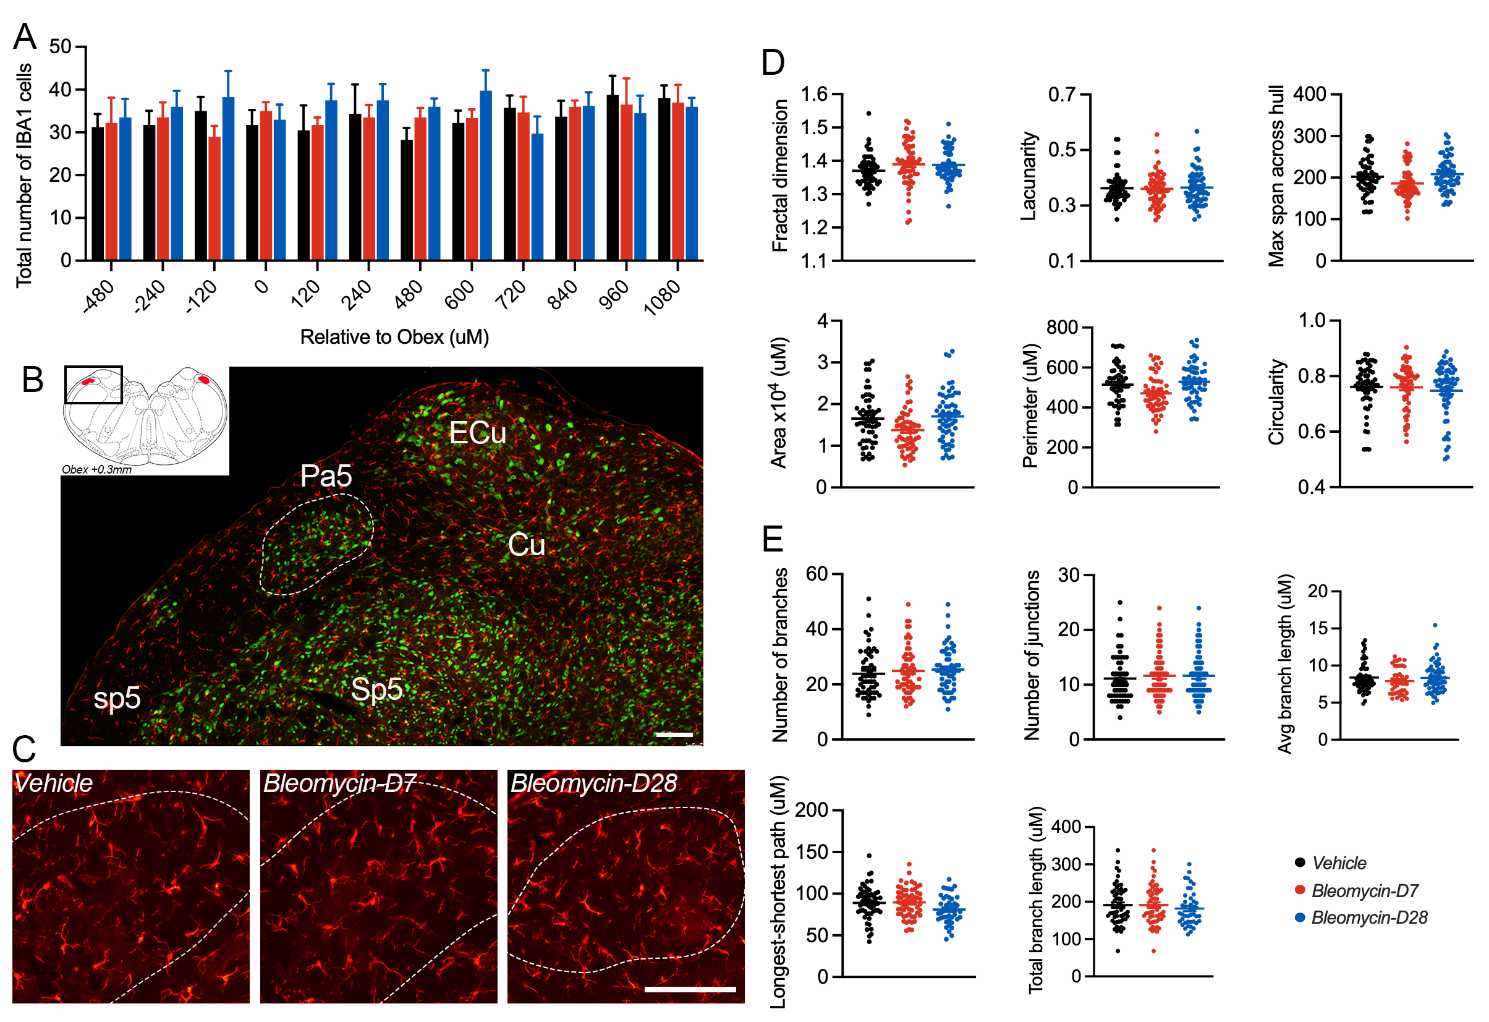
**

**Figure E1. *Morphometric analysis of paratrigeminal nucleus (Pa5) microglia following bleomycin-induced lung injury.*** (A) Quantification of IBA1-stained microglia across rostrocaudal levels of the Pa5 in vehicle- (black; N = 5) and bleomycin-treated rats (day 7, orange; N = 4 and day 28, blue; N = 5). (B) Representative photomicrograph image of the Pa5 (dotted line demarcating the borders) and corresponding atlas line diagram (insert, red shading) at obex +0.3 mm, demonstrating the area used for subsequent single-cell microglia morphometric analysis. The white box represents the vehicle-treated rat magnified image shown in panel C. Neurons are immunostained with NeuN (green) and microglia are immunostained with IBA1 (red). (C) Representative images showing IBA1-stained microglia in the Pa5 of vehicle- and bleomycin-treated rats at day 7 (Bleomycin-D7) and day 28 (Bleomycin-D28). Dot plot graphs show (D) fractal analysis measuring fractal dimension, lacunarity, maximum span across hull, area, perimeter, and circularity per microglial cell and (E) skeletal analysis measuring the number of branches, number of junctions, average (Avg) branch length, longest-to-shortest path, and total branch length. No significant morphometric differences were detected between vehicle- and bleomycin-treated groups. Data are presented as mean ± SEM. Statistical comparisons were performed using either one-way ANOVA (Dunnett’s) or Kruskal–Wallis test (Dunn’s), as appropriate.

**
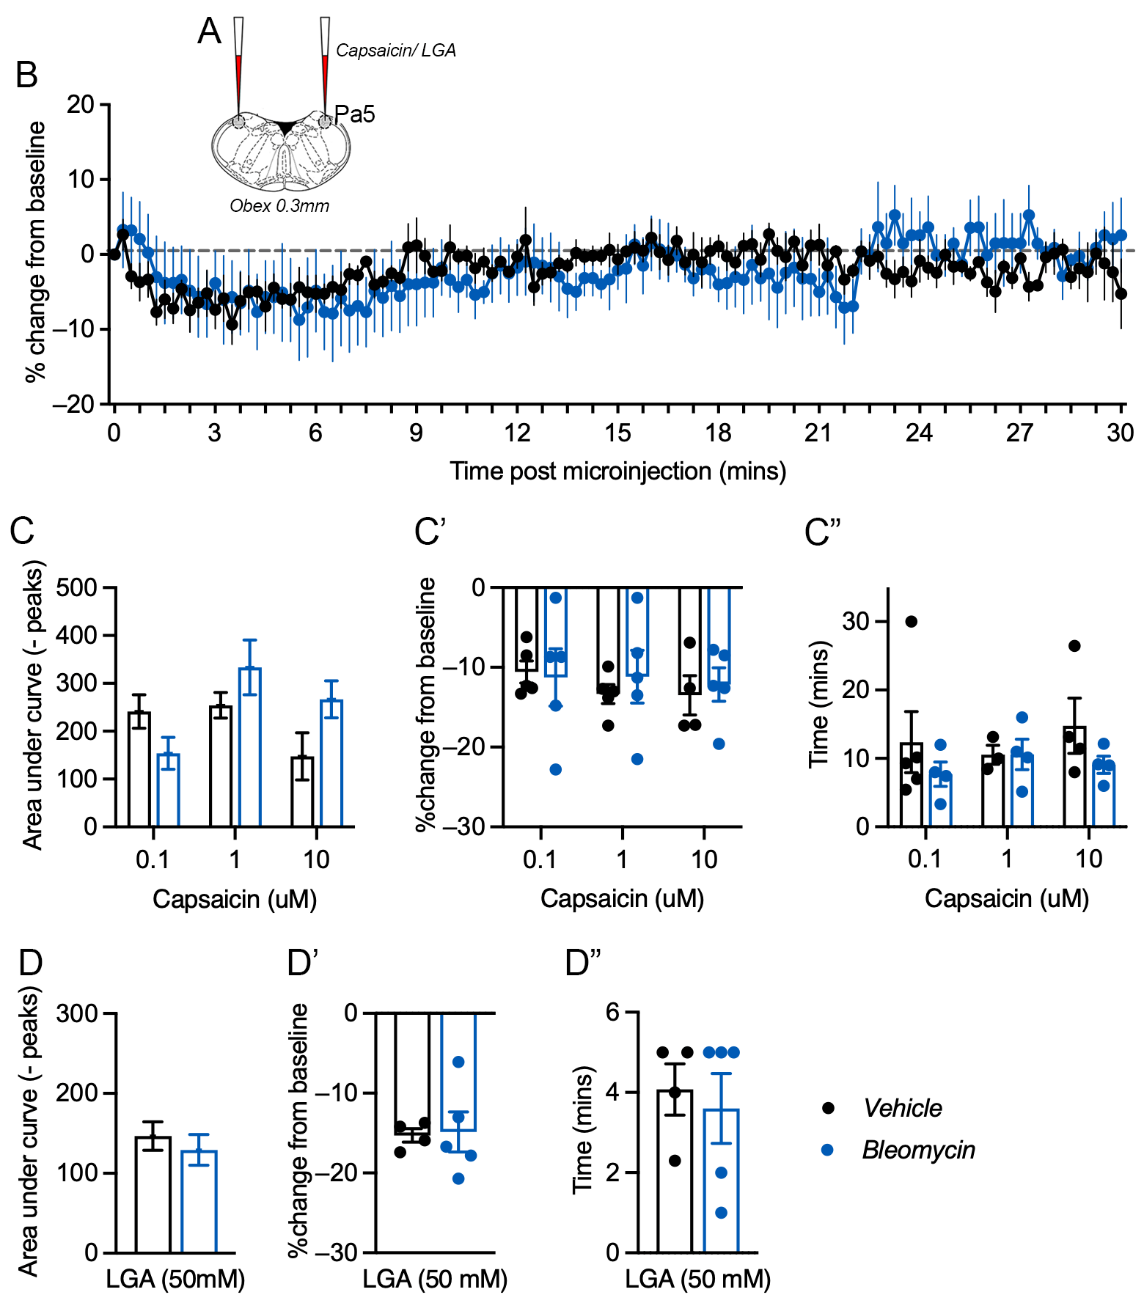
**

**Figure E2. *Functional responsivity of the paratrigeminal nucleus (Pa5) following bleomycin-induced lung injury.*** (A) Schematic of experimental design whereby rats that received either vehicle or 7.5 mg/ kg bleomycin intratracheally underwent bilateral microinjections of either capsaicin or L-glutamic acid (LGA) into the Pa5 at day 28. (B) Example quantification of changes in respiratory frequency over time following bilateral microinjection of capsaicin into the Pa5 in vehicle- and bleomycin-treated rats. Quantification of respiratory responses is shown as (C, D) area of negative peaks (area under the curve), (C′, D′) maximum response, and (C′′, D′′) time taken for respiratory rate to return to baseline (time to recovery) following microinjection of capsaicin (0.1, 1, 10 μM) or LGA (50 mM), respectively. No significant differences were observed between vehicle- and bleomycin-treated animals, indicating that bleomycin-induced functional deficits were not evident in the Pa5. Data are presented as mean ± SEM.
