# Supplementary material
Source: Research Square preprint supplement (doi:10.21203/rs.3.rs-9685636/v1)
Supplement: Supplementary file 3 [file 4f7361716c85d6b68c135745.xlsx]

## Sheet: QC
Sample name	Total reads	Paired reads mapped to genome	Percentage of paired reads mapped to genome	Paired reads mapped to one feature	Percentage of paired reads mapped to one feature	Paired mapped reads not mapped to any known feature	Percentage of paired reads that mapped to the genome but not to any known feature
AM25_NTS_D7_V	25167671	20334259	0.808	15922014	0.6326	4326748	0.1719
AM26_NTS_D7_V	25248331	19295110	0.7642	15020458	0.5949	4165622	0.165
AM27_NTS_D7_V	31436952	24228371	0.7707	19313964	0.6144	4791007	0.1524
AM28_NTS_D7_V	35096820	27713746	0.7896	21502695	0.6127	6083657	0.1733
AM29_NTS_D7_V	33351924	26682979	0.8	21005601	0.6298	5559341	0.1667
AM30_NTS_D7_V	38320831	29913753	0.7806	23519701	0.6138	6248780	0.1631
AM31_NTS_D7_B	33074777	25931139	0.784	19695995	0.5955	6118555	0.185
AM32_NTS_D7_B	33518416	26519904	0.7912	20136640	0.6008	6269400	0.187
AM33_NTS_D7_B	23915949	18995080	0.7942	14297985	0.5978	4612434	0.1929
AM34_NTS_D7_B	23147863	17930873	0.7746	13499926	0.5832	4341390	0.1876
AM35_NTS_D7_B	28806066	22709838	0.7884	17237504	0.5984	5379083	0.1867
AM36_NTS_D7_B	34514439	26484794	0.7674	19906266	0.5768	6457831	0.1871
AM37_NTS_D28_V	34941849	27610510	0.7902	21659935	0.6199	5819547	0.1665
AM38_NTS_D28_V	37317914	29073492	0.7791	22403478	0.6003	6537946	0.1752
AM39_NTS_D28_V	34390744	26716822	0.7769	21194881	0.6163	5380440	0.1565
AM40_NTS_D28_V	36463253	28731083	0.7879	22885037	0.6276	5686577	0.156
AM41_NTS_D28_V	21779423	17198890	0.7897	13508206	0.6202	3603140	0.1654
AM42_NTS_D28_V	24177086	18725923	0.7745	14676470	0.607	3948115	0.1633
AM43_NTS_D28_B	33459696	27061958	0.8088	21477198	0.6419	5472575	0.1636
AM44_NTS_D28_B	34775984	26624992	0.7656	21154211	0.6083	5339500	0.1535
AM45_NTS_D28_B	32439822	25425087	0.7838	19894183	0.6133	5402036	0.1665
AM46_NTS_D28_B	34666372	26759286	0.7719	20940188	0.604	5686554	0.164
AM47_NTS_D28_B	36712310	28278616	0.7703	22395234	0.61	5712173	0.1556
AM48_NTS_D28_B	34158531	26649804	0.7802	20183561	0.5909	6333158	0.1854
Legend:
NTS - nucleus of the solitary tract
D7 - day 7 post treatment
D28 - day 28 post treatment
V - Vehicle
B - Bleomycin
