# Supplementary material
Source: Research Square preprint supplement (doi:10.21203/rs.3.rs-9685636/v1)
Supplement: Supplementary file 4 [file 66ff2915884044e6e563f63f.xlsx]

## Sheet: enrichment_results_wg_result177
geneSet	description	link	enrichmentScore	normalizedEnrichmentScore	pValue	FDR	size	plotPath	leadingEdgeNum	leadingEdgeId	userId
GO:0035249	synaptic transmission, glutamatergic	http://amigo.geneontology.org/amigo/term/GO:0035249	0.465894	2.10748	0	0.00516109	100	./Project_wg_result1777002351_GSEA/GO_0035249.png	40	29627;688705;29628;24409;287476;24418;24414;29290;25017;25559;140908;25248;58942;29431;54257;25558;25398;84347;29642;25472;29595;24408;24166;81821;60590;64829;24592;116638;286932;25716;84487;84360;361927;286931;29559;170796;298521;29546;24957;171393	Abcc8;Adcyap1;Adora1;Cacna1a;Cacnb4;Cacng2;Cdk5;Clcn3;Clstn3;Cnr1;Dgki;Dgkz;Fxr1;Glul;Gria2;Gria3;Grik1;Grik2;Grik3;Grin1;Grin2a;Grin3b;Grm1;Grm5;Grm8;Homer1;Htr2a;Kcnj8;Myo5a;Nf1;Pak1;Slc17a6;Slc17a7;Slc38a2;Stxbp1;Syt1;Unc13a;Unc13c;Vps54;Zzef1
GO:0099003	vesicle-mediated transport in synapse	http://amigo.geneontology.org/amigo/term/GO:0099003	0.421391	2.09565	0	0.00419339	213	./Project_wg_result1777002351_GSEA/GO_0099003.png	83	81022;287110;171574;63851;315311;100361138;56768;59267;116839;361651;114486;117556;117596;25624;140908;58942;29748;24923;79130;63843;29643;25558;259269;311848;297566;368044;25398;81802;24675;24242;84590;85238;297797;29704;314641;25731;64832;499073;299971;83589;116657;26989;116482;25012;24681;64829;114114;65178;25272;84018;117028;83721;116638;171571;83709;25716;24805;60567;84487;84360;312694;84556…	Apba1;Apba2;Arfgap3;Atp6v1b2;Atp6v1c1;Atp6v1d;Atp6v1e1;Atp6v1g2;Atp6v1h;Bin1;Braf;Brsk1;Cacna1a;Cacnb4;Cadps;Calm1;Cdk5;Clcn3;Cltc;Cplx1;Cplx2;Dgkq;Dnajc5;Dnm1;Dnm1l;Dnm3;Doc2a;Dvl1;Erc2;Fgf14;Git1;Git2;Grip2;Gripap1;Hpca;Magi2;Mapk10;Ncs1;Necap1;P2ry4;Pacsin1;Pclo;Pip5k1c;Ppp3cb;Ppp3cc;Ppp3r1;Prepl;Prkcb;Prkcg;Prrt2;Rab27b;Rims1;Rims2;Rph3a;Sacm1l;Scamp5;Sh3gl2;Sh3glb2;Slc17a6;Slc17a7;Slc4a8;Sna…
GO:0006836	neurotransmitter transport	http://amigo.geneontology.org/amigo/term/GO:0006836	0.409544	1.99014	0	0.0109673	187	./Project_wg_result1777002351_GSEA/GO_0006836.png	61	192363;81022;688705;63840;315311;56768;59267;116839;361651;114486;117556;25624;25559;282712;58942;29431;24923;63843;29643;25558;259269;84685;116508;171148;25398;81802;24242;29642;60423;25472;85238;63997;613226;25731;64832;499073;50690;83589;116657;60590;26989;25012;24681;64829;114114;65178;83721;24592;116638;83709;310738;25716;24805;60567;84487;289727;84556;25130;304546;65153;29464	Abcc8;Apba1;Braf;Brsk1;Cacna1a;Cacnb4;Cadps;Calm1;Cplx1;Cplx2;Dgki;Dnm1l;Dvl1;Erc2;Git1;Git2;Grm8;Kcnj8;Nat8l;Ncs1;Nf1;Ngf;Nos1ap;Nrxn3;P2ry4;Pak1;Pclo;Per2;Ppp1r9a;Prkcg;Prrt2;Rims1;Rims2;Slc17a6;Slc17a7;Slc28a2;Slc29a1;Slc38a2;Slc4a8;Slc6a15;Slc6a17;Slc6a5;Slc6a6;Slc6a8;Snap25;Snap91;Stx1b;Stx2;Stx3;Stxbp1;Stxbp5;Sv2b;Sv2c;Synj1;Syt1;Syt10;Syt2;Syt3;Syt7;Unc13a;Vamp1
GO:0019233	sensory perception of pain	http://amigo.geneontology.org/amigo/term/GO:0019233	0.47032	1.96145	0	0.0114512	67	./Project_wg_result1777002351_GSEA/GO_0019233.png	24	63887;24409;29256;287424;24414;29290;81574;25468;140908;29386;24520;29237;25590;65199;24772;29595;24408;29335;60590;116590;64053;116489;54239;310738	Adora1;Aloxe3;Cdk5;Chrna4;Chrnb2;Cxcl12;Dlg2;Grin1;Grin2a;Grm1;Grm8;Htr2a;Kcna1;Kcna2;Kcnip3;Kcnk4;Mapk1;Mecp2;Ngf;Nmu;Oprk1;Oprl1;Penk;Scn1a
GO:0042391	regulation of membrane potential	http://amigo.geneontology.org/amigo/term/GO:0042391	0.354333	1.87255	0	0.0263216	351	./Project_wg_result1777002351_GSEA/GO_0042391.png	123	192363;29627;501039;688705;287110;29628;63851;24409;25592;315311;307206;24225;192647;689560;56768;84027;140448;116600;29710;171146;170848;24418;116839;24246;25560;24414;29290;24766;81574;25468;81653;140908;25248;362950;24674;29386;58942;24520;24923;315611;79146;294715;54257;25590;84685;25451;84008;140933;29709;25398;84347;114862;24242;170739;25472;63997;24781;24239;24922;24408;64553;24166;246153;…	Abcc9;Adcyap1;Adora1;Adra1a;Agrn;Akap6;Akap9;Ank3;Atp1b1;Bdnf;Begain;Bid;Bin1;Bnip3;Cacna1a;Cacna1c;Cacna1h;Cacna1i;Cacnb2;Cacnb4;Cacng2;Calm1;Camk2d;Cdk5;Chrna4;Chrna7;Chrnb2;Chrne;Clcn1;Cnr1;Cntnap1;Crtc1;Dbn1;Dgki;Dpp6;Dvl1;Edn1;Fgf12;Fgf14;Gabra5;Gabrb2;Gabrb3;Gabrg2;Gclc;Glrb;Glrx;Got1;Gria2;Gria3;Grik1;Grik2;Grik3;Grin1;Grin2a;Grin3b;Grm1;Grm5;Gsk3b;Htr3a;Kcna1;Kcna2;Kcnab2;Kcnc1;Kcnc2;Kcne…
GO:0099565	chemical synaptic transmission, postsynaptic	http://amigo.geneontology.org/amigo/term/GO:0099565	0.420659	1.86236	0	0.0244077	99	./Project_wg_result1777002351_GSEA/GO_0099565.png	33	29627;688705;287110;29628;24409;307206;24225;56768;84027;140448;116839;24414;29290;81653;140908;24674;29386;24923;79146;54257;25590;84685;63997;24922;24408;83721;116638;54239;84556;314721;25456;25041;29559	Adora1;Anks1b;Bdnf;Begain;Cdk5;Chrna4;Chrnb2;Dbn1;Dgki;Dvl1;Gabrb3;Glrb;Gria2;Gria3;Grik1;Grik2;Grin1;Grin2a;Grm1;Gsk3b;Mecp2;Neto1;P2rx6;Pclo;Ppp1r9a;Ppp3ca;Rims1;Rims2;Slc17a7;Slc29a1;Slc8a3;Stx1b;Tbc1d24
GO:0099177	regulation of trans-synaptic signaling	http://amigo.geneontology.org/amigo/term/GO:0099177	0.345407	1.85398	0	0.0223955	442	./Project_wg_result1777002351_GSEA/GO_0099177.png	127	29627;50658;81022;688705;63887;116554;287110;29628;63851;24409;25592;315311;307206;24225;293056;287476;309510;56768;84027;140448;83840;81648;59267;25050;170848;24418;116839;361651;24414;29290;114486;81645;117556;29461;25017;81653;140908;25248;24674;29386;58942;29748;84550;29431;24923;24245;83572;192213;63843;29237;29643;54257;25558;259269;25590;50687;84685;116508;25398;81802;84347;171051;24242;29…	Adcyap1;Adora1;Adra1a;Agrn;Akap12;Apba1;Atp2b2;Bdnf;Bhlhe40;Braf;Brsk1;Cabp1;Cacna1a;Cacnb4;Cacng2;Calm1;Camk2b;Camk2g;Camk4;Cdk5;Chrm2;Chrna4;Chrnb2;Cnr1;Cpeb1;Cpeb3;Cplx1;Cplx2;Crh;Crtc1;Dbn1;Dgki;Dgkz;Dlgap2;Dnm1l;Dvl1;Edn1;Epha4;Epha7;Erc2;Fgf14;Fxr1;Git1;Git2;Gnal;Gria2;Gria3;Grid2ip;Grik1;Grik2;Grik3;Grin1;Grin2a;Grin3b;Grm1;Grm5;Grm8;Gsk3b;Htr2a;Jph3;Kcnq2;Kcnq3;Kras;L1cam;Lrrc4c;Lrrtm2;Ma…
GO:0070050	neuron cellular homeostasis	http://amigo.geneontology.org/amigo/term/GO:0070050	0.457112	1.84631	0	0.0215314	58	./Project_wg_result1777002351_GSEA/GO_0070050.png	21	116600;29290;117556;117596;140908;25248;58942;84550;63843;259269;297566;368044;25398;297797;24408;24215;299971;65248;116638;84360;65153	Adora1;Atp2b2;Atp6v1b2;Atp6v1c1;Atp6v1e1;Atp6v1g2;Atp6v1h;Cacna1a;Cacnb2;Cacnb4;Cdk5;Clcn3;Cnr1;Erc2;Grin1;Ncs1;P2ry4;Prkaa1;Slc17a7;Slc24a2;Sv2b
GO:1902414	protein localization to cell junction	http://amigo.geneontology.org/amigo/term/GO:1902414	0.406439	1.806	0	0.0289595	104	./Project_wg_result1777002351_GSEA/GO_1902414.png	37	50658;116554;24409;307206;26295;56768;84027;140908;266777;24923;117284;84392;116508;81802;84347;84590;171500;24408;64832;311024;310519;307035;116482;25012;25272;64053;171571;83709;294917;64845;353230;116493;113970;29546;171393;314906;302983	Cacng2;Cdk5;Clstn3;Cplx1;Dlg2;Git1;Gphn;Grin1;Grin2a;Grip2;Gripap1;Gsk3b;Homer1;Kif3a;Kif5a;Kif5c;Lhfpl4;Lrrc7;Magi2;Mapk10;Mapk8;Mapk8ip3;Mapk9;Mpp7;Neto1;Nptx1;Nrxn3;Ogt;Pclo;Rab27b;Sacm1l;Slitrk3;Snap25;Stau2;Stx1b;Stx3;Tnik
GO:0016570	histone modification	http://amigo.geneontology.org/amigo/term/GO:0016570	0.578519	1.79825	0.0123457	0.028257	19	./Project_wg_result1777002351_GSEA/GO_0016570.png	15	26295;287734;29386;360471;303185;25337;316328;25159;360581;362093;25336;116725;308911;497672;311575	Atxn7l3;Brca1;Flcn;Gata2;Kansl3;Mecp2;Nfyb;Nfyc;Ogt;Phf20;Rrp8;Tada2a;Ube2n;Usp7;Wdr5
GO:0050795	regulation of behavior	http://amigo.geneontology.org/amigo/term/GO:0050795	0.404023	1.68953	0.00195695	0.0495546	70	./Project_wg_result1777002351_GSEA/GO_0050795.png	21	63887;29256;81648;29290;312667;25468;81653;313413;25248;29386;29237;309945;25605;78962;363287;29335;84497;171101;305918;60449;54239	Adora1;Ankrd26;Arrdc3;Chrnb2;Cnr1;Crh;Dbn1;Dgat1;Gnb3;Grp;Hcrtr2;Hdac4;Ift88;Kcna2;Mecp2;Nmu;Oprk1;Oprl1;Penk;Per3;Sgip1
GO:0048545	response to steroid hormone	http://amigo.geneontology.org/amigo/term/GO:0048545	-0.287324	-1.49369	0	0.0499293	328	./Project_wg_result1777002351_GSEA/GO_0048545.png	112	79558;81517;170816;64639;25315;171355;295279;24267;170897;64317;25374;25737;308390;24468;25244;79128;24699;114244;361338;24230;25662;84022;100361376;24479;25054;78968;85385;25426;315769;29242;58949;25644;64041;59086;366214;362361;65028;81810;29260;315196;296083;29542;63868;64304;29393;25591;117287;683626;293024;29134;394266;317675;64306;29687;24252;246097;25117;363481;83618;24890;84482;363836;113…	Acadm;Acads;Acsbg1;Acsl6;Acvr1;Agl;Aif1;Akap13;Alad;Aldh2;Alpl;Anxa3;Aqp4;Atp1a1;Atp1a2;Axin2;Bad;Bckdha;Bckdhb;Birc5;Bmp6;C1qb;C3;Calr;Car4;Ccnd1;Ccnd2;Cd38;Cebpa;Col1a1;Comt;Ctsl;Cyba;Cyp1b1;Cyp7b1;Dab2;Ddrgk1;Dnaja1;Ephx1;Esr1;Fas;Fcgr1a;Fech;Fkbp4;Fkrp;Foxo1;Ggcx;Ghr;Ghsr;Gjb2;Glb1;Gper1;Gpx3;Hcn2;Hdac1;Hdac8;Hmgcs2;Hnrnpa2b1;Hsd11b2;Hsd17b4;Hspa8;Hspd1;Idh1;Igf1;Igfbp2;Jun;Kank2;Kcnj10;Lbh;L…
GO:0030522	intracellular receptor signaling pathway	http://amigo.geneontology.org/amigo/term/GO:0030522	-0.301156	-1.49434	0	0.0499739	212	./Project_wg_result1777002351_GSEA/GO_0030522.png	72	24468;361730;79128;246239;100361376;304545;303350;25054;78968;293624;29337;315769;25554;364594;301227;58923;317468;65028;684440;301059;29260;65041;296083;499801;311430;295338;25591;117287;683626;315599;54287;192281;246280;171121;306182;362050;24890;364405;501095;171164;252917;312495;287362;499420;361289;65190;362809;303538;24706;58851;113984;245980;140868;24482;171104;296162;29753;303090;316794;3…	Aldh1a2;Alox15;Banf1;Brcc3;Calr;Clpb;Colec12;Cyp26b1;Cyp7b1;Dab2;Ddrgk1;Dhrs3;Dhx58;Dnaja1;Eif2ak2;Esr1;Fabp5;Fkbp4;Gbp2;Gbp5;Gper1;Hdac1;Hspa8;Ifih1;Igf1;Ipo5;Irf7;Irgm;Kank2;Lbh;Mavs;Mefv;Myd88;Nlrp3;Nlrx1;Nr1d1;Nr1h2;Nr2f2;Nr2f6;Ntrk2;Oas1a;Oasl;Padi2;Park7;Parp1;Plcg2;Ppp6c;Prmt2;Ptges3;Ptpn22;Rab7b;Rarb;Rftn1;Rhoa;Rnf135;Rsad2;Scara3;Slc15a3;Slc15a4;Snai2;Srebf1;Tkfc;Tlr3;Tlr4;Tlr7;Tlr8;Trem…
GO:0006749	glutathione metabolic process	http://amigo.geneontology.org/amigo/term/GO:0006749	-0.406025	-1.50017	0.0327553	0.0481892	41	./Project_wg_result1777002351_GSEA/GO_0006749.png	19	29487;83619;66028;360994;300850;116684;24479;24424;117287;24962;310392;24440;24404;24423;297029;24786;25260;171341;313520	Arl6ip5;Chac2;Cth;Gpx1;Gsta4;Gstk1;Gstm1;Gstm2;Gstt1;Gstt2;Hbb;Idh1;Mgst1;Mmachc;Nfe2l2;Oplah;Park7;Slc7a11;Sod1
GO:0002347	response to tumor cell	http://amigo.geneontology.org/amigo/term/GO:0002347	-0.457142	-1.50242	0.0632411	0.0475825	23	./Project_wg_result1777002351_GSEA/GO_0002347.png	8	25496;59086;63868;29338;303476;366126;308417;89783	Abi3;Hspd1;Laptm5;Nectin2;Notch1;Prdx2;Spi1;Tgfb1
GO:0043410	positive regulation of MAPK cascade	http://amigo.geneontology.org/amigo/term/GO:0043410	-0.289864	-1.50351	0	0.0474811	296	./Project_wg_result1777002351_GSEA/GO_0043410.png	97	116457;79128;282843;500047;113959;24699;287722;25054;362550;85385;29337;24483;24553;364594;303285;312477;84426;301227;25496;59086;294557;25265;83501;301059;25267;29260;315196;170538;295338;360622;24318;293024;54287;306760;25599;29665;84348;306782;25083;60628;58960;140585;25155;246331;291005;685781;24890;50689;29338;303039;29302;308869;66018;291084;64465;25728;366126;81823;114495;24932;25235;24482…	Ackr3;Adam17;Adra2a;Agt;Akap13;Alox15;Apoe;Arhgap8;Bcar3;C3;C5ar1;Casr;Cd4;Cd74;Cdc42;Cdh2;Cdon;Chi3l1;Cib1;Ctnnb1;Cxcr4;Dab2;Ddr2;Dok1;Dok3;Drd2;Eif2ak2;Esr1;Fgfr1;Gadd45g;Ghr;Gnai2;Gper1;Igf1;Igf2;Igfbp4;Ilk;Itgb3;Jun;Lamtor1;Laptm5;Map2k2;Map2k6;Map3k5;Mapk3;Mapk8ip1;Met;Mt3;Myd88;Ndst1;Ngfr;Nkd1;Notch1;Nqo2;Nrp1;Ntrk2;P2rx7;P2ry1;P2ry6;Pdgfd;Pdgfra;Plcg2;Prdx2;Prkcd;Psap;Ptpn22;Ptprc;Rap1a;Ra…
GO:0071216	cellular response to biotic stimulus	http://amigo.geneontology.org/amigo/term/GO:0071216	-0.318111	-1.50705	0.00186567	0.0466627	161	./Project_wg_result1777002351_GSEA/GO_0071216.png	58	65161;361794;94201;81818;24230;84022;497942;171569;29337;58949;25644;301227;25496;60350;301059;29260;25617;295338;117287;171056;64026;81743;364867;25155;362050;155012;171164;50689;29338;170900;316327;252917;287362;359727;25752;25528;291359;24586;364674;366126;294706;304966;102554393;297995;81515;64467;303090;24450;314870;79114;310553;365037;117273;313564;171155;289196;29452;50672	Adamts13;Arid5a;Bmp6;Bysl;Casp7;Cd14;Cd180;Cd6;Cdk4;Cfh;Chmp5;Cx3cr1;Cxcl16;Ednrb;Entpd2;Epas1;Fcgr3a;Fgfr1;Gbp2;Gbp5;Ghsr;Hadhb;Hmgcs2;Hspa5;Irak3;Irgm;Litaf;Ly86;Lyn;Mapk3;Myd88;Ncam1;Nfkbil1;Nlrp3;Notch1;Nr1d1;Park7;Pde2a;Plcg2;Prdx2;Ptafr;Ptpn22;Rbm14;Rhoa;Sash1;Sirpa;Spi1;Spon2;Syk;Ticam2;Tifab;Tlr2;Tlr4;Tmco1;Trem2;Tspo;Vim;Zmpste24
GO:0042180	cellular ketone metabolic process	http://amigo.geneontology.org/amigo/term/GO:0042180	-0.321271	-1.50773	0.00192308	0.046663	152	./Project_wg_result1777002351_GSEA/GO_0042180.png	51	313020;79128;59295;84022;25126;79122;78968;688283;191574;365571;25644;84426;85239;309004;117287;25599;140586;25256;25117;316976;25322;313706;83618;252917;310392;304078;301024;291084;171445;58851;140868;25502;266686;25287;24314;498909;24179;81716;293023;171548;363516;85489;25045;25233;63864;404280;25757;25363;690163;171400;50672	Abcd1;Acadl;Acadvl;Afmid;Agt;Akr1c14;Akr7a2;Akt2;Bmp6;Cbr3;Cd74;Coq9;Cpt1a;Dab2;Dbi;Dhrs4;Dkk3;Ednrb;Elovl5;Etfbkmt;Fabp5;Fdxr;Fmo1;Ggcx;Ghsr;Hsd11b2;Hsd17b1;Hsd17b10;Klhl25;Mid1ip1;Mlycd;Nqo1;Nqo2;Nr1d1;Nr1h2;Nucb2;Oaz1;Oxct1;Park7;Rest;Scap;Slc7a11;Sox9;Srebf1;Stat5b;Twist1;Tysnd1;Ubiad1;Vkorc1;Wdtc1;Wnt4
GO:0045785	positive regulation of cell adhesion	http://amigo.geneontology.org/amigo/term/GO:0045785	-0.301361	-1.51214	0	0.0451717	260	./Project_wg_result1777002351_GSEA/GO_0045785.png	84	24771;79128;361568;24699;171356;25662;25126;25109;24483;58949;317578;686310;83502;84426;56646;56083;59086;54260;306941;25670;64387;81810;25097;155151;63868;317470;295338;294269;25368;499443;25599;369016;81778;360546;29271;65142;25155;246331;81523;309684;289026;292401;308995;25631;29302;287362;291445;498666;64465;25338;25752;316369;25528;140588;29186;294797;81823;364712;680419;24932;24482;499593;3…	Ada;Adk;Aif1;Alox15;Arl2;B2m;Calr;Carmil1;Ccdc80;Cd1d1;Cd4;Cd6;Cd63;Cd74;Cdc42;Cdh1;Cfl1;Cib1;Coro1a;Dab2;Dag1;Efnb3;Egfl6;Emp2;Ephb4;Foxc2;Gli3;Hsd17b12;Hspd1;Hyal1;Igf1;Igf2;Igfbp2;Il15;Il7r;Ilk;Irgm;Itgal;Itgb2;Itgb3;Itpkb;Jup;Klhl25;Lgals1;Lims1;Megf10;Myadm;Myoc;Nck2;Ninj1;Nlrp3;Nrp1;P4hb;Pdpn;Pld2;Prex1;Ptafr;Ptn;Ptpn22;Ptpn6;Ptprc;RT1-Da;Rhoa;Rras;Rsu1;S100a10;Sash3;Sdc4;Sirpa;Smad3;Smoc2;…
GO:0019221	cytokine-mediated signaling pathway	http://amigo.geneontology.org/amigo/term/GO:0019221	-0.312365	-1.52294	0.0019802	0.0417107	216	./Project_wg_result1777002351_GSEA/GO_0019221.png	79	245983;156767;25145;297520;305340;64639;362491;170897;252961;311580;312688;63836;498951;361673;363938;311786;24699;304545;25126;293624;686326;287444;287707;690369;312477;301227;25496;25670;301059;287818;499801;311430;498434;114203;171056;499443;25599;84348;192281;116477;60628;25639;24252;114709;364867;25155;246097;50689;24508;498666;361035;81814;366126;502872;294797;301737;81823;24932;252963;2523…	Ackr3;Actn4;Adam17;Adipor1;Bad;Ccdc3;Cd24;Cd300lf;Cd4;Cd74;Cebpa;Cib1;Cntfr;Csf3r;Cx3cr1;Cxcr4;Dok1;Eif5a;Fas;Fcer1g;Fer;Fkbp1a;Ghr;Gpr75;Ifih1;Ifitm2;Ifitm3;Ifnar2;Il11ra1;Il13ra1;Il15;Il15ra;Il17ra;Il17rc;Il17rd;Il34;Il7r;Ilk;Irak3;Irf1;Irf7;Irgm;Isg15;Jagn1;Laptm5;Lims1;Lyn;Mapk3;Mavs;Mettl3;Mt3;Myd88;Nkiras2;Notch1;Oas1a;Oas2;Oasl;Padi2;Ptprc;Rbm47;Ripk2;Samhd1;Sh2b2;Sharpin;Sphk1;Spi1;Stat5a…
GO:0061351	neural precursor cell proliferation	http://amigo.geneontology.org/amigo/term/GO:0061351	-0.326667	-1.52438	0.00183486	0.0415769	144	./Project_wg_result1777002351_GSEA/GO_0061351.png	50	25492;29596;292770;25613;360761;25496;29227;59086;29619;83501;315196;24338;24318;171056;499443;497913;60628;315217;140585;84482;64186;282840;25587;117243;24706;29143;140588;680419;24482;499593;81515;25393;362783;170922;83836;114850;79114;305687;81664;117273;24825;79218;50938;307505;84353;25744;24596;24924;80841;25273	Acsl6;Ascl1;Atf5;Bcan;Btg2;Cdh2;Cdon;Ctnna1;Ctnnb1;Cx3cr1;Cxcr4;Drd2;Eml1;Ephb1;Fabp7;Fgfr1;Foxo1;Gjc2;Gli3;Gnai2;Gng5;Grn;Id2;Ifrd1;Igf1;Ilk;Lims1;Lnx2;Lyn;Nde1;Nf2;Nfia;Nfib;Ngfr;Notch1;Plxnb2;Ptn;Ptprz1;Rarb;Rhoa;Rsu1;Ryk;Smo;Sox2;Spint2;Tf;Tgfb1;Wnt7a;Wnt7b;Zfp503
GO:0048645	animal organ formation	http://amigo.geneontology.org/amigo/term/GO:0048645	-0.411424	-1.52541	0.0294118	0.0413813	42	./Project_wg_result1777002351_GSEA/GO_0048645.png	17	25022;85272;353252;287612;25496;81810;81507;29134;58960;50689;140588;171396;79114;360468;79218;24883;84353	Axin2;Bmp7;Bmpr1a;Ctnnb1;Emp2;Fgfr1;Fgfr2;Gli3;Gng5;Map2k2;Mapk3;Mks1;Notch1;Rdh10;Sulf1;Tgfbr2;Wt1
GO:0072348	sulfur compound transport	http://amigo.geneontology.org/amigo/term/GO:0072348	-0.423485	-1.52712	0.0217391	0.0410188	34	./Project_wg_result1777002351_GSEA/GO_0072348.png	9	310392;79213;287532;289175;289443;50567;363516;54315;305131	Abcd1;Lrrc8c;Lrrc8d;Slc19a2;Slc3a2;Slc43a2;Slc6a11;Slc7a11;Ucp2
GO:0018904	ether metabolic process	http://amigo.geneontology.org/amigo/term/GO:0018904	-0.509299	-1.53063	0.0489796	0.0401033	15	./Project_wg_result1777002351_GSEA/GO_0018904.png	9	25315;362732;287380;84470;65030;308718;50671;301265;282634	Agmo;Dhrs7b;Ephx1;Ephx2;Fasn;Gnpat;Pex7;Pla2g7;Pxmp4
GO:1902903	regulation of supramolecular fiber organization	http://amigo.geneontology.org/amigo/term/GO:1902903	-0.303864	-1.53314	0	0.0396751	250	./Project_wg_result1777002351_GSEA/GO_1902903.png	86	24771;24468;81732;282843;297339;315655;100361376;313838;291171;100360501;29480;24553;315121;84426;301227;81917;29474;306941;308765;113940;155151;170538;293024;360854;369016;25230;81778;29271;360950;65142;24170;246331;301709;81523;84577;306575;287419;499702;364206;298584;25631;361617;361422;25420;291926;305494;287876;362918;64465;25728;316369;117183;313024;81814;300030;287375;100910434;301737;6439…	Actg1;Actr3;Add1;Add3;Aebp1;Akap13;Alox15;Apoe;Arap1;Arf6;Arfip1;Arhgap28;Arl2;Arpc5;Arpin;Capg;Capzb;Carmil1;Cdc42;Cdc42ep1;Cdc42ep3;Cdc42ep4;Cfl1;Chadl;Cib1;Ckap2;Clu;Colgalt1;Coro1a;Coro1b;Coro2b;Cotl1;Cryab;Cyfip1;Dapk3;Dstn;Fer;Fkbp4;Flii;Gmfg;Hdac2;Hip1r;Hspa8;Kank1;Kank2;Kank4;Mapre1;Met;Mid1ip1;Mtss1;Myadm;Mylk3;Myoc;Nck2;Nf2;Nrp1;Pdlim4;Pfn1;Plek;Prex1;Prkcd;Rangrf;Rdx;Rgcc;Rgs4;Rhoa;Rhp…
GO:0043586	tongue development	http://amigo.geneontology.org/amigo/term/GO:0043586	-0.549867	-1.53445	0.0403071	0.0395498	14	./Project_wg_result1777002351_GSEA/GO_0043586.png	8	308577;84577;312495;140588;499593;305552;297893;84353	Ctnnb1;Cyp26b1;Fuz;Gli3;Hdac1;Hdac2;Sox2;Wdpcp
GO:0007492	endoderm development	http://amigo.geneontology.org/amigo/term/GO:0007492	-0.408856	-1.53572	0.0189394	0.0394584	44	./Project_wg_result1777002351_GSEA/GO_0007492.png	19	84354;298941;81686;294337;81008;25640;25496;59086;81507;25654;309684;286899;25631;29344;81707;499593;297893;84353;291848	Bmpr1a;Col11a1;Col6a1;Ctnnb1;Hdac1;Hnf1b;Hsbp1;Itga7;Itgb2;Lamb1;Mmp14;Mmp15;Mmp2;Notch1;Smad3;Sox2;Ssbp3;Tgfb1;Zfp36l1
GO:0002237	response to molecule of bacterial origin	http://amigo.geneontology.org/amigo/term/GO:0002237	-0.3018	-1.53669	0.00182149	0.0393836	279	./Project_wg_result1777002351_GSEA/GO_0002237.png	109	448830;24747;156767;24189;360549;24484;25464;25145;25402;140668;25022;64371;362491;367100;24267;64044;289754;25374;294337;29139;65161;361794;94201;297968;113959;81818;24230;84022;25126;497942;171569;29337;58949;25644;301227;58923;25496;60350;301059;57302;29260;63868;295338;117287;315714;54287;394266;171056;29665;64026;81743;364867;25256;25732;246097;362050;155012;84577;171164;50689;29338;316327;2…	Abcc3;Acp5;Adam17;Adamts13;Akirin2;Alad;Aldh2;Aldoa;Alpl;Arid5a;B2m;Bmp6;Bysl;C5ar1;Casp3;Casp7;Casp8;Cd14;Cd180;Cd24;Cd6;Cdk4;Cfh;Chmp5;Cnp;Cnr2;Col6a1;Comt;Cx3cr1;Cxcl16;Dcn;Ednrb;Eif2ak2;Entpd2;Epas1;Fas;Fcgr3a;Fer;Fgfr1;Fgfr2;Fmo1;Gbp2;Gbp5;Gch1;Ghsr;Gjb2;Hadhb;Hdac1;Hdac2;Hmgcs2;Hspd1;Icam1;Igf1;Igfbp3;Irak3;Irgm;Jun;Jund;Litaf;Loxl1;Ly86;Ly96;Lyn;Maob;Mapk3;Mapkapk2;Mapkapk3;Mefv;Mgst1;Myd8…
GO:0032102	negative regulation of response to external stimulus	http://amigo.geneontology.org/amigo/term/GO:0032102	-0.307683	-1.53674	0.00376648	0.0396497	228	./Project_wg_result1777002351_GSEA/GO_0032102.png	67	445269;84022;56611;24483;316842;362619;84426;25369;308901;301227;50566;58923;25496;29474;59086;25267;298487;170538;25298;25591;315599;24318;25297;192281;363142;25732;140585;246331;29338;252917;114107;25631;287362;303311;361035;25728;25528;303538;81814;29143;50594;295703;310663;24404;306790;362434;24482;171104;289237;298693;24786;25625;303090;116689;54410;81859;314870;24165;25673;29427;114087;2936…	Acp5;Ada;Adora2a;Aif1;Anxa2;Anxa5;Apoe;Banf1;C5ar2;Cacnb3;Cck;Cd9;Cldn19;Coro1b;Dhx58;Drd2;Enpp3;Fabp7;Ghsr;Gper1;Gpr17;Gpx1;Grem1;Grn;Igf1;Igf2;Irak3;Irgm;Isg15;Kremen1;Lpcat3;Mefv;Metrnl;Mettl3;Nbl1;Nlrp3;Nlrx1;Notch1;Nr1d1;Nrp1;Oas1a;Padi2;Parp1;Pdgfra;Prdx2;Prkcd;Ptpn6;Rtn4rl1;Ryk;Sema3b;Sema4d;Serpine2;Serping1;Sharpin;Sirpa;Slamf8;Smad3;Smpdl3b;Sod1;Tgfb1;Tmsb4x;Tnfaip8l2;Tnfrsf1a;Trem2;Tri…
GO:0043627	response to estrogen	http://amigo.geneontology.org/amigo/term/GO:0043627	-0.366568	-1.53857	0.00584795	0.0393035	80	./Project_wg_result1777002351_GSEA/GO_0043627.png	24	25267;81810;63868;360626;317675;25277;246097;315222;24890;316327;24451;54227;64033;140588;81707;114850;24232;25227;307505;84353;25717;81809;24264;58919	Arid5a;Arpc1b;Arsa;Arsb;C3;Ccnd1;Ccnd2;Ckb;Ctnna1;Ctnnb1;Esr1;Fas;Gli3;Hmox1;Hspd1;Krt19;Mfge8;Mmp14;Pdgfra;Tgfb2;Tgfb3;Tgfbr2;Tph2;Wnt7a
GO:0032620	interleukin-17 production	http://amigo.geneontology.org/amigo/term/GO:0032620	-0.501598	-1.54161	0.0250482	0.0387154	19	./Project_wg_result1777002351_GSEA/GO_0032620.png	8	59086;25670;301059;29260;25591;501095;316327;310553	Arid5a;Il15;Myd88;Parp1;Rftn1;Tgfb1;Tlr2;Tlr4
GO:0003205	cardiac chamber development	http://amigo.geneontology.org/amigo/term/GO:0003205	-0.34227	-1.54489	0.00968992	0.0380457	111	./Project_wg_result1777002351_GSEA/GO_0003205.png	41	79558;308376;25022;85272;367100;299858;170899;298836;171356;287612;25703;25496;59086;361751;308577;81810;81507;60628;64512;81743;25639;25654;246331;57341;25587;29497;83518;59107;81527;364712;24482;29557;689710;313689;29633;293047;299116;313564;81809;25273;360903	Acvr1;Adgrg6;Aplnr;Bmp7;Bmpr1a;Col11a1;Cxcr4;Dhrs3;Fgfr2;Fgfrl1;Fkbp1a;Foxc2;Fuz;Fzd2;Heg1;Id2;Igf1;Kcnk2;Kif7;Lrp1;Ltbp1;Mks1;Myh7;Ndst1;Notch1;Nrp1;Nrp2;Parva;Pde2a;Ptbp1;Rbp4;Rnls;Sav1;Smad6;Smo;Snx17;Sox4;Tgfb1;Tgfb2;Tgfbr2;Zmpste24
GO:0048872	homeostasis of number of cells	http://amigo.geneontology.org/amigo/term/GO:0048872	-0.314553	-1.54867	0.0020202	0.0372188	211	./Project_wg_result1777002351_GSEA/GO_0048872.png	72	294337;314637;290396;25176;360665;289707;100360077;361338;65155;294322;25126;29286;171432;317578;25496;59086;54260;83501;155151;114203;171056;25599;29665;365901;246280;140586;246240;24170;246097;171575;686075;155012;25632;29338;310392;59328;498666;29344;25587;24440;24451;312728;79210;25748;366126;294797;64158;364712;81776;362434;297995;81515;289231;298693;24786;84468;24223;296408;296973;24165;542…	Ada;Adam17;Add1;Alas1;Alas2;B2m;Bpgm;Cd74;Cdh2;Cfh;Chmp5;Chst3;Col6a1;Coro1a;Cx3cr1;Diaph3;Dnase2;Epas1;Fam210b;Fas;Fcer1g;Fech;Fstl1;Gapt;Gnat2;Hba-a1;Hbb;Hmox1;Id2;Il7r;Inpp5d;Isg15;Itpkb;Jmjd6;Lpcat3;Lyar;Lyn;Mthfd1;Ncstn;Notch1;P2rx7;Pknox1;Prdx1;Prdx2;Rassf2;Ripk3;Rps17;Rps24;Sash3;Sh2b2;Slc15a4;Slc25a5;Slc39a3;Slc7a11;Smad5;Smo;Sod1;Sox4;Sox6;Sox9;Spi1;Stat5a;Stat5b;Tgfb1;Tgfb2;Tmem14c;Tnfs…
GO:0072665	protein localization to vacuole	http://amigo.geneontology.org/amigo/term/GO:0072665	-0.393966	-1.55025	0.00608519	0.0369111	54	./Project_wg_result1777002351_GSEA/GO_0072665.png	17	56084;140729;499508;300652;140726;295357;308869;29448;117106;140725;361957;303090;287645;24854;360776;295231;89783	Cacng4;Cacng5;Cacng8;Clu;Glmp;Hgs;Irgm;Lamtor1;Lamtor4;Lamtor5;Laptm5;Mfsd1;Rab7a;Scarb2;Snf8;Sorl1;Zfyve16
GO:0198738	cell-cell signaling by wnt	http://amigo.geneontology.org/amigo/term/GO:0198738	-0.305229	-1.55327	0	0.0363552	272	./Project_wg_result1777002351_GSEA/GO_0198738.png	87	313589;362550;362325;25554;25640;116549;83502;84426;50566;25496;59086;365468;308577;83501;362587;300673;315196;360564;29393;305922;295062;291130;24318;29134;296466;306782;116477;64512;362065;140586;100363275;140585;310074;81523;289026;84577;84482;83427;689914;114107;684097;25631;311163;361726;295691;83575;498328;309172;25728;310644;171092;25236;308843;65278;317322;140588;246768;64391;364712;49823…	Adgra2;Apoe;Axin2;Bambi;Bcl9l;Cby1;Ccnd1;Cdh1;Cdh2;Col1a1;Cpz;Csnk1g2;Csnk2a1;Ctdnep1;Cthrc1;Ctnnb1;Ctnnd1;Dapk3;Dcdc2;Depdc1b;Dkk3;Draxin;Drd2;Ednrb;Foxo1;Frmd8;Frzb;Fuz;Fzd2;G3bp1;Gid8;Gli3;Gpc3;Gpc4;Grem1;Hdac1;Hdac2;Hnf1b;Ilk;Jup;Kank1;Kremen1;Lats2;Lgr6;Limd1;Lzts2;Macf1;Mdfi;Mdfic;Myoc;Ndrg2;Nkd1;Notch1;Pbxip1;Pkd2;Ptpro;Rack1;Ror1;Ror2;Rspo1;Ryk;Sdhaf2;Shisa3;Smad3;Snai2;Snx3;Sox13;Sox2;So…
GO:0070741	response to interleukin-6	http://amigo.geneontology.org/amigo/term/GO:0070741	-0.477861	-1.55746	0.0200803	0.0351398	24	./Project_wg_result1777002351_GSEA/GO_0070741.png	7	29271;24252;366126;301737;64467;89824;25293	Aqp4;Cebpa;Cfl1;Chi3l1;Entpd2;Fer;Spi1
GO:0033002	muscle cell proliferation	http://amigo.geneontology.org/amigo/term/GO:0033002	-0.322994	-1.55784	0.00193798	0.0352862	187	./Project_wg_result1777002351_GSEA/GO_0033002.png	59	25126;171569;25703;85385;303634;58949;25496;56083;59086;81663;25643;25670;301059;81810;29260;117287;81507;24338;54237;29415;685781;24890;595134;84577;84007;29302;64472;291445;66018;25587;24451;291084;25728;64033;24586;94338;29733;24482;171104;117264;24179;297523;365057;79129;25239;171396;170922;79114;24516;81664;29427;299116;117273;297893;171114;84353;25717;81809;25285	Agt;Aif1;Akirin1;Apod;Apoe;Bmpr1a;C3ar1;Ccnd2;Cdk1;Ctnnb1;Cyba;Ddr2;Ephb1;Esr1;Fgfr1;Gna12;Gna13;Gnai2;Gnai3;Gper1;Hdac1;Hdac2;Hmox1;Id2;Igf1;Igfbp5;Il15;Ilk;Itgb3;Jun;Map3k5;Megf10;Myd88;Naa35;Ncam1;Ndrg2;Notch1;Nqo2;P2ry6;Park7;Pdgfd;Ptafr;Rbp4;Rhoa;S1pr1;S1pr2;Sav1;Shc1;Smpd3;Spon2;Stat5b;Sulf1;Tgfb1;Tgfb2;Tgfb3;Tgfbr2;Tgm2;Tlr4;Vgll4
GO:0035329	hippo signaling	http://amigo.geneontology.org/amigo/term/GO:0035329	-0.483007	-1.55823	0.0334572	0.0353772	25	./Project_wg_result1777002351_GSEA/GO_0035329.png	12	305922;295062;289419;287473;303039;366352;297523;297387;299116;308912;25744;316101	Dchs1;Lats2;Limd1;Mob1a;Mob3b;Nek8;Nf2;Nuak2;Sav1;Vgll4;Wwc1;Wwtr1
GO:0071604	transforming growth factor beta production	http://amigo.geneontology.org/amigo/term/GO:0071604	-0.454572	-1.56079	0.0302457	0.0349871	29	./Project_wg_result1777002351_GSEA/GO_0071604.png	18	498545;29560;25145;293135;116777;84032;24553;81507;303875;25631;308843;59107;81682;24179;315047;361537;301252;81809	Agt;Bmpr1a;Cd24;Cdh3;Col3a1;Hif1a;Hsp90ab1;Laptm4b;Lrrc32;Ltbp1;Lum;Met;Nrros;Smad3;Tgfb2;Tsc22d1;Tsku;Tyrobp
GO:0032606	type I interferon production	http://amigo.geneontology.org/amigo/term/GO:0032606	-0.379413	-1.56283	0.00568182	0.0347565	73	./Project_wg_result1777002351_GSEA/GO_0032606.png	29	303350;293624;291171;29337;364594;317468;498272;684440;60350;301059;29260;63868;499801;311430;295338;315599;192281;364867;25155;85241;24508;25528;303538;171092;298693;361537;303090;310553;114087	Banf1;Cd14;Dhx58;G3bp1;Hspd1;Ifih1;Irf1;Irf7;Irgm;Isg15;Mavs;Myd88;Nlrx1;Oas1a;Plcg2;Pola1;Ptpn22;Rnf135;Sirpa;Syk;Ticam2;Tlr2;Tlr3;Tlr4;Tlr7;Tlr8;Trim27;Tyrobp;Uap1
GO:0007498	mesoderm development	http://amigo.geneontology.org/amigo/term/GO:0007498	-0.385568	-1.56433	0.0100604	0.03464	62	./Project_wg_result1777002351_GSEA/GO_0007498.png	25	84354;25724;79558;25022;85272;293345;171356;366031;689284;363294;298878;362587;81507;362065;25631;361096;29302;29344;116654;362617;287447;300447;79114;25744;25273	Acvr1;Ahdc1;Bmp7;Bmpr1a;Crb2;Ctdnep1;Ecsit;Exoc4;Fgfr1;Fgfr2;Foxc2;Itgb3;Itgb4;Macf1;Nf2;Osr1;Rpl38;Smad3;Smo;Ssbp3;Taf10;Twsg1;Wls;Zfp36l1;Zic2
GO:0045445	myoblast differentiation	http://amigo.geneontology.org/amigo/term/GO:0045445	-0.396319	-1.56498	0.0162933	0.0346993	59	./Project_wg_result1777002351_GSEA/GO_0045445.png	24	117537;24605;315769;56646;50566;25496;59086;300673;29317;140586;24251;83618;595134;291445;29344;302993;24404;364712;24482;25585;365057;170922;84353;29452	Akirin1;Bcl9l;Cd53;Csrp2;Ctnnb1;Epas1;Gpx1;Grem1;Id3;Igf1;Ilk;Klhl41;Lgals1;Map3k5;Megf10;Notch1;Nras;Rest;Sox4;Sox8;Sox9;Tgfb1;Trip4;Zfp36l1
GO:1990000	amyloid fibril formation	http://amigo.geneontology.org/amigo/term/GO:1990000	-0.496587	-1.56845	0.0273973	0.0339646	22	./Project_wg_result1777002351_GSEA/GO_1990000.png	8	301227;246240;25639;25420;25728;24223;24854;24874	Apoe;B2m;Clu;Cryab;Fkbp1a;Ripk3;Trem2;Vhl
GO:0006022	aminoglycan metabolic process	http://amigo.geneontology.org/amigo/term/GO:0006022	-0.395572	-1.57285	0.0102669	0.0331287	66	./Project_wg_result1777002351_GSEA/GO_0006022.png	21	59086;25670;303218;25193;315939;314694;303923;302302;308797;94338;316533;367166;84468;308440;300757;29633;25227;89824;294673;307859;50672	Arsb;B3gnt8;B4galt4;Ccnd3;Cemip;Chi3l1;Chpf;Chst11;Chst3;Chst5;Chst7;Ednrb;Hexa;Hexb;Hs3st3b1;Hyal1;Il15;Ndst1;Pxylp1;Smpd3;Tgfb1
GO:0071559	response to transforming growth factor beta	http://amigo.geneontology.org/amigo/term/GO:0071559	-0.328428	-1.57653	0.00384615	0.0322902	167	./Project_wg_result1777002351_GSEA/GO_0071559.png	64	79558;25022;25687;367100;84471;293135;292734;299858;116777;79128;81732;25164;84032;84426;363294;59086;25150;81810;293783;300673;25617;29393;305922;59106;25591;81507;171056;361954;499443;83823;246060;81743;140586;25639;314694;685781;432392;303875;84577;83727;59328;25631;66018;29344;366126;59107;680717;286927;315761;360959;29175;301252;114850;24516;83837;29468;293165;316137;57027;25717;79216;81809;…	Actr3;Acvr1;Adam17;Adgre1;Amhr2;Bambi;Bcl9l;Bmpr1a;Cald1;Cdh3;Cdkn1c;Cdkn2b;Chst11;Cilp;Col1a1;Col3a1;Ctsk;Cx3cr1;Dab2;Ddr2;Fbn1;Fgfr2;Fkbp1a;Fut8;Fyn;Gdf10;Gipc1;Hdac2;Hsp90ab1;Hspa5;Htra3;Il17rd;Jun;Lats2;Lims1;Lpxn;Lrp1;Lrrc32;Ltbp1;Ltbp2;Ltbp4;Nrros;Parp1;Pde2a;Pdgfd;Pdia3;Smad3;Smad5;Smad6;Snx1;Sox6;Sox9;Spi1;Stk16;Tgfb1;Tgfb2;Tgfb3;Tgfbr2;Twsg1;Veph1;Wnt4;Wnt7a;Zfp36l1;Zfp703
GO:0032970	regulation of actin filament-based process	http://amigo.geneontology.org/amigo/term/GO:0032970	-0.313711	-1.57733	0	0.0323029	252	./Project_wg_result1777002351_GSEA/GO_0032970.png	90	361921;24771;81732;282843;58971;297339;315655;100361376;313838;291171;100360501;29480;24553;315121;84426;81917;29474;59086;306941;308765;113940;155151;170538;293024;360854;369016;25230;81778;29271;360950;81757;24170;246331;301709;81523;29209;84577;287419;499702;364206;298584;25631;29302;683788;361617;54319;361422;291926;287876;362918;64465;316369;117183;313024;378947;81814;300030;287375;301737;64…	Actg1;Actr3;Add1;Add3;Akap13;Alox15;Arap1;Arf6;Arfip1;Arhgap28;Arhgef19;Arpc5;Arpin;Atp1a1;Atp1a2;Bst2;Capg;Capzb;Carmil1;Casq2;Cdc42;Cdc42ep1;Cdc42ep3;Cdc42ep4;Cfl1;Coro1a;Coro1b;Coro2b;Cotl1;Cyfip1;Dapk3;Dstn;Ect2;Ezr;Fer;Flii;Fscn1;Fxyd1;Gmfg;Hdac2;Hip1r;Ilk;Itgb3;Jup;Kank1;Kank2;Kank4;Met;Mtss1;Myadm;Mylk3;Myo1f;Myoc;Nck2;Nf2;Nrp1;Pard3;Pdlim4;Pdpn;Pfn1;Plek;Prex1;Prkcd;Rala;Rangrf;Rdx;Rgcc;R…
GO:1901342	regulation of vasculature development	http://amigo.geneontology.org/amigo/term/GO:1901342	-0.322414	-1.57938	0	0.0319266	192	./Project_wg_result1777002351_GSEA/GO_1901342.png	80	29591;83619;64680;114111;24747;81517;305081;25589;85421;29158;170897;289754;117277;362931;29618;89806;29139;266759;361568;113959;171356;24605;84022;24483;100360501;25426;364594;84426;114099;100363145;50566;59086;81810;311210;25059;171056;56084;64157;116477;60628;100363275;24170;246331;309684;308061;84007;292401;292756;29302;679837;360498;24451;362326;25338;117183;29143;83518;299145;24179;298947;2…	Adam12;Add1;Adgra2;Adgrb1;Agt;Anxa3;Aplnr;Btg1;C3;C3ar1;C5ar1;Cd34;Chi3l1;Creb3l1;Crhr2;Ctnnb1;Ctsh;Cx3cr1;Cxcr4;Cyp1b1;Cysltr1;Dcn;Ddah1;Emc10;Emp2;Epn1;Fbln5;Foxc2;Ghsr;Grem1;Grn;Hgs;Hk2;Hmox1;Hspa4;Hspb6;Hyal1;Igf2;Itgb2;Itgb3;Jmjd8;Jup;Kdr;Mdk;Nfe2l2;Ngfr;Ninj1;Nras;Nrp1;Pak4;Pdcd6;Pik3cg;Prkd1;Ptn;RT1-M3-1;Rgcc;Rhoj;Rnh1;Rras;S100a1;Sash1;Smoc2;Sphk1;Stab1;Sulf1;Tgfb1;Tgfb2;Tgfbr1;Tgfbr2;Thb…
GO:0032963	collagen metabolic process	http://amigo.geneontology.org/amigo/term/GO:0032963	-0.390843	-1.58025	0.0077821	0.0319676	67	./Project_wg_result1777002351_GSEA/GO_0032963.png	24	84426;25496;59086;170538;29393;29665;685781;494125;117183;81707;59107;94338;304608;498011;295347;292808;25307;29345;29175;362165;288583;25697;25717;291848	Col1a1;Creb3l1;Cst3;Ctsk;Ctsl;Ddr2;Ltbp1;Mmp14;Mmp15;Mmp19;Mrc2;Notch1;P2rx7;Pepd;Plod3;Prkcd;Rap1a;Rcn3;Rgcc;Serpinh1;Smpd3;Tgfb1;Tgfb3;Wnt4
GO:0048863	stem cell differentiation	http://amigo.geneontology.org/amigo/term/GO:0048863	-0.337712	-1.58031	0	0.0321758	154	./Project_wg_result1777002351_GSEA/GO_0048863.png	42	25554;25640;690139;50566;25496;298878;83501;25267;81810;315196;81507;683626;54287;64896;363142;29271;140586;246331;83618;24890;50689;308061;361096;295691;300260;64465;302993;81527;306790;499593;497988;114850;79114;85489;116676;293165;84353;81809;24924;366270;25273;50672	Aldh1a2;Bmpr1a;Cdc42;Cdh2;Cfl1;Ctnnb1;Edn3;Ednrb;Eif2ak2;Esr1;Fgfr1;Frzb;Grem1;Hnf1b;Hoxb4;Lbh;Mapk3;Nolc1;Notch1;Nrp1;Nrp2;Osr1;Pdcd6;Pdgfra;Ptn;Rbm24;Rest;Sema3b;Sema4d;Smo;Snai2;Sox2;Sox6;Sox8;Sox9;Sp7;Tgfb2;Tgfbr2;Twist1;Wnt7a;Wnt7b;Zic2
GO:0043473	pigmentation	http://amigo.geneontology.org/amigo/term/GO:0043473	-0.390114	-1.58175	0.00808081	0.0320517	66	./Project_wg_result1777002351_GSEA/GO_0043473.png	21	24941;25554;364183;690366;680476;24318;365901;83427;81754;361096;288227;308598;25728;140588;29186;83526;309855;362818;24874;366270;50672	Apoe;Atp7a;Atrn;Bace2;Bloc1s3;Bloc1s4;Cd63;Drd2;Edn3;Ednrb;Fig4;Gli3;Gnat2;Hps5;Pmel;Rab1a;Rack1;Snai2;Vangl1;Vhl;Zic2
GO:0120254	olefinic compound metabolic process	http://amigo.geneontology.org/amigo/term/GO:0120254	-0.385021	-1.58307	0.00992064	0.0319362	70	./Project_wg_result1777002351_GSEA/GO_0120254.png	32	266684;246298;25315;170897;353252;79128;25126;25703;191574;24424;25426;25644;84426;65030;171522;25117;25322;83618;50689;25056;24188;24404;25702;266686;171548;116676;29254;362757;84575;81639;313375;50672	Akr1c14;Aldh1a1;Aldh1a2;Alox15;Bmp6;Cyp1b1;Cyp2d1;Cyp2d4;Cyp2j3;Dab2;Dhrs4;Dkk3;Ednrb;Ephx1;Ephx2;Fads1;Gpx1;Gstm2;Hsd11b2;Hsd17b1;Mapk3;Mgll;Pnlip;Rbp1;Rbp4;Rdh10;Rdh11;Rest;Retsat;Sphk1;Stat5b;Wnt4
GO:0006766	vitamin metabolic process	http://amigo.geneontology.org/amigo/term/GO:0006766	-0.406415	-1.58425	0.0148699	0.0319573	55	./Project_wg_result1777002351_GSEA/GO_0006766.png	19	309004;64392;24312;25571;313706;25056;304078;312495;680668;306262;24314;289175;83839;81716;79114;306198;296371;313520;25586	Aldh1l1;Alpl;Btd;Calb1;Cbr3;Clybl;Cyp26b1;Dhfr;Fgfr1;Ggcx;Mmachc;Nqo1;Pltp;Rbp1;Slc19a2;Tpk1;Ttpa;Ubiad1;Vkorc1
GO:0002521	leukocyte differentiation	http://amigo.geneontology.org/amigo/term/GO:0002521	-0.301955	-1.58791	0	0.0312486	350	./Project_wg_result1777002351_GSEA/GO_0002521.png	126	24705;364754;84586;245983;54231;25232;100360982;24747;246774;84477;25145;24780;81517;287871;64639;362491;171355;64044;289754;65138;290396;25176;304947;25360;289757;360665;361431;498951;25033;361568;305471;24699;294322;25126;116557;25109;56611;686326;29337;24941;500590;287380;690369;317578;84426;56646;301227;59086;54260;25670;301059;81810;29260;65041;287818;155151;295338;294269;25599;306782;60628;…	Acp5;Ada;Adam17;Adrm1;Anxa2;Atp7a;B2m;Bad;Car2;Casp8;Cbfa2t3;Cd1d1;Cd24;Cd300lf;Cd4;Cd74;Cebpa;Clpb;Clptm1;Coro1a;Ctnnb1;Ctsk;Ctsl;Cxcr4;Cyp26b1;Dhrs7b;Diaph3;Fam20c;Fas;Fasn;Fbn1;Fcer1g;Fgl2;Foxj1;Fzd8;Gab2;Gimap5;Gli3;Gpc3;Id2;Ifnar2;Il11ra1;Il15;Il15ra;Il34;Il7r;Inpp5d;Irf1;Itpkb;Jagn1;Jmjd6;Jun;Kdelr1;Klhl25;Laptm5;Lgals1;Loxl3;Lrrc17;Lyn;Mdk;Mettl3;Mmp14;Mpzl2;Myd88;Nfam1;Ninj1;Nlrp3;Nme2;Nr…
GO:0042110	T cell activation	http://amigo.geneontology.org/amigo/term/GO:0042110	-0.312328	-1.59173	0	0.0304742	292	./Project_wg_result1777002351_GSEA/GO_0042110.png	112	24705;364754;84586;50645;100360982;24747;156767;246774;25464;25145;25402;302811;291983;24780;171122;81517;64639;362491;289754;65138;293135;360665;25033;24771;116457;100360077;305471;24699;294322;25662;680006;25126;116557;25109;686326;24483;24941;500590;317578;686310;84426;56646;363294;25369;59086;25150;54260;25670;81810;81521;155151;63868;295338;294269;25368;25599;29665;25193;60628;360546;246240;…	Ada;Adam17;Adk;Adora2a;Adrm1;Aif1;Atp7a;B2m;Bad;Casp3;Ccnd3;Cd1d1;Cd24;Cd37;Cd4;Cd48;Cd6;Cd74;Clptm1;Coro1a;Ctnnb1;Ctsl;Cxcr4;Cyp26b1;Ddost;Efnb3;Elf4;Ephb4;Fas;Fcer1g;Fgl2;Fkbp1a;Foxj1;Fyn;Fzd8;Gimap5;Gli3;Hspd1;Icam1;Ifnar2;Igf1;Igf2;Igfbp2;Il15;Il7r;Irf1;Irgm;Itgal;Itgb2;Itpkb;Jmjd6;Kdelr1;Klhl25;Laptm5;Lgals1;Loxl3;Lrrc32;Mad1l1;Mapk8ip1;Mdk;Mettl3;Mpzl2;Msn;Nck2;Ncstn;Nlrp3;P2rx7;Patz1;Pknox…
GO:0006720	isoprenoid metabolic process	http://amigo.geneontology.org/amigo/term/GO:0006720	-0.381749	-1.59215	0.00978474	0.0306148	68	./Project_wg_result1777002351_GSEA/GO_0006720.png	29	25675;192259;29563;246298;310645;353252;81727;29580;29640;25703;25426;83791;171522;89784;81726;29637;25056;312495;362031;24188;113956;25702;266686;24450;313689;116676;114861;362757;114209	Aldh1a1;Aldh1a2;Alg14;Crabp2;Cyp1b1;Cyp26b1;Cyp2d4;Dhrs3;Dhrs4;Dpm2;Fdft1;Fdps;Hmgcr;Hmgcs1;Hmgcs2;Idi1;Mvd;Mvk;Pecr;Phyh;Plb1;Pmvk;Pnlip;Rbp1;Rbp4;Rdh10;Rdh11;Retsat;Scpep1
GO:0090596	sensory organ morphogenesis	http://amigo.geneontology.org/amigo/term/GO:0090596	-0.333109	-1.5979	0	0.0296904	174	./Project_wg_result1777002351_GSEA/GO_0090596.png	59	312574;29589;311130;309626;25054;25703;366031;689284;686117;25496;360652;298878;308577;24338;306782;365901;64512;365748;140586;501061;25654;85425;266813;155012;83618;84577;50689;309860;83727;312495;295691;24188;362326;302993;362237;24706;315840;309201;308843;364674;366140;140588;499593;24786;305552;83839;282836;314988;79114;29454;85489;83720;297893;50938;300653;84353;310838;24874;24924	Aldh1a1;Bcar3;Bhlhe22;Calb1;Cdon;Cfh;Col11a1;Crb2;Cthrc1;Ctnnb1;Cyp26b1;Ephb1;Fat1;Fbn1;Fgfr1;Fjx1;Frzb;Fuz;Fzd2;Gdf11;Gli3;Gnat2;Hdac1;Hdac2;Lrig1;Mapk3;Meis1;Myo6;Notch1;Ntrk2;Osr1;Pou3f4;Prkra;Prrx1;Ptn;Rarb;Rbp4;Rest;Ring1;Rom1;Ror2;Rpl38;Sdk2;Sobp;Sod1;Sox2;Sox8;Sox9;Tbc1d20;Tdrd7;Tecta;Tifab;Tmie;Tsku;Tspan12;Twist1;Vhl;Wdpcp;Zhx2
GO:0006091	generation of precursor metabolites and energy	http://amigo.geneontology.org/amigo/term/GO:0006091	-0.316137	-1.60478	0	0.0285285	271	./Project_wg_result1777002351_GSEA/GO_0006091.png	101	80773;362383;24644;25747;362897;498289;362706;60571;364682;690344;29507;79238;311403;24189;79250;24267;499189;294337;58977;293655;287069;361431;308390;24533;290370;309513;361385;293098;25309;24479;64539;24483;24941;690987;299201;295923;65152;79111;84484;293130;24668;117287;64392;25059;297389;29665;654441;81743;65142;54237;499991;363061;316976;100360180;305234;252917;361726;360498;291084;83842;362…	Abcd1;Acadm;Aco1;Aco2;Acox1;Agl;Ak2;Ak4;Akt2;Aldh1l1;Aldoa;Arl2;Atp7a;Bpgm;Cat;Cbfa2t3;Cdk1;Col6a1;Comt;Coq9;Cox6b2;Cox7a2;Cox8a;Crot;Cxxc5;Cyb5a;Cyb5b;Cyba;Cycs;Dguok;Dlst;Dnajc15;Eno1;Etfa;Etfbkmt;Fdx1;Fkrp;Gadd45gip1;Gfpt1;Gyg1;Gys1;Hk2;Hmgcl;Hmgcs2;Ide;Idh1;Idh2;Igf1;Igf2;Jmjd8;Ldha;Mt3;Mtfr1;Mybbp1a;Ndufa10l1;Ndufb7;Ndufc2;Ndufs3;Ndufv1;Ndufv3;Nhlrc1;Nnt;Nqo2;Nr1d1;Ogdh;Opn3;Oxct1;P2rx7;Park…
GO:0043094	cellular metabolic compound salvage	http://amigo.geneontology.org/amigo/term/GO:0043094	-0.538968	-1.60492	0.0229008	0.0287347	18	./Project_wg_result1777002351_GSEA/GO_0043094.png	10	362015;171047;298934;25368;297389;305177;315085;24165;292072;290741	Ada;Adi1;Adk;Ampd2;Aprt;Dctd;Dguok;Dnph1;Enoph1;Naprt
GO:0003170	heart valve development	http://amigo.geneontology.org/amigo/term/GO:0003170	-0.430718	-1.60551	0.0143149	0.0288541	41	./Project_wg_result1777002351_GSEA/GO_0003170.png	20	25546;156767;79558;367100;89806;25496;59086;81810;81507;29134;81743;140586;83518;364712;25625;117273;85489;308912;81809;360903	Acvr1;Aplnr;Axin2;Bmpr1a;Dchs1;Fgfrl1;Notch1;Pde2a;Rhoa;Shox2;Smad6;Sox4;Sox9;Tgfb1;Tgfb2;Tgfbr2;Tie1;Tnfrsf1a;Tnfrsf1b;Twist1
GO:0072001	renal system development	http://amigo.geneontology.org/amigo/term/GO:0072001	-0.319334	-1.60786	0	0.0286113	258	./Project_wg_result1777002351_GSEA/GO_0072001.png	88	63836;304947;353252;360665;29139;311508;298836;24771;24468;266759;171356;362015;100361376;116557;25492;25703;25640;25644;84426;50566;25496;59086;365468;298878;84484;25267;315196;81641;94342;83508;295062;303218;25473;501563;246060;60628;140586;246331;432360;155012;84007;83727;59328;25631;29302;312495;311163;498328;66018;25587;24188;362918;65197;302993;24706;25236;300030;24311;25484;140588;364712;2…	Actn4;Agt;Aldh1a1;Aldh1a2;Aldh9a1;Ampd2;Anpep;Bag6;Bmp6;C3ar1;Calb1;Cat;Cdkn1c;Cfh;Ctnnb1;Ctnnd1;Ctsh;Cxcr4;Cyp26b1;Dchs1;Dcn;Ddc;Ednrb;Fbn1;Fgfr1;Foxc2;Foxj1;Gdf11;Gli3;Gpc3;Grem1;Gzf1;Hmgcs2;Hnf1b;Hs3st3b1;Hspa4;Hspa8;Id2;Id3;Ift27;Ilk;Itgb3;Jmjd6;Kank2;Lamb2;Lzts2;Mpst;Mtss1;Myo1e;Nfia;Notch1;Nrp1;Odc1;Osr1;Pbx1;Pdgfd;Pdgfra;Pkd2;Prkx;Ptpro;Rarb;Rbp4;Rdh10;Rhoa;Rhpn1;Sdc4;Sec61a1;Sgce;Slc2a5;S…
GO:0002250	adaptive immune response	http://amigo.geneontology.org/amigo/term/GO:0002250	-0.331758	-1.61003	0	0.0282381	196	./Project_wg_result1777002351_GSEA/GO_0002250.png	79	100360982;24747;156767;246774;25464;192262;25145;362491;83527;295279;303281;313702;24468;311786;297968;24699;294228;116557;293624;25109;291171;25423;317578;301227;25496;59086;500251;301059;29260;63868;170538;298566;294269;300985;171056;289785;25599;29665;304496;29687;246280;304577;246240;25155;246097;155012;501095;84492;316327;84007;287362;54243;498666;408246;65190;312478;294797;295703;304966;249…	Ada;Adam17;Adgre1;Akirin2;Alox15;Arid5a;B2m;C1qa;C1qb;C1rl;C1s;C3;C3ar1;Cd1d1;Cd24;Cd4;Cd74;Cfh;Cr1l;Csf3r;Ctnnbl1;Ctsc;Ctsh;Ctsl;Cx3cr1;Dbnl;Emp2;Fas;Fcer1g;Fcgr1a;Fcgr3a;Foxj1;Gimap5;Hmces;Hspa8;Hspd1;Icam1;Il17ra;Il7r;Inpp5d;Irf7;Lat2;Loxl3;Lyn;Mad2l2;Myd88;Myo1g;Nectin2;Nlrp3;Notch1;Orai1;P2rx7;Parp3;Pdia3;Prkcd;Ptpn6;Ptprc;RT1-Da;RT1-M3-1;RT1-S3;Relb;Rftn1;Ripk2;Ripk3;Rsad2;Sash3;Serping1;Sl…
GO:0031348	negative regulation of defense response	http://amigo.geneontology.org/amigo/term/GO:0031348	-0.343336	-1.61017	0	0.0284721	140	./Project_wg_result1777002351_GSEA/GO_0031348.png	57	361241;25747;360557;84586;25232;24747;156767;25145;302811;81517;311580;312688;81727;289707;84022;24483;316842;362619;25369;308901;301227;58923;59086;25298;25591;315599;24318;192281;25732;252917;25631;287362;361035;25728;25528;303538;81814;29143;295703;310663;24404;362434;24482;171104;289237;298693;24786;25625;303090;116689;54410;81859;314870;24165;114087;767613;171112	Acp5;Ada;Adora2a;Apoe;Banf1;Cck;Cd24;Dhx58;Drd2;Elf4;Enpp3;Fgl2;Ghsr;Gper1;Gpr17;Gpx1;Grn;Igf1;Igf2;Irak3;Irgm;Isg15;Lpcat3;Lyar;Mdk;Mefv;Metrnl;Mettl3;Mvk;Nlrp1a;Nlrp3;Nlrx1;Nr1d1;Oas1a;Parp1;Ppara;Ptpn6;RT1-M3-1;Samhd1;Serpinb9;Serping1;Sharpin;Sirpa;Slamf8;Smad3;Smpdl3b;Sod1;Tgfb1;Tmsb4x;Tnfaip8l2;Tnfrsf1a;Tnfrsf1b;Trem2;Trim21;Tyro3;Usp18;Wfdc1
GO:0002831	regulation of response to biotic stimulus	http://amigo.geneontology.org/amigo/term/GO:0002831	-0.317022	-1.61108	0	0.0284766	268	./Project_wg_result1777002351_GSEA/GO_0002831.png	110	448830;25232;24747;246774;25145;305340;85421;362491;64044;362156;303687;311580;312688;366014;361794;289707;24468;361730;246239;297968;304545;25126;303350;78968;293624;29337;24483;362619;364594;25644;308901;317259;301227;58923;59086;287719;317468;25670;684440;298784;60350;301059;29260;65041;287818;63868;499801;311430;295338;25591;315599;24318;54287;192281;246280;296384;29185;364867;171121;25155;30…	Akirin2;Apoe;Banf1;Bmp6;Brcc3;Casp8;Cd14;Cd180;Cd24;Cd300lf;Cd37;Cfh;Clpb;Colec12;Cyba;Dhx58;Drd2;Ecsit;Eif2ak2;Esr1;Evpl;Gbp2;Gbp5;Gimap5;Gpr108;Grn;Hexim1;Hspa8;Hspd1;Ifi35;Ifih1;Igf2;Il15;Ipo5;Irak3;Irf1;Irf7;Irgm;Isg15;Lamp1;Ly86;Ly96;Lyar;Lyn;Mapk3;Mapkapk2;Mapkapk3;Mavs;Mefv;Mettl3;Myd88;Myo1f;Nectin2;Nfkbil1;Ninj1;Nlrc4;Nlrp3;Nlrx1;Nono;Nr1d1;Oas1a;Oasl;Parp1;Plcg2;Ppp6c;Prdx2;Prkd1;Ptpn22…
GO:0031349	positive regulation of defense response	http://amigo.geneontology.org/amigo/term/GO:0031349	-0.320051	-1.61768	0	0.0271731	261	./Project_wg_result1777002351_GSEA/GO_0031349.png	92	361794;24468;361730;246239;297968;116996;304545;25126;303350;78968;293624;29337;362619;364594;25423;29473;56646;317259;301227;58923;59086;287719;317468;684440;298784;60350;301059;29260;65041;287818;63868;499801;311430;295338;25298;25591;117287;315599;54287;192281;246280;81743;296384;24252;364867;171121;25155;306182;362050;24890;364405;501095;171164;25328;50689;170900;252917;24508;287362;360571;36…	Akirin2;Aoc3;Banf1;Brcc3;C3;Cck;Cd14;Cd300lf;Cebpa;Clpb;Colec12;Ctsc;Cyba;Dhx58;Ecsit;Eif2ak2;Esr1;Fcer1g;Gbp2;Gbp5;Gpr108;Grn;Hexim1;Hspa8;Hspd1;Ifi35;Ifih1;Il16;Il17ra;Ipo5;Irak3;Irf1;Irf7;Irgm;Lamp1;Lgals1;Lpl;Lyn;Mapk3;Mapkapk2;Mapkapk3;Mavs;Mefv;Myd88;Nectin2;Nfkbil1;Ninj1;Nlrc4;Nlrp3;Nlrx1;Nono;Nr1d1;Oas1a;Oasl;Park7;Parp1;Pde2a;Pik3cg;Plcg2;Ppp6c;Ptpn22;Rab34;Rab7b;Rbm14;Rftn1;Rnf135;Rsad2…
GO:0038061	non-canonical NF-kappaB signal transduction	http://amigo.geneontology.org/amigo/term/GO:0038061	-0.384931	-1.62525	0.00201613	0.0258226	75	./Project_wg_result1777002351_GSEA/GO_0038061.png	26	364594;361624;301227;50566;360640;287719;317468;29260;293130;498769;295338;54287;246240;287362;54319;366126;94338;289036;60383;310553;365037;311437;64202;89824;117254;89783	Adipor1;Akip1;Calr;Chi3l1;Edaradd;Eif2ak2;Ezr;Grem1;Ifi35;Laptm5;Map3k14;Ndufc2;Nlrp3;Prdx1;Ptpn22;Rassf2;Rbck1;Ripk3;Sash1;Smpd3;Spi1;Tlr2;Tlr3;Tlr4;Tlr7;Trem2
GO:0097696	receptor signaling pathway via STAT	http://amigo.geneontology.org/amigo/term/GO:0097696	-0.387798	-1.63004	0	0.0249157	78	./Project_wg_result1777002351_GSEA/GO_0097696.png	29	362856;84607;24699;25126;686326;25426;690369;25496;59086;25150;25670;498910;56084;29201;84577;313387;24508;498328;56766;294797;25235;24482;289036;81515;25625;297893;24918;25744;24874	Adipor1;Arl2bp;Ctf1;Cyp1b1;Fyn;Ghr;Hdac1;Hdac2;Hgs;Ifnar2;Igf1;Il15;Il15ra;Il7r;Irf1;Leprot;Lyn;Nf2;Notch1;Pkd2;Ptprc;Pwp1;Socs2;Stat5a;Stat5b;Tgfb1;Tnfrsf1a;Usp1;Vhl
GO:0048514	blood vessel morphogenesis	http://amigo.geneontology.org/amigo/term/GO:0048514	-0.308846	-1.63185	0	0.0247306	395	./Project_wg_result1777002351_GSEA/GO_0048514.png	142	79558;81517;305081;25589;85421;25022;29158;25687;311551;497979;81686;64044;170897;289754;117277;362931;299858;29618;81008;360665;89806;29139;266759;361568;113959;171356;294322;24605;84022;25054;85385;84032;56611;24483;100360501;25426;303634;364594;686310;686117;84426;114099;100363145;50566;25496;59086;25670;83501;25267;81810;315196;362871;81641;288057;81507;24338;311210;25059;171056;56084;84348;6…	Ackr3;Actg1;Acvr1;Adam12;Add1;Adgra2;Adgrb1;Agt;Anpep;Anxa2;Anxa3;Aplnr;Apoe;Bmpr1a;Btg1;C3;C3ar1;C5ar1;Cald1;Casp8;Cd34;Cdc42;Cdh2;Cfh;Chi3l1;Cib1;Clec14a;Clic4;Col3a1;Creb3l1;Ctnnb1;Ctsh;Cx3cr1;Cxcr4;Cyp1b1;Cysltr1;Dag1;Dcn;Ddah1;Elk3;Emc10;Emp2;Epas1;Ephb1;Ephb4;Epn1;Esm1;Fbln5;Fgfr1;Fgfr2;Foxc2;Ghsr;Gna13;Gpx1;Grem1;Grn;Hdac9;Heg1;Hgs;Hk2;Hmox1;Hspa4;Hspb6;Hyal1;Igf2;Il15;Itga7;Itgb2;Itgb3;Jm…
GO:0001667	ameboidal-type cell migration	http://amigo.geneontology.org/amigo/term/GO:0001667	-0.318751	-1.63342	0	0.0246521	305	./Project_wg_result1777002351_GSEA/GO_0001667.png	98	81732;361568;305471;171356;100361376;63865;366031;29337;24483;25426;24553;303634;25554;686310;50566;25496;29474;59086;81663;83501;362587;81810;293783;155151;83823;363142;501563;60628;29271;116510;140586;100363275;246331;685781;309684;432392;308061;292401;29302;500200;24451;64465;314148;25728;302993;79210;117183;81756;313024;81814;29143;113984;25236;29186;299145;24660;301737;81527;24404;306790;294…	Actr3;Adam17;Adgra2;Adipor1;Agt;Anxa3;Apoe;Arf6;Arsb;Atoh8;Bcar1;Calr;Cap1;Cd63;Cdc42;Cdh2;Cfl1;Cib1;Clec14a;Coro1a;Coro1b;Crb2;Ctsh;Cxcr4;Cyp1b1;Ddr2;Edn3;Ednrb;Emc10;Emp2;Ephb4;Fer;Fgfr1;Fndc3b;Foxc2;Fstl1;Fut8;Gipc1;Gna12;Gna13;Gpc3;Gpx1;Grem1;Grn;Hdac9;Hmox1;Hyal1;Igf1;Igf2;Ilk;Itgb2;Itgb3;Jun;Jup;Kank1;Kank2;Lgmn;Lpxn;Macf1;Met;Notch1;Nr2f2;Nrp1;Nrp2;Patz1;Pdcd6;Pfn1;Pik3cg;Plcg2;Pmp22;Prkx;…
GO:0035966	response to topologically incorrect protein	http://amigo.geneontology.org/amigo/term/GO:0035966	-0.384744	-1.63381	0.00192678	0.024794	84	./Project_wg_result1777002351_GSEA/GO_0035966.png	33	289754;304766;156117;293524;297968;100909598;298066;362912;362339;24697;94342;25617;63868;54287;680423;59303;297725;312903;680945;316369;316557;65165;362891;24660;296162;24854;301252;362165;407784;80881;286906;58919;24822	Akirin2;Aup1;Bag3;Bag6;Casp12;Ccnd1;Clu;Creb3l1;Creb3l2;Ddrgk1;Derl1;Eif2ak2;Erp44;Hsp90ab1;Hspa5;Hspd1;Nck2;Os9;Pdia6;Pigbos1;Pmp22;Ptpn1;Rhbdd1;Rnf5;Sdf2l1;Serp1;Tm7sf3;Tmbim6;Tmed2;Tmem33;Tram1;Ubxn4;Xbp1
GO:0009308	amine metabolic process	http://amigo.geneontology.org/amigo/term/GO:0009308	-0.389222	-1.63411	0.00567108	0.0249511	78	./Project_wg_result1777002351_GSEA/GO_0009308.png	27	688283;24941;29473;361751;29542;117287;24318;81640;171522;294119;365901;60418;24808;310392;24311;29244;25502;114123;25361;24609;29539;81632;81809;24874;25750;29452;114027	Abat;Afmid;Aldh2;Amd1;Aoc3;Atp7a;Cyp2d4;Dao;Ddc;Drd2;Epas1;Gch1;Gde1;Gnat2;Maob;Moxd1;Oaz1;Odc1;Park7;Pebp1;Rnls;Sardh;Slc7a11;Tacr3;Tgfb2;Vcam1;Vhl
GO:0040017	positive regulation of locomotion	http://amigo.geneontology.org/amigo/term/GO:0040017	-0.310375	-1.63464	0	0.025086	395	./Project_wg_result1777002351_GSEA/GO_0040017.png	128	79128;81732;361568;113959;116996;24699;171356;315655;25126;497942;63865;29337;24483;25426;24941;24553;25554;29473;58949;25613;301227;25496;59086;306941;691842;25267;81810;29260;25097;155151;25617;288057;29393;171056;25599;84348;363142;306782;25083;369016;116477;60628;29271;140586;100363275;58960;25732;246331;685781;445415;81523;24808;595134;50689;308061;83427;84007;499702;292401;307642;308797;256…	Ackr3;Acp5;Actg1;Actr3;Adam17;Adgra2;Adra2a;Agt;Aif1;Akirin1;Akt2;Anxa3;Aoc3;Arf6;Arhgap8;Atoh8;Atp7a;Bcar1;C3ar1;C5ar1;Calr;Carmil1;Casr;Cd74;Cdc42;Cemip;Cfap20;Cfl1;Cib1;Col1a1;Coro1a;Ctsh;Cx3cr1;Cxcl16;Cxcr4;Cyp1b1;Dab2;Dapk3;Ddr2;Ddrgk1;Edn3;Emc10;Fat1;Fer;Fgfr1;Foxc2;Gnai2;Gper1;Grn;Hdac9;Hmox1;Hspa5;Hyal1;Igf1;Igf2;Igfbp5;Il16;Ilk;Itgb3;Jam2;Jun;Lgmn;Lgr6;Lyn;Map2k2;Mapk3;Maz;Met;Mmp14;Myad…
GO:0031529	ruffle organization	http://amigo.geneontology.org/amigo/term/GO:0031529	-0.460054	-1.63539	0.00753296	0.0251347	34	./Project_wg_result1777002351_GSEA/GO_0031529.png	15	81651;25464;308875;315655;29474;306941;364206;308666;310460;309429;305552;79121;29427;64303;65038	Aif1;Arf6;Arhgef26;Carmil1;Coro1b;Cspg4;Cyfip1;Icam1;Inppl1;Kank1;Pfn1;Plek;Rdx;Rhog;Wdpcp
GO:0002009	morphogenesis of an epithelium	http://amigo.geneontology.org/amigo/term/GO:0002009	-0.313875	-1.63725	0	0.024877	334	./Project_wg_result1777002351_GSEA/GO_0002009.png	95	24941;24553;303634;25554;292770;25640;299737;83502;84426;296136;50566;303828;25496;56083;59086;365468;298878;117036;308577;25267;81810;315196;81521;83508;24668;303519;303218;501563;116698;60628;29271;360950;315217;64512;140586;116640;81757;246331;24890;25631;361096;311163;295691;54319;498328;24188;287876;362918;64465;302993;65165;25236;25333;140588;81707;294809;83518;24482;499593;305679;24179;819…	Actb;Actg1;Adam17;Adamts12;Agt;Aldh1a1;Aldh1a2;Aplnr;Atp7a;Casr;Cdc42;Cdh1;Cfl1;Clic4;Cthrc1;Ctnnb1;Ctnnd1;Ctsh;Ctsl;Ctsz;Cxcr4;Cyp7b1;Dag1;Dchs1;Esr1;Etv5;Ezr;Fat1;Fgfr1;Frzb;Fuz;Fzd2;Gli3;Gna13;Gpc3;Grem1;Hnf1b;Hoxb4;Hs3st3b1;Igf1;Igfbp5;Ilk;Krt25;Lamc1;Lzts2;Met;Mgp;Mmp14;Msn;Mthfd1;Mtss1;Ngfr;Nkd1;Notch1;Nphp1;Nrp1;Ntn4;Osr1;Pard3;Pdgfra;Pdpn;Pfn1;Pkd2;Plod3;Plxnb2;Ppp1ca;Prkx;Rala;Rhoa;Shroo…
GO:0098743	cell aggregation	http://amigo.geneontology.org/amigo/term/GO:0098743	-0.550159	-1.63899	0.0171756	0.0248083	17	./Project_wg_result1777002351_GSEA/GO_0098743.png	11	58968;29375;298894;306782;140586;25654;310914;171396;114850;293165;81809	Acan;Bmpr1b;Col11a1;Mycn;Ror2;Sox6;Sox9;Sulf1;Tgfb2;Uncx;Wnt7a
GO:0006040	amino sugar metabolic process	http://amigo.geneontology.org/amigo/term/GO:0006040	-0.494264	-1.64038	0.0132325	0.0247121	26	./Project_wg_result1777002351_GSEA/GO_0006040.png	9	302302;24188;296560;360518;84468;297417;89824;294673;307859	Aldh1a1;Chi3l1;Chst3;Chst5;Chst7;Gfpt1;Gfpt2;Hexb;Uap1l1
GO:0070661	leukocyte proliferation	http://amigo.geneontology.org/amigo/term/GO:0070661	-0.332521	-1.64093	0	0.0248381	197	./Project_wg_result1777002351_GSEA/GO_0070661.png	80	24747;156767;25464;25145;25402;25614;302811;291983;24780;362491;293135;498951;24771;116457;100360077;24699;25662;680006;25126;116557;25109;686326;24483;500590;317578;84426;363294;301227;50566;59086;25150;25670;301059;81810;29260;81521;155151;63868;170538;295338;25368;25599;29665;25193;60628;246240;25639;29185;25155;309684;686075;50689;29338;24508;308995;498666;25752;316369;294706;294797;304966;24…	Ada;Adk;Aif1;Casp3;Ccnd3;Cd180;Cd1d1;Cd24;Cd37;Cd38;Cd4;Cd6;Cd74;Clu;Coro1a;Ctnnb1;Cxcr4;Elf4;Emp2;Enpp3;Fcgr3a;Fkbp1a;Foxj1;Fyn;Gapt;Grem1;Hspd1;Icam1;Ifnar2;Igf1;Igf2;Igfbp2;Il13ra1;Il15;Il34;Il7r;Inpp5d;Irf1;Irgm;Itgal;Itgb2;Laptm5;Lrrc32;Lyn;Mad1l1;Mapk3;Mapk8ip1;Msn;Myd88;Nck2;Ncstn;P2rx7;Prdx2;Prkcd;Psmb10;Ptk2;Ptpn22;Ptpn6;Ptprc;RT1-M3-1;Ripk2;Ripk3;Sash3;Sdc4;Slc4a2;Stat5a;Stat5b;Syk;Tgfb…
GO:0001763	morphogenesis of a branching structure	http://amigo.geneontology.org/amigo/term/GO:0001763	-0.347606	-1.64205	0.00206186	0.0248335	157	./Project_wg_result1777002351_GSEA/GO_0001763.png	60	79558;81517;25589;25022;85272;304947;353252;89806;311508;298894;171356;287612;252833;24553;303634;25554;292770;25640;299737;83502;84426;50566;303828;25496;56083;59086;25267;81810;83508;24668;24318;303218;60628;140586;116640;246331;24890;498328;302993;65165;25236;25333;140588;81707;24482;499593;24179;171396;170922;79114;24247;308912;24883;25425;25697;84353;252929;114489;83718;25273	Acvr1;Agt;Bmp7;Casr;Cdh1;Clic4;Ctnnb1;Ctsh;Ctsl;Ctsz;Cxcr4;Dag1;Dchs1;Drd2;Esr1;Etv5;Fgfr1;Fgfr2;Foxc2;Gdf7;Gli3;Gna13;Gpc3;Grem1;Gzf1;Hnf1b;Hs3st3b1;Igf1;Ilk;Kdr;Mdk;Met;Mgp;Mks1;Mmp14;Mycn;Notch1;Nrp1;Ntn4;Pbx1;Pdgfra;Pkd2;Ppp1ca;Rdh10;Smo;Snai2;Sox2;Sox8;Sox9;Spint2;Sulf1;Tgfb1;Tgfbr2;Tgm2;Tie1;Timeless;Tmed2;Tnc;Wnt4;Wt1
GO:0002269	leukocyte activation involved in inflammatory response	http://amigo.geneontology.org/amigo/term/GO:0002269	-0.475083	-1.64361	0.022	0.0246943	33	./Project_wg_result1777002351_GSEA/GO_0002269.png	17	170897;266759;113959;364594;25423;301227;25265;301059;29260;298566;171056;252917;29143;361537;24854;310553;24516	C1qa;C5ar1;Clu;Ctsc;Cx3cr1;Grn;Hspa4;Jun;Myd88;Nr1d1;P2ry1;Sphk1;Tlr2;Tlr3;Tlr4;Trem2;Tyrobp
GO:0061008	hepaticobiliary system development	http://amigo.geneontology.org/amigo/term/GO:0061008	-0.344822	-1.64539	0	0.0244843	172	./Project_wg_result1777002351_GSEA/GO_0061008.png	72	29610;24705;24303;81767;79238;25106;79250;25262;81517;25315;289754;25737;24533;293345;25164;287612;25126;24941;24553;64192;25640;116549;84426;25496;59086;29285;140860;300445;81765;499443;140586;24252;289753;29637;246097;65984;113992;25631;683788;295691;503018;498328;140655;24451;24188;26956;25748;64033;140588;24967;81776;81766;64040;295347;24184;24450;29223;24158;79121;24165;24516;116676;313564;2…	Aacs;Acadm;Aco1;Aco2;Ada;Ak2;Ak3;Ak4;Alas2;Aldh1a1;Aldh1a2;Aldh2;Aldh9a1;Arf6;Atp7a;Ccnd1;Ccnd2;Cdkn2b;Cebpa;Cpt1a;Csnk2a1;Ctnnb1;Cyp2d3;Ephx1;Fas;Frzb;Fscn1;Gli3;Hmgcl;Hmgcs1;Hmgcs2;Hmox1;Hnf1b;Itpr1;Jun;Ldha;Lims1;Mdk;Met;Mks1;Mpst;Notch1;Pcna;Pkd2;Prkcsh;Psmb9;Ptn;Qdpr;Rap1a;Rara;Rgn;Rhbdd3;Rpl13;Rpl18;Rpl19;Rps15;Rps16;Rps24;Slco2b1;Smad3;Smo;Sox9;Stat5b;Taf10;Tgfb1;Tgfbr3;Ucp2;Ugt1a6;Wdr35;W…
GO:0051235	maintenance of location	http://amigo.geneontology.org/amigo/term/GO:0051235	-0.338447	-1.64596	0	0.0246406	199	./Project_wg_result1777002351_GSEA/GO_0051235.png	71	308390;85240;498185;287280;24699;24230;298675;25126;78968;81782;29337;24424;116504;56646;301227;59086;498910;155151;25617;117287;25059;305457;29665;25679;680423;65142;25639;300652;246097;303875;29209;29292;83727;308797;29302;498328;363091;24539;25728;192147;81814;65165;58851;362891;50594;83518;316122;59107;24932;171104;298199;117264;81515;50665;24655;79129;116689;300095;301113;300757;313949;24232…	Abhd5;Aplnr;Apoe;Arl2;Arl2bp;Aup1;C3;Casq2;Cd4;Cemip;Coro1a;Cpt1a;Cyba;Dbi;Ehd1;Fas;Fbn1;Fkbp1a;Fkrp;Ftl1;Gper1;Gstm2;Hexa;Hexb;Hk2;Hspa5;Itgb3;Itpr3;Kdelr1;Kdelr3;Ldah;Letm1;Lgals1;Lpl;Ltbp1;Lyn;Mprip;Mt3;Myzap;Nbl1;Nr1h2;Nrros;Os9;P2rx7;P2ry6;Park7;Pkd2;Plcb2;Plcd1;Plcg2;Plin2;Polr2m;Ptpn6;Ptprc;Rer1;Skp1;Slc25a23;Slc8b1;Soat1;Sorl1;Srebf1;Srebf2;Stat5a;Stat5b;Tgfb1;Tgfb2;Tmed2;Tmsb10;Tmsb4x;Tr…
GO:1901568	fatty acid derivative metabolic process	http://amigo.geneontology.org/amigo/term/GO:1901568	-0.456132	-1.64908	0.0118577	0.0242593	37	./Project_wg_result1777002351_GSEA/GO_1901568.png	9	117243;79244;113956;24450;363516;192227;690163;81639;171400	Abcd1;Acsl6;Alox15;Elovl5;Hmgcs2;Hsd17b4;Oxct1;Pecr;Ptgr1
GO:0001818	negative regulation of cytokine production	http://amigo.geneontology.org/amigo/term/GO:0001818	-0.352194	-1.65637	0	0.0229167	158	./Project_wg_result1777002351_GSEA/GO_0001818.png	62	60669;100360982;246774;25145;25402;302811;305081;293135;116777;361794;24699;24230;445269;84022;116557;291171;24553;363294;301227;58923;59086;314949;684440;29260;295338;25591;315599;171056;192281;690492;294207;25732;287362;54319;24451;25528;117183;378947;303538;308843;291981;24482;315047;25625;361537;303090;25239;116689;687001;301252;314870;79114;310553;54259;363516;85489;171114;114087;25717;81809…	Abcd1;Acp5;Apod;Aqp4;Banf1;Bst2;C5ar2;Casp3;Cd24;Cd33;Cd34;Cdh3;Cmklr1;Cx3cr1;Dhx58;Elf4;Ezr;Fgfr1;Foxj1;Ghsr;Gimap5;Hdac9;Hmox1;Hsp90ab1;Igf1;Inpp5d;Irak3;Irgm;Laptm4b;Laptm5;Lrrc32;Mefv;Met;Ndrg2;Nfkbil1;Nlrp3;Nlrx1;Nutf2;Oas1a;Parp1;Ppp1r11;Ptpn22;Ptpn6;Ptprc;Rad21;Relb;Rgcc;Sirpa;Tgfb1;Tgfb2;Tgfb3;Tlr2;Tlr4;Tlr8;Tnfrsf1a;Trem2;Trim27;Tsku;Tspo;Twist1;Twsg1;Tyrobp
GO:0042044	fluid transport	http://amigo.geneontology.org/amigo/term/GO:0042044	-0.560522	-1.6579	0.0119522	0.0229056	17	./Project_wg_result1777002351_GSEA/GO_0042044.png	7	54301;362013;81779;54320;25293;65054;50672	Ahcyl1;Aqp4;Aqp9;Ednrb;Pdpn;Sctr;Slc14a1
GO:0016032	viral process	http://amigo.geneontology.org/amigo/term/GO:0016032	-0.352685	-1.66102	0.0020202	0.0224503	160	./Project_wg_result1777002351_GSEA/GO_0016032.png	50	287818;296083;499801;311430;679787;54287;25599;192281;304549;116698;60628;29271;296384;114709;83618;688785;282834;361916;684097;309586;29302;362952;84496;686883;25728;29448;65190;362237;378947;361967;83730;29497;83462;25104;24932;498008;297995;298693;50567;25506;301252;24516;114087;25697;64367;308417;64303;114489;29502;246215	Apoe;Banf1;Bst2;Cd300lf;Cd4;Cd74;Cfl1;Chmp3;Chmp4c;Chmp5;Clec5a;Ctsl;Cxcr4;Dag1;Dynlt1;Eif2ak2;Eif3d;Hexim1;Hsp90ab1;Ifih1;Ifitm2;Isg15;Itgb3;Jun;Larp7;Mavs;Nectin2;Oas1a;Oasl2;P4hb;Pc;Pfn1;Ppib;Ppid;Ptbp1;Rab7a;Rest;Rsad2;Slc20a2;Slc3a2;Snx3;Stau1;Tbc1d20;Tpcn1;Trim26;Trim28;Trim8;Vamp8;Vps18;Znfx1
GO:0048880	sensory system development	http://amigo.geneontology.org/amigo/term/GO:0048880	-0.326531	-1.66326	0	0.0222891	269	./Project_wg_result1777002351_GSEA/GO_0048880.png	98	29458;25589;25022;685579;308596;171355;85272;292771;304947;353252;114501;360665;308390;94201;171356;294322;81818;83630;54249;309626;293098;25054;25492;25703;366031;25426;25644;686117;25246;296136;363294;25496;360652;29227;59086;25267;680476;81810;298566;24338;24318;25473;246060;365901;365748;140586;246331;85425;155012;84577;310914;310392;83727;311862;25631;361467;25420;24188;362326;25338;302993;3…	Actb;Aldh1a1;Aldh1a2;Bcar3;Bhlhe22;Bloc1s3;Bmp6;Bmp7;Bmpr1b;Bsg;C1qa;C3;Calb1;Cdk4;Cdkn1c;Cdon;Cfd;Cfh;Clic4;Crb2;Cryab;Cst3;Ctnnb1;Cyp1b1;Drd2;Ephb1;Fat1;Fbn1;Fgfr2;Fjx1;Fkrp;Foxc2;Gdf11;Gli3;Gnat2;Gpd2;Grn;Hdac1;Hdac2;Jmjd6;Jun;Kdr;Lamb2;Lamc3;Lmx1b;Lpcat1;Maf;Meis1;Neurod1;Nf2;Nfia;Nfib;Ninj1;Notch1;Nphp1;Nrp1;Ntrk2;Pax4;Pbx1;Pdgfra;Pknox1;Pou4f2;Ptn;Rarb;Rbp4;Rcn1;Rdh10;Rhoj;Ring1;Rom1;Rrm1;S…
GO:0045165	cell fate commitment	http://amigo.geneontology.org/amigo/term/GO:0045165	-0.354748	-1.66731	0	0.0218609	135	./Project_wg_result1777002351_GSEA/GO_0045165.png	43	500047;171356;25492;252833;25640;84426;25496;29227;366214;315196;305922;81507;306782;365748;140586;289026;266813;64186;59328;312495;25587;64465;302993;113984;140588;312478;289237;499593;303021;114850;79114;60394;117273;293165;24883;50938;282582;54320;25697;84353;81809;29452;25273	Ascl1;Bhlhe22;Bmpr1a;Cdc42;Cdon;Ctnnb1;Ctsl;Cyp26b1;Epas1;Fgfr1;Foxc2;Gdf7;Gli3;Hnf1b;Id2;Lats2;Loxl3;Nfia;Nfib;Nkx2-2;Notch1;Nr2f2;Olig1;Pdpn;Prrx1;Rhoa;Ror2;Sh3pxd2b;Slamf8;Smad5;Smo;Sox13;Sox2;Sox6;Sox8;Sox9;Tgfb2;Wnt16;Wnt4;Wnt5b;Wnt7a;Wnt7b;Wt1
GO:1904888	cranial skeletal system development	http://amigo.geneontology.org/amigo/term/GO:1904888	-0.448061	-1.66831	0.00394477	0.0218079	44	./Project_wg_result1777002351_GSEA/GO_1904888.png	19	59086;308577;25267;81810;691750;314694;266813;25631;364674;140588;81707;24482;361986;303021;29633;85489;84353;25717;81809	Chst11;Ctnnb1;Fuz;Gli3;Igf1;Mmp14;Ndst1;Pdgfra;Prrx1;Sh3pxd2b;Slc39a1;Smad3;Tgfb1;Tgfb2;Tgfb3;Tgfbr2;Tifab;Tmem107;Twist1
GO:0150076	neuroinflammatory response	http://amigo.geneontology.org/amigo/term/GO:0150076	-0.432814	-1.67175	0.00191571	0.0213647	53	./Project_wg_result1777002351_GSEA/GO_0150076.png	26	170897;299858;266759;113959;29337;364594;25423;25369;301227;25265;29260;362567;298566;171056;365901;252917;288227;29143;24482;24179;361537;24854;310553;296973;24516;25273	Adora2a;Agt;Bace2;Bpgm;C1qa;C5ar1;Clu;Ctsc;Cx3cr1;Gnat2;Grn;Hspa4;Igf1;Jun;Lrp1;Nr1d1;P2ry1;Plcg2;Pomgnt1;Smo;Sphk1;Tlr2;Tlr3;Tlr4;Trem2;Tyrobp
GO:0001890	placenta development	http://amigo.geneontology.org/amigo/term/GO:0001890	-0.383857	-1.67746	0	0.0204726	96	./Project_wg_result1777002351_GSEA/GO_0001890.png	40	245983;114093;290027;25022;64371;85272;291966;117524;29139;293345;81818;84022;24483;24553;292770;83502;25246;315196;360626;25591;394266;25571;116698;246060;309262;24252;24890;50689;498328;29344;65165;113984;501097;24655;25361;301252;24165;25697;24924;29452	Ada;Bmp7;Bsg;Ccnf;Cdh1;Cdkn1c;Cebpa;Ctsl;Dcn;Epas1;Esr1;Fgfr2;Ghsr;Gjb2;Hsp90ab1;Igf2;Il11ra1;Krt19;Mapk3;Mdfi;Met;Nr2f2;Nsdhl;Parp1;Parp2;Pkd2;Plcd1;Prdx3;Ptn;Spint2;St14;Taf10;Tmed2;Tppp3;Trim28;Ttpa;Vcam1;Vim;Wnt7b;Zfp36l1
GO:0032355	response to estradiol	http://amigo.geneontology.org/amigo/term/GO:0032355	-0.348348	-1.67805	0	0.0206008	168	./Project_wg_result1777002351_GSEA/GO_0032355.png	68	362100;24484;25402;25614;64547;140668;64639;171355;85272;81686;295279;64044;25737;25033;24468;81732;84607;81818;25662;84022;25126;116557;24483;25426;29565;84426;59086;25267;29393;394266;24808;24890;79212;25420;24188;29143;113984;54227;64033;24404;24932;680717;24482;171104;24314;84686;24179;24183;25307;25625;25541;296408;114850;50592;24232;362834;116676;25668;29539;64202;84353;24248;81809;25293;29…	Abcc3;Actr3;Agt;Ak1;Aldh1a1;Aldh1a2;Aldh2;Aqp4;Arpc1b;Bad;Bcl2l11;Bmp7;C3;Calr;Casp3;Casp8;Cat;Ccnd1;Ccnd2;Cd38;Cd4;Col1a1;Cryab;Cst3;Ctnnb1;Cyp1b1;Eef2;Endog;Esr1;Fam210b;Fcgr1a;Foxj1;Ghsr;Gjb2;Gper1;Gpx1;Gria1;Grn;Hspa8;Igf1;Igf2;Igfbp2;Igfbp3;Mbd3;Mmp15;Mmp2;Nqo1;Nr2f2;Pcna;Pdgfra;Pou4f2;Ppp1r9b;Ptk2;Ptn;Scp2;Slc6a1;Socs2;Sstr1;Stat5b;Tacr3;Tgfb1;Tgfb2;Tnfrsf1a;Vim;Wfdc1;Wnt4;Wnt7a;Zfp703
GO:0045216	cell-cell junction organization	http://amigo.geneontology.org/amigo/term/GO:0045216	-0.369383	-1.67836	0	0.0208094	128	./Project_wg_result1777002351_GSEA/GO_0045216.png	51	63836;116777;308390;313255;361921;315655;307644;25554;25644;84470;83502;296136;59086;50555;83501;298487;394266;499443;369016;360950;65142;24170;25631;311163;683788;290628;84407;287876;362918;64465;81756;83518;24660;301737;680717;305679;24179;81918;689710;50677;290485;81679;117273;307505;84353;171160;25717;24936;81809;25744;81822	Actb;Actg1;Actn4;Add1;Agt;Aplnr;Arl2;Bmp6;Cd9;Cdc42;Cdh1;Cdh11;Cdh2;Cdh3;Cldn10;Cldn19;Ctnna1;Ctnnb1;Ctnnd1;Ect2;Fer;Fkrp;Fscn1;Gjb2;Gnpat;Heg1;Hopx;Jup;Kifc3;Lims1;Mtss1;Myadm;Nf2;Nphp1;Ocel1;Pard3;Pmp22;Ptpro;Rab13;Rdx;Rhoa;Smad3;Snai2;Tgfb1;Tgfb2;Tgfb3;Ugt8;Vcl;Wdr1;Whrn;Zfp703
GO:0019216	regulation of lipid metabolic process	http://amigo.geneontology.org/amigo/term/GO:0019216	-0.343417	-1.68173	0	0.0204903	216	./Project_wg_result1777002351_GSEA/GO_0019216.png	77	290370;313020;79128;59295;24230;84022;25126;24479;78968;29337;24483;25554;365571;25644;84426;301227;288783;85239;170538;83791;65030;25599;25083;140586;300652;25256;316976;83618;24890;252917;25383;361467;25587;301024;25728;58851;140868;316122;94338;25104;287447;25287;362434;24482;171104;305795;289036;81779;24179;298947;24786;25625;25541;25239;25427;300095;25524;293023;64191;498795;310667;171548;68…	Abcd1;Abhd5;Abhd6;Acadl;Acadvl;Adipor1;Adra2a;Agt;Akt2;Apobec1;Apod;Apoe;Atp1a1;Bmp6;C3;Ccdc3;Cd74;Cers2;Cpt1a;Ctdnep1;Cyp51;Dab2;Dbi;Dhcr7;Dkk3;Dnajc15;Elovl5;Ephx2;Esr1;Etfbkmt;Fabp5;Fdps;Fmo1;Ghsr;Golm1;Gper1;Id2;Idh1;Igf1;Igf2;Klhl25;Lactb;Lpcat1;Lpcat3;Mid1ip1;Mlycd;Nr1d1;Nr1h2;Nucb2;Ormdl2;Pc;Pik3cg;Plcg2;Por;Prkcd;Psap;Rest;Scap;Scp2;Sctr;Smpd3;Snai2;Sod1;Sorl1;Sox9;Srebf1;Srebf2;Stat5a;St…
GO:0010463	mesenchymal cell proliferation	http://amigo.geneontology.org/amigo/term/GO:0010463	-0.478214	-1.69194	0.00576923	0.0188478	33	./Project_wg_result1777002351_GSEA/GO_0010463.png	17	25546;25589;25022;85272;298894;29227;298878;81810;81507;140586;266813;25236;79114;308912;84353;24924;25273	Bmp7;Bmpr1a;Ctnnb1;Dchs1;Fgfr1;Fgfr2;Gpc3;Kdr;Mycn;Nfib;Osr1;Prrx1;Ptn;Shox2;Smo;Sox9;Tgfbr2
GO:0060485	mesenchyme development	http://amigo.geneontology.org/amigo/term/GO:0060485	-0.348762	-1.69511	0	0.0184492	193	./Project_wg_result1777002351_GSEA/GO_0060485.png	60	690139;84426;50566;25496;59086;298878;308577;83501;81810;300673;315196;29393;81507;295062;29134;64896;499443;363142;116698;29271;140586;246331;84577;50689;308061;25631;361096;361726;295691;498328;29344;64465;302993;117183;116654;24586;312478;83518;81527;306790;364712;680717;289036;24179;79114;360468;83837;85489;116676;308912;24883;54320;84353;25717;114489;81809;498576;366270;25273;50672	Adipor1;Agt;Aldh1a2;Aplnr;Axin2;Bambi;Bcl9l;Bmpr1a;Cdc42;Cdh2;Cfl1;Col1a1;Ctnnb1;Dag1;Dchs1;Edn3;Ednrb;Emp2;Exoc4;Fgfr1;Frzb;Fuz;Grem1;Hdac2;Il17rd;Lims1;Loxl3;Mapk3;Ncam1;Nolc1;Notch1;Nrp1;Nrp2;Osr1;Pdcd6;Pdpn;Pkd2;Rbm24;Rgcc;Sdhaf2;Sema3b;Sema4d;Smad3;Smo;Sox4;Sox8;Sox9;Tgfb1;Tgfb2;Tgfb3;Tgfbr2;Trim28;Twist1;Wnt4;Wnt7b;Wt1;Wwtr1;Zfp36l1;Zfp703;Zic2
GO:0009611	response to wounding	http://amigo.geneontology.org/amigo/term/GO:0009611	-0.327059	-1.69783	0	0.0182033	326	./Project_wg_result1777002351_GSEA/GO_0009611.png	102	84032;56611;29337;24941;299996;303634;364594;84426;56646;301227;29474;29227;59086;309004;364183;25265;362587;25267;680476;298487;29260;362871;170538;288057;24312;24318;25083;25473;60628;64026;116510;58960;116640;54237;25155;246331;685781;155012;282834;29338;361916;84492;310392;364206;114107;292401;25631;29302;303311;316014;308598;29344;24411;24451;287876;312728;25728;29143;308843;24586;79120;2957…	Actg1;Adam17;Adra2a;Aif1;Alox15;Anxa2;Anxa5;Apod;Apoe;Arf4;Arhgef19;Atp7a;Bloc1s3;Bloc1s4;C1galt1c1;Casp7;Cd9;Cdk1;Cfh;Chmp3;Chmp4c;Chmp5;Chst3;Cldn19;Col3a1;Coro1b;Cst3;Ctnna1;Cxcr4;Dag1;Ddr2;Dhfr;Drd2;Elk3;Entpd2;Fcer1g;Gna13;Gpx1;Grin2c;Grn;Gstm1;Hmox1;Hps5;Igf1;Itgb3;Jun;Kank1;Kremen1;Lamb2;Lgals1;Lyn;Macf1;Map2k2;Matn2;Mylk;Nbeal2;Ncam1;Nfib;Nrp1;P2ry1;Pard3;Pdgfra;Pdia3;Pdia4;Pdia6;Pdpn;Plc…
GO:0090130	tissue migration	http://amigo.geneontology.org/amigo/term/GO:0090130	-0.340182	-1.69872	0	0.0182965	221	./Project_wg_result1777002351_GSEA/GO_0090130.png	73	361568;305471;171356;100361376;63865;29337;24483;25426;24553;25554;686310;50566;25496;29474;59086;362587;81810;293783;155151;83823;501563;60628;140586;100363275;246331;309684;308061;292401;29302;500200;24451;314148;25728;79210;117183;81756;81814;29143;113984;29186;299145;24404;81823;362578;24482;289036;24179;298947;25291;367166;309429;305552;687001;79121;114850;79114;81679;25414;24516;365037;3604…	Adam17;Adgra2;Adipor1;Agt;Anxa3;Apoe;Arf6;Arsb;Atoh8;Bcar1;Calr;Cd63;Cib1;Clec14a;Coro1a;Coro1b;Ctsh;Cxcr4;Cyp1b1;Emc10;Emp2;Ephb4;Fgfr1;Foxc2;Fstl1;Gipc1;Gpx1;Grem1;Grn;Hdac9;Hmox1;Hyal1;Igf1;Igf2;Itgb2;Itgb3;Jun;Jup;Kank1;Kank2;Lgmn;Lpxn;Macf1;Met;Notch1;Nr2f2;Nrp1;Patz1;Pdcd6;Pfn1;Pik3cg;Plcg2;Prkx;Ptn;Rab13;Rgcc;Rhoa;Rhoj;Rras;Sash1;Smoc2;Snai2;Sox9;Stat5a;Svbp;Tgfb1;Tgfb2;Tgfbr2;Tmsb4x;Vhl;V…
GO:0003158	endothelium development	http://amigo.geneontology.org/amigo/term/GO:0003158	-0.38064	-1.70191	0.00192678	0.0179593	104	./Project_wg_result1777002351_GSEA/GO_0003158.png	47	79558;305081;25589;497979;29618;89806;171356;497987;315655;24553;25644;25496;301059;81521;81507;369016;60628;64512;81743;24170;29415;313706;81754;500200;50671;54319;79210;113984;294809;24404;29733;305679;24179;295347;310460;25625;689710;171337;117273;288583;54320;84353;25717;83718;24874;24924;50672	Acvr1;Adamts12;Add1;Agt;Arhgef26;Atoh8;Bmp6;Bmpr1a;Btg1;Cd34;Clic4;Ctnnb1;Cxcr4;Ednrb;Ezr;Fasn;Foxc2;Fstl1;Fzd2;Gpx1;Heg1;Hoxb5;Kdr;Met;Msn;Myadm;Myd88;Notch1;Nr2f2;Pde2a;Pdpn;Plod3;Ptn;Rab1a;Rap1a;Rap1b;Rdx;Rhoa;S1pr1;S1pr2;Tgfb3;Tie1;Tmem100;Tnfrsf1a;Ubiad1;Vcl;Vhl
GO:0006520	amino acid metabolic process	http://amigo.geneontology.org/amigo/term/GO:0006520	-0.35733	-1.70368	0	0.0178833	162	./Project_wg_result1777002351_GSEA/GO_0006520.png	45	117287;298934;24312;685325;317675;171522;64157;361884;360821;364064;24962;305177;308457;310392;29711;24513;24188;294239;60356;58835;24311;306879;25502;300726;114123;29483;360518;63938;687008;24250;296925;288174;24609;24399;64300;288583;300981;297417;63864;192172;81632;246307;64203;54315;114027	Aass;Abat;Acy1;Adi1;Aldh1a1;Asrgl1;Bcat2;Bckdhb;Cbs;Csad;Cth;Cyp2d4;Dao;Ddah1;Ddah2;Ddc;Ddo;Dhfr;Egln2;Enoph1;Etfa;Fars2;Gatc;Gfpt1;Gfpt2;Glud1;Hibadh;Hsd17b10;Ivd;Mccc2;Mpst;Mthfd1;Nit2;Oaz1;Odc1;Park7;Pcca;Phgdh;Plod3;Pycr2;Sardh;Slc1a3;Slc7a11;Tph2;Ucp2
GO:0097581	lamellipodium organization	http://amigo.geneontology.org/amigo/term/GO:0097581	-0.414453	-1.70544	0.00387597	0.0177541	68	./Project_wg_result1777002351_GSEA/GO_0097581.png	23	29474;306941;308765;360854;29271;89817;362973;595134;298584;683788;303476;64465;316369;313024;24660;301737;305938;29733;308666;305679;309429;50677;54320	Abi3;Akirin1;Arpc5;Arpin;Capzb;Carmil1;Cdc42;Cfl1;Coro1b;Cyfip1;Fer;Fscn1;Kank1;Nck2;Parvb;Pdpn;Pmp22;Ptpro;S1pr1;Sh2b1;Spata13;Vcl;Wasf2
GO:0022612	gland morphogenesis	http://amigo.geneontology.org/amigo/term/GO:0022612	-0.392632	-1.70982	0	0.01712	93	./Project_wg_result1777002351_GSEA/GO_0022612.png	41	25262;81517;25022;85272;81686;289754;691657;252833;24553;25554;299737;83502;84426;363294;303828;25496;29227;56083;59086;81810;81521;499443;140586;116640;246331;24890;311163;54319;64465;140588;24482;171396;79114;25429;24918;25717;114489;81809;25285;24924;25273	Bmp7;Cdc42;Cdh1;Crip1;Ctnnd1;Cyp7b1;Dag1;Esr1;Etv5;Ezr;Fgfr1;Fgfr2;Gdf7;Gli3;Igf1;Igfbp5;Itpr1;Lims1;Mdk;Met;Mmp2;Msn;Nfib;Notch1;Nrp1;Ntn4;Ptn;Smo;Snai2;Sox9;Stat5a;Sulf1;Tgfb1;Tgfb2;Tgfb3;Tgfbr2;Tgm2;Tnc;Twsg1;Wnt4;Xbp1
GO:0002274	myeloid leukocyte activation	http://amigo.geneontology.org/amigo/term/GO:0002274	-0.368203	-1.71112	0	0.0170649	138	./Project_wg_result1777002351_GSEA/GO_0002274.png	55	360665;64554;266759;113959;287722;25109;29337;364594;25423;58949;301227;59086;287719;25670;25265;301059;57302;81810;29260;287818;25097;63868;170538;298566;171056;690492;24252;29185;25155;309684;252917;81804;24518;24451;29143;83730;245962;366126;301737;304966;81515;25291;361537;29528;303090;116689;24854;54410;317676;310553;314654;24516;29427;25441;308417	Aif1;Anxa3;C1qa;C5ar1;Cd1d1;Cd300lf;Cd33;Cd37;Cd48;Cebpa;Clu;Cnr2;Ctsc;Cx3cr1;Enpp3;Fcer1g;Fcgr3a;Fer;Grn;Hmox1;Hspa4;Hspd1;Ifi35;Il15;Irgm;Itgb2;Jmjd6;Jun;Jund;Lat2;Lyn;Myd88;Myo1f;Nectin2;Nr1d1;P2ry1;Plcg2;Pld2;Prkcd;Ptafr;Ptpn6;Slc7a2;Spi1;Stxbp2;Syk;Tgfb1;Tgfbr2;Tlr2;Tlr3;Tlr4;Tmem106a;Trem2;Tyrobp;Vamp3;Vamp8
GO:0042063	gliogenesis	http://amigo.geneontology.org/amigo/term/GO:0042063	-0.33267	-1.71242	0	0.0171149	302	./Project_wg_result1777002351_GSEA/GO_0042063.png	104	81732;361568;113959;25164;81818;24230;25054;25492;29596;362550;84032;24553;299996;29565;25613;114099;25369;301227;303828;25496;29227;59086;366214;362361;501164;25265;297994;83501;301059;29260;298566;171056;497913;306782;25473;60628;360950;140586;58960;54238;246097;81523;289026;303875;84577;50689;252917;64186;64824;311862;282840;288227;25587;25742;361035;25728;302993;29143;58835;116654;361596;1405…	Actr3;Adora2a;Agt;Akt2;Apoe;Ascl1;Atf5;Bace2;Bag1;Bcan;C1qa;C5ar1;Cd9;Cdh2;Cdk5r2;Cdkn2b;Cdkn2c;Cers2;Clu;Cnp;Cntn1;Col3a1;Ctnnb1;Cx3cr1;Cxcr4;Cysltr1;Dag1;Dbi;Eef2;Eif2b1;Etv5;Exoc4;Fas;Gfap;Gjc2;Gli3;Gpr17;Grn;Hdac1;Hdac2;Hexb;Hnrnpa2b1;Id2;Idh2;Ifrd1;Igf1;Ilk;Kcnj10;Lamb2;Lamc3;Lgi4;Lyn;Map2k2;Mapk3;Matn2;Met;Metrn;Mettl3;Mmp14;Myd88;Myoc;Nab1;Ncstn;Nf2;Nfia;Nfib;Nkx2-2;Notch1;Nr1d1;Nrros;Ntrk…
GO:0006959	humoral immune response	http://amigo.geneontology.org/amigo/term/GO:0006959	-0.439579	-1.71432	0.00203666	0.0171663	52	./Project_wg_result1777002351_GSEA/GO_0006959.png	25	246774;192262;303687;24699;54249;171569;116557;312705;64023;301227;25496;298566;56759;29687;29185;155012;54243;408246;117183;295703;25347;29558;116689;24232;24825	C1qa;C1qb;C1r;C1rl;C1s;C3;Cd37;Cfd;Cfh;Cr1l;Evpl;Fcgrt;Foxj1;Gimap5;Masp1;Notch1;Ptpn6;Ptprc;Rgcc;Rnase4;Rpl39;Serping1;Spon2;Tf;Trem2
GO:0035456	response to interferon-beta	http://amigo.geneontology.org/amigo/term/GO:0035456	-0.508516	-1.71788	0.00188324	0.0169089	27	./Project_wg_result1777002351_GSEA/GO_0035456.png	13	299602;361673;314336;686326;364594;192281;114709;171164;24508;378947;287231;303090;246208	Bst2;Cdc34;Ddx41;Gbp2;Ifi47;Ifitm2;Ifitm3;Ifnar2;Irf1;Irgm;Oas1a;RGD1559575;Tlr3
GO:0007015	actin filament organization	http://amigo.geneontology.org/amigo/term/GO:0007015	-0.335718	-1.7187	0	0.0170143	285	./Project_wg_result1777002351_GSEA/GO_0007015.png	112	25687;308596;361881;83527;290396;287931;288669;63836;304282;287285;313702;308875;85428;24771;81732;282843;114108;297339;116653;84022;315655;100361376;313838;291171;100360501;29480;24553;315121;81824;84426;81917;29474;306941;308765;25418;113940;155151;170538;304983;289785;360854;369016;25230;81778;29271;360950;24170;246331;301709;81523;499702;364206;298584;25631;683788;361617;54319;361422;287876;3…	Actg1;Actn4;Actr3;Add1;Add3;Aif1;Alox15;Arap1;Arf6;Arfip1;Arhgap25;Arhgap28;Arpc1a;Arpc1b;Arpc3;Arpc5;Arpin;Baiap2l1;Bcar1;Cald1;Cap1;Cap2;Capg;Capzb;Carmil1;Cdc42;Cdc42ep1;Cdc42ep3;Cdc42ep4;Cfl1;Cnn3;Coro1a;Coro1b;Coro2b;Cotl1;Cyfip1;Dbnl;Diaph3;Dpysl3;Dstn;Emp2;Espn;Ezr;Fat1;Fer;Flii;Fscn1;Gdpd2;Ghsr;Gmfg;Hip1r;Hsp90b1;Inppl1;Kank1;Kank2;Kank4;Limd2;Mad2l2;Marcksl1;Met;Mtss1;Myadm;Myo1e;Myo1f;M…
GO:0050778	positive regulation of immune response	http://amigo.geneontology.org/amigo/term/GO:0050778	-0.330432	-1.72921	0	0.0155848	352	./Project_wg_result1777002351_GSEA/GO_0050778.png	130	361794;24468;361730;311786;246239;297968;113959;24699;24605;54249;445269;304545;294228;25126;303350;78968;293624;25109;312705;29337;362619;364594;58949;317578;64023;317259;301227;58923;499356;59086;25150;287719;317468;500251;25670;684440;298784;60350;301059;293783;29260;65041;287818;94342;63868;298566;499801;311430;500561;295338;294269;25591;117287;315599;114203;54287;289785;25599;25297;29665;192…	Ada;Akirin2;Arid5a;B2m;Bag6;Banf1;Bcar1;Blnk;Brcc3;C1qa;C1qb;C1r;C1rl;C3;C3ar1;C5ar1;C5ar2;Cacnb3;Cd14;Cd1d1;Cd300lf;Cd38;Cd4;Cd74;Cfd;Cfh;Clpb;Colec12;Cr1l;Cyba;Dhx58;Ecsit;Eif2ak2;Eif2b1;Esr1;Ezr;Fcer1g;Fyn;Gbp2;Gbp5;Gpr108;Hexim1;Hmces;Hspa8;Hspd1;Ifi35;Ifih1;Il15;Ipo5;Irak3;Irf1;Irf7;Irgm;Itgb2;Khdrbs1;Lamp1;Laptm5;Lat2;Lpxn;Lyn;Mapkapk2;Mapkapk3;Masp1;Mavs;Mefv;Myd88;Myo1g;Nectin2;Nfam1;Nfkb…
GO:0071806	protein transmembrane transport	http://amigo.geneontology.org/amigo/term/GO:0071806	-0.455192	-1.72982	0.00197239	0.0157314	43	./Project_wg_result1777002351_GSEA/GO_0071806.png	16	290370;24468;54312;680476;25617;63868;308718;312903;307210;298068;308416;80843;305581;685620;84599;50672	Bloc1s3;Dnajc15;Ednrb;Hspa5;Hspa8;Hspd1;Pex13;Pex7;Sec61a1;Sec61b;Timm21;Timm23;Tmed10;Tomm40;Tomm7;Tram1
GO:0050865	regulation of cell activation	http://amigo.geneontology.org/amigo/term/GO:0050865	-0.339158	-1.73941	0	0.0143383	322	./Project_wg_result1777002351_GSEA/GO_0050865.png	134	116479;24705;84586;308589;25232;24747;156767;246774;25464;25145;25402;24780;81517;64639;362491;170897;289754;65138;293135;361288;303281;313702;64554;24771;116457;100360077;266759;297968;24699;25662;680006;25126;116557;25109;24483;500590;25423;690369;317578;686310;56646;363294;25369;301227;59086;54260;500251;25670;301059;57302;25267;680476;81810;29260;287818;155151;63868;170538;500561;295338;29426…	Ada;Adk;Adora2a;Adrm1;Aif1;Akirin2;Apoe;B2m;Bad;Bloc1s3;Casp3;Cd1d1;Cd24;Cd300lf;Cd33;Cd37;Cd38;Cd4;Cd6;Cd74;Cd9;Cebpa;Clptm1;Cnr2;Coro1a;Ctnnb1;Ctsc;Cyp26b1;Ddr2;Efnb3;Enpp3;Ephb4;F11r;Fas;Fcer1g;Fcgr3a;Fer;Fgfr1;Fgl2;Foxj1;Fundc2;Gimap5;Gli3;Gper1;Grn;Hmces;Hspa4;Hspd1;Icam1;Id2;Igf1;Igf2;Igfbp2;Il13ra1;Il15;Il15ra;Il7r;Inpp5d;Irf1;Irgm;Itgal;Itpkb;Jund;Klhl25;Laptm5;Lgals1;Loxl3;Lrrc32;Lyn;Mad…
GO:0060416	response to growth hormone	http://amigo.geneontology.org/amigo/term/GO:0060416	-0.497211	-1.74074	0.00373832	0.0143338	33	./Project_wg_result1777002351_GSEA/GO_0060416.png	16	24484;25614;65138;84607;84022;25126;24508;56766;64033;289144;25235;24482;83782;24450;24918;25285	Adrm1;Cacybp;Ccnd2;Ghr;Ghsr;Hmgcs2;Igf1;Igfbp3;Igfbp5;Irf1;Leprot;Nme2;Ptk2;Socs2;Stat5a;Stat5b
GO:0048483	autonomic nervous system development	http://amigo.geneontology.org/amigo/term/GO:0048483	-0.540278	-1.74123	0.00394477	0.014508	25	./Project_wg_result1777002351_GSEA/GO_0048483.png	10	84348;246331;64186;302993;81527;364712;25361;84353;25273;50672	Ackr3;Ascl1;Ctnnb1;Ednrb;Nrp1;Nrp2;Smo;Sox4;Sox8;Vcam1
GO:0001819	positive regulation of cytokine production	http://amigo.geneontology.org/amigo/term/GO:0001819	-0.344333	-1.74214	0	0.0146067	262	./Project_wg_result1777002351_GSEA/GO_0001819.png	95	363938;311786;297968;113959;116996;24699;24605;287722;25126;303350;171569;293624;25109;291171;29337;25426;364594;58949;315435;317578;301227;58923;59086;317468;498272;314949;25670;684440;298784;60350;301059;29260;63868;499801;311430;295338;117287;81507;679787;24318;54287;25599;29665;192281;25083;364867;300652;25155;362050;84577;501095;316327;84007;24508;81754;25631;295357;287362;309172;24539;25752…	Adam17;Adra2a;Afap1l2;Agpat1;Agt;Aif1;Akirin2;Arid5a;B2m;Bmpr1a;C3;C3ar1;C5ar1;Cd14;Cd1d1;Cd6;Cd74;Chi3l1;Clec5a;Clu;Cyba;Cyp1b1;Dhx58;Drd2;Eif2ak2;Fcer1g;Fcgr3a;Frmd8;G3bp1;Gbp5;Hdac1;Hdac2;Heg1;Hspd1;Ifih1;Il15;Il16;Il17ra;Irak3;Irf1;Irf7;Isg15;Lamtor5;Laptm5;Lpl;Lum;Mapkapk2;Mavs;Mefv;Myd88;Nfam1;Nlrc4;Nlrp3;Nras;Oas1a;Oas2;P2rx7;Panx1;Park7;Plcg2;Ptafr;Ptpn22;Ptprc;Rab1a;Rab7b;Rad21;Rftn1;Rgc…
GO:0032615	interleukin-12 production	http://amigo.geneontology.org/amigo/term/GO:0032615	-0.491846	-1.74303	0.00587084	0.0146881	31	./Project_wg_result1777002351_GSEA/GO_0032615.png	16	60669;24747;81517;116996;29337;364594;58923;684440;29260;63868;25732;25155;24508;314870;310553;89783	Acp5;Cmklr1;Hspd1;Il16;Irak3;Irf1;Laptm5;Mdk;Mefv;Plcg2;RT1-M3-1;Syk;Tlr2;Tlr3;Tlr4;Tlr8
GO:0031214	biomineral tissue development	http://amigo.geneontology.org/amigo/term/GO:0031214	-0.397974	-1.7446	0	0.0147095	103	./Project_wg_result1777002351_GSEA/GO_0031214.png	44	309453;24780;79558;25022;85272;295106;294337;308390;81733;25644;84426;50566;25496;59086;298878;29403;29393;81507;29134;29665;306782;362065;140586;685781;84482;310914;25631;300260;362918;25236;25333;94338;303635;29733;24482;298693;79114;304334;85489;313564;25586;29502;24924;81639	Acvr1;Alox15;Alpl;Asgr2;Axin2;Bmp6;Bmp7;Bmpr1a;Bmpr1b;Col1a1;Col6a1;Ddr2;Fam20a;Fam20c;Fbxl15;Fgfr1;Fgfr2;Fkrp;Foxo1;Gpc3;Grem1;Ift80;Igf1;Isg15;Mgp;Mtss1;Nell1;Notch1;Osr1;P2rx7;Ptn;Ror2;S1pr1;Slc20a2;Slc4a2;Smad3;Smpd3;Sox9;Sp7;Tgfb1;Twist1;Wls;Wnt4;Zmpste24
GO:0002764	immune response-regulating signaling pathway	http://amigo.geneontology.org/amigo/term/GO:0002764	-0.34509	-1.74996	0	0.0141821	258	./Project_wg_result1777002351_GSEA/GO_0002764.png	96	361794;24468;361730;246239;113959;24699;24605;445269;304545;303350;293624;29337;362619;364594;301227;58923;499356;25150;287719;317468;684440;60350;301059;293783;29260;65041;287818;94342;63868;499801;311430;500561;295338;25591;315599;114203;54287;289785;25297;192281;116477;246280;690492;364867;171121;25155;306182;362050;24890;364405;501095;171164;84492;252917;84007;24508;117268;287362;54319;361289…	Ada;Bag6;Banf1;Bcar1;Blnk;Brcc3;C3;C3ar1;C5ar1;C5ar2;Cacnb3;Cd14;Cd300lf;Cd33;Cd38;Clpb;Colec12;Ctsh;Cyba;Dhx58;Ecsit;Eif2ak2;Eif2b1;Esr1;Ezr;Fcer1g;Fcgr3a;Fcgrt;Fer;Fyn;Gbp2;Gbp5;Gpr108;Hspa8;Hspd1;Ifi35;Ifih1;Ipo5;Irak3;Irf1;Irf7;Irgm;Khdrbs1;Laptm5;Lat2;Lpxn;Lyn;Mapkapk2;Mapkapk3;Mavs;Mefv;Myd88;Myo1g;Nectin2;Nfam1;Nfkbil1;Ninj1;Nlrp3;Nlrx1;Nr1d1;Nras;Oas1a;Oasl;Parp1;Plcg2;Ppp6c;Ptpn22;Ptpn6;…
GO:0007584	response to nutrient	http://amigo.geneontology.org/amigo/term/GO:0007584	-0.361838	-1.75271	0	0.0139384	192	./Project_wg_result1777002351_GSEA/GO_0007584.png	71	140447;25244;25164;81818;24230;25662;100361376;78968;25426;25554;29565;84470;59086;85239;25670;81810;83474;29393;54287;25571;64512;116640;24252;25732;29637;315222;65984;64186;25056;312495;50671;29711;24451;117243;301024;24539;362029;25333;59107;81805;24404;24932;24482;24314;25027;29345;24250;25361;24450;24158;25260;81716;24165;29468;29441;24247;25045;116676;192275;25227;246074;310378;25586;25757;…	Aacs;Acadm;Acp5;Acsl6;Ada;Agl;Aldh1a2;Alpl;Arsa;Arsb;Ascl1;Bckdha;Bckdhb;Casr;Cat;Cbs;Ccnd1;Cd4;Cdkn2b;Cebpa;Col1a1;Cpt1a;Cyp1b1;Cyp26b1;Dad1;Dbi;Eef2;Eif2ak2;Fads1;Fasn;Fzd2;Ggcx;Gnpat;Gpx1;Gstt1;Hmgcs1;Hmgcs2;Hmox1;Igf1;Igfbp2;Il15;Kank2;Lpl;Ltbp1;Mgp;Mlycd;Nnt;Nqo1;Oxct1;Pdia3;Pld1;Por;Ptn;Rbp1;Scap;Scd;Serpinh1;Slc16a1;Slc8a2;Snai2;Srebf1;Suox;Tfam;Tgfb1;Tgfb2;Tgfbr2;Tnc;Tspo;Ttpa;Vcam1;Vim
GO:0002064	epithelial cell development	http://amigo.geneontology.org/amigo/term/GO:0002064	-0.370803	-1.75586	0	0.0137303	155	./Project_wg_result1777002351_GSEA/GO_0002064.png	58	171356;81818;362015;315655;116557;24553;290843;292770;25644;83502;25496;59086;366214;83501;301059;81521;25473;369016;60628;81743;140586;24252;24170;29415;313706;24890;81754;50671;295691;54319;79244;302993;81756;362237;24706;25484;301737;24404;305679;24179;295347;310460;81918;25307;25625;689710;25524;288652;305230;171337;29454;83720;24883;288583;83718;29452;25273;50672	Add1;Agt;Ampd2;Arhgef26;Bmp6;Cdh1;Cdh2;Cebpa;Clic4;Cst3;Cxcr4;Ednrb;Epas1;Esr1;Ezr;Fasn;Fat1;Fer;Foxc2;Foxj1;Frzb;Gdf11;Gpat4;Gpx1;Heg1;Hsd17b4;Lamb2;Met;Msn;Myadm;Myd88;Myo1e;Nkx2-2;Notch1;Pard3;Pde2a;Plod3;Psap;Rab13;Rab1a;Rap1a;Rap1b;Rarb;Rdx;Rilpl2;S1pr2;Shroom3;Smo;Sox8;Sox9;Spint2;Tbc1d20;Tgfb1;Tnfrsf1a;Ubiad1;Vcl;Vim;Wt1
GO:0042476	odontogenesis	http://amigo.geneontology.org/amigo/term/GO:0042476	-0.408796	-1.75858	0	0.0136928	79	./Project_wg_result1777002351_GSEA/GO_0042476.png	30	25246;50664;59086;298878;25267;315196;498769;29393;81507;29134;362065;116640;84577;84482;300260;140588;94338;303635;25585;79114;298518;304334;117273;297893;307505;84353;25586;25744;24596;25273	Alpl;Axin2;Bmpr1a;Bsg;Col1a1;Csf3r;Ctnna1;Ctnnb1;Edaradd;Fam20a;Fam20c;Fgfr1;Foxo1;Gli3;Gnao1;Hdac1;Hdac2;Id3;Nf2;Ngfr;Osr1;Pdgfra;Rhoa;Smo;Smpd3;Sp7;Tgfb1;Tnc;Wls;Wnt7b
GO:0010324	membrane invagination	http://amigo.geneontology.org/amigo/term/GO:0010324	-0.472706	-1.75987	0.00375234	0.0136541	44	./Project_wg_result1777002351_GSEA/GO_0010324.png	15	56084;309684;684097;291445;314543;64465;25528;246324;310097;29427;24232;117273;25441;500246;81639	Aif1;Alox15;Arhgap25;C3;Cdc42;Fcer1g;Gulp1;Hgs;Itgb2;Megf10;Rab31;Rhoa;Sirpa;Snx18;Snx3
GO:0033687	osteoblast proliferation	http://amigo.geneontology.org/amigo/term/GO:0033687	-0.5368	-1.76896	0.00390625	0.0128334	26	./Project_wg_result1777002351_GSEA/GO_0033687.png	16	25022;29158;295106;498194;81733;50566;54287;29134;25631;29302;502715;302993;282836;117273;25744;316009	Axin2;Cthrc1;Eif2ak2;Fbln5;Fgfr2;Grem1;Ift80;Itgb3;Lrrc17;Mn1;Nell1;Nf2;Plxnb1;Rhoa;Smad3;Sox8
GO:0002683	negative regulation of immune system process	http://amigo.geneontology.org/amigo/term/GO:0002683	-0.349415	-1.78387	0	0.011143	268	./Project_wg_result1777002351_GSEA/GO_0002683.png	93	361794;289707;24771;24468;361730;24699;445269;680006;116557;291171;84032;24483;362619;25554;363294;25369;308901;301227;50566;58923;59086;57302;293783;287818;295338;25591;300985;315599;24318;171056;25599;192281;140586;690492;24252;29185;289753;171121;25732;246097;29338;252917;24508;83727;54243;54319;25587;24451;502715;361035;378947;303538;29143;50594;140588;366126;312478;316136;294797;295703;30173…	Acp5;Ada;Adora2a;Alox15;Apod;Banf1;Bst2;C5ar2;Cd300lf;Cd33;Cd37;Cd74;Cebpa;Cnr2;Col3a1;Cr1l;Ctnnb1;Cx3cr1;Dhx58;Drd2;Enpp3;Ezr;Fas;Fbn1;Fcer1g;Fer;Foxj1;Gli3;Gper1;Gpr108;Gpr17;Gpx1;Grem1;Grn;Hmox1;Hspa8;Id2;Igf1;Igf2;Il7r;Inpp5d;Irak3;Irf1;Irgm;Isg15;Laptm5;Loxl3;Lpxn;Lrrc17;Lyar;Lyn;Mad1l1;Mefv;Mettl3;Nbl1;Nfkbil1;Nlrx1;Nme2;Nr1d1;Oas1a;Padi2;Parp1;Parp3;Ppp6c;Prdx2;Ptpn22;Ptpn6;Ptprc;Rab7b;Rhb…
GO:0032103	positive regulation of response to external stimulus	http://amigo.geneontology.org/amigo/term/GO:0032103	-0.343105	-1.78682	0	0.0109615	338	./Project_wg_result1777002351_GSEA/GO_0032103.png	124	498951;361794;24468;361730;246239;297968;113959;116996;84022;304545;25126;303350;78968;63865;293624;29337;24553;362619;364594;25423;29473;25644;56646;317259;301227;58923;59086;287719;317468;684440;298784;60350;301059;25267;29260;65041;287818;63868;499801;311430;295338;25591;117287;315599;54287;171056;25599;192281;116477;60628;246280;81743;296384;24252;364867;171121;25155;246331;306182;362050;2489…	Adam17;Aif1;Akirin1;Akirin2;Akt2;Aoc3;Banf1;Bmp6;Brcc3;C3;C3ar1;C5ar1;Calr;Casr;Cd14;Cd180;Cd300lf;Cd74;Cebpa;Clpb;Colec12;Ctsc;Cx3cr1;Cxcr4;Cyba;Dhx58;Ecsit;Edn3;Eif2ak2;Esr1;Fbn1;Fcer1g;Fgfr1;Gbp2;Gbp5;Ghsr;Gpr108;Grn;Hexim1;Hspa8;Hspd1;Ifi35;Ifih1;Il16;Il17ra;Il34;Ipo5;Irak3;Irf1;Irf7;Irgm;Lamp1;Lgals1;Lgmn;Lpl;Ly86;Lyn;Mapk3;Mapkapk2;Mapkapk3;Mavs;Mefv;Met;Myd88;Nectin2;Nfkbil1;Ninj1;Nlrc4;Nl…
GO:0031589	cell-substrate adhesion	http://amigo.geneontology.org/amigo/term/GO:0031589	-0.364359	-1.8004	0	0.00953877	222	./Project_wg_result1777002351_GSEA/GO_0031589.png	77	299737;25613;84426;56646;361624;50566;25496;306941;117036;362587;64387;293783;155151;317470;29283;29393;24338;499443;289785;362393;25473;369016;501563;81778;29271;65142;302248;246331;362973;81523;309684;311862;292401;308995;81754;25631;29302;57341;84407;287876;64465;25338;25528;300030;81707;294809;29186;301737;64391;294925;81823;680419;288038;305679;24179;309429;25393;305552;29528;25361;25239;255…	Actg1;Adamts12;Agt;Akip1;Alox15;Antxr1;Apod;Arl2;Bcan;Bcar1;Calr;Carmil1;Ccdc80;Cd63;Cdc42;Cdh11;Cfl1;Cib1;Col1a1;Coro1a;Coro2b;Ctnnb1;Dag1;Dapk3;Egfl6;Emp2;Ephb1;Fer;Fndc3b;Grem1;Hsd17b12;Ilk;Itgal;Itgb2;Itgb3;Jup;Kank1;Lamb2;Lamc1;Lamc3;Lgals1;Lims1;Lpxn;Macf1;Meltf;Mmp14;Myadm;Myo1g;Myoc;Nid2;Ninj1;Notch1;Nrp1;Ntn4;P4hb;Parva;Parvb;Pdpn;Prex1;Prkx;Ptn;Ptprz1;Rab1a;Rhoa;Rhpn1;Rpl29;Rsu1;S100a10…
GO:0070670	response to interleukin-4	http://amigo.geneontology.org/amigo/term/GO:0070670	-0.533504	-1.80312	0.00594059	0.00951815	27	./Project_wg_result1777002351_GSEA/GO_0070670.png	14	289754;25374;94201;25126;287818;155151;25617;83789;50671;102554393;312538;301252;64205;24918	Adamts13;Alad;Cd300lf;Cdk4;Coro1a;Fasn;Hsp90ab1;Hspa5;Mcm2;Rplp0;Rps2;Stat5a;Stat5b;Xbp1
GO:0001503	ossification	http://amigo.geneontology.org/amigo/term/GO:0001503	-0.356791	-1.80879	0	0.00924551	271	./Project_wg_result1777002351_GSEA/GO_0001503.png	91	689284;25554;25644;84426;363294;50566;25496;59086;298878;29403;315196;29393;81507;295062;679787;29134;29665;306782;140586;24252;25654;29313;25732;685781;363481;81523;83618;24890;50689;310914;83427;64824;59328;114107;25631;308718;81774;24518;300260;25587;502715;362918;65190;302993;81814;406864;25236;25333;140588;81707;294809;94338;306790;294925;114495;29733;24482;25585;499593;298693;303021;24250;3…	Acp5;Adamts12;Alox15;Alpl;Asgr2;Axin2;Bambi;Bmp6;Bmpr1a;Bmpr1b;Casr;Cbs;Cebpa;Clec11a;Clec5a;Clic1;Col11a1;Col1a1;Creb3l1;Cthrc1;Ctnnb1;Ctsk;Dchs1;Ddr2;Dhrs3;Esr1;Fam20c;Fgfr1;Fndc3b;Gabbr1;Gdf10;Gdpd2;Gli3;Gpc3;Grem1;Hdac8;Id2;Id3;Igf1;Igfbp5;Igsf10;Ilk;Inppl1;Isg15;Jund;Kremen1;Limd1;Lrrc17;Map2k6;Mapk3;Mgp;Mmp14;Mtss1;Myoc;Nab1;Notch1;Osr1;P2rx7;Pex7;Plxnb1;Ptn;Rack1;Rassf2;Rest;Rhoa;Ror2;Rpl3…
GO:0050727	regulation of inflammatory response	http://amigo.geneontology.org/amigo/term/GO:0050727	-0.375881	-1.81108	0	0.00919285	197	./Project_wg_result1777002351_GSEA/GO_0050727.png	63	84022;25126;29337;316842;362619;25423;29473;56646;25369;301227;58923;59086;287719;301059;29260;117287;315599;81743;116640;24252;289753;25732;24890;252917;25631;287362;25338;24539;25728;25528;81814;29143;83730;294809;24660;310663;24404;362434;24482;171104;289237;24179;298947;81515;24786;25625;29528;303090;116689;54410;81859;310553;25153;24165;24232;29254;24918;25441;312679;767613;81639;171112;50672	Acp5;Ada;Adamts12;Adora2a;Agt;Alox15;Aoc3;Apoe;C3;Cebpa;Ctsc;Ednrb;Enpp3;Esr1;Fcer1g;Ghsr;Gper1;Gpr17;Gpx1;Grn;Ifi35;Igf1;Il17ra;Irgm;Lgals1;Lpcat3;Lpl;Lyn;Mas1;Mefv;Metrnl;Mgll;Myd88;Ninj1;Nlrp3;Nlrx1;Nr1d1;Park7;Pde2a;Pik3cg;Plcg2;Pmp22;Ptpn6;Rhbdd3;Sharpin;Sirpa;Slamf8;Smad3;Smpdl3b;Sod1;Stat5a;Stat5b;Tgfb1;Tlr2;Tlr4;Tmsb4x;Tnc;Tnfaip8l2;Tnfrsf1a;Trem2;Vamp3;Vamp8;Wfdc1
GO:0036119	response to platelet-derived growth factor	http://amigo.geneontology.org/amigo/term/GO:0036119	-0.533442	-1.81166	0.0039604	0.00934699	28	./Project_wg_result1777002351_GSEA/GO_0036119.png	13	315655;171569;24941;29474;25150;29260;29302;66018;59107;301737;367166;297893;24924	Atp7a;Coro1b;Fer;Fyn;Hdac1;Hyal1;Itgb3;Ltbp1;Pdgfd;Ptn;Rdx;Spon2;Tlr4
GO:0042445	hormone metabolic process	http://amigo.geneontology.org/amigo/term/GO:0042445	-0.395996	-1.81629	0	0.00905457	131	./Project_wg_result1777002351_GSEA/GO_0042445.png	45	25126;25703;191574;24483;25426;289456;25644;84426;25507;361802;25267;685325;171522;25322;83618;24890;361315;25056;312495;246075;24188;79244;25702;266686;25700;58952;25235;24482;24179;29189;29175;25506;64191;171548;24718;29441;116676;313564;114861;25697;362757;63864;24211;84013;50672	Agt;Akr1c14;Aldh1a1;Aldh1a2;Atp1a1;Bmp6;Cpq;Ctsk;Ctsl;Cyp1b1;Cyp26b1;Cyp2d4;Ddo;Dhcr7;Dhrs4;Dkk3;Ednrb;Esr1;Fdx1;Ghr;Hsd17b1;Hsd17b10;Hsd17b11;Hsd17b12;Hsd17b4;Hsd17b8;Ide;Igf1;Igf2;P4hb;Pcsk6;Pdgfra;Pnlip;Por;Prlhr;Rbp1;Rbp4;Rdh11;Reln;Rest;Scpep1;Stat5b;Wnt4;Yipf5;Zmpste24
GO:0042330	taxis	http://amigo.geneontology.org/amigo/term/GO:0042330	-0.364543	-1.81725	0	0.00915783	240	./Project_wg_result1777002351_GSEA/GO_0042330.png	91	299236;81517;25589;85421;171355;81686;299858;287931;25433;308875;498951;498185;113959;116996;445269;497942;63865;24553;58949;114099;25246;301227;50566;25496;29474;59086;57302;25267;315196;155151;170538;24338;171056;25599;84348;363142;116477;60628;100363275;140585;25155;246331;309684;595134;50689;84007;24615;292401;25631;29302;57341;303311;66018;25338;81756;301265;81814;50594;366126;301737;81527;3…	Ackr3;Adam17;Adgra2;Aif1;Akirin1;Akt2;Bcar1;Bsg;C3;C3ar1;C5ar1;C5ar2;Calr;Casr;Cd74;Cklf;Cnr2;Coro1a;Coro1b;Csf3r;Cx3cr1;Cxcl16;Cxcr4;Cyp7b1;Cysltr1;Edn3;Ednrb;Ephb1;Fcer1g;Fer;Fgfr1;Flrt2;Grem1;Hbegf;Il16;Il17ra;Il34;Itgb2;Itgb3;Kdr;Lgmn;Lgr6;Lrp1;Lyn;Mapk3;Mdk;Met;Mmp2;Nbl1;Ninj1;Notch1;Nrp1;Nrp2;Padi2;Parva;Pdgfd;Pdgfra;Pla2g7;Pou4f2;Ppib;Ppm1f;Prex1;Prkcd;Prkd1;Ptafr;Ptn;Ptpro;Rab13;Rhoa;Rhog…
GO:0044403	biological process involved in symbiotic interaction	http://amigo.geneontology.org/amigo/term/GO:0044403	-0.411542	-1.81826	0	0.00923766	103	./Project_wg_result1777002351_GSEA/GO_0044403.png	39	56646;308901;301059;287818;296083;63868;84589;679787;171056;25599;29271;114709;83618;688785;171164;282834;361916;684097;309586;29302;64465;25728;29448;362237;83730;83462;24404;25104;24932;297995;50567;25506;301252;25697;64367;308417;114489;29502;246215	Apoe;Cd300lf;Cd4;Cd74;Cdc42;Cfl1;Chmp3;Chmp4c;Chmp5;Clec5a;Ctsl;Cx3cr1;Dag1;Dynlt1;Gbp2;Gpx1;Hsp90ab1;Hspd1;Ifitm2;Itgb3;Lgals1;Myd88;Nectin2;P4hb;Pc;Ppib;Rab7a;Rab9a;Rest;Slc20a2;Slc3a2;Snx3;Tbc1d20;Tpcn1;Trim21;Trim26;Trim8;Vamp8;Vps18
GO:0032602	chemokine production	http://amigo.geneontology.org/amigo/term/GO:0032602	-0.460394	-1.81911	0	0.00934921	54	./Project_wg_result1777002351_GSEA/GO_0032602.png	23	25554;364594;301227;58923;59086;317468;301059;29260;311430;54287;25599;192281;364867;25155;24539;25528;25239;310553;29427;85489;297893;57027;312679	Adam17;Aif1;Apod;Cd74;Eif2ak2;Hdac1;Il17ra;Lpl;Mavs;Mefv;Myd88;Oas1a;Sirpa;Snai2;Syk;Tgfb1;Ticam2;Tlr2;Tlr3;Tlr4;Tlr7;Trem2;Twist1
GO:0071706	tumor necrosis factor superfamily cytokine production	http://amigo.geneontology.org/amigo/term/GO:0071706	-0.411583	-1.82678	0	0.00882878	107	./Project_wg_result1777002351_GSEA/GO_0071706.png	47	361794;363938;24699;24230;445269;84022;287722;171569;291171;29337;364594;58949;317578;301227;59086;314949;60350;301059;29260;63868;499801;311430;295338;117287;171056;192281;690492;25732;25155;84577;316327;309172;24539;25528;289014;304966;24482;25625;361537;79129;116689;24854;314870;310553;85489;297893;25441	Acp5;Arid5a;C5ar2;Cd14;Cd33;Clu;Cx3cr1;Cyba;Fcer1g;Fcgr3a;Frmd8;Ghsr;Hdac1;Hdac2;Hspd1;Ifih1;Igf1;Irak3;Lpl;Mapkapk2;Mavs;Myd88;Nfkbil1;Oas1a;Oas2;Park7;Plcg2;Ptafr;Ptpn22;Ptpn6;Ptprc;Rad21;Sash3;Sirpa;Spon2;Syk;Tgfb1;Tlr2;Tlr3;Tlr4;Tmem106a;Tnfrsf1a;Trem2;Trim27;Tspo;Twist1;Tyrobp
GO:0002532	production of molecular mediator involved in inflammatory response	http://amigo.geneontology.org/amigo/term/GO:0002532	-0.461763	-1.82785	0	0.00890662	56	./Project_wg_result1777002351_GSEA/GO_0002532.png	24	364594;301227;58923;301059;29260;65030;364867;25155;362050;29338;25752;310644;25528;29143;83730;289237;81515;29528;25239;363516;57027;25441;312679;362792	Abcd1;Adam17;Apod;Cd6;Ephx2;Fcer1g;Gbp5;Grn;Il17ra;Lyn;Mefv;Myd88;Pbxip1;Pld4;Prdx2;Sirpa;Slamf8;Syk;Ticam2;Tlr3;Tlr4;Trem2;Vamp3;Vamp8
GO:0006690	icosanoid metabolic process	http://amigo.geneontology.org/amigo/term/GO:0006690	-0.459817	-1.83032	0	0.00874589	59	./Project_wg_result1777002351_GSEA/GO_0006690.png	28	266684;25315;299732;24267;170897;191574;25426;29260;24886;25599;171522;25155;50689;311865;362809;140868;24404;24423;25625;310553;299194;29254;50681;54320;192227;84575;81639;313375	Acox1;Akr1c14;Alox15;Cd74;Comt;Cyp1b1;Cyp2d1;Cyp2d4;Cyp2j3;Ephx1;Fabp5;Fads1;Gpx1;Gstm1;Lta4h;Mapk3;Mgll;Pdpn;Ptges2;Ptges3;Ptgr1;Ptgr2;Sphk1;Syk;Tbxas1;Tlr2;Tlr4;Tnfrsf1a
GO:0030101	natural killer cell activation	http://amigo.geneontology.org/amigo/term/GO:0030101	-0.498179	-1.85475	0	0.00702937	43	./Project_wg_result1777002351_GSEA/GO_0030101.png	22	50645;245983;25232;302811;304947;24699;25126;690369;25670;680476;94342;155151;295338;289753;364867;25328;25587;304966;361537;360468;24918;117254	Bag6;Bloc1s3;Coro1a;Elf4;Emp2;Fcgr3a;Id2;Il11ra1;Il15;Il15ra;Lamp1;Pbx1;Prdx1;Ptpn22;Ptprc;Rab27a;Rhbdd3;Stat5a;Stat5b;Ticam2;Tyro3;Tyrobp
GO:0061448	connective tissue development	http://amigo.geneontology.org/amigo/term/GO:0061448	-0.380105	-1.8552	0	0.00710162	197	./Project_wg_result1777002351_GSEA/GO_0061448.png	91	81517;305081;171355;85272;289754;295106;65138;294337;58968;29375;308390;691657;298894;171356;25492;252833;84032;24941;287380;25554;25644;363294;50566;362339;25496;29227;59086;298878;81810;315196;29393;25591;81507;29134;313997;306782;116510;140586;25654;300652;314694;266813;25322;155012;50689;310914;65984;316327;84007;59328;25631;29302;295691;83470;66018;25587;24539;310644;302993;24706;25181;30884…	Aacs;Acan;Adamts12;Adrm1;Arid5a;Atp7a;Axin2;Bgn;Bmp1;Bmp6;Bmp7;Bmpr1a;Bmpr1b;C3ar1;Casr;Cbs;Cd34;Cfh;Chadl;Chst11;Col11a1;Col1a1;Col3a1;Col6a1;Creb3l2;Crip1;Ctnnb1;Ctsk;Ddrgk1;Dhrs7b;Fgfr1;Fkrp;Foxc2;Frzb;Gdf7;Ghr;Gli3;Grem1;Hmgcs2;Hsd17b1;Hyal1;Id2;Ift80;Igf1;Itgb3;Lpl;Lum;Maf;Mapk3;Mboat2;Mdk;Mgp;Mycn;Nfia;Nfib;Notch1;Osr1;Oxct1;Parp1;Pbxip1;Pdgfd;Por;Pou4f2;Prrx1;Rarb;Ror2;Serpinh1;Sh3pxd2b;Sm…
GO:0050878	regulation of body fluid levels	http://amigo.geneontology.org/amigo/term/GO:0050878	-0.382186	-1.85592	0	0.00714492	185	./Project_wg_result1777002351_GSEA/GO_0050878.png	64	56611;24941;24553;290843;303634;25369;309004;364183;25265;25267;680476;29260;170538;24318;311210;25059;25083;116477;25155;25117;155012;29338;84492;310392;364206;29302;316014;308598;312728;25728;25748;58851;83730;364674;83518;295703;116598;81779;81515;64467;689710;29528;79129;116689;50677;24165;25673;292072;81664;360468;64205;29468;302499;24918;29366;25441;54320;300768;286906;24936;25293;64203;589…	Ada;Adora2a;Adra2a;Alas2;Anxa2;Anxa5;Aplnr;Apoe;Aprt;Aqp4;Atp7a;Bcat2;Bloc1s3;Bloc1s4;C1galt1c1;Ccnd1;Cd9;Cfh;Coro2b;Cyba;Drd2;Ednrb;Emp2;Entpd2;Fcer1g;Gna13;Gnai2;Gpat4;Heg1;Hk2;Hps5;Hsd11b2;Itgb3;Lyn;Met;Nbeal2;Nr1h2;P2ry1;Pdgfra;Pdia3;Pdia4;Pdia6;Pdpn;Plek;Prdx2;Prkcd;Ptpn6;Ptpro;Rplp0;Sctr;Serpine2;Serping1;Slc7a11;Stat5a;Syk;Tec;Tifab;Tlr4;Tspan18;Tspan9;Vamp3;Vamp8;Vkorc1;Wnk1
GO:0034109	homotypic cell-cell adhesion	http://amigo.geneontology.org/amigo/term/GO:0034109	-0.492292	-1.864	0	0.00632488	47	./Project_wg_result1777002351_GSEA/GO_0034109.png	22	56646;364183;25267;170538;25155;155012;310392;364206;29302;291445;312728;24586;680717;116598;81515;116689;81679;29468;29366;54320;286906;24936	Bloc1s4;Cd9;Cfh;Itgb3;Jup;Lgals1;Lyn;Megf10;Ncam1;Pdgfra;Pdia3;Pdia4;Pdia6;Pdpn;Plek;Prkcd;Ptpn6;Serpine2;Slc7a11;Syk;Tspan9;Zfp703
GO:0006081	cellular aldehyde metabolic process	http://amigo.geneontology.org/amigo/term/GO:0006081	-0.489224	-1.86502	0	0.00631635	46	./Project_wg_result1777002351_GSEA/GO_0006081.png	22	353252;367252;361730;79128;24479;25703;25426;25644;84426;117287;83618;361596;266686;64040;309147;171548;116676;29539;362757;25586;64524;50672	Aldh1a2;Aldh2;Aldh3b1;Aldh9a1;Alpl;Bmp6;Cyp1b1;Dab2;Dhrs4;Dkk3;Ednrb;Idh1;Idh2;Mgat4a;Park7;Rbp4;Rdh10;Rdh11;Rest;Tkfc;Tkt;Wnt4
GO:0007272	ensheathment of neurons	http://amigo.geneontology.org/amigo/term/GO:0007272	-0.403307	-1.87529	0	0.00606208	136	./Project_wg_result1777002351_GSEA/GO_0007272.png	49	25423;25613;84470;59086;360839;50555;83501;362567;60628;58960;81523;50689;64824;291445;25742;24706;24660;64364;83526;24482;308666;81918;289231;309855;24786;24854;300095;25524;117258;170922;300757;310553;363516;619374;24825;288710;83792;361549;25233;84353;362211;24936;58970;114489;29718;294673;24596;24924;170907	Abcd1;Akt2;Atrn;Cd9;Cdh2;Clu;Cntn1;Ctnnb1;Ctsc;Cxcr4;Cyfip1;Dag1;Degs1;Fig4;Gnpat;Hexa;Hexb;Igf1;Ilk;Jam2;Kcnj10;Lgi4;Mall;Map2k2;Mapk3;Megf10;Myoc;Nab1;Ncstn;Ngfr;Pard3;Pllp;Pmp22;Pomgnt1;Psap;Ptn;Ptprz1;Rarb;Rnf10;S100b;Scd2;Serinc5;Sod1;Srebf2;Tf;Tgfb1;Tlr2;Tmem163;Ugt8
GO:0055123	digestive system development	http://amigo.geneontology.org/amigo/term/GO:0055123	-0.431499	-1.88456	0	0.00557813	95	./Project_wg_result1777002351_GSEA/GO_0055123.png	32	84032;24483;25640;83502;81917;25496;59086;366214;25267;81810;246060;362065;140586;64186;25631;25587;24188;24706;140588;24482;305552;24450;24165;299116;24718;116676;308912;84353;25717;81809;25273;50672	Ada;Aldh1a1;Aldh1a2;Ascl1;Cdh1;Cdkn1c;Col3a1;Ctnnb1;Dchs1;Ednrb;Gli3;Hip1r;Hmgcs2;Hnf1b;Id2;Igf1;Igf2;Nkx2-2;Notch1;Pdgfra;Rarb;Reln;Sav1;Smad3;Smo;Sox9;Tgfb1;Tgfb2;Tgfb3;Tgfbr2;Wdpcp;Wls
GO:0006790	sulfur compound metabolic process	http://amigo.geneontology.org/amigo/term/GO:0006790	-0.390122	-1.88467	0	0.00573308	188	./Project_wg_result1777002351_GSEA/GO_0006790.png	56	500694;298934;306197;303218;171347;81640;81726;25256;315939;314694;29637;303923;313610;302302;24962;305177;100359982;310392;50671;680668;362013;117243;79244;306262;100363074;60356;58835;81805;316533;314304;25235;289175;367166;24423;84468;24250;296925;24450;300757;29633;50559;363516;64300;25045;24918;25227;84353;361637;192172;360975;294673;171400;170465;307859;25274;50672	Aass;Abcd1;Acaa2;Acot1;Acot11;Acot3;Acsl6;Acsm5;Adi1;Ahcyl1;Amd1;Arsb;B4galt4;Btd;Cbs;Chpf;Chst11;Chst3;Chst5;Chst7;Csad;Cth;Ctnnb1;Dbi;Ednrb;Elovl5;Enoph1;Extl1;Fasn;Fmo1;Ghr;Gstm1;Hexa;Hexb;Hmgcs1;Hmgcs2;Hs3st3b1;Hsd17b4;Hyal1;Isca2;Mat2a;Mpc2;Mpst;Mthfd1;Mvd;Ndst1;Ogdh;Phgdh;Pxylp1;Slc19a2;Slc7a11;Stat5a;Suox;Tm9sf2;Tpk1;Tst
GO:0034113	heterotypic cell-cell adhesion	http://amigo.geneontology.org/amigo/term/GO:0034113	-0.545647	-1.88805	0.0019685	0.00563057	32	./Project_wg_result1777002351_GSEA/GO_0034113.png	11	369016;116477;309684;29302;57341;25338;25528;315675;25361;81679;81639	Alox15;Gldn;Itgb2;Itgb3;Jup;Myadm;Ninj1;Parva;Sirpa;Vcam1;Wnk1
GO:0035272	exocrine system development	http://amigo.geneontology.org/amigo/term/GO:0035272	-0.508393	-1.89367	0	0.0055612	43	./Project_wg_result1777002351_GSEA/GO_0035272.png	23	25022;85272;289754;24483;24553;25554;299737;83502;363294;29227;56083;59086;362065;140586;246331;311163;64465;24482;25307;79114;25717;114489;81809	Bmp7;Cdc42;Cdh1;Cst3;Ctnnd1;Dag1;Fgfr1;Fgfr2;Igf1;Igf2;Met;Nfib;Nrp1;Ntn4;Snai2;Sox9;Tgfb1;Tgfb2;Tgfb3;Tgm2;Twsg1;Wls;Xbp1
GO:0032637	interleukin-8 production	http://amigo.geneontology.org/amigo/term/GO:0032637	-0.520106	-1.91101	0	0.00488237	39	./Project_wg_result1777002351_GSEA/GO_0032637.png	19	24699;445269;364594;317468;684440;60350;301059;29260;311430;295338;117287;25599;690492;25155;81754;295357;292130;310553;89824	Afap1l2;C5ar2;Cd14;Cd33;Cd74;Chi3l1;Lamtor5;Mavs;Myd88;Park7;Ptpn22;Ptprc;Rab1a;Syk;Tlr2;Tlr3;Tlr4;Tlr7;Tlr8
GO:0009620	response to fungus	http://amigo.geneontology.org/amigo/term/GO:0009620	-0.610955	-1.91221	0	0.00499333	22	./Project_wg_result1777002351_GSEA/GO_0009620.png	14	297520;64317;171569;29337;59086;301059;171056;25155;361422;362430;366126;502872;310553;312679	Clec4a1;Cotl1;Cx3cr1;Gpx3;Il17ra;Il17rc;Jagn1;Myd88;Plcg2;Spi1;Spon2;Syk;Tgfb1;Tlr2
GO:0070542	response to fatty acid	http://amigo.geneontology.org/amigo/term/GO:0070542	-0.469307	-1.91493	0	0.0050685	65	./Project_wg_result1777002351_GSEA/GO_0070542.png	29	170816;64639;25374;94201;78968;58949;84470;29260;83791;24886;140586;84482;65984;24451;24539;25748;25502;25585;83782;24450;310553;24718;29539;83792;246074;25757;24248;54315;25413	Aacs;Alad;Alas2;Aldh2;Bad;Cat;Cdk4;Cpt1a;Cpt2;Fdps;Foxo1;Gnpat;Hmgcs2;Hmox1;Id3;Lpl;Nme2;Oaz1;Olr59;Ptafr;Reln;Scd;Scd2;Sox9;Srebf1;Tbxas1;Tlr2;Tlr4;Ucp2
GO:0060541	respiratory system development	http://amigo.geneontology.org/amigo/term/GO:0060541	-0.394937	-1.91853	0	0.00510429	185	./Project_wg_result1777002351_GSEA/GO_0060541.png	67	78968;116557;25703;84032;56611;24941;287707;25496;29227;59086;362361;308577;25267;81810;315196;94342;83508;24668;498769;81507;293103;140586;58960;116640;24252;50689;310392;29459;64186;64465;362809;494125;25236;25333;140588;81707;312478;94338;294925;24482;499593;305552;689710;24450;81716;79114;64191;24165;299116;116676;24883;25425;288583;54320;25697;84353;171160;25717;89824;252929;114489;81809;252…	Ada;Aldh1a2;Anxa2;Ascl1;Atp7a;Bag6;Bmpr1a;Cdc42;Cebpa;Chi3l1;Col3a1;Ctnnb1;Ctsh;Ctsl;Ctsz;Dag1;Dhcr7;Edaradd;Epas1;Fgfr1;Fgfrl1;Fndc3b;Foxj1;Fuz;Ggcx;Gli3;Gpc3;Heg1;Hikeshi;Hmgcs2;Hnrnpa2b1;Hopx;Igf1;Igfbp5;Loxl3;Map2k2;Mapk3;Mgp;Mmp14;Nfib;Nkiras2;Notch1;Pdgfra;Pdpn;Plod3;Ppp1ca;Ptges3;Ptn;Rbbp9;Rbp4;Rcn3;Sav1;Slc7a11;Smpd3;Sox2;Sox9;Srebf1;Tgfb1;Tgfb2;Tgfb3;Tgfbr2;Timeless;Tmbim6;Tnc;Wdpcp;Wnt7…
GO:0001501	skeletal system development	http://amigo.geneontology.org/amigo/term/GO:0001501	-0.373907	-1.91941	0	0.0052803	314	./Project_wg_result1777002351_GSEA/GO_0001501.png	118	24699;117278;171356;497987;311130;287612;680415;25492;25703;84032;56611;24941;689284;25554;25644;363294;50566;362339;29227;56083;59086;298878;309004;308577;25267;81810;315196;29393;81507;293024;81765;29134;313997;29665;306782;691750;246060;116510;140586;25654;25732;140585;314694;685781;81523;266813;25322;155012;50689;313387;310914;316327;83727;64824;59328;25631;308718;312495;295691;83470;502715;2…	Acp5;Adamts12;Akap13;Alpl;Anxa2;Arid5a;Atp7a;Axin2;Bcan;Bgn;Bmp1;Bmp6;Bmpr1a;Bmpr1b;Cbs;Cdkn1c;Cfh;Chadl;Chst11;Col11a1;Col1a1;Col3a1;Creb3l2;Ctc1;Ctnnb1;Ctsk;Cyp26b1;Dchs1;Ddr2;Ddrgk1;Dhrs3;Ebp;Fam20c;Fbn1;Fgfr1;Fgfrl1;Foxc2;Frzb;Fuz;Gdf11;Ghr;Gli3;Grem1;Hexa;Hexb;Hoxb4;Hoxb5;Hsd17b1;Hyal1;Igf1;Inppl1;Lrrc17;Lum;Maf;Map2k6;Mapk3;Mboat2;Mdfi;Mgp;Mks1;Mmp14;Myoc;Nab1;Ndst1;Nfia;Nfib;Ninj1;Osr1;P2r…
GO:0002440	production of molecular mediator of immune response	http://amigo.geneontology.org/amigo/term/GO:0002440	-0.428885	-1.92401	0	0.00518355	119	./Project_wg_result1777002351_GSEA/GO_0002440.png	56	24747;156767;246774;362491;289754;303687;311580;303281;289757;313702;65161;311786;24699;171569;25703;29337;364594;315435;317578;59086;317468;500251;301059;29260;63868;311430;295338;300985;315599;25599;29665;246280;304577;29185;364867;25732;25155;316327;287362;24451;65190;378947;289014;252963;24223;29528;314870;296320;310553;85489;25441;25717;81809;89783;362364;24822	Acp5;Arid5a;B2m;Bst2;Cd37;Cd74;Ctnnbl1;Evpl;Fcer1g;Gimap5;Hmces;Hmox1;Hspd1;Il13ra1;Irak3;Laptm5;Litaf;Mad2l2;Mapkapk2;Mavs;Myd88;Nlrp3;Nlrx1;P2rx7;Panx1;Parp3;Plcg2;Polm;Ptpn22;Ptprc;RT1-M3-1;Rbp4;Ripk2;Rsad2;Samhd1;Sash3;Slc15a4;Spon2;Supt6h;Syk;Tgfb1;Tgfb2;Tgfb3;Ticam2;Tlr2;Tlr3;Tlr4;Tlr7;Tmbim6;Tnfrsf1b;Traf2;Tril;Twist1;Ung;Vamp3;Xbp1
GO:0043062	extracellular structure organization	http://amigo.geneontology.org/amigo/term/GO:0043062	-0.403	-1.92782	0	0.00512895	169	./Project_wg_result1777002351_GSEA/GO_0043062.png	80	360627;25614;298941;299236;29158;81686;294337;292734;58968;313702;114501;89806;308390;171356;297339;84032;56611;25426;24941;292770;299737;50566;25496;84430;85274;59086;300474;117036;25267;64387;362567;317470;29393;315714;29134;362393;25473;140586;25654;685781;84491;364405;64475;292401;25631;29302;363457;683788;305494;310644;117183;25484;81707;294809;100910434;312478;24660;94338;293997;304608;1025…	Acan;Adamts12;Adamts13;Adamts15;Aebp1;Agt;Antxr1;Anxa2;Atp7a;Axin2;Capg;Ccdc80;Chadl;Col11a1;Col1a1;Col3a1;Col4a5;Col6a1;Colgalt1;Creb3l1;Cst3;Cyp1b1;Dag1;Ddr2;Egfl6;Fbln5;Fkbp10;Fkrp;Flrt2;Foxc2;Fscn1;Gfap;Grem1;Hsd17b12;Itgb3;Kazald1;Lamb1;Lamb2;Lamc1;Lmx1b;Loxl1;Loxl3;Ltbp4;Mad2l2;Meltf;Mmp14;Mmp15;Mmp19;Mmp2;Myo1e;Notch1;Ntn4;Olfml2b;P4ha1;Pbxip1;Pdgfra;Pdpn;Plod3;Pmp22;Pomgnt1;Pomt1;Prdx4;Pt…
GO:0045229	external encapsulating structure organization	http://amigo.geneontology.org/amigo/term/GO:0045229	-0.403	-1.92782	0	0.00512895	169	./Project_wg_result1777002351_GSEA/GO_0045229.png	80	360627;25614;298941;299236;29158;81686;294337;292734;58968;313702;114501;89806;308390;171356;297339;84032;56611;25426;24941;292770;299737;50566;25496;84430;85274;59086;300474;117036;25267;64387;362567;317470;29393;315714;29134;362393;25473;140586;25654;685781;84491;364405;64475;292401;25631;29302;363457;683788;305494;310644;117183;25484;81707;294809;100910434;312478;24660;94338;293997;304608;1025…	Acan;Adamts12;Adamts13;Adamts15;Aebp1;Agt;Antxr1;Anxa2;Atp7a;Axin2;Capg;Ccdc80;Chadl;Col11a1;Col1a1;Col3a1;Col4a5;Col6a1;Colgalt1;Creb3l1;Cst3;Cyp1b1;Dag1;Ddr2;Egfl6;Fbln5;Fkbp10;Fkrp;Flrt2;Foxc2;Fscn1;Gfap;Grem1;Hsd17b12;Itgb3;Kazald1;Lamb1;Lamb2;Lamc1;Lmx1b;Loxl1;Loxl3;Ltbp4;Mad2l2;Meltf;Mmp14;Mmp15;Mmp19;Mmp2;Myo1e;Notch1;Ntn4;Olfml2b;P4ha1;Pbxip1;Pdgfra;Pdpn;Plod3;Pmp22;Pomgnt1;Pomt1;Prdx4;Pt…
GO:0050817	coagulation	http://amigo.geneontology.org/amigo/term/GO:0050817	-0.447046	-1.93381	0	0.00511317	85	./Project_wg_result1777002351_GSEA/GO_0050817.png	32	309004;364183;25265;25267;680476;29260;170538;25083;25155;155012;29338;84492;310392;364206;29302;316014;308598;312728;25728;295703;116598;81515;64467;116689;25673;29468;302499;29366;25441;54320;286906;24936	Adra2a;Anxa5;Apoe;Bloc1s3;Bloc1s4;C1galt1c1;Cd9;Cfh;Entpd2;Fcer1g;Hps5;Itgb3;Lyn;Nbeal2;P2ry1;Pdgfra;Pdia3;Pdia4;Pdia6;Pdpn;Plek;Prdx2;Prkcd;Ptpn6;Serpine2;Serping1;Slc7a11;Syk;Tec;Tlr4;Tspan9;Vkorc1
GO:0044283	small molecule biosynthetic process	http://amigo.geneontology.org/amigo/term/GO:0044283	-0.373165	-1.95169	0	0.00410563	360	./Project_wg_result1777002351_GSEA/GO_0044283.png	125	117278;29580;362843;25035;498728;79122;78968;25703;64461;29337;24424;64192;25554;58949;25644;24788;84426;85239;171047;54260;79111;361802;25265;83791;24886;117287;298934;24312;25368;25599;89784;25270;294119;81726;309262;25256;29637;25155;364064;191576;25322;313706;83618;24962;100360180;305177;84482;252917;303565;364206;25056;50671;24188;680668;301024;24539;311865;25728;362809;140910;60356;58851;58…	Aass;Abat;Abcd1;Abcd3;Abhd1;Acadl;Acadm;Acadvl;Acsbg1;Acsf3;Acsm5;Ada;Adi1;Adk;Agt;Ak1;Aldh1a1;Aldh1a2;Alox15;Apoe;Aprt;Bcat2;Bmp6;Cbs;Cd74;Coq9;Csad;Cth;Cyb5r3;Cyp51;Cyp7b1;Dctd;Decr2;Degs1;Dhcr7;Dhfr;Dkk3;Dnph1;Ebp;Elovl2;Elovl5;Eno1;Enoph1;Fabp5;Fads1;Fads2;Fasn;Fdft1;Fdps;Fdxr;Fmo1;Foxo1;G6pc3;Gch1;Glud1;Gpd2;Gper1;Gstm1;Gstm2;Hacd4;Hmgcs1;Hmgcs2;Hsd17b1;Hsd17b10;Hsd17b12;Hsd17b8;Idi1;Ilvbl;I…
GO:0008202	steroid metabolic process	http://amigo.geneontology.org/amigo/term/GO:0008202	-0.41227	-1.95222	0	0.00428413	169	./Project_wg_result1777002351_GSEA/GO_0008202.png	71	79128;361338;117278;29580;24230;25035;25126;79122;78968;81782;191574;24483;25426;25554;289456;25644;84426;79111;361802;25267;83791;65030;171522;89784;25270;81726;116510;309262;24252;29637;191576;25117;25322;83618;24890;252917;312495;301024;79244;307897;25728;140910;308843;24660;266686;25287;362434;24482;29189;24786;25541;365345;83839;24450;25427;300095;79114;361054;64191;171548;29441;25045;25429;…	Abcd3;Acadl;Acadvl;Akr1c14;Apoe;Atp1a1;Bmp6;Calb1;Cat;Cebpa;Cyb5r2;Cyb5r3;Cyp1b1;Cyp26b1;Cyp2d4;Cyp51;Cyp7b1;Dab2;Dbi;Dhcr7;Dhrs4;Dkk3;Ebp;Ebpl;Ednrb;Ephx2;Esr1;Fdft1;Fdps;Fdx1;Fdxr;Fech;Fgfr1;Hmgcs1;Hmgcs2;Hsd11b2;Hsd17b1;Hsd17b10;Hsd17b11;Hsd17b12;Hsd17b4;Hsd17b8;Idi1;Igf1;Igf2;Lcat;Lpcat3;Msmo1;Mvd;Nr1d1;Nsdhl;Pdgfra;Pmp22;Por;Rest;Scap;Scp2;Sdr42e1;Slc27a5;Snai2;Soat1;Sod1;Srebf1;Srebf2;Stat5…
GO:1901615	organic hydroxy compound metabolic process	http://amigo.geneontology.org/amigo/term/GO:1901615	-0.380306	-1.95921	0	0.00429729	329	./Project_wg_result1777002351_GSEA/GO_1901615.png	131	24267;170897;497009;299858;359725;310645;353252;116777;691221;81727;308390;24533;361730;79128;361338;117278;29580;29640;25035;24479;79122;78968;81782;25703;191574;29337;25426;24941;64192;25554;58949;25644;24788;84426;114507;54260;79111;361751;25265;83791;117287;24312;65030;24318;25571;317675;171522;83823;89784;25270;294119;365901;81726;309262;24252;29637;60418;25117;24808;25322;83618;252917;31039…	Abat;Abcd3;Acadl;Acadvl;Akr1c14;Akr7a2;Aldh1a1;Aldh1a2;Aldh2;Aldh3b1;Alg14;Alox15;Alpl;Apoe;Atp7a;Bmp6;Calb1;Cat;Cbr4;Cdh3;Cebpa;Comt;Cpq;Ctsk;Ctsl;Cyb5r2;Cyb5r3;Cyp1b1;Cyp26b1;Cyp2d4;Cyp51;Cyp7b1;Dab2;Dao;Ddc;Dhcr7;Dhfr;Dhrs4;Dkk3;Dpm2;Drd2;Ebp;Ebpl;Ednrb;Epas1;Ephx2;Faxdc2;Fdft1;Fdps;Fdx1;Fdxr;Fech;Fgfr1;Fkrp;Gch1;Gde1;Gipc1;Gnat2;Gpd2;Gper1;Hmgcs1;Hmgcs2;Hsd11b2;Hsd17b1;Hsd17b10;Hsd17b4;Idh1;I…
GO:0050900	leukocyte migration	http://amigo.geneontology.org/amigo/term/GO:0050900	-0.404535	-1.96299	0	0.00424829	197	./Project_wg_result1777002351_GSEA/GO_0050900.png	73	113959;116996;445269;25126;497942;116557;63865;29473;58949;25246;301227;50566;59086;301059;57302;81521;155151;295338;171056;289785;25599;306782;116477;360950;246240;25155;309684;595134;50689;84007;308995;29302;287362;66018;64465;25338;25528;301265;50594;366126;81707;502872;94338;301737;29733;245978;289237;81515;25361;25239;50677;310553;24165;298518;314654;360468;29427;117273;619374;25429;57027;64…	Ada;Adam17;Aif1;Akirin1;Aoc3;Apod;Bsg;C3ar1;C5ar1;C5ar2;Calr;Cd74;Cd9;Cdc42;Cklf;Cnr2;Coro1a;Csf3r;Cx3cr1;Cxcl16;Cyp7b1;Edn3;Ednrb;Emp2;Fcer1g;Fer;Foxj1;Grem1;Il16;Il17ra;Itgal;Itgb2;Itgb3;Jagn1;Jam2;Lgmn;Lyn;Mapk3;Mmp14;Msn;Myd88;Myo1f;Myo1g;Nbl1;Ninj1;Nlrp3;Padi2;Pdgfd;Pla2g7;Ppib;Prex1;Ptafr;Ptn;Ptpn22;Ptpro;Rhoa;Ripk3;Ror2;S1pr1;Sirpa;Slamf8;Smpd3;Spi1;Stat5b;Syk;Tgfb1;Tgfb2;Tlr2;Trem2;Vcam1;…
GO:0002252	immune effector process	http://amigo.geneontology.org/amigo/term/GO:0002252	-0.380965	-1.96544	0	0.00439413	304	./Project_wg_result1777002351_GSEA/GO_0002252.png	133	24705;84586;308589;50645;100360982;24747;156767;246774;25464;192262;84477;25145;81517;362491;295279;289754;299858;303687;303281;313702;65161;24468;311786;24699;54249;294228;25126;171569;116557;25703;293624;25109;312705;29337;24483;24941;364594;25423;58949;315435;317578;64023;56646;301227;59086;287719;317468;500251;301059;29260;25097;155151;63868;170538;298566;311430;295338;294269;300985;315599;17…	Acp5;Ada;Anxa3;Arid5a;Atp7a;B2m;Bst2;C1qa;C1qb;C1r;C1rl;C1s;C3;Cd180;Cd1d1;Cd24;Cd37;Cd74;Cfd;Cfh;Clu;Coro1a;Cr1l;Csf3r;Ctsc;Ctsh;Cx3cr1;Dhx58;Emp2;Enpp3;Evpl;Fas;Fcer1g;Fcgr1a;Fcgr3a;Fer;Fgl2;Foxj1;Gab2;Gapt;Gimap5;Grn;Hmces;Hmox1;Hspa8;Hspd1;Icam1;Ifi35;Igf2;Il13ra1;Il7r;Inpp5d;Irak3;Irf7;Itgal;Itgb2;Jagn1;Lamp1;Laptm5;Lat2;Lgals1;Litaf;Loxl3;Lrp1;Lyn;Mad2l2;Mapkapk2;Masp1;Mavs;Mdk;Myd88;Myo1f;…
GO:0030323	respiratory tube development	http://amigo.geneontology.org/amigo/term/GO:0030323	-0.409956	-1.96626	0	0.0046254	168	./Project_wg_result1777002351_GSEA/GO_0030323.png	63	78968;116557;25703;84032;56611;24941;287707;303285;25496;29227;59086;362361;25267;81810;315196;94342;83508;24668;81507;293103;140586;58960;116640;24252;50689;310392;29459;64186;64465;362809;494125;25236;25333;140588;81707;312478;94338;294925;24482;499593;689710;24450;81716;79114;64191;24165;299116;116676;25425;288583;54320;25697;84353;171160;25717;89824;252929;114489;81809;25285;24924;29452;24822	Ada;Aldh1a2;Anxa2;Ascl1;Atp7a;Bag6;Bmpr1a;Cdc42;Cebpa;Chi3l1;Col3a1;Ctnnb1;Ctsh;Ctsl;Ctsz;Dag1;Dhcr7;Epas1;Fgfr1;Fndc3b;Foxj1;Ggcx;Gli3;Gpc3;Heg1;Hikeshi;Hmgcs2;Hnrnpa2b1;Hopx;Igf1;Igfbp5;Loxl3;Map2k2;Mapk3;Mgp;Mmp14;Nfib;Nkiras2;Notch1;Pdgfra;Pdpn;Plod3;Ppp1ca;Ptges3;Ptn;Rbbp9;Rbp4;Rcn3;Sav1;Slc7a11;Smpd3;Sox2;Sox9;Srebf1;Tgfb1;Tgfb2;Tgfb3;Tgfbr2;Timeless;Tmbim6;Tnc;Traf4;Wnt7b
GO:0006909	phagocytosis	http://amigo.geneontology.org/amigo/term/GO:0006909	-0.424111	-1.96846	0	0.00473441	126	./Project_wg_result1777002351_GSEA/GO_0006909.png	62	24705;313785;50645;25232;25614;25734;295279;170897;499672;362931;299858;360665;361985;289707;24468;24699;171569;29337;24553;690369;301227;56083;59086;25670;301059;29260;287818;155151;289785;296279;29665;364867;25277;25155;309684;83427;684097;29302;291445;314543;360571;361289;64465;29448;25528;246324;117264;295347;25291;24786;361537;79129;310553;29427;24232;64202;25441;295629;501854;500246;81639;3…	Adgrb1;Aif1;Alox15;Anxa3;Arhgap25;C3;Calr;Cd300lf;Cd302;Cdc42;Cdc42se1;Colec12;Coro1a;Cyba;Fcer1g;Fcgr1a;Gulp1;Hck;Hspa8;Icam5;Il15;Il15ra;Itgb2;Itgb3;Jmjd6;Lrp1;Lyar;Megf10;Met;Mfge8;Myd88;Myo1g;Ns5atp4;P2rx7;P2ry6;Plcg2;Pld4;Ptk2;Ptprc;Rab27a;Rab31;Rab34;Rab7a;Rab7b;Rack1;Rap1a;Rara;Sirpa;Snx3;Sod1;Sphk1;Spon2;Syk;Tgfb1;Tgm2;Ticam2;Tlr2;Tlr4;Tm9sf4;Trem2;Tyro3;Tyrobp
GO:0034341	response to type II interferon	http://amigo.geneontology.org/amigo/term/GO:0034341	-0.454288	-1.97858	0	0.00462128	86	./Project_wg_result1777002351_GSEA/GO_0034341.png	35	361673;81732;25530;81818;297339;497942;364594;308901;58923;29260;25599;114709;246097;362050;155012;171164;24508;81804;287876;64465;25528;378947;83730;29244;64391;102554393;29726;29528;303090;303653;80843;310553;29427;501854;25293	Actg1;Actr3;Adamts13;Aif1;Aqp4;Bst2;Capg;Cd74;Cdc42;Cdc42ep4;Cfh;Cxcl16;Dapk3;Fas;Gbp2;Gbp5;Gch1;Ifitm2;Ifitm3;Irf1;Irgm;Mefv;Rab12;Rab7b;Sec61a1;Sirpa;Slc22a5;Stxbp2;Tlr2;Tlr3;Tlr4;Trim21;Vamp3;Vamp8;Vim
GO:0051604	protein maturation	http://amigo.geneontology.org/amigo/term/GO:0051604	-0.393555	-1.99783	0	0.00416111	290	./Project_wg_result1777002351_GSEA/GO_0051604.png	114	156117;315591;287069;315447;60327;308390;679462;289315;296156;24468;266759;54312;81800;293148;63865;312705;25424;56611;298066;364529;365571;64023;83502;25507;295217;298282;307133;685823;85274;287199;64456;65028;681996;297994;308577;298784;293566;266758;294864;81641;362526;25617;63868;25591;500694;64667;297123;292788;25599;29665;314312;29648;192235;100362805;81778;64026;65142;287470;306324;300652;…	Adam17;Aebp1;Ahsa1;Anpep;Anxa2;Arl2;Asrgl1;B2m;Bace2;Bag1;Bmp1;C1r;C1rl;C2cd3;Calr;Calr3;Casp12;Casp7;Cct3;Cct4;Cct5;Cd74;Cdh1;Chordc1;Cisd3;Clu;Cpxm1;Cpxm2;Cpz;Cryab;Ctnnd1;Ctse;Ctsh;Ctsl;Ctsz;Dnaja1;Dnajb11;Dnajc25;Eno1;Entpd5;Erp29;Erp44;F13a1;Fkbp4;Fkbp9;Fkrp;Fuz;Gli3;Grn;Hsp90ab1;Hsp90b1;Hspa14;Hspa4;Hspa5;Hspa8;Hspb6;Hspd1;Hsph1;Hyou1;Isca2;Itgb3;Lgmn;Lmf2;Masp1;Meltf;Mmp14;Mvp;Ncstn;Nlrc4;…
GO:0072593	reactive oxygen species metabolic process	http://amigo.geneontology.org/amigo/term/GO:0072593	-0.428501	-2.00121	0	0.00426097	147	./Project_wg_result1777002351_GSEA/GO_0072593.png	66	29158;64371;64317;294337;362931;83529;298894;24230;25309;29337;25426;24941;24553;287444;85274;59086;114507;295923;25150;25643;81810;29260;293130;63868;170538;117287;24312;25059;29665;246240;25732;25155;309684;303875;25632;84482;29338;25420;24440;291084;25352;363854;29244;79120;24404;266686;24314;24179;303021;24786;361537;24250;79129;81664;363516;117273;29539;50681;310378;117254;117038;24248;24596…	Abcd1;Acox1;Acp5;Adgrb1;Agt;Aldh2;Arf4;Atp7a;Cat;Cbs;Col6a1;Cryab;Cyba;Cycs;Cyp1b1;Dhfr;Dhrs4;Eif5a;Elavl1;Fbln5;Foxo1;Fyn;Gch1;Gnai2;Gnai3;Gpx1;Gpx3;Hba-a1;Hbb;Hk2;Hspd1;Itgb2;Met;Mt3;Mycn;Ndufc2;Ndufs3;Ngfr;Nnt;Nqo1;Nqo2;Nrros;P2rx7;Park7;Plcg2;Prdx1;Prdx2;Prdx3;Prdx4;Prdx6;Prex1;Prkcd;Rhoa;Ripk3;Sh3pxd2b;Slc5a3;Sod1;Sod3;Syk;Tgfb1;Tgfbr2;Tlr4;Tspo;Tyrobp;Ucp2;Vdac1
GO:0007229	integrin-mediated signaling pathway	http://amigo.geneontology.org/amigo/term/GO:0007229	-0.521073	-2.02117	0	0.00370933	53	./Project_wg_result1777002351_GSEA/GO_0007229.png	23	499443;116510;25155;246331;309684;432392;84492;364206;308995;29302;64465;312478;29186;313494;298693;361537;83782;170922;25414;360468;25441;307505;24924	Bcar1;Cd63;Cdc42;Ctnna1;Emp2;Fcer1g;Fut8;Ilk;Isg15;Itgal;Itgb2;Itgb3;Lims1;Loxl3;Nme2;Nrp1;Plek;Ptn;Syk;Tec;Timp1;Tln1;Tyrobp
GO:0043171	peptide catabolic process	http://amigo.geneontology.org/amigo/term/GO:0043171	-0.687368	-2.02975	0.00391389	0.0033801	16	./Project_wg_result1777002351_GSEA/GO_0043171.png	8	81641;170751;64517;102554393;25700;58952;83534;25425	Adamts13;Anpep;Cpq;Ctsh;Ide;Thop1;Tpp1;Xpnpep1
GO:0042742	defense response to bacterium	http://amigo.geneontology.org/amigo/term/GO:0042742	-0.460436	-2.03474	0	0.00355081	99	./Project_wg_result1777002351_GSEA/GO_0042742.png	50	24747;25734;85421;362491;295279;362931;303687;297968;113959;171569;85385;363115;100363145;301227;298784;301059;29260;170538;311430;56759;29665;64026;296384;294207;25732;25155;362050;171164;81754;287362;360571;361289;29143;294797;24932;289237;298693;25291;25625;303090;60383;79129;81859;310553;314654;24825;57027;25441;246074;25096	Acp5;Adam17;Adgrb1;Akirin2;Anxa3;C5ar1;Casp7;Cd4;Colec12;Cyba;Evpl;Fcer1g;Fcgr1a;Gbp2;Gbp5;Grn;Hck;Il7r;Irgm;Isg15;Mavs;Myd88;Myo1f;Nlrc4;Nlrp3;P2rx7;Pld1;Ppp1r11;Prkcd;Prkd1;RT1-M3-1;Rab1a;Rab34;Rbck1;Ripk2;Rnase4;Scd;Sharpin;Shc1;Slamf8;Slc9a9;Spon2;Stab1;Syk;Tf;Tlr2;Tlr4;Tnfrsf1a;Trem2;Znfx1
GO:0030258	lipid modification	http://amigo.geneontology.org/amigo/term/GO:0030258	-0.44474	-2.03704	0	0.00375256	129	./Project_wg_result1777002351_GSEA/GO_0030258.png	48	64304;65030;313997;25270;140586;25256;316976;308718;24513;79244;83842;301265;300726;25287;362434;289036;309855;25541;117543;311849;25239;309014;24158;293023;64526;54259;363516;305581;291075;361465;29441;85489;25045;246766;171155;50681;25233;63864;113965;25757;25363;315973;65038;81639;170465;114209;170670;25413	Abcd1;Abcd3;Acaa2;Acad11;Acadl;Acadm;Acads;Acadvl;Acox1;Adipor1;Akt2;Alox15;Apod;Cpt1a;Cpt2;Crat;Crot;Dbi;Decr1;Ech1;Echdc1;Eci2;Ephx2;Etfa;Etfbkmt;Fig4;Fmo1;Ggta1;Hadh;Hadha;Hadhb;Hsd17b10;Hsd17b4;Inpp5d;Inppl1;Ivd;Klhl25;Lpcat3;Mboat2;Pex13;Pex7;Phyh;Pla2g7;Plpp4;Por;Scp2;Sox9;Twist1
GO:0016042	lipid catabolic process	http://amigo.geneontology.org/amigo/term/GO:0016042	-0.42893	-2.07275	0	0.00226364	183	./Project_wg_result1777002351_GSEA/GO_0016042.png	55	308718;312495;24513;79244;83842;24539;25728;29448;301265;316122;94338;246120;300726;25702;25287;305795;81779;315165;298947;687008;294422;24655;25541;117543;311849;361401;25524;24158;64526;300757;363516;305581;291075;361465;85489;25045;29254;171155;50681;25233;140693;63864;113965;313917;25757;25096;25363;294673;690163;315973;170465;114209;170670;25413;94167	Abcd1;Abhd1;Abhd5;Abhd6;Acaa2;Acad11;Acadl;Acadm;Acadvl;Acox1;Akt2;Apoe;Cpt1a;Cpt2;Crat;Crot;Cyp26b1;Dbi;Decr1;Ech1;Echdc1;Eci2;Etfa;Hadh;Hadha;Hadhb;Hexa;Hexb;Hsd17b10;Hsd17b4;Ivd;Lpl;Mgll;Naga;Oxct1;Pcca;Pex13;Pex7;Phyh;Pik3cg;Pla2g15;Pla2g7;Plbd2;Plcd1;Plcd4;Pld1;Pnlip;Prdx6;Psap;Rab7a;Scp2;Sctr;Smpd3;Smpdl3a;Twist1
GO:0071402	cellular response to lipoprotein particle stimulus	http://amigo.geneontology.org/amigo/term/GO:0071402	-0.642694	-2.09433	0	0.00236721	25	./Project_wg_result1777002351_GSEA/GO_0071402.png	15	301227;59086;301059;29260;29637;25155;309684;24539;25728;94338;300095;24247;57027;25441;24936	Adam17;Apoe;Casr;Cd9;Fcer1g;Hmgcs1;Itgb2;Lpl;Myd88;Smpd3;Srebf2;Syk;Tgfb1;Tlr4;Trem2
GO:0055094	response to lipoprotein particle	http://amigo.geneontology.org/amigo/term/GO:0055094	-0.653486	-2.09676	0	0.00266311	23	./Project_wg_result1777002351_GSEA/GO_0055094.png	14	301227;59086;301059;29260;29637;25155;309684;24539;25728;94338;300095;24247;25441;24936	Apoe;Casr;Cd9;Fcer1g;Hmgcs1;Itgb2;Lpl;Myd88;Smpd3;Srebf2;Syk;Tgfb1;Tlr4;Trem2
GO:0032612	interleukin-1 production	http://amigo.geneontology.org/amigo/term/GO:0032612	-0.507518	-2.10244	0	0.00285333	64	./Project_wg_result1777002351_GSEA/GO_0032612.png	31	302811;362491;64044;170897;116996;84022;287722;315435;301227;58923;314949;684440;298784;301059;29260;171056;29665;690492;25732;362050;84577;25631;287362;24539;25528;24482;361537;310553;297893;84599;25293	Acp5;Aqp4;Casp8;Cd33;Cx3cr1;Elf4;Gbp5;Ghsr;Hdac1;Hdac2;Igf1;Il16;Lpl;Mefv;Myd88;Nlrc4;Nlrp3;P2rx7;Panx1;Rad21;Ripk2;Sirpa;Smad3;Sphk1;Tlr2;Tlr4;Tlr8;Tmed10;Tmem106a;Trem2;Tyrobp
GO:0019882	antigen processing and presentation	http://amigo.geneontology.org/amigo/term/GO:0019882	-0.541406	-2.12462	0	0.00155348	55	./Project_wg_result1777002351_GSEA/GO_0019882.png	31	116591;266688;84586;50645;100360982;24747;25464;295279;294228;63865;25109;25424;301227;295338;294269;25599;501095;24968;29614;360571;304966;24967;25700;24223;25524;29468;290644;64202;25441;498582;25697	B2m;Calr;Cd1d1;Cd74;Ctse;Ctsl;Fcer1g;Fcgr1a;Fcgr2a;Fcgr3a;Fgl2;Icam1;Ide;Ifi30;Lgmn;Pdia3;Psap;Psmb8;Psmb9;Psme2;Ptpn22;RT1-Da;RT1-M3-1;RT1-S3;Rab27a;Rab34;Rab8b;Relb;Rftn1;Trem2;Wdfy4
GO:0044282	small molecule catabolic process	http://amigo.geneontology.org/amigo/term/GO:0044282	-0.453207	-2.22611	0	0	222	./Project_wg_result1777002351_GSEA/GO_0044282.png	75	64304;117287;64392;685325;25059;64157;25270;361884;316976;100360180;308718;361274;304078;312495;29711;25383;24513;24188;291084;79244;83842;25728;60356;25062;313843;25502;316033;300726;25287;114123;25027;63938;687008;25541;24250;290277;117543;311849;296925;24158;293504;64526;309147;300757;24165;363516;305581;24399;291075;361465;85489;498962;25045;29539;171155;50681;25227;25233;63864;113965;313917;…	Aass;Abat;Abcd1;Abcd3;Abhd1;Acaa2;Acad11;Acadl;Acadm;Acads;Acadvl;Acox1;Acsf3;Ada;Akt2;Aldh1a1;Aldh1l1;Aldh2;Aldh3b1;Apobec1;Apoe;Arsb;Asrgl1;Bcat2;Bckdhb;Cbr3;Cbs;Cpt1a;Cpt2;Crat;Crot;Cryl1;Csad;Cyp26b1;Dao;Dbi;Ddah1;Ddo;Decr1;Ech1;Echdc1;Eci2;Eno1;Etfa;Etfbkmt;Galm;Glb1;Glud1;Gpd2;Hadh;Hadha;Hadhb;Hexa;Hexb;Hibadh;Hk2;Hsd17b10;Hsd17b4;Ivd;Mccc2;Nqo2;Nudt5;Oaz1;Oxct1;Park7;Pcca;Pex13;Pex7;Pgd;Ph…
GO:0032635	interleukin-6 production	http://amigo.geneontology.org/amigo/term/GO:0032635	-0.518326	-2.23383	0	0	88	./Project_wg_result1777002351_GSEA/GO_0032635.png	52	308589;64680;25145;297520;302811;362491;289754;297968;116996;445269;84022;287722;171569;116557;29337;24553;364594;58949;301227;59086;317468;684440;301059;29260;63868;499801;311430;295338;315599;25599;29665;364867;25155;316327;24539;25528;289014;292130;25625;361537;79129;116689;314870;310553;54259;29427;85489;25441;312679;501854;25293;89783	Afap1l2;Aif1;Akirin2;Aqp4;Arid5a;C5ar2;Cd24;Cd74;Crhr2;Cyba;Elf4;Fcer1g;Foxj1;Ghsr;Hspd1;Ifih1;Il16;Il17ra;Il17rc;Inpp5d;Irak3;Laptm5;Lpl;Mapkapk2;Mavs;Met;Myd88;Nlrx1;P2rx7;Plcg2;Ptafr;Ptpn22;Ptpn6;Rab7b;Ripk2;Sirpa;Sphk2;Spon2;Syk;Tgfb1;Ticam2;Tlr2;Tlr3;Tlr4;Tlr7;Tlr8;Tmem106a;Tnfrsf1a;Trem2;Twist1;Tyrobp;Xbp1
GO:0006631	fatty acid metabolic process	http://amigo.geneontology.org/amigo/term/GO:0006631	-0.442156	-2.24234	0	0	261	./Project_wg_result1777002351_GSEA/GO_0006631.png	88	64304;24886;65030;25599;171522;25270;307170;684538;140586;25256;191576;316976;50689;65984;308718;50671;24513;117243;301024;79244;83842;24539;311865;362809;100363074;58851;113956;140868;362540;316122;619561;24404;300726;25287;314304;25514;289036;24179;24423;687008;25625;25541;290277;117543;311849;361401;24158;293023;64526;50559;299194;363516;305581;24232;291075;361465;29441;85489;498962;25045;2925…	Aacs;Abcd1;Abcd3;Abhd1;Abhd5;Acaa2;Acad11;Acadl;Acadm;Acads;Acadvl;Acbd5;Acot1;Acot11;Acot3;Acox1;Acsbg1;Acsf2;Acsf3;Acsl6;Acsm5;Adipor1;Agt;Akt2;Alox15;C3;Cd74;Cpt1a;Cpt2;Crat;Crot;Cryl1;Cyp2d4;Cyp2j3;Dbi;Decr1;Degs1;Ech1;Echdc1;Echdc3;Eci2;Elovl5;Ephx2;Etfa;Etfbkmt;Fabp5;Fads1;Fads2;Fasn;Fmo1;Gpx1;Gstm1;Hacd4;Hadh;Hadha;Hadhb;Hsd17b10;Hsd17b12;Hsd17b4;Ivd;Klhl25;Lpl;Lypla1;Mapk3;Mgll;Mid1ip1;Nr…
GO:0006575	cellular modified amino acid metabolic process	http://amigo.geneontology.org/amigo/term/GO:0006575	-0.525059	-2.26565	0	0	87	./Project_wg_result1777002351_GSEA/GO_0006575.png	33	117287;64392;24312;313997;308457;25455;83842;60356;29244;25287;362434;114123;58952;64040;293620;29726;24250;311849;29175;361401;24158;24718;29441;64300;288583;25697;25757;291450;24264;290551;170907;85309;25413	Acadl;Acadm;Aldh1l1;Aldh7a1;Aldh9a1;Cbs;Chdh;Ckb;Cpq;Cpt1a;Cpt2;Crat;Crot;Csad;Ctsk;Ctsl;Dhfr;Egln2;Folh1;Gch1;Ggh;Lpcat3;Mboat2;Mthfd1;Park7;Pla2g15;Plod3;Por;Ptdss2;Reln;Sardh;Serinc5;Slc22a5
GO:0001906	cell killing	http://amigo.geneontology.org/amigo/term/GO:0001906	-0.551832	-2.28777	0	0	71	./Project_wg_result1777002351_GSEA/GO_0001906.png	36	24468;24699;294228;25126;25109;24483;25423;59086;301059;155151;294269;171056;29665;246240;25155;362050;155012;171164;25328;81804;54243;25338;366126;294797;304966;361537;24223;116689;301252;360468;24232;24918;25425;117254;308417;81809	B2m;C3;Cd1d1;Cfh;Coro1a;Cr1l;Ctsc;Ctsh;Cx3cr1;Emp2;Fcgr3a;Gbp2;Gbp5;Hsp90ab1;Hspa8;Igf2;Il7r;Lamp1;Myd88;Nectin2;Ninj1;P2rx7;Prdx1;Ptpn6;Ptprc;RT1-Da;RT1-S3;Ripk3;Spi1;Stat5a;Stat5b;Stxbp2;Syk;Tgfb1;Tgfb2;Tyrobp
