# Supplementary material
Source: Research Square preprint supplement (doi:10.21203/rs.3.rs-9685636/v1)
Supplement: Supplementary file 5 [file 88bc6a01dcbdd6ab2ad19a89.xlsx]

## Sheet: enrichment_results_wg_result177
geneSet	description	link	enrichmentScore	normalizedEnrichmentScore	pValue	FDR	size	plotPath	leadingEdgeNum	leadingEdgeId	userId
GO:0043043	peptide biosynthetic process	http://amigo.geneontology.org/amigo/term/GO:0043043	0.492599	2.5713	0	0	413	./Project_wg_result1778042654_GSEA/GO_0043043.png	186	122772;117053;81763;100912032;25498;81767;300079;499782;171361;29288;299872;79449;29257;117017;363232;290641;292964;140654;303831;317163;171061;29258;29282;287444;64307;29284;303746;64298;24383;140661;58856;54318;362631;299938;81729;680747;100362640;81764;140655;245981;304012;81776;298517;361196;681062;293754;298700;64530;291434;293418;124323;287069;28298;299027;686234;100312984;287436;25348;2871…	Aarsd1;Akt1;Atf4;Bdh2;Bzw1;Bzw2;C1qbp;Cdk4;Chchd1;Cnbp;Coa3;Cpeb1;Ddx25;Eef1a1;Eif1a;Eif2ak2;Eif2b1;Eif2b3;Eif2s1;Eif2s3;Eif2s3y;Eif3b;Eif3d;Eif3e;Eif3f;Eif3g;Eif3h;Eif3i;Eif4a1;Eif4a2;Eif4a3;Eif4e;Eif4h;Eif5;Eif5a;Eif5a2;Eif6;Etf1;Farsb;Fastkd2;Fxr1;Gapdh;Gatc;Gclc;Gclm;Ggt1;Ggt7;Habp4;Hagh;Hars2;Hbb;Hbs1l;LOC100364335;Lrpprc;Lrrc47;Magoh;Malsu1;Mcts1;Mettl18;Mettl8;Mgst2;Mrpl12;Mrpl13;Mrpl14;Mr…
GO:0010257	NADH dehydrogenase complex assembly	http://amigo.geneontology.org/amigo/term/GO:0010257	0.725596	2.54911	0	0	33	./Project_wg_result1778042654_GSEA/GO_0010257.png	20	297990;499529;25488;295923;315167;289218;301458;361385;362440;294973;293453;362588;497863;298748;293114;296086;293130;83533;691393;301123	Acad9;Aifm1;Ndufa11;Ndufa5;Ndufa6;Ndufa9;Ndufab1;Ndufaf1;Ndufaf7;Ndufb6;Ndufb7;Ndufc2;Ndufs1;Ndufs2;Ndufs3;Ndufs4;Ndufs5;Oxa1l;Tmem126b;Tmem186
GO:0140053	mitochondrial gene expression	http://amigo.geneontology.org/amigo/term/GO:0140053	0.600493	2.49278	0	0	73	./Project_wg_result1778042654_GSEA/GO_0140053.png	36	303746;304012;363289;63864;293754;686234;360977;300852;287126;301463;299857;113958;301552;361805;289307;498000;289143;315550;64360;499191;301240;313867;297082;29681;297727;502633;361005;684274;65248;360796;360992;312616;307806;360821;83474;361883	C1qbp;Chchd1;Coa3;Fastkd2;Gatc;Hsd17b10;Lrpprc;Malsu1;Mettl8;Mrpl12;Mrpl16;Mrpl2;Mrpl23;Mrpl44;Mrps14;Mrps27;Mrps34;Mrps35;Mrps7;Mterf4;Mtif3;Mto1;Mtrf1;Ngrn;Pnpt1;Prkaa1;Rcc1l;Rpusd4;Shmt2;Tbrg4;Tfam;Tfb2m;Thap11;Trmt10c;Trnt1;Uqcc2
GO:0006091	generation of precursor metabolites and energy	http://amigo.geneontology.org/amigo/term/GO:0006091	0.484706	2.43979	0	0	275	./Project_wg_result1778042654_GSEA/GO_0006091.png	114	361071;54322;685322;303393;81728;366448;29507;297990;24479;499529;24368;25488;295923;84480;363061;291103;289950;24383;25282;301011;362897;24669;289218;29445;298596;79250;24644;289217;24787;100145871;282819;100188937;301458;24551;298942;81675;294362;171335;117287;361385;288740;25309;287069;94194;192361;25659;157074;24642;293655;24158;296086;288785;299857;300726;498909;361805;293130;497902;114096;1…	Acadm;Acat1;Acat2;Aco2;Adh5;Aldoa;Arl2;Bdnf;Bloc1s1;Bnip3;Ccnb1;Chchd4;Ciapin1;Cisd1;Coq10b;Coq9;Cox4i1;Cox4i2;Cox5b;Cox6a1;Cox6c;Cox7a2;Cox7b;Cox7c;Cox8a;Cycs;Dgat1;Dlat;Dld;Dnajc15;Dnajc30;Eif6;Esrrb;Etfa;Fh;Flcn;G6pd;Gadd45gip1;Galt;Gapdh;Git1;Gsk3a;Gyg1;Hif1a;Hsd11b1;Idh1;Idh3a;Iscu;Khk;Lyrm7;Mdh1;Mdh2;Mrap2;Mtfr1l;Ndufa5;Ndufaf1;Ndufb6;Ndufb7;Ndufc2;Ndufs1;Ndufs2;Ndufs3;Ndufs4;Ndufv1;Ndufv2;…
GO:0070585	protein localization to mitochondrion	http://amigo.geneontology.org/amigo/term/GO:0070585	0.598284	2.40121	0	0	66	./Project_wg_result1778042654_GSEA/GO_0070585.png	40	288584;64198;363289;81757;266601;24242;290652;300075;297994;65028;64464;282827;290370;679907;83533;114114;312559;691393;29635;79463;84383;54312;252928;79563;50686;54311;300111;171139;685620;24230;50658;65248;63868;304017;25578;24185;308416;311621;307210;266759	Aifm1;Aip;Akt1;Bag1;Calm1;Chchd4;Dnaja1;Dnajc15;Dnm1l;Fis1;Fkbp8;Grpel1;Gsk3a;Hspa4;Hspd1;Mapk9;Mterf4;Oxa1l;Pam16;Pmpcb;Prkaa1;Rala;Samm50;Timm10;Timm13;Timm17a;Timm21;Timm22;Timm23;Timm44;Timm8a1;Timm9;Tomm20;Tomm22;Tomm34;Tomm40;Tomm7;Tomm70;Tspo;Ywhaz
GO:0007005	mitochondrion organization	http://amigo.geneontology.org/amigo/term/GO:0007005	0.457882	2.30723	0	0	308	./Project_wg_result1778042654_GSEA/GO_0007005.png	157	363442;246294;29507;297990;497930;500384;499529;25488;25176;295923;315167;84480;291103;288584;312444;289218;498358;24787;85333;300948;81757;282819;301458;63864;24242;140908;293938;117287;361385;64371;362440;294973;83531;293453;362588;296966;290652;497863;298748;300075;293114;363474;25479;296086;297436;290999;288150;64464;64862;361805;293130;114766;690285;140937;114562;298203;679907;83533;171415;4…	Acad9;Afg3l2;Agtpbp1;Aifm1;Akt1;Akt3;Alkbh7;Apoo;Arfip2;Armcx3;Atg3;Atg7;Atpaf1;Bad;Bcl2l1;Bcl2l2;Becn1;Bloc1s2;Bnip3;Bok;Calm1;Camkmt;Cdc37;Cdk5;Chchd3;Chchd4;Chchd6;Coa3;Coa4;Cox7a2;Dcn;Dnm1l;Fis1;Fkbp8;Flcn;Fmc1;Fundc1;Gclc;Gclm;Ggct;Ghitm;Gpx1;Gsk3a;Hax1;Hgf;Hif1a;Higd1a;Higd2a;Hsd17b10;Hsp90aa1;Hspa4;Hspd1;Htra2;Immt;Jtb;Kif5b;Lyrm2;Lyrm7;Map1lc3b;Mapk9;Miga2;Mllt11;Mtfr1;Mtfr1l;Mtx2;Ndufa11…
GO:0006839	mitochondrial transport	http://amigo.geneontology.org/amigo/term/GO:0006839	0.496396	2.18534	0	0	113	./Project_wg_result1778042654_GSEA/GO_0006839.png	59	171087;25176;84480;85333;282819;266601;293938;83531;100359982;300075;171433;25479;688811;288150;64464;290370;679907;83533;312559;29635;29743;79463;83529;54312;290596;60434;29560;252928;79563;365567;50686;54311;171432;300111;679944;171139;685620;81751;171116;301067;65042;117024;63868;25283;360992;304017;24185;291709;308416;307350;307210;266759;360636;363206;364601;299331;315023;29884;298081	Afg3l2;Aifm1;Akt1;Alkbh7;Bcl2l2;Bloc1s2;Bnip3;Bok;Chchd4;Crym;Dnajc15;Gclc;Ghitm;Grpel1;Gsk3a;Hif1a;Hsp90aa1;Hspa4;Hspd1;Micu1;Micu2;Micu3;Mpc1;Mpc2;Mtx2;Opa1;Pam16;Pnpt1;Ppif;Psen2;Samm50;Sfxn3;Slc25a1;Slc25a28;Slc25a32;Slc25a38;Slc25a39;Slc25a4;Slc25a46;Slc25a5;Timm10;Timm13;Timm17a;Timm21;Timm22;Timm23;Timm44;Timm9;Tmem14a;Tmem14c;Tomm20;Tomm22;Tomm40;Tomm7;Tomm70;Trmt10b;Vdac1;Vdac2;Vps35
GO:0043648	dicarboxylic acid metabolic process	http://amigo.geneontology.org/amigo/term/GO:0043648	0.537534	2.16937	0	0	63	./Project_wg_result1778042654_GSEA/GO_0043648.png	25	361071;24479;24368;25721;24398;298596;24551;298942;64313;157074;299857;541589;29416;362474;114096;114597;29739;290947;192268;293504;81829;361472;116568;24401;25283	Aadat;Adhfe1;Dld;Fh;Gclc;Gclm;Ggt1;Gls;Gls2;Got1;Got2;Idh1;Idh3a;Kyat3;Mdh1;Mdh2;Mthfd1l;Mtrr;Oat;Qprt;Sdha;Sdhb;Shmt2;Sucla2;Suclg1
GO:1902600	proton transmembrane transport	http://amigo.geneontology.org/amigo/term/GO:1902600	0.527072	2.1527	0	0	68	./Project_wg_result1778042654_GSEA/GO_1902600.png	20	299159;54322;366448;116664;297566;25176;291103;297797;83615;117596;116638;85333;282819;171335;117287;299971;94194;302526;436582;114766	Atp6ap1;Atp6ap2;Atp6v0e2;Atp6v1b2;Atp6v1c1;Atp6v1d;Atp6v1e1;Atp6v1f;Atp6v1h;Cox5b;Cox6c;Cox8a;Park7;Phb2;Ppif;Slc17a7;Slc25a4;Slc25a5;Uqcrfs1;Uqcrh
GO:0007215	glutamate receptor signaling pathway	http://amigo.geneontology.org/amigo/term/GO:0007215	-0.635044	-2.3499	0	0	51	./Project_wg_result1778042654_GSEA/GO_0007215.png	27	54257;24406;24417;24408;116671;29546;81666;24414;24416;170928;89808;25736;29627;24409;50592;25550;298521;24411;24407;25400;24412;24654;24418;64829;309207;24410;59312	Camk2a;Cdk5r1;Cx3cl1;Dagla;Gnaq;Gria1;Gria2;Grik2;Grik3;Grik4;Grik5;Grin1;Grin2a;Grin2b;Grin2c;Grin2d;Grm1;Grm3;Grm4;Grm5;Homer1;Kcnb1;Necab2;Plcb1;Shank3;Slc1a1;Unc13a
GO:0035249	synaptic transmission, glutamatergic	http://amigo.geneontology.org/amigo/term/GO:0035249	-0.564925	-2.35716	0	0	102	./Project_wg_result1778042654_GSEA/GO_0035249.png	49	54257;29642;24406;24417;24408;25017;29546;25248;24414;24416;29238;306782;79219;25075;140729;312108;60391;79220;140726;25559;29627;117096;24409;50592;363235;64830;25054;25369;24318;25472;308523;25692;298521;171297;24411;24407;24718;83501;24412;24418;24596;64829;25567;24592;24410;307940;287476;25398;59312	Abcc8;Adora2a;Als2;Cacna1a;Cacng5;Cacng8;Cdh2;Cnr1;Disc1;Drd2;Drd3;Gria1;Gria2;Grid1;Grid2;Grik2;Grik3;Grik4;Grik5;Grin1;Grin2a;Grin2b;Grin2c;Grin2d;Grm1;Grm3;Grm4;Grm5;Homer1;Htr1b;Kcnj8;Myo5a;Nf1;Ngfr;Nlgn2;Nlgn3;Nrxn1;Ntrk2;Ophn1;Plat;Reln;Ror2;Shank3;Slc38a2;Tnr;Tshz3;Unc13a;Unc13b;Zzef1
GO:0097485	neuron projection guidance	http://amigo.geneontology.org/amigo/term/GO:0097485	-0.544298	-2.40945	0	0	151	./Project_wg_result1778042654_GSEA/GO_0097485.png	84	306636;171287;305571;246331;79433;114524;316539;301346;114589;25473;360546;79208;299996;310630;314906;24338;257634;361764;84009;60629;25273;366270;366205;50687;297480;296789;84358;293042;252892;29745;79559;680883;58853;29227;312275;361833;140588;84609;60630;25356;116671;114500;114489;691317;289229;58946;56761;289392;50554;361324;171355;171119;81527;116690;286994;57027;65047;29744;246262;362049;30…	Adam17;Agrn;Alcam;Ank3;B3gnt2;Cdk5r1;Celsr3;Cntn2;Cntn4;Cntn5;Cxcl12;Dag1;Dcc;Draxin;Drgx;Dscam;Dscaml1;Edn3;Efna2;Efna5;Efnb2;Efnb3;Epha4;Epha5;Epha7;Ephb1;Ephb6;Flrt3;Foxp1;Gbx2;Gli3;Kalrn;Kif5a;L1cam;Lamb2;Lgi1;Lgr4;Lgr6;Lhx1;Lrp1;Lrp2;Lrtm2;Matn2;Myh10;Ncam1;Nectin1;Nfasc;Nfib;Ngfr;Notch3;Nr4a3;Nrp1;Nrp2;Ntn3;Plxna2;Plxna3;Plxnb1;Plxnb3;Pou4f2;Ptpro;Reln;Robo1;Sema3d;Sema3e;Sema3g;Sema4a;Sema…
GO:0098742	cell-cell adhesion via plasma-membrane adhesion molecules	http://amigo.geneontology.org/amigo/term/GO:0098742	-0.574853	-2.52926	0	0	135	./Project_wg_result1778042654_GSEA/GO_0098742.png	60	295027;116741;25544;65048;366205;50687;369016;81613;363058;306147;308571;641521;79559;25409;83513;89843;498281;116477;498515;58946;113970;89808;64865;60391;79220;300186;308417;308495;94202;171119;304982;306091;24716;79558;266729;306534;360652;310519;363517;116683;83501;25529;116658;306055;171394;360406;29182;192183;65096;24586;83466;315615;117242;317183;308912;29583;300519;65131;191571;83720	Acvr1;Adgrl1;Alcam;Amigo2;Cadm1;Cdh2;Cdh22;Cdh24;Cdh6;Ceacam1;Celsr3;Cldn5;Clstn2;Cntn4;Cx3cl1;Cxadr;Dab1;Dchs1;Dscam;Dscaml1;Efna5;Esam;Fat1;Fat2;Fat3;Flrt3;Grid2;Igsf9;L1cam;Lrfn3;Lrrc4;Lrrc4b;Magi2;Mmp24;Myadm;Ncam1;Nectin1;Nectin2;Nectin4;Nrxn1;Pcdh17;Pcdh18;Pcdh19;Pcdh8;Pcdh9;Pcdha4;Pecam1;Plxnb3;Ptprf;Ptprr;Ptprs;Ret;Robo1;Sdk2;Sele;Slitrk1;Slitrk3;Tenm2;Unc5d;Wnk1
GO:0051703	biological process involved in intraspecies interaction between organisms	http://amigo.geneontology.org/amigo/term/GO:0051703	-0.632733	-2.27169	0	0.000224425	48	./Project_wg_result1778042654_GSEA/GO_0051703.png	24	140610;317517;24379;24408;170848;361845;56718;116595;79219;60391;117096;287871;29386;171297;116508;25049;24718;309243;24855;25601;308435;78957;65027;59312	Atxn1;Brinp1;Chd8;Cic;Eif4ebp2;Gad1;Grid1;Grin1;Kcnq2;Mecp2;Mtor;Nlgn2;Nlgn3;Nrxn1;Nrxn2;Nrxn3;Oprm1;Ptchd1;Reln;Rptor;Shank1;Shank3;Tsc2;Vps13a
GO:0071806	protein transmembrane transport	http://amigo.geneontology.org/amigo/term/GO:0071806	0.577782	2.1233	0	0.00030483	43	./Project_wg_result1778042654_GSEA/GO_0071806.png	28	266601;64460;300075;290370;679907;83533;312559;29635;24468;363253;79463;29534;54312;79563;54311;685620;116650;63868;304017;312903;308410;308416;307210;312703;304971;309858;680476;64537	Aifm1;Bloc1s3;Chchd4;Dnajc15;Grpel1;Hpse;Hspa8;Hspd1;Pam16;Pex14;Pex2;Pex5;Rtn2;Sec63;Srp54a;Timm17a;Timm21;Timm22;Timm23;Timm44;Tomm20;Tomm22;Tomm40;Tomm40l;Tomm7;Tomm70;Tram1;Zfand2b
GO:0001764	neuron migration	http://amigo.geneontology.org/amigo/term/GO:0001764	-0.505903	-2.18663	0	0.000320607	126	./Project_wg_result1778042654_GSEA/GO_0001764.png	44	296789;84027;24553;309156;287110;310635;114501;117016;116671;64021;314473;140942;60328;315530;360840;83825;361324;81527;57027;29613;25159;100361323;192126;266729;362049;25054;24318;306534;252880;24718;25400;309280;363412;310533;310448;100365935;310753;25613;25311;83466;361103;307940;24772;191571	Adam17;Arhgap32;Arhgef2;Astn2;Bbs1;Camk2a;Cdk5r1;Celsr3;Cep85l;Cxcl12;Dab1;Dab2ip;Dcc;Dclk1;Ddit4;Disc1;Drd2;Drgx;Fat3;Gata2;Gpr173;Gsk3b;Igsf10;Kif26a;Lmx1b;Lrig2;Mark1;Mark2;Met;Nrp2;Ntrk2;Ntrk3;Plxna3;Ptprz1;Rapgef2;Reln;Sema3e;Sema6a;Srgap2;Tbc1d24;Unc5c;Unc5d;Zfp609;Zmiz1
GO:0045454	cell redox homeostasis	http://amigo.geneontology.org/amigo/term/GO:0045454	0.68171	2.12674	0	0.000335313	21	./Project_wg_result1778042654_GSEA/GO_0045454.png	13	58815;113898;116484;79116;117254;79462;29338;64371;24404;25283;85274;83619;83709	Apex1;Gclc;Git1;Glrx3;Gpx1;Nfe2l2;Prdx1;Prdx2;Prdx3;Prdx4;Prdx5;Txn1;Txn2
GO:0031163	metallo-sulfur cluster assembly	http://amigo.geneontology.org/amigo/term/GO:0031163	0.716389	2.10207	0.00197628	0.000349285	16	./Project_wg_result1778042654_GSEA/GO_0031163.png	8	58815;290985;288740;293453;307649;29231;287125;360826	Ciao1;Ciapin1;Glrx3;Hscb;Isca1;Iscu;Ndufab1;Nubp2
GO:0003158	endothelium development	http://amigo.geneontology.org/amigo/term/GO:0003158	-0.516554	-2.1979	0	0.000374042	107	./Project_wg_result1778042654_GSEA/GO_0003158.png	31	294809;59326;24627;81521;689710;25589;50554;50671;305918;444983;116670;84010;79558;406162;288583;311723;311332;25529;310533;24654;81743;502886;25366;305081;26955;299284;89806;312936;25496;29583;65131	Acvr1;Acvr2b;Adamts12;Afdn;Apold1;Cd34;Cldn5;Dicer1;Dll1;Dll4;Fasn;Foxj2;Heg1;Ift88;Kdr;Msn;Notch1;Notch4;Pde2a;Pde4d;Pecam1;Plcb1;Plod3;Ppp1r12a;Ptprs;Rapgef2;Rapgef3;Smad4;Sox17;Sox18;Tie1
GO:0060840	artery development	http://amigo.geneontology.org/amigo/term/GO:0060840	-0.526599	-2.11238	0	0.00044885	77	./Project_wg_result1778042654_GSEA/GO_0060840.png	19	59107;406162;306571;288057;293047;311332;497010;29633;366980;295461;81743;25366;24596;24592;361103;29216;25496;299858;245977	Acvr2b;Adgrf5;Arid2;Dll4;Eng;Kat6a;Kif7;Lrp1;Lrp2;Ltbp1;Mylk;Ndst1;Nf1;Ngfr;Notch1;Notch4;Pde2a;Sec24b;Zmiz1
GO:0021510	spinal cord development	http://amigo.geneontology.org/amigo/term/GO:0021510	-0.507243	-2.11516	0	0.000498722	88	./Project_wg_result1778042654_GSEA/GO_0021510.png	33	29375;297480;293165;499362;367242;140588;84046;59326;691317;56718;313507;58946;305918;25159;24409;289026;50592;65047;84010;58968;266729;29386;308415;252880;65209;311332;24718;25529;24592;25311;299284;25398;25496	Acan;Cacna1a;Dab1;Dcc;Dicer1;Dll1;Dll4;Draxin;Drgx;Dync2h1;Ercc2;Foxp1;Gata2;Gli3;Gria1;Grin2a;Ift88;Lbx1;Mecp2;Mtor;Nf1;Notch1;Ptprs;Rab23;Rapgef3;Reln;Robo1;Slit1;Sox11;Sox13;Sox6;Tal1;Uncx
GO:1990806	ligand-gated ion channel signaling pathway	http://amigo.geneontology.org/amigo/term/GO:1990806	-0.620392	-2.10012	0	0.000510057	33	./Project_wg_result1778042654_GSEA/GO_1990806.png	15	54257;24406;24408;116671;81666;29627;24409;50592;298521;24411;24407;25400;24412;24654;24410	Camk2a;Cdk5r1;Gnaq;Gria1;Gria2;Grik2;Grik3;Grik4;Grik5;Grin1;Grin2a;Grin2b;Grin2c;Grin2d;Plcb1
GO:0022613	ribonucleoprotein complex biogenesis	http://amigo.geneontology.org/amigo/term/GO:0022613	0.413835	2.07203	0	0.000515867	268	./Project_wg_result1778042654_GSEA/GO_0022613.png	111	117053;122799;81763;100912032;25498;29288;299872;292831;29258;297699;29284;246042;362631;373541;81729;100362640;140655;691534;363289;81776;305258;298700;65160;499391;124323;288615;299027;289740;100312984;688288;363646;296596;301463;29286;682390;689284;364430;113958;315705;161477;299198;64306;289307;246216;81775;81773;83789;305506;315550;290647;299899;499191;94266;65136;361159;291061;292536;297082…	Abt1;C1qbp;Clns1a;Ddx10;Ddx28;Ddx52;Eif2s3;Eif2s3y;Eif3b;Eif3d;Eif3e;Eif3f;Eif3g;Eif3h;Eif3i;Eif4a3;Eif5;Eif6;Eral1;Eri1;Esf1;Fastkd2;Fbl;Fcf1;Ftsj3;Gemin7;Gtf2h5;Hsp90aa1;Hsp90ab1;Lsm4;Lyar;Malsu1;Mcts1;Mettl18;Mrm2;Mrps7;Mterf4;Ncbp1;Ngrn;Nifk;Nip7;Nmd3;Nop10;Nop16;Nop56;Npm1;Nsun5;Nudt21;Nufip1;Pes1;Pih1d1;Pop4;Prkra;Prpf19;Prpf31;Ptges3;Ran;Rasl2-9;Rbm34;Riok1;Riok2;Rpf2;Rpl10a;Rpl11;Rpl27;Rp…
GO:0099565	chemical synaptic transmission, postsynaptic	http://amigo.geneontology.org/amigo/term/GO:0099565	-0.506947	-2.1269	0	0.000561063	102	./Project_wg_result1778042654_GSEA/GO_0099565.png	44	24922;83810;54257;25674;84027;24553;287110;29480;116839;25297;307757;24408;81657;24414;89808;60391;79220;84685;29627;117096;24409;50592;84556;29386;25369;171297;24411;24407;25049;24718;24412;192247;29665;140447;24596;296374;25103;26955;85275;24410;25601;78957;56768;59312	Adora2a;Afdn;Atxn1;Cacnb3;Chrnb4;Cx3cl1;Gabbr1;Gabrb3;Glra1;Gria1;Gria2;Grid2;Grik2;Grik5;Grin1;Grin2a;Grin2b;Grin2c;Grin2d;Grm1;Gsk3b;Mecp2;Met;Mpp2;Neto2;Ngfr;Nlgn2;Nlgn3;Nrxn1;Oprm1;P2rx7;Pclo;Ppp1r9a;Reln;Rgs4;Rims1;Rims2;Sez6;Shank1;Shank3;Slc8a2;Tbc1d24;Trpv1;Zmynd8
GO:0048667	cell morphogenesis involved in neuron differentiation	http://amigo.geneontology.org/amigo/term/GO:0048667	-0.413376	-2.07138	0	0.000654573	429	./Project_wg_result1778042654_GSEA/GO_0048667.png	177	79433;114524;316539;301346;25537;114589;29483;25473;362700;360546;311462;499749;79208;299996;266777;365748;310630;314906;302473;29433;114486;192352;24215;291209;24338;257634;361764;305679;84009;499425;293996;60629;25152;25273;366270;308458;25595;81646;360663;366205;50687;287545;297480;307833;84008;299117;296789;84027;313255;24553;309156;84358;293042;306147;252892;29745;287110;79559;680883;58853;2…	Actb;Adam17;Adcy10;Adgrb3;Adnp;Afdn;Agrn;Alcam;Als2;Ank3;Apc;Arhgap32;Arhgap4;Atp2b2;Bbs1;Bcl2;Bhlhe22;Braf;Btbd3;Cacna1a;Camk2a;Cask;Cdh2;Cdk5r1;Celsr3;Cit;Clic5;Cntn2;Cntn4;Cntn5;Cntnap1;Creb1;Cxcl12;Dab1;Dag1;Dcc;Dclk1;Dip2b;Disc1;Draxin;Drd2;Drgx;Dscam;Dscaml1;Edn3;Efna2;Efna5;Efnb3;Epha4;Epha5;Ephb1;Ephb6;Farp1;Fat3;Flrt3;Foxp1;Gbx2;Gli3;Grin1;Gsk3b;Hecw1;Igf1r;Ist1;Kalrn;Kidins220;Kif1a;Kif…
GO:0061564	axon development	http://amigo.geneontology.org/amigo/term/GO:0061564	-0.415671	-2.06004	0	0.000690539	370	./Project_wg_result1778042654_GSEA/GO_0061564.png	134	24338;257634;361764;305679;84009;60629;25152;25273;366270;308458;684516;25595;81646;24516;366205;50687;297480;307833;84008;299117;296789;84027;84358;293042;306147;252892;29745;287110;79559;680883;58853;29227;312275;361833;140588;29254;24408;84609;25718;81822;60630;25356;116671;114500;114489;116564;25248;246249;691317;29456;59320;24224;289229;58946;56761;60328;289392;50554;361450;315530;116640;247…	Actb;Adam17;Adcy10;Adnp;Agrn;Alcam;Als2;Ank3;Apc;Arhgap32;Arhgap4;Bcl2;Cacna1a;Cacna1c;Camsap2;Cdh2;Cdk5r1;Celsr3;Chst3;Cnr1;Cntn2;Cntn4;Cntnap1;Creb1;Cxcl12;Dab1;Dag1;Dcc;Dclk1;Dip2b;Disc1;Draxin;Drd2;Drgx;Dscam;Dscaml1;Edn3;Efna2;Efna5;Ephb1;Ephb6;Flrt3;Foxp1;Gbx2;Gli3;Grin1;Gsk3b;Igf1r;Ist1;Jun;Kalrn;Kcnc4;L1cam;Lgi1;Lgr4;Lgr6;Lhx1;Lrig2;Lrp1;Lrp2;Lrtm2;Macf1;Map1a;Map1b;Map2;Map3k13;Mark2;Mgl…
GO:0043632	modification-dependent macromolecule catabolic process	http://amigo.geneontology.org/amigo/term/GO:0043632	0.388743	2.02455	0	0.000838284	404	./Project_wg_result1778042654_GSEA/GO_0043632.png	156	81763;100912032;29669;287280;289874;289924;311078;25490;25581;29258;29282;29673;362631;29677;373541;292766;681059;140657;117263;116725;297498;287927;291609;300948;292925;29668;298982;29670;117287;81920;140639;308051;29676;287367;83809;301442;299602;681578;81827;316348;365388;299113;287155;246146;58974;192218;64363;306257;287873;83427;619577;83499;690634;24908;300849;366381;690244;29425;83806;2975…	Agap3;Agtpbp1;Akt1;Amn1;Anapc10;Ankrd9;Araf;Arih2;Arrdc1;Bag2;Bap1;Bend5;Birc2;Camlg;Canx;Ccdc47;Cdc26;Cdc27;Cdc34;Chmp2a;Chmp3;Chmp5;Chmp6;Cops3;Crbn;Cul1;Cul2;Dcaf11;Derl1;Dnajb2;Dnajb9;Eif3h;Erlec1;Faf1;Fbxl15;Fbxl4;Fbxo3;Fbxo32;Fbxo38;Fbxo6;Fbxo8;Fbxo9;Fhit;Gabarap;Gclc;Get4;Gid8;Gipc1;Gsk3a;Hsp90ab1;Hspbp1;Il33;Itch;Kat5;Kctd10;Kctd17;Klhdc2;Klhdc3;Klhl20;Klhl22;Klhl8;Lnx1;Maea;Man1b1;Mapk9;…
GO:0050808	synapse organization	http://amigo.geneontology.org/amigo/term/GO:0050808	-0.413292	-2.05514	0	0.00088167	416	./Project_wg_result1778042654_GSEA/GO_0050808.png	185	170641;290467;306636;308988;171287;316003;60445;29302;363455;246331;25513;25393;691337;79433;316539;314961;313785;499668;25537;114589;65025;25473;404781;360546;24171;79208;266777;116655;25466;310630;302473;29433;24215;171447;688721;24338;310392;84009;499425;353230;315840;59318;60324;29755;84347;308458;58942;500219;314251;24922;366205;50687;679668;84008;296789;84022;84027;363058;306147;84470;30857…	Abhd17c;Actb;Add2;Adgrb1;Adgrb2;Adgrb3;Adgrl1;Adgrl2;Adgrl3;Adnp;Afdn;Agrn;Als2;Amigo2;Amigo3;Ank3;Arhgef7;Asap1;Asic2;Atp2b2;Bcan;Cacna1a;Cacna2d2;Cacnb1;Cacnb3;Cacnb4;Cacng2;Cadm1;Cask;Cdh2;Cdh6;Cdk5r1;Chd4;Chrdl1;Clstn2;Cnksr2;Cntn2;Cntn5;Cntnap1;Col4a1;Col4a5;Colq;Cttnbp2;Dab2ip;Dag1;Disc1;Drd2;Drp2;Dscam;Efna5;Efnb2;Efnb3;Elfn1;Epha4;Epha5;Epha7;Ephb1;Erbb4;Farp1;Flrt1;Flrt3;Fzd5;Gabrb3;Ghsr…
GO:0060976	coronary vasculature development	http://amigo.geneontology.org/amigo/term/GO:0060976	-0.582201	-2.03581	0	0.00157098	38	./Project_wg_result1778042654_GSEA/GO_0060976.png	14	58946;171104;59107;25472;293047;65209;29633;366980;295461;81743;25560;29216;25496;299858	Abcc9;Arid2;Dync2h1;Gper1;Kcnj8;Kif7;Lrp1;Lrp2;Ltbp1;Ndst1;Notch1;Pde2a;Robo1;Sec24b
GO:1902742	apoptotic process involved in development	http://amigo.geneontology.org/amigo/term/GO:1902742	-0.607866	-2.02129	0	0.00161306	30	./Project_wg_result1778042654_GSEA/GO_1902742.png	11	24883;305960;291445;317674;297801;64547;293992;311549;362938;25496;161452	Bcl2l11;Fzd5;Lef1;Megf10;Notch1;Pax2;Scrib;Wt1;Xkr4;Xkr6;Xkr7
GO:0000959	mitochondrial RNA metabolic process	http://amigo.geneontology.org/amigo/term/GO:0000959	0.567893	1.98349	0	0.00178135	36	./Project_wg_result1778042654_GSEA/GO_0000959.png	17	303746;304012;363289;63864;360977;300852;301463;289307;315550;313867;502633;65248;360992;312616;307806;83474;292759	Fastkd2;Hsd17b10;Lrpprc;Mettl8;Mrpl12;Mterf4;Mto1;Pnpt1;Prkaa1;Rpusd4;Sars2;Tbrg4;Tfam;Tfb2m;Thap11;Trmt10c;Trnt1
GO:0017004	cytochrome complex assembly	http://amigo.geneontology.org/amigo/term/GO:0017004	0.650431	1.98563	0	0.00184422	19	./Project_wg_result1778042654_GSEA/GO_0017004.png	12	497930;291103;361805;690285;498000;690344;683512;691506;686506;291709;307210;501923	Coa3;Lyrm7;Sco1;Slc25a46;Smim20;Timm21;Tmem223;Ttc19;Uqcc1;Uqcc2;Uqcc3;Uqcrfs1
GO:0034329	cell junction assembly	http://amigo.geneontology.org/amigo/term/GO:0034329	-0.406779	-1.99426	0	0.00205723	326	./Project_wg_result1778042654_GSEA/GO_0034329.png	139	288665;311860;25554;81918;303798;501083;246212;25237;301363;170641;290467;306636;171287;316003;60445;29302;246331;25513;313785;499668;25537;114589;360546;24171;84351;266777;25466;100363276;310630;302473;64355;171447;688721;83805;24338;305679;353230;315840;59318;29755;311163;500219;81523;24922;366205;679668;84008;84022;84027;54308;363058;306147;84470;308571;641521;317674;680883;366492;301309;36647…	Abl1;Actb;Acvrl1;Add2;Adgrb1;Adgrb2;Adgrb3;Adgrl1;Adgrl2;Adgrl3;Adnp;Afdn;Agrn;Aloxe3;Amigo2;Amigo3;Arhgap6;Arvcf;Asic2;Bcl2;Cacna1a;Cadm1;Camsap3;Cdh2;Cdh22;Cdh24;Cdh6;Chd4;Cldn5;Clstn2;Cntn5;Cntnap1;Col16a1;Colq;Coro2b;Ctnnd1;Cux2;Drd2;Dscam;Efna5;Efnb2;Efnb3;Epha2;Epha7;Ephb1;Erbb4;Esam;Farp1;Fer;Flrt1;Flrt3;Fzd5;Gabrb3;Ghsr;Gjc1;Gnpat;Gria1;Grid2;Grin1;Gsk3b;Icam5;Ikbkb;Il1rap;Itgb3;Kcnj8;Kdr…
GO:0051481	negative regulation of cytosolic calcium ion concentration	http://amigo.geneontology.org/amigo/term/GO:0051481	-0.67022	-1.99712	0.00380952	0.00217824	19	./Project_wg_result1778042654_GSEA/GO_0051481.png	9	29715;29238;24224;29598;24318;94338;25601;689560;299858	Atp2b1;Bcl2;Drd2;Drd3;Lrp1;Oprm1;Ryr2;Slc8a1;Smpd3
GO:0019226	transmission of nerve impulse	http://amigo.geneontology.org/amigo/term/GO:0019226	-0.485417	-1.98048	0	0.00230331	82	./Project_wg_result1778042654_GSEA/GO_0019226.png	36	66016;84347;308458;684516;58942;53949;54257;84008;25674;84022;361833;170848;116564;29710;56718;140729;171104;24766;140726;497770;83731;116690;29613;50592;25665;25054;25472;29682;56827;84390;29665;114862;25103;25567;25601;25398	Ank3;Cacna1a;Cacna1h;Cacna1i;Cacnb4;Cacng2;Cacng5;Cacng8;Chrm5;Chrnb4;Cntnap1;Ghsr;Glra1;Gper1;Gria1;Grik2;Hcn1;Kcnc4;Kcnj8;Kcnma1;Kcnmb4;Kcnq2;Kcnq3;Mtor;Nfasc;Npr2;Ntrk2;Ntrk3;Oprm1;P2rx7;Scn2a;Scn3a;Scn5a;Scn8a;Sptbn4;Tnr
GO:0002064	epithelial cell development	http://amigo.geneontology.org/amigo/term/GO:0002064	-0.435576	-1.95828	0	0.00308585	158	./Project_wg_result1778042654_GSEA/GO_0002064.png	53	685072;83805;305679;24715;84481;362237;25273;24883;315745;24208;369016;24553;317674;366492;306022;406228;246150;59326;24627;81521;25446;315617;24706;60447;689710;113970;25589;306204;50671;305918;83731;301737;25159;116670;84010;406162;288583;311723;308408;83501;362015;25529;310533;24654;81743;26955;299284;29452;25496;29583;192181;65131;83720	Afdn;Akap9;Ampd2;Ar;Arid4b;Cdh2;Cldn5;Clock;Dicer1;Dll1;Epas1;Epha2;Fasn;Fat1;Fem1b;Fer;Flnb;Fndc3a;Fosl2;Fzd5;Gata2;Gpr4;Heg1;Ift88;Kcnma1;Kdr;Krt2;Magi2;Met;Msn;Myadm;Notch1;Notch4;Pde2a;Pde4d;Pecam1;Plcb1;Plod3;Podxl;Ppp1r12a;Ptprs;Rapgef2;Rapgef3;Rarb;Rarg;Ren;Sidt2;Smo;Sox18;Src;Tbc1d20;Vcl;Wt1
GO:0098739	import across plasma membrane	http://amigo.geneontology.org/amigo/term/GO:0098739	-0.447547	-1.95373	0	0.00325951	137	./Project_wg_result1778042654_GSEA/GO_0098739.png	53	24211;29482;310392;64554;58976;266733;171148;83810;170573;84012;29642;79111;171143;29480;287715;170567;155205;192215;24414;116477;29715;306009;306811;65195;78966;84551;59266;29713;246280;25559;65197;171373;25665;25550;79212;287532;50719;25472;24782;25122;305131;25743;192208;140447;24239;29464;84429;289443;25560;29216;25398;363229;24778	Abcc8;Abcc9;Arhgef11;Atp1a1;Cacna1a;Cacna1c;Grm1;Hcn4;Kcnd3;Kcnj5;Kcnj6;Kcnj8;Kcnk9;Lrp2;Lrrc8c;Lrrc8d;Rgs4;Scn5a;Scnn1a;Slc12a5;Slc12a8;Slc15a4;Slc1a1;Slc1a2;Slc1a6;Slc27a5;Slc2a1;Slc2a5;Slc30a1;Slc36a1;Slc38a1;Slc38a2;Slc38a4;Slc38a5;Slc39a10;Slc39a14;Slc43a2;Slc6a1;Slc6a5;Slc6a6;Slc7a11;Slc7a2;Slc7a5;Slc7a8;Slc8a1;Slc8a2;Slc9a1;Slc9a5;Trpm4;Trpv1;Wnk1;Wnk2;Wnk4
GO:0048193	Golgi vesicle transport	http://amigo.geneontology.org/amigo/term/GO:0048193	0.403135	1.93388	0	0.00345176	192	./Project_wg_result1778042654_GSEA/GO_0048193.png	82	246294;287427;54350;58857;287276;64310;310710;29528;290627;299075;299258;362599;58842;312863;300674;83427;64187;690961;292074;65158;501550;85491;64154;60431;308061;65165;298675;297900;65134;79117;367073;360571;60384;171441;114024;362699;64664;300888;315461;84471;50556;683402;361207;289324;363476;64194;171122;29631;297522;503165;252889;361315;54190;360953;116643;362162;361171;113886;85421;25328;11…	Acsl3;Ap3s2;Arcn1;Arf1;Arf4;Arf5;Arfgap2;Arfgap3;Arl1;Arl3;Bet1;Ccdc91;Cnih4;Cog2;Cog4;Cog6;Copb1;Copb2;Copg1;Ehd3;Exoc5;Exoc6;Gcc2;Golga5;Golga7;Gosr2;Insig1;Kif1c;Klhl20;Lamp1;Nsf;Optn;P4hb;Pdcd6;Pef1;Preb;Prkd1;Rab14;Rab1a;Rab29;Rab2a;Rab33b;Rab34;Rabep1;Rack1;Rer1;Rnf139;Sar1b;Scfd1;Sec13;Sec22a;Sec22b;Snx1;Snx3;Steap2;Stx18;Stx5;Tgoln2;Tmed1;Tmed2;Tmed3;Tmed7;Tmed9;Tmem115;Trappc1;Trappc2;Tr…
GO:0140058	neuron projection arborization	http://amigo.geneontology.org/amigo/term/GO:0140058	-0.601569	-1.94232	0	0.00377442	27	./Project_wg_result1778042654_GSEA/GO_0140058.png	7	171296;498159;303811;303823;26955;29216;362587	Afdn;Dvl3;Lrp2;Macf1;Map3k13;Myo9a;Spry3
GO:0071526	semaphorin-plexin signaling pathway	http://amigo.geneontology.org/amigo/term/GO:0071526	-0.565147	-1.93109	0	0.00385426	38	./Project_wg_result1778042654_GSEA/GO_0071526.png	23	25415;316639;246331;301346;310630;361764;296789;24553;293042;29745;84609;25589;289392;361324;81527;29744;246262;363517;310207;309280;24586;316009;290562	Crmp1;Farp2;Kdr;Met;Ncam1;Nrp1;Nrp2;Plxna2;Plxna3;Plxnb1;Plxnb3;Sema3d;Sema3e;Sema3g;Sema4a;Sema4b;Sema4c;Sema4f;Sema4g;Sema5a;Sema6a;Sema6b;Sema6c
GO:0016358	dendrite development	http://amigo.geneontology.org/amigo/term/GO:0016358	-0.406647	-1.91576	0	0.00444175	224	./Project_wg_result1778042654_GSEA/GO_0016358.png	61	24408;65201;29647;365511;117016;297066;116671;56029;29456;363288;29149;56718;362950;58946;306183;360840;84685;83825;171119;316085;303313;117096;304982;116665;140933;192126;29491;171373;289400;304109;266729;83620;25054;29386;25671;280670;171297;29365;24718;25400;25529;499308;310533;192247;116478;360406;303599;24855;24596;296374;266802;311647;294917;25613;684527;26955;78957;307940;25398;59312;191571	Afdn;Alk;Cacna1a;Camk2a;Camsap2;Cask;Cdk5r1;Cit;Clip1;Crtc1;Dab1;Dab2ip;Dclk1;Disc1;Dscam;Farp1;Fat3;Flrt1;Grin1;Igsf9;Itsn1;Kidins220;Kif1a;Lzts3;Map1b;Mark1;Mecp2;Mpdz;Mtor;Ngfr;Nlgn2;Nlgn3;Ntrk2;Ppp1r9a;Prex1;Ptprf;Ptprs;Ptprz1;Rapgef2;Rbfox2;Reln;Rere;Robo1;Scarf1;Sez6;Shank1;Shank3;Slc12a5;Smad1;Srcin1;Srgap2;Strn;Tanc2;Tiam1;Tnik;Trak1;Trpc5;Tsc2;Zfp212;Zfp296;Zmynd8
GO:0051960	regulation of nervous system development	http://amigo.geneontology.org/amigo/term/GO:0051960	-0.377189	-1.89783	0	0.00460873	409	./Project_wg_result1778042654_GSEA/GO_0051960.png	122	366205;50687;25557;307833;679668;299117;296789;84027;24553;293042;140610;306147;24598;308571;29745;287110;310635;680883;24916;25164;301309;117523;140588;81514;84609;291439;29647;84046;313713;114500;114489;246249;691317;29456;303113;25364;29238;56718;24706;59320;64030;58946;89808;171104;25589;60391;289392;79220;300186;315530;303488;361324;64622;171355;690516;171119;313058;25559;316085;25744;29613;…	Abcc8;Acan;Adcy10;Adgrb1;Adgrb2;Adgrb3;Adgrl1;Adnp;Afdn;Agrn;Amigo2;Arhgap32;Arhgap4;Arhgef2;Asic2;Atxn1;Brinp1;Cask;Casz1;Cdh2;Cdkn2b;Cdon;Cit;Clstn2;Cx3cl1;Cxcl12;Dab1;Dag1;Dicer1;Dip2b;Disc1;Dll1;Dll4;Draxin;Drd2;Drd3;Dscam;Efna5;Flrt1;Flrt3;Gata2;Gbx2;Gli3;Gper1;Grid2;Grm5;Gsk3b;Hoxb3;Ist1;Jade2;Kdm4a;Kdr;Kit;L1cam;LRRTM1;Lrp1;Lrp2;Lrrc4b;Lrrn3;Lrtm2;Macf1;Map1b;Map3k13;Mbd1;Mecp2;Met;Mtor;My…
GO:0030900	forebrain development	http://amigo.geneontology.org/amigo/term/GO:0030900	-0.385033	-1.89837	0	0.00473786	348	./Project_wg_result1778042654_GSEA/GO_0030900.png	105	64356;81646;306562;25555;59265;29375;297480;299117;296789;116676;84027;29642;309156;84358;362160;353305;58853;317517;29227;140588;24408;84609;25718;360773;29647;80841;29600;304495;500453;688673;315676;170848;116671;81666;114500;691317;29715;314473;363288;24706;24224;58946;56761;84495;312108;360840;24766;83825;29458;50664;305918;25744;81527;29627;25159;306091;24409;50592;192126;65047;25665;266729;…	Afdn;Ak1;Aldh1a2;Alk;Apaf1;Atp2b4;Bbs1;Bcl2;Cacna1c;Cask;Cdh2;Cdk5r1;Cdon;Celf1;Creb1;Cxcl12;Dab1;Dab2ip;Dcc;Dclk1;Dclk2;Dicer1;Disc1;Dmxl2;Draxin;Drd2;Dync2h1;Efna2;Erbb4;Ets1;Fabp7;Foxp1;Gata2;Gbx2;Gli3;Gnao1;Gnaq;Gria1;Gria2;Grin1;Grin2a;Grin2b;Gsk3b;Herc1;Ift88;Igf1r;Kcnq2;Kdm2b;Kif1a;Kif26a;Lef1;Lrp1;Lrp2;Mecp2;Ncam1;Ncor2;Ndst1;Neurod1;Nf1;Nf2;Nfib;Nin;Notch1;Notch3;Nr4a3;Nrgn;Nrp2;Ntrk2;Og…
GO:0003007	heart morphogenesis	http://amigo.geneontology.org/amigo/term/GO:0003007	-0.417395	-1.90023	0	0.00479061	167	./Project_wg_result1778042654_GSEA/GO_0003007.png	45	25412;116676;29134;353305;29557;499362;298652;84046;365352;114489;29715;56718;689710;289229;58946;50554;305918;81527;307594;25654;84010;79558;313845;25472;361700;306571;311332;303811;497010;293148;366980;295461;304798;360468;360801;25560;24600;299284;361103;29216;689560;312936;308912;89804;25496	Abcc9;Acvr1;Aldh1a2;Arid2;Axin2;C2cd3;Col11a1;Col2a1;Dag1;Dchs1;Dicer1;Dll1;Dll4;Dvl3;Emp2;Eng;Heg1;Ift88;Kat6a;Kcnj8;Kdm2a;Lbx1;Lrp2;Mdm4;Mib1;Mical2;Mtor;Myh7;Ncor2;Nos3;Notch1;Nrp2;Robo1;Ryr2;Sec24b;Slc8a1;Smad4;Sos1;Sox11;Sox17;Tbx3;Tek;Ube4b;Vangl2;Zmiz1
GO:0003170	heart valve development	http://amigo.geneontology.org/amigo/term/GO:0003170	-0.537227	-1.90141	0	0.00489247	42	./Project_wg_result1778042654_GSEA/GO_0003170.png	11	56718;58946;50554;79558;311332;304798;81743;24600;89806;308912;25496	Acvr1;Dchs1;Dll4;Mdm4;Mtor;Nos3;Notch1;Pde2a;Robo1;Smad4;Tie1
GO:0006749	glutathione metabolic process	http://amigo.geneontology.org/amigo/term/GO:0006749	0.515363	1.87907	0.0021978	0.0054709	41	./Project_wg_result1778042654_GSEA/GO_0006749.png	19	294320;24479;24426;24787;117287;24439;292710;66028;24786;29739;156275;24440;116568;24377;24404;681913;25283;83619;295037	Arl6ip5;Ethe1;G6pd;Gclc;Gclm;Ggt1;Ggt7;Glo1;Gpx1;Gstp1;Gstz1;Hagh;Hbb;Idh1;Mgst2;Nfe2l2;Park7;Sod1;Sod2
GO:0051604	protein maturation	http://amigo.geneontology.org/amigo/term/GO:0051604	0.372991	1.88741	0	0.00554199	296	./Project_wg_result1778042654_GSEA/GO_0051604.png	111	58815;290985;366995;361310;64013;299809;311456;58857;60460;64198;24644;294864;288305;171133;282819;294362;287470;300721;309629;287069;290652;297994;302526;316348;65028;29374;291963;295217;362087;282827;29231;266606;114562;298203;316221;312559;64370;296278;361999;301432;292788;311468;690038;65142;24468;64367;361255;54312;79563;266758;360630;295230;303536;54311;29144;63865;116568;116456;293142;2530…	Aasdhppt;Afg3l2;Ahsa1;Aip;Anp32e;Arl2;Asrgl1;Atp6ap2;B2m;Bag1;Bag2;Bola3;Canx;Ccdc47;Cct2;Cct3;Cct4;Cct5;Cct8;Cd74;Cdc123;Cdc37;Cdc37l1;Chchd4;Chordc1;Ciao1;Cisd1;Cisd3;Comp;Corin;Ctsl;Ctsz;Dnaja1;Dnaja4;Dnajb11;Dnajb2;Dnajb6;Dnajc2;Dnajc5;Dnajc7;Dohh;Eno1;Fkbp4;Fkbp8;Gcsh;Ggt1;Glrx3;Grpel1;Hsp90aa1;Hsp90ab1;Hspa13;Hspa2;Hspa4;Hspa8;Hspd1;Isca1;Isca2;Lgmn;Lyrm7;Metap2;Mkks;Naglu;Nudc;Nudcd2;P4hb;…
GO:0003205	cardiac chamber development	http://amigo.geneontology.org/amigo/term/GO:0003205	-0.436592	-1.88181	0	0.0058041	113	./Project_wg_result1778042654_GSEA/GO_0003205.png	33	116596;353305;29557;311886;116548;298652;25718;84046;689710;289229;58946;50554;305918;81527;25654;25665;79558;313845;59107;25472;293047;311332;303811;497010;29633;304798;81743;24600;29216;689560;89804;25496;299858	Acvr1;Cntrl;Col11a1;Dll4;Dvl3;Eng;Heg1;Ift88;Igf1r;Kcnj8;Kif7;Lrp1;Lrp2;Ltbp1;Map3k8;Mdm4;Myh7;Ndst1;Nos3;Notch1;Nrp2;Pcsk5;Pde2a;Robo1;Ryr2;Scn5a;Smad4;Sos1;Sox11;Tbx3;Tek;Ube4b;Vangl2
GO:0050905	neuromuscular process	http://amigo.geneontology.org/amigo/term/GO:0050905	-0.42902	-1.87855	0	0.00587246	139	./Project_wg_result1778042654_GSEA/GO_0050905.png	45	84008;25674;363152;58853;170818;29557;24408;65198;80841;297066;25017;29546;116564;171409;29238;56718;362950;84495;60391;308709;79220;171355;25559;83731;64532;362665;117096;24409;29386;25369;24318;25472;308523;171297;24411;445271;24412;315771;25567;24410;78957;25398;65027;59312;94272	Abcc8;Adcy5;Adora2a;Cacna1a;Camta1;Chd8;Clic5;Cntnap1;Drd2;Drd3;Fabp7;Glra1;Grid2;Grin1;Grin2a;Grin2b;Grin2c;Grin2d;Herc1;Homer1;Icmt;Jph4;Kcnh1;Kcnj8;Kcnma1;Mecp2;Mtor;Myh7;Myo5a;Nlgn2;Nlgn3;Npr2;Nr4a3;Nrxn1;Pou4f2;Rbfox2;Shank1;Shank3;Stac;Synm;Tnnt1;Tnr;Tshz3;Xrcc1;Zfp212
GO:0042476	odontogenesis	http://amigo.geneontology.org/amigo/term/GO:0042476	-0.453785	-1.86661	0	0.00591666	83	./Project_wg_result1778042654_GSEA/GO_0042476.png	29	25585;317346;83805;298518;25273;304334;29134;140588;29263;25017;64547;116640;25586;50664;305918;25744;303635;500863;84482;25665;689616;94338;25366;24596;192183;24205;305081;299284;161452	Acvr2a;Acvr2b;Alpl;Apc;Apcdd1;Axin2;Bcl2l11;Bcor;Cd34;Csf3r;Dicer1;Fam20a;Fam20c;Foxo1;Gli3;Gnao1;Id3;Ift88;Lef1;Myo5a;Nectin1;Nf2;Ngfr;Rspo2;Scn5a;Smo;Smpd3;Src;Tnc
GO:0050803	regulation of synapse structure or activity	http://amigo.geneontology.org/amigo/term/GO:0050803	-0.396311	-1.87047	0	0.00596129	239	./Project_wg_result1778042654_GSEA/GO_0050803.png	98	79433;316539;314961;313785;499668;25537;65025;360546;116655;25466;310630;302473;29433;171447;688721;24338;310392;84009;353230;59318;29755;500219;366205;679668;84008;84022;84027;306147;308571;680883;301309;117523;81514;24408;29647;116671;56029;29546;361601;114489;266976;295695;363288;25364;306782;79219;58946;113970;60328;306183;64865;60391;79220;300186;84685;308495;64622;432361;313058;81527;29613;…	Abhd17c;Adgrb1;Adgrb2;Adgrb3;Adgrl1;Adgrl2;Adnp;Afdn;Agrn;Amigo2;Asap1;Asic2;Cask;Cdh2;Cdk5r1;Chd4;Clstn2;Cntnap1;Colq;Cttnbp2;Dab2ip;Dag1;Disc1;Drd2;Efna5;Efnb3;Epha4;Ephb1;Farp1;Flrt1;Flrt3;Ghsr;Grid1;Grid2;Grin1;Grin2b;Gsk3b;Hnrnpm;Homer1;Icam5;Igsf9;Il1rap;Itsn1;Kalrn;Kif1a;LRRTM1;Lhfpl4;Lingo4;Lrfn1;Lrfn3;Lrfn4;Lrrc4b;Lrrn3;Lrrtm4;Lrtm2;Lzts3;Magi2;Mark2;Mecp2;Myh10;Nectin1;Negr1;Nf1;Nlgn2;N…
GO:0048514	blood vessel morphogenesis	http://amigo.geneontology.org/amigo/term/GO:0048514	-0.372981	-1.87075	0	0.00615359	404	./Project_wg_result1778042654_GSEA/GO_0048514.png	86	29600;365037;170911;311760;24790;364754;59326;286896;292658;114500;114489;116564;64345;116477;100363275;303604;60664;84382;25313;313507;689710;58946;89808;56761;25589;303488;361324;313058;25559;81527;100363145;444983;25159;299145;81641;192126;295490;84010;79558;25550;313845;362931;25054;29386;554172;25738;406162;25671;306571;288057;310207;311723;311332;294322;308408;83501;310533;497010;366980;295…	Abcc8;Acvr1;Adgra2;Adgrb1;Adgrb2;Adgrf5;Adtrp;Angptl4;Anpep;Apold1;Arid2;Atp2b4;Cd34;Cdh2;Cldn5;Col4a1;Cspg4;Cx3cl1;Cxcl12;Dab2ip;Dag1;Dicer1;Dll1;Dll4;Egf;Emcn;Emp2;Eng;Epas1;Ets1;Foxj2;Fzd8;Gata2;Gbx2;Gjc1;Gpr4;Heg1;Hif3a;Hoxb3;Ism1;Kat6a;Kdr;Lef1;Lrp1;Lrp2;Map3k3;Mecp2;Mylk;Nf1;Ngfr;Nos3;Notch1;Notch3;Notch4;Npr2;Nrp2;Ntrk2;Pecam1;Pik3ca;Pik3r3;Pknox1;Plcg1;Prkd2;Pxdn;Rapgef2;Rapgef3;Rhoj;Robo…
GO:0010498	proteasomal protein catabolic process	http://amigo.geneontology.org/amigo/term/GO:0010498	0.361953	1.85721	0	0.0070835	343	./Project_wg_result1778042654_GSEA/GO_0010498.png	127	29669;287280;289874;289924;311078;497930;25581;85492;29673;362631;29677;373541;292766;140657;117263;116725;297498;287927;29668;298982;29670;117287;81920;25502;140639;64670;29676;83809;301442;299602;81827;299113;287155;246146;58974;192218;64363;83427;619577;286758;83499;690634;24908;300849;366381;246216;690244;266606;29425;83806;689248;24673;192351;29675;690038;299899;116722;363253;289508;83823;19…	Agap3;Akt1;Alad;Amn1;Ankrd9;Aqp11;Araf;Arih2;Bag2;Birc2;Camlg;Canx;Ccdc47;Cdc26;Cdc27;Cdc34;Crbn;Cul2;Dcaf11;Dnajb9;Ecscr;Eif3h;Erlec1;Faf1;Fbxl15;Fbxl4;Fbxo3;Fbxo38;Fbxo6;Fbxo9;Fhit;Gabarap;Gabarapl2;Gclc;Get4;Gid8;Gipc1;Gpx1;Gsk3a;Hsp90ab1;Hspbp1;Il33;Itch;Kat5;Kctd10;Kctd17;Klhdc2;Klhdc3;Klhl22;Lamp3;Maea;Man1b1;Mapk9;Naglu;Nfe2l2;Ngly1;Nploc4;Nsfl1c;Oaz1;Park7;Pcbp2;Pja2;Ppp2cb;Prpf19;Psen2;P…
GO:0042303	molting cycle	http://amigo.geneontology.org/amigo/term/GO:0042303	-0.457061	-1.84092	0	0.00792089	75	./Project_wg_result1778042654_GSEA/GO_0042303.png	21	25017;312574;60447;497948;24224;289229;50554;287422;286994;303519;313845;308415;689616;311723;290300;117036;24596;24205;24592;299284;25496	Apc;Apcdd1;Bcl2;Clock;Dicer1;Ercc2;Krt25;Lamc1;Lgr4;Lrig1;Myo5a;Nf1;Ngfr;Notch1;Per1;Smad4;Sos1;Sox18;Tnfrsf19;Trpv3;Vangl2
GO:0060560	developmental growth involved in morphogenesis	http://amigo.geneontology.org/amigo/term/GO:0060560	-0.3916	-1.80216	0	0.0112836	191	./Project_wg_result1778042654_GSEA/GO_0060560.png	63	25273;366270;25595;366205;50687;307833;299117;296789;84027;363058;293042;29745;79559;116839;117523;29254;84609;116671;116564;246249;691317;29456;303113;59320;365468;289229;58946;315530;116640;83825;361324;64622;171355;690516;171119;81527;29613;140933;65047;84556;304109;29744;246262;29386;303206;309650;171297;310207;116683;309280;25529;499308;300231;64829;303823;25567;26955;307940;290562;25496;299…	Adcy10;Adnp;Afdn;Alcam;Arhgap32;Arhgap4;Cadm1;Cdk5r1;Cpne5;Cxcl12;Dclk1;Dip2b;Disc1;Draxin;Dscam;Edn3;Efna5;Flrt1;Flrt3;Gsk3b;Ist1;Jade2;L1cam;Lrp1;Lzts2;Macf1;Map1b;Map2;Map3k13;Mecp2;Mgll;Nin;Nlgn3;Notch1;Npr2;Nrp2;Ntrk3;Plxna3;Pou4f2;Ptprs;Rims1;Rims2;Robo1;Sema3d;Sema3e;Sema3g;Sema4b;Sema4f;Sema5a;Sema6a;Sema6b;Sema6c;Slit1;Smo;Smurf1;St8sia2;Tiam1;Tnc;Tnr;Trpc5;Ulk2;Unc13a;Vangl2
GO:0048857	neural nucleus development	http://amigo.geneontology.org/amigo/term/GO:0048857	-0.604328	-1.80468	0	0.0113174	20	./Project_wg_result1778042654_GSEA/GO_0048857.png	7	29227;116671;24224;29386;362938;295461;25398	Bcl2;Cacna1a;Cdk5r1;Mecp2;Nfib;Scrib;Sec24b
GO:1990000	amyloid fibril formation	http://amigo.geneontology.org/amigo/term/GO:1990000	0.580991	1.8097	0.00221729	0.0118557	22	./Project_wg_result1778042654_GSEA/GO_1990000.png	13	361310;309629;25308;29219;296121;685607;246240;24223;29578;301227;24854;25639;25728	Apoe;B2m;Clu;Cstb;Fkbp1a;Hnrnpa1;Pfdn1;Pfdn2;Pfdn6;Ripk3;Snca;Trem2;Usp8
GO:0030856	regulation of epithelial cell differentiation	http://amigo.geneontology.org/amigo/term/GO:0030856	-0.421596	-1.79756	0	0.0119188	105	./Project_wg_result1778042654_GSEA/GO_0030856.png	38	25537;497811;295062;84351;89803;298184;312299;497979;257634;305679;25273;308478;687031;297480;81613;353305;25164;305539;56819;362264;25126;293992;313729;444983;116670;84010;287871;64188;406162;298894;24654;502886;24205;299284;25496;161452;65131;60357	Ajap1;Apc;Apold1;Cdkn2b;Ceacam1;Cldn5;Dicer1;Dll1;Errfi1;Extl3;Ezh2;Foxj2;Foxp1;Ikbkb;Lef1;Lhx1;Mafg;Mycn;Notch1;Notch4;Pax2;Plcb1;Ppp1r12a;Prom1;Rock2;Rptor;Sfrp4;Smo;Spred2;Spred3;Srsf6;Stat5b;Tbx3;Tmem100;Vcl;Wwtr1;Xdh;Zdhhc21
GO:0072521	purine-containing compound metabolic process	http://amigo.geneontology.org/amigo/term/GO:0072521	0.347549	1.7877	0	0.0141746	324	./Project_wg_result1778042654_GSEA/GO_0072521.png	98	361071;171087;24479;246248;363061;289950;24383;288584;25353;298596;117596;24644;289217;297998;301458;24551;25368;298942;25604;100359982;157074;24642;303179;296488;303272;299857;499330;140946;29416;311422;293130;171408;114096;81814;298203;100360180;191575;289934;114114;690660;367214;26759;117260;29443;25650;305506;83782;114597;65142;24468;24534;292915;368190;81727;25014;29560;690344;246233;361068;…	Aadat;Acat1;Acot7;Acsl3;Acsl5;Acss1;Adk;Ahcy;Aldoa;Aprt;Arl2;Atp1b1;Atp6v1b2;Cox11;Dcxr;Dgat1;Dlat;Dld;Dnajc30;Dnm1l;Eif6;Esrrb;Fhit;Fis1;Flcn;Fmo5;G6pd;Galt;Gapdh;Git1;Gmpr;Guk1;Hif1a;Hint1;Hsd11b1;Hsd17b4;Hspa8;Idh1;Idh3a;Itpa;Ldhb;Macrod1;Mccc2;Mdh1;Mdh2;Mpc1;Mpc2;Mvd;Mvk;Ndufc2;Ndufs1;Nme1;Nme2;Nmrk1;Nudt1;Nudt18;Nudt2;Nudt3;Nudt9;Oard1;Ola1;Opa1;Oxsm;Paics;Pcmt1;Pdhb;Pdk3;Pfkm;Pgam1;Pgd;Pgk1…
GO:0071985	multivesicular body sorting pathway	http://amigo.geneontology.org/amigo/term/GO:0071985	0.560738	1.78339	0.0043956	0.0142144	24	./Project_wg_result1778042654_GSEA/GO_0071985.png	11	681059;287873;360698;679886;282834;290635;297995;116643;50645;365191;287645	Chmp2a;Chmp3;Chmp4bl1;Chmp5;Chmp6;Mvb12a;Rab27a;Snf8;Tmem50b;Vcp;Vps25
GO:0048638	regulation of developmental growth	http://amigo.geneontology.org/amigo/term/GO:0048638	-0.367387	-1.76566	0	0.0152609	268	./Project_wg_result1778042654_GSEA/GO_0048638.png	87	29755;25235;25273;308458;25595;24883;81646;313413;24482;24208;170899;50687;297480;307833;296789;84022;84027;312667;293042;362160;25360;29745;29480;116839;114612;29254;84609;64553;25718;170911;89843;116663;286896;246249;25446;691317;29456;29238;56718;59320;24224;64547;315530;25126;361324;64622;171355;690516;171119;29613;140933;65047;84010;84556;308265;29744;246262;29386;303206;24318;681740;309650;…	Adcy10;Adnp;Afdn;Agrn;Akap6;Ankrd26;Apc;Ar;Arhgap32;Arhgap4;Atrn;Bcl2;Bcl2l11;Cacna1c;Cacna2d2;Celf1;Colq;Cpne5;Creb1;Cxadr;Cxcl12;Ddx39b;Dip2b;Disc1;Dll1;Draxin;Drd2;Drd3;Dscam;Dusp6;Efna5;Erbb4;Fosl2;Foxp1;Ghr;Ghsr;Gsk3b;Igf1;Igf1r;Ist1;Jarid2;Kcnk2;L1cam;Lats1;Lrp1;Macf1;Map1b;Map2;Map3k13;Mecp2;Mgll;Mtor;Ncam1;Notch1;Ntrk3;Pik3ca;Plcb1;Plxna3;Pou4f2;Ptprs;Rai1;Rgs4;Rims1;Rims2;Sema3d;Sema3e;S…
GO:0042391	regulation of membrane potential	http://amigo.geneontology.org/amigo/term/GO:0042391	-0.360269	-1.76941	0	0.0152782	359	./Project_wg_result1778042654_GSEA/GO_0042391.png	123	294715;307380;114245;84347;29209;684516;58942;84484;81523;24922;83810;286937;24516;170899;25450;297480;54257;84008;84012;25674;84027;24553;24406;171143;29340;24598;287110;29480;116839;246325;361833;25297;79123;307757;24408;64553;65198;363516;246150;89843;170848;81666;116564;266976;81657;170739;25248;24414;171146;25364;29710;56718;362950;59320;79219;24224;89808;492821;171104;25589;60391;65195;7922…	Abcc9;Abcd1;Adcy10;Adora2a;Afdn;Agrn;Akap6;Akap9;Ank3;Asic1;Asic2;Atxn1;Bcl2;Cacna1a;Cacna1c;Cacna1h;Cacna1i;Cacnb3;Cacnb4;Cacng2;Casq2;Chrnb4;Cnr1;Cntnap1;Crtc1;Cx3cl1;Cxadr;Foxp1;Gabbr1;Gabrb1;Gabrb3;Gimap5;Glra1;Gnaq;Gper1;Gria1;Gria2;Grid1;Grid2;Grik2;Grik3;Grik4;Grik5;Grin1;Grin2a;Grin2b;Grin2c;Grin2d;Grm1;Grm5;Gsk3b;Hcn1;Hcn3;Hcn4;Jun;Kcnb1;Kcnc4;Kcnd3;Kcnh1;Kcnh5;Kcnh6;Kcnh7;Kcnh8;Kcnj5;Kc…
GO:0099177	regulation of trans-synaptic signaling	http://amigo.geneontology.org/amigo/term/GO:0099177	-0.352004	-1.77092	0	0.015503	450	./Project_wg_result1778042654_GSEA/GO_0099177.png	144	25152;84347;58976;366270;684516;83839;58942;304546;64356;81646;24482;50687;25557;54257;679668;84022;84027;29642;24553;24406;29340;24598;24473;252892;287110;641521;29480;116839;81802;170567;106146145;24417;25297;79123;307757;29254;24408;24679;25718;29647;65198;25675;25017;170848;29546;298771;114489;266976;81657;25248;24414;116477;24416;29456;361845;29238;306782;56718;25050;64030;79219;25075;140729…	Adgrb1;Adnp;Adora2a;Afdn;Agrn;Asic1;Baiap3;Cacna1a;Cacna2d2;Cacnb3;Cacnb4;Cacng2;Cacng5;Cacng8;Calb1;Camk2a;Camk4;Cask;Cdh2;Clstn2;Cnr1;Creb1;Crtc1;Cyth1;Dag1;Dcc;Disc1;Dlgap2;Drd2;Drd3;Edn3;Eif4ebp2;Erbb4;Gabbr1;Ghsr;Git2;Gper1;Gria1;Gria2;Grid1;Grid2;Grik2;Grik3;Grik4;Grik5;Grin1;Grin2a;Grin2b;Grin2c;Grin2d;Grm1;Grm3;Grm4;Grm5;Gsk3b;Hcn4;Hmgcr;Homer1;Htr1a;Htr1b;Igf1;Igf1r;Itpr3;Jph4;Kcnb1;Kcnc…
GO:0044282	small molecule catabolic process	http://amigo.geneontology.org/amigo/term/GO:0044282	0.361657	1.76752	0	0.016137	227	./Project_wg_result1778042654_GSEA/GO_0044282.png	89	24383;25721;78959;24398;24644;171133;290401;100145871;63864;25244;298942;79131;117287;294973;24513;25502;297332;64313;25659;24158;24439;303272;299857;541589;29416;362474;300726;29603;361465;64304;171408;24788;100360180;63938;311844;684314;26759;117260;29443;25541;29534;290947;171155;25014;305291;295458;192268;25287;361884;294292;293504;362706;29711;363285;298003;301384;690163;301517;79244;681913;…	Aadat;Aasdhppt;Aass;Abcd2;Acaa1b;Acad9;Acadl;Acadm;Acads;Acat1;Acat2;Acot7;Acox3;Adh5;Adhfe1;Ahcy;Akr1a1;Akt1;Aldh6a1;Apobec2;Asrgl1;Bckdha;Bckdhb;Bckdk;Bdh2;Cyp27a1;Dbt;Dcxr;Dld;Dlst;Echdc1;Ehhadh;Eno1;Esd;Etfa;Etfb;Fabp3;Galm;Galt;Gapdh;Gcsh;Gls;Gls2;Glud1;Glyctk;Gnpda2;Got1;Got2;Gstz1;Hadhb;Hagh;Hibadh;Hibch;Hsd17b10;Hsd17b4;Il4i1;Ivd;Khk;Kyat1;Kyat3;Ldha;Mccc2;Mtrr;Nudt1;Nudt3;Oat;Oaz1;Otc;Ox…
GO:0072001	renal system development	http://amigo.geneontology.org/amigo/term/GO:0072001	-0.362025	-1.74144	0	0.0178496	266	./Project_wg_result1778042654_GSEA/GO_0072001.png	94	306636;171287;25236;303218;60445;29302;246331;64043;316539;140670;353252;25473;192109;295062;24629;498328;310550;305012;292155;266610;312299;290655;25585;257634;24715;311163;25273;83839;24883;84484;360665;304947;116676;312495;81812;287715;311886;116548;363286;140588;313228;84046;286896;25454;362515;362918;24706;24224;25313;365468;64547;289229;58946;113970;24311;56761;691857;50554;293992;305918;28…	Acvr2b;Aldh1a2;Ampd2;Anks6;Anpep;Ap2b1;Apaf1;Apc;Bcl2;Bcl2l11;Calb1;Cd34;Cntrl;Col4a1;Crlf1;Ctnnd1;Cyp26b1;Dchs1;Dchs2;Ddc;Dll1;Dync2h1;Efnb2;Egf;Epha4;Epha7;Erbb4;Ezh2;Fadd;Fbn1;Gcnt1;Gfra1;Gli3;Gpc3;Gpr4;Hmgcs2;Hs2st1;Hs3st3b1;Id3;Ift88;Invs;Itgb3;Jmjd6;Kcnj8;Kif26b;Lamb2;Lef1;Lgr4;Lhx1;Lrp2;Lzts2;Magi2;Mtss1;Nf1;Notch1;Notch3;Nrp1;Pax2;Pbx1;Pcsk5;Pdgfrb;Pecam1;Pkd2;Podxl;Pou3f3;Prom1;Ptpro;Pyg…
GO:0043491	phosphatidylinositol 3-kinase/protein kinase B signal transduction	http://amigo.geneontology.org/amigo/term/GO:0043491	-0.374846	-1.74167	0	0.0182479	199	./Project_wg_result1778042654_GSEA/GO_0043491.png	61	81523;24482;59265;65037;685781;296789;81613;65218;84027;366492;25285;25097;500572;361632;25718;60630;170911;59326;59319;114489;25467;116699;56819;60664;29238;306782;56718;114089;25313;113970;89808;171104;25589;60391;691842;293992;313729;301737;296603;29613;306508;24716;192126;29491;25054;24318;192253;310207;24718;94338;59323;497010;362096;24855;24596;24592;316009;289021;29216;89804;24772	Agap2;Ambra1;Ceacam1;Cx3cl1;Cxcl12;Dab2ip;Dag1;Ddr2;Drd2;Drd3;Egf;Eng;Epha2;Erbb4;Errfi1;Extl3;Fer;Gper1;Gsk3b;Igf1;Igf1r;Igfbp5;Inpp4b;Inpp5e;Irs1;Itsn1;Kdr;Lrp2;Magi2;Maz;Mertk;Mfhas1;Mtor;Myo16;Myoc;Nf1;Ngfr;Nrxn1;Ntrk2;Ntrk3;Otud3;Pax2;Phlpp1;Pik3c2a;Pik3c2b;Pik3ca;Pik3r3;Pld2;Plxnb1;Rapgef3;Reln;Ret;Ror2;Sema3e;Sema5a;Setx;Smpd3;Tek;Tsc2;Unc5b;Vav2
GO:0001945	lymph vessel development	http://amigo.geneontology.org/amigo/term/GO:0001945	-0.558628	-1.74447	0.0147874	0.0182824	24	./Project_wg_result1778042654_GSEA/GO_0001945.png	8	366492;116564;689710;25589;287129;311723;25366;89806	Acvr2b;Epha2;Heg1;Kdr;Npr2;Sox18;Tie1;Tmem204
GO:0007205	protein kinase C-activating G protein-coupled receptor signaling pathway	http://amigo.geneontology.org/amigo/term/GO:0007205	-0.611562	-1.73544	0.0104348	0.0185661	17	./Project_wg_result1778042654_GSEA/GO_0007205.png	5	25075;140866;25369;24418;299858	Adora2a;Dgka;Grm5;Htr1b;Lrp1
GO:0007169	transmembrane receptor protein tyrosine kinase signaling pathway	http://amigo.geneontology.org/amigo/term/GO:0007169	-0.345573	-1.72813	0	0.0192225	394	./Project_wg_result1778042654_GSEA/GO_0007169.png	113	24482;498898;24208;301513;25700;366205;65037;296478;292673;685781;309429;81613;84022;84027;363058;24553;84358;312667;171136;315761;58853;363457;366492;25285;312275;89817;25718;170911;117255;294809;296372;116671;286896;292658;58920;116564;25467;291936;292735;100363275;116636;59295;60664;84382;114203;361845;306782;64030;25313;306009;140942;58946;171104;25136;25589;60391;289353;25126;361324;94202;43…	Adam17;Adamts12;Adgra2;Afap1l2;Alk;Ankrd26;Anks1a;Apc;Ar;Atxn1;Cadm1;Cblb;Cdk5r1;Ceacam1;Cilp;Cnot9;Col4a1;Col4a5;Cspg4;Dab2ip;Ddit4;Ddr2;Dll1;Dok6;Efna2;Efna5;Egf;Eif4ebp1;Eif4ebp2;Epha2;Ephb6;Erbb4;Ercc1;Ercc2;Errfi1;Fer;Flrt1;Flrt3;Foxo1;Gfra2;Ghsr;Gigyf1;Gpc1;Gper1;Gsk3b;Hhip;Ide;Ift88;Igf1;Igf1r;Igfbp5;Irs1;Itga1;Kank1;Kdr;Kit;Lrig2;Lrp1;Mertk;Met;Ncoa5;Ndst1;Ngfr;Npr2;Nr4a3;Nrg2;Nrp2;Nrxn1;…
GO:0070646	protein modification by small protein removal	http://amigo.geneontology.org/amigo/term/GO:0070646	0.463059	1.74807	0.00222717	0.0195488	44	./Project_wg_result1778042654_GSEA/GO_0070646.png	19	360915;261736;312710;117287;117039;287367;306257;363599;266606;690660;293705;171329;116643;288447;363283;78973;311567;287734;316794	Atxn7l3;Bap1;Brcc3;Cops2;Cops3;Cops4;Cops7a;Cops8;Gps1;Hint1;Itch;Otub1;Park7;Senp2;Tnip1;Tor1a;Usp15;Uspl1;Vcp
GO:0001667	ameboidal-type cell migration	http://amigo.geneontology.org/amigo/term/GO:0001667	-0.356977	-1.72837	0	0.0195998	312	./Project_wg_result1778042654_GSEA/GO_0001667.png	86	25273;306873;366270;65048;29381;24482;24516;685781;297480;296789;309429;81613;24553;293042;29340;29745;366492;29355;361632;313024;84609;29600;365037;406228;24790;286896;292658;114500;29460;25467;310999;246249;100363275;303604;60664;29715;56718;64030;25313;58946;25589;50554;60427;360840;361324;94202;304299;500464;301737;81527;57027;25159;299145;24716;192126;25227;79558;362931;29744;246262;29386;25…	Abcc9;Acvr1;Acvr1b;Adam17;Adgra2;Adgrb1;Adtrp;Apc;Arhgap4;Arsb;Atp2b4;Cdh2;Ceacam1;Cxcl12;Dab2ip;Ddr2;Dicer1;Dll4;Edn3;Egf;Emp2;Eng;Epb41l4b;Epha2;Erbb4;Ets1;Fat2;Fer;Foxp1;Gata2;Gbx2;Igf1;Irs1;Jun;Kank1;Kdr;Kit;Kitlg;Krt2;Macf1;Map3k3;Mecp2;Met;Mtor;Nf1;Nos3;Notch1;Nrp2;Pecam1;Pik3c2a;Pik3r3;Pkn1;Plcg1;Plekhg5;Prkce;Prkd2;Ptprr;Radil;Ret;Rhoj;Robo1;Rreb1;Sash1;Scarb1;Sema3d;Sema3e;Sema3g;Sema4b;…
GO:0061351	neural precursor cell proliferation	http://amigo.geneontology.org/amigo/term/GO:0061351	-0.389339	-1.72193	0	0.0196138	146	./Project_wg_result1778042654_GSEA/GO_0061351.png	39	310635;29227;140588;294515;80841;304495;362783;170820;114500;291936;363288;24706;25313;89808;305918;25744;29613;25159;116665;84482;114122;58968;24318;311332;83501;360761;50938;24596;360801;24592;309207;25613;26955;307940;287476;29216;25496;161452;59312	Acan;Afdn;Arhgef2;Cdh2;Cdon;Cx3cl1;Dagla;Disc1;Dll4;Drd2;Egf;Eml1;Fabp7;Foxo1;Foxo3;Gata2;Gbx2;Gli3;Hhip;Ift88;Kdm2b;Kif1a;Lef1;Lnx2;Lrp2;Ncor2;Nf1;Nf2;Nfib;Ngfr;Notch1;Ntrk3;Prdm4;Ptprz1;Rarb;Rere;Shank3;Vcan;Zzef1
GO:0006520	amino acid metabolic process	http://amigo.geneontology.org/amigo/term/GO:0006520	0.368107	1.74119	0	0.019622	167	./Project_wg_result1778042654_GSEA/GO_0006520.png	83	24368;25721;24398;171133;63864;25244;298942;117287;25604;24513;25502;297332;64313;303272;299857;541589;29416;362474;300726;29603;63938;311844;29443;29739;294239;290947;25014;192268;287877;361884;29711;364064;363285;79255;116568;301384;362672;363291;29270;681913;24401;64192;25283;25611;29611;313429;24399;360821;81708;24609;687008;619440;116593;301544;246307;292759;307491;300328;296925;24848;498226…	Aadat;Aarsd1;Aasdhppt;Aass;Acat1;Adhfe1;Ahcy;Aldh1a1;Aldh6a1;Asns;Asrgl1;Atf4;Bckdha;Bckdhb;Bckdk;Bhmt;Comt;Ctps2;Dars2;Dbt;Ddah2;Dld;Dlst;Etfa;Etfb;Fars2;Farsb;Fh;Gart;Gatc;Gclc;Gclm;Gcsh;Ggt1;Ggt5;Gls;Gls2;Glud1;Got1;Got2;Gstz1;Hars2;Hibadh;Hibch;Hsd17b10;Il4i1;Ivd;Kyat1;Kyat3;Lrrc47;Mccc1;Mccc2;Mpst;Mri1;Mtrr;Nit2;Oat;Oaz1;Odc1;Otc;Park7;Pars2;Pcca;Pcmt1;Phgdh;Pipox;Pm20d1;Psph;Pycr1;Pycr2;Qdp…
GO:0043062	extracellular structure organization	http://amigo.geneontology.org/amigo/term/GO:0043062	-0.372222	-1.71383	0.00168634	0.0196922	177	./Project_wg_result1778042654_GSEA/GO_0043062.png	50	309306;25043;85490;29755;102554393;308787;24883;307801;66015;314655;317470;685781;25412;29134;363457;366474;83513;291848;114501;294809;688673;114489;298683;311827;293004;50554;360904;298069;25654;304960;65205;292734;295144;58968;554172;308415;288583;303021;300474;94338;497010;117036;361228;25567;24592;24356;89806;290905;25496;365691	Acan;Adamts10;Adamts12;Adamts13;Adamts15;Adamts17;Adamts4;Adamtsl2;Adamtsl3;Adtrp;Axin2;Col11a1;Col15a1;Col16a1;Col2a1;Col4a1;Col4a5;Col5a1;Colq;Dag1;Ddr2;Egfl6;Egflam;Eln;Eng;Ercc2;Ets1;Gfod2;Idua;Lamc1;Lmx1b;Ltbp4;Mmp15;Mmp16;Mmp24;Nf1;Notch1;Olfml2b;Plod3;Pomt2;Pxdn;Ric1;Rxfp1;Sh3pxd2b;Smad4;Smpd3;Tie1;Tnr;Vwa1;Wt1
GO:0045229	external encapsulating structure organization	http://amigo.geneontology.org/amigo/term/GO:0045229	-0.372222	-1.71383	0.00168634	0.0196922	177	./Project_wg_result1778042654_GSEA/GO_0045229.png	50	309306;25043;85490;29755;102554393;308787;24883;307801;66015;314655;317470;685781;25412;29134;363457;366474;83513;291848;114501;294809;688673;114489;298683;311827;293004;50554;360904;298069;25654;304960;65205;292734;295144;58968;554172;308415;288583;303021;300474;94338;497010;117036;361228;25567;24592;24356;89806;290905;25496;365691	Acan;Adamts10;Adamts12;Adamts13;Adamts15;Adamts17;Adamts4;Adamtsl2;Adamtsl3;Adtrp;Axin2;Col11a1;Col15a1;Col16a1;Col2a1;Col4a1;Col4a5;Col5a1;Colq;Dag1;Ddr2;Egfl6;Egflam;Eln;Eng;Ercc2;Ets1;Gfod2;Idua;Lamc1;Lmx1b;Ltbp4;Mmp15;Mmp16;Mmp24;Nf1;Notch1;Olfml2b;Plod3;Pomt2;Pxdn;Ric1;Rxfp1;Sh3pxd2b;Smad4;Smpd3;Tie1;Tnr;Vwa1;Wt1
GO:0040013	negative regulation of locomotion	http://amigo.geneontology.org/amigo/term/GO:0040013	-0.370057	-1.72359	0	0.0197446	209	./Project_wg_result1778042654_GSEA/GO_0040013.png	54	296789;309429;84022;84027;293042;29745;25285;84609;294515;29600;84397;499518;78969;114489;246249;64021;25418;24224;58946;113970;89808;360840;361324;502020;94202;25559;314903;192126;65047;362931;29744;58968;246262;29386;24318;363517;310207;311332;500287;309280;497010;24654;366980;24596;296374;361228;24592;26955;290562;89806;25496;299858;24772;65131	Abcc8;Acan;Adgrb1;Adtrp;Afdn;Arhgap4;Arid2;Atp2b4;Bcl2;Ccdc125;Cldn5;Cx3cl1;Cxcl12;Dab2ip;Dag1;Dll4;Dpysl3;Drd2;Eng;Foxo3;Ghsr;Gpr173;Gsk3b;Igfbp5;Kank1;Lrch1;Lrp1;Magi2;Mecp2;Nf1;Ngfr;Notch1;Plcb1;Plxna3;Plxnb3;Ptprr;Robo1;Sema3d;Sema3e;Sema3g;Sema4b;Sema4f;Sema5a;Sema6a;Sema6b;Sema6c;Slit1;Srgap1;Srgap2;Srgap3;Tie1;Tnfaip6;Trib1;Zmynd8
GO:0090596	sensory organ morphogenesis	http://amigo.geneontology.org/amigo/term/GO:0090596	-0.377008	-1.71756	0	0.0198089	179	./Project_wg_result1778042654_GSEA/GO_0090596.png	60	499749;24919;310838;365748;117955;365901;24215;685072;24338;257634;85490;315840;293996;362237;83839;25412;313255;84358;312495;25360;353305;317674;58853;366492;140588;84046;304495;24790;312574;313713;114500;501699;306782;24706;24224;289229;25589;293992;171119;25159;25654;84010;25550;25054;360652;83727;309860;84390;362938;303811;295461;50938;192183;24592;171068;25496;191571;94272;83720;60357	Atp2b2;Bcar3;Bcl2;Bhlhe22;Calb1;Casz1;Cdon;Clic5;Col11a1;Col2a1;Col5a1;Cyp26b1;Dll1;Dscam;Dvl3;Efna2;Epha2;Ephb1;Fat1;Fat3;Fbn1;Fzd5;Gata2;Gbx2;Gli3;Gnat2;Hcn1;Kdm2b;Kdr;Lhx1;Lrig1;Myo15a;Myo6;Nectin1;Nf1;Notch1;Nr4a3;Ntrk2;Pax2;Pdzd7;Pou2f1;Prom1;Rarb;Rarg;Ror2;Scrib;Sdk2;Sec24b;Slc1a1;Slc4a7;Sobp;Sox11;Sp1;Tbc1d20;Tbx3;Tprn;Tshr;Vangl2;Whrn;Yy1
GO:0055086	nucleobase-containing small molecule metabolic process	http://amigo.geneontology.org/amigo/term/GO:0055086	0.331928	1.74379	0	0.0198609	382	./Project_wg_result1778042654_GSEA/GO_0055086.png	149	361071;171087;24479;246248;363061;298410;289950;24383;288584;298596;117596;24644;289217;297998;301458;24551;25368;298942;296394;117287;25604;100359982;157074;24642;303179;296488;303272;299857;499330;140946;29416;311422;102238592;293130;171408;114096;81814;298203;100360180;191575;289934;114114;690660;367214;26759;117260;29443;25650;305506;300089;83782;114597;361056;65142;24468;24534;292915;299346;…	Aadat;Aass;Acat1;Acot4;Acot7;Acsl1;Acsl3;Acsl5;Acss1;Adk;Ahcy;Ak6;Aldh6a1;Aldoa;Aldoc;Apobec2;Aprt;Arl2;Atic;Atp1b1;Atp6v1b2;Bad;Bcl2l1;Bpgm;Cmpk1;Comt;Cox11;Ctps2;Cyb5r4;Dctpp1;Dcxr;Dgat1;Dlat;Dld;Dlst;Dnajc30;Dnm1l;Dpm1;Dut;Eif6;Eno1;Esrrb;Fhit;Fis1;Flcn;Fmo2;Fmo5;G6pd;Galt;Gapdh;Gart;Git1;Gmpr;Gmpr2;Gnpda2;Gpi;Guk1;Hif1a;Hint1;Hsd11b1;Hsd17b4;Hspa8;Idh1;Idh3a;Itpa;Kcnab2;Ldha;Ldhb;Macrod1;Map2…
GO:1902414	protein localization to cell junction	http://amigo.geneontology.org/amigo/term/GO:1902414	-0.405859	-1.70863	0	0.0201983	104	./Project_wg_result1778042654_GSEA/GO_1902414.png	43	266777;140724;314906;64355;305679;84009;353230;25152;84347;679668;84022;84027;252892;81802;307757;24408;81822;29546;114489;171571;25364;116595;689710;113970;117284;60391;117096;24409;310519;171297;24411;116508;26295;24718;25400;59323;362938;192183;294917;26955;78957;56768;29583	Actb;Afdn;Asic2;Cacng2;Cacng3;Camk2a;Dag1;Erbb4;Ghsr;Grin1;Grin2a;Grin2c;Grip2;Gsk3b;Heg1;Homer1;Kalrn;Kif5a;LRRTM1;Lgi1;Lhfpl4;Lrrc7;Lsr;Magi2;Map1a;Nectin1;Neto2;Nlgn2;Nlgn3;Nptx1;Nrxn1;Nrxn2;Nrxn3;Ogt;Pclo;Pecam1;Reln;Scrib;Shank1;Slitrk3;Stx3;Tnik;Vcl
GO:0006814	sodium ion transport	http://amigo.geneontology.org/amigo/term/GO:0006814	-0.380221	-1.70506	0	0.0206005	142	./Project_wg_result1778042654_GSEA/GO_0006814.png	55	84351;25349;498328;245956;117955;78956;24211;114245;308458;84484;171148;170573;117100;63882;29642;171143;24598;287715;170567;289459;361833;59329;79123;192215;311651;170848;689576;116477;29715;25364;29710;85267;364029;306811;24766;59266;287422;497770;25665;79212;24318;24782;25122;56827;246215;84390;29502;192208;29665;114862;140447;29464;315311;24600;25592	Agrn;Ank3;Asic1;Asic2;Asic4;Atp1a1;Cacna1h;Cacna1i;Drd2;Hcn1;Hcn3;Hcn4;Ikbkb;Kcnq2;Nkain3;Nos1;Nos3;P2rx7;Per1;Pkd2;Scn2a;Scn2b;Scn3a;Scn3b;Scn5a;Scn8a;Scn9a;Scnn1a;Sik1;Slc10a6;Slc20a2;Slc24a3;Slc38a1;Slc38a2;Slc38a4;Slc38a5;Slc4a4;Slc4a7;Slc4a8;Slc6a1;Slc6a5;Slc6a6;Slc6a7;Slc8a1;Slc8a2;Slc9a1;Slc9a5;Slc9a8;Slc9c2;Sptbn4;Tpcn1;Trpm4;Wnk1;Wnk2;Wnk4
GO:0043276	anoikis	http://amigo.geneontology.org/amigo/term/GO:0043276	-0.550476	-1.69563	0.010101	0.0207013	21	./Project_wg_result1778042654_GSEA/GO_0043276.png	15	114212;309295;246142;25614;25554;60571;313121;83805;59329;170911;24224;89813;25054;24855;25496	Bcl2;Bmf;Chek2;Ikbkg;Map3k7;Mybbp1a;Notch1;Ntrk2;Pdk4;Pik3ca;Ptk2;Sik1;Snai2;Src;Tsc2
GO:0021953	central nervous system neuron differentiation	http://amigo.geneontology.org/amigo/term/GO:0021953	-0.384091	-1.69874	0	0.0207794	125	./Project_wg_result1778042654_GSEA/GO_0021953.png	40	25273;308458;25595;25450;299117;296789;24553;140610;362160;29227;499362;140588;114501;81666;114500;691317;313507;312108;60391;79220;83825;81527;25159;286895;25054;24318;286993;65209;311332;309280;310533;315771;310698;25311;362573;299284;361103;307940;25398;59312	Brinp1;Brinp2;Cacna1a;Celf1;Dcc;Dclk1;Dclk2;Dicer1;Disc1;Dll4;Draxin;Drd2;Dync2h1;Gabrb1;Gata2;Gbx2;Gli3;Gnaq;Grid2;Herc1;Lbx1;Lmx1b;Map2;Met;Nfib;Nin;Nrp2;Nrxn1;Ntrk2;Ophn1;Plxna3;Rapgef2;Sema3e;Shank3;Smo;Sptbn4;Szt2;Tal1;Taok1;Zmiz1
GO:0019098	reproductive behavior	http://amigo.geneontology.org/amigo/term/GO:0019098	-0.474196	-1.7018	0.00375235	0.0209048	46	./Project_wg_result1778042654_GSEA/GO_0019098.png	22	24165;50557;171574;84686;295327;29335;25265;81632;84009;24922;24208;65170;140610;81812;29263;24408;81666;25248;84390;83724;363287;25601	Abat;Acvr2a;Ada;Ar;Brinp1;Cnr1;Dnm3;Gabrb3;Gnaq;Grin1;Hcn1;Hdac4;Kalrn;Ncoa2;Nhlh2;Oprk1;Oprm1;P2ry1;Ppp1r9b;Pten;Scamp4;Thra
GO:0010975	regulation of neuron projection development	http://amigo.geneontology.org/amigo/term/GO:0010975	-0.339764	-1.69613	0	0.020907	405	./Project_wg_result1778042654_GSEA/GO_0010975.png	112	50687;266611;287545;685781;307833;299117;296789;309429;84027;24553;293042;306147;29745;287110;301309;24408;65201;84609;25718;29647;365511;117016;116671;56029;25248;295695;246249;691317;29456;314473;363288;25418;306782;56718;59320;58946;113970;117284;89808;60328;289392;361450;79220;315530;84685;361324;64622;171355;690516;171119;316085;303313;57027;64532;29613;85248;24716;140933;192126;65047;25227;…	Adam17;Adcy10;Adcy5;Adgrb3;Adnp;Afdn;Agrn;Alk;Arhgap32;Arhgap4;Arsb;Cacna1a;Camsap2;Cask;Cdh2;Cdk5r1;Cit;Clip1;Cnr1;Crtc1;Cspg4;Cx3cl1;Cxcl12;Dab1;Dab2ip;Dcc;Ddr2;Dip2b;Disc1;Dpysl3;Draxin;Dscam;Efna5;Enc1;Fat3;Grid2;Grin1;Gsk3b;Igf1r;Ist1;Kank1;Kidins220;Kif1a;Kif26a;Kif3c;L1cam;Lrig2;Lrp1;Lrrc7;Lzts3;Macf1;Magi2;Map1b;Map3k13;Mark1;Mark2;Met;Mtor;Nf1;Ngfr;Nin;Nlgn3;Ntrk2;Ntrk3;Plxna2;Plxna3;Plx…
GO:0043954	cellular component maintenance	http://amigo.geneontology.org/amigo/term/GO:0043954	-0.436347	-1.69892	0.00170358	0.0210756	65	./Project_wg_result1778042654_GSEA/GO_0043954.png	22	369016;84008;313255;363058;116839;301309;24408;25718;29546;295695;362918;113970;312108;84556;689074;296374;26955;85275;24410;78957;56768;59312	Adgrb3;Afdn;Cadm1;Camsap3;Cntnap1;Grin1;Grin2b;Homer1;Igf1r;Magi2;Mpp2;Mtss1;Myadm;Ophn1;Pclo;Rims1;Rims2;Shank1;Shank3;Whrn;Zfp804a;Zmynd8
GO:0016050	vesicle organization	http://amigo.geneontology.org/amigo/term/GO:0016050	0.353502	1.72313	0	0.0224241	231	./Project_wg_result1778042654_GSEA/GO_0016050.png	89	299159;116664;297566;25216;289046;297797;58857;83615;287276;117596;116638;116657;292925;83841;65033;59074;299971;64310;310710;308717;302526;29528;436582;171050;58842;287873;295217;286758;498415;288779;302671;81830;85491;64154;60431;308061;100361891;679886;297900;65134;25012;308869;25624;116561;116563;29448;360571;641528;282834;368044;362699;114554;303183;689377;361207;64152;500282;64194;81778;171…	Aktip;Ap1s2;Ap2m1;Aqp11;Arf1;Arfgap2;Arfgap3;Arl8b;Atp6ap1;Atp6ap2;Atp6v0e2;Atp6v1b2;Atp6v1c1;Atp6v1d;Atp6v1e1;Atp6v1f;Atp6v1g2;Atp6v1h;Bet1;Bloc1s4;Cadps;Chmp3;Chmp4bl1;Chmp5;Chmp6;Chp1;Clcn3;Cltb;Coro1a;Cplx1;Cplx2;Dtnbp1;Gosr2;Gpr143;Insig1;Kif5b;Lamtor1;Mob4;Pafah1b1;Pdcd6;Pef1;Pi4k2a;Pik3c3;Preb;Rab11a;Rab14;Rab1a;Rab20;Rab27a;Rab29;Rab34;Rab3a;Rab5al1;Rab5b;Rab7a;S100a10;Sar1b;Sdc1;Sdcbp;Se…
GO:0045664	regulation of neuron differentiation	http://amigo.geneontology.org/amigo/term/GO:0045664	-0.372173	-1.6829	0	0.0231652	147	./Project_wg_result1778042654_GSEA/GO_0045664.png	37	84027;140610;310635;24916;499362;140588;294515;84046;313713;315689;29456;84382;56718;24224;56761;29458;171355;307594;25159;24716;140933;84010;313539;304109;266729;286895;298894;116658;50938;24596;266802;303823;24592;299284;24183;25496;24772	Ak1;Alk;Arhgef2;Bcl2;Brinp1;Brinp2;Casz1;Cdon;Cntn4;Cxcl12;Dab1;Dicer1;Dll1;Foxo3;Gata2;Gli3;Gsk3b;Hmg20a;Kdm4a;Lbx1;Map1b;Map3k13;Mib1;Mtor;Mycn;Neurod1;Nf1;Ngfr;Notch1;Notch3;Pou4f2;Ret;Rnf112;Sox11;Tcf4;Tiam1;Trpc5
GO:0051180	vitamin transport	http://amigo.geneontology.org/amigo/term/GO:0051180	-0.502342	-1.67877	0.00544465	0.0234175	31	./Project_wg_result1778042654_GSEA/GO_0051180.png	6	116721;312382;311536;25073;29216;24778	Abcc5;Abcg2;Lrp2;Scarb1;Slc2a1;Slc52a3
GO:0007188	adenylate cyclase-modulating G protein-coupled receptor signaling pathway	http://amigo.geneontology.org/amigo/term/GO:0007188	-0.376835	-1.68084	0	0.0234524	156	./Project_wg_result1778042654_GSEA/GO_0007188.png	67	25029;56813;192153;25740;25026;25289;25083;24626;25323;170641;81672;25638;29302;29335;25387;54305;25265;81752;365901;171447;64672;29256;302950;25024;25555;53949;81636;24598;24473;25360;29555;116839;301309;24417;29600;25637;81666;81657;25248;24414;83633;24416;29238;289180;25075;171104;313058;50664;24167;64532;295144;362931;59075;24247;25369;24318;81779;298521;308408;310533;293024;24418;81743;65096…	Adcy2;Adcy5;Adcy6;Adcy9;Adcyap1r1;Adgrb1;Adgrb2;Adgrb3;Adgrf5;Adgrl1;Adgrl2;Adgrl3;Adgrl4;Adm;Adora2a;Adra2a;Akap13;Arrb1;Atp2b4;Calcrl;Casr;Chrm5;Cnr1;Drd2;Drd3;Gabbr1;Gabbr2;Gipr;Gnao1;Gnaq;Gnat2;Gnaz;Gper1;Gpr161;Gpr26;Gpr4;Grik3;Grk5;Grm1;Grm3;Grm4;Grm5;Grm7;Htr1a;Htr1b;Htr1d;Itgb3;Nos1;Oprk1;Oprl1;Oprm1;P2ry1;Pde2a;Pde4a;Pde4b;Pln;Ptger1;Ptger2;Pth1r;Rapgef2;Rims2;Rxfp1;Sctr;Sstr2;Sstr4;Tshr…
GO:0031647	regulation of protein stability	http://amigo.geneontology.org/amigo/term/GO:0031647	0.355808	1.71315	0	0.0239055	192	./Project_wg_result1778042654_GSEA/GO_0031647.png	66	81763;25498;25390;29258;29282;299809;24383;362631;84389;373541;24686;294864;288305;494345;289034;65033;117287;290408;502017;297994;301442;25479;316348;64665;287155;29374;114766;114562;25650;83765;690038;24468;83823;64367;29534;192275;305963;295230;311130;64152;685620;24944;58823;63868;301252;29219;84578;140941;361171;296121;25328;293886;361501;361957;310399;362414;78973;362453;315000;25599;299331…	Atp1b1;Atp1b3;Bag1;Bag2;Camlg;Ccnh;Cct2;Cct3;Cct4;Cct5;Cct8;Cd74;Cdc37;Cdc37l1;Chp1;Crebl2;Dad1;Dpm3;Flot1;Gapdh;Get4;Gipc1;Golga7;Hdac3;Hsp90aa1;Hsp90ab1;Hspa8;Hspd1;Isoc2b;Lamp1;Lamp2;Mfsd1;Naa15;Nckap1;Npm1;Park7;Pdcd10;Pdcl3;Pex2;Phb2;Pinx1;Ppib;Prkra;Prnp;Ptges3;Rab21;Rnf139;Rpl11;Rpl23;Rpl5;Rps7;Rtn4;Senp2;Siah1;Snca;Stub1;Stx12;Stxbp1;Sugt1;Sumo1;Tada3;Taf9;Tmem183a;Tomm7;Usp8;Vps35
GO:0006605	protein targeting	http://amigo.geneontology.org/amigo/term/GO:0006605	0.356835	1.70965	0	0.023947	184	./Project_wg_result1778042654_GSEA/GO_0006605.png	72	293551;288584;362631;64198;363289;24686;266601;140908;300075;288770;690345;29431;293621;64464;286758;282827;290370;679907;83533;363707;312559;291685;85491;29635;24468;363253;79463;83823;287535;84383;54312;56011;298914;81732;29448;252928;79563;29885;50686;54311;300111;25183;293142;64152;29290;171139;685620;116650;81784;24944;50658;65248;29753;63868;361171;304017;312903;25578;246772;308416;311621;3…	Actr3;Adora1;Aifm1;Aip;Aqp11;Arl6ip1;Cdk5;Chchd4;Chp1;Dnajc15;Fis1;Gcc2;Gdi1;Get4;Gipc1;Golga7;Grpel1;Gsk3a;Hras;Hsp90aa1;Hspa4;Hspa8;Hspd1;Itgb1bp1;Lamp2;Mapk9;Mterf4;Naca;Pak1;Pam16;Pex5;Pmpcb;Prkaa1;Prnp;Rab3ip;Rab7a;Rpl11;Samm50;Sgtb;Snx16;Spcs2;Srp19;Srp54a;Srp68;Srp9;Srprb;Ssr3;Timm10;Timm13;Timm17a;Timm21;Timm22;Timm23;Timm44;Timm8a1;Timm9;Tomm20;Tomm22;Tomm34;Tomm40;Tomm7;Tomm70;Tram1;Trm…
GO:0072348	sulfur compound transport	http://amigo.geneontology.org/amigo/term/GO:0072348	-0.502467	-1.6698	0.00772201	0.0251573	34	./Project_wg_result1778042654_GSEA/GO_0072348.png	17	366909;289175;114629;29482;310392;306866;301010;155205;363516;54315;25550;287532;50719;312382;305131;29464;289443	Abcd1;Abcg2;Lrrc8c;Lrrc8d;Slc19a2;Slc1a1;Slc1a2;Slc26a10;Slc26a3;Slc26a6;Slc35b3;Slc36a1;Slc43a2;Slc6a6;Slc7a11;Slc7a5;Ucp2
GO:0007588	excretion	http://amigo.geneontology.org/amigo/term/GO:0007588	-0.569929	-1.66307	0.0207547	0.0253773	19	./Project_wg_result1778042654_GSEA/GO_0007588.png	5	83731;24318;312382;24239;25103	Abcg2;Cacna1c;Chrnb4;Drd2;Kcnma1
GO:0002065	columnar/cuboidal epithelial cell differentiation	http://amigo.geneontology.org/amigo/term/GO:0002065	-0.415161	-1.66392	0.00719424	0.0254933	80	./Project_wg_result1778042654_GSEA/GO_0002065.png	25	685072;83805;25273;304334;297480;317674;29227;500057;84046;29456;315617;24706;60447;29458;50671;83731;25159;84010;287871;361700;83501;26955;299284;25496;161452	Afdn;Cdh2;Clock;Dicer1;Dll1;Fam20c;Fasn;Foxp1;Fzd5;Gata2;Kcnma1;Kdm2a;Lef1;Map1b;Neurod1;Nfib;Notch1;Rarb;Rarg;Rptor;Sidt2;Smo;Sox11;Src;Zfp800
GO:0002009	morphogenesis of an epithelium	http://amigo.geneontology.org/amigo/term/GO:0002009	-0.335035	-1.6607	0	0.0255029	345	./Project_wg_result1778042654_GSEA/GO_0002009.png	92	311163;25273;306873;24883;315745;304947;25429;24482;24208;366205;687031;362772;297480;296789;116676;81613;24553;353305;317674;287715;366492;25285;499362;367242;363286;140588;25718;81822;84046;304495;294809;365352;114500;114489;81521;291936;56718;362918;24224;25313;365468;289229;58946;312108;64865;25589;50554;116640;293992;286994;57027;307594;303519;500863;100361323;24716;84010;79558;313845;689074…	Actb;Acvr1;Adam17;Adamts12;Ajap1;Aldh1a2;Apaf1;Ar;Astn2;Bcl2;Btbd7;C2cd3;Camsap3;Casr;Ceacam1;Cecr2;Col4a1;Ctnnd1;Cxcl12;Cyp7b1;Dag1;Dchs1;Dicer1;Dll1;Dll4;Dvl3;Egf;Eng;Epha2;Erbb4;Fat1;Fem1b;Flrt3;Foxp1;Fzd5;Gbx2;Gli3;Hhip;Igf1;Igf1r;Igfbp5;Kdm2a;Kdm2b;Kdr;Krt25;Lamc1;Lbx1;Lef1;Lgr4;Lrp2;Lzts2;Met;Mib1;Mical2;Msn;Mtor;Mtss1;Mycn;Myo9a;Ngfr;Notch1;Notch4;Ophn1;Pax2;Pbx1;Pcdh8;Plod3;Podxl;Rab23;Re…
GO:0030048	actin filament-based movement	http://amigo.geneontology.org/amigo/term/GO:0030048	-0.406368	-1.66521	0	0.0256486	85	./Project_wg_result1778042654_GSEA/GO_0030048.png	32	25349;245956;24211;54262;64672;315840;29209;497974;497892;171143;24598;29557;313024;64553;170911;246150;25017;117057;24627;501699;59320;65195;59266;29713;25665;25472;24782;114862;360468;24239;25560;689560	Abcc9;Adcy10;Akap6;Akap9;Atp1a1;Cacna1c;Cacna1h;Casq2;Emp2;Hcn4;Kcnd3;Kcnj5;Kcnj8;Kcnn2;Myh7;Myo15a;Myo19;Myo1b;Myo5a;Myo6;Nos1;Pde4d;Pik3ca;Pln;Ryr2;Scn2b;Scn3b;Scn5a;Sgcd;Slc9a1;Trpm4;Wasf2
GO:0044331	cell-cell adhesion mediated by cadherin	http://amigo.geneontology.org/amigo/term/GO:0044331	-0.508137	-1.65711	0.0116054	0.0256934	29	./Project_wg_result1778042654_GSEA/GO_0044331.png	9	25409;83513;498515;301737;406162;83501;29182;26955;25496	Afdn;Cdh2;Cdh22;Cdh24;Cdh6;Fer;Mmp24;Notch1;Notch4
GO:0035329	hippo signaling	http://amigo.geneontology.org/amigo/term/GO:0035329	-0.518207	-1.65549	0.0165441	0.025695	25	./Project_wg_result1778042654_GSEA/GO_0035329.png	12	305922;309945;366352;171093;295062;83805;84046;361655;25744;308265;83620;308912	Arrdc3;Cit;Dchs1;Lats1;Lats2;Mob3b;Nf2;Shank2;Sox11;Src;Tial1;Wwtr1
GO:0006979	response to oxidative stress	http://amigo.geneontology.org/amigo/term/GO:0006979	0.331345	1.69836	0	0.0259057	337	./Project_wg_result1778042654_GSEA/GO_0006979.png	93	64045;29328;246294;24479;315167;113898;140654;84480;25216;24426;296851;54318;289218;24686;24787;116484;25307;494345;79116;117254;282819;310738;79462;29338;362245;117287;305348;64371;25309;287069;25737;64460;308051;79107;192218;25622;83427;117520;58950;66028;266606;65179;29425;83533;312559;114022;29542;84485;24673;83782;79239;24468;29534;24786;29739;170520;156275;24440;29560;287877;114087;360630;3…	Agap3;Aifm1;Apex1;Arl6ip5;Atf4;Banf1;Becn1;Bnip3;Ccs;Cfl1;Chchd4;Chrna4;Crk;Cst3;Cycs;Cygb;Duox2;Eif2s1;Fkbp1b;G6pd;Gclc;Gclm;Ggt1;Ggt7;Glrx;Glrx2;Gpx1;Gpx4;Gpx7;Gstp1;Hbb;Hif1a;Hmox2;Hspa8;Hspd1;Idh1;Kat5;Lias;Map1lc3a;Map2k4;Mapk9;Msra;Msrb2;Naglu;Ndufa6;Ndufs2;Nfe2l2;Ngf;Nme2;Optn;Oser1;Oxr1;Park7;Pcna;Pdcd10;Pebp1;Pex14;Pex2;Pnpt1;Pon2;Ppif;Ppp2cb;Ppp5c;Prdx1;Prdx2;Prdx3;Prdx4;Prdx5;Prkaa1;Pr…
GO:0045216	cell-cell junction organization	http://amigo.geneontology.org/amigo/term/GO:0045216	-0.378344	-1.65742	0	0.0259931	131	./Project_wg_result1778042654_GSEA/GO_0045216.png	45	24170;29650;81516;25554;81918;303798;501083;25237;306636;316539;25537;84351;64355;83805;305679;311163;369016;84008;81613;313255;84470;317674;366492;25409;81822;89843;362918;689710;498515;25559;25744;301737;116690;689074;29365;83501;287424;29182;192183;50677;26955;266706;29583;300519;65131	Abcc8;Actb;Acvrl1;Adam10;Add1;Afdn;Aloxe3;Arvcf;Camsap3;Cdh2;Cdh22;Cdh24;Cdh6;Ceacam1;Cldn5;Cntnap1;Ctnnd1;Cxadr;Efnb2;Epha2;Epha4;Esam;Fer;Fzd5;Gjc1;Gnpat;Heg1;Ikbkb;Lsr;Mpdz;Mtss1;Myadm;Nectin1;Nf2;Nfasc;Pard3;Pdcd6ip;Pecam1;Ptpro;Rock2;Smad7;Snai2;Src;Vcl;Whrn
GO:0035966	response to topologically incorrect protein	http://amigo.geneontology.org/amigo/term/GO:0035966	0.400634	1.68214	0.00222717	0.0289732	84	./Project_wg_result1778042654_GSEA/GO_0035966.png	34	246294;289874;54318;287155;24908;266606;60431;192351;65165;54287;79255;25304;80881;63868;301252;83619;116643;300955;113906;312903;373544;361014;313115;171071;360967;303016;680945;305120;29884;362912;117063;297968;291000;63880	Akirin2;Atf4;Bok;Comp;Crebrf;Derl1;Dnajb9;Dnajc3;Eif2ak2;Eif2s1;Erlec1;Ermp1;Faf2;Fbxo6;Hsp90ab1;Hspb8;Hspd1;Nck1;Nfe2l2;Ngly1;Optn;Ppp1r15a;Ptpn2;Rnf185;Rpap2;Sdf2l1;Serp1;Stub1;Tmed2;Tor1a;Tram1;Ufl1;Vapb;Vcp
GO:0003014	renal system process	http://amigo.geneontology.org/amigo/term/GO:0003014	-0.402238	-1.63896	0	0.0293195	84	./Project_wg_result1778042654_GSEA/GO_0003014.png	22	25117;287715;116548;29355;170816;301113;314332;24224;113970;83731;300768;25369;24318;81779;312382;360468;24239;25103;305081;50677;192181;245977	Abcg2;Adgrf5;Adora2a;Bcl2;Cacna1c;Cd34;Chrnb4;Coro2b;Drd2;Emp2;Hsd11b2;Kcnma1;Magi2;Olr59;Pcsk5;Pkn1;Podxl;Ptpro;Sctr;Slc25a23;Tmem63c;Wnk4
GO:0019693	ribose phosphate metabolic process	http://amigo.geneontology.org/amigo/term/GO:0019693	0.330326	1.66479	0	0.0329725	270	./Project_wg_result1778042654_GSEA/GO_0019693.png	80	361071;171087;363061;298410;289950;24383;288584;298596;117596;24644;289217;297998;301458;25368;298942;100359982;157074;24642;303179;296488;303272;140946;29416;311422;293130;81814;298203;191575;289934;114114;690660;26759;25650;305506;83782;114597;361056;65142;24468;292915;299346;368190;81727;25014;29560;690344;361068;361884;84509;373545;294292;114024;296849;81726;299210;246771;298003;85428;29562;1…	Aadat;Acat1;Acot7;Acsl3;Acsl5;Acss1;Adk;Aldoa;Aprt;Arl2;Atp1b1;Atp6v1b2;Cmpk1;Cox11;Dgat1;Dlat;Dld;Dnajc30;Dnm1l;Eif6;Esrrb;Fis1;Flcn;G6pd;Galt;Gapdh;Git1;Guk1;Hif1a;Hint1;Hsd17b4;Hspa8;Itpa;Mccc2;Mpc1;Mpc2;Mvd;Mvk;Ndufc2;Ndufs1;Nme1;Nme2;Nudt14;Nudt18;Nudt2;Nudt3;Nudt9;Ola1;Opa1;Oxsm;Paics;Pdhb;Pdk3;Pfkm;Pgam1;Pgk1;Pipox;Pkm;Prkaa1;Prkag2;Prps1;Ran;Rhoq;Rnaseh2b;Sdha;Sdhb;Sdhc;Sdhd;Slc25a25;Slc4…
GO:0060485	mesenchyme development	http://amigo.geneontology.org/amigo/term/GO:0060485	-0.348175	-1.62022	0	0.0333605	195	./Project_wg_result1778042654_GSEA/GO_0060485.png	67	266772;500262;246331;316539;301346;353252;25537;295062;24629;498328;310630;690139;312299;497979;361764;25273;366270;24883;308478;296789;498576;116676;84027;29134;293042;29745;353305;84609;117016;114500;114489;305539;303946;56718;24224;58946;50554;83837;60427;361324;64896;293992;304299;81527;300673;24716;192126;79558;304109;29744;246262;406162;310207;59323;83501;497010;304798;360468;24855;24586;24…	Acvr1;Aldh1a2;Axin2;Bambi;Bcl2;Bcl9l;Cdh2;Dab2ip;Dag1;Dchs1;Dicer1;Edn3;Emp2;Eng;Epha4;Erbb4;Ezh2;Gbx2;Gsk3b;Il17rd;Kbtbd8;Kitlg;Klhl12;Lef1;Mark1;Mdm4;Mtor;Ncam1;Nolc1;Nos3;Notch1;Notch4;Nrp1;Nrp2;Pax2;Pdgfrb;Pkd2;Radil;Rbm24;Rdh10;Ret;Robo1;Rock2;Sema3d;Sema3e;Sema3g;Sema4a;Sema4b;Sema4c;Sema4f;Sema4g;Sema5a;Sema6a;Sema6b;Sema6c;Slc39a10;Smad4;Smo;Spred2;Spred3;Tbx3;Tiam1;Tmem100;Tsc2;Usf3;Wt1;…
GO:0043279	response to alkaloid	http://amigo.geneontology.org/amigo/term/GO:0043279	-0.373522	-1.62438	0.00176678	0.0333951	127	./Project_wg_result1778042654_GSEA/GO_0043279.png	42	29209;287834;100360880;83810;24482;25557;59106;29340;24598;29480;24379;117523;24408;291439;25718;29546;25467;25248;29715;29238;56718;24224;25075;24311;24380;24409;50592;25550;304109;59075;25757;79212;29386;25369;24318;25743;24586;24410;25601;689560;312936;444984	Adora2a;Bcl2;Casq2;Cnr1;Cpt1a;Ddc;Dnmt3a;Drd2;Drd3;Fosb;Gad1;Gad2;Gria1;Grin1;Grin2a;Grin2b;Grk5;Homer1;Htr1b;Igf1;Igf1r;Irs1;Kcnj6;Ltbp2;Mbd1;Mecp2;Mtor;Ncam1;Nos1;Oprm1;Prkce;Recql5;Rgs4;Ryr2;Slc1a1;Slc6a1;Slc8a1;Sox17;St8sia2;Star;Tiam1;Trpv1
GO:0009581	detection of external stimulus	http://amigo.geneontology.org/amigo/term/GO:0009581	-0.410827	-1.62136	0.00540541	0.0334178	73	./Project_wg_result1778042654_GSEA/GO_0009581.png	29	116489;498328;365901;78956;24215;24338;293996;307380;58942;83810;24482;54257;313255;83513;25297;304195;192223;25364;64030;24409;25654;252880;310207;361430;24412;24596;24410;307940;24772	Asic2;Atp2b2;Cacnb3;Cacnb4;Col11a1;Cxcl12;Disc1;Drgx;Ephb1;Gnat2;Grik2;Grin2a;Grin2b;Grin2d;Igf1;Kcnk4;Kit;Mmp24;Ngfr;Opn4;Pcp2;Pdzd7;Piezo1;Piezo2;Pkd2;Scn9a;Sema5a;Trpv1;Whrn
GO:0009582	detection of abiotic stimulus	http://amigo.geneontology.org/amigo/term/GO:0009582	-0.410827	-1.62136	0.00540541	0.0334178	73	./Project_wg_result1778042654_GSEA/GO_0009582.png	29	116489;498328;365901;78956;24215;24338;293996;307380;58942;83810;24482;54257;313255;83513;25297;304195;192223;25364;64030;24409;25654;252880;310207;361430;24412;24596;24410;307940;24772	Asic2;Atp2b2;Cacnb3;Cacnb4;Col11a1;Cxcl12;Disc1;Drgx;Ephb1;Gnat2;Grik2;Grin2a;Grin2b;Grin2d;Igf1;Kcnk4;Kit;Mmp24;Ngfr;Opn4;Pcp2;Pdzd7;Piezo1;Piezo2;Pkd2;Scn9a;Sema5a;Trpv1;Whrn
GO:0031589	cell-substrate adhesion	http://amigo.geneontology.org/amigo/term/GO:0031589	-0.339249	-1.61041	0	0.0360726	232	./Project_wg_result1778042654_GSEA/GO_0031589.png	63	83805;24338;302248;689069;305679;25676;306873;65048;81523;50687;687031;65037;317470;369016;363554;296789;309429;84027;54308;29340;81008;366474;116548;29647;25356;294809;56029;114489;29460;315686;24224;64547;25589;362973;311862;360840;304299;301737;25528;304109;300768;689074;25118;313339;313490;291610;306941;116683;117036;360468;311647;305081;24592;25613;299284;307940;89804;25496;299858;362587;365…	Acer2;Adamts12;Ajap1;Bcl2;Bcl2l11;Camsap3;Carmil1;Cask;Cd34;Cntn2;Col16a1;Coro2b;Dag1;Dicer1;Disc1;Efna5;Egfl6;Egflam;Emp2;Ephb1;Fat2;Fer;Gsk3b;Itga1;Itga7;Kank1;Kdr;L1cam;Lamc1;Lamc3;Lrp1;Macf1;Mertk;Mslnl;Myadm;Myoc;Nf1;Nid2;Notch1;Parvb;Parvg;Pcsk5;Peak1;Pecam1;Prex1;Prkce;Ptprz1;Radil;Rasa1;Rreb1;Sema3e;Sirpa;Slk;Spry4;Src;Srcin1;Srgap2;Tek;Tesk1;Thsd1;Tiam1;Tmem8b;Vcl
GO:0071826	protein-RNA complex organization	http://amigo.geneontology.org/amigo/term/GO:0071826	0.366873	1.64936	0.00233645	0.0369338	129	./Project_wg_result1778042654_GSEA/GO_0071826.png	52	122799;299872;297699;29284;373541;298700;65160;499391;299027;100312984;363646;301463;682390;689284;364430;113958;246216;81773;83789;305506;290647;299899;94266;292536;29285;362952;293427;302500;311130;296753;681031;171041;687711;108348073;298075;301252;116643;361808;291794;364995;291877;304323;292898;288516;29236;362967;171365;117550;306960;299331;362809;681429	Abt1;Clns1a;Ddx28;Eif2s3;Eif2s3y;Eif3b;Eif3d;Eif3e;Eif3f;Eif3g;Eif3h;Eif3i;Eif5;Eif6;Eral1;Fastkd2;Gemin7;Hsp90aa1;Hsp90ab1;Kif5b;Klc1;Lsm4;Mcts1;Mrm2;Mrps7;Ncbp1;Nudt21;Nufip1;Pih1d1;Prkra;Prpf19;Prpf31;Ptges3;Rpl38;Rps10;Rps14;Rps15;Rps2;Rps25;Rps27;Rps27l;Rpsa;Rrp7a;Snrpb;Snrpc;Snrpd1;Snrpd3;Snrpg;Srpk2;Strap;Taf9;Vcp
GO:0034248	regulation of amide metabolic process	http://amigo.geneontology.org/amigo/term/GO:0034248	0.329113	1.64592	0	0.0370761	279	./Project_wg_result1778042654_GSEA/GO_0034248.png	77	81763;25498;499782;29288;299872;117017;363232;140654;287444;29284;24383;140661;58856;54318;299938;100362640;81764;304012;24686;361196;64530;124323;287069;24642;688288;690345;60421;301463;299857;361309;689284;117045;83427;361805;498000;100364335;310261;293056;64640;305506;293408;315550;83765;65165;499191;54287;362819;313867;297082;81727;304928;29681;24440;307503;50686;171439;362952;295284;296849;5…	Atf4;Bzw1;Bzw2;C1qbp;Cnbp;Coa3;Cpeb1;Ddx25;Eif2ak2;Eif2s1;Eif3d;Eif3e;Eif4a3;Eif4e;Eif5;Eif5a;Eif5a2;Eif6;Etf1;Fastkd2;Fxr1;Gapdh;Gsk3a;Habp4;Hbb;Hbs1l;Hsd11b1;LOC100364335;Lrpprc;Magoh;Malsu1;Mettl18;Mettl8;Mrpl13;Mvk;Ncbp1;Nck1;Nfe2l2;Ngrn;Npm1;Paip2;Pdk3;Pgam1;Pkm;Polr2g;Prkaa1;Prmt1;Prnp;Rack1;Rbm3;Rbm8a;Rcc1l;Rpl10;Rpl12;Rpl30;Rpl38;Rpl5;Rplp1;Rps14;Rps23;Rps3;Rps3a;Rps4x;Rpusd4;Rtn3;Rtn4;S1…
GO:0001763	morphogenesis of a branching structure	http://amigo.geneontology.org/amigo/term/GO:0001763	-0.355557	-1.60515	0	0.0372221	161	./Project_wg_result1778042654_GSEA/GO_0001763.png	43	25273;24883;315745;304947;24482;24208;362772;296789;24553;353305;317674;366492;140588;114500;114489;291936;24224;25313;289229;25589;50554;116640;293992;286994;500863;116665;79558;24247;29386;24318;406162;310207;311332;298894;497010;303823;299284;89806;290905;308912;25496;161452;24772	Acvr1;Ar;Bcl2;Btbd7;Casr;Col4a1;Cxcl12;Dag1;Dchs1;Dicer1;Dll4;Drd2;Egf;Eng;Epha2;Fem1b;Fzd5;Gbx2;Gli3;Hhip;Igf1;Kdr;Lef1;Lgr4;Map3k13;Mecp2;Met;Mycn;Notch1;Notch4;Pax2;Pbx1;Rere;Rspo2;Sema3e;Sema5a;Smad4;Smo;Tbx3;Tie1;Tnc;Vangl2;Wt1
GO:0045165	cell fate commitment	http://amigo.geneontology.org/amigo/term/GO:0045165	-0.362849	-1.59834	0.00357143	0.0379392	144	./Project_wg_result1778042654_GSEA/GO_0045165.png	42	25273;361531;24883;24208;116668;312495;293165;353305;310635;29227;499362;140588;170820;313713;306782;56718;24224;313507;56761;25589;50554;282582;29458;293992;29613;25159;289026;84010;79558;308265;25671;59328;303021;311723;311332;59323;499874;50938;24205;29452;312936;25496	Acvr1;Apc;Ar;Arhgef2;Bcl2;Casz1;Cdon;Cyp26b1;Dll1;Dll4;Epas1;Erbb4;Gata2;Gli3;Kdr;Lats1;Lbx1;Mga;Mtor;Myt1l;Neurod1;Nfib;Notch1;Notch3;Ntrk3;Paf1;Pax2;Prdm4;Ror2;Sh3pxd2b;Smad1;Smad4;Smad5;Smo;Sox13;Sox17;Sox18;Sox6;Tal1;Tbx3;Wnt5b;Wt1
GO:0090130	tissue migration	http://amigo.geneontology.org/amigo/term/GO:0090130	-0.340329	-1.59852	0	0.0383681	226	./Project_wg_result1778042654_GSEA/GO_0090130.png	55	65048;24482;24516;297480;309429;81613;24553;29340;366492;29355;361632;29600;365037;406228;24790;292658;29460;25467;310999;100363275;303604;60664;56718;64030;25313;58946;25589;50554;60427;94202;500464;57027;25159;299145;192126;25227;362931;29386;25738;310207;311723;311332;360468;361228;25073;24205;24592;24356;24600;299284;89804;25496;362587;29583;24772	Adam17;Adgra2;Adgrb1;Adtrp;Apc;Arsb;Atp2b4;Ceacam1;Cxcl12;Dab2ip;Dicer1;Dll4;Egf;Emp2;Epb41l4b;Epha2;Ets1;Fat2;Foxp1;Gata2;Igf1;Irs1;Jun;Kank1;Kdr;Kit;Kitlg;Krt2;Macf1;Map3k3;Mecp2;Met;Mtor;Nf1;Nos3;Notch1;Pecam1;Pik3c2a;Pik3r3;Pkn1;Plcg1;Plekhg5;Prkce;Prkd2;Ptprr;Rhoj;Robo1;Sash1;Scarb1;Sema5a;Smad4;Sox18;Sp1;Tek;Tesk1
GO:0050954	sensory perception of mechanical stimulus	http://amigo.geneontology.org/amigo/term/GO:0050954	-0.370481	-1.59974	0.0034662	0.0384874	122	./Project_wg_result1778042654_GSEA/GO_0050954.png	50	25387;302711;114589;29483;499749;116489;117955;78956;24215;308797;353230;315840;293996;307380;25152;56227;308458;83810;24482;25412;313255;25297;312574;170848;116564;501699;25364;29710;64030;25609;288022;171355;83731;24409;25654;252880;308523;29682;316400;309860;117106;24412;311536;498189;310753;84573;24410;29216;24772;94272	Arrb1;Asic2;Atp2b2;Cacnb3;Ccdc50;Cemip;Clic5;Cntn5;Col11a1;Col2a1;Cxcl12;Drgx;Espn;Grin2a;Grin2b;Grin2d;Igf1;Kcnk4;Kcnma1;Kcnq2;Kcnq3;Kit;Lhfpl4;Lrig1;Lrig2;Lrp2;Map1a;Myo15a;Myo6;Npr2;Otof;Pdzd7;Pgap1;Piezo2;Pou4f2;Scarb2;Scn8a;Scn9a;Slc1a3;Slc4a7;Slc52a3;Sobp;Sptbn4;Srrm4;Tbl1x;Tprn;Trpv1;Tshz3;Tub;Whrn
GO:0044057	regulation of system process	http://amigo.geneontology.org/amigo/term/GO:0044057	-0.320503	-1.59463	0	0.0387554	405	./Project_wg_result1778042654_GSEA/GO_0044057.png	126	114099;298184;81752;170945;64510;24211;54262;64672;81632;497979;83805;60337;24715;25668;24504;29209;366270;308458;684516;83810;286937;24482;688915;297480;54257;25674;84022;84027;171143;24598;81812;24473;287110;29480;287715;58853;116839;29557;25285;114612;25297;307757;170816;29254;29263;24408;294515;64553;29600;25675;246150;89843;288908;24627;114489;24414;116477;171409;29715;25364;56718;362950;593…	Abat;Abcc8;Abcc9;Abcg2;Acvr2a;Adcy10;Afdn;Agrn;Akap6;Akap9;Asic2;Atp1a1;Atp2b1;Atp2b4;Cacna1c;Cacna1h;Cacnb3;Casq2;Casr;Cc2d1a;Cd38;Chrna2;Chrnb4;Cmya5;Coro2b;Cx3cl1;Cxadr;Cysltr1;Dag1;Ddx39b;Dicer1;Drd2;Edn3;Emp2;Epas1;Errfi1;Foxo1;Foxo3;Foxp1;Ghsr;Gjc1;Glra1;Gnao1;Gper1;Grik2;Grin1;Grin2a;Grin2b;Grin2c;Grin2d;Grm1;Gsk3b;Hcn4;Hdac4;Hmgcr;Htr1a;Igf1;Igfbp5;Inha;Jarid2;Kcnc4;Kcnd3;Kcnh6;Kcnj5;Kcnj…
GO:0150115	cell-substrate junction organization	http://amigo.geneontology.org/amigo/term/GO:0150115	-0.404609	-1.58244	0.00516351	0.0430702	66	./Project_wg_result1778042654_GSEA/GO_0150115.png	25	311860;25237;301363;60445;29302;246331;25513;100363276;83805;305679;81523;54308;366474;313494;315686;24224;25589;300768;689074;116683;117036;89804;299858;362587;364630	Abl1;Acvrl1;Arhgap6;Bcl2;Camsap3;Col16a1;Coro2b;Efna5;Itgb3;Kdr;Lamc1;Lrp1;Macf1;Map4k4;Myoc;Nrp1;Peak1;Pik3r1;Slk;Src;Tek;Thsd1;Tln1;Tsc1;Vcl
GO:0034976	response to endoplasmic reticulum stress	http://amigo.geneontology.org/amigo/term/GO:0034976	0.343388	1.62182	0	0.0434775	171	./Project_wg_result1778042654_GSEA/GO_0034976.png	66	289874;288584;54318;140657;310738;117287;140639;365797;445268;64665;287155;286758;24908;266606;83533;114114;60431;24673;192351;65165;54287;298370;29144;79255;499157;289211;80881;58851;171116;303606;114590;83619;116643;300955;25290;362301;685859;360426;373544;361014;313115;25506;308871;171071;360967;362751;315000;499751;289196;680945;298689;305120;288518;303567;29884;689593;362912;29565;117063;291…	Aifm1;Alox5;Aqp11;Atf4;Bcl2l1;Bok;Canx;Ccdc47;Derl1;Dnajb2;Dnajb9;Dnajc3;Dnm1l;Eef2;Eif2ak2;Eif2s1;Erlec1;Ermp1;Faf1;Faf2;Fbxo6;Fcgr2b;Fis1;Flot1;Get4;Grina;Hnrnpa1;Man1b1;Nck1;Nfe2l2;Ngf;Ngly1;Nploc4;Nr1h2;Nrbf2;Opa1;P4hb;Park7;Pla2g6;Ppp1r15a;Ppp2cb;Ptpn2;Rnf121;Rnf139;Rnf185;Rpap2;Sdf2l1;Serp1;Stub1;Svip;Tmco1;Tmed2;Tmub1;Tmub2;Tmx1;Tor1a;Txndc12;Uba5;Ube2j2;Ubqln1;Ubxn2a;Ufc1;Ufl1;Ufm1;Vapb;V…
GO:1901873	regulation of post-translational protein modification	http://amigo.geneontology.org/amigo/term/GO:1901873	0.35153	1.62456	0	0.043777	158	./Project_wg_result1778042654_GSEA/GO_1901873.png	68	81763;25498;140654;362631;116725;287927;291609;310738;140908;117287;287155;246146;58974;65028;296468;363599;690244;290556;308061;690038;116722;289508;361089;192255;64367;297900;305963;29560;363836;50686;64152;24230;50658;114590;301252;25283;84578;116643;29591;303185;83477;310194;362827;117089;685859;60371;24185;25337;313115;299691;361831;78973;311567;299331;306141;81715;689593;362912;29155;89820;…	Akt1;Atg7;Bag2;Bcl10;Bex2;Bex3;Birc2;Birc7;Camlg;Capn3;Cdk5;Chp1;Cry1;Dcun1d5;Derl1;Dnaja1;Dnajb2;Flcn;Gabarap;Gclc;Gnl3;Gsk3a;Hdac3;Hif1a;Hsp90aa1;Hsp90ab1;Hspbp1;Itch;Kat8;Mapk9;Ndfip1;Ndfip2;Nfyc;Ngf;Npm1;Park7;Pdcd6;Pef1;Phf23;Pias4;Pinx1;Ppib;Prmt3;Psmd10;Rchy1;Rpl11;Rpl5;Rps3;Rwdd3;Senp2;Spry2;Sqstm1;Stub1;Sumo2;Tgfbr1;Tnip1;Tspo;Ubb;Ube2d1;Ube2l3;Ube2n;Ube2s;Ube2v2;Ubqln1;Ubxn2a;Ufl1;Vcp;X…
GO:0070050	neuron cellular homeostasis	http://amigo.geneontology.org/amigo/term/GO:0070050	0.417519	1.61643	0.004662	0.0442967	60	./Project_wg_result1778042654_GSEA/GO_0070050.png	15	299159;116664;297566;117556;297797;312444;83615;117596;116638;140908;299971;302526;436582;306257;295217	Atp6ap1;Atp6ap2;Atp6v0e2;Atp6v1b2;Atp6v1c1;Atp6v1d;Atp6v1e1;Atp6v1f;Atp6v1h;Bap1;Cdk5;Immt;Slc17a7;Snapin;Sv2b
GO:0031346	positive regulation of cell projection organization	http://amigo.geneontology.org/amigo/term/GO:0031346	-0.322099	-1.575	0	0.0444575	313	./Project_wg_result1778042654_GSEA/GO_0031346.png	67	25248;295695;29456;25418;306782;56718;59320;64030;58946;113970;117284;89808;60328;289392;315530;84685;64622;171355;690516;171119;305918;316085;303313;57027;29613;85248;24716;140933;192126;25227;304109;25054;25671;363517;310207;306941;116683;24718;309280;117106;310533;303811;294674;362096;116478;29665;303584;360406;24855;24596;296374;266802;303823;24205;24592;25613;363287;684527;26955;25311;316009…	Adam17;Adcy10;Adnp;Afdn;Agrn;Alk;Apc;Arhgap32;Arsb;Carmil1;Cnr1;Crtc1;Cx3cl1;Cxcl12;Dab2ip;Dcc;Disc1;Dpysl3;Dscam;Dvl3;Efna5;Enc1;Hdac4;Ift88;Kidins220;Kif3c;Kit;Lrp1;Lrrc7;Macf1;Magi2;Map1b;Map3k13;Mark2;Mtor;Nf1;Ngfr;Ntrk2;Ntrk3;P2rx7;Plekhm1;Plxna2;Plxna3;Plxnb1;Plxnb3;Pou4f2;Ppp1r9a;Ptprf;Ptprz1;Rapgef2;Reln;Ret;Robo1;Ror2;Scarb2;Scarf1;Sema5a;Setx;Smad1;Smurf1;Tenm2;Tiam1;Trak1;Trpc5;Tsc2;Zf…
GO:0048771	tissue remodeling	http://amigo.geneontology.org/amigo/term/GO:0048771	-0.359962	-1.57715	0	0.0446387	131	./Project_wg_result1778042654_GSEA/GO_0048771.png	45	287537;56813;114587;83534;54259;24873;25155;360863;25237;25341;29302;25537;89803;365901;83805;25043;307973;25668;24482;685781;81613;84027;84358;291567;366492;25285;24250;116564;116699;25446;25075;64576;360904;286994;89813;311332;29665;303584;25366;24592;81651;24600;29452;89806;299858	Abr;Acvr2b;Acvrl1;Cbs;Cd38;Ceacam1;Cspg4;Ddr2;Def8;Dlk1;Dll4;Efna2;Eln;Epas1;Epha2;Fosl2;Gnat2;Gsk3b;Htr1b;Idua;Igf1;Igfbp5;Inpp4b;Inpp5d;Itgb3;Lgr4;Lrp1;Nf1;Nos3;Npr2;P2rx7;Pdk4;Plekhm1;Ppargc1b;Pth1r;Ptprv;Rock2;Sfrp4;Src;Suco;Syk;Tie1;Tnfrsf11b;Tpp1;Vdr
GO:1901657	glycosyl compound metabolic process	http://amigo.geneontology.org/amigo/term/GO:1901657	0.422009	1.60862	0.0114943	0.0448901	46	./Project_wg_result1778042654_GSEA/GO_1901657.png	24	78959;25368;25604;296098;363494;292485;367214;117260;29443;359725;246233;171445;292072;24192;291824;24434;24375;24834;301419;116593;314999;315219;24267;301226	Adk;Ahcy;Akr1a1;Akr1b1;Akr7a2;Apobec2;Aprt;Cbr4;Comt;Fuca1;Fuca2;Gla;Gusb;Lcmt2;Macrod1;Nudt1;Oard1;Pcmt1;Tk1;Tk2;Trmt12;Tymp;Tyw5;Upb1
GO:0071867	response to monoamine	http://amigo.geneontology.org/amigo/term/GO:0071867	-0.398621	-1.57517	0.00766284	0.0449256	66	./Project_wg_result1778042654_GSEA/GO_0071867.png	21	25557;84027;24598;24473;29480;58853;64553;29600;25637;24627;81666;29238;171104;50664;64532;25550;24318;24782;266802;25601;689560	Adcy5;Akap6;Alk;Atp2b4;Drd2;Drd3;Gnao1;Gnaq;Gper1;Gsk3b;Htr1a;Nos1;Nr4a3;Oprm1;Pde4d;Ptger1;Rgs4;Ryr2;Slc1a1;Slc9a1;Star
GO:0006886	intracellular protein transport	http://amigo.geneontology.org/amigo/term/GO:0006886	0.30969	1.60972	0	0.0457832	429	./Project_wg_result1778042654_GSEA/GO_0006886.png	145	289874;299872;65199;83800;54350;83615;287276;681059;116484;494345;266601;140908;65033;59074;117287;25502;64310;140639;64460;365797;288666;300075;301442;64465;65046;308717;81002;25479;56820;58842;64464;306071;25622;295217;64187;114766;288779;300857;312559;302671;81830;171051;304469;360785;29635;308061;65165;293344;24468;363253;79463;100361891;29534;65134;54312;79117;64516;307039;25624;117049;29310…	Agap3;Akt1;Ap1s1;Ap1s2;Ap2m1;Ap2s1;Ap3s2;Ap4s1;Apod;Arf1;Arf2;Arf4;Arf5;Arfip2;Arl1;Arl11;Arl6;Atp6ap1;Cabp1;Cd74;Cdc42;Cdk5;Cfl1;Chchd4;Chp1;Clta;Cltb;Copb1;Copb2;Copg1;Cse1l;Dmap1;Dusp16;Eif3e;Erlec1;Exoc6;Fam91a1;Fgf9;Gcc2;Hdac3;Hikeshi;Hsp90aa1;Hsp90ab1;Hspa4;Hspa8;Il33;Insig1;Kcnip3;Kif20b;Kif5b;Klc1;Lcp1;Ndel1;Nploc4;Nsf;Nxt1;Oaz1;Oaz2;Park7;Pdcd10;Pdcd6;Pex14;Pex2;Pex3;Pex5;Phb2;Ppm1a;Ppp3…
GO:0030902	hindbrain development	http://amigo.geneontology.org/amigo/term/GO:0030902	-0.351479	-1.5693	0.0017452	0.0463108	157	./Project_wg_result1778042654_GSEA/GO_0030902.png	68	25033;311860;304037;308923;295327;360827;308988;303539;79433;301346;54305;311349;117955;140589;312299;24215;81632;24338;257634;499425;25273;24922;24482;116676;313255;84470;29227;308473;24250;24408;25718;114501;304495;116671;114500;362950;24224;25313;84495;312108;60391;289392;79220;300186;315530;303488;29458;50659;25159;116665;84010;25665;266729;29386;499964;25671;25529;83724;362938;192247;295461;…	Abat;Abl1;Ahi1;Ak1;Aldh1a2;Amigo2;Arhgap32;Arl13b;Atp2b2;Atrn;Bcl2;Cacna1a;Cbs;Cdk5r1;Dab1;Dll1;Egf;En2;Ephb1;Ezh2;Gabrb3;Gata2;Gbx2;Gdf10;Gli1;Gnpat;Grid2;Grin1;Herc1;Hoxb3;Igf1;Igf1r;Kat2a;Kdm2b;Lef1;Lhx1;Lmx1b;Mecp2;Myh10;Ncoa2;Ncor2;Neurod1;Nfib;Nhlh2;Nr2c2;Nrxn1;Ophn1;Plxna2;Ptprs;Rbfox2;Rere;Samd4b;Scn5a;Scrib;Sec24b;Sema4c;Sez6;Sez6l2;Slc4a7;Smad1;Smo;Sstr1;Sstr2;Ttbk2;Ulk1;Whrn;Xrcc1;Zfp3…
GO:0048880	sensory system development	http://amigo.geneontology.org/amigo/term/GO:0048880	-0.323001	-1.56586	0.00172117	0.0469336	277	./Project_wg_result1778042654_GSEA/GO_0048880.png	89	688394;314988;363455;246331;79433;353252;25473;24919;24629;310838;365748;117955;365901;24215;685072;100362124;24338;257634;305854;310392;85490;362237;83839;24883;360665;308478;304947;24516;65037;116676;317674;366492;29227;363286;140588;81822;84046;29600;114501;304495;24790;313713;192223;305539;117521;64314;24706;24224;25609;25589;311862;29598;29458;293992;171355;171119;305918;25744;29613;299145;2…	Actb;Acvr2b;Aldh1a2;Apc;Atp2b1;Atp2b2;Atp2b4;Bcar3;Bcl2;Bhlhe22;Cacna1c;Calb1;Casp2;Casz1;Cdon;Chrdl1;Col4a1;Col5a1;Crybg3;Dll1;Dll4;Drd2;Dscam;Epha2;Ephb1;Fat1;Fat3;Fbn1;Fzd5;Gli3;Gnat2;Hcn1;Ift140;Ift88;Jmjd6;Jun;Kdm2b;Kdr;Lamb2;Lamc3;Lhx1;Lmx1b;Lpcat1;Mab21l1;Mertk;Myh10;Nectin1;Neurod1;Nf1;Nf2;Nfib;Nhs;Nos3;Notch1;Nrp1;Ntrk2;Ntrk3;Opn4;Pax2;Pbx1;Pdgfrb;Pknox1;Pou2f1;Pou4f2;Prom1;Pxdn;Rarb;Rar…
GO:0031214	biomineral tissue development	http://amigo.geneontology.org/amigo/term/GO:0031214	-0.366719	-1.56089	0.00358423	0.0482901	106	./Project_wg_result1778042654_GSEA/GO_0031214.png	31	304334;24482;685781;29134;171143;170818;29263;314619;25446;29715;306782;362918;85267;81733;29598;25586;303635;286994;500863;84482;79558;308415;94338;29502;29665;25366;192183;56782;24600;299284;25496	Acvr1;Acvr2a;Acvr2b;Alpl;Atp2b1;Axin2;Ddr2;Dicer1;Ercc2;Fam20a;Fam20c;Fosl2;Foxo1;Icmt;Igf1;Lgr4;Mtss1;Nectin1;Nell1;Nos3;Notch1;P2rx7;Ror2;Rspo2;Sbno2;Slc20a2;Slc24a3;Slc8a1;Smpd3;Srgn;Trpm4
