# Supplementary material
Source: Research Square preprint supplement (doi:10.21203/rs.3.rs-9685636/v1)
Supplement: Supplementary file 6 [file adceb9724234e55387b5416c.xlsx]

## Sheet: Sheet1
Gene ID_D7	Gene ID_D28	Gene ID_Overlapping
Kctd14	Flt1	Abcb1a
Prdx6	Ptprb	Abcc9
Dao	Prom1	Abhd1
Gpcpd1	Fat1	Acap3
Col19a1	Clic5	Aco1
Kifc2	Cep131	Adgre5
Vsir	Fat3	Adgrf5
Nf1x	Arl16	Adgrl4
Plekhd1	Adgrf5	Adk
Acsbg1	LOC310926	Afap1
Dmxl1	Myo10	Ago3
Lrrc8d	Itm2a	Agrn
Pde10a	Abcb1a	Ahdc1
Tial1	Cldn5	Ak1
Ssh3	Cxcl12	Akap13
Fam126b	Birc6	Aloxe3
Cpt2	Esam	Ankrd11
Sacs	Thsd1	Ankrd52
Cstf2	Soga1	Anxa4
Ncan	Nav1	Arfgef3
Nos1ap	Nbeal2	Arhgap39
Dzank1	Dync1h1	Arhgef38
Aif1l	Ubr4	Arl6ip4
Wsb1	Podxl	Arntl
Unc80	Mgat5b	Ash1l
Gria2	Rps20	Astn1
Slc25a36	LOC102555453	Atp10a
Abca5	Rasip1	Atp13a5
Psd2	LOC100911068	Atp5d
Pamr1	Slc2a1	Atp5e
Kcnj16	Csmd2	Atp5l
Rictor	Csmd1	Atp6v1b2
Mapk9	Dnmt3a	Atp6v1c1
Ednrb	Chd1l	Atp6v1e1
Gba2	Ralgps1	Atp6v1h
Vwa5b2	Zfp366	Atrn
Rrbp1	Slco1a2	Atxn2l
Stxbp5	Erg	Auh
LOC102549102	Cyyr1	Baz2b
Igsf9b	Med13l	Bcap31
Tst	Cbfa2t3	Birc6
Abhd4	Pecam1	Bnip3
Ppip5k2	Plxna1	Bpifb4
Crebrf	Adgrl4	Bptf
Dgki	Zfp142	Brwd1
Usp45	Cryz	Bsn
Fgfrl1	Egflam	Cabp7
Pcdhgc3	Atp6v1d	Cacna1a
Actb	Spen	Cacna1b
Strbp	Mical3	Cacna1c
Eno1	Wdfy3	Cacna1d
Marcks	Syne1_1	Cacna1e
Plag1	Glrx5	Cacna1h
Epb41l4b	Rps15a	Cacybp
Atp5e	Shank3	Calm1
Prpf39	Ash1l	Cap1
Celsr3	Macf1	Caskin2
Hadha	Glrx3	Ccdc88a
Fnip1	Lef1	Ccnt2
Aurkc	Ndufb9	Cdh4
Eqtn	Lrp1	Cdk5
Myo10	Hectd4	Cdk5rap2
Idua	Notch1	Cdon
Cyp4f1	Zcchc14	Celsr3
Cacna1d	Kmt2a	Cenpk
LOC102556249	Trrap	Cetn2
Wfdc1	LOC100362819	Chchd3
Snph	Zfhx2	Chd1l
Lsm6	Cldn4	Chd2
Bicd1	Plec	Chd6
Phyh	Agrn	Chd9
Trnl1	Lrp1b	Chrnb4
Mapk8	Tek	Chst3
Tmbim6	Ep300	Cir1
Zcchc7	Glrx	Cldn5
Lyst	Nostrin	Cntnap2
Folh1	Slc7a1	Col5a3
Pkd1	Cnksr2	Cox8a
LOC103691033	Ndufa4	Cplx2
Ankrd12	Srcap	Cpne9
Smo	Dchs1	Crbn
Edn3	Rps25	Crh
Cpeb4	Kdm5b	Crtc1
Pla2g16	Vps13c	Csmd1
Clip4	Sucla2	Csmd2
Tbc1d24	Gjc1	Csmd3
Fabp7	Trnk	Cst3
Gdap1	Trng	Cttnbp2
Gria3	Hspa12b	Cxcl12
Rab30	Utp20	Cyp2j3
Ca5b	Arid1a	Cyp2j4
Rhoc	Sox17	Dchs1
Pygm	Myom3	Ddx17
Serinc5	RGD1306271	Ddx25
Amy1a	Pcdh19	Degs2
Ccnd1	Rpl5	Dennd5b
Tril	Tet3	Dhx34
Gdpd2	Dot1l	Dlgap2
Epas1	Fat4	Dock3
Chst5	Dst	Dock7
Trnk	Brd4	Dot1l
Cyp2j3	Lactb2	Dpm1
Glmn	RGD1561113	Dpy19l3
Zfp483	Syne1	Drp2
Pnisr	Neo1	Dync1h1
Prex1	LOC108349760	Edc4
Per2	Psmb6	Elmsan1
Acaa2	Ostc	Emp2
Miat	Prrc2c	Ep400
Ap3b2	Phip	Epas1
Amhr2	Prp2l1	Epc1
Fut9	Kmt2d	Epg5
RGD1560556	Mdn1	Epha8
S100a16	Col4a1	Erc1
Dnm3	Prr12	Erg
Ackr1	Itga6	Erich3
Nmu	Fkbp3	Erlec1
Zfp423	Rps27a	Esam
Ankrd28	Chd9	F8
Tnfsf13	Tie1	Fabp5
Pld4	Herc2	Fanci
Zranb2	Sorl1	Fat1
Plxnb1	Dlg5	Fgd5
Erp29	Srp14	Flrt1
Tpcn1	Kcnn3	Foxj2
Dock3	Phc3	Fry
Zfp292	Gpx4	Gbe1
Npc2	Myh8	Gdf10
Elovl5	Psma2	Gdpd2
Luc7l3	Ano5	Glrx5
Slc9b2	Kmt2c_1	Gls
Cep97	Cox6c	Glt1d1
Col24a1	Sema3g	Gltscr2
Sepn1	Chd8	Gpr17
Sfswap	Nsd1	Grm5
Inppl1	Raph1	Grsf1
Abcc5	RGD1307100	Gsto1
Alox15	Zfp532	Gtf2f1
Gpr157	Trio	Gyg1
Dtx4	Efhd2	Hars
Fgf14	Ryr2	Hcfc1r1
Suclg2	Gltscr2	Hdac4
Atmin	Ryr3	Herc1
Acad11	Pcp4	Herc2
Rlbp1	Rnf144b	Hivep2
Dynll1	Rgs5	Hsd17b10
Gabarap	2015-09-01	Hspe1
LOC500956	LOC100912002	Htt
Il17rd	Fundc1	Huwe1
Oxct1	Epg5	Ice1
Tbkbp1	Bcorl1	Igsf10
Prpf40b	Slc39a10	Igsf9b
Grin2a	Npm1	Ildr2
LOC685152	Ubn2	Ino80d
Tkt	Kmt2e	Ints6l
Sel1l3	Epas1	Ipo11
Agpat1	Pclo	Irf6
Col9a2	F8	Isca1
Fads2	Usmg5	Itga6
Vhl	Zfp704	Itpr3
Setd5	Rai1	Ivd
Slc25a18	Fam103a1	Jph4
Mcf2l	Hmcn1	Kank3
Cntnap2	LOC108349532	Kcnb2
Mroh7	Cyc1	Kcnip3
Rbm42	Ak1	Kcnk9
Nrep	Thoc7	Kcnn3
Cttnbp2	Zfp827	Khk
Agrn	Car4	Kmt2a
Chpf2	Trnd	Kmt2b
Aqp9	RGD1559731	Kmt2e
LOC100910200	Tenm2	Ksr2
Slc4a8	Kmt2b	LOC100910788
Zfp711	Lrch3	LOC100912002
Dgke	Pcdhgb7	LOC100912557
Ngfr	Rnf44	LOC102546572
Napb	Pkd1	LOC102547266
Miga1	Rpl19	LOC102551251
Neto1	Unc79	LOC102553825
Matn4	Atp5j2	LOC102555453
LOC103690800	Atp5l	LOC103690074
Drp2	Uqcr10	LOC103692951
Nbea	Fry	LOC103694424
Limd1	Cox7b	LOC108349532
Hexb	Optn	LOC108349760
Lman2	Ubald2	LOC108351685
Ksr2	Isca1	LOC108351758
Ptn	Gsto1	LOC108352957
LOC100911253	Ndufa2	LOC301124
Srrm2	Cacna1a	LOC310926
Hddc3	Rpl26	LOC361985
Nf2	Ndufc1	Lcor_1
Pccb	LOC103690962	Lgr6
Clasrp	Ssh2	Lmf2
Epb41	Trnw	Lrig2
Ckb	Tnrc6a	Lrp1b
Ehd1	Atrn	Lrp2
Lcn12	Slc19a3	Lrrc8c
Ttc33	Mpc1	Lrrc8d
LOC306766	Pgp	Lyst
Zhx3	Skp1	Macrod2
Acadvl	Lrp2	Map1lc3a
Pld1	Zzef1	Map3k2
Maob	Col5a3	Mcoln1
Ogdh	LOC102553825	Mdm4
Mmp15	Ppia	Mdn1
Laptm5	Tbca	Mea1
Kcnt1	LOC100912557	Med13l
Hivep2	Sdk1	Med14
Eml5	Erlec1	Mga
Fads1	Pan3	Mgat5b
Sfxn4	Shroom4	Mical3
Fam120a	Stard9	Mllt1
Uqcr11	Mpdu1	Mpc2
Col4a3bp	Dynlt3	Mpzl1
Marcksl1	Pole3	Mrpl12
Orc4	Trappc1	Mrpl16
Tsc1	Huwe1	Mrps36
Tet3	LOC301124	Mxra7
Yipf3	Rpl3	Mycbp2_1
Inpp4a	Cacna1g	Myh8
Csmd3	Pnpo	Myo10
Pmel	Disc1	Myom3
Thoc1	Arl6ip1	NEWGENE_1305560
Dpy19l3	Igsf9b	Napg
Fancm	Psmd6	Nbeal2
Slc8a1	Hdhd2	Ncam1
Tmem86b	Bsn	Ncoa2
Tgfb2	Pfdn1	Ncor2
Slc20a2	Atp5c1	Ndst1
Clic4	Ndufv2	Ndufa10l1
Aqp4	Uqcrh	Ndufa4
Aldh7a1	Cox7a2	Ndufb4
Sgcg	Trnl1	Ndufs5
Hsd17b12	Ttc28	Neo1
Sfxn5	Arhgap21	Neurod6
Kcnj10	Rpl12	Nf1
Rhpn2	Dynlrb1	Nfatc2
Myt1l	Prrc2a	Ngf
Dag1	Eif3m	Ngfr
Ucp2	Atp6v1f	Nid1
Acap3	Eef1a1	Nktr
Rpn2	Nav3	Nnmt
C1qtnf5	LOC102552626	Nos3
Rnpc3	Psmd14	Nostrin
Zufsp	Zmiz1	Nploc4
Pfn1	Igbp1	Npm1
Rock2	Glo1	Nrxn3
Arhgap25	Pom121	Nudt2
Msi1	Rps3a	Nxpe1
Vash2	Caskin2	Oaz1
Carf	Hivep3	Ogt
Cnn3	Atp6v1e1	Optn
Bend6	Psmb1	P2rx7
L3mbtl1	Csmd3	Pabpn1
Tmem185b	Yae1d1	Paip2b
Cat	Gpr75	Pan3
Ano3	Arap3	Pcdh10
Cpt1a	Eif3e	Pcdhga10
LOC108348192	Pik3c2b	Pcdhgb7
Atox1	Tnks	Pclo
Ltbr	Ndufb6	Pcmt1
Atp1b2	Slc38a10	Pde2a
Nectin2	Rprd2	Pet100
LOC681177	RGD1310951	Pex14
Slc7a8	Pdcl	Phb
Slc27a1	Psmb4	Phip
Asrgl1	Zfp362	Pink1
2008-09-01	Shank1	Pir
Zfp192	Dicer1	Pithd1
Cpsf6	Med12	Pitpnm3
Gpr37l1	Snhg4	Pkd1
Agpat5	Drp2	Pknox2
Atp11b	Epc1	Plekhb2
Egfl7	Svep1	Plxna1
Ssfa2	Dido1	Plxnb1
Gng10	Asxl3	Polr2e
RGD1306148	Atp8a1	Polr2g
LOC102554677	Sco1	Pon2
Abat	Tmem70	Pou2f1
Sf3b1	Mycbp2_1	Prdm10
Ndufb10	Map3k2	Prdm11
Npepo	Tm9sf4	Prdx1
Szrd1	Dscaml1	Prdx2
Mt3	Fgd5	Prex1
Zfp451	Idh1	Prkg2
Prelid3a	Pitpnm3	Prom1
Degs1	Gdpd2	Psma3
Zc3h12b	Plxnb1	Psmc1
Card11	Trnm	Psmd12
Slc9a7	Lmf2	Psmd6
Dock1	Pop4	Ptchd4
Chdh	Cfap36	Ptp4a2
LOC102554754	Msrb1	Ptprg
Mpst	Nedd8	Ptpro
Kdm7a	Szt2	Ptprs
Prdx1	Gltscr1	RGD1307100
Tmem9b	Angptl4	RGD1308428
Invs	mt-Rnr1	RGD1310081
Col16a1	Ncoa6	RGD1310081_1
Cdkl5	Usp24	RGD1560289
Plpp3	Celf2	RGD1562987
Epha8	Atp5g3	RGD1565616
Dopey1	Cic	Rab37
Abhd3	Nos3	Rala
Camkk1	Ndufs4	Rbm11
Lasp1	Zfp236	Rc3h1
Rnf207	Rpl21	Reln
Cdk2ap1	Htt	Rev3l
Bcat2	Bptf	Rgs12
Abhd1	Kcnip3	Rnf144b
Hadh	Mast3	Rpl3
Pggt1b	Rpl9	Rpl31
Epg5	Ep400	Rpl37a
Mid1ip1	Brwd1	Rps16
Etv1	Paip2b	Rps24
Gucy1a2	E2f2	Rsf1
Spns2	Slc25a48	Ryr2
Btbd17	Atp5b	Ryr3
Pigt	Celsr3	Scap
Ryr2	Atp1b3	Scarb2
Snx5	Nxpe1	Sdf2
Pnrc2	Rpl7	Sdhc
Ninj2	Emc4	Sdhd
Hsd17b10	RGD1562987	Sdk1
Slitrk4	Atp5o	Sec16a
Dgkq	Cript	Sec62
Cpeb1	Psmc2	Sel1l3
LOC102547415	Fh	Selk
Rassf3	Ndufa5	Serinc5
Zzef1	Trim54	Sh3pxd2b
Srek1	RGD1310081	Ski
Baalc	Srgn	Slc17a7
Alpl	Dctn3	Slc19a3
Zfp512b	Rev3l	Slc20a2
Ppib	Abcc9	Slc25a48
LOC690131	Eif2s2	Slc2a1
Ctsz	Cspg4	Slc39a10
Laptm4a	Ubr2	Slc4a8
Mfn1	Polr2g	Slc6a6
Fam76b	Slc25a5	Slc7a1
Prdm11	Atf7ip	Slf2
Cmtm7	Zfhx3	Smg1
Rap1gap2	Pir	Smpd3
Adcy9	Oprm1	Snhg4
Prkab2	Col4a2	Snrnp48
Plcd4	Grin2b	Sobp
Lime1	Ncam1	Sorcs1
Rsrp1	Celsr2	Sorl1
Fnbp4	Mpp2	Srebf2
Me1	Gcn1l1	Srrm2
Adam11	Bzw1	St3gal5
Espn	Dcc	Sv2b
Tnrc6c	Capn15	Syne1
Mbnl1	Cttnbp2	Taf9
Cd9	Arhgef38	Tanc2
Nkain4	Ndufs3	Tbrg4
Chi3l1	Shisa6	Tenm1_1
Bcar3	Adamts20	Tet2
Fam135b	LOC102551693	Tet3
Atp6v0e1	Dhx34	Thumpd3
Atp1a1	LOC108351942	Timm8b
Cdk2ap2	Elmsan1	Tm9sf4
LOC102547703	Nnmt	Tma7
Zfp958	Cdk5rap2	Tmem59
Lgr5	Rpl18a	Tmem65
Bdnf	Ndufa6	Tmem9
Nnt	Fmo5	Tnfrsf19
Lix1	Afdn	Tnik
Sil1	Med13	Tnks
LOC102557338	Prdx5	Tnrc6a
Rab7b	Rpl36a	Tnrc6b
LOC689064	Gan	Tnrc6c
Selplg	Kank3	Tpcn1
LOC102546835	Pcdh10	Tpt1
Ogt	Ets1	Tra2a
Gas5	Rps3	Trim54
Padi2	LOC100359816	Trmt6
RGD1305110	Bcap31	Trnd
Bsn	Rpl37a	Trnk
Mmd2	Eif4a2	Trnl1
Rdh11	Ublcp1	Trnm
Nop56	Atp5h	Trnr
LOC501033	Lgals1	Tspoap1
Mall	Eif1a	Ttc1
Slc9a3r1	Nckap5l	Txn2
Serf2	Cd59	Ubald2
Pter	Tnfrsf25	Ublcp1
Gpr17	Cdk9	Ubn2
Ptgr1	Prdm11	Ubr5
Rbm33	Bnip3	Uchl5
Tspan33	Sdhd	Ufd1l
Tbc1d4	Otos	Unc13a
RGD1309821	LOC691387	Unc79
Rtbdn	RGD1308428	Unc80
Trdmt1	Nup214_1	Upf1
Leng8	Hars	Uqcr10
Zfp185	Kif17	Uqcr11
Kank4	Atp5g1	Usp24
Tgfb3	Wdhd1	Usp34
Mrps23	Cmpk1	Vps13c
Sf3b2	Pitpnm2	Vps13d
Acsm5	Ndufa7	Vps50
Skil	Gse1	Whsc1l1
Pdia6	Creb3	Wnt9b
Cpeb3	Rps18	Ylpm1
Hopx	Mrpl17	Zbed6
Ctnnb1	Rps7	Zbtb16
Plekha5	Sv2b	Zbtb40
Smpd1	Ncor1	Zbtb44
Slf2	Psmc6	Zc3h12c
2002-09-01	Baz2b	Zfp280c
Tmco1	Rpl23	Zfp335
Lhfpl2	Gstp1	Zfp952
Gfpt1	Strap	Zhx3
Cbx7	NEWGENE_1305560	Zic4
Kmt2a	Mrps18c	Zmym3
Usp29	Lyst	Znf740
Trnm	Eif5a	Zzef1
Mtss1l	Rpl24	mt-Rnr1
Zdhhc21	Cacna1d	mt-Rnr2
Mycbp2_1	Zmat2
Glmp	Cdc42bpb
Coro2b	Dclk2
Emc10	Phb
Arglu1	Srrm2
Paxbp1	LOC102546572
Vegfb	Rps14
Itsn2	Cept1
Khsrp	Uqcrfs1
Il17ra	Emc2
Ctsl	Tmem9
Slc7a6	Vps41
RGD1560289	Wnt9b
Oprl1	Lrrc8c
Tcn2	Gimap8
Pclo	Hspe1
Tspoap1	Zfp319
Phf14	Crtc1
LOC103692550	Cct2
Mdm4	Tmem265
Gsk3b	Emc7
Mmachc	Speg
RGD1559896	Ndufb8
Noc2l	Clta
Gdf10	Mrpl12
Rbsn	Gpr63
Dhx34	Hdac4
Map3k12	Arpc5l
LOC102556078	Rpl31
Mef2a	Pon2
Rev3l	Egfr
Cep95	Hook3
Crbn	Atp6v1h
Fam161b	Pdhb
Uvssa	Gapdh
Mgst1	Cops6
Cela3b	Nifk
Ttbk2	Vps13d
Erich3	Scfd1
Slc8a3	Rplp1
Pea15	Ptprz1
Adgrg1	Adgrl1
Tecta	mt-Rnr2
Cacnb2	LOC102554501
Grk4	Asxl2
Itm2c	Fis1
Cmbl	Smg1
Mturn	Adpgk
Herc1	Pou2f1
Mgea5	Psmb7
Ddhd2	Arfgef3
Wdfy4	Rpp14
Ctnna1	Napg
Ager	Tnik
Slc27a2	Nit1
Smg1	RGD1309108
Rps6kb2	Mkks
Donson	Tmem131
Pigk	Rnf115
Ccdc82	Sdc1
Mrps17	Slc25a11
Nfat5	Zfp462
Tnfrsf19	Ptpro
Akt2	Gbe1
Lgi4	Cfl2
Ganab	Got2
Chtf8	Auh
Cd302	Dagla
Haus7	Ttc1
Capn6	Atp5j
Pdzd7	Pcdh1
Med12l	Ushbp1
Fbxo2	Arntl
Tmem145	Nf1
Tmod2	Cox6a1
Pcdh11x	Tnr
Pign	Ptpmt1
Bcl2a1	Spn
Sdhc	Ddx25
Adcy7	Tcta
Phip	Acacb
Elavl2	Eif2s1
RGD1308428	Cd34
Rps6kb1	Upf1
Snx32	Mrpl48
Arsb	Uqcrc1
Akap11	Numa1
Lmbrd2	Vapa
Mrps31	Cpne9
Nhsl1	Prex1
Steap3	Otof
NEWGENE_1565481	Phc1
Crh	Tet2
Serpine2	Chrnb4
Rab5c	LOC108351685
LOC681355	Apc
Man1c1	Uqcrc2
LOC100362814	Snx25
Ubn2	Map3k13
Ptpn11	Vps13b
RGD1565775	Uqcrb
Metrn	Alk
Adam8	Akr1a1
Cox8a	Hspa2
Axl	Aco1
Kdelr3	Kcnk9
Pask	Nectin1
Cpeb2	Actr10
Pigq	Cacna1b
NEWGENE_1305560	Scarb1
Cdc25b	Ints1
Scd2	N4bp1
Itgb5	Shb
Banf1	Cops4
Spdya	Psma6
LOC108350721	Ptprg
Rsph6a	Rpl11
Fcer1g	Unc13a
Igfbp5	Psmc3
Acox1	Cops2
Syt7	Gpr17
Arhgef19	Adtrp
Ergic3	Btf3
Chrd	Immt
Sumf2	Mrpl13
Aco1	Tmem2
Ifi30	Ppp1cc
Ryr3	Tax1bp1
LOC108351880	Vdac3
Pde6d	Nol4l
Pdlim4	Ptprt
Slc22a3	Calm2
Setd1b	Ncor2
Hadhb	Cnih1
Kcnh5	Ccnh
Dctd	Taf9
RGD1561413	RGD1305587
Parp4	Nfatc2
Macrod2	Zmynd8
Cdon	LOC102547266
Nme3	Rpl10a
Sh2d5	RGD1565616
Cc2d2a	Arhgap31
Gpatch8	Tbc1d16
Rbmx	Zfp318
Scpep1	Uba3
Tns3	Ngfr
Mrs2	Ccndbp1
Ankrd13d	Gls
Adam17	Mrpl20
LOC100910558	Whsc1l1
Xrn1	Esrra
Map3k9	Rbbp7
Map2k4	Psmd8
Acy1	Timm8b
Vps13d	Ndufa10l1
Plod3	Cdon
Atpaf1	Tsc2
Arfgef3	RGD1306739
LOC102548730	Atp6v0b
Pptc7	Slc4a8
LOC108349532	Adgre5
Tle4	Lrig2
Rnf10	Magi1
Seli	Atp6ap1
Camk4	Sar1b
Uba1	Cdh22
Uqcrq	Tnrc6b
Ndrg2	Prg2
Wnt5b	Vps25
LOC302022	Morf4l1
Pltp	Tanc2
Csf1r	Bicd2
Zmpste24	Pag1
Lrp10	Rabggtb
Edf1	Slc6a6
Carmil3	Ndufs2
Phf20l1	Chd7
Rassf2	Glt1d1
Zfand3	Serinc5
Smim20	RGD1560289
LOC100910827	Dennd5b
Msx2	Cacna1c
Zc3h6	Selk
Scg2	Spag5
LOC365085	Rps4x
Khdrbs3	Tmem201
Nfrkb	Cox4i1
Adgre1	Rpl10
Zfp207	Pcdhga10
Lnp	Scand1
Fyttd1	Acvr2b
Cpne9	Slc30a9
Scn8a	Ddx11
Paqr7	Tet1
Apbb3	Ndufa12
LOC100363361	Tmem44
Usp33	Mga
Ccdc8	Pfdn5
Gng5	Rpl36al
Glra4	Rps16
LOC102548359	Setd3
Amfr	Sdhb
Kcnq2	Pmpcb
Stat5a	Rpl15
Pdpn	Emp2
Tnrc6a	Xpo5
Arl4c	Akr1cl
Grm5	Ssu72
Dad1	Ptprf
Foxred1	Nop10
Cyb5a	LOC100910850
Gabbr1	Wdr61
Ttc3	Herc1
LOC691807	LOC100363502
Rbm25	Foxj2
Mgll	Ubr5
Dchs1	Trmt10c
Aldh4a1	Mterf4
Trnd	Faf1
Gsdmd	Ppp2r2d
Nnat	Rps24
Rims2	RGD1310081_1
Jmy	Aco2
LOC102547266	Atp6v1b2
Dcx	Idh3B
Htt	Pde2a
Sidt1	Ildr2
Dock8	Cops5
Fzd1	Arhgap39
Tmed10	Spp1
Tanc2	Ago2
Kdm4c	R3hcc1
Atl2	Setbp1
Prrt2	Nbeal1
Cd38	Pgk1
C1galt1c1	Prnp
Ltbp3	Sdhc
Clptm1	Sod2
Cyp2j4	Klf9
Camk2d	Mdm4
Bmpr2	Cramp1
Mxd4	Cops7a
Tufm	Ptprd
Arfip2	Slc25a4
Sox6	Bcl9
Ggta1	Cep85l
Zcchc2	Slc8a2
Calr	Psmc1
Psd3	Ago3
Cox20	Ankdd1a
RGD1304884	Plekhb1
Wif1	Sec24b
Gas2	Lipa
Esyt2	Ube2n
Aloxe3	Tnrc6c
Ndufa11	Crbn
Pusl1	Apc2
Coro6	Atp13a5
Mtr	Phf2
Hdac1	Hip1
Abcb1a	Gdf10
Rnaset2	Cbl
Dhx36	B3gat3
Cyp7b1	Ino80d
LOC103693584	Ugp2
Rnasel	C10H5orf58
LOC102547720	Glod4
Acsf3	Rab37
LOC108349040	Ube2v2
Grm1	Zfp608
Ubl5	Mrps15
Tmprss7	Ankhd1
Kdelr1	Txn1
Entpd4	Kmt5c
Sh3bgrl	Gdi2
Acvr1b	Cct5
Fam198b	Habp4
Timp4	Ccdc122
Gfod1	Grm5
Scn2a	RGD1562037
Fkbp4	Cox7a2l
Arl6ip4	Tnrc18
Med16	Cst3
Bcap31	Ice1
Adora1	LOC689081
Tp53inp2	Ankrd52
Mthfd1	LOC102554622
Ccdc62	LOC102553814
Nova1	Cct8
Slc7a5	St3gal5
Nxpe3	Ccm2l
Fat1	Cacna1h
Snhg11	Pink1
Twist1	Dock3
Eif2b1	Flvcr2
Golga1	Dennd4b
Tpt1	Zc3h12c
Wfs1	Psme4
Rab3gap2	Cd86
RGD1562114	Utp3
Pgbd1	Nudt2
Arhgap8	Cad
Nfxl1	Atp6v1g1
LOC103691005	Anxa4
Aldh2	Tjap1
LOC102556093	Arid2
Tomm6	Tusc2
Fam163a	Anxa6
Syde2	Ndufb4
Ndufs8	Uchl5
Optn	Psme3
Arhgef6	Ndfip1
Slc25a48	Srrm4
Emc3	Pdcd10
Scd	Gcsh
Serp1	Grsf1
Bet1	Cplx2
LOC102552369	Nup188
Mllt1	Kdm6b
Cops9	Nans
LOC100909824	Esd
Dbi	Ipo11
Por	Itpr3
Ost4	Mpzl1
Igsf1	Mas1l
Tbc1d15	Adh5
Calu	Zfp398
Ppp2r3a	Fam193a
Ankrd26	Apex1
Slc26a6	Plekhb2
Braf	Dip2b
Map4k2	Prdx1
Mbd3	Rnf7
Tomm7	Mlx
Trappc6a	Lamc1
Spg20	Dpy19l3
Hhatl	Trni
Chrm2	Clstn2
Dmpk	Afap1
Adam22	Rabl3
Hist1h2bh	Rala
Rell1	Fabp5
Cyp4x1	Ppif
Caln1	Slc52a3
Zmat1	Ndst1
Colgalt1	Ikbke
Echdc1	Plekhm1
Fam13c	Unc80
Limd2	Ngf
Lancl3	Tmem183a
Ctsh	P2rx7
Pcgf6	Adam19
Rbm11	Txn2
Elavl4	Rsf1
Ccnt2	Zfp618
Ctif	Igsf10
Cep350	Pabpn1
Gigyf1	LOC690035
Snx4	Tra2a
Rnf5	Tma7
Slc25a20	LOC100363368
Pragmin	Ptpn23
Dusp3	Mxra7
Pdia3	Zbtb37
Timm13	Gtf2f1
Zfp61	Mrps36
Iffo1	Idh3g
Pja2	Trnr
Jam2	Cacybp
Eci2	Slf2
Tro	Ncl
Glud1	RGD1565641
LOC103693391	Fam160b1
Mrpl34	LOC103690947
Ubash3b	LOC689268
Abcc9	Ccnc
Asns	Pcdh17
Tmem196	Zfp592
Ccser2	Ndufa8
Vstm4	P2rx3
Creb3l1	Slbp
Slc7a1	Kidins220
Tbc1d10a	Slc38a5
Irf5	Zbtb44
Lactb	Tmem5
Mbd5	LOC102547107
Pcdhgb7	Ccnjl
Ddx3	Tjp1
Atp6v1b2	LOC108352957
Slc35f6	Clk2
Dars	Cox7c
LOC102553495	Tsg101
Tef	Bin2
Rhoa	Prkg2
Bclaf1	LOC102551251
Oaf	LOC102550527
Hif3a	Pithd1
Tspan6	C2cd3
Gnl2	Pin1
Atp1a2	Acap3
Adgra3	Capza2
Myo5a	Slc17a7
Cdc25c	Setx
Fam20c	Kcnb2
Gpr165	Ndufs1
Polr3k	Bpifb4
Acot2	Lcor_1
Zgpat	Ankrd11
Rassf5	Plcb1
Pex13	Svop
Rplp0	Cetn2
LOC102555866	Rpl13a
Micu3	Tnfsf8
Ccdc124	RGD1559904
Sav1	Anks1a
Pno1	Mdh1
Mvp	Atpif1
Cabp7	Ptcd3
Klhl11	Psma5
Ulk1	Txndc9
Tmem176b	Tomm20
Hspe1	Adamts9
Pstk	Tmem184c
Usp13	LOC102553881
Ccnl1	Cntnap2
Zfc3h1	Ahdc1
Aif1	Srebf2
Pard3b	Sez6
Aak1	Zbed6
Rpn1	Adk
Mmgt2	Tpd52
Kcna2	Pknox2
Luc7l	Vbp1
Abcd1	Arl6ip4
Jmjd7	Ski
Slc25a27	RGD1560212
Dbn1	Trim47
Gdf11	Pnpla7
Dusp18	Fopnl
Adgrl2	Clec2d
Tiparp	Grin2d
Rpap3	Zcchc8
Fam227a	Aloxe3
Kif7	Zfp385c
Casr	Zc3h11a
Slc39a7	Zfp335
Dok6	Hivep2
Zfp597	LOC690155
Chkb	Cenpk
Arhgap18	Prdx2
Scn1a	Ly75
Rap1b	Spata2L
Ptgr2	Rgs12
Pttg1ip	Hsd17b10
Slco4a1	Ralgds
Ctsa	Phf21b
Prelid3b	Enc1
Atp5d	Urb2
Bambi	Calm1
Lmf2	Bckdha
Atxn7l3	RGD1560470
Abcc8	Dld
U2surp	Bahcc1
Rps29	Fryl
Sgip1	Mrpl16
Eny2	Purb
Rnf157	Dpm1
Serpina1	Tmem65
Stxbp5l	Snrpe
LOC108351553	Mlxip
Emp2	Sec62
Clvs2	Dnaja2
Gnai2	Chd6
Lman1	Als2cl
LOC108350352	Dis3l
Clk1	Psma1
Neo1	Sh3rf3
Epb41l2	Dvl3
Aprt	Maea
Plin4	Ablim3
Tia1	Degs2
Etfdh	LOC103692951
Rras2	LOC103692946
Baz2b	Cdan1
Jun	Sec16a
Mob1a	Piezo1
Brsk2	Rcor2
Mir186	Pde4dip
Vamp1	Nid1
Myo1f	Eng
Lrpprc	Frmd4a
Tpp1	Psma3
Ppp4r4	Stip1
Sash1	Rps6ka3
Pbld2	Sdcbp
Cry2	Cdk5
Cdk5	Psmd12
Vgf	Akap13
Egfem1	Mettl23
Trnr	Fanci
Krit1	Map1lc3a
Ubap1l	Usp34
Wt1	Abcf3
Anxa5	Rapgef2
Mmp16	Gyg1
Me2	Ddx17
Vcpip1	Kcnj6
Yap1	Cisd1
Inpp5d	Scrib
Pdlim5	Irf6
Pkig	LOC103690074
Sat1	Phf12
Tmem132b	Anp32a_1
Csf3r	Fchsd2
Camta1	Cox8a
Rb1cc1	Vps50
Slc30a3	Arhgap33
LOC108351061	Akr1b10
Zfp277	Fabp3
Gria1	Sdf2
Epha6	Stx12
Narf	Med20
Zfp141	Stx8
Lrp1b	Vps13a
Fam214a	Helz
Lamtor4	Mob2
Shroom3	Bloc1s2
Flrt1	Park7
Abhd14b	Kmt5b
Clybl	LOC361985
LOC102550291	Nhlrc2
Lrrc55	Lnx2
Adgrl4	Eif3g
Tor3a	Phospho2
Golm1	Lias
Dusp19	Znf740
Necap2	Ptchd4
Mtf2	Clns1a
Dennd1c	LOC680491
Epha10	Skp2
Synm	Dnaja4
Ubp1	Cdh4
Ada	Prdm10
Cnr1	Cntn4
Bcar1	Plscr2
Myl6	Macrod2
Acot1	Atp6v1c1
Pcdh12	Flrt1
Ric1	Gemin7
Ttc14	Zc3h4
Rbfox2	Nup160
Ighv	Cacna1e
LOC100911237	Zfp609
Tf	Rbm11
Pitpnm3	Cnbp
Jup	Mtch2
Asap2	RGD1359158
Tgfbi	Ntan1
RGD1561251	Ncoa2
Txn2	Ssr4
Eml2	Atxn2l
Shisa4	LOC108352908
Ndst1	Ptprs
Ift27	Dmd
Ldah	Ndufb7
Dhrs3	Iscu
Gemin8	Dock4
Bpgm	Rpl17
Gnb2	Mea1
Scyl3	Tifa
Whsc1	Ampd2
Oosp1	Ube2d3
LOC108352098	Hcfc1r1
Tlr2	Tex43
Slc7a14	Prdx3
Osbpl6	Sel1l3
Neb	Pcmt1
Cers2	Zhx3
Tubb4b	Rpl27a
Olig1	Trmt6
Ints4	Plvap
Luc7l2	Ndufa9
Fam131b	Cycs
Slc6a15	Slc20a2
Mydgf	Csde1
Lmtk2	Astn1
Mrpl54	Dock7
Prkacb	Nktr
Clk4	Spry3
Ppp3ca	Pfdn6
Sv2b	Zic4
Coa4	Upf3a
Sumf1	Focad
Mas1	Cdh2
Vwc2l	Epha8
Lap3	Acad9
Cystm1	Ivd
Zfp157	LOC108351758
Nrbp2	Rps23
Tom1l1	Oaz1
Utrn	Gps1
Pnn	Mrpl35
Ctnnbl1	Vdac2
Cyfip2	Dgkd
Cirbp	Tnfrsf19
LOC679894	Fbxl19
Dkk3	Tpt1
Vegfa	Trap1
Gtpbp1	Tecpr2
Flt3	Cox5b
Pla2g4b	Mpc2
LOC689574	Ndufab1
Srpk2	Safb
Tyw1	Arf1
Ebpl	LOC103694513
Gli1	Zfp280c
Wwp1	Pcna
Shisa5	Pcdh15
Scamp2	Irx2
LOC691170	Thnsl2
Las1l	Rassf4
Mesdc2	Copg2
LOC100360380	Cox14
Taf1d	Lcmt2
Mecp2	Hs3st2
Ttc39b	Cep250
LOC108351545	Ubxn1
LOC690414	Churc1
Cacnb4	LOC103692397
Mrpl27	Hcn1
Smim17	Erbb4
Copz2	Atp5d
Pbld1	Fstl4
Tmem63c	Snx6
Thsd7a	Smpd3
Rfx4	H2afz
Slc35d1	Cyp2j3
P2rx5	Ndufs5
Fmo2	Sik2
Zfp503	Jph4
Nrg1	Tstd3
Elof1	Ccnt2
Hm13	Oat
Swi5	Hrasls
Fam117a	Tpcn1
Kctd9	Chchd3
Aldh3b1	Thumpd3
LOC103690089	Cir1
Fgfr1	Chst3
Nkd1	Vimp
Ybx1	Ppp1r2
Boc	Zmym3
Wnt7a	Sbds
Cldn10	Rtcd1
Spag9	Edc4
Zhx2	Mmrn2
Gpatch4	Khk
Xylb	Cap1
LOC108353018	LOC103694121
Mxra8	Poldip2
Kmt2e	Erich3
Nptx1	Mycn
Hepacam	Ttc9c
Tubb2b	Zfp952
Prdm15	Itgb3bp
Nap1l2	Ndufb5
Lcat	Sugt1
Hectd2	Bcl2l15
Nde1	Pigy
Sh3kbp1	Abhd1
Thrsp	Lcor
Pnp	Eef1b2
Mtif2	Sdha
Ppp3r1	Tenm1_1
Brcc3	Scarb2
Npas3	Ifnar1
LOC108348833	Adamts15
Mtap	Plxna3
Dhcr7	LOC108349703
Eif4ebp2	Rcc2
Aldh1a2	Lgals9
Rps6ka5	Sobp
Odc1	Nploc4
Ptgs1	Sirt3
Nvl	Ifrd2
Hsdl2	Ncln
Srsf11	Ufd1l
Slc25a23	Gpr4
Slc25a39	Pex14
Spcs1	Prkdc
Reln	Ing4
Klhl25	Rpl32
Atp8a2	Atp5e
Prrx2	Scap
Ube2l6	Cyp2d3
LOC103694857	Pgam1
Atg13	Snrnp48
Rbm5	Ufm1
Lcor_1	Erc1
Ech1	Sorcs1
Dmxl2	Eif2s3
Rmnd1	Pknox1
Mapre1	Camk2a
Rilpl2	Prr14l
Ptpdc1	Lrrc8d
Arf6	Fkbp8
Trove2	Tbx4
Qprt	Naa25
Trmt13	Nol6
Hdac10	Rnf146
Cthrc1	Taf1c
Pros1	Pes1
Pet100	Plxna4
Rbbp6	Srgap3
Atp5g2	LOC108349107
Gm2a	Col7a1
Nit2	Mllt1
Tmem87b	Tmem186
Pgm2l1	Rexo1
Cacna1e	Efna5
LOC108351758	Dll4
LOC100912293	Med14
RGD1561277	Faap24
Irak3	Cacna2d2
Sec61a1	Kcns2
Zbtb25	Dlc1
Mctp1	Ptp4a2
Nt5dc3	Rnasek
Matk	LOC102549542
LOC102547897	Ogt
Akt3	Dnajc8
LOC100912167	Lmtk3
Plekhm3	Mtrf1
Arhgap44	Sox18
Amer1	Cyp2j4
Ilk	Gabarapl2
Serac1	RGD1564247
LOC102549402	Ipcef1
Hexa	Ksr2
Anapc13	Zbtb40
Myom3	Ccdc88a
Gstt1	Dpm3
Snx18	Ss18l2
mt-Rnr2	Lamb3
Smim5	Pex16
Lat2	Dusp8
Ndst4	Chd2
Opa1	Atp10a
RGD1310081	Rnf11l1
Stx1b	Phf8
Pak1	Mrfap1
Asgr1	Hnrnph3
Fbxo38	LOC102553088
Ftx	Son
Mir770	Psmb3
Pla2g4e	Dync2h1
Hsp90ab1	Eif2s3y
Tmem132a	Cops3
RGD1305350	B3glct
Dnajc5	Ndufaf7
Gas1	Nsfl1c
Abhd17c	Mcoln1
Lrrc7	Zfp169
Plcb3	L2hgdh
Zbtb40	Crh
Zfyve27	Shisa7
Sqrdl	Ppfia2
Tvp23a	Slc25a3
Rgs17	Tmem55b
Cacna1b	Ndufv1
Ganc	Zbtb16
Ercc6	Sppl3
Mppe1	Atxn1
Acadm	Sh3pxd2b
Uhrf1bp1l	Pet100
Timm9	Eif4a1
Cntn1	Iws1
Ggcx	Vps29
Rbm25l1	Rc3h1
Begain	Tbrg4
Hook1	Tomm22
Mthfs	Commd3
LOC103693092	Mrps33
Snrnp70	Shprh
Gls	Tspoap1
Tmem158	Atad1
LOC102553298	Gon4l
B3gnt8	Spint1
Mfsd12	Zbtb42
LOC684327	Ints6l
Rgs7bp	Cabp7
Camk2b	Bag1
LOC102548287	Plagl1
Mroh5	Wscd2
Plekha6	Klhl41
Gpr22	LOC100910788
Pafah1b1	Reln
Ier5	Polr2e
Lmln	Ylpm1
Eea1	Tyk2
S100a1	LOC103694424
Pde7a	Lyplal1
Agbl3	Trim62
Dock2	Znrf3
Paqr4	Tmem59
Cecr5	Dlgap3
Herc3	Grik5
Srrm1	Gramd4
Ptch1	Uqcr11
Ints6l	Ttc17
Ndufa10l1	Nrxn3
Psap	Pgap1
Mtus2	Med31
P4hb	Micu2
Pgls	Neurod6
Adamts2	Pogz
RGD1566401	Prelid1
Eif5a2	Pfas
Dstn	Amacr
Nktr	Guk1
Srebf2	Lama4
Rasgrf1	Dlgap2
Gadd45gip1	Lgr6
Cygb	Sos2
LOC361985
Tmem50a
Gfra4
RGD1564053
Chchd3
Srsf2
Nrip3
Mllt10
LOC108352166
Dock7
Scai
Cd82
Tspan11
Arhgef9
Agtpbp1
Sharpin
Sytl5
Ptchd4
Pla2g15
Yif1a
Rbm3
Smim15
Rnmt
Peli3
Flnc
Atp5i
Hdac9
Prdm10
Lrrc45
Lrrc8c
Tfrc
Ero1a
C3
Snapc4
Mgat5b
Hmbox1
Plpp4
Ptpro
Hspb6
Ptpn6
Mcee
Slc3a2
Hist1h1c
Cldn5
Samd5
LOC100910676
Cdk14
Tspan3
Slc46a1
Ak4
Grik2
LOC108348051
LOC100912823
Enpp3
Zmat3
Pcdhgb4
Pik3ap1
Fam13b
Ccdc88a
Tmed1
Zfp445
Itpripl2
Ogfod1
Eaf1
P2ry4
Snf8
Ptpra
Pofut2
Ak2
Emid1
Ccdc3
Pip5kl1
Tbrg4
Zfp710
Ifi47
Chd1l
Tspan31
Susd5
Rpe
Cyba
Heatr3
Cep295
Serinc2
Eml1
Dph3
Zbtb7c
LOC108349760
Scamp4
Osbpl8
Kcna1
Slc41a1
Caskin2
mt-Rnr1
Arfgap2
En2
Slc24a2
Stxbp1
Erc2
Aass
Cmc2
H2afv
Letm2
Nfam1
Map3k5
Dcaf17
Rbfox3
Dnmbp
Efnb1
Chrna4
Scn4b
Morc3
Puf60
L1cam
Clca1
Llgl1
Cap1
LOC102547903
Atxn7
Sv2c
Rapgef4
Fam184b
Nxn
Rbm41
Mir1249
Rbck1
Crebzf
Ppp1r9a
Ppargc1b
Upf1
Map3k15
Wdr54
Vcam1
Ybey
Uqcr10
LOC102547667
LOC108349039
Impact
Crat
Arid3a
Fam196b
Mon2
Gramd1a
Vps50
Nme2
Eps8
Skap2
LOC684327_1
Mapkapk3
Ctc1
Slc9a5
Clu
RGD1562310
Acer2
LOC108351541
Tsen15
Pcdhgb5
Nid1
Ago4
Gfap
Htra3
LOC108351885
Itm2b
Decr1
Cntfr
Rmi1
Dnajb12
Mpzl1
LOC100911177
Adcy1
Rc3h1
Cryl1
Sall2
Ccni
Zc3h12c
Rcan2
U2af2
LOC310926
Cisd2
Cyb5r2
Fyco1
Paqr9
Vamp3
Stat1
Mbd6
Fam193b
Fam210b
Plcxd2
Sppl2a
Adgrf5
Gnl3
Draxin
Hsph1
Penk
Rufy3
Wdpcp
Tcf7l1
Pgm3
Limk1
Brca2
Cyp51
Gpld1
Tmem245
Atl1
Cdc37l1
Slc37a2
LOC103693323
RGD1307752
Gabrb2
Mrpl38
Igfbp7
Phka1
Cntnap1
Ptms
Ywhae
Cetn2
Trpc5
Rac2
Mettl16
Hs3st5
Thbs4
Hsp90b1
Fbln1
Pou6f1
Epn2
Rhbdf1
Manbal
Akap8
Asxl1
Scp2
Plcd1
Tyrobp
Thbs2
Snrpn
Igsf10
RGD1565685
RGD1565002
Slc35f3
Atp6v1a
Col17a1
Uhmk1
Bcan
Vgll4
Sh3glb2
Srprb
Tmsb10
Kif3a
Slc19a3
Rnf123
Chst3
Sfmbt1
Tmem176a
Tmem147
LOC108348366
Ebf4
Mdfi
Entpd2
Uri1
Gal3st4
Pdpk1
Arfgef1
Mpzl2
Ttc7b
LOC108352127
Ap4e1
Dync1i2
LOC108348988
Kifc1
Cilp
Shd
Atp6v1e1
Map7d2
Ngb
Abcc2
Trim2
LOC108353136
Mcm2
Bri3bp
Apod
Tsc22d2
Tnfrsf1a
Cst3
Pepd
Hunk
Clec4a3
Nrxn3
Pxmp4
Hoxb4
Gckr
Kank1
Rexo2
LOC102546572
Zc3h7b
Klhdc2
Ptp4a3
Ddit4l
Zfand4
Rab37
Epha5
Cep70
Sod1
RGD735065
Gstk1
Trpv3
Smpdl3a
Kif26b
Ublcp1
Rai2
Parp8
Foxf1
Enpp5
Fdx1
Dock9
LOC108349710
Pcca
Fig4
Sh3pxd2b
Calb1
Rab11fip2
Irgm
Hibadh
Crip2
LOC100909405
LOC102548260
LOC102554909
Ago3
Plcxd3
Anxa3
Zfp280d
Cant1
Txlng
Ptprv
Klhl13
Xiap
Ncstn
Stk16
Laptm4b
Tmem208
Pan3
Ddost
Ints3
Ncoa3
Lyn
Pard3
Phb
LOC102552880
Fam189b
Myh7
Ylpm1
Mfsd11
Sgpl1
Angptl2
Pik3cg
Lhfpl5
Polr1e
Tex264
Fam171a1
Safb2
Slitrk5
Ppdpf
Atm
Atp6v1g2
B2m
Ankrd13b
Car8
Grsf1
Dnal4
Thbs1
Arhgdia
Cachd1
Slc16a1
Ikbkap
RGD1310769
Ptdss2
Plekhb2
Sulf1
RGD1559909
Naga
LOC102547219
Nadk
Cdc42ep4
Ric8b
Mei4
RGD1310352
Slc22a5
Zfp40
Eef1d
Ak1
Tarsl2
Ggps1
RGD1307235
Tbrg1
Heg1
Shisa3
Arhgef26
Ctsk
Zcchc16
Zim1
Mau2
RGD1307100
Rap1a
Isca1
Ppp1r9b
RGD1309779
Tubb6
Hoga1
Vwa7
P2ry6
Tmem263
Synpo
Gfpt2
Zfp612
Abcg2
Vcl
Slc2a10
Meltf
Aldh9a1
Orai2
Bbs2
Slc1a3
Ddb1
Reps1
Isg15
Coq9
Erh
Fcgrt
LOC108353239
Cdh12
Zfp280c
Med28
Mfsd1
Plin2
LOC102553657
Adipor1
Agt
Dap
Sctr
Hars
MGC108823
Rab28
Olfml2b
LOC102550474
Gstm1
Gyg1
Nat6
Abhd6
Hmgcs2
Rpl39
LOC108352302
Ss18
Csnk1g3
Fbxl7
Tomm40
Ddrgk1
Cacna1a
L3mbtl2
Chmp5
Cyfip1
Fcho1
Fbxo41
Atp2b1
Glg1
Col2a1
Tti1
Prkg2
Mapk11
Nfkb2
Ypel4
Pgm2
Hcrtr2
Fbxl20
Ccdc136
Slco3a1
Rasa1
Relt
LOC108349985
Tet2
Snrpg
Acss3
Dact1
Slamf8
Grk3
Rpl18
Rasgef1a
Elac1
Cbs
Kcnip3
Bptf
Trim65
Tspyl4
Zmym2
Gabrg2
Stx3
Pald1
Ptprg
Lrp5
Sox2
Eif4b
Lypla1
Cyb561d2
LOC102551251
Cdyl2
Pcf11
Il6r
Dhrs1
Tmem223
LOC103694111
Slc39a1
Cklf
RGD1305645
Tmem164
Cacng4
Atf6b
Ankrd10
Nqo1
Ssx2ip
Hmgcll1
Rtn4rl2
Slc25a15
Cacng2
Acss1
Senp7
LOC100910788
Cand2
LOC691113
Osbp2
Gper1
LOC108352957
Palm2
Slc17a5
Rassf10
Myh14
Pkib
Zdhhc20
Trmt6
Arrdc3
Mocs2
LOC501038
Kif21a
Fastkd1
Kif1b
Kcnab1
Arhgdib
Avl9
Dusp10
Mid2
LOC102552985
Itga6
Ghr
Krcc1
Hfm1
Cacna1h
Luzp2_1
Ppp3cb
Cabp1
Calm1
Unc5a
Sec24a
Exoc3l4
Nwd2
Cpq
Ecsit
Whsc1l1
Camk1d
Slc19a2
LOC108351556
Chic1
Ndrg4
Vsnl1
Rasgrf2
Slc6a5
Rsf1
Pdia4
Elk1
Kdelc1
Ssr2
Rab31
Gtse1
Flt4
Psme1
Lrrk1
Ide
LOC108352894
Ppm1l
Hecw2
Kifap3
Acot3
Zfp703
Wfdc2
LOC685680
Cnpy1
Mxra7
Tapbp
Atrn
Snapc2
Evc2
Phf24
Cntnap5c
Sardh
Chpf
Gldn
Rab27b
Ino80
Ankrd35
Pdzrn3
Zfp26
Zbtb20
LOC108351917
Btrc
Cd274
RGD1309534
Il13ra1
Peg3
Sptssa
Lzts3
Zfp605
Nceh1
Cxxc5
Lpcat3
Fam83d
NEWGENE_1565505
Scarb2
Nutf2
Ipo11
Mbtd1
Mmp19
Adamts13
Zfp182
Zkscan2
Ngef
Fuca1
Tab3
Gas7
Sf3b5
Acadl
Ltk
Fgfr3
Maf
Kazald1
RGD1563941
LOC102549342
Gpc6
Cspp1
LOC100912002
Tnfrsf11a
Nckap1l
Dpp10
LOC689065
Edc4
Tmem238
Cyp2t1
Svbp
Dhx57
Rps24
Hexim1
Ctdnep1
Atf2
Emilin1
LOC100911266
Hyal1
Nfatc2
Fgd4
Pgm1
Kcnj8
Add2
Vps13c
S100a13
Cracr2a
Mib1
Gpr84
Mgst2
Pappa
Xdh
Mospd3
Parp12
Lgr6
Eva1b
Accs
Rsu1
Iqcb1
Dhrs4
Sox4
Zfp654
LOC688869
Hoxb2
Lxn
Pabpn1
Txndc15
Uchl5
Serpinh1
Arfip1
Pnlip
Wdr37
Hecw1
Sh3bp4
Arhgef11
Cd68
Synj1
Kcnh7
S1pr1
Mrgprx3
Ctnnd2
RGD1560065
Id3
Map2k6
Ppp1r12c
Rsbn1
Disp2
Arrb1
Sec61g
Gamt
Stau2
Prrt1
Mapk12
Igf1
Slc38a2
Cib1
Mta3
Ikzf2
Atp6v1h
Slc29a1
Ccdc90b
Cbx1
Kcng4
Etnppl
Pgpep1
Acr
Jade2
LOC103693255
Slitrk2
Atr
Myef2
Copz1
Usp28
Afap1l2
Glb1
Esrrg
Stradb
Nckap5
Ip6k1
Usp9x
Fndc3b
Tmcc1
Cxcl12
Pogk
Pc
Cit
Nin
Cpne5
Etfa
Tlx3
Cidea
RGD621098
Gnptab
[truncated: 2,412 more rows]
