# Supplementary material
Source: Research Square preprint supplement (doi:10.21203/rs.3.rs-9685636/v1)
Supplement: Supplementary file 7 [file ec0296c5caaa4da699486637.xlsx]

## Sheet: all genes
GeneID	logFC	AveExpr	t	P.Value	adj.P.Val	B
Flt1	-1.23688	5.77117	-12.0626	9.17552e-09	0.00014968	10.3483
Ptprb	-1.07168	5.30226	-11.2586	1.83532e-08	0.000149698	9.66716
Prom1	-0.909282	4.44729	-10.1449	6.74656e-08	0.000276788	8.31902
Fat1	-0.552901	7.36736	-10.1401	6.78693e-08	0.000276788	8.57309
Clic5	-0.871791	3.73839	-9.92356	8.90242e-08	0.00029045	7.80828
Cep131	-0.671179	6.05243	-9.72805	1.14188e-07	0.000296851	8.0642
Fat3	-0.651132	5.67022	-9.60475	1.3386e-07	0.000296851	7.89724
Arl16	0.657295	4.83345	9.54012	1.45578e-07	0.000296851	7.73335
Adgrf5	-1.01099	5.25441	-9.37614	2.10856e-07	0.000382189	7.44088
LOC310926	1.12552	0.584448	8.63745	4.92286e-07	0.000751082	4.98926
Myo10	-0.445177	6.35469	-8.60654	5.14071e-07	0.000751082	6.6315
Itm2a	-0.725684	5.59786	-8.55525	5.52503e-07	0.000751082	6.55037
Abcb1a	-0.9195	4.82377	-8.15736	1.05246e-06	0.00132068	5.90223
Cldn5	-0.705115	5.05221	-8.01384	1.20508e-06	0.00133879	5.78765
Cxcl12	-0.820554	5.37821	-8.00686	1.3102e-06	0.00133879	5.72374
Birc6	-0.390866	7.48214	-7.91514	1.39445e-06	0.00133879	5.66147
Esam	-0.724783	3.14775	-7.87915	1.47112e-06	0.00133879	5.24684
Thsd1	-0.946869	2.45373	-7.87636	1.47724e-06	0.00133879	4.98213
Soga1	-0.473277	5.24774	-7.83945	1.56086e-06	0.00134013	5.54881
Nav1	-0.419703	7.25947	-7.8029	1.64861e-06	0.00134469	5.49745
Nbeal2	-0.556621	4.7129	-7.68364	1.97301e-06	0.00143372	5.30419
Dync1h1	-0.478695	9.73278	-7.67593	1.9962e-06	0.00143372	5.31533
Ubr4	-0.395794	8.53503	-7.66764	2.02142e-06	0.00143372	5.30071
Podxl	-0.649351	4.8597	-7.54606	2.43275e-06	0.00159787	5.11303
Mgat5b	-0.52284	5.8834	-7.54177	2.44877e-06	0.00159787	5.11571
Rps20	0.310265	6.48514	7.42976	2.90942e-06	0.00172349	4.94176
LOC102555453	0.88025	3.57867	7.42643	2.92444e-06	0.00172349	4.77904
Rasip1	-0.510241	3.44725	-7.41806	2.96254e-06	0.00172349	4.74187
LOC100911068	-0.834189	0.838717	-7.39072	3.09075e-06	0.00172349	3.8721
Slc2a1	-0.348832	6.81686	-7.3745	3.16954e-06	0.00172349	4.85606
Csmd2	-0.569714	5.59539	-7.30294	3.54331e-06	0.00174473	4.75844
Csmd1	-0.570143	4.55809	-7.2904	3.61344e-06	0.00174473	4.72481
Dnmt3a	-0.29898	6.30756	-7.28955	3.61825e-06	0.00174473	4.72917
Chd1l	0.881295	3.20105	7.28635	3.63642e-06	0.00174473	4.49481
Ralgps1	-0.413388	5.50425	-7.23728	3.92725e-06	0.00183043	4.65909
Zfp366	-1.05398	1.57617	-7.1869	4.25141e-06	0.00190672	3.87046
Slco1a2	-0.756158	5.58382	-7.25659	4.32469e-06	0.00190672	4.57816
Erg	-0.85269	2.76146	-7.0637	5.16874e-06	0.0021629	4.07266
Cyyr1	-0.856746	3.97777	-7.05493	5.24155e-06	0.0021629	4.32386
Med13l	-0.335309	5.92085	-7.04756	5.3035e-06	0.0021629	4.35919
Cbfa2t3	-0.529458	3.86465	-6.9939	5.77889e-06	0.00229352	4.22453
Pecam1	-0.927303	3.23486	-6.96139	6.08855e-06	0.00229352	4.05613
Plxna1	-0.399863	6.31441	-6.95875	6.11441e-06	0.00229352	4.21311
Adgrl4	-0.961431	3.27384	-6.93111	6.39269e-06	0.00229352	4.02175
Zfp142	-0.363317	5.71056	-6.92983	6.4059e-06	0.00229352	4.17819
Cryz	0.540376	4.02832	6.9239	6.46735e-06	0.00229352	4.14086
Egflam	-1.02116	2.92141	-6.86981	7.05823e-06	0.00240513	3.85191
Atp6v1d	0.288836	7.60704	6.85683	7.20835e-06	0.00240513	4.04666
Spen	-0.448028	6.27206	-6.85546	7.22437e-06	0.00240513	4.04942
Mical3	-0.328654	6.09989	-6.82836	7.54936e-06	0.00246305	4.00876
Wdfy3	-0.373078	8.25988	-6.77538	8.22988e-06	0.00261064	3.91998
Syne1_1	-0.626786	6.20511	-6.80153	8.32178e-06	0.00261064	3.91858
Glrx5	0.360877	5.66829	6.72842	8.88705e-06	0.00268572	3.85822
Rps15a	0.278455	6.67419	6.72819	8.8904e-06	0.00268572	3.83913
Shank3	-0.367582	6.03911	-6.68792	9.49804e-06	0.00277395	3.7839
Ash1l	-0.283751	7.51177	-6.68431	9.55463e-06	0.00277395	3.7676
Macf1	-0.431584	9.60017	-6.67119	9.76316e-06	0.00277395	3.76504
Glrx3	0.343329	6.87642	6.65033	1.01046e-05	0.00277395	3.71135
Lef1	-0.728233	2.40007	-6.64559	1.01841e-05	0.00277395	3.41402
Ndufb9	0.338262	7.1516	6.64448	1.02027e-05	0.00277395	3.70147
Lrp1	-0.399442	9.97947	-6.61559	1.07016e-05	0.00286081	3.67904
Hectd4	-0.391395	8.17022	-6.60599	1.08729e-05	0.00286081	3.64412
Notch1	-0.385216	6.0719	-6.59054	1.11549e-05	0.0028884	3.62464
Zcchc14	-0.374657	4.97487	-6.57944	1.13623e-05	0.00289614	3.63595
Kmt2a	-0.552769	7.29938	-6.52437	1.26836e-05	0.00314863	3.48906
Trrap	-0.419809	7.44925	-6.51071	1.27389e-05	0.00314863	3.48257
LOC100362819	-0.453062	5.2616	-6.48075	1.33928e-05	0.00326085	3.46904
Zfhx2	-0.489857	4.89927	-6.43423	1.44791e-05	0.00347349	3.40319
Cldn4	1.2747	0.435735	6.40112	1.53079e-05	0.00361909	2.61144
Plec	-0.392451	8.10577	-6.39062	1.55813e-05	0.0036311	3.28753
Agrn	-0.441099	7.09813	-6.36743	1.62027e-05	0.00363761	3.24321
Lrp1b	-0.549068	5.42124	-6.3604	1.63963e-05	0.00363761	3.26627
Tek	-0.728275	4.20102	-6.3434	1.68744e-05	0.00363761	3.25581
Ep300	-0.326674	6.41688	-6.34089	1.69462e-05	0.00363761	3.20385
Glrx	0.345327	5.55555	6.33676	1.7065e-05	0.00363761	3.2212
Nostrin	-0.60367	1.79859	-6.33546	1.71027e-05	0.00363761	2.85025
Slc7a1	-0.488737	5.75927	-6.32714	1.73452e-05	0.00363761	3.19874
Cnksr2	-0.90629	4.02569	-6.38662	1.73931e-05	0.00363761	3.22731
Ndufa4	0.284449	7.70824	6.31506	1.77041e-05	0.00365578	3.15765
Srcap	-0.302134	6.94717	-6.27389	1.89864e-05	0.00386799	3.0858
Dchs1	-0.397924	5.93365	-6.26219	1.93683e-05	0.00386799	3.08377
Rps25	0.345541	6.79558	6.25993	1.94431e-05	0.00386799	3.0629
Kdm5b	-0.234908	5.97632	-6.24972	1.97844e-05	0.00388848	3.0609
Vps13c	-0.407422	7.09627	-6.23764	2.01963e-05	0.00392217	3.02447
Sucla2	0.292443	7.85804	6.21529	2.09821e-05	0.00402684	2.99027
Gjc1	-0.564261	1.75881	-6.19594	2.16883e-05	0.00411397	2.65178
Trnk	1.10356	4.91862	6.46253	2.23834e-05	0.00419507	3.04037
Trng	0.84553	3.98272	6.20277	2.26302e-05	0.00419507	2.97649
Hspa12b	-0.805735	2.47272	-6.15172	2.33974e-05	0.00426836	2.73641
Utp20	-0.341724	4.90689	-6.13697	2.39984e-05	0.00426836	2.91293
Arid1a	-0.301434	7.2968	-6.12545	2.44792e-05	0.00426836	2.83371
Sox17	-0.835053	2.27476	-6.12353	2.456e-05	0.00426836	2.6579
Myom3	0.989433	3.04124	6.13047	2.46735e-05	0.00426836	2.7942
RGD1306271	-0.38421	4.83364	-6.11307	2.50068e-05	0.00426836	2.87572
Pcdh19	-0.390098	5.47225	-6.11242	2.50346e-05	0.00426836	2.84826
Rpl5	0.266327	7.8103	6.10608	2.53102e-05	0.00426836	2.80375
Tet3	-0.380916	5.14962	-6.10447	2.53804e-05	0.00426836	2.84879
Dot1l	-0.460932	5.79115	-6.0873	2.61437e-05	0.00431164	2.79282
Fat4	-0.692465	3.96934	-6.07727	2.66009e-05	0.00431164	2.82043
Dst	-0.33876	10.1306	-6.07602	2.66582e-05	0.00431164	2.78474
Brd4	-0.257777	6.96932	-6.07523	2.6695e-05	0.00431164	2.7472
Lactb2	0.310917	4.86035	6.06853	2.70058e-05	0.00431908	2.79984
RGD1561113	0.369298	5.38537	6.03491	2.86255e-05	0.0045164	2.72013
Syne1	-0.377156	8.08943	-6.02747	2.89973e-05	0.0045164	2.6715
Neo1	-0.302831	7.40158	-6.02602	2.90702e-05	0.0045164	2.6634
LOC108349760	-1.37239	0.950305	-6.02926	2.93757e-05	0.00452082	2.24121
Psmb6	0.256721	6.50342	6.00565	3.01175e-05	0.00459165	2.63155
Ostc	0.28987	5.45107	5.99761	3.05414e-05	0.00461317	2.65315
Prrc2c	-0.36863	7.03969	-5.97274	3.18931e-05	0.00472905	2.57046
Phip	-0.375506	5.87138	-5.96844	3.2133e-05	0.00472905	2.58551
Prp2l1	-0.468811	5.30935	-5.96307	3.24355e-05	0.00472905	2.60174
Kmt2d	-0.521394	7.46296	-5.97104	3.27105e-05	0.00472905	2.55025
Mdn1	-0.480125	6.4384	-5.94398	3.35347e-05	0.00472905	2.52699
Col4a1	-0.824359	5.32222	-6.10055	3.38547e-05	0.00472905	2.6014
Prr12	-0.33372	6.15567	-5.93852	3.38561e-05	0.00472905	2.52388
Itga6	-0.326326	6.46467	-5.93807	3.38831e-05	0.00472905	2.51557
Fkbp3	0.316802	7.31577	5.93536	3.40438e-05	0.00472905	2.50595
Rps27a	0.252048	7.63636	5.92834	3.44644e-05	0.00472905	2.49571
Chd9	-0.34771	6.53009	-5.92474	3.46823e-05	0.00472905	2.49132
Tie1	-0.601737	4.35962	-5.92301	3.47873e-05	0.00472905	2.57096
Herc2	-0.320116	8.47119	-5.89624	3.64574e-05	0.00491511	2.44906
Sorl1	-0.315642	8.00376	-5.88641	3.70917e-05	0.00493103	2.42607
Dlg5	-0.275089	5.94823	-5.88048	3.74797e-05	0.00493103	2.42989
Srp14	0.261794	6.3873	5.88044	3.74822e-05	0.00493103	2.41656
Kcnn3	-0.366643	4.6402	-5.8672	3.83646e-05	0.00497607	2.46868
Phc3	-0.269654	6.93498	-5.86616	3.84347e-05	0.00497607	2.38496
Gpx4	0.338771	8.20023	5.8503	3.95223e-05	0.00507659	2.36528
Myh8	1.30305	0.85557	5.84383	4.05877e-05	0.00514989	1.97449
Psma2	0.238554	6.4549	5.82383	4.1409e-05	0.00514989	2.31609
Ano5	-0.568367	1.4679	-5.82196	4.15456e-05	0.00514989	2.07544
Kmt2c_1	-0.38702	6.77162	-5.82091	4.1623e-05	0.00514989	2.30701
Cox6c	0.294745	7.34116	5.82025	4.16714e-05	0.00514989	2.305
Sema3g	-0.687008	3.26862	-5.81433	4.21086e-05	0.00516479	2.34823
Chd8	-0.243802	6.89135	-5.80429	4.28624e-05	0.00521802	2.27661
Nsd1	-0.276224	7.49394	-5.79329	4.37038e-05	0.00525927	2.25857
Raph1	-0.411142	5.24663	-5.79145	4.3846e-05	0.00525927	2.30892
RGD1307100	-0.345927	8.13714	-5.78729	4.41695e-05	0.00525939	2.25413
Zfp532	-0.275661	5.86684	-5.75412	4.68425e-05	0.00544562	2.21229
Trio	-0.290221	7.01059	-5.75315	4.69228e-05	0.00544562	2.18627
Efhd2	0.623972	7.20793	5.84289	4.71691e-05	0.00544562	2.20877
Ryr2	-0.454857	7.32783	-5.75008	4.71785e-05	0.00544562	2.18174
Gltscr2	0.299442	6.08178	5.74741	4.74026e-05	0.00544562	2.19221
Ryr3	-0.510856	5.3254	-5.73872	4.81394e-05	0.00545743	2.21348
Pcp4	0.333689	7.33418	5.73831	4.81745e-05	0.00545743	2.16074
Rnf144b	-0.482378	4.06368	-5.72672	4.91766e-05	0.00551058	2.24431
Rgs5	-0.843582	4.74045	-5.85152	4.93192e-05	0.00551058	2.25456
2015-09-01	0.267469	7.70819	5.70279	5.13152e-05	0.00568585	2.10052
LOC100912002	0.559995	3.34415	5.69985	5.1585e-05	0.00568585	2.17201
Fundc1	0.252513	5.75503	5.67374	5.40418e-05	0.00589606	2.07555
Epg5	-0.243724	6.16642	-5.67195	5.4215e-05	0.00589606	2.05606
Bcorl1	-0.302548	4.7042	-5.64064	5.73349e-05	0.00619407	2.0766
Slc39a10	-0.32552	6.84457	-5.60107	6.15462e-05	0.00658448	1.91709
Npm1	0.214822	7.33308	5.59918	6.1756e-05	0.00658448	1.91346
Ubn2	-0.335668	5.99788	-5.5796	6.39659e-05	0.00673703	1.89847
Kmt2e	-0.243054	7.00033	-5.57919	6.40127e-05	0.00673703	1.87707
Epas1	-0.320104	7.67797	-5.57108	6.49538e-05	0.00676386	1.86585
Pclo	-0.45979	7.05098	-5.57266	6.5097e-05	0.00676386	1.86174
F8	-0.445107	4.22538	-5.56178	6.60487e-05	0.00681932	1.96132
Usmg5	0.298177	6.5226	5.55458	6.69108e-05	0.00685351	1.83783
Zfp704	-0.352007	5.1219	-5.54993	6.7473e-05	0.00685351	1.89316
Rai1	-0.292454	6.2725	-5.54856	6.76402e-05	0.00685351	1.83326
Fam103a1	0.290311	4.75314	5.54167	6.84855e-05	0.00686117	1.90103
Hmcn1	-0.763458	2.65317	-5.54109	6.85571e-05	0.00686117	1.84156
LOC108349532	0.803971	2.20872	5.53235	6.96458e-05	0.00688876	1.76829
Cyc1	0.227941	7.52044	5.5321	6.96773e-05	0.00688876	1.79461
Ak1	-0.332822	5.7869	-5.52402	7.0701e-05	0.00691058	1.80862
Thoc7	0.241851	5.70808	5.52367	7.07453e-05	0.00691058	1.81142
Zfp827	-0.245283	5.7248	-5.5172	7.15757e-05	0.00694649	1.79917
Car4	-0.76471	2.69527	-5.5142	7.19645e-05	0.00694649	1.80451
Trnd	0.946772	3.65464	5.56351	7.53013e-05	0.00718426	1.8535
RGD1559731	-0.718716	1.48588	-5.48799	7.54568e-05	0.00718426	1.59478
Tenm2	-0.527933	5.97002	-5.51299	7.57489e-05	0.00718426	1.74162
Kmt2b	-0.296752	5.80907	-5.47638	7.70598e-05	0.0072084	1.72211
Lrch3	-0.26619	6.02384	-5.47578	7.71437e-05	0.0072084	1.71128
Pcdhgb7	-0.529813	3.32628	-5.47446	7.73291e-05	0.0072084	1.80143
Rnf44	-0.212468	6.73724	-5.46659	7.844e-05	0.0072704	1.67629
Pkd1	-0.309901	7.39088	-5.45996	7.93878e-05	0.00731267	1.66393
Rpl19	0.224019	7.93454	5.45586	7.99801e-05	0.00731267	1.66132
Unc79	-0.374783	5.75587	-5.45407	8.02408e-05	0.00731267	1.68516
Atp5j2	0.265938	7.05382	5.44379	8.17514e-05	0.00740895	1.63346
Atp5l	0.26501	7.32927	5.43233	8.34713e-05	0.00750782	1.61353
Uqcr10	0.308019	6.35179	5.43041	8.37628e-05	0.00750782	1.61841
Fry	-0.31472	7.57476	-5.424	8.47443e-05	0.00754379	1.60028
Cox7b	0.32322	7.20261	5.42177	8.5089e-05	0.00754379	1.59393
Optn	0.229488	7.09219	5.41465	8.61984e-05	0.00760084	1.58066
Ubald2	0.337462	5.15352	5.40806	8.72391e-05	0.00763327	1.63873
Isca1	0.28193	7.43037	5.4064	8.75021e-05	0.00763327	1.56723
Gsto1	0.330138	6.15069	5.39059	9.00598e-05	0.00780187	1.55275
Ndufa2	0.277469	5.72284	5.38857	9.03913e-05	0.00780187	1.56825
Cacna1a	-0.371355	7.00073	-5.37247	9.30855e-05	0.00799213	1.50462
Rpl26	0.240633	7.4782	5.36498	9.43671e-05	0.00805974	1.49237
Ndufc1	0.257352	5.63555	5.35113	9.67866e-05	0.00818165	1.50542
LOC103690962	-0.590206	3.13884	-5.35106	9.67976e-05	0.00818165	1.58467
Ssh2	-0.273723	5.79308	-5.34614	9.76728e-05	0.00819944	1.48803
Trnw	0.822608	3.7513	5.38759	9.81888e-05	0.00819944	1.6031
Tnrc6a	-0.247509	6.96833	-5.34144	9.85159e-05	0.00819944	1.44791
Atrn	-0.264863	9.29984	-5.33644	9.94215e-05	0.00823281	1.46893
Slc19a3	-0.703542	1.27512	-5.32436	0.000101645	0.00834537	1.32189
Mpc1	0.288721	7.13406	5.32351	0.000101804	0.00834537	1.4151
Pgp	0.25992	5.89492	5.29587	0.000107095	0.0086941	1.39136
Skp1	0.2216	9.01397	5.29541	0.000107187	0.0086941	1.38845
Lrp2	-0.533494	4.89986	-5.29704	0.000108049	0.0086941	1.45054
Zzef1	-0.232324	6.53641	-5.29033	0.00010819	0.0086941	1.35941
Col5a3	-0.404322	5.46853	-5.28158	0.000109943	0.00874674	1.39078
LOC102553825	-0.50165	3.96798	-5.28063	0.000110136	0.00874674	1.48222
Ppia	0.229082	9.37234	5.27694	0.000110884	0.00874674	1.36234
Tbca	0.236456	5.67813	5.27642	0.00011099	0.00874674	1.36744
LOC100912557	0.284411	5.42924	5.26754	0.000112818	0.00879576	1.36693
Sdk1	-0.394257	4.54614	-5.2644	0.000113471	0.00879576	1.42491
Erlec1	0.25896	6.81798	5.26204	0.000113965	0.00879576	1.30361
Pan3	-0.296872	5.51825	-5.26039	0.000114312	0.00879576	1.34848
Shroom4	-0.677997	2.22338	-5.2584	0.000114732	0.00879576	1.3433
Stard9	-0.476682	5.01897	-5.25785	0.000114847	0.00879576	1.37989
Mpdu1	0.236296	5.9332	5.24656	0.000117259	0.00893856	1.29954
Dynlt3	0.294806	7.2772	5.24387	0.000117843	0.00894124	1.26992
Pole3	0.225551	5.75492	5.23469	0.000119852	0.00898398	1.28702
Trappc1	0.220935	5.91745	5.23464	0.000119863	0.00898398	1.27847
Huwe1	-0.278631	8.62029	-5.23376	0.000120058	0.00898398	1.26819
LOC301124	0.246359	6.41955	5.2291	0.000121093	0.00899921	1.24987
Rpl3	0.233063	8.4101	5.22789	0.000121365	0.00899921	1.25355
Cacna1g	-0.330117	6.84989	-5.21953	0.00012325	0.00909763	1.22573
Pnpo	0.314496	6.70869	5.21532	0.000124213	0.00912104	1.21917
Disc1	-0.538456	3.37824	-5.21326	0.000124685	0.00912104	1.3655
Arl6ip1	0.231886	8.20559	5.20306	0.000127057	0.00924092	1.20461
Igsf9b	-0.457666	4.29557	-5.20136	0.000127457	0.00924092	1.32869
Psmd6	0.24781	6.81481	5.19849	0.000128134	0.00924886	1.18694
Hdhd2	0.280117	5.89807	5.19412	0.000129173	0.00928283	1.20542
Bsn	-0.445415	7.09706	-5.19589	0.00013033	0.00929215	1.17192
Pfdn1	0.230458	6.14527	5.18884	0.000130442	0.00929215	1.18468
Atp5c1	0.23068	7.89242	5.18395	0.000131628	0.00933543	1.1652
Ndufv2	0.278594	7.43133	5.18162	0.000132194	0.00933543	1.15645
Uqcrh	0.270322	7.11146	5.17884	0.000132878	0.00934326	1.14979
Cox7a2	0.302965	6.72272	5.17471	0.000133898	0.00937068	1.14421
Trnl1	0.771009	6.07369	5.36141	0.000134417	0.00937068	1.2247
Ttc28	-0.316269	5.12629	-5.16494	0.000136341	0.00946438	1.20247
Arhgap21	-0.213388	7.70297	-5.15865	0.000137938	0.00950855	1.11653
Rpl12	0.21539	6.81827	5.15623	0.000138561	0.00950855	1.10895
Dynlrb1	0.257478	7.34733	5.15442	0.000139025	0.00950855	1.1057
Prrc2a	-0.231827	8.72627	-5.15232	0.000139567	0.00950855	1.1207
Eif3m	0.203496	6.20908	5.14915	0.00014039	0.00950855	1.10922
Atp6v1f	0.225338	6.67272	5.14883	0.000140475	0.00950855	1.09698
Eef1a1	0.292912	10.4082	5.14372	0.000141812	0.00952478	1.14315
Nav3	-0.294635	5.33839	-5.14345	0.000141882	0.00952478	1.14747
LOC102552626	-0.707867	0.814244	-5.12635	0.00014646	0.00970521	0.96301
Psmd14	0.220789	6.13894	5.12598	0.00014656	0.00970521	1.06918
Zmiz1	-0.289349	7.50559	-5.12323	0.000147311	0.00970521	1.04932
Igbp1	0.277582	5.04528	5.12285	0.000147415	0.00970521	1.13159
Glo1	0.234904	6.68258	5.11946	0.000148347	0.00970521	1.04259
Pom121	-0.277438	6.48143	-5.11866	0.000148568	0.00970521	1.0452
Rps3a	0.278752	7.56666	5.11425	0.000149792	0.00970521	1.03318
Caskin2	-0.277268	5.84238	-5.11272	0.000150218	0.00970521	1.05891
Hivep3	-0.322453	5.25918	-5.11254	0.000150266	0.00970521	1.09689
Atp6v1e1	0.264114	8.16334	5.11164	0.000150519	0.00970521	1.0355
Psmb1	0.306456	7.19712	5.1027	0.000153042	0.009829	1.00939
Csmd3	-0.402334	4.37734	-5.09293	0.000155852	0.00990002	1.12972
Yae1d1	0.216505	5.13211	5.09226	0.000156045	0.00990002	1.06873
Gpr75	-0.412714	4.26074	-5.09223	0.000156055	0.00990002	1.13614
Arap3	-0.447292	3.6601	-5.09044	0.000156575	0.00990002	1.15657
Eif3e	0.194521	5.87105	5.08588	0.00015791	0.00994587	1.00739
Pik3c2b	-0.412933	5.83941	-5.07243	0.000161918	0.0101039	0.985533
Tnks	-0.313928	6.40284	-5.07012	0.000162617	0.0101039	0.957509
Ndufb6	0.253362	5.86877	5.07002	0.000162649	0.0101039	0.978359
Slc38a10	0.236288	6.02175	5.06674	0.000163646	0.0101039	0.964712
Rprd2	-0.232837	5.98876	-5.06502	0.000164171	0.0101039	0.963243
RGD1310951	-0.28792	5.10313	-5.06422	0.000164417	0.0101039	1.02028
Pdcl	0.234146	4.58825	5.06312	0.000164755	0.0101039	1.05945
Psmb4	0.247643	6.64134	5.05443	0.000167449	0.0102243	0.922704
Zfp362	-0.249721	4.34879	-5.05276	0.000167971	0.0102243	1.05885
Shank1	-0.320256	8.02347	-5.05001	0.000168835	0.0102387	0.919367
Dicer1	-0.210032	6.26254	-5.03996	0.000172035	0.0103941	0.905503
Med12	-0.335498	5.62648	-5.03624	0.000173236	0.010428	0.930876
Snhg4	0.818633	1.97617	5.03365	0.000174077	0.0104401	0.959478
Drp2	-0.350663	6.1721	-5.02922	0.000175524	0.0104884	0.889446
Epc1	-0.22229	5.25606	-5.02666	0.000176368	0.0105003	0.938998
Svep1	-0.694706	2.33764	-5.01849	0.000179083	0.0106232	0.969982
Dido1	-0.243312	6.10995	-5.01394	0.000180617	0.0106475	0.8631
Asxl3	-0.480473	3.42566	-5.01149	0.000181447	0.0106475	1.01983
Atp8a1	-0.351	8.40531	-5.01147	0.000181451	0.0106475	0.853935
Sco1	0.305445	4.08279	5.00617	0.000183264	0.0107154	0.992241
Tmem70	0.191821	5.53851	4.99674	0.000186529	0.0108673	0.862747
Mycbp2_1	-0.265015	8.13532	-4.99419	0.000187422	0.0108805	0.817092
Map3k2	-0.411159	2.70306	-4.99208	0.000188164	0.0108848	0.956843
Tm9sf4	-0.190335	6.2791	-4.98823	0.000189528	0.0108869	0.808627
Dscaml1	-0.352036	5.04696	-4.98821	0.000189535	0.0108869	0.885746
Fgd5	-0.630806	3.97537	-4.97607	0.000196083	0.0112235	0.936731
Idh1	0.219897	6.6256	4.96365	0.000198477	0.0113208	0.753738
Pitpnm3	-0.339337	5.977	-4.9544	0.000201955	0.0114791	0.758845
Gdpd2	-0.373127	5.2477	-4.95148	0.000203067	0.0115022	0.80173
Plxnb1	-0.248642	7.72876	-4.94822	0.000204315	0.0115328	0.725935
Trnm	0.665148	7.73839	5.08531	0.000205408	0.0115546	0.772957
Lmf2	-0.296551	5.1853	-4.94184	0.000206783	0.0115919	0.788432
Pop4	0.249319	4.7467	4.93681	0.000208747	0.011662	0.816083
Cfap36	0.177869	7.40706	4.93147	0.000210855	0.0117395	0.691466
Msrb1	0.286222	4.92763	4.92848	0.000212046	0.0117657	0.78516
Nedd8	0.19272	6.5806	4.92348	0.000214053	0.0118266	0.679373
Szt2	-0.281245	5.72333	-4.92214	0.000214594	0.0118266	0.71255
Gltscr1	-0.313171	4.84467	-4.91156	0.000218915	0.0120046	0.761689
Angptl4	-0.830026	2.5354	-4.91063	0.000219296	0.0120046	0.808465
mt-Rnr1	0.436574	10.6663	4.90471	0.000221759	0.0120593	0.708855
Ncoa6	-0.322995	5.80822	-4.90468	0.000221773	0.0120593	0.675055
Usp24	-0.238466	6.93266	-4.89693	0.000225037	0.0121961	0.625637
Celf2	-0.254914	6.69669	-4.89329	0.000226588	0.0122395	0.621045
Atp5g3	0.202624	8.02798	4.89121	0.00022748	0.0122472	0.622813
Cic	-0.191675	7.27774	-4.88528	0.000230041	0.0122964	0.603978
Nos3	-0.519354	2.79048	-4.88428	0.000230474	0.0122964	0.781187
Ndufs4	0.20217	6.89694	4.88341	0.000230855	0.0122964	0.600219
Zfp236	-0.297688	4.61172	-4.87944	0.000232589	0.0122964	0.723107
Rpl21	0.21595	7.97158	4.87897	0.000232796	0.0122964	0.599073
Htt	-0.237207	7.29503	-4.87869	0.000232918	0.0122964	0.591759
Bptf	-0.267863	6.95565	-4.87687	0.000233722	0.0122991	0.587926
Kcnip3	0.42259	5.18459	4.87332	0.000235296	0.0123421	0.662044
Mast3	-0.23667	6.49072	-4.87121	0.000236233	0.0123483	0.583566
Rpl9	0.215353	7.48202	4.86887	0.00023728	0.0123483	0.574629
Ep400	-0.274903	7.00238	-4.86584	0.000238644	0.0123483	0.567035
Brwd1	-0.278942	5.88518	-4.8654	0.000238845	0.0123483	0.596921
Paip2b	0.204818	6.35978	4.86461	0.0002392	0.0123483	0.574521
E2f2	0.391247	2.49727	4.86234	0.00024023	0.0123624	0.725261
Slc25a48	0.949987	1.29145	4.85436	0.00024388	0.0124784	0.60512
Atp5b	0.224807	10.436	4.85407	0.000244015	0.0124784	0.608541
Celsr3	-0.406885	5.99589	-4.85224	0.000244863	0.0124827	0.567241
Atp1b3	0.217456	7.38746	4.8341	0.000253416	0.0128671	0.508394
Nxpe1	-0.679784	1.75778	-4.83292	0.000253983	0.0128671	0.616159
Rpl7	0.221886	7.69139	4.8309	0.000254955	0.0128764	0.505246
Emc4	0.277844	6.49245	4.8291	0.000255829	0.0128807	0.504251
RGD1562987	0.203883	6.62835	4.82279	0.000258907	0.0129952	0.489247
Atp5o	0.252631	7.65747	4.82111	0.000259733	0.0129952	0.486432
Cript	0.232872	5.8407	4.81957	0.000260494	0.0129952	0.513068
Psmc2	0.231248	7.24778	4.81725	0.00026164	0.0130126	0.475747
Fh	0.254738	6.51928	4.81355	0.000263483	0.0130288	0.474225
Ndufa5	0.252434	6.3944	4.8114	0.000264558	0.0130288	0.473489
Trim54	0.802346	0.900128	4.81047	0.000265023	0.0130288	0.495457
RGD1310081	-0.349577	5.22853	-4.80914	0.000265693	0.0130288	0.538676
Srgn	-0.439202	3.67536	-4.80862	0.00026596	0.0130288	0.65898
Dctn3	0.21253	5.79865	4.80355	0.000268526	0.0130819	0.48539
Rev3l	-0.319387	6.07701	-4.80332	0.000268647	0.0130819	0.470797
Abcc9	-0.614159	3.75903	-4.79998	0.000270356	0.0131259	0.640732
Eif2s2	0.188531	6.5703	4.7863	0.000277471	0.0133965	0.421501
Cspg4	-0.391668	4.53831	-4.78499	0.000278159	0.0133965	0.556555
Ubr2	-0.221085	6.68445	-4.78455	0.000278392	0.0133965	0.416333
Polr2g	0.242542	5.06314	4.78084	0.000280364	0.0134197	0.499296
Slc25a5	0.196458	8.00148	4.78055	0.000280519	0.0134197	0.414114
Atf7ip	-0.243884	6.47834	-4.77389	0.000284093	0.0135509	0.400488
Zfhx3	-0.450123	5.88474	-4.77788	0.000289928	0.0136882	0.411919
Pir	0.325558	4.37062	4.76256	0.000290281	0.0136882	0.52949
Oprm1	-0.476566	3.702	-4.76179	0.000290706	0.0136882	0.574319
Col4a2	-0.53955	5.53507	-4.80809	0.000290869	0.0136882	0.444815
Grin2b	-0.384102	5.77522	-4.76013	0.000291628	0.0136882	0.406328
Ncam1	-0.29728	9.55378	-4.75883	0.00029235	0.0136882	0.406745
Celsr2	-0.315587	7.71607	-4.75794	0.000292846	0.0136882	0.36784
Mpp2	-0.270969	6.77461	-4.75496	0.000294511	0.0137027	0.359317
Gcn1l1	-0.207631	6.75031	-4.75404	0.000295028	0.0137027	0.357659
Bzw1	0.167049	7.74446	4.7514	0.000296513	0.0137027	0.355677
Dcc	-0.390304	4.85006	-4.7514	0.000296516	0.0137027	0.465306
Capn15	-0.225688	5.50585	-4.73857	0.000303847	0.0139649	0.383495
Cttnbp2	-0.286501	6.00913	-4.73769	0.000304356	0.0139649	0.350137
Arhgef38	0.702664	1.63416	4.73604	0.000305318	0.0139649	0.449557
Ndufs3	0.195516	6.45596	4.7345	0.000306212	0.0139649	0.326283
Shisa6	-0.426556	5.64594	-4.73938	0.000306469	0.0139649	0.368249
Adamts20	-0.446403	3.64842	-4.73197	0.000307694	0.0139816	0.523015
LOC102551693	0.604866	3.08204	4.7297	0.000309028	0.0140033	0.526033
Dhx34	-0.247995	3.86829	-4.72769	0.000310218	0.0140183	0.503695
LOC108351942	1.39973	0.802224	4.78898	0.000311416	0.0140335	0.355794
Elmsan1	-0.222136	5.08488	-4.72323	0.000312865	0.0140599	0.389863
Nnmt	0.804768	1.16586	4.72033	0.000314603	0.0140779	0.382262
Cdk5rap2	-0.249524	5.36991	-4.71968	0.000314991	0.0140779	0.358764
Rpl18a	0.220579	7.29983	4.71566	0.000317418	0.0140869	0.28382
Ndufa6	0.292491	6.34766	4.7155	0.000317516	0.0140869	0.293823
Fmo5	0.627128	1.64227	4.71401	0.000318421	0.0140869	0.414791
Afdn	-0.246832	6.66025	-4.71364	0.000318645	0.0140869	0.282556
Med13	-0.284619	5.62019	-4.70745	0.000322431	0.0142157	0.31674
Prdx5	0.236575	7.12897	4.70006	0.000327012	0.0143566	0.25349
Rpl36a	0.253312	5.79582	4.69946	0.000327386	0.0143566	0.289507
Gan	-0.27594	4.82988	-4.6977	0.000328491	0.0143664	0.366396
Kank3	-0.463772	2.63936	-4.69538	0.000329947	0.0143732	0.452434
Pcdh10	-0.377598	6.69393	-4.6937	0.000331007	0.0143732	0.244698
Ets1	-0.436478	4.20478	-4.69326	0.00033129	0.0143732	0.417301
Rps3	0.24152	7.53592	4.68924	0.000333843	0.0144084	0.235607
LOC100359816	-0.33327	5.62727	-4.68728	0.000335094	0.0144084	0.278494
Bcap31	0.226494	6.84073	4.68713	0.000335191	0.0144084	0.229736
Rpl37a	0.199166	7.06555	4.68606	0.000335877	0.0144084	0.226753
Eif4a2	0.181319	9.14729	4.68507	0.000336517	0.0144084	0.257094
Ublcp1	0.236468	6.80484	4.68311	0.000337779	0.0144246	0.222438
Atp5h	0.226318	7.35965	4.68169	0.000338698	0.0144261	0.219705
Lgals1	0.337892	5.54386	4.67885	0.000340541	0.0144644	0.268401
Eif1a	0.203057	5.33938	4.67758	0.000341372	0.0144644	0.281623
Nckap5l	-0.247921	5.14201	-4.67574	0.000342572	0.0144777	0.295766
Cd59	0.278441	8.37298	4.6627	0.000351226	0.0147487	0.197274
Tnfrsf25	-0.741183	0.656487	-4.66236	0.000351455	0.0147487	0.240283
Cdk9	0.192674	5.95238	4.66155	0.000352004	0.0147487	0.208282
Prdm11	-0.256228	4.78234	-4.65897	0.000353747	0.0147487	0.298549
Bnip3	0.283363	7.11	4.65889	0.000353799	0.0147487	0.175252
Sdhd	0.212717	6.82185	4.65799	0.00035441	0.0147487	0.174441
Otos	0.649674	0.375765	4.65532	0.000356224	0.0147865	0.199469
LOC691387	-0.409801	3.73426	-4.65329	0.000357615	0.0148065	0.377261
RGD1308428	-0.2061	5.56271	-4.64715	0.000361845	0.0149437	0.206627
Nup214_1	-0.250169	5.5658	-4.63703	0.000368935	0.0151096	0.187442
Hars	0.199182	6.6794	4.63634	0.00036942	0.0151096	0.134981
Kif17	-0.337996	3.25683	-4.63527	0.00037018	0.0151096	0.360599
Atp5g1	0.25986	6.68563	4.63456	0.000370684	0.0151096	0.131645
Wdhd1	-0.404029	2.92725	-4.63293	0.000371845	0.0151096	0.354874
Cmpk1	0.187746	6.89976	4.63104	0.000373196	0.0151096	0.122457
Pitpnm2	-0.341203	6.94998	-4.62952	0.000374284	0.0151096	0.119852
Ndufa7	0.232689	5.60802	4.62467	0.000377783	0.0151096	0.16058
Gse1	-0.27791	6.24571	-4.62356	0.000378592	0.0151096	0.122977
Creb3	0.208514	6.0953	4.62353	0.000378612	0.0151096	0.128901
Rps18	0.209174	6.53596	4.62257	0.00037931	0.0151096	0.111581
Mrpl17	0.219821	6.45181	4.6225	0.000379361	0.0151096	0.113648
Rps7	0.236574	7.53083	4.62082	0.000380583	0.0151096	0.105327
Sv2b	0.589466	6.82647	4.72327	0.000380658	0.0151096	0.147519
Ncor1	-0.239252	6.98829	-4.61958	0.000381492	0.0151096	0.10042
Psmc6	0.235955	6.59225	4.61854	0.000382254	0.0151096	0.10274
Baz2b	-0.297999	6.04499	-4.61833	0.000382408	0.0151096	0.122044
Rpl23	0.202265	7.05177	4.61816	0.000382534	0.0151096	0.0974546
Gstp1	0.227558	7.12088	4.61672	0.000383593	0.0151149	0.0948091
Strap	0.2165	6.10407	4.61069	0.000388056	0.0151526	0.104089
NEWGENE_1305560	-0.345487	4.16325	-4.61002	0.000388557	0.0151526	0.26723
Mrps18c	0.287053	4.18183	4.60946	0.000388976	0.0151526	0.264064
Lyst	-0.275265	5.84341	-4.60766	0.000390323	0.0151526	0.112851
Eif5a	0.197565	7.96672	4.60712	0.000390727	0.0151526	0.0844227
Rpl24	0.204	7.23982	4.60706	0.000390769	0.0151526	0.076778
Cacna1d	-0.400414	5.94836	-4.61102	0.000391053	0.0151526	0.107499
Zmat2	0.212311	6.26511	4.60436	0.000392806	0.0151845	0.0852332
Cdc42bpb	-0.189783	7.40571	-4.60057	0.000395678	0.015252	0.0655313
Dclk2	-0.24007	6.78239	-4.5989	0.00039695	0.015252	0.0624116
Phb	0.197965	6.52321	4.59836	0.000397359	0.015252	0.0656723
Srrm2	-0.252932	9.39537	-4.59278	0.000401642	0.0153697	0.0883304
LOC102546572	-0.198828	6.42877	-4.59192	0.00040231	0.0153697	0.0560566
Rps14	0.254796	6.84771	4.58991	0.000403868	0.0153932	0.0444759
Cept1	0.183808	5.79057	4.58339	0.000408963	0.0155277	0.069378
Uqcrfs1	0.239561	7.16147	4.58142	0.000410517	0.0155277	0.0275102
Emc2	0.224604	6.1004	4.58058	0.000411179	0.0155277	0.0469013
Tmem9	0.261584	5.78341	4.57999	0.000411647	0.0155277	0.063674
Vps41	0.224517	8.2475	4.57934	0.000412156	0.0155277	0.0360753
Wnt9b	0.677821	0.482055	4.57562	0.000415119	0.0156033	0.0881974
Lrrc8c	-0.357869	5.00822	-4.57263	0.000417514	0.0156572	0.115038
Gimap8	-0.531523	2.12617	-4.56579	0.00042305	0.0158285	0.205182
Hspe1	0.234616	5.5679	4.56177	0.000426335	0.0159149	0.0441912
Zfp319	-0.272432	3.68203	-4.55752	0.000429841	0.0160091	0.20628
Crtc1	-0.215104	6.53411	-4.55509	0.000431859	0.0160252	-0.0170467
Cct2	0.21302	7.61906	4.55398	0.000432775	0.0160252	-0.0214362
Tmem265	-0.407831	1.91793	-4.55218	0.00043428	0.0160252	0.169291
Emc7	0.20314	6.4568	4.55181	0.000434595	0.0160252	-0.0214914
Speg	-0.273607	6.14184	-4.54934	0.000436664	0.0160252	-0.0142556
Ndufb8	0.210394	7.52226	4.54885	0.000437077	0.0160252	-0.0322709
Clta	0.201386	7.6783	4.54877	0.000437149	0.0160252	-0.030763
Mrpl12	0.226151	5.72327	4.5431	0.000441953	0.0161623	-0.00269266
Gpr63	-0.326644	3.72036	-4.54202	0.000442871	0.0161623	0.175947
Hdac4	-0.203779	5.84967	-4.53654	0.000447571	0.0162974	-0.0233497
Arpc5l	0.191212	5.63353	4.53416	0.000449636	0.0163361	-0.0134486
Rpl31	0.222031	7.20309	4.53057	0.000452757	0.0164129	-0.0696677
Pon2	0.209184	7.07577	4.52858	0.0004545	0.0164184	-0.0738231
Egfr	-0.352413	5.23934	-4.5281	0.00045492	0.0164184	0.00884316
Hook3	-0.24592	4.54417	-4.52218	0.00046015	0.0165552	0.0667517
Atp6v1h	0.260855	7.33447	4.52151	0.00046074	0.0165552	-0.0862187
Pdhb	0.195598	7.36797	4.52017	0.000461934	0.0165587	-0.0886119
Gapdh	0.224759	11.0402	4.51816	0.000463735	0.0165587	-0.00695171
Cops6	0.1908	6.8624	4.51697	0.000464796	0.0165587	-0.0953531
Nifk	0.262436	4.86051	4.51686	0.0004649	0.0165587	0.0236364
Vps13d	-0.231724	7.27091	-4.51213	0.000469163	0.0166558	-0.104607
Scfd1	0.249348	5.59038	4.51157	0.000469667	0.0166558	-0.053034
Rplp1	0.270274	6.9015	4.50501	0.000475656	0.0168263	-0.1184
Ptprz1	-0.316521	8.41312	-4.50405	0.000476538	0.0168263	-0.10452
Adgrl1	-0.260769	7.90507	-4.50253	0.00047794	0.0168394	-0.116374
mt-Rnr2	0.465548	11.0075	4.51306	0.000480766	0.016877	-0.0375659
LOC102554501	-0.529007	1.46531	-4.49816	0.000481991	0.016877	0.0506156
Asxl2	-0.385059	5.37998	-4.49803	0.000482112	0.016877	-0.0605625
Fis1	0.253009	7.02459	4.49392	0.000485963	0.0169754	-0.140201
Smg1	-0.331621	7.45486	-4.49121	0.000488516	0.0170113	-0.143253
Adpgk	0.302993	6.6401	4.48999	0.000489666	0.0170113	-0.143892
Pou2f1	-0.276866	4.14569	-4.48942	0.000490205	0.0170113	0.045503
Psmb7	0.224564	7.21622	4.48705	0.000492456	0.0170113	-0.153086
Arfgef3	-0.367615	6.51877	-4.4856	0.00049384	0.0170113	-0.149137
Rpp14	0.245909	4.76414	4.48522	0.000494201	0.0170113	-0.0260789
Napg	0.27066	7.23302	4.48513	0.000494291	0.0170113	-0.156625
Tnik	-0.206628	7.07027	-4.48197	0.000497317	0.0170794	-0.16314
Nit1	0.255636	5.66609	4.4805	0.000498733	0.0170921	-0.117945
RGD1309108	0.484223	2.5377	4.47738	0.000501759	0.0170993	0.074367
Mkks	0.211013	5.66632	4.47694	0.000502179	0.0170993	-0.124987
Tmem131	-0.201862	6.37232	-4.47632	0.000502785	0.0170993	-0.163378
Rnf115	0.170191	6.33082	4.47596	0.000503136	0.0170993	-0.162877
Sdc1	1.35428	3.16933	4.65562	0.000505292	0.0171143	0.125724
Slc25a11	0.195692	6.64441	4.47336	0.000505676	0.0171143	-0.176273
Zfp462	-0.308739	6.02703	-4.46743	0.000511508	0.0172758	-0.165135
Ptpro	-0.477227	5.12593	-4.48227	0.00051337	0.0173029	-0.0909026
Gbe1	0.298113	5.27472	4.46346	0.000515461	0.0173155	-0.117908
Cfl2	0.215257	7.09908	4.46147	0.000517445	0.0173155	-0.202595
Got2	0.212227	8.3346	4.46114	0.000517774	0.0173155	-0.188534
Auh	0.275691	6.89546	4.46093	0.000517991	0.0173155	-0.203016
Dagla	-0.263864	5.93566	-4.45841	0.000520517	0.0173309	-0.177596
Ttc1	0.271241	6.14628	4.45836	0.000520574	0.0173309	-0.18889
Atp5j	0.200884	7.25312	4.45551	0.000523453	0.0173707	-0.213525
Pcdh1	-0.385371	5.40367	-4.45507	0.000523899	0.0173707	-0.144451
Ushbp1	-0.682257	1.7334	-4.45369	0.000525303	0.0173718	-0.00562785
Arntl	-0.287136	4.57122	-4.45276	0.00052625	0.0173718	-0.0661346
Nf1	-0.240261	7.08674	-4.4519	0.000527127	0.0173718	-0.220861
Cox6a1	0.22327	8.12132	4.44703	0.000532124	0.0175011	-0.219625
Tnr	-0.295664	6.72495	-4.44486	0.000534368	0.0175395	-0.231893
Ptpmt1	0.246655	5.08585	4.43695	0.000542626	0.0177446	-0.150645
Spn	0.571227	1.76137	4.43626	0.000543349	0.0177446	-0.0328351
Ddx25	0.286972	5.40387	4.43566	0.000543984	0.0177446	-0.18247
Tcta	0.199927	5.43301	4.43473	0.000544966	0.0177446	-0.187146
Acacb	-0.335328	4.61514	-4.43228	0.000547558	0.0177659	-0.10906
Eif2s1	0.203193	5.55734	4.43158	0.000548303	0.0177659	-0.203417
Cd34	-0.606558	2.59728	-4.43103	0.000548888	0.0177659	-0.00400157
Upf1	-0.161869	6.488	-4.42727	0.00055291	0.0178606	-0.261268
Mrpl48	0.242337	5.91505	4.42243	0.000558122	0.0179719	-0.245788
Uqcrc1	0.211364	7.98745	4.42203	0.000558557	0.0179719	-0.269891
Numa1	-0.184129	7.36741	-4.41721	0.000563809	0.0181051	-0.286434
Vapa	0.192385	7.60589	4.41566	0.00056551	0.0181241	-0.287136
Cpne9	0.771335	4.97508	4.54804	0.000569389	0.0182126	-0.125125
Prex1	-0.184529	7.4738	-4.40929	0.000572547	0.0182689	-0.300752
Otof	-0.646089	3.12535	-4.40853	0.000573388	0.0182689	-0.0405593
Phc1	-0.184494	5.51157	-4.40432	0.000578096	0.0183223	-0.251753
Tet2	-0.329687	5.14805	-4.40371	0.000578784	0.0183223	-0.219157
Chrnb4	-0.876862	2.48421	-4.42575	0.000580571	0.0183223	-0.051311
LOC108351685	-0.51016	0.571363	-4.40211	0.000580587	0.0183223	-0.174573
Apc	-0.223431	8.22376	-4.40202	0.00058068	0.0183223	-0.304305
Uqcrc2	0.181936	8.29104	4.39811	0.000585111	0.0184265	-0.310608
Snx25	0.21528	5.84099	4.39155	0.00059262	0.018627	-0.300599
Map3k13	-0.337913	4.72287	-4.38457	0.000600713	0.0188451	-0.210919
Vps13b	-0.221207	6.38305	-4.37948	0.000606692	0.0189468	-0.349923
Uqcrb	0.216861	6.30579	4.37943	0.000606747	0.0189468	-0.347462
Alk	-0.453131	4.87649	-4.38325	0.000607439	0.0189468	-0.235448
Akr1a1	0.199011	8.60712	4.37715	0.000609439	0.0189729	-0.344108
Hspa2	0.4065	4.8272	4.37465	0.000612418	0.0190293	-0.240955
Aco1	-0.176199	5.8822	-4.36875	0.000619485	0.0192123	-0.346994
Kcnk9	-0.388567	5.9571	-4.37056	0.000622588	0.0192719	-0.353215
Nectin1	-0.304381	6.16724	-4.36311	0.000626323	0.0193508	-0.372644
Actr10	0.190227	6.77561	4.36077	0.000629179	0.0194023	-0.395102
Cacna1b	-0.457901	6.55021	-4.39736	0.000630562	0.0194082	-0.374505
Scarb1	-0.32006	4.85273	-4.35669	0.000634192	0.019464	-0.278108
Ints1	-0.172563	6.15661	-4.35623	0.000634761	0.019464	-0.385938
N4bp1	-0.306303	5.73196	-4.35501	0.000636276	0.0194739	-0.362688
Shb	0.296087	4.0877	4.35231	0.000639632	0.0195399	-0.204139
Cops4	0.187651	6.33919	4.35118	0.000641034	0.0195462	-0.403258
Psma6	0.18455	6.71398	4.34897	0.000643809	0.0195941	-0.417032
Ptprg	-0.212045	5.8493	-4.34535	0.000648366	0.0196678	-0.389797
Rpl11	0.207485	7.01168	4.34513	0.000648639	0.0196678	-0.426833
Unc13a	-0.29426	6.25073	-4.34393	0.000650158	0.0196772	-0.413261
Psmc3	0.183259	7.13131	4.33726	0.000658664	0.0198978	-0.442031
Cops2	0.201208	7.26964	4.33609	0.00066017	0.0199064	-0.443679
Gpr17	-0.349991	5.73588	-4.33288	0.000664307	0.0199942	-0.405194
Adtrp	-0.635706	0.905115	-4.32549	0.00067395	0.0202166	-0.270431
Btf3	0.215432	6.9253	4.32532	0.000674175	0.0202166	-0.464839
Immt	0.173109	7.65484	4.32346	0.000676622	0.0202527	-0.464482
Mrpl13	0.194565	5.33216	4.32066	0.000680332	0.020294	-0.396551
Tmem2	-0.349	4.11594	-4.32054	0.000680488	0.020294	-0.265735
Ppp1cc	0.160259	7.65809	4.31941	0.000681995	0.0202957	-0.472288
Tax1bp1	0.173604	7.82999	4.31863	0.000683033	0.0202957	-0.471625
Vdac3	0.197136	7.95327	4.3154	0.000687351	0.0203868	-0.476099
Nol4l	-0.235599	5.46174	-4.30696	0.000698766	0.0206618	-0.434105
Ptprt	-0.374228	8.57754	-4.31091	0.000699154	0.0206618	-0.478581
Calm2	0.235874	8.5745	4.30515	0.000701233	0.0206857	-0.483718
Ncor2	-0.244491	7.80811	-4.29988	0.000708479	0.0208613	-0.508094
Cnih1	0.230629	6.37225	4.29852	0.000710374	0.0208613	-0.506052
Ccnh	0.221056	4.32737	4.29805	0.000711022	0.0208613	-0.331352
Taf9	0.209595	5.25864	4.29462	0.000715799	0.0209359	-0.439565
RGD1305587	0.25166	4.36962	4.29438	0.000716131	0.0209359	-0.342854
Nfatc2	0.294758	5.73841	4.29329	0.000717658	0.020943	-0.482366
Zmynd8	-0.175989	6.88576	-4.29092	0.000720994	0.0210028	-0.53112
LOC102547266	-0.496863	1.71943	-4.28743	0.000725928	0.0211089	-0.284024
Rpl10a	0.212927	6.53139	4.28409	0.000730684	0.0212093	-0.538781
RGD1565616	-0.229944	8.02709	-4.27729	0.000740458	0.0214549	-0.548584
Arhgap31	-0.404583	4.58013	-4.27531	0.00074333	0.0214999	-0.401388
Tbc1d16	-0.253461	4.72328	-4.27106	0.000749521	0.0216363	-0.427041
Zfp318	-0.204112	5.7149	-4.27019	0.000750794	0.0216363	-0.525375
Uba3	0.168845	6.60538	4.26936	0.000752026	0.0216363	-0.569103
Ngfr	-0.501424	3.41766	-4.26738	0.000754943	0.0216773	-0.306348
Ccndbp1	0.250897	5.60367	4.26554	0.000757662	0.0216773	-0.525808
Gls	0.352661	8.26446	4.26549	0.000757739	0.0216773	-0.567034
Mrpl20	0.21637	5.30884	4.26479	0.000758766	0.0216773	-0.501549
Whsc1l1	-0.225779	6.7672	-4.26	0.000765922	0.0218167	-0.589715
Esrra	0.23154	6.17263	4.25884	0.000767657	0.0218167	-0.574785
Rbbp7	0.177218	6.88323	4.25877	0.000767753	0.0218167	-0.593476
Psmd8	0.180798	6.49273	4.25672	0.000770849	0.0218167	-0.590862
Timm8b	0.190286	6.3967	4.25602	0.000771909	0.0218167	-0.589269
Ndufa10l1	-1.24128	3.80656	-4.44691	0.000773786	0.0218167	-0.281221
Cdon	-0.403978	5.01168	-4.25407	0.000774857	0.0218167	-0.490295
Tsc2	-0.191033	6.67235	-4.25313	0.000776272	0.0218167	-0.601679
RGD1306739	0.324936	4.51339	4.25287	0.000776668	0.0218167	-0.437274
Atp6v0b	0.227647	6.26666	4.25195	0.000778075	0.0218167	-0.592185
Slc4a8	-0.325112	6.36009	-4.25176	0.000778356	0.0218167	-0.595463
Adgre5	-0.455333	3.29921	-4.25085	0.000779747	0.0218182	-0.330437
Lrig2	-0.25217	5.54889	-4.24687	0.000785847	0.021901	-0.556999
Magi1	-0.225014	6.73371	-4.24575	0.000787574	0.021901	-0.616904
Atp6ap1	0.163961	8.47042	4.24543	0.000788069	0.021901	-0.601646
Sar1b	0.198156	5.86801	4.24538	0.000788139	0.021901	-0.58409
Cdh22	-0.307891	4.62934	-4.24455	0.00078942	0.021901	-0.466288
Tnrc6b	-0.238911	7.15012	-4.24176	0.000793752	0.0219559	-0.62678
Prg2	0.884492	0.256365	4.24154	0.00079409	0.0219559	-0.454782
Vps25	0.174879	5.71392	4.24021	0.000796158	0.0219639	-0.583469
Morf4l1	0.177062	8.67334	4.23937	0.000797466	0.0219639	-0.608591
Tanc2	-0.277378	7.37302	-4.23877	0.000798418	0.0219639	-0.631253
Bicd2	-0.204267	6.86615	-4.23745	0.00080047	0.0219833	-0.634547
Pag1	-0.504876	2.10856	-4.23501	0.000804312	0.0220517	-0.357214
Rabggtb	0.208272	6.34644	4.23308	0.000807362	0.0220981	-0.631914
Slc6a6	-0.31502	6.70485	-4.23182	0.000809351	0.0221031	-0.643107
Ndufs2	0.19765	8.14674	4.23125	0.000810251	0.0221031	-0.635768
Chd7	-0.300024	5.31376	-4.22968	0.000812749	0.0221063	-0.568797
Glt1d1	0.445645	5.17702	4.24243	0.000813473	0.0221063	-0.549265
Serinc5	-0.286764	8.06861	-4.22863	0.000814434	0.0221063	-0.642105
RGD1560289	-0.399235	4.713	-4.22661	0.000817652	0.0221152	-0.509346
Dennd5b	-0.267015	5.30327	-4.22614	0.000818412	0.0221152	-0.574842
Cacna1c	-0.374285	5.60293	-4.2257	0.000819361	0.0221152	-0.601631
Selk	0.187001	6.29269	4.22422	0.000821502	0.0221152	-0.647075
Spag5	-0.261776	4.50181	-4.22419	0.000821542	0.0221152	-0.490441
Rps4x	0.192823	7.62687	4.21515	0.000836225	0.0224509	-0.674633
Tmem201	-0.310186	4.57064	-4.21482	0.000836766	0.0224509	-0.515934
Cox4i1	0.22319	8.757	4.21227	0.000840961	0.0225116	-0.659
Rpl10	0.157051	7.56657	4.21177	0.000841788	0.0225116	-0.681893
Pcdhga10	-0.276786	3.6912	-4.20907	0.000846253	0.022594	-0.433564
Scand1	0.245395	5.3391	4.20796	0.000848096	0.0226062	-0.613646
Acvr2b	-0.339525	4.56385	-4.20667	0.000850257	0.0226222	-0.530418
Slc30a9	0.172102	7.86005	4.20594	0.000851472	0.0226222	-0.689535
Ddx11	-0.519905	3.1741	-4.20467	0.000853584	0.0226415	-0.408648
Tet1	-0.427516	3.12723	-4.19912	0.000862935	0.0228523	-0.417039
Ndufa12	0.320039	5.75368	4.19829	0.000864332	0.0228523	-0.666781
Tmem44	-0.518411	2.9467	-4.19571	0.000868728	0.0229313	-0.41795
Mga	-0.279517	6.04905	-4.19148	0.000875959	0.0230485	-0.698619
Pfdn5	0.185311	5.94633	4.19146	0.000875994	0.0230485	-0.693457
Rpl36al	0.171895	5.42734	4.19063	0.000877426	0.023049	-0.655516
Rps16	0.21398	7.99327	4.18743	0.000882962	0.023143	-0.723438
Setd3	0.187436	7.11575	4.18692	0.000883839	0.023143	-0.733498
Sdhb	0.186404	7.17836	4.18135	0.000893568	0.023221	-0.744156
Pmpcb	0.168858	6.12277	4.18128	0.000893675	0.023221	-0.722869
Rpl15	0.176768	7.07681	4.18093	0.000894298	0.023221	-0.745232
Emp2	-0.529071	2.59369	-4.18073	0.000894643	0.023221	-0.441888
Xpo5	-0.191452	6.19906	-4.18036	0.000895301	0.023221	-0.728053
Akr1cl	-0.463598	2.60529	-4.18032	0.000895359	0.023221	-0.442553
Ssu72	0.202487	6.45654	4.17946	0.00089688	0.0232235	-0.739624
Ptprf	-0.229669	7.44067	-4.17558	0.000903738	0.0233278	-0.75344
Nop10	0.186504	5.95964	4.17501	0.000904757	0.0233278	-0.726139
LOC100910850	0.184013	7.28729	4.17476	0.000905196	0.0233278	-0.756367
Wdr61	0.178822	5.59271	4.17177	0.000910529	0.0234282	-0.706226
Herc1	-0.265737	7.99154	-4.17003	0.000913644	0.0234285	-0.757166
LOC100363502	0.588687	4.03512	4.19334	0.000913968	0.0234285	-0.528283
Foxj2	-0.252616	5.32003	-4.16936	0.000914852	0.0234285	-0.685947
Ubr5	-0.184984	7.73169	-4.16839	0.000916596	0.0234364	-0.764171
Trmt10c	0.229519	4.34368	4.16706	0.000918984	0.0234607	-0.580634
Mterf4	0.26974	3.543	4.16339	0.000925647	0.0235688	-0.506208
Faf1	0.215173	5.43296	4.16314	0.000926106	0.0235688	-0.708943
Ppp2r2d	0.180297	5.59356	4.16147	0.000929137	0.0235873	-0.726208
Rps24	0.208433	7.3043	4.16008	0.000931692	0.0235873	-0.784791
RGD1310081_1	-0.330933	4.31368	-4.15855	0.000934491	0.0235873	-0.592384
Aco2	0.168132	9.55175	4.15792	0.000935652	0.0235873	-0.742519
Atp6v1b2	0.272927	9.1513	4.15765	0.000936149	0.0235873	-0.754482
Idh3B	0.24143	7.46614	4.15742	0.000936564	0.0235873	-0.788535
Pde2a	-0.36803	5.81311	-4.1611	0.000936955	0.0235873	-0.74799
Ildr2	-0.485469	5.04169	-4.1833	0.000938495	0.0235896	-0.667468
Cops5	0.236589	6.20391	4.15553	0.000940053	0.0235907	-0.776517
Arhgap39	-0.206035	5.58291	-4.15479	0.000941429	0.0235907	-0.737985
Spp1	0.844462	7.15835	4.36558	0.000944162	0.0235978	-0.696334
Ago2	-0.354464	4.43015	-4.15295	0.000944838	0.0235978	-0.616589
R3hcc1	0.23643	5.7114	4.15229	0.000946053	0.0235978	-0.753107
Setbp1	-0.393145	4.33933	-4.15082	0.000948802	0.0236302	-0.609528
Nbeal1	-0.414349	4.48097	-4.14999	0.000950337	0.0236324	-0.627692
Pgk1	0.196525	9.15804	4.1485	0.000953137	0.0236496	-0.772078
Prnp	0.178165	9.46035	4.14734	0.000955301	0.0236496	-0.765701
Sdhc	0.171486	7.35501	4.1473	0.000955377	0.0236496	-0.809299
Sod2	0.195206	7.99562	4.14585	0.000958118	0.0236815	-0.80422
Klf9	-0.318374	6.06633	-4.14372	0.000962128	0.023742	-0.791999
Mdm4	-0.272489	6.94935	-4.1429	0.000963681	0.023742	-0.818597
Cramp1	-0.228158	4.64679	-4.14224	0.000964933	0.023742	-0.663866
Cops7a	0.200949	6.8825	4.13841	0.000972234	0.0238856	-0.827272
Ptprd	-0.311422	8.34553	-4.13639	0.000976108	0.0239447	-0.815815
Slc25a4	0.215791	9.43252	4.1356	0.000977621	0.0239458	-0.789268
Bcl9	-0.242832	5.52263	-4.13449	0.000979762	0.0239623	-0.77189
Cep85l	-0.280218	3.74875	-4.12833	0.000991717	0.0241948	-0.588643
Slc8a2	-0.434315	5.017	-4.1357	0.000992235	0.0241948	-0.72869
Psmc1	0.207387	7.70982	4.12528	0.000997675	0.0242912	-0.848321
Ago3	-0.280207	5.89875	-4.12452	0.000999174	0.0242914	-0.819637
Ankdd1a	-0.472884	2.21273	-4.1226	0.00100296	0.0243472	-0.548623
Plekhb1	0.39456	9.20746	4.12934	0.00101135	0.0245142	-0.823634
Sec24b	-0.169487	6.05207	-4.11598	0.00101611	0.0245863	-0.845829
Lipa	0.184545	6.00091	4.11537	0.00101733	0.0245863	-0.844278
Ube2n	0.237078	6.1325	4.11439	0.00101931	0.0245976	-0.853089
Tnrc6c	-0.2324	6.07904	-4.11052	0.0010271	0.024749	-0.85763
Crbn	0.248097	6.70257	4.10912	0.00102993	0.0247805	-0.882068
Apc2	-0.275	7.86707	-4.10786	0.0010325	0.0248059	-0.880018
Atp13a5	-0.676595	2.93706	-4.1093	0.00103725	0.0248833	-0.578238
Phf2	-0.212239	5.99478	-4.10464	0.00103906	0.0248901	-0.86448
Hip1	-0.250114	6.65084	-4.1025	0.00104346	0.0249589	-0.893834
Gdf10	-0.703957	4.27114	-4.17193	0.00104659	0.0249785	-0.661472
Cbl	-0.201529	6.57468	-4.10044	0.00104769	0.0249785	-0.896406
B3gat3	0.213587	7.18465	4.09929	0.00105008	0.0249785	-0.903832
Ino80d	-0.304269	5.23021	-4.09913	0.00105041	0.0249785	-0.812152
Ugp2	0.193014	6.98323	4.09728	0.00105424	0.0249997	-0.907924
C10H5orf58	-0.619665	1.30789	-4.09722	0.00105436	0.0249997	-0.622057
Glod4	0.200023	5.94554	4.09367	0.00106176	0.0251031	-0.883158
Rab37	0.952848	4.42969	4.25341	0.00106286	0.0251031	-0.653306
Ube2v2	0.203328	6.48612	4.09292	0.00106334	0.0251031	-0.908892
Zfp608	-0.241214	5.00657	-4.09155	0.00106622	0.0251347	-0.803175
Mrps15	0.223144	5.52729	4.08861	0.00107239	0.0252438	-0.861531
Ankhd1	-0.353896	5.87207	-4.08547	0.00108064	0.0254014	-0.894234
Txn1	0.227564	5.68688	4.08097	0.00108867	0.025506	-0.889569
Kmt5c	-0.390944	4.63583	-4.0806	0.00108947	0.025506	-0.779005
Gdi2	0.169563	8.03042	4.08046	0.00108978	0.025506	-0.930961
Cct5	0.150736	7.47815	4.07893	0.00109306	0.025546	-0.94133
Habp4	0.266437	7.40889	4.07558	0.00110031	0.0256458	-0.94846
Ccdc122	0.568981	1.73754	4.0755	0.00110048	0.0256458	-0.642271
Grm5	-0.389776	5.35474	-4.07779	0.00110356	0.0256811	-0.870441
RGD1562037	-0.473239	6.37751	-4.12581	0.00110854	0.0257412	-0.917739
Cox7a2l	0.20166	7.37579	4.07107	0.00111014	0.0257412	-0.957606
Tnrc18	-0.348491	6.67805	-4.0743	0.00111117	0.0257412	-0.954214
Cst3	0.384455	11.3023	4.06989	0.00111272	0.0257412	-0.857221
Ice1	-0.20248	6.28105	-4.0693	0.00111404	0.0257412	-0.947536
LOC689081	0.639874	0.40761	4.06852	0.00111575	0.0257443	-0.719419
Ankrd52	-0.248744	5.87054	-4.06765	0.00111766	0.0257502	-0.928466
LOC102554622	0.334225	6.27569	4.06697	0.00111916	0.0257502	-0.951498
LOC102553814	0.570087	0.331133	4.06517	0.00112314	0.0258054	-0.729774
Cct8	0.18057	7.79026	4.06446	0.00112472	0.0258054	-0.965784
St3gal5	0.162275	6.83501	4.06324	0.00112743	0.0258311	-0.973442
Ccm2l	-0.499862	1.23439	-4.06122	0.00113193	0.0258969	-0.685446
Cacna1h	-0.310692	5.46383	-4.05985	0.00113498	0.0258969	-0.91078
Pink1	0.26515	7.39988	4.05971	0.0011353	0.0258969	-0.97949
Dock3	-0.220518	7.18207	-4.05911	0.00113665	0.0258969	-0.982095
Flvcr2	-0.548987	1.97497	-4.05785	0.00113947	0.025925	-0.665896
Dennd4b	-0.213048	6.20454	-4.05658	0.00114234	0.0259541	-0.968938
Zc3h12c	-0.346612	4.22566	-4.05522	0.00114541	0.0259877	-0.777588
Psme4	-0.291063	6.60285	-4.05448	0.00114709	0.0259895	-0.986298
Cd86	0.670623	1.18564	4.05139	0.0011541	0.0260782	-0.704173
Utp3	0.18839	4.63879	4.05094	0.00115513	0.0260782	-0.837952
Nudt2	0.202976	5.17849	4.05065	0.0011558	0.0260782	-0.901323
Cad	-0.268268	5.04856	-4.0497	0.00115797	0.0260911	-0.88838
Atp6v1g1	0.191915	7.20686	4.04777	0.00116238	0.0261544	-1.00425
Anxa4	0.352743	5.18745	4.04444	0.00117005	0.0262759	-0.913391
Tjap1	-0.318853	5.15762	-4.04403	0.001171	0.0262759	-0.910833
Arid2	-0.225368	5.85741	-4.04292	0.00117356	0.0262804	-0.975774
Tusc2	0.219775	6.11216	4.04255	0.00117442	0.0262804	-0.991939
Anxa6	0.25896	7.75025	4.04009	0.00118014	0.0263721	-1.0138
Ndufb4	0.153585	6.58362	4.03827	0.00118439	0.0263819	-1.01805
Uchl5	0.276205	4.93517	4.03823	0.00118449	0.0263819	-0.89781
Psme3	0.178172	6.73099	4.0374	0.00118644	0.0263819	-1.02253
Ndfip1	0.18562	8.89776	4.03714	0.00118705	0.0263819	-0.995587
Srrm4	-0.427454	4.1275	-4.03409	0.00119421	0.0265051	-0.805261
Pdcd10	0.192889	5.90713	4.02771	0.00120937	0.0267482	-1.00902
Gcsh	0.191365	5.87351	4.02741	0.00121008	0.0267482	-1.00737
Grsf1	0.162138	7.3075	4.02741	0.00121009	0.0267482	-1.04339
Cplx2	0.418193	6.75152	4.05756	0.00121234	0.0267616	-1.02738
Nup188	-0.239362	4.88068	-4.02477	0.0012164	0.0268151	-0.917202
Kdm6b	-0.31735	5.83268	-4.02305	0.00122054	0.02687	-1.01214
Nans	0.204599	5.54359	4.02204	0.00122299	0.0268877	-0.992187
Esd	0.241545	5.64314	4.01851	0.00123154	0.0270392	-1.00731
Ipo11	0.196297	5.55075	4.0171	0.00123499	0.0270785	-1.00244
Itpr3	-0.417092	3.3604	-4.01392	0.00124278	0.0272128	-0.767685
Mpzl1	-0.242052	5.41987	-4.01304	0.00124493	0.0272232	-0.997887
Mas1l	-0.488565	1.67092	-4.00984	0.00125285	0.0273597	-0.756317
Adh5	0.161544	5.76268	4.00693	0.00126008	0.0274342	-1.03948
Zfp398	-0.247472	4.25884	-4.00649	0.00126117	0.0274342	-0.874802
Fam193a	-0.1711	5.23257	-4.00643	0.00126131	0.0274342	-0.992445
Apex1	0.2378	5.51987	4.00205	0.00127228	0.027636	-1.02873
Plekhb2	0.18135	9.17132	3.99883	0.00128043	0.0277761	-1.06265
Dip2b	-0.267857	6.85393	-3.99794	0.00128269	0.0277789	-1.10072
Prdx1	0.217305	7.49251	3.99743	0.00128396	0.0277789	-1.10021
Rnf7	0.247851	3.80066	3.99589	0.00128788	0.0278267	-0.841665
Mlx	0.191073	5.43361	3.99519	0.00128967	0.0278287	-1.03433
Lamc1	-0.355359	6.24005	-3.99875	0.00129332	0.0278429	-1.08974
Dpy19l3	-0.295743	7.34446	-3.99359	0.00129375	0.0278429	-1.10893
Trni	0.815902	3.34049	4.04833	0.00129811	0.0278999	-0.783331
Clstn2	-0.315508	7.79992	-3.98778	0.00130872	0.0280911	-1.11516
Afap1	-0.223222	5.13112	-3.98635	0.00131243	0.0281336	-1.02017
Rabl3	0.369084	3.51801	3.98427	0.00131784	0.0282124	-0.835331
Rala	0.188008	6.68013	3.98065	0.00132733	0.0283533	-1.13254
Fabp5	0.251626	6.33728	3.98005	0.00132889	0.0283533	-1.12386
Ppif	0.214162	4.66214	3.97977	0.00132963	0.0283533	-0.977277
Slc52a3	-0.582596	1.49277	-3.97647	0.00133835	0.028502	-0.818523
Ndst1	-0.228392	7.35748	-3.97219	0.00134974	0.0287071	-1.15076
Ikbke	-0.453024	2.89545	-3.97078	0.00135352	0.0287499	-0.821396
Plekhm1	-0.174747	5.00381	-3.96973	0.00135632	0.028772	-1.03824
Unc80	-0.29071	8.18314	-3.96897	0.00135836	0.0287779	-1.14546
Ngf	0.573998	0.486807	3.96826	0.00136028	0.0287811	-0.876888
Tmem183a	0.166521	6.35585	3.96723	0.00136305	0.0288023	-1.14989
P2rx7	-0.386174	4.08189	-3.9643	0.001371	0.0289328	-0.932224
Adam19	-0.304855	4.78211	-3.96167	0.00137815	0.0290463	-1.0262
Txn2	0.188344	6.26625	3.95611	0.00139341	0.02933	-1.16792
Rsf1	-0.174911	6.21378	-3.95507	0.00139628	0.0293524	-1.1675
Zfp618	-0.33122	3.98644	-3.95334	0.00140108	0.0294155	-0.941986
Igsf10	-0.554256	3.9275	-3.9679	0.00140608	0.0294825	-0.92933
Pabpn1	-0.228192	7.0125	-3.9503	0.00140954	0.0295065	-1.19485
LOC690035	-0.276205	3.9909	-3.94965	0.00141135	0.0295065	-0.949803
Tra2a	-0.330855	6.56864	-3.95217	0.00141265	0.0295065	-1.1893
Tma7	0.201866	5.97046	3.94708	0.00141857	0.0295923	-1.17016
LOC100363368	-0.564042	0.977758	-3.94397	0.00142733	0.0297369	-0.892414
Ptpn23	-0.170435	6.23098	-3.94108	0.00143554	0.0298698	-1.19564
Mxra7	-0.326902	5.57876	-3.93979	0.00143921	0.0299081	-1.15409
Zbtb37	-0.401634	1.84687	-3.93759	0.00144549	0.0299498	-0.876229
Gtf2f1	0.159981	6.22153	3.93749	0.0014458	0.0299498	-1.20241
Mrps36	0.195313	5.32416	3.93716	0.00144673	0.0299498	-1.13624
Idh3g	0.182017	7.30619	3.93619	0.00144953	0.0299697	-1.22168
Trnr	0.822808	3.13367	3.98086	0.00146364	0.0302233	-0.884422
Cacybp	0.209584	7.01884	3.92777	0.00147393	0.0303643	-1.23908
Slf2	-0.275408	5.67732	-3.92768	0.0014742	0.0303643	-1.18633
Ncl	0.153698	8.30311	3.92667	0.00147713	0.0303863	-1.2258
RGD1565641	0.260874	3.96308	3.92526	0.00148126	0.030409	-0.99292
Fam160b1	-0.231028	5.00395	-3.92446	0.00148364	0.030409	-1.1254
LOC103690947	0.504472	3.21907	3.92439	0.00148382	0.030409	-0.922457
LOC689268	-0.885499	3.6434	-4.01587	0.0014863	0.0304215	-0.916963
Ccnc	0.222382	5.77075	3.91634	0.00150771	0.030763	-1.21634
Pcdh17	-0.310912	6.92441	-3.91611	0.00150839	0.030763	-1.26109
Zfp592	-0.231184	5.35041	-3.91585	0.00150918	0.030763	-1.17989
Ndufa8	0.213878	7.4546	3.91465	0.00151277	0.030763	-1.26247
P2rx3	0.547728	1.46219	3.91431	0.00151379	0.030763	-0.925034
Slbp	0.236681	5.15271	3.91415	0.00151429	0.030763	-1.1626
Kidins220	-0.1934	8.97232	-3.90932	0.00152886	0.0309859	-1.24276
Slc38a5	-0.648967	1.86437	-3.90925	0.00152906	0.0309859	-0.92485
Zbtb44	-0.23953	5.11693	-3.90718	0.00153536	0.0310421	-1.17174
Tmem5	0.226462	4.7448	3.90709	0.00153564	0.0310421	-1.12748
LOC102547107	-0.569456	0.661282	-3.90543	0.00154072	0.0311061	-0.970672
Ccnjl	-0.395582	2.80565	-3.90324	0.00154742	0.031175	-0.940215
Tjp1	-0.221178	7.73389	-3.90307	0.00154795	0.031175	-1.28178
LOC108352957	-0.312749	4.0973	-3.90166	0.00155227	0.0312234	-1.05342
Clk2	-0.237304	4.5811	-3.89887	0.00156089	0.0313582	-1.12179
Cox7c	0.232348	6.89925	3.8978	0.00156422	0.0313863	-1.29719
Tsg101	0.182863	6.7291	3.89511	0.00157261	0.0315159	-1.30066
Bin2	0.408611	3.94392	3.89426	0.00157526	0.0315303	-1.04835
Prkg2	0.415164	3.19231	3.88993	0.00158884	0.0316862	-0.984141
LOC102551251	-0.706322	3.19976	-3.91469	0.00158889	0.0316862	-0.973659
LOC102550527	-0.691081	3.04155	-3.90705	0.00159189	0.0316862	-0.96896
Pithd1	0.233541	6.87931	3.88881	0.00159238	0.0316862	-1.31464
C2cd3	-0.301557	5.16896	-3.88869	0.00159276	0.0316862	-1.21296
Pin1	0.219682	6.42357	3.88654	0.00159958	0.0317468	-1.30988
Acap3	-0.205789	5.66742	-3.8865	0.0015997	0.0317468	-1.26617
Capza2	0.155719	7.52621	3.88339	0.00160962	0.0319049	-1.32293
Slc17a7	1.46549	5.83861	4.15135	0.00161164	0.0319061	-1.1327
Setx	-0.195788	6.59341	-3.88167	0.00161513	0.0319365	-1.32419
Kcnb2	-0.521588	3.11717	-3.87928	0.0016228	0.0320485	-0.998492
Ndufs1	0.16022	8.19429	3.87869	0.00162473	0.0320485	-1.32193
Bpifb4	0.705321	1.1014	3.87702	0.00163011	0.0320858	-0.999615
Lcor_1	-0.336684	3.56167	-3.87688	0.00163055	0.0320858	-1.0391
Ankrd11	-0.160492	7.57632	-3.87531	0.00163566	0.0321475	-1.33814
Plcb1	-0.262651	6.33486	-3.87389	0.00164029	0.0321998	-1.33101
Svop	0.283732	6.5888	3.86718	0.00166228	0.0325923	-1.35231
Cetn2	0.167344	5.9627	3.86365	0.00167397	0.0327822	-1.3327
Rpl13a	0.16662	8.3107	3.86277	0.00167692	0.0328005	-1.3506
Tnfsf8	-0.552674	0.316272	-3.86174	0.00168034	0.0328231	-1.05937
RGD1559904	-0.18124	5.48207	-3.8609	0.00168317	0.0328231	-1.29982
Anks1a	-0.224348	6.22291	-3.86052	0.00168445	0.0328231	-1.35255
Mdh1	0.181142	9.5966	3.85964	0.00168737	0.0328231	-1.32113
Atpif1	0.17975	6.81454	3.85942	0.00168814	0.0328231	-1.37173
Ptcd3	0.183866	5.84999	3.85502	0.00170294	0.0330251	-1.34193
Psma5	0.161221	5.90854	3.85468	0.00170411	0.0330251	-1.34669
Txndc9	0.178148	5.36845	3.85453	0.0017046	0.0330251	-1.30137
Tomm20	0.173266	6.8566	3.85098	0.0017167	0.033128	-1.38866
Adamts9	-0.403451	3.56544	-3.85062	0.00171789	0.033128	-1.08819
Tmem184c	0.170885	6.0623	3.85055	0.00171816	0.033128	-1.36419
LOC102553881	-0.665402	4.54483	-3.92641	0.00171848	0.033128	-1.16745
Cntnap2	-0.260961	7.27677	-3.84999	0.00172007	0.033128	-1.39049
Ahdc1	-0.246675	6.10441	-3.84679	0.00173104	0.0333	-1.37334
Srebf2	-0.191677	7.74745	-3.84419	0.00174001	0.0334222	-1.39688
Sez6	-0.248524	7.16279	-3.84376	0.00174149	0.0334222	-1.40328
Zbed6	-0.387462	6.08254	-3.86159	0.00174947	0.0335361	-1.37078
Adk	0.209418	6.34141	3.83925	0.00175717	0.0335724	-1.39947
Tpd52	0.219626	7.13893	3.83845	0.00176	0.0335724	-1.4139
Pknox2	-0.254605	4.92741	-3.83831	0.00176049	0.0335724	-1.2827
Vbp1	0.189434	5.99218	3.83818	0.00176093	0.0335724	-1.38419
Arl6ip4	0.239743	5.52383	3.8376	0.00176296	0.0335724	-1.34905
Ski	-0.215612	6.48743	-3.83738	0.00176372	0.0335724	-1.40797
RGD1560212	0.205109	5.90241	3.83361	0.00177702	0.0337626	-1.3873
Trim47	-0.370851	2.87763	-3.83337	0.00177785	0.0337626	-1.06955
Pnpla7	-0.220153	4.71559	-3.8323	0.00178165	0.0337666	-1.26759
Fopnl	0.258636	5.1382	3.8319	0.00178305	0.0337666	-1.32036
Clec2d	1.29825	0.653722	3.89294	0.00178427	0.0337666	-1.07965
Grin2d	-0.353611	5.08432	-3.82751	0.00179871	0.0339649	-1.32151
Zcchc8	-0.265103	4.70775	-3.82745	0.00179891	0.0339649	-1.27558
Aloxe3	-0.442391	2.97118	-3.82515	0.00180716	0.0340732	-1.08911
Zfp385c	-0.710421	0.556081	-3.82469	0.00180883	0.0340732	-1.10853
Zc3h11a	-0.254066	6.36939	-3.8221	0.00181815	0.0341881	-1.43371
Zfp335	-0.215769	5.64857	-3.82184	0.00181912	0.0341881	-1.39066
Hivep2	-0.22748	6.27928	-3.82023	0.00182494	0.0342561	-1.4339
LOC690155	0.534883	3.45573	3.82177	0.00182694	0.0342561	-1.13393
Cenpk	0.374965	1.59754	3.81554	0.00184206	0.0344846	-1.09089
Prdx2	0.189629	8.23827	3.81519	0.00184335	0.0344846	-1.44527
Ly75	-0.43197	2.94244	-3.81271	0.00185245	0.0345474	-1.11025
Spata2L	-0.37687	3.00065	-3.81261	0.00185283	0.0345474	-1.11371
Rgs12	-0.227719	5.25535	-3.81255	0.00185306	0.0345474	-1.37073
Hsd17b10	0.168021	5.30004	3.81192	0.00185539	0.0345513	-1.37726
Ralgds	-0.176659	6.40421	-3.81125	0.00185784	0.0345575	-1.4566
Phf21b	-0.366456	2.81908	-3.81014	0.00186195	0.0345592	-1.10905
Enc1	-0.38792	5.89673	-3.82969	0.00186217	0.0345592	-1.42065
Urb2	-0.270883	3.24666	-3.80373	0.00188588	0.0349075	-1.14701
Calm1	0.198733	10.1304	3.80373	0.00188588	0.0349075	-1.41258
Bckdha	0.179396	6.06564	3.80278	0.00188944	0.0349075	-1.45778
RGD1560470	-0.279654	6.10106	-3.80276	0.00188949	0.0349075	-1.45909
Dld	0.168375	7.48078	3.80099	0.00189619	0.0349694	-1.48485
Bahcc1	-0.273487	4.88425	-3.80074	0.00189713	0.0349694	-1.34984
Fryl	-0.262671	7.11654	-3.79986	0.00190044	0.0349908	-1.48939
Mrpl16	0.224769	4.40535	3.79746	0.00190957	0.0351192	-1.29337
Purb	-0.230204	6.06082	-3.79384	0.00192337	0.0353332	-1.47457
Dpm1	0.16143	4.97789	3.7913	0.00193313	0.0354547	-1.38075
Tmem65	0.219045	6.3643	3.79099	0.00193433	0.0354547	-1.49486
Snrpe	0.207294	4.36182	3.7897	0.0019393	0.0355059	-1.30241
Mlxip	-0.303886	4.73078	-3.78788	0.00194632	0.0355945	-1.35463
Sec62	0.132591	8.19332	3.78658	0.00195136	0.0356468	-1.50227
Dnaja2	0.16866	7.3161	3.78524	0.00195661	0.0356828	-1.51729
Chd6	-0.198622	7.13095	-3.78495	0.00195771	0.0356828	-1.51874
Als2cl	-0.456474	3.97986	-3.78257	0.00196701	0.0358022	-1.26329
Dis3l	0.201066	4.82638	3.78172	0.00197034	0.0358022	-1.38006
Psma1	0.146873	6.31718	3.7816	0.00197084	0.0358022	-1.51154
Sh3rf3	-0.354068	3.23858	-3.78102	0.0019731	0.0358033	-1.18811
Dvl3	-0.189567	6.48437	-3.77969	0.00197832	0.0358581	-1.52099
Maea	0.159053	6.61582	3.77868	0.0019823	0.0358905	-1.52667
Ablim3	-0.354359	4.93705	-3.77506	0.00199666	0.0359815	-1.40537
Degs2	-0.543834	1.45277	-3.77478	0.0019978	0.0359815	-1.1635
LOC103692951	-0.527469	1.94062	-3.77422	0.00200002	0.0359815	-1.15874
LOC103692946	0.671347	2.75439	3.78081	0.00200247	0.0359815	-1.16935
Cdan1	-0.218522	4.91109	-3.77355	0.00200268	0.0359815	-1.40625
Sec16a	-0.216998	6.86677	-3.77336	0.00200346	0.0359815	-1.54069
Piezo1	-0.423041	3.54703	-3.77215	0.00200827	0.0359815	-1.23275
Rcor2	-0.39867	-0.052834	-3.77148	0.00201094	0.0359815	-1.22399
Pde4dip	-0.16641	8.05778	-3.77092	0.00201319	0.0359815	-1.53551
Nid1	-0.411036	6.55874	-3.80449	0.00201508	0.0359815	-1.52107
Eng	-0.595183	4.61144	-3.82811	0.00201528	0.0359815	-1.33908
Frmd4a	-0.24215	4.97817	-3.77035	0.00201547	0.0359815	-1.42055
Psma3	0.171814	6.87115	3.77022	0.00201601	0.0359815	-1.54707
Stip1	0.158989	8.15907	3.76859	0.00202258	0.036045	-1.5382
Rps6ka3	-0.19172	5.63831	-3.76782	0.00202569	0.036045	-1.49532
Sdcbp	0.15295	8.45095	3.76769	0.00202619	0.036045	-1.53344
Cdk5	0.18424	6.02906	3.76561	0.00203463	0.0361394	-1.52833
Psmd12	0.175125	6.77244	3.76508	0.00203678	0.0361394	-1.55612
Akap13	-0.274475	5.84869	-3.76474	0.00203815	0.0361394	-1.51754
Mettl23	0.404832	2.34452	3.76177	0.00205024	0.036295	-1.18232
Fanci	-0.448251	1.39662	-3.7615	0.00205137	0.036295	-1.18724
Map1lc3a	0.216181	7.23572	3.76066	0.0020548	0.0363163	-1.56598
Usp34	-0.217717	7.86979	-3.75932	0.00206028	0.0363738	-1.56136
Abcf3	0.147772	6.80335	3.75791	0.0020661	0.036437	-1.57063
Rapgef2	-0.203261	6.46125	-3.75656	0.00207166	0.0364957	-1.56558
Gyg1	0.212022	5.68591	3.75512	0.00207758	0.0365605	-1.5243
Ddx17	-0.174182	7.37871	-3.7534	0.00208472	0.0366012	-1.57912
Kcnj6	-0.36013	6.31362	-3.76833	0.00208809	0.0366012	-1.5582
Cisd1	0.172188	6.0403	3.75232	0.00208921	0.0366012	-1.55503
Scrib	-0.222978	6.47495	-3.75223	0.00208958	0.0366012	-1.57439
Irf6	0.483294	2.44816	3.75168	0.00209189	0.0366012	-1.20214
LOC103690074	-0.365328	2.89141	-3.75133	0.00209335	0.0366012	-1.21933
Phf12	-0.207279	5.37293	-3.75059	0.00209646	0.0366071	-1.50376
Anp32a_1	0.196992	4.70378	3.75018	0.00209818	0.0366071	-1.42489
Fchsd2	-0.178795	5.93499	-3.74784	0.00210795	0.0367383	-1.55705
Cox8a	0.173847	7.594	3.74493	0.00212023	0.036855	-1.59342
Vps50	0.228788	5.15295	3.74452	0.00212196	0.036855	-1.49189
Arhgap33	-0.381535	4.98423	-3.74741	0.00212249	0.036855	-1.46872
Akr1b10	-0.491025	2.44883	-3.74411	0.00212369	0.036855	-1.21567
Fabp3	0.252951	4.52319	3.74348	0.00212636	0.0368623	-1.41295
Sdf2	0.244451	5.94624	3.74133	0.00213551	0.0369814	-1.57046
Stx12	0.165242	7.48259	3.73974	0.00214227	0.0370592	-1.6049
Med20	0.221943	4.92393	3.73774	0.00215083	0.0371664	-1.47746
Stx8	0.224356	4.45149	3.73674	0.00215512	0.0371664	-1.41615
Vps13a	-0.186309	6.27987	-3.7357	0.00215962	0.0371664	-1.59962
Helz	-0.283808	5.58352	-3.73548	0.00216057	0.0371664	-1.55305
Mob2	0.211294	4.76103	3.73494	0.00216291	0.0371664	-1.46183
Bloc1s2	0.247109	5.00544	3.73433	0.00216553	0.0371664	-1.49408
Park7	0.164542	7.51466	3.73379	0.00216786	0.0371664	-1.61621
Kmt5b	-0.167442	5.84236	-3.73368	0.00216832	0.0371664	-1.57837
LOC361985	0.196155	6.12708	3.73284	0.00217198	0.0371664	-1.59798
Nhlrc2	-0.218913	5.24005	-3.73213	0.00217506	0.0371664	-1.5255
Lnx2	-0.392165	3.47811	-3.73164	0.00217716	0.0371664	-1.30143
Eif3g	0.167588	6.27849	3.73109	0.00217958	0.0371664	-1.6088
Phospho2	0.234167	4.83774	3.73096	0.00218013	0.0371664	-1.4795
Lias	0.196747	5.04851	3.73091	0.00218036	0.0371664	-1.5062
Znf740	-0.141156	6.23977	-3.72979	0.00218522	0.0371895	-1.60956
Ptchd4	-0.357711	2.10388	-3.72905	0.00218846	0.0371895	-1.23792
Clns1a	0.185592	5.81021	3.72902	0.00218856	0.0371895	-1.58526
LOC680491	0.371299	1.86549	3.72774	0.00219419	0.0372464	-1.24011
Skp2	-0.357696	2.52855	-3.72362	0.00221228	0.0374854	-1.25437
Dnaja4	0.257489	6.75971	3.723	0.00221502	0.0374854	-1.63822
Cdh4	-0.354714	4.795	-3.72297	0.00221516	0.0374854	-1.48794
Prdm10	-0.256286	3.69922	-3.72187	0.00222	0.0375093	-1.34476
Cntn4	-0.280141	5.6759	-3.72161	0.00222118	0.0375093	-1.58818
Plscr2	-0.579477	1.06446	-3.72049	0.00222616	0.0375371	-1.26441
Macrod2	0.294227	4.59286	3.7202	0.00222742	0.0375371	-1.46706
Atp6v1c1	0.199199	7.7208	3.71898	0.00223284	0.0375896	-1.64265
Flrt1	-0.22513	5.55948	-3.71691	0.00224209	0.0377065	-1.58746
Gemin7	0.350527	2.9678	3.71467	0.00225213	0.0378247	-1.29072
Zc3h4	-0.170785	6.13706	-3.71368	0.00225658	0.0378247	-1.63595
Nup160	-0.257232	4.08275	-3.71331	0.00225825	0.0378247	-1.40994
Cacna1e	-0.386994	7.14177	-3.73959	0.0022584	0.0378247	-1.64371
Zfp609	-0.213328	6.19638	-3.71226	0.00226297	0.037825	-1.64157
Rbm11	0.511998	3.37693	3.71225	0.00226305	0.037825	-1.32727
Cnbp	0.143485	7.93298	3.71088	0.00226922	0.0378893	-1.65539
Mtch2	0.152423	6.55928	3.70996	0.00227339	0.0378941	-1.66004
RGD1359158	0.270806	3.64623	3.7095	0.00227548	0.0378941	-1.36195
Ntan1	0.197596	5.70835	3.70911	0.00227728	0.0378941	-1.61608
Ncoa2	-0.180938	6.36899	-3.70855	0.00227981	0.0378941	-1.65649
Ssr4	0.251486	5.16165	3.70741	0.00228499	0.0378941	-1.56486
Atxn2l	-0.213992	7.17118	-3.70741	0.00228501	0.0378941	-1.67065
LOC108352908	0.809674	0.265763	3.70724	0.00228577	0.0378941	-1.31375
Ptprs	-0.215975	8.54516	-3.70396	0.00230079	0.0380918	-1.65583
Dmd	-0.160872	6.52714	-3.70361	0.00230237	0.0380918	-1.67149
Ndufb7	0.182878	6.05761	3.70256	0.00230723	0.0381336	-1.65343
Iscu	0.191659	6.90686	3.70083	0.00231519	0.038222	-1.68342
Dock4	-0.269795	6.22627	-3.70038	0.00231727	0.038222	-1.66599
Rpl17	0.319621	6.85165	3.70266	0.00232026	0.0382327	-1.68307
Mea1	0.16626	6.27516	3.69881	0.00232457	0.0382651	-1.6719
Tifa	0.315728	3.06849	3.69697	0.00233309	0.0383283	-1.33001
Ampd2	-0.177288	6.95007	-3.69655	0.00233508	0.0383283	-1.69199
Ube2d3	0.160276	7.84556	3.69646	0.00233546	0.0383283	-1.68502
Hcfc1r1	0.194535	6.45139	3.69288	0.00235224	0.0385061	-1.69024
Tex43	-0.425299	-0.0691454	-3.69253	0.00235389	0.0385061	-1.35143
Prdx3	0.177345	6.23473	3.69175	0.00235755	0.0385061	-1.6839
Sel1l3	-0.357182	6.31041	-3.7071	0.00236017	0.0385061	-1.67809
Pcmt1	0.225558	7.72098	3.69099	0.00236113	0.0385061	-1.69752
Zhx3	-0.179792	7.0571	-3.69094	0.00236134	0.0385061	-1.70321
Rpl27a	0.179175	7.46157	3.69063	0.00236282	0.0385061	-1.70143
Trmt6	0.23745	3.91991	3.68969	0.00236725	0.0385232	-1.43347
Plvap	0.353665	4.07624	3.68941	0.00236859	0.0385232	-1.45424
Ndufa9	0.186866	6.75366	3.68747	0.00237775	0.0386152	-1.70799
Cycs	0.196182	7.20706	3.68722	0.00237898	0.0386152	-1.71021
Slc20a2	-0.285348	7.48207	-3.6849	0.00239002	0.0387559	-1.71232
Csde1	0.15119	7.78067	3.68318	0.0023982	0.0388499	-1.71202
Astn1	-0.262476	7.86727	-3.68252	0.00240138	0.0388628	-1.7119
Dock7	-0.187299	6.56553	-3.68125	0.00240749	0.0389231	-1.71628
Nktr	-0.303519	6.69454	-3.67735	0.00242906	0.039172	-1.72707
Spry3	-0.323766	2.75103	-3.67638	0.00243103	0.039172	-1.34824
Pfdn6	0.17796	5.70791	3.67599	0.00243288	0.039172	-1.68081
Zic4	-0.346836	4.21715	-3.67558	0.00243491	0.039172	-1.4996
Upf3a	0.190052	5.29049	3.67543	0.0024356	0.039172	-1.64175
Focad	-0.166101	5.91314	-3.67509	0.00243729	0.039172	-1.69796
Cdh2	-0.179988	7.6106	-3.67369	0.00244408	0.0392025	-1.73287
Epha8	-0.36296	3.18153	-3.67305	0.00244721	0.0392025	-1.38268
Acad9	0.165847	5.8249	3.67301	0.00244743	0.0392025	-1.69593
Ivd	0.134886	6.5579	3.67253	0.00244978	0.0392025	-1.73343
LOC108351758	-0.550812	0.615398	-3.67168	0.00245391	0.0392025	-1.35923
Rps23	0.170211	7.17255	3.67149	0.00245485	0.0392025	-1.74123
Oaz1	0.182115	8.1736	3.67091	0.00245771	0.0392025	-1.72929
Gps1	0.177808	6.92315	3.67073	0.00245858	0.0392025	-1.74261
Mrpl35	0.217604	4.81481	3.67028	0.00246082	0.0392025	-1.59398
Vdac2	0.168434	8.11363	3.66956	0.00246434	0.0392202	-1.73312
Dgkd	-0.169064	6.53275	-3.6686	0.00246909	0.0392482	-1.74027
Tnfrsf19	-0.289847	4.1135	-3.66823	0.00247091	0.0392482	-1.49975
Fbxl19	-0.21228	5.85479	-3.66733	0.00247535	0.0392805	-1.70881
Tpt1	0.206496	9.23772	3.66582	0.00248282	0.0393607	-1.71097
Trap1	0.174863	6.43106	3.66456	0.00248907	0.0394215	-1.74511
Tecpr2	-0.158737	6.15351	-3.66359	0.00249392	0.03946	-1.73493
Cox5b	0.204341	7.52009	3.6606	0.00250885	0.0396579	-1.75966
Mpc2	0.170016	6.61266	3.65701	0.00252691	0.0399046	-1.76513
Ndufab1	0.144887	6.589	3.65609	0.00253156	0.0399393	-1.76641
Safb	-0.146751	6.7	-3.65543	0.0025349	0.0399535	-1.76995
Arf1	0.139566	8.4229	3.65443	0.00253994	0.0399943	-1.75596
LOC103694513	-0.605082	2.12715	-3.64962	0.00256445	0.0403053	-1.37818
Zfp280c	-0.366931	3.86706	-3.64956	0.00256481	0.0403053	-1.50147
Pcna	0.17753	5.35023	3.64911	0.00256711	0.0403053	-1.69943
Pcdh15	-0.282642	3.13472	-3.647	0.00257795	0.0404366	-1.42702
Irx2	0.335775	4.11218	3.64595	0.00258333	0.040482	-1.54206
Thnsl2	0.232559	4.0039	3.64509	0.00258779	0.0404975	-1.5294
Rassf4	0.303372	5.57697	3.6448	0.00258928	0.0404975	-1.72964
Copg2	0.172569	7.10944	3.64346	0.00259625	0.0405676	-1.79641
Cox14	0.241245	5.19705	3.64247	0.00260135	0.0406085	-1.69524
Lcmt2	0.370149	2.16317	3.64186	0.00260457	0.0406198	-1.3922
Hs3st2	0.444134	3.23927	3.64128	0.00260759	0.0406282	-1.44635
Cep250	-0.240431	5.10899	-3.6395	0.00261688	0.0407339	-1.69036
Ubxn1	0.171845	6.34006	3.63808	0.0026243	0.0408104	-1.79364
Churc1	0.375185	3.52741	3.63327	0.00264966	0.0411276	-1.4908
LOC103692397	-0.537627	1.45672	-3.63284	0.00265191	0.0411276	-1.40709
Hcn1	-0.294593	5.34689	-3.63278	0.00265225	0.0411276	-1.72996
Erbb4	-0.279527	4.93846	-3.63051	0.00266432	0.0412755	-1.68634
Atp5d	0.168989	7.52814	3.62758	0.00267994	0.0414312	-1.82433
Fstl4	-0.419271	2.96613	-3.62757	0.00268001	0.0414312	-1.44974
Snx6	0.140669	5.87701	3.6272	0.00268199	0.0414312	-1.78932
Smpd3	-0.220974	5.29574	-3.6263	0.00268682	0.0414665	-1.73757
H2afz	0.178258	5.79107	3.62462	0.00269583	0.0415662	-1.78789
Cyp2j3	-0.292849	5.12445	-3.62335	0.00270268	0.0416287	-1.72316
Ndufs5	0.167817	6.28526	3.62293	0.00270499	0.0416287	-1.821
Sik2	-0.187785	6.23553	-3.62139	0.00271331	0.0417175	-1.82154
Jph4	-0.242276	7.00005	-3.6193	0.00272469	0.0418372	-1.84354
Tstd3	0.279798	5.49548	3.61901	0.00272623	0.0418372	-1.77239
Ccnt2	-0.298849	6.30478	-3.61833	0.00272999	0.0418555	-1.83015
Oat	0.164358	6.80532	3.61684	0.0027381	0.0419406	-1.84729
Hrasls	0.461715	3.38738	3.61595	0.00274295	0.0419754	-1.50761
Tpcn1	-0.209017	7.21465	-3.61321	0.00275806	0.042167	-1.85522
Chchd3	0.168977	6.23168	3.61154	0.00276726	0.0422682	-1.8409
Thumpd3	0.196812	5.43433	3.61062	0.00277234	0.0422814	-1.78306
Cir1	0.178431	5.15143	3.61045	0.00277332	0.0422814	-1.75252
Chst3	-0.399845	3.99264	-3.60946	0.00277878	0.0423252	-1.59403
Vimp	0.196585	5.24428	3.60866	0.00278327	0.0423394	-1.76663
Ppp1r2	0.165529	7.20219	3.60836	0.0027849	0.0423394	-1.86494
Zmym3	-0.227127	6.99791	-3.60524	0.00280235	0.0425149	-1.87115
Sbds	0.180725	6.49844	3.60444	0.00280684	0.0425149	-1.86518
Rtcd1	0.172358	5.96444	3.60435	0.00280736	0.0425149	-1.83999
Edc4	-0.135083	6.04739	-3.60324	0.00281358	0.0425149	-1.84722
Mmrn2	-0.696012	2.95441	-3.62477	0.00281501	0.0425149	-1.48354
Khk	0.310006	3.26285	3.60294	0.00281524	0.0425149	-1.51985
Cap1	0.130246	7.84227	3.60283	0.00281589	0.0425149	-1.86865
LOC103694121	0.463183	1.06605	3.60258	0.0028173	0.0425149	-1.46395
Poldip2	0.155845	6.86309	3.60128	0.00282464	0.0425536	-1.87838
Erich3	-0.269892	6.00008	-3.6012	0.00282508	0.0425536	-1.84769
Mycn	-0.391916	1.54969	-3.59937	0.00283545	0.0426704	-1.46419
Ttc9c	0.146359	6.06039	3.59803	0.00284303	0.0427167	-1.85833
Zfp952	0.295458	3.4918	3.5979	0.00284377	0.0427167	-1.55322
Itgb3bp	0.271324	3.0384	3.59725	0.00284747	0.042733	-1.51092
Ndufb5	0.176941	6.63471	3.59601	0.00285453	0.0427996	-1.88524
Sugt1	0.192958	5.92478	3.59489	0.00286098	0.0428569	-1.85575
Bcl2l15	-0.644486	0.781704	-3.59406	0.00286571	0.0428883	-1.48422
Pigy	0.179687	5.42236	3.59308	0.00287134	0.0429109	-1.81612
Abhd1	-0.241309	4.36765	-3.59262	0.00287395	0.0429109	-1.68061
Lcor	-0.266601	4.17461	-3.59242	0.00287511	0.0429109	-1.65306
Eef1b2	0.169313	6.93627	3.59064	0.00288535	0.0430245	-1.89977
Sdha	0.171833	8.77881	3.58963	0.0028912	0.0430723	-1.87346
Tenm1_1	-0.619874	3.4879	-3.61145	0.00290047	0.0431402	-1.55764
Scarb2	-0.156098	7.27705	-3.58763	0.00290279	0.0431402	-1.90507
Ifnar1	-0.129793	6.58227	-3.58748	0.00290369	0.0431402	-1.90069
Adamts15	-0.625348	3.10444	-3.60091	0.0029089	0.0431782	-1.52825
Plxna3	-0.270147	5.72013	-3.5844	0.0029216	0.0433274	-1.86004
LOC108349703	-0.351645	1.86797	-3.58393	0.00292436	0.0433289	-1.49125
Rcc2	0.132781	6.4484	3.58347	0.00292708	0.0433298	-1.90474
Lgals9	-0.477563	3.59595	-3.58309	0.00292986	0.0433316	-1.592
Sobp	-0.160655	6.10484	-3.58109	0.00294101	0.0434572	-1.89385
Nploc4	0.17618	6.17751	3.57959	0.00294986	0.0434797	-1.90073
Sirt3	0.209326	5.61037	3.57921	0.00295212	0.0434797	-1.86121
Ifrd2	-0.287765	2.70949	-3.5789	0.00295396	0.0434797	-1.52271
Ncln	-0.203536	6.19908	-3.57853	0.00295614	0.0434797	-1.90367
Ufd1l	0.172316	6.21071	3.57831	0.00295741	0.0434797	-1.90495
Gpr4	-0.604646	2.30559	-3.57781	0.00296041	0.0434797	-1.50885
Pex14	0.174149	5.77016	3.57767	0.0029612	0.0434797	-1.87798
Prkdc	-0.230486	5.49567	-3.57678	0.00296648	0.0434896	-1.85475
Ing4	-0.151463	5.18411	-3.57632	0.0029692	0.0434896	-1.82254
Rpl32	0.158416	6.91271	3.57621	0.00296986	0.0434896	-1.92795
Atp5e	0.204161	6.65176	3.57407	0.00298261	0.0436371	-1.92855
Scap	-0.14095	6.93409	-3.57352	0.0029859	0.0436461	-1.9333
Cyp2d3	-0.6362	0.19114	-3.5726	0.00299139	0.0436871	-1.53693
Pgam1	0.186462	9.20034	3.57137	0.00299876	0.0437481	-1.89679
Snrnp48	-0.320628	4.38857	-3.57101	0.00300093	0.0437481	-1.72447
Ufm1	0.298663	5.09193	3.56904	0.00301281	0.0438061	-1.8251
Erc1	-0.245768	6.03655	-3.56895	0.00301332	0.0438061	-1.91322
Sorcs1	-0.190958	6.2596	-3.56872	0.00301469	0.0438061	-1.9258
Eif2s3	0.16132	6.89362	3.56827	0.00301745	0.0438061	-1.94337
Pknox1	-0.173009	4.63734	-3.56812	0.00301833	0.0438061	-1.76685
Camk2a	-0.310884	6.14631	-3.57005	0.0030228	0.043832	-1.92061
Prr14l	-0.21213	5.96565	-3.56626	0.00302958	0.0438869	-1.91413
Lrrc8d	-0.179013	6.0654	-3.56546	0.00303446	0.0438869	-1.92207
Fkbp8	0.182	8.13468	3.56542	0.00303466	0.0438869	-1.93677
Tbx4	0.497655	0.294197	3.56317	0.0030484	0.0440465	-1.549
Naa25	-0.147257	5.53038	-3.56139	0.00305922	0.0441272	-1.88857
Nol6	-0.16226	6.63546	-3.56137	0.00305939	0.0441272	-1.95306
Rnf146	0.156643	5.45413	3.5603	0.00306593	0.0441414	-1.88328
Taf1c	-0.323741	3.35557	-3.56016	0.00306678	0.0441414	-1.60843
Pes1	0.13842	5.72786	3.55968	0.00306972	0.0441414	-1.90979
Plxna4	-0.3767	6.773	-3.58569	0.0030712	0.0441414	-1.94263
Srgap3	-0.210632	7.50364	-3.55855	0.00307666	0.0441809	-1.9599
LOC108349107	0.45158	1.46671	3.55733	0.00308418	0.0442499	-1.53711
Col7a1	-0.749678	1.46591	-3.55798	0.0030966	0.0443891	-1.53967
Mllt1	-0.180248	5.61174	-3.55478	0.00309997	0.0443985	-1.90893
Tmem186	0.201592	4.58399	3.55416	0.00310382	0.0444039	-1.78627
Rexo1	-0.15279	5.59215	-3.55384	0.0031058	0.0444039	-1.90907
Efna5	-0.269152	5.40938	-3.55216	0.00311624	0.0444798	-1.89371
Dll4	-0.688779	1.29057	-3.552	0.00311724	0.0444798	-1.54738
Med14	-0.178098	5.89182	-3.55168	0.00311929	0.0444798	-1.93778
Faap24	0.326765	1.45188	3.54996	0.00313001	0.0445938	-1.54987
Cacna2d2	-0.312499	7.25477	-3.55375	0.00313786	0.0446293	-1.97819
Kcns2	0.640592	1.98613	3.54822	0.00314092	0.0446293	-1.55507
Dlc1	-0.195769	5.80074	-3.54807	0.00314186	0.0446293	-1.93792
Ptp4a2	0.177482	7.02931	3.54732	0.00314662	0.0446293	-1.98497
Rnasek	0.174144	6.94253	3.54698	0.00314874	0.0446293	-1.9854
LOC102549542	-0.334164	3.21675	-3.5468	0.00314985	0.0446293	-1.61921
Ogt	-0.217256	7.8454	-3.54593	0.00315539	0.0446293	-1.98004
Dnajc8	0.177237	6.38989	3.54532	0.00315921	0.0446293	-1.97734
Lmtk3	-0.265178	6.89117	-3.54527	0.00315953	0.0446293	-1.98802
Mtrf1	0.221794	4.14874	3.54522	0.00315986	0.0446293	-1.74003
Sox18	-0.578975	2.05783	-3.54422	0.00316617	0.0446534	-1.56319
Cyp2j4	-0.460691	1.53356	-3.54408	0.00316705	0.0446534	-1.55983
Gabarapl2	0.168498	7.27412	3.54292	0.00317441	0.0446862	-1.99278
RGD1564247	-0.633234	1.78951	-3.54285	0.00317485	0.0446862	-1.56256
Ipcef1	-0.333277	4.08016	-3.54042	0.00319038	0.0448661	-1.73823
Ksr2	-0.29545	5.08376	-3.53962	0.00319549	0.0448993	-1.88083
Zbtb40	-0.31119	4.94083	-3.539	0.00319943	0.0449159	-1.86368
Ccdc88a	-0.203206	7.27202	-3.53801	0.0032058	0.0449666	-2.00235
Dpm3	0.469612	1.5105	3.53338	0.00323561	0.0453458	-1.57835
Ss18l2	0.205907	5.04677	3.53251	0.00324127	0.0453861	-1.89101
Lamb3	0.913336	2.47794	3.57991	0.00325194	0.0454263	-1.57769
Pex16	0.203959	4.39378	3.53079	0.00325245	0.0454263	-1.80353
Dusp8	-0.236834	5.70393	-3.53046	0.00325458	0.0454263	-1.9642
Chd2	-0.171565	6.78483	-3.53008	0.00325705	0.0454263	-2.01697
Atp10a	-0.419301	3.70484	-3.52993	0.00325806	0.0454263	-1.70578
Rnf11l1	0.163161	6.65881	3.52546	0.00328736	0.0457956	-2.02408
Phf8	-0.232732	5.54169	-3.52477	0.00329191	0.0458145	-1.96059
Mrfap1	0.134617	8.53359	3.5244	0.00329433	0.0458145	-2.00778
Hnrnph3	-0.283708	3.13029	-3.5224	0.00330753	0.0458907	-1.65634
LOC102553088	-0.46155	2.28559	-3.5223	0.00330818	0.0458907	-1.60699
Son	-0.160524	8.47347	-3.52229	0.00330825	0.0458907	-2.01342
Psmb3	0.187307	6.06132	3.52181	0.00331146	0.0458937	-2.0074
Dync2h1	-0.309869	5.73363	-3.52233	0.00331409	0.0458937	-1.98332
Eif2s3y	0.162092	6.24412	3.5198	0.0033248	0.0460029	-2.02115
Cops3	0.168251	6.30746	3.51924	0.00332853	0.0460156	-2.02504
B3glct	-0.170519	4.77305	-3.51728	0.00334163	0.0461576	-1.88411
Ndufaf7	0.15933	5.43177	3.51662	0.00334601	0.0461599	-1.96612
Nsfl1c	0.143655	7.09699	3.51622	0.00334871	0.0461599	-2.04597
Mcoln1	0.184299	5.97794	3.51598	0.00335029	0.0461599	-2.01364
Zfp169	-0.283937	3.13956	-3.51169	0.00337919	0.0465187	-1.67693
L2hgdh	0.283201	3.77428	3.51103	0.00338367	0.0465333	-1.75182
Crh	0.469106	1.71368	3.5107	0.00338595	0.0465333	-1.6182
Shisa7	-0.370089	4.95808	-3.51439	0.00339571	0.0466281	-1.91991
Ppfia2	-0.249351	5.70835	-3.50784	0.0034054	0.0466705	-2.00867
Slc25a3	0.148104	8.77005	3.50783	0.00340541	0.0466705	-2.03374
Tmem55b	0.151108	5.95651	3.50715	0.0034101	0.0466705	-2.02963
Ndufv1	0.156571	7.55596	3.50713	0.00341024	0.0466705	-2.06011
Zbtb16	-0.367023	4.52445	-3.50549	0.00342144	0.0467846	-1.86961
Sppl3	-0.152262	6.16028	-3.50239	0.00344276	0.047032	-2.05088
Atxn1	-0.226047	4.34338	-3.50202	0.0034453	0.047032	-1.8509
Sh3pxd2b	-0.249483	4.73256	-3.50106	0.00345191	0.0470787	-1.90923
Pet100	0.190681	5.26155	3.50069	0.00345449	0.0470787	-1.97862
Eif4a1	0.142584	7.57625	3.49693	0.00348061	0.047395	-2.07985
Iws1	-0.181284	4.85713	-3.49624	0.00348537	0.0474202	-1.9363
Vps29	0.18278	5.82369	3.4953	0.00349193	0.047456	-2.0431
Rc3h1	-0.148016	6.37595	-3.49468	0.00349633	0.047456	-2.07592
Tbrg4	0.217566	4.93869	3.49428	0.00349907	0.047456	-1.95114
Tomm22	0.166163	5.89318	3.49418	0.00349983	0.047456	-2.05047
Commd3	0.208453	6.02147	3.49379	0.00350254	0.047456	-2.05967
Mrps33	0.178919	4.89662	3.49332	0.00350582	0.0474609	-1.94754
Shprh	-0.160972	5.59108	-3.49243	0.00351212	0.0474851	-2.02874
Tspoap1	-0.299495	6.82319	-3.49478	0.00351343	0.0474851	-2.08955
Atad1	0.129381	7.04077	3.48768	0.00354567	0.0478812	-2.10193
Gon4l	-0.158572	5.93482	-3.48666	0.00355288	0.0479389	-2.06796
Spint1	0.345888	3.09775	3.48397	0.00357212	0.0481587	-1.72419
Zbtb42	-0.33613	3.91408	-3.48299	0.00357914	0.0482134	-1.82357
Ints6l	-0.388195	4.24449	-3.48214	0.0035852	0.0482552	-1.87287
Cabp7	0.654917	5.71275	3.59252	0.00358831	0.0482573	-1.99029
Bag1	0.201132	5.91935	3.47906	0.00360743	0.0484745	-2.08178
Plagl1	-0.483284	4.37053	-3.50002	0.00361262	0.0484941	-1.88532
Wscd2	-0.310752	4.62854	-3.47803	0.00361484	0.0484941	-1.9382
Klhl41	-0.456097	0.232087	-3.47742	0.00361924	0.0485133	-1.69197
LOC100910788	0.184644	5.55401	3.47655	0.00362555	0.0485519	-2.05631
Reln	-0.529109	8.46777	-3.5575	0.00362855	0.0485519	-2.05393
Polr2e	0.14541	5.89843	3.47571	0.00363171	0.0485519	-2.08699
Ylpm1	-0.218024	6.80451	-3.47539	0.00363403	0.0485519	-2.12421
Tyk2	-0.246345	4.49552	-3.47434	0.00364164	0.0485921	-1.92637
LOC103694424	-0.463105	1.76296	-3.47413	0.00364317	0.0485921	-1.68235
Lyplal1	0.334728	3.65079	3.47375	0.00364597	0.0485921	-1.8053
Trim62	-0.225895	4.04637	-3.4731	0.0036507	0.0486154	-1.86224
Znrf3	-0.289102	3.13674	-3.46875	0.00368266	0.049001	-1.75588
Tmem59	0.181658	8.18526	3.46524	0.00370863	0.0493063	-2.13186
Dlgap3	-0.239354	6.2176	-3.46415	0.00371675	0.0493732	-2.12825
Grik5	-0.212999	6.50343	-3.46364	0.00372054	0.0493732	-2.14081
Gramd4	-0.1857	5.52522	-3.46335	0.00372274	0.0493732	-2.07899
Uqcr11	0.164959	6.92414	3.46215	0.00373167	0.0494119	-2.15153
Ttc17	-0.132032	5.80694	-3.46211	0.00373201	0.0494119	-2.10662
Nrxn3	-0.256493	7.51721	-3.46174	0.00373474	0.0494119	-2.14936
Pgap1	-0.420589	4.72419	-3.47615	0.00374328	0.0494481	-1.97512
Med31	0.283419	4.1252	3.46035	0.00374515	0.0494481	-1.89805
Micu2	0.146947	5.84483	3.46014	0.00374674	0.0494481	-2.11348
Neurod6	0.937884	2.8358	3.52731	0.00374961	0.0494481	-1.71466
Pogz	-0.216937	5.86689	-3.45926	0.00375333	0.0494573	-2.11637
Prelid1	0.146488	6.69484	3.457	0.00377033	0.0496387	-2.15884
Pfas	-0.165509	6.47882	-3.45663	0.00377318	0.0496387	-2.15395
Amacr	0.291629	4.45159	3.45611	0.00377707	0.0496497	-1.95488
Guk1	0.195572	6.8627	3.45505	0.00378514	0.0497158	-2.16486
Lama4	-0.374094	4.3625	-3.45438	0.00379022	0.0497424	-1.94372
Dlgap2	-0.32773	3.17182	-3.45212	0.00380741	0.0499278	-1.7899
Lgr6	-0.318142	4.27269	-3.45171	0.00381056	0.0499291	-1.93592
Sos2	-0.170936	5.71256	-3.45119	0.00381448	0.0499403	-2.11999
Cdkn2aipnl	0.166916	5.30448	3.44903	0.00383107	0.0500917	-2.08393
C1qtnf1	0.462863	2.86885	3.44852	0.00383496	0.0500917	-1.76994
Ppil2	0.153358	5.70254	3.44848	0.00383526	0.0500917	-2.12469
She	-0.48872	2.86727	-3.44712	0.00384577	0.0501888	-1.77228
LOC100909405	-0.316644	3.04723	-3.4447	0.00386445	0.0503139	-1.79183
Rabac1	0.14202	6.97808	3.44452	0.00386583	0.0503139	-2.1863
Cntnap5b	-0.557423	2.35748	-3.44431	0.00386747	0.0503139	-1.74856
Trank1	-0.396686	5.78354	-3.47203	0.00386769	0.0503139	-2.12057
Carmil1	-0.132364	6.36902	-3.4421	0.00388464	0.0504941	-2.17857
Xkr7	-0.311872	3.3691	-3.44115	0.00389202	0.0505167	-1.83139
Synb	-0.333235	2.72177	-3.44108	0.00389257	0.0505167	-1.77324
Top3b	-0.317093	5.06669	-3.43907	0.00390827	0.0506703	-2.07354
Zfp13	0.307841	3.88765	3.43877	0.00391061	0.0506703	-1.90411
LOC100362814	-0.284182	5.65576	-3.43783	0.003918	0.0507257	-2.14035
Safb2	-0.248182	6.36288	-3.43741	0.00392127	0.0507278	-2.18697
Tmem177	0.272353	2.83971	3.43693	0.00392509	0.0507369	-1.78911
LOC103691872	0.317329	3.83833	3.4364	0.00392923	0.0507502	-1.90148
Apaf1	-0.216051	3.91805	-3.43466	0.00394295	0.0508675	-1.91654
Syn3	-0.354361	4.26688	-3.43446	0.00394455	0.0508675	-1.96771
Abcg2	-0.565507	2.95431	-3.43518	0.00395806	0.0510015	-1.804
Lix1	0.179139	5.58659	3.43183	0.00396541	0.0510257	-2.14655
LOC108349633	-0.512174	0.72808	-3.43173	0.0039662	0.0510257	-1.7578
Slc27a1	-0.20709	7.21133	-3.43047	0.00397617	0.0511136	-2.21331
Pnisr	-0.298712	7.2829	-3.4317	0.00399374	0.0512991	-2.21485
Afap1l1	-0.350506	3.58001	-3.42616	0.00401066	0.0514401	-1.885
Emsy	-0.193461	5.47582	-3.42607	0.00401137	0.0514401	-2.14661
LOC108351182	-0.496358	2.54727	-3.42557	0.00401544	0.0514401	-1.79076
Rfx1	-0.280977	4.23436	-3.42533	0.00401733	0.0514401	-1.98086
Prlhr	-0.613179	4.0881	-3.46978	0.00402533	0.0514869	-1.93123
L3mbtl1	-0.515495	3.39053	-3.42792	0.00402729	0.0514869	-1.86263
Dnaja3	0.157622	6.56452	3.4227	0.00403861	0.0515911	-2.22301
Vps28	0.179684	6.50064	3.42213	0.00404319	0.0516092	-2.22228
Mpdz	-0.182971	6.47491	-3.42138	0.00404924	0.0516159	-2.2227
Tmem126b	0.197398	4.51167	3.42128	0.00405004	0.0516159	-2.03132
Ufc1	0.140166	5.93048	3.42077	0.00405425	0.0516227	-2.19659
Rictor	-0.179693	6.39746	-3.42044	0.0040569	0.0516227	-2.22185
Fgd6	-0.343309	3.81777	-3.41943	0.00406511	0.0516868	-1.93009
LOC108351061	1.48378	1.36495	3.52272	0.00407772	0.0517983	-1.73943
Dnajc18	-0.212241	5.44534	-3.41747	0.00408111	0.0517983	-2.16011
Fchsd1	0.39029	4.27528	3.41846	0.00408601	0.0517983	-2.0018
Ralgapa2	-0.268188	4.53299	-3.4168	0.00408658	0.0517983	-2.0423
Tmem39b	-0.264998	3.19328	-3.41577	0.00409507	0.0518656	-1.85939
Apcdd1	-0.294777	4.77097	-3.41474	0.00410353	0.0518952	-2.08091
LOC103691231	-0.500178	2.80416	-3.41447	0.00410575	0.0518952	-1.82708
Sestd1	-0.2025	5.25996	-3.41432	0.00410695	0.0518952	-2.14588
Prss30	0.493136	0.0369874	3.41392	0.00411023	0.0518964	-1.80135
Peg3	-0.319495	10.4737	-3.41533	0.00411839	0.0519434	-2.16033
Mto1	0.217805	4.58141	3.4127	0.00412032	0.0519434	-2.05815
Grin2c	-0.304538	5.80095	-3.41457	0.00412465	0.0519578	-2.20104
Sema5a	-0.226465	6.66331	-3.41145	0.00413064	0.0519931	-2.24696
Pikfyve	-0.152472	6.6295	-3.4091	0.00415012	0.0521981	-2.25109
Plppr4	-0.271897	5.85301	-3.4087	0.00415346	0.0521999	-2.21362
Dctn6	0.167157	5.95583	3.40712	0.00416665	0.0523252	-2.22492
Zfp367	0.235463	4.48483	3.40518	0.0041829	0.052414	-2.05802
Naa20	0.192504	5.57227	3.40516	0.00418306	0.052414	-2.19708
Atxn7	-0.230916	4.40779	-3.40503	0.00418413	0.052414	-2.04633
Sumo1	0.153208	6.51984	3.40474	0.00418656	0.052414	-2.25692
Rps29	0.224954	7.18424	3.40385	0.00419401	0.0524319	-2.26559
Cdc42	0.131733	8.36632	3.4038	0.00419443	0.0524319	-2.24782
Timm50	0.167731	5.34704	3.40279	0.00420294	0.0524981	-2.1785
Smg7	-0.160916	6.53528	-3.40196	0.00420996	0.0525456	-2.26264
Cacna1i	-0.269023	5.19847	-3.40102	0.00421787	0.0526041	-2.16405
Nlgn3	-0.2107	7.13866	-3.39629	0.00425801	0.0530641	-2.28048
Scnn1a	-0.407508	1.73714	-3.39277	0.00428817	0.0533992	-1.82409
Nhs	-0.300222	3.94438	-3.39187	0.00429592	0.0534353	-2.00091
Kif7	-0.315737	3.74184	-3.39167	0.00429762	0.0534353	-1.97193
Kdm4b	-0.16168	6.0641	-3.39011	0.00431111	0.0535622	-2.26481
Me3	0.315141	5.53113	3.39187	0.00431621	0.0535847	-2.2213
Kif21b	-0.25447	6.88962	-3.3882	0.00432765	0.0536859	-2.29558
Mturn	0.241733	7.08875	3.38751	0.0043336	0.0537188	-2.29777
Paxbp1	-0.265577	5.30833	-3.38663	0.00434126	0.0537651	-2.20478
Carmil3	-0.293778	5.60323	-3.38633	0.00434392	0.0537651	-2.23577
Mrpl3	0.161612	5.73585	3.38578	0.0043487	0.0537834	-2.24967
Txnrd3	0.273626	4.2345	3.38453	0.00435958	0.0538772	-2.05921
Atp6v0d1	0.141542	8.35645	3.3835	0.00436861	0.0538852	-2.28772
Bend3	-0.303438	2.95069	-3.38347	0.00436887	0.0538852	-1.89562
Mtap	0.183522	4.83126	3.38332	0.00437014	0.0538852	-2.15124
Dcx	-0.206353	4.92409	-3.38269	0.00437565	0.0539123	-2.16483
Rbm33	-0.285212	6.38278	-3.38422	0.00438017	0.0539274	-2.2942
Ap2s1	0.148184	6.43186	3.38113	0.00438943	0.0540005	-2.30015
Mien1	0.234776	3.91794	3.37986	0.00440053	0.0540929	-2.02045
Timm10b	0.249521	3.7485	3.37952	0.00440357	0.0540929	-1.99639
Grik3	-0.391145	4.39339	-3.38146	0.0044071	0.0540956	-2.09097
Ndufa10	0.174483	7.39473	3.37636	0.00443155	0.0543317	-2.31782
Tmem160	0.243407	4.61022	3.3762	0.004433	0.0543317	-2.13247
Apoo	0.196629	5.09161	3.37549	0.00443927	0.0543677	-2.20117
RGD1306556	-0.248754	5.41962	-3.37469	0.00444639	0.0543797	-2.24029
Irak3	-0.390845	4.13071	-3.37463	0.00444691	0.0543797	-2.06083
Mrps34	0.212433	4.62426	3.37416	0.00445112	0.0543903	-2.13866
Ola1	0.185707	6.64208	3.37347	0.0044573	0.0544251	-2.3211
Myo16	-0.241293	4.0867	-3.37215	0.00446914	0.0545289	-2.06016
Ddx1	0.16034	7.37751	3.36966	0.00449142	0.0546484	-2.33109
Gigyf1	-0.206875	6.26161	-3.36963	0.00449173	0.0546484	-2.3152
Sec22b	0.151349	5.74727	3.36941	0.00449372	0.0546484	-2.28255
Acadm	0.14165	5.97151	3.36919	0.00449567	0.0546484	-2.30002
Baz1b	-0.16165	7.13546	-3.36884	0.0044988	0.0546484	-2.33421
Skor1	-0.42715	3.72344	-3.36882	0.00449904	0.0546484	-2.01152
Tmem204	-0.464297	2.50255	-3.36644	0.00452053	0.0548685	-1.89468
Gla	0.247847	5.32464	3.36581	0.00452622	0.0548968	-2.24747
Chd4	-0.14233	8.34036	-3.3652	0.00453173	0.0549182	-2.32379
Hagh	0.21789	6.21049	3.36467	0.00453655	0.0549182	-2.32255
Slc35d3	0.411796	2.83138	3.36447	0.00453843	0.0549182	-1.92035
Kctd9	0.261325	5.60533	3.3638	0.00454448	0.0549182	-2.28037
Trim23	0.188843	6.01029	3.36356	0.00454669	0.0549182	-2.31333
Sctr	-0.727976	2.07053	-3.37698	0.00454826	0.0549182	-1.87702
Mycbp2	-0.34233	4.15128	-3.3629	0.00455267	0.0549182	-2.08674
Atp6ap2	0.17371	7.25949	3.36266	0.00455491	0.0549182	-2.34574
Rbm14	-0.259186	4.77616	-3.36203	0.00456062	0.0549205	-2.18363
Cstb	0.216791	5.80249	3.3619	0.00456184	0.0549205	-2.30151
Cdc42bpa	-0.163141	7.81071	-3.36042	0.00457538	0.054995	-2.34355
Msantd2	-0.312533	4.47592	-3.36007	0.00457861	0.054995	-2.14222
Naca	0.142469	7.64385	3.3596	0.00458291	0.054995	-2.34759
Slitrk3	-0.350411	5.06386	-3.36434	0.00458341	0.054995	-2.22377
LOC367195	-0.42654	0.39494	-3.35939	0.00458488	0.054995	-1.88365
Cops9	0.160232	5.81822	3.35893	0.00458906	0.0549988	-2.30877
Eif4a3	0.153096	5.70051	3.35862	0.00459194	0.0549988	-2.2996
Plxnb3	-0.407425	6.48129	-3.39892	0.0045993	0.0550465	-2.31946
Ostf1	0.281111	5.03179	3.35668	0.00460986	0.0550881	-2.22934
LOC108350662	-0.293221	3.19878	-3.35646	0.00461183	0.0550881	-1.96948
Otud4	-0.22688	5.8041	-3.35635	0.0046129	0.0550881	-2.31208
Klf8	-0.344141	1.28134	-3.3537	0.00463745	0.0553406	-1.88767
Vps9d1	-0.229854	5.40711	-3.35284	0.00464539	0.0553732	-2.28148
Mrpl42	0.28629	5.26843	3.35268	0.00464697	0.0553732	-2.26624
Lmcd1	-0.407725	3.05011	-3.35036	0.0046686	0.0555904	-1.96523
Srp9	0.168072	5.32702	3.34973	0.00467443	0.0556055	-2.27926
Vps35	0.14108	7.66235	3.34921	0.00467933	0.0556055	-2.36762
Slc9a1	-0.179918	6.37776	-3.34913	0.00468009	0.0556055	-2.36036
Btf3l4	0.191938	4.71226	3.348	0.00469074	0.055647	-2.20215
Cdc34	0.18622	5.05803	3.3477	0.0046935	0.055647	-2.25065
Rraga	0.189158	6.80183	3.34767	0.00469382	0.055647	-2.37422
Slc25a28	0.253838	5.35892	3.34575	0.00471192	0.055821	-2.2902
Zfp469	-0.342362	1.69057	-3.34528	0.0047163	0.0558324	-1.90625
LOC103694146	-0.576516	0.631025	-3.3444	0.00472468	0.0558689	-1.90554
Ramp3	0.343348	3.57837	3.34423	0.00472624	0.0558689	-2.03858
Pipox	0.472488	0.888875	3.34365	0.00473175	0.0558935	-1.90486
Fgfr1op	0.236389	5.18389	3.34148	0.00475242	0.0560971	-2.27824
Ankrd29	0.247523	5.43643	3.34018	0.00476482	0.0562028	-2.30943
LOC100359876	0.237944	4.56009	3.33961	0.00477022	0.0562258	-2.19526
Plat	-0.201343	6.10779	-3.3383	0.00478276	0.056333	-2.36828
Plod3	-0.268253	5.28567	-3.33701	0.00479521	0.0564294	-2.29841
Wdr81	-0.194552	4.86724	-3.33673	0.00479786	0.0564294	-2.2458
LOC680142	0.212957	4.7112	3.33594	0.00480548	0.0564782	-2.22509
Sf3b3	-0.206888	5.8511	-3.33553	0.00480937	0.0564833	-2.35644
Tarbp1	-0.331971	3.23756	-3.33453	0.00481904	0.0565174	-2.01419
Amotl1	-0.276557	6.50581	-3.33482	0.00482058	0.0565174	-2.39292
Acot9	0.19472	5.21726	3.33381	0.00482605	0.0565174	-2.29734
Evc2	-0.431392	2.80375	-3.33363	0.00482775	0.0565174	-1.9742
Pde6d	0.154344	5.48842	3.33315	0.00483241	0.0565174	-2.32888
Celsr1	-0.382397	4.70633	-3.34037	0.00483306	0.0565174	-2.22339
Tshz3	-0.258727	4.46501	-3.33267	0.00483704	0.0565234	-2.19354
Acox1	-0.139898	6.67371	-3.3316	0.00484746	0.0566046	-2.40351
Gnal	0.272273	7.07347	3.33007	0.00486496	0.0567683	-2.41026
Cmc1	0.335569	2.43679	3.32916	0.0048712	0.0567709	-1.95804
Nap1l4	0.158211	7.61116	3.32906	0.00487214	0.0567709	-2.40764
Lekr1	-0.340597	2.24163	-3.3285	0.00487763	0.0567908	-1.95016
Rpl23a	0.137098	7.58943	3.32789	0.00488358	0.0567908	-2.41021
LOC100363520	-0.548839	1.17114	-3.32766	0.0048859	0.0567908	-1.93188
Kcnq3	-0.338482	5.71834	-3.33993	0.00488778	0.0567908	-2.35225
Sorcs3	-0.320394	4.99207	-3.32514	0.00491055	0.0570024	-2.28418
Rnf13	0.209921	6.44352	3.3249	0.00491297	0.0570024	-2.41015
Syt15	0.733234	1.60596	3.33163	0.00491721	0.057011	-1.93807
Cachd1	-0.240435	5.76528	-3.32311	0.00493064	0.057126	-2.37357
Hebp2	0.333048	4.29902	3.32146	0.00494696	0.0572438	-2.1891
Sdk2	-0.306063	5.10858	-3.3212	0.0049495	0.0572438	-2.30716
Vamp3	0.168832	6.03017	3.32102	0.00495133	0.0572438	-2.39754
Rsrc1	0.174225	5.71218	3.31982	0.0049632	0.0573404	-2.37599
Ndufaf1	0.208058	4.74537	3.31923	0.00496908	0.0573505	-2.26225
Anapc1	-0.265457	6.49627	-3.31903	0.0049711	0.0573505	-2.42291
Frmpd3	-0.31462	5.81674	-3.32274	0.00499473	0.0575488	-2.38578
Fbxl7	-0.335669	3.45873	-3.3166	0.00499534	0.0575488	-2.07418
LOC102547700	0.413759	1.19144	3.31482	0.00501317	0.057612	-1.95393
Fbn1	-0.4689	4.77156	-3.34725	0.00501384	0.057612	-2.25125
Ikzf4	-0.396941	2.14032	-3.31421	0.00501937	0.057612	-1.97184
Hcfc1	-0.211328	5.58134	-3.31365	0.00502496	0.057612	-2.37555
Duox2	0.821709	2.30951	3.3465	0.00502504	0.057612	-1.96477
Pprc1	-0.172757	4.72929	-3.3132	0.00502953	0.057612	-2.27144
LOC102549694	-0.402828	1.46751	-3.31307	0.00503085	0.057612	-1.95916
RGD1565071	0.700486	0.709109	3.31294	0.00503215	0.057612	-1.9577
Tceal8	0.195787	6.06493	3.31289	0.00503262	0.057612	-2.41547
Psmc5	0.185808	7.96259	3.31238	0.00503784	0.0576313	-2.4348
LOC108351137	0.307148	3.27342	3.31139	0.00504781	0.057705	-2.06133
Ica1	0.224921	5.56494	3.30751	0.00508721	0.0581146	-2.38606
Urm1	0.225596	5.26824	3.30637	0.00509888	0.0582071	-2.35638
Ethe1	0.259283	3.97126	3.30574	0.00510529	0.0582395	-2.16869
Pak1	0.278992	8.03161	3.30527	0.00513275	0.0584476	-2.45013
Kctd14	-0.734886	3.95605	-3.37461	0.0051331	0.0584476	-2.12385
Pigq	-0.1613	6.86095	-3.30291	0.00513427	0.0584476	-2.46212
Dhx57	-0.194843	6.07557	-3.30179	0.00514582	0.058527	-2.4375
Mrpl41	0.170007	5.04736	3.30154	0.00514843	0.058527	-2.33856
Atp6v0e2	0.179701	6.98652	3.30081	0.00515596	0.0585718	-2.46708
LOC108349561	0.218256	6.30946	3.30025	0.0051617	0.0585962	-2.45282
Spry4	-0.4016	4.27799	-3.30269	0.00518201	0.0587859	-2.22617
Use1	0.192327	5.39444	3.29706	0.00519485	0.0588522	-2.38886
Pdcl3	0.172003	4.91558	3.29704	0.00519507	0.0588522	-2.32946
Eral1	0.240657	4.56341	3.29654	0.00520027	0.0588597	-2.27838
Psmd13	0.155383	6.59636	3.29628	0.00520294	0.0588597	-2.47067
Taf13	0.22259	5.51373	3.2958	0.00520797	0.0588757	-2.40372
Ttll8	-0.543755	2.22806	-3.29491	0.00521725	0.0589398	-2.00967
Lrfn1	-0.237061	5.13111	-3.29261	0.00524142	0.0591113	-2.36587
Adck3	0.20769	4.79805	3.29254	0.00524208	0.0591113	-2.3213
Tmem200c	-0.270282	5.77196	-3.29243	0.0052433	0.0591113	-2.43356
Rtcb	0.157177	6.47323	3.29126	0.00525555	0.0592024	-2.47689
Sh2b3	-0.213673	4.24796	-3.29097	0.00525864	0.0592024	-2.23973
Fhdc1	-0.268137	4.50767	-3.29044	0.0052642	0.0592138	-2.28091
Rpl7a	0.150526	7.67116	3.29018	0.00526692	0.0592138	-2.48264
Prmt1	0.181473	6.20438	3.28943	0.00527493	0.0592471	-2.46901
Gltscr1l	-0.24955	5.53094	-3.28922	0.00527714	0.0592471	-2.41771
LOC103692665	1.022	0.832583	3.32234	0.00529552	0.0594125	-1.98685
Barhl1	1.22752	1.8417	3.36922	0.00531103	0.0595456	-1.97692
Kat6a	-0.196288	6.63973	-3.28493	0.00532267	0.0596328	-2.49358
Col11a2	-0.363065	7.16213	-3.31084	0.00532869	0.0596328	-2.48095
Cpne5	-0.383367	5.60979	-3.30841	0.00532977	0.0596328	-2.41811
Bmp1	-0.267657	5.38777	-3.28379	0.0053348	0.0596481	-2.41303
Klhdc2	0.159575	7.04989	3.28319	0.00534124	0.0596792	-2.50158
Spcs1	0.149445	6.09119	3.28185	0.00535563	0.0597991	-2.47763
Rnf181	0.146565	5.78854	3.27954	0.00538042	0.0600347	-2.46083
Flot1	0.165456	6.5256	3.27882	0.00538822	0.0600807	-2.50279
Tmem245	-0.170209	7.27924	-3.27773	0.00539998	0.0601393	-2.51124
Chchd6	0.221307	5.02209	3.27728	0.00540493	0.0601393	-2.38182
Dhps	0.183684	5.21606	3.27724	0.00540535	0.0601393	-2.40672
LOC102555377	0.282642	3.24305	3.27697	0.00540822	0.0601393	-2.12149
Tmem178b	-0.263907	7.39082	-3.27538	0.00542545	0.0602898	-2.51473
Psd2	-0.202866	7.94369	-3.27277	0.00545395	0.0605652	-2.51225
Npc2	0.254089	7.08834	3.27136	0.00546935	0.060695	-2.52443
LOC103690979	0.5578	0.284791	3.26973	0.00548728	0.0608525	-2.03383
Calr4	0.572769	1.82681	3.2693	0.005492	0.0608634	-2.0416
Smtn	-0.380414	2.87165	-3.2685	0.00550084	0.06092	-2.09849
Adra1b	0.26682	3.46251	3.26629	0.00552523	0.0611486	-2.16886
Morc2	-0.165847	5.38248	-3.26572	0.00553149	0.061159	-2.44809
Brk1	0.177712	6.83816	3.26553	0.00553367	0.061159	-2.53484
Mylk	-0.350836	6.40584	-3.28505	0.0055568	0.0613731	-2.5131
Jarid2	-0.150823	5.4205	-3.26212	0.00557153	0.0614941	-2.45931
Pepd	0.152432	5.84718	3.26163	0.005577	0.0615057	-2.50026
Zfp483	-0.273043	5.58813	-3.26131	0.00558065	0.0615057	-2.47735
Fam65a	-0.165981	6.02741	-3.26084	0.00558594	0.0615057	-2.5143
Fastkd2	0.211094	3.83981	3.26068	0.00558765	0.0615057	-2.23392
Gadd45g	-0.535152	4.11647	-3.29061	0.00560508	0.0616184	-2.25705
Bloc1s1	0.219743	4.9894	3.25909	0.00560545	0.0616184	-2.41254
Yipf1	0.168257	5.54764	3.25872	0.00560962	0.0616227	-2.47927
RGD1562465	-0.458064	1.7412	-3.25817	0.00561583	0.0616494	-2.05907
Prelid3a	-0.227859	4.76678	-3.25773	0.0056208	0.0616625	-2.38324
Lzts3	-0.196714	6.27943	-3.2572	0.00562681	0.0616646	-2.53517
Rfc4	0.256091	3.19472	3.25672	0.00563216	0.0616646	-2.15332
Sema6d	-0.207682	7.56313	-3.25643	0.00563546	0.0616646	-2.54977
Kdm2a	-0.143286	6.71719	-3.25637	0.00563611	0.0616646	-2.5509
Ppp2r3c	0.185669	4.29531	3.25365	0.00566689	0.0618992	-2.31873
Ankrd44	-0.223912	5.07614	-3.25306	0.0056736	0.0618992	-2.43531
Prrc2b	-0.22358	8.97374	-3.25285	0.00567606	0.0618992	-2.52489
Smad5	-0.161808	6.28924	-3.25281	0.00567643	0.0618992	-2.54426
LOC684988	0.371954	1.06875	3.25281	0.00567653	0.0618992	-2.05924
Mcf2l	-0.20818	7.09651	-3.24978	0.00571105	0.0622027	-2.56644
Cabin1	-0.173389	6.08627	-3.2497	0.00571199	0.0622027	-2.53958
Dnmt1	-0.147957	5.52298	-3.24869	0.00572356	0.0622871	-2.49609
Nxf1	-0.248831	6.50836	-3.24709	0.00574188	0.0624448	-2.56348
Vars2	-0.16236	4.53459	-3.24541	0.00576124	0.0626137	-2.37202
Ankrd12	-0.187508	5.86268	-3.24472	0.00576919	0.0626187	-2.53395
Ubr5_1	-0.194778	5.11436	-3.24471	0.00576938	0.0626187	-2.45656
Smim12	0.238253	4.6971	3.24401	0.00577748	0.0626649	-2.39947
Smad1	-0.155887	4.74397	-3.24365	0.0057816	0.0626679	-2.40735
Kcnj8	-0.312166	1.84317	-3.24309	0.00578807	0.0626964	-2.08792
Crebbp	-0.24825	5.75782	-3.24272	0.00579241	0.0627018	-2.52904
Stub1	0.135844	7.198	3.23975	0.005827	0.063016	-2.58582
Prr13	0.139921	5.37613	3.23956	0.00582916	0.063016	-2.49832
Tfap2a	-0.485972	2.76324	-3.23901	0.00583555	0.0630432	-2.14261
Wnt2b	0.673819	1.81553	3.24282	0.00584024	0.0630522	-2.09307
Trne	0.567232	0.555488	3.23827	0.00584427	0.0630539	-2.08376
Serpina11	0.484232	1.48064	3.23521	0.0058802	0.0633978	-2.09395
Ank2	-0.208313	10.4106	-3.23489	0.00588391	0.0633978	-2.50948
Rnf165	-0.411363	2.76398	-3.23387	0.00589604	0.0634865	-2.1521
Rps17	0.165829	6.69349	3.2332	0.00590392	0.0635026	-2.59564
Spag7	0.141983	5.5368	3.23238	0.0059136	0.0635026	-2.52929
Trappc6b	0.152325	5.62814	3.23226	0.00591507	0.0635026	-2.53837
LOC100911221	-0.387167	4.25944	-3.234	0.00591915	0.0635026	-2.35115
Apmap	0.167066	5.45856	3.23181	0.00592043	0.0635026	-2.52215
Rbx1	0.165033	6.10051	3.23177	0.00592089	0.0635026	-2.57549
LOC103694355	-0.509311	2.83585	-3.23084	0.00593192	0.0635631	-2.16361
LOC108352464	-0.610524	1.02027	-3.23063	0.00593432	0.0635631	-2.09669
Nr6a1	-0.336075	2.9954	-3.22968	0.00594563	0.0636343	-2.18115
Arhgap23	-0.221457	7.57195	-3.22942	0.00594878	0.0636343	-2.60219
Shmt2	0.19428	5.45852	3.22901	0.00595363	0.0636445	-2.52745
Rnaseh2a	0.166772	5.5915	3.22714	0.00597605	0.0638424	-2.54472
Cntnap3b	-0.332276	2.87415	-3.22636	0.00598539	0.0639004	-2.17551
Prickle1	-0.207354	5.63202	-3.22408	0.00601272	0.0641013	-2.5541
Nmrk1	0.244041	3.09205	3.22366	0.0060178	0.0641013	-2.20263
Ccdc84	-0.273933	3.07245	-3.22292	0.00602671	0.0641013	-2.20171
Plekhn1	-0.366177	2.55831	-3.22289	0.00602711	0.0641013	-2.15621
Paics	0.207799	4.59029	3.22288	0.0060272	0.0641013	-2.4238
LOC108348101	-0.456542	0.230269	-3.22239	0.00603317	0.0641013	-2.11268
Hspbp1	0.180394	5.94379	3.22219	0.00603554	0.0641013	-2.58393
Sfswap	-0.215132	5.52259	-3.22218	0.00603565	0.0641013	-2.54697
Scarf2	0.356704	3.31434	3.22127	0.00604674	0.0641773	-2.23292
Baz2a	-0.249535	5.96553	-3.22015	0.00606024	0.0642788	-2.58871
Cul9	-0.162675	5.96882	-3.21951	0.00606804	0.0643196	-2.59071
Kyat3	0.244345	3.51806	3.21911	0.00607291	0.0643226	-2.26439
Phlda3	0.201954	5.70635	3.2188	0.00607672	0.0643226	-2.57143
Ints6	-0.245584	4.54846	-3.21851	0.00608015	0.0643226	-2.42501
Atp5a1	0.136193	9.76257	3.2161	0.00610967	0.064593	-2.56982
RGD1304704	0.133921	6.253	3.21516	0.00612113	0.0646723	-2.61597
Drgx	-0.478104	2.51392	-3.21297	0.00614803	0.0648906	-2.1709
Higd2a	0.163018	5.09065	3.21267	0.00615177	0.0648906	-2.51575
Lrrc2	-0.364731	1.5283	-3.21177	0.00616286	0.0648906	-2.13538
Rfk	0.156186	5.61023	3.21176	0.00616292	0.0648906	-2.57631
Slc7a5	-0.239838	5.89334	-3.21176	0.00616294	0.0648906	-2.59993
Hspa9	0.159384	7.70386	3.21104	0.00617187	0.0648906	-2.63617
Mob4	0.146314	6.19924	3.21092	0.00617339	0.0648906	-2.62144
Pcdhga11	0.417623	3.05129	3.21074	0.00617558	0.0648906	-2.22156
Nptn	0.184892	8.69887	3.21058	0.0061776	0.0648906	-2.61518
Myo9a	-0.193397	6.15719	-3.21014	0.00618297	0.0648945	-2.62042
U2af1l4	0.173678	5.19629	3.2098	0.00618724	0.0648945	-2.53455
Fbrs	-0.171065	5.9314	-3.2095	0.00619092	0.0648945	-2.60744
Taok1	-0.183862	6.14379	-3.20926	0.00619388	0.0648945	-2.62141
Tceb1	0.152921	5.7082	3.20857	0.00620252	0.0649167	-2.59161
Notch4	-0.240715	3.76519	-3.20841	0.00620448	0.0649167	-2.32043
Tmem8b	-0.185835	5.97198	-3.20813	0.00620794	0.0649167	-2.61287
Gabarap	0.153331	7.29848	3.20433	0.00625539	0.0653344	-2.65398
Dnaja1	0.149118	8.16642	3.20429	0.00625589	0.0653344	-2.64111
LOC497899	0.402398	1.43483	3.20342	0.00626679	0.0654063	-2.1481
Slc43a2	-0.226402	6.52701	-3.20295	0.00627272	0.0654264	-2.64996
Lamtor5	0.17305	5.0358	3.2021	0.00628329	0.065494	-2.52874
Hras	0.215323	5.81537	3.20153	0.00629053	0.065494	-2.61409
Kat5	0.183128	5.86878	3.20147	0.00629125	0.065494	-2.61849
Dnajc13	-0.158095	6.17339	-3.20092	0.00629823	0.0655249	-2.63929
Thbs4	-1.25978	2.40908	-3.29698	0.00633775	0.0658885	-2.14373
Aimp1	0.169661	4.99539	3.19694	0.00634861	0.0658885	-2.53329
LOC100910200	-0.426685	0.720278	-3.19693	0.00634878	0.0658885	-2.15272
Ddx31	-0.381555	3.08625	-3.1961	0.0063593	0.0658885	-2.25213
Dopey2	-0.205055	6.09746	-3.19561	0.00636551	0.0658885	-2.64507
Golga5	0.158804	5.13246	3.19518	0.00637097	0.0658885	-2.55484
Vmp1	0.218838	7.07765	3.1949	0.00637457	0.0658885	-2.67325
Rif1	-0.269419	4.77322	-3.19444	0.00638052	0.0658885	-2.50532
Drd2	-0.262824	4.52728	-3.19441	0.00638089	0.0658885	-2.46761
Unc5d	-0.319615	6.17796	-3.20707	0.0063819	0.0658885	-2.64283
Mtx2	0.193161	5.29009	3.19419	0.00638369	0.0658885	-2.5759
Abca5	-0.182633	6.27478	-3.19418	0.00638377	0.0658885	-2.65741
Ypel5	0.175198	7.13344	3.19382	0.00638845	0.0658885	-2.6753
Sbf2	-0.14452	6.14277	-3.19345	0.0063931	0.0658885	-2.65214
Faxc	-0.223444	3.92663	-3.19333	0.00639469	0.0658885	-2.37395
Ndufb3	0.164583	6.14235	3.19288	0.00640045	0.0658885	-2.6533
NEWGENE_1590969	-0.351885	1.3549	-3.19277	0.00640184	0.0658885	-2.16511
Bloc1s5	0.179343	5.238	3.19245	0.00640591	0.0658888	-2.57313
Rpl6	0.17938	7.41138	3.18985	0.00643937	0.0661677	-2.68101
Ankmy2	0.16726	6.74184	3.18971	0.00644114	0.0661677	-2.68096
Ehd2	-0.288806	3.4539	-3.18781	0.00646571	0.0662926	-2.31333
Taf4	-0.243279	4.20184	-3.18764	0.00646787	0.0662926	-2.42861
Nars	0.193922	7.9648	3.18758	0.00646871	0.0662926	-2.6775
Eif3i	0.194467	5.30328	3.18752	0.00646955	0.0662926	-2.59029
Scaf4	-0.167056	5.56782	-3.18684	0.00647833	0.0663409	-2.62017
LOC102552123	-0.460046	0.711574	-3.18618	0.0064869	0.0663869	-2.17078
Pcnx3	-0.192756	6.31218	-3.18383	0.0065175	0.0666583	-2.67918
Gmfb	0.1531	8.2171	3.18328	0.00652464	0.0666895	-2.68073
Trappc3	0.144989	5.99309	3.18195	0.00654206	0.0668257	-2.66539
LOC690422	0.318475	3.04085	3.18011	0.0065662	0.0670303	-2.27673
LOC102553382	-0.44908	2.90717	-3.17822	0.00659106	0.067242	-2.26601
Lzts1	0.302895	4.98855	3.17731	0.00660305	0.0673017	-2.56914
LOC102553457	0.496118	0.107462	3.17715	0.00660516	0.0673017	-2.18841
Bdh1	0.232035	5.4035	3.17655	0.00661309	0.0673234	-2.62268
Setd2	-0.173492	6.34905	-3.17637	0.00661555	0.0673234	-2.69532
Pdlim7	0.174366	5.45304	3.1752	0.00663104	0.067439	-2.63091
Zdhhc8	-0.153132	5.70616	-3.17475	0.00663698	0.0674573	-2.65666
Arhgef1	-0.180184	5.9008	-3.17339	0.00665512	0.0675357	-2.67511
Npas3	-0.262931	4.53874	-3.17329	0.00665642	0.0675357	-2.5097
Plcg1	-0.157156	7.08545	-3.17324	0.00665711	0.0675357	-2.71531
Naa38	0.15466	5.25706	3.17288	0.00666194	0.0675427	-2.61325
Disp2	-0.283042	9.14091	-3.17432	0.0066693	0.0675754	-2.67433
Setd1b	-0.162484	5.91264	-3.17187	0.00667541	0.0675952	-2.679
Tenm4	-0.277167	6.76974	-3.17381	0.00668724	0.067673	-2.71527
Cecr2	-0.28827	4.07584	-3.17045	0.00669443	0.0677038	-2.44052
Eif2a	0.168906	5.34427	3.16981	0.00670302	0.0677253	-2.62927
Coro1b	0.148255	6.60345	3.16917	0.00671155	0.0677253	-2.71802
Mrpl15	0.160935	5.88053	3.1689	0.00671517	0.0677253	-2.6825
Atp5s	0.225353	3.96611	3.16865	0.0067186	0.0677253	-2.42701
Pigk	0.167745	6.00957	3.16835	0.00672263	0.0677253	-2.69272
Ulk2	-0.115825	6.7532	-3.16766	0.00673188	0.0677253	-2.72395
Ttc9	0.310895	5.7331	3.17468	0.00673694	0.0677253	-2.6678
Abcc10	-0.209234	3.4103	-3.16725	0.00673747	0.0677253	-2.34581
Araf	0.141717	7.5062	3.16718	0.00673837	0.0677253	-2.72395
Hmbs	0.245044	4.15892	3.16704	0.00674021	0.0677253	-2.46101
Kcng1	-0.525728	2.69082	-3.1672	0.00674337	0.0677253	-2.26689
Sema3b	0.256112	4.23292	3.16655	0.00674693	0.0677253	-2.47388
Aadat	0.313645	3.5714	3.16628	0.00675052	0.0677253	-2.3701
Polr1d	0.165657	4.66498	3.16536	0.00676295	0.0678059	-2.54559
Atg2a	-0.120573	6.06913	-3.16507	0.00676687	0.0678059	-2.70288
Ercc2	-0.24328	4.60652	-3.16437	0.00677635	0.0678592	-2.5376
Stard10	0.189925	5.58442	3.16205	0.00680795	0.0681338	-2.66979
LOC103693776	-0.55811	0.234023	-3.16091	0.0068234	0.0682466	-2.21412
Paip2	0.137101	7.35347	3.16057	0.00682808	0.0682515	-2.73844
LOC102549127	0.593562	1.47772	3.1597	0.00684005	0.0682911	-2.22431
Crybg3	-0.272836	5.22106	-3.15916	0.00684739	0.0682911	-2.63425
Mafg	-0.152483	6.62704	-3.15916	0.00684743	0.0682911	-2.73788
Rimbp2	-0.27667	6.05452	-3.16104	0.00684878	0.0682911	-2.71148
Trpc7	-0.262271	3.72237	-3.15704	0.00687645	0.0684841	-2.40995
Rpl29	0.149797	6.99438	3.15704	0.00687654	0.0684841	-2.74672
Atrx	-0.174149	6.7303	-3.15648	0.0068842	0.0685186	-2.7451
Traf3	-0.23483	6.38226	-3.15561	0.0068962	0.0685962	-2.73662
Lmtk2	-0.181923	7.12408	-3.15482	0.00690711	0.0686628	-2.7509
LOC108351200	0.589185	2.51904	3.15871	0.00692089	0.0687579	-2.27464
Fkbp2	0.173693	6.59082	3.15288	0.00693394	0.0688158	-2.74919
LOC108348147	-0.248618	4.42367	-3.1528	0.00693515	0.0688158	-2.53052
Wdr83	0.245286	4.0502	3.15232	0.00694178	0.0688397	-2.47124
Cpeb4	-0.180763	7.09972	-3.1514	0.00695452	0.0689241	-2.75758
Itpa	0.164688	5.11495	3.14881	0.00699079	0.0691708	-2.64179
Cct4	0.121268	7.28158	3.14859	0.00699375	0.0691708	-2.76227
Ufsp2	0.198973	5.74865	3.14813	0.00700022	0.0691708	-2.71181
Rubcn	-0.119125	6.87597	-3.14785	0.00700416	0.0691708	-2.76382
Tox3	-0.281036	2.95118	-3.14781	0.00700472	0.0691708	-2.32613
Bap1	0.129943	7.13538	3.1478	0.00700485	0.0691708	-2.7646
Syt14	-0.178037	5.08788	-3.14713	0.00701432	0.0692224	-2.64108
2007-09-01	0.213217	8.36903	3.14669	0.00702045	0.069241	-2.74792
Aff3	-0.186382	6.48673	-3.14583	0.00703251	0.069246	-2.75962
Cds2	-0.260522	6.57341	-3.14613	0.00703371	0.069246	-2.76184
Cyp4f1	-0.291965	3.65233	-3.14541	0.00703843	0.069246	-2.42086
Adhfe1	0.299274	5.91711	3.1508	0.0070419	0.069246	-2.7266
Acaca	-0.174094	7.04585	-3.14502	0.00704397	0.069246	-2.76998
Pxdn	-0.376909	4.34265	-3.14875	0.00704643	0.069246	-2.52876
Ldhd	0.223203	5.14205	3.14394	0.00705919	0.0693296	-2.6543
Abl2	-0.162066	5.42099	-3.14265	0.00707746	0.0694672	-2.69008
Med12l	-0.224838	3.46853	-3.1415	0.00709375	0.0695788	-2.40156
Preb	0.147286	5.76434	3.14124	0.00709735	0.0695788	-2.72664
C1qtnf9	0.546206	2.70023	3.14289	0.00710169	0.0695795	-2.31352
Adora2a	-0.330769	3.03025	-3.13989	0.00711668	0.0696766	-2.34893
Lxn	0.301753	5.46569	3.14239	0.00712015	0.0696766	-2.69832
Rpl38	0.170635	6.2967	3.13878	0.00713239	0.0697546	-2.76594
Pds5b	-0.167694	7.46141	-3.13759	0.00714937	0.0698674	-2.78175
Etfa	0.253545	6.41518	3.13738	0.00715248	0.0698674	-2.77339
Mtmr12	-0.27292	4.28734	-3.13497	0.00718698	0.0701421	-2.54207
Immp2l	0.368181	1.68362	3.13467	0.00719137	0.0701421	-2.27276
Rpap1	-0.166009	4.55131	-3.13423	0.00719766	0.0701421	-2.58691
Proser1	-0.237606	4.32006	-3.13422	0.00719781	0.0701421	-2.54916
Stmn3	0.240024	8.92897	3.1335	0.00720816	0.070201	-2.75751
Adamts16	-0.529506	0.560837	-3.13183	0.00723224	0.0703573	-2.26158
Dyrk1a	-0.133417	6.59247	-3.13152	0.00723685	0.0703573	-2.79059
Polr2a	-0.182629	7.20497	-3.13124	0.0072409	0.0703573	-2.79627
RGD1562080	-0.379637	1.33075	-3.13101	0.0072442	0.0703573	-2.27082
Pkib	-0.378492	2.85797	-3.13072	0.00724843	0.0703573	-2.34765
Atp6v0a4	-0.303908	2.52645	-3.1306	0.00725009	0.0703573	-2.31948
Phlpp2	-0.237411	5.47121	-3.12885	0.00727557	0.070535	-2.72169
Timm10	0.213509	4.41742	3.12861	0.00727901	0.070535	-2.5761
Sdhaf3	0.261385	3.08015	3.12845	0.00728137	0.070535	-2.37568
LOC100360508	0.406332	1.75743	3.12699	0.0073027	0.0706997	-2.28823
Ddx46	-0.142569	6.48225	-3.1263	0.0073128	0.0707554	-2.79744
En2	-0.608323	1.08431	-3.12556	0.00732358	0.0708177	-2.27604
Hspa4l	0.138796	8.46182	3.12509	0.00733044	0.0708299	-2.78733
Acer2	-0.435633	3.18252	-3.12488	0.00733352	0.0708299	-2.39369
RGD1304728	-0.278738	4.53165	-3.1223	0.00737148	0.0711544	-2.6056
Mecp2	-0.154904	7.20303	-3.12148	0.00738362	0.0712294	-2.81521
Fam162a	0.157742	5.99267	3.12105	0.00738998	0.0712487	-2.78311
Ak6	0.25582	3.377	3.11967	0.00741038	0.0714031	-2.42928
Asna1	0.169948	6.4974	3.11723	0.00744667	0.0717105	-2.81557
RGD1561931	-0.327188	4.93757	-3.11966	0.00745554	0.0717463	-2.67557
Tmem208	0.21814	4.48395	3.11639	0.00745919	0.0717463	-2.61003
Tcea1	0.139202	6.28176	3.11534	0.00747483	0.0718543	-2.81067
Eif4b	0.132122	7.59947	3.11433	0.00748991	0.0719439	-2.82508
Npy1r	-0.333087	3.1982	-3.11413	0.00749296	0.0719439	-2.41574
Ssh1	-0.205434	4.28667	-3.11364	0.00750032	0.0719722	-2.58288
Slc16a4	-0.417657	1.59178	-3.11258	0.00751627	0.0720548	-2.30854
Ntrk2	-0.168194	9.91611	-3.11248	0.00751776	0.0720548	-2.76426
Kif13a	-0.159831	6.16942	-3.11192	0.00752611	0.0720925	-2.81134
Phrf1	-0.179498	5.90321	-3.11129	0.0075357	0.072142	-2.79529
Plpp1	0.160292	5.15887	3.10974	0.00755897	0.0722887	-2.72241
Alpk2	-0.466347	0.85436	-3.10968	0.00755989	0.0722887	-2.30036
Emid1	-0.279258	4.57828	-3.10933	0.00756518	0.0722969	-2.63772
Unc5c	-0.235904	5.57261	-3.10901	0.00757005	0.0723011	-2.77035
Ints2	-0.224838	4.27705	-3.10847	0.00757821	0.0723366	-2.59093
Iah1	0.156739	4.22728	3.10715	0.0075983	0.0724575	-2.5859
Amer3	-0.312777	4.14041	-3.10705	0.00759976	0.0724575	-2.57045
Atf7	-0.19261	5.33755	-3.10514	0.00762896	0.0726935	-2.75264
Tmem234	0.283856	3.54341	3.10397	0.00764676	0.0727987	-2.482
Grifin	1.61541	1.00299	3.20549	0.00765233	0.0727987	-2.26842
Actr2	0.118679	8.43804	3.10354	0.00765339	0.0727987	-2.8296
Brsk2	-0.177336	5.98464	-3.10263	0.00766727	0.0728616	-2.81784
Cep350	-0.238384	5.97556	-3.10244	0.00767012	0.0728616	-2.8172
Sema3d	-0.265935	4.32339	-3.10164	0.0076825	0.0728616	-2.61124
Zfp180	0.275364	6.58266	3.10531	0.00768408	0.0728616	-2.84535
Tceal9	0.159656	6.34728	3.10137	0.00768661	0.0728616	-2.8406
Ltbp1	-0.475575	3.1172	-3.10325	0.0076868	0.0728616	-2.42769
Hdac7	-0.276288	4.44146	-3.10105	0.00769155	0.0728643	-2.63152
Camsap3	-0.196198	5.15869	-3.10056	0.00769914	0.0728644	-2.73957
Mier2	-0.158229	4.78084	-3.1003	0.00770312	0.0728644	-2.68732
Cit	-0.205629	6.77603	-3.09992	0.00770896	0.0728644	-2.85519
Ccdc91	0.128805	5.75737	3.09989	0.00770943	0.0728644	-2.80586
Nmur2	-0.64352	1.65366	-3.10146	0.00771426	0.0728678	-2.33171
Arid3a	-0.257719	3.21717	-3.0986	0.00772935	0.0729618	-2.44684
Cyth3	-0.168356	5.37166	-3.09835	0.00773315	0.0729618	-2.76971
Slc6a1	-0.221117	9.55345	-3.09766	0.00774385	0.0729963	-2.80595
Irf2bp2	-0.177382	5.40878	-3.09754	0.00774576	0.0729963	-2.77544
Nup210	-0.204491	4.18578	-3.09623	0.00776609	0.0731136	-2.59921
Id2	0.157946	5.61572	3.09616	0.00776717	0.0731136	-2.79997
Lcp1	0.306003	5.23606	3.09814	0.0077747	0.0731422	-2.75646
Nabp2	0.124867	5.98342	3.09522	0.00778174	0.0731663	-2.83243
Ptpn11	0.160565	8.90297	3.09285	0.00781865	0.0734441	-2.83679
Cpt1a	-0.202319	6.35667	-3.09275	0.00782029	0.0734441	-2.85729
Abcg3l4	-0.440107	2.4386	-3.09059	0.00785406	0.0737188	-2.38458
Gatsl2	-0.272968	7.03943	-3.09147	0.00789901	0.0740829	-2.87785
Uhrf2	-0.160571	5.92757	-3.08755	0.00790195	0.0740829	-2.84294
Chmp6	0.155003	4.72359	3.08726	0.00790647	0.0740829	-2.70373
Cope	0.156947	6.31234	3.08663	0.00791654	0.0741072	-2.86747
Rbm15	-0.230063	3.2925	-3.08653	0.00791815	0.0741072	-2.47889
LOC108349455	0.406964	1.05247	3.08597	0.007927	0.0741474	-2.34295
LOC684819	-0.39003	0.0544786	-3.08549	0.0079345	0.074175	-2.33913
Tspan9	-0.182155	5.82096	-3.08495	0.00794312	0.0742016	-2.8396
Urod	0.182025	5.52368	3.08474	0.00794644	0.0742016	-2.81266
Itga1	-0.685858	2.50673	-3.10295	0.0079619	0.074272	-2.39113
Snapin	0.139176	6.54494	3.0837	0.00796308	0.074272	-2.88186
Cyp2d4	-0.201825	4.92726	-3.08322	0.00797069	0.0743005	-2.74124
Ulk3	-0.208198	3.29397	-3.0829	0.00797568	0.0743046	-2.4858
Ift52	0.136068	5.803	3.0821	0.00798846	0.0743812	-2.84399
Zfp292	-0.155898	5.44446	-3.08162	0.00799623	0.074411	-2.81005
Nufip1	0.190756	4.27079	3.08132	0.00800096	0.0744126	-2.6418
Stxbp5	-0.173409	7.14592	-3.07997	0.00802265	0.0745718	-2.89565
Napb	0.281352	8.62873	3.08239	0.00804317	0.0746845	-2.86955
Rbm43	-0.351716	2.63047	-3.07864	0.00804393	0.0746845	-2.42086
Atp6v1a	0.189442	9.07344	3.078	0.00805422	0.0747375	-2.86004
Lmo7	-0.460979	3.24989	-3.07956	0.00805891	0.0747385	-2.48749
Birc7	0.484659	1.23848	3.07579	0.0080899	0.0749833	-2.36356
Morn2	0.468456	2.09902	3.07477	0.00810648	0.0750943	-2.39293
Layn	0.660654	3.49102	3.11341	0.00811585	0.0751384	-2.50261
LOC103692027	-0.510308	0.713004	-3.0725	0.00814331	0.0753499	-2.36164
Ubac1	0.130711	6.00087	3.0714	0.00816115	0.0754355	-2.87947
Bckdk	0.184166	5.67621	3.07136	0.00816182	0.0754355	-2.85339
Grk5	-0.164805	5.2332	-3.07073	0.00817209	0.0754877	-2.80628
Usp9x	-0.149805	8.83312	-3.06985	0.00818653	0.0755357	-2.88324
Map1lc3b	0.194751	8.28095	3.06985	0.00818655	0.0755357	-2.89852
Aes	0.160725	8.8112	3.06829	0.00821209	0.075618	-2.88692
Pdp2	0.222745	3.63033	3.06806	0.0082159	0.075618	-2.5621
Orc4	0.162494	6.00342	3.0675	0.00822505	0.075618	-2.88705
Brinp2	-0.252124	5.1747	-3.06747	0.00822557	0.075618	-2.80461
LOC363337	0.4635	2.3764	3.06747	0.00822558	0.075618	-2.42147
RGD1311595	-0.226935	5.61328	-3.06727	0.00822882	0.075618	-2.85474
Eif4e	0.13744	6.57163	3.06719	0.00823013	0.075618	-2.91443
Tnnc1	0.372711	1.32201	3.06704	0.00823255	0.075618	-2.38035
Kdm3b	-0.152445	6.10752	-3.06582	0.00825262	0.0757597	-2.89677
Rabl2a	0.188539	4.44217	3.06478	0.00826981	0.0758627	-2.70134
Arnt	-0.220362	4.69586	-3.06458	0.00827316	0.0758627	-2.74189
Lilrb3	-0.669991	1.26729	-3.06626	0.00827974	0.0758627	-2.3829
Arcn1	0.135301	7.3796	3.06402	0.00828244	0.0758627	-2.92489
Zfp423	-0.223929	5.75291	-3.06353	0.00829049	0.0758938	-2.87486
Pdzd11	0.230098	4.71707	3.06298	0.00829957	0.0759343	-2.74855
Ube2e1	0.138119	6.25323	3.06239	0.00830949	0.0759361	-2.91149
Rpl37	0.177671	6.5387	3.06198	0.00831628	0.0759361	-2.92348
Dctd	-0.319547	2.7314	-3.06186	0.00831824	0.0759361	-2.46006
Plekhd1	-0.210607	5.82651	-3.06185	0.00831839	0.0759361	-2.88433
Dab1	-0.288409	4.43013	-3.06127	0.00832798	0.0759734	-2.70494
Mrps7	0.158335	5.71029	3.06091	0.00833402	0.0759734	-2.87665
Rpp25	0.263508	2.95572	3.06077	0.00833644	0.0759734	-2.48497
Rack1	0.129863	7.62289	3.06004	0.00834858	0.0760415	-2.9296
Chad	0.585708	1.96729	3.06149	0.00835476	0.0760554	-2.41253
RGD1305178	0.129097	5.63128	3.05901	0.00836572	0.0761034	-2.87301
St6galnac4	0.135763	5.06632	3.05863	0.00837217	0.0761034	-2.80822
Casr	-0.637834	3.93549	-3.10832	0.00837728	0.0761034	-2.59187
Wrn	-0.242648	4.90345	-3.05801	0.00838251	0.0761034	-2.78564
Coro2b	-0.145189	7.48506	-3.05736	0.00839332	0.0761034	-2.93651
LOC103693676	-0.376464	4.77538	-3.07037	0.00839499	0.0761034	-2.75739
Mrpl50	0.19428	4.53682	3.05713	0.00839717	0.0761034	-2.73129
Acan	-0.348586	4.29679	-3.0587	0.00839736	0.0761034	-2.68913
Tenm3	-0.33265	6.3857	-3.07461	0.00844048	0.0764517	-2.917
Rnf14	0.135148	8.98073	3.05403	0.00844937	0.0764898	-2.90913
Hmgcs2	-0.550248	6.25474	-3.13319	0.00846629	0.0765688	-2.86991
Mrpl44	0.150469	4.58953	3.05296	0.00846748	0.0765688	-2.7479
Trps1	-0.158748	5.81921	-3.05135	0.00849469	0.0767339	-2.90422
Sema6c	-0.241017	4.96977	-3.05133	0.00849515	0.0767339	-2.80783
Tincr	-0.403544	3.57355	-3.05071	0.00850565	0.0767862	-2.58425
Rapgef1	-0.132811	6.46691	-3.05004	0.00851699	0.0768461	-2.94413
Adgrb1	-0.182611	8.10559	-3.04954	0.00852546	0.0768799	-2.94157
Ttc7b	0.149386	6.95955	3.04828	0.00854704	0.0769267	-2.95685
Oxr1	0.206638	8.36537	3.04827	0.00854722	0.0769267	-2.93799
LOC100910708	-0.808744	1.12786	-3.06357	0.00855224	0.0769267	-2.40128
Stard3nl	0.167168	5.79179	3.04797	0.00855231	0.0769267	-2.90862
Fuca2	0.209984	5.05783	3.04786	0.00855423	0.0769267	-2.82729
Atp13a1	-0.155065	5.63947	-3.04663	0.00857525	0.0770733	-2.89729
Scmh1	-0.204369	4.86094	-3.04497	0.00860364	0.0772651	-2.8045
Rps13	0.156444	6.43101	3.04473	0.00860771	0.0772651	-2.95312
Tmem229b	0.392291	6.73319	3.08316	0.00861587	0.0772651	-2.93328
Ccdc92	0.188488	7.12128	3.0441	0.00861857	0.0772651	-2.96493
Arl4c	0.23195	5.75629	3.04376	0.00862445	0.0772651	-2.91335
Cct7	0.131989	7.75349	3.04373	0.008625	0.0772651	-2.95913
Aqp11	0.306806	3.51038	3.04322	0.00863378	0.0773013	-2.58951
Cystm1	0.148027	5.69665	3.04214	0.00865234	0.0773868	-2.91151
Pmm2	0.158826	4.92045	3.042	0.00865491	0.0773868	-2.81942
Tiam1	-0.199481	5.34063	-3.04184	0.00865757	0.0773868	-2.87434
Dpp9	-0.130927	6.35208	-3.04131	0.00866678	0.0774268	-2.95653
Fgfr1op2	0.164032	5.68453	3.04011	0.00868753	0.077555	-2.91425
Echdc1	0.153256	5.84315	3.03977	0.00869347	0.077555	-2.92861
LOC102557338	-0.285661	2.23671	-3.03955	0.00869721	0.077555	-2.46194
Trnp	0.569555	0.169376	3.03937	0.00870044	0.077555	-2.41447
Lats1	-0.226312	5.67837	-3.03897	0.00870741	0.077555	-2.91523
Ap5z1	-0.173134	4.30694	-3.03884	0.00870967	0.077555	-2.72784
Repin1	-0.160197	5.2323	-3.03835	0.00871824	0.077561	-2.86817
Map3k7cl	-0.576132	1.52943	-3.03825	0.00871985	0.077561	-2.43507
Drg1	0.172366	5.3813	3.03641	0.00875191	0.0777686	-2.88985
Iqcb1	0.13701	5.08239	3.03605	0.00875835	0.0777686	-2.85353
Nab2	0.331807	3.17348	3.03588	0.00876129	0.0777686	-2.55607
Prickle2	-0.164452	6.69761	-3.03558	0.00876656	0.0777686	-2.9781
LOC102556526	-0.45995	0.905947	-3.03555	0.00876702	0.0777686	-2.42605
Sos1	-0.189459	6.5358	-3.0341	0.00879247	0.0779519	-2.97687
Rasgrp1	0.367626	5.78295	3.06004	0.00879891	0.0779667	-2.91508
Pafah1b2	0.138964	8.15159	3.0329	0.00881351	0.0780536	-2.97268
Slc1a1	-0.232751	4.94327	-3.03197	0.00882986	0.078156	-2.84105
Rc3h2	-0.183413	6.05556	-3.0316	0.00883641	0.0781716	-2.95921
Aqr	-0.141199	5.97196	-3.03047	0.00885633	0.0783053	-2.95603
Kdm4a	-0.129704	6.0333	-3.02979	0.00886847	0.0783702	-2.96146
mrpl24	0.162686	4.8537	3.02943	0.00887484	0.078384	-2.83359
Coq9	0.171858	5.91361	3.02904	0.00888168	0.078402	-2.95459
Fkbp1b	0.264624	5.07161	3.02812	0.00889814	0.0785048	-2.86653
Abhd12	0.188551	7.881	3.0256	0.00894298	0.0788163	-2.99195
Nek7	0.219206	7.57971	3.02559	0.00894311	0.0788163	-2.99647
Rptor	-0.137678	6.63298	-3.02485	0.00895627	0.0788897	-2.99743
Lpcat1	-0.135535	5.31627	-3.02325	0.00898495	0.0790995	-2.90732
LOC103690083	-0.35649	3.62309	-3.02286	0.00899198	0.0791188	-2.6438
Psmd4	0.131975	6.68395	3.02236	0.00900095	0.079155	-3.00346
Sirpa	-0.167932	6.98244	-3.02165	0.00901378	0.0792251	-3.00806
Unc13b	-0.270353	4.07919	-3.02073	0.00903031	0.0793277	-2.72309
LOC108352689	-0.367959	0.798162	-3.02011	0.00904154	0.0793835	-2.45053
Msantd1	-0.412674	1.89184	-3.01778	0.00908362	0.0796844	-2.48324
LOC680017	-0.3926	2.0215	-3.01767	0.00908557	0.0796844	-2.48926
Tenm1	-0.366391	5.34202	-3.03626	0.00910973	0.0798487	-2.90757
Bub3	0.133781	5.36246	3.01581	0.00911939	0.0798487	-2.92719
Nes	-0.510218	1.92049	-3.01568	0.00912172	0.0798487	-2.48823
Psmg3	0.323677	4.20386	3.01556	0.00912389	0.0798487	-2.7537
Zpbp	0.409653	2.14088	3.01406	0.0091513	0.0800457	-2.50164
Uqcc2	0.233043	5.24511	3.01308	0.00916922	0.0801465	-2.91791
Rasal2	-0.160029	5.16611	-3.01289	0.00917266	0.0801465	-2.90839
Scoc	0.157695	7.6937	3.00791	0.0092642	0.0808918	-3.02888
Fbxo3	0.144902	6.84212	3.00772	0.00926786	0.0808918	-3.034
Grb10	-0.282627	6.77571	-3.0161	0.00927892	0.080945	-3.02709
Arhgef7	-0.155684	6.66945	-3.00566	0.009306	0.0811378	-3.0351
Col22a1	-0.326994	2.36482	-3.00493	0.00931951	0.0812011	-2.5315
Acvr1	-0.171624	4.50009	-3.00473	0.00932322	0.0812011	-2.8243
LOC102556004	0.264554	4.13347	3.004	0.00933675	0.0812756	-2.76395
Scn5a	-0.344387	1.95281	-3.00336	0.00934874	0.0813366	-2.51098
Mir3577	-0.368231	1.84261	-3.00253	0.00936417	0.0814051	-2.50777
LOC102550985	-0.517831	0.547133	-3.0024	0.0093666	0.0814051	-2.47725
Zfp384	-0.243281	5.28363	-3.0009	0.00939481	0.0815654	-2.94548
LOC102555474	0.414149	1.76068	3.00088	0.00939505	0.0815654	-2.50748
Fibp	0.117418	5.13438	3.00012	0.00940933	0.0816459	-2.92903
Acads	0.21541	4.6649	2.99897	0.00943101	0.0817686	-2.86198
Ndufc2	0.163282	6.80711	2.99884	0.00943349	0.0817686	-3.05064
Dcxr	0.351075	2.69667	2.99757	0.00945737	0.0819216	-2.57226
Rxfp1	-0.401187	2.37509	-2.99737	0.00946118	0.0819216	-2.54566
Fsip1	0.505579	1.39427	2.99679	0.00947213	0.0819729	-2.5025
mrpl11	0.15536	4.72111	2.9964	0.00947955	0.0819936	-2.87606
Rpl4	0.132644	8.555	2.99407	0.00952352	0.0823303	-3.03703
Camsap1	-0.142137	6.59417	-2.99308	0.00954238	0.0824496	-3.05746
Twf1	0.12602	6.15806	2.99274	0.009549	0.0824631	-3.04028
Vegfb	0.164095	6.24184	2.99241	0.00955512	0.0824723	-3.04536
Arl1	0.147967	5.87765	2.99112	0.00957987	0.0826422	-3.02461
Slc2a10	-0.666064	3.22585	-3.02395	0.00958644	0.0826552	-2.62263
Slc35c1	-0.190731	4.29425	-2.98971	0.00960676	0.0827867	-2.81813
Adssl1	0.284643	1.80352	2.98915	0.00961746	0.082835	-2.52951
LOC102548155	-0.309987	3.89597	-2.98888	0.00962268	0.0828363	-2.75149
Pafah2	-0.221243	3.67754	-2.98778	0.00964388	0.0829218	-2.71826
Akap3	0.358657	0.691941	2.98763	0.00964664	0.0829218	-2.50352
Brf1	-0.146409	5.41926	-2.98757	0.00964787	0.0829218	-2.98741
Rnf111	-0.121567	5.27831	-2.98484	0.00970059	0.0833311	-2.9762
Ccdc15	-0.281819	2.59635	-2.9832	0.00973224	0.0835589	-2.58869
Ankfy1	-0.115893	6.96321	-2.9826	0.00974398	0.0836157	-3.0831
Cox7a2l2	0.391757	2.60192	2.98132	0.00976887	0.0837175	-2.59249
LOC501110	0.341858	4.33773	2.98287	0.00977199	0.0837175	-2.83964
Pcdhb4	0.363164	2.35665	2.98113	0.00977257	0.0837175	-2.573
Fcf1	0.211499	4.33244	2.98088	0.0097774	0.0837175	-2.84134
Adss	0.142623	6.70022	2.98046	0.00978569	0.0837175	-3.08421
Arl6ip5	0.156398	5.85413	2.98038	0.00978712	0.0837175	-3.04331
Rpl27	0.149939	6.498	2.98014	0.00979176	0.0837175	-3.07961
Uqcrq	0.188112	6.32272	2.9794	0.0098064	0.0837987	-3.07407
Jagn1	0.126371	5.1646	2.97822	0.00982942	0.0839515	-2.97462
Msl1	-0.132165	7.09205	-2.9779	0.00983568	0.083961	-3.09227
Jmjd1c	-0.153927	6.66075	-2.97753	0.00984287	0.0839784	-3.08889
Zfp654	0.215903	4.7253	2.97715	0.00985034	0.0839844	-2.91284
Coprs	0.185388	5.54935	2.97697	0.00985387	0.0839844	-3.02175
Lypla2	0.147457	5.78992	2.97527	0.00988736	0.0842258	-3.04783
Apool	0.262016	3.37868	2.97498	0.00989314	0.0842311	-2.69584
Dact2	0.314654	3.84324	2.97208	0.00995048	0.0846638	-2.7743
Gpatch8	-0.123679	6.29302	-2.97187	0.00995468	0.0846638	-3.08715
Hs3st4	0.309442	4.01143	2.97162	0.00995953	0.0846638	-2.80356
Flnc	-0.291738	6.36226	-2.98157	0.00997182	0.0847241	-3.08331
Arpc3	0.152996	6.12618	2.96965	0.00999881	0.0849092	-3.08265
Tnip1	0.131248	5.76832	2.96714	0.0100489	0.0852535	-3.06154
Cish	0.246687	2.56202	2.96709	0.0100498	0.0852535	-2.61438
Dexi	0.158197	5.42415	2.96672	0.0100573	0.0852724	-3.02786
Sidt1	-0.259229	4.49337	-2.96624	0.010067	0.0852953	-2.8952
Cd93	-0.636947	3.26125	-2.99689	0.0100704	0.0852953	-2.67379
Rims1	-0.183347	6.50862	-2.9636	0.0101201	0.0856508	-3.11138
Rad21	0.114496	7.61497	2.96346	0.0101229	0.0856508	-3.11529
Mrpl38	-0.19926	5.24188	-2.96314	0.0101293	0.0856602	-3.01256
Rad51b	0.444715	1.3936	2.96167	0.010159	0.0858673	-2.56261
Kndc1	-0.270845	7.83024	-2.96612	0.0101672	0.0858918	-3.11248
Dll1	-0.232083	2.83204	-2.96091	0.0101744	0.085908	-2.65182
Ppih	0.203668	3.90261	2.95954	0.0102023	0.0860994	-2.80828
Ndst4	0.595018	3.43262	2.98698	0.010232	0.0862043	-2.71408
Leng8	-0.33206	7.53507	-2.98027	0.0102353	0.0862043	-3.11008
Hivep1	-0.18266	5.58017	-2.95787	0.0102363	0.0862043	-3.06111
Zfp637	0.121159	5.24699	2.95744	0.0102449	0.0862043	-3.02466
Nrsn1	0.239917	7.80358	2.95743	0.0102453	0.0862043	-3.12397
Ppm1m	0.189453	3.87952	2.95734	0.0102471	0.0862043	-2.80854
RGD1303003	0.152981	6.61567	2.95678	0.0102585	0.0862043	-3.1277
Ccm2	0.120636	5.54374	2.95599	0.0102746	0.0862043	-3.06141
Sfmbt2	-0.324071	2.53133	-2.95574	0.0102797	0.0862043	-2.63181
Rbpjl	-0.407822	2.62158	-2.95565	0.0102815	0.0862043	-2.63997
LOC102556092	0.197843	6.23954	2.95524	0.01029	0.0862043	-3.11632
Dock6	-0.350334	4.61716	-2.9627	0.0102914	0.0862043	-2.92999
Ano8	-0.194004	5.79948	-2.9551	0.0102929	0.0862043	-3.08674
RGD1308134	0.215085	4.40991	2.95503	0.0102944	0.0862043	-2.90302
Camsap2	-0.128771	7.67903	-2.95489	0.0102971	0.0862043	-3.13076
Mef2d	-0.115629	6.86319	-2.95479	0.0102993	0.0862043	-3.13567
Dnajb9	0.14079	5.7853	2.95413	0.0103128	0.0862623	-3.08784
Ift80	0.163074	5.75173	2.95394	0.0103168	0.0862623	-3.08517
Brox	0.118845	6.53795	2.95347	0.0103264	0.0862988	-3.13202
Arsb	-0.152424	6.4909	-2.95312	0.0103335	0.0863136	-3.13096
LOC102548914	0.453169	0.372317	2.95204	0.0103559	0.0864562	-2.55912
Bicd1	-0.148463	5.3118	-2.95168	0.0103632	0.0864727	-3.04322
LOC108349032	-0.403676	1.88712	-2.95095	0.0103783	0.0865547	-2.59927
Idh3a	0.140511	8.27521	2.95042	0.0103893	0.0866025	-3.128
Rit1	0.133293	5.41234	2.94893	0.0104201	0.0868137	-3.0605
Als2	-0.142047	6.0764	-2.94865	0.0104259	0.0868137	-3.11967
Myt1	-0.307381	4.32852	-2.94843	0.0104306	0.0868137	-2.90056
Phb2	0.130234	6.20257	2.94411	0.0105206	0.0875176	-3.1358
Ik	0.124039	6.93401	2.94344	0.0105347	0.0875906	-3.15804
Gabarapl1	0.19242	9.07301	2.94304	0.0105431	0.087611	-3.11882
Acp1	0.187938	4.81512	2.94281	0.0105479	0.087611	-2.99195
R3hdm1	-0.122367	6.0768	-2.9423	0.0105586	0.0876552	-3.1319
Zdbf2	-0.296418	5.80942	-2.95017	0.0105883	0.0877393	-3.10705
Vcan	-0.21739	6.13988	-2.94086	0.0105889	0.0877393	-3.1381
Actr6	0.176172	5.04464	2.94081	0.0105899	0.0877393	-3.02934
Rab5b	0.11292	8.39316	2.9408	0.0105902	0.0877393	-3.1434
Sf3b6	0.197911	4.34265	2.93838	0.0106413	0.088097	-2.92295
Fbxo9	0.198649	6.98045	2.93825	0.0106442	0.088097	-3.16803
Asah1	0.23994	6.65772	2.93788	0.010652	0.0881168	-3.1646
LOC102551038	-0.238034	2.9162	-2.93747	0.0106607	0.0881438	-2.70338
Tmem223	0.252926	4.38358	2.93647	0.0106819	0.0881966	-2.93319
Mrps30	0.136979	4.92773	2.93647	0.0106819	0.0881966	-3.02104
Kcnmb1	-0.588809	0.279914	-2.93641	0.0106833	0.0881966	-2.58408
Endou	0.347094	1.7806	2.93483	0.0107168	0.0884287	-2.62266
Serinc1	0.162422	9.89103	2.9343	0.0107282	0.0884402	-3.10646
Higd1a	0.170901	6.17871	2.93393	0.0107361	0.0884402	-3.15383
Thada	-0.196264	4.97657	-2.93382	0.0107384	0.0884402	-3.03256
Sap18	0.122574	5.3213	2.93353	0.0107446	0.0884402	-3.07915
Ltbp4	-0.312428	5.14413	-2.93964	0.0107453	0.0884402	-3.05076
Syf2	0.145858	5.81372	2.93194	0.0107788	0.0885877	-3.13258
Pced1a	-0.146967	4.7917	-2.93179	0.0107819	0.0885877	-3.00906
Fam124a	-0.248267	3.95717	-2.93177	0.0107823	0.0885877	-2.86862
LOC100360205	-0.228004	4.77405	-2.93165	0.010785	0.0885877	-3.00607
Emcn	-0.607546	2.74453	-2.94551	0.0107963	0.0886362	-2.68658
Aip	0.153731	5.73494	2.929	0.010842	0.0889667	-3.13125
LOC103693540	0.288835	2.40691	2.92851	0.0108525	0.089008	-2.66971
Lnpep	-0.290027	2.61327	-2.92787	0.0108663	0.0890633	-2.6888
Epdr1	0.21216	7.12066	2.92769	0.0108702	0.0890633	-3.18824
Slc12a5	-0.205384	9.03894	-2.92694	0.0108865	0.0891525	-3.1506
Lrrc55	-0.310984	6.02181	-2.94032	0.0109016	0.0892312	-3.14731
Taf11	0.18606	4.01851	2.92576	0.010912	0.0892719	-2.89102
Frrs1l	-0.238051	5.94104	-2.92534	0.0109211	0.0893014	-3.15441
Pigx	0.208358	4.48626	2.9247	0.0109352	0.0893714	-2.97286
Itsn1	-0.14311	7.16668	-2.92281	0.0109763	0.0896626	-3.19743
Dab2ip	-0.16654	6.71439	-2.92245	0.0109841	0.0896811	-3.1953
Mzt1	0.17248	4.83057	2.92221	0.0109895	0.0896811	-3.03334
[truncated: 14,314 more rows]

## Sheet: DEGs_up
GeneID	logFC	AveExpr	t	P.Value	adj.P.Val	B
Slc17a7	1.46549	5.83861	4.15135	0.00161164	0.0319061	-1.1327
LOC108351942	1.39973	0.802224	4.78898	0.000311416	0.0140335	0.355794
Sdc1	1.35428	3.16933	4.65562	0.000505292	0.0171143	0.125724
Myh8	1.30305	0.85557	5.84383	4.05877e-05	0.00514989	1.97449
Clec2d	1.29825	0.653722	3.89294	0.00178427	0.0337666	-1.07965
Cldn4	1.2747	0.435735	6.40112	1.53079e-05	0.00361909	2.61144
LOC310926	1.12552	0.584448	8.63745	4.92286e-07	0.000751082	4.98926
Trnk	1.10356	4.91862	6.46253	2.23834e-05	0.00419507	3.04037
Myom3	0.989433	3.04124	6.13047	2.46735e-05	0.00426836	2.7942
Rab37	0.952848	4.42969	4.25341	0.00106286	0.0251031	-0.653306
Slc25a48	0.949987	1.29145	4.85436	0.00024388	0.0124784	0.60512
Trnd	0.946772	3.65464	5.56351	7.53013e-05	0.00718426	1.8535
Neurod6	0.937884	2.8358	3.52731	0.00374961	0.0494481	-1.71466
Lamb3	0.913336	2.47794	3.57991	0.00325194	0.0454263	-1.57769
Prg2	0.884492	0.256365	4.24154	0.00079409	0.0219559	-0.454782
Chd1l	0.881295	3.20105	7.28635	3.63642e-06	0.00174473	4.49481
LOC102555453	0.88025	3.57867	7.42643	2.92444e-06	0.00172349	4.77904
Trng	0.84553	3.98272	6.20277	2.26302e-05	0.00419507	2.97649
Spp1	0.844462	7.15835	4.36558	0.000944162	0.0235978	-0.696334
Trnr	0.822808	3.13367	3.98086	0.00146364	0.0302233	-0.884422
Trnw	0.822608	3.7513	5.38759	9.81888e-05	0.00819944	1.6031
Snhg4	0.818633	1.97617	5.03365	0.000174077	0.0104401	0.959478
Trni	0.815902	3.34049	4.04833	0.00129811	0.0278999	-0.783331
LOC108352908	0.809674	0.265763	3.70724	0.00228577	0.0378941	-1.31375
Nnmt	0.804768	1.16586	4.72033	0.000314603	0.0140779	0.382262
LOC108349532	0.803971	2.20872	5.53235	6.96458e-05	0.00688876	1.76829
Trim54	0.802346	0.900128	4.81047	0.000265023	0.0130288	0.495457
Cpne9	0.771335	4.97508	4.54804	0.000569389	0.0182126	-0.125125
Trnl1	0.771009	6.07369	5.36141	0.000134417	0.00937068	1.2247
Bpifb4	0.705321	1.1014	3.87702	0.00163011	0.0320858	-0.999615
Arhgef38	0.702664	1.63416	4.73604	0.000305318	0.0139649	0.449557
Wnt9b	0.677821	0.482055	4.57562	0.000415119	0.0156033	0.0881974
LOC103692946	0.671347	2.75439	3.78081	0.00200247	0.0359815	-1.16935
Cd86	0.670623	1.18564	4.05139	0.0011541	0.0260782	-0.704173
Trnm	0.665148	7.73839	5.08531	0.000205408	0.0115546	0.772957
Arl16	0.657295	4.83345	9.54012	1.45578e-07	0.000296851	7.73335
Cabp7	0.654917	5.71275	3.59252	0.00358831	0.0482573	-1.99029
Otos	0.649674	0.375765	4.65532	0.000356224	0.0147865	0.199469
Kcns2	0.640592	1.98613	3.54822	0.00314092	0.0446293	-1.55507
LOC689081	0.639874	0.40761	4.06852	0.00111575	0.0257443	-0.719419
Fmo5	0.627128	1.64227	4.71401	0.000318421	0.0140869	0.414791
Efhd2	0.623972	7.20793	5.84289	4.71691e-05	0.00544562	2.20877
LOC102551693	0.604866	3.08204	4.7297	0.000309028	0.0140033	0.526033
Sv2b	0.589466	6.82647	4.72327	0.000380658	0.0151096	0.147519
LOC100363502	0.588687	4.03512	4.19334	0.000913968	0.0234285	-0.528283
Ngf	0.573998	0.486807	3.96826	0.00136028	0.0287811	-0.876888
Spn	0.571227	1.76137	4.43626	0.000543349	0.0177446	-0.0328351
LOC102553814	0.570087	0.331133	4.06517	0.00112314	0.0258054	-0.729774
Ccdc122	0.568981	1.73754	4.0755	0.00110048	0.0256458	-0.642271
LOC100912002	0.559995	3.34415	5.69985	5.1585e-05	0.00568585	2.17201
P2rx3	0.547728	1.46219	3.91431	0.00151379	0.030763	-0.925034
Cryz	0.540376	4.02832	6.9239	6.46735e-06	0.00229352	4.14086
LOC690155	0.534883	3.45573	3.82177	0.00182694	0.0342561	-1.13393
Rbm11	0.511998	3.37693	3.71225	0.00226305	0.037825	-1.32727
LOC103690947	0.504472	3.21907	3.92439	0.00148382	0.030409	-0.922457
Tbx4	0.497655	0.294197	3.56317	0.0030484	0.0440465	-1.549
RGD1309108	0.484223	2.5377	4.47738	0.000501759	0.0170993	0.074367
Irf6	0.483294	2.44816	3.75168	0.00209189	0.0366012	-1.20214
Dpm3	0.469612	1.5105	3.53338	0.00323561	0.0453458	-1.57835
Crh	0.469106	1.71368	3.5107	0.00338595	0.0465333	-1.6182
mt-Rnr2	0.465548	11.0075	4.51306	0.000480766	0.016877	-0.0375659
LOC103694121	0.463183	1.06605	3.60258	0.0028173	0.0425149	-1.46395
Hrasls	0.461715	3.38738	3.61595	0.00274295	0.0419754	-1.50761
LOC108349107	0.45158	1.46671	3.55733	0.00308418	0.0442499	-1.53711
Glt1d1	0.445645	5.17702	4.24243	0.000813473	0.0221063	-0.549265
Hs3st2	0.444134	3.23927	3.64128	0.00260759	0.0406282	-1.44635
mt-Rnr1	0.436574	10.6663	4.90471	0.000221759	0.0120593	0.708855
Kcnip3	0.42259	5.18459	4.87332	0.000235296	0.0123421	0.662044
Cplx2	0.418193	6.75152	4.05756	0.00121234	0.0267616	-1.02738
Prkg2	0.415164	3.19231	3.88993	0.00158884	0.0316862	-0.984141
Bin2	0.408611	3.94392	3.89426	0.00157526	0.0315303	-1.04835
Hspa2	0.4065	4.8272	4.37465	0.000612418	0.0190293	-0.240955
Mettl23	0.404832	2.34452	3.76177	0.00205024	0.036295	-1.18232
Plekhb1	0.39456	9.20746	4.12934	0.00101135	0.0245142	-0.823634
E2f2	0.391247	2.49727	4.86234	0.00024023	0.0123624	0.725261
Cst3	0.384455	11.3023	4.06989	0.00111272	0.0257412	-0.857221
Churc1	0.375185	3.52741	3.63327	0.00264966	0.0411276	-1.4908
Cenpk	0.374965	1.59754	3.81554	0.00184206	0.0344846	-1.09089
LOC680491	0.371299	1.86549	3.72774	0.00219419	0.0372464	-1.24011
Lcmt2	0.370149	2.16317	3.64186	0.00260457	0.0406198	-1.3922
RGD1561113	0.369298	5.38537	6.03491	2.86255e-05	0.0045164	2.72013
Rabl3	0.369084	3.51801	3.98427	0.00131784	0.0282124	-0.835331
Glrx5	0.360877	5.66829	6.72842	8.88705e-06	0.00268572	3.85822
Plvap	0.353665	4.07624	3.68941	0.00236859	0.0385232	-1.45424
Anxa4	0.352743	5.18745	4.04444	0.00117005	0.0262759	-0.913391
Gls	0.352661	8.26446	4.26549	0.000757739	0.0216773	-0.567034
Gemin7	0.350527	2.9678	3.71467	0.00225213	0.0378247	-1.29072
Spint1	0.345888	3.09775	3.48397	0.00357212	0.0481587	-1.72419
Rps25	0.345541	6.79558	6.25993	1.94431e-05	0.00386799	3.0629
Glrx	0.345327	5.55555	6.33676	1.7065e-05	0.00363761	3.2212
Glrx3	0.343329	6.87642	6.65033	1.01046e-05	0.00277395	3.71135
Gpx4	0.338771	8.20023	5.8503	3.95223e-05	0.00507659	2.36528
Ndufb9	0.338262	7.1516	6.64448	1.02027e-05	0.00277395	3.70147
Lgals1	0.337892	5.54386	4.67885	0.000340541	0.0144644	0.268401
Ubald2	0.337462	5.15352	5.40806	8.72391e-05	0.00763327	1.63873
Irx2	0.335775	4.11218	3.64595	0.00258333	0.040482	-1.54206
Lyplal1	0.334728	3.65079	3.47375	0.00364597	0.0485921	-1.8053
LOC102554622	0.334225	6.27569	4.06697	0.00111916	0.0257502	-0.951498
Pcp4	0.333689	7.33418	5.73831	4.81745e-05	0.00545743	2.16074
Gsto1	0.330138	6.15069	5.39059	9.00598e-05	0.00780187	1.55275
Faap24	0.326765	1.45188	3.54996	0.00313001	0.0445938	-1.54987
Pir	0.325558	4.37062	4.76256	0.000290281	0.0136882	0.52949
RGD1306739	0.324936	4.51339	4.25287	0.000776668	0.0218167	-0.437274
Cox7b	0.32322	7.20261	5.42177	8.5089e-05	0.00754379	1.59393
Ndufa12	0.320039	5.75368	4.19829	0.000864332	0.0228523	-0.666781
Rpl17	0.319621	6.85165	3.70266	0.00232026	0.0382327	-1.68307
Fkbp3	0.316802	7.31577	5.93536	3.40438e-05	0.00472905	2.50595
Tifa	0.315728	3.06849	3.69697	0.00233309	0.0383283	-1.33001
Pnpo	0.314496	6.70869	5.21532	0.000124213	0.00912104	1.21917
Lactb2	0.310917	4.86035	6.06853	2.70058e-05	0.00431908	2.79984
Rps20	0.310265	6.48514	7.42976	2.90942e-06	0.00172349	4.94176
Khk	0.310006	3.26285	3.60294	0.00281524	0.0425149	-1.51985
Uqcr10	0.308019	6.35179	5.43041	8.37628e-05	0.00750782	1.61841
Psmb1	0.306456	7.19712	5.1027	0.000153042	0.009829	1.00939
Sco1	0.305445	4.08279	5.00617	0.000183264	0.0107154	0.992241
Rassf4	0.303372	5.57697	3.6448	0.00258928	0.0404975	-1.72964
Adpgk	0.302993	6.6401	4.48999	0.000489666	0.0170113	-0.143892
Cox7a2	0.302965	6.72272	5.17471	0.000133898	0.00937068	1.14421
Gltscr2	0.299442	6.08178	5.74741	4.74026e-05	0.00544562	2.19221
Ufm1	0.298663	5.09193	3.56904	0.00301281	0.0438061	-1.8251
Usmg5	0.298177	6.5226	5.55458	6.69108e-05	0.00685351	1.83783
Gbe1	0.298113	5.27472	4.46346	0.000515461	0.0173155	-0.117908
Shb	0.296087	4.0877	4.35231	0.000639632	0.0195399	-0.204139
Zfp952	0.295458	3.4918	3.5979	0.00284377	0.0427167	-1.55322
Dynlt3	0.294806	7.2772	5.24387	0.000117843	0.00894124	1.26992
Nfatc2	0.294758	5.73841	4.29329	0.000717658	0.020943	-0.482366
Cox6c	0.294745	7.34116	5.82025	4.16714e-05	0.00514989	2.305
Macrod2	0.294227	4.59286	3.7202	0.00222742	0.0375371	-1.46706
Eef1a1	0.292912	10.4082	5.14372	0.000141812	0.00952478	1.14315
Ndufa6	0.292491	6.34766	4.7155	0.000317516	0.0140869	0.293823
Sucla2	0.292443	7.85804	6.21529	2.09821e-05	0.00402684	2.99027
Amacr	0.291629	4.45159	3.45611	0.00377707	0.0496497	-1.95488
Fam103a1	0.290311	4.75314	5.54167	6.84855e-05	0.00686117	1.90103
Ostc	0.28987	5.45107	5.99761	3.05414e-05	0.00461317	2.65315
Atp6v1d	0.288836	7.60704	6.85683	7.20835e-06	0.00240513	4.04666
Mpc1	0.288721	7.13406	5.32351	0.000101804	0.00834537	1.4151
Mrps18c	0.287053	4.18183	4.60946	0.000388976	0.0151526	0.264064
Ddx25	0.286972	5.40387	4.43566	0.000543984	0.0177446	-0.18247
Msrb1	0.286222	4.92763	4.92848	0.000212046	0.0117657	0.78516
Ndufa4	0.284449	7.70824	6.31506	1.77041e-05	0.00365578	3.15765
LOC100912557	0.284411	5.42924	5.26754	0.000112818	0.00879576	1.36693
Svop	0.283732	6.5888	3.86718	0.00166228	0.0325923	-1.35231
Med31	0.283419	4.1252	3.46035	0.00374515	0.0494481	-1.89805
Bnip3	0.283363	7.11	4.65889	0.000353799	0.0147487	0.175252
L2hgdh	0.283201	3.77428	3.51103	0.00338367	0.0465333	-1.75182
Isca1	0.28193	7.43037	5.4064	8.75021e-05	0.00763327	1.56723
Hdhd2	0.280117	5.89807	5.19412	0.000129173	0.00928283	1.20542
Tstd3	0.279798	5.49548	3.61901	0.00272623	0.0418372	-1.77239
Rps3a	0.278752	7.56666	5.11425	0.000149792	0.00970521	1.03318
Ndufv2	0.278594	7.43133	5.18162	0.000132194	0.00933543	1.15645
Rps15a	0.278455	6.67419	6.72819	8.8904e-06	0.00268572	3.83913
Cd59	0.278441	8.37298	4.6627	0.000351226	0.0147487	0.197274
Emc4	0.277844	6.49245	4.8291	0.000255829	0.0128807	0.504251
Igbp1	0.277582	5.04528	5.12285	0.000147415	0.00970521	1.13159
Ndufa2	0.277469	5.72284	5.38857	9.03913e-05	0.00780187	1.56825
Uchl5	0.276205	4.93517	4.03823	0.00118449	0.0263819	-0.89781
Auh	0.275691	6.89546	4.46093	0.000517991	0.0173155	-0.203016
Atp6v1b2	0.272927	9.1513	4.15765	0.000936149	0.0235873	-0.754482
Itgb3bp	0.271324	3.0384	3.59725	0.00284747	0.042733	-1.51092
Ttc1	0.271241	6.14628	4.45836	0.000520574	0.0173309	-0.18889
RGD1359158	0.270806	3.64623	3.7095	0.00227548	0.0378941	-1.36195
Napg	0.27066	7.23302	4.48513	0.000494291	0.0170113	-0.156625
Uqcrh	0.270322	7.11146	5.17884	0.000132878	0.00934326	1.14979
Rplp1	0.270274	6.9015	4.50501	0.000475656	0.0168263	-0.1184
Mterf4	0.26974	3.543	4.16339	0.000925647	0.0235688	-0.506208
2015-09-01	0.267469	7.70819	5.70279	5.13152e-05	0.00568585	2.10052
Habp4	0.266437	7.40889	4.07558	0.00110031	0.0256458	-0.94846
Rpl5	0.266327	7.8103	6.10608	2.53102e-05	0.00426836	2.80375
Atp5j2	0.265938	7.05382	5.44379	8.17514e-05	0.00740895	1.63346
Pink1	0.26515	7.39988	4.05971	0.0011353	0.0258969	-0.97949
Atp5l	0.26501	7.32927	5.43233	8.34713e-05	0.00750782	1.61353
Atp6v1e1	0.264114	8.16334	5.11164	0.000150519	0.00970521	1.0355
Nifk	0.262436	4.86051	4.51686	0.0004649	0.0165587	0.0236364
Srp14	0.261794	6.3873	5.88044	3.74822e-05	0.00493103	2.41656
Tmem9	0.261584	5.78341	4.57999	0.000411647	0.0155277	0.063674
RGD1565641	0.260874	3.96308	3.92526	0.00148126	0.030409	-0.99292
Atp6v1h	0.260855	7.33447	4.52151	0.00046074	0.0165552	-0.0862187
Pgp	0.25992	5.89492	5.29587	0.000107095	0.0086941	1.39136
Atp5g1	0.25986	6.68563	4.63456	0.000370684	0.0151096	0.131645
Anxa6	0.25896	7.75025	4.04009	0.00118014	0.0263721	-1.0138
Erlec1	0.25896	6.81798	5.26204	0.000113965	0.00879576	1.30361
Fopnl	0.258636	5.1382	3.8319	0.00178305	0.0337666	-1.32036
Dnaja4	0.257489	6.75971	3.723	0.00221502	0.0374854	-1.63822
Dynlrb1	0.257478	7.34733	5.15442	0.000139025	0.00950855	1.1057
Ndufc1	0.257352	5.63555	5.35113	9.67866e-05	0.00818165	1.50542
Psmb6	0.256721	6.50342	6.00565	3.01175e-05	0.00459165	2.63155
Nit1	0.255636	5.66609	4.4805	0.000498733	0.0170921	-0.117945
Rps14	0.254796	6.84771	4.58991	0.000403868	0.0153932	0.0444759
Fh	0.254738	6.51928	4.81355	0.000263483	0.0130288	0.474225
Ndufb6	0.253362	5.86877	5.07002	0.000162649	0.0101039	0.978359
Rpl36a	0.253312	5.79582	4.69946	0.000327386	0.0143566	0.289507
Fis1	0.253009	7.02459	4.49392	0.000485963	0.0169754	-0.140201
Fabp3	0.252951	4.52319	3.74348	0.00212636	0.0368623	-1.41295
Atp5o	0.252631	7.65747	4.82111	0.000259733	0.0129952	0.486432
Fundc1	0.252513	5.75503	5.67374	5.40418e-05	0.00589606	2.07555
Ndufa5	0.252434	6.3944	4.8114	0.000264558	0.0130288	0.473489
Rps27a	0.252048	7.63636	5.92834	3.44644e-05	0.00472905	2.49571
RGD1305587	0.25166	4.36962	4.29438	0.000716131	0.0209359	-0.342854
Fabp5	0.251626	6.33728	3.98005	0.00132889	0.0283533	-1.12386
Ssr4	0.251486	5.16165	3.70741	0.00228499	0.0378941	-1.56486
Ccndbp1	0.250897	5.60367	4.26554	0.000757662	0.0216773	-0.525808
Scfd1	0.249348	5.59038	4.51157	0.000469667	0.0166558	-0.053034
Pop4	0.249319	4.7467	4.93681	0.000208747	0.011662	0.816083
Crbn	0.248097	6.70257	4.10912	0.00102993	0.0247805	-0.882068
Rnf7	0.247851	3.80066	3.99589	0.00128788	0.0278267	-0.841665
Psmd6	0.24781	6.81481	5.19849	0.000128134	0.00924886	1.18694
Psmb4	0.247643	6.64134	5.05443	0.000167449	0.0102243	0.922704
Bloc1s2	0.247109	5.00544	3.73433	0.00216553	0.0371664	-1.49408
Ptpmt1	0.246655	5.08585	4.43695	0.000542626	0.0177446	-0.150645
LOC301124	0.246359	6.41955	5.2291	0.000121093	0.00899921	1.24987
Rpp14	0.245909	4.76414	4.48522	0.000494201	0.0170113	-0.0260789
Scand1	0.245395	5.3391	4.20796	0.000848096	0.0226062	-0.613646
Sdf2	0.244451	5.94624	3.74133	0.00213551	0.0369814	-1.57046
Polr2g	0.242542	5.06314	4.78084	0.000280364	0.0134197	0.499296
Mrpl48	0.242337	5.91505	4.42243	0.000558122	0.0179719	-0.245788
Thoc7	0.241851	5.70808	5.52367	7.07453e-05	0.00691058	1.81142
Esd	0.241545	5.64314	4.01851	0.00123154	0.0270392	-1.00731
Rps3	0.24152	7.53592	4.68924	0.000333843	0.0144084	0.235607
Idh3B	0.24143	7.46614	4.15742	0.000936564	0.0235873	-0.788535
Cox14	0.241245	5.19705	3.64247	0.00260135	0.0406085	-1.69524
Rpl26	0.240633	7.4782	5.36498	9.43671e-05	0.00805974	1.49237
Arl6ip4	0.239743	5.52383	3.8376	0.00176296	0.0335724	-1.34905
Uqcrfs1	0.239561	7.16147	4.58142	0.000410517	0.0155277	0.0275102
Psma2	0.238554	6.4549	5.82383	4.1409e-05	0.00514989	2.31609
Apex1	0.2378	5.51987	4.00205	0.00127228	0.027636	-1.02873
Trmt6	0.23745	3.91991	3.68969	0.00236725	0.0385232	-1.43347
Ube2n	0.237078	6.1325	4.11439	0.00101931	0.0245976	-0.853089
Slbp	0.236681	5.15271	3.91415	0.00151429	0.030763	-1.1626
Cops5	0.236589	6.20391	4.15553	0.000940053	0.0235907	-0.776517
Prdx5	0.236575	7.12897	4.70006	0.000327012	0.0143566	0.25349
Rps7	0.236574	7.53083	4.62082	0.000380583	0.0151096	0.105327
Ublcp1	0.236468	6.80484	4.68311	0.000337779	0.0144246	0.222438
Tbca	0.236456	5.67813	5.27642	0.00011099	0.00874674	1.36744
R3hcc1	0.23643	5.7114	4.15229	0.000946053	0.0235978	-0.753107
Mpdu1	0.236296	5.9332	5.24656	0.000117259	0.00893856	1.29954
Slc38a10	0.236288	6.02175	5.06674	0.000163646	0.0101039	0.964712
Psmc6	0.235955	6.59225	4.61854	0.000382254	0.0151096	0.10274
Calm2	0.235874	8.5745	4.30515	0.000701233	0.0206857	-0.483718
Glo1	0.234904	6.68258	5.11946	0.000148347	0.00970521	1.04259
Hspe1	0.234616	5.5679	4.56177	0.000426335	0.0159149	0.0441912
Phospho2	0.234167	4.83774	3.73096	0.00218013	0.0371664	-1.4795
Pdcl	0.234146	4.58825	5.06312	0.000164755	0.0101039	1.05945
Pithd1	0.233541	6.87931	3.88881	0.00159238	0.0316862	-1.31464
Rpl3	0.233063	8.4101	5.22789	0.000121365	0.00899921	1.25355
Cript	0.232872	5.8407	4.81957	0.000260494	0.0129952	0.513068
Ndufa7	0.232689	5.60802	4.62467	0.000377783	0.0151096	0.16058
Thnsl2	0.232559	4.0039	3.64509	0.00258779	0.0404975	-1.5294
Cox7c	0.232348	6.89925	3.8978	0.00156422	0.0313863	-1.29719
Arl6ip1	0.231886	8.20559	5.20306	0.000127057	0.00924092	1.20461
Esrra	0.23154	6.17263	4.25884	0.000767657	0.0218167	-0.574785
Psmc2	0.231248	7.24778	4.81725	0.00026164	0.0130126	0.475747
Atp5c1	0.23068	7.89242	5.18395	0.000131628	0.00933543	1.1652
Cnih1	0.230629	6.37225	4.29852	0.000710374	0.0208613	-0.506052
Pfdn1	0.230458	6.14527	5.18884	0.000130442	0.00929215	1.18468
Trmt10c	0.229519	4.34368	4.16706	0.000918984	0.0234607	-0.580634
Optn	0.229488	7.09219	5.41465	8.61984e-05	0.00760084	1.58066
Ppia	0.229082	9.37234	5.27694	0.000110884	0.00874674	1.36234
Vps50	0.228788	5.15295	3.74452	0.00212196	0.036855	-1.49189
Cyc1	0.227941	7.52044	5.5321	6.96773e-05	0.00688876	1.79461
Atp6v0b	0.227647	6.26666	4.25195	0.000778075	0.0218167	-0.592185
Txn1	0.227564	5.68688	4.08097	0.00108867	0.025506	-0.889569
Gstp1	0.227558	7.12088	4.61672	0.000383593	0.0151149	0.0948091
Bcap31	0.226494	6.84073	4.68713	0.000335191	0.0144084	0.229736
Tmem5	0.226462	4.7448	3.90709	0.00153564	0.0310421	-1.12748
Atp5h	0.226318	7.35965	4.68169	0.000338698	0.0144261	0.219705
Mrpl12	0.226151	5.72327	4.5431	0.000441953	0.0161623	-0.00269266
Pcmt1	0.225558	7.72098	3.69099	0.00236113	0.0385061	-1.69752
Pole3	0.225551	5.75492	5.23469	0.000119852	0.00898398	1.28702
Atp6v1f	0.225338	6.67272	5.14883	0.000140475	0.00950855	1.09698
Atp5b	0.224807	10.436	4.85407	0.000244015	0.0124784	0.608541
Mrpl16	0.224769	4.40535	3.79746	0.00190957	0.0351192	-1.29337
Gapdh	0.224759	11.0402	4.51816	0.000463735	0.0165587	-0.00695171
Emc2	0.224604	6.1004	4.58058	0.000411179	0.0155277	0.0469013
Psmb7	0.224564	7.21622	4.48705	0.000492456	0.0170113	-0.153086
Vps41	0.224517	8.2475	4.57934	0.000412156	0.0155277	0.0360753
Stx8	0.224356	4.45149	3.73674	0.00215512	0.0371664	-1.41615
Rpl19	0.224019	7.93454	5.45586	7.99801e-05	0.00731267	1.66132
Cox6a1	0.22327	8.12132	4.44703	0.000532124	0.0175011	-0.219625
Cox4i1	0.22319	8.757	4.21227	0.000840961	0.0225116	-0.659
Mrps15	0.223144	5.52729	4.08861	0.00107239	0.0252438	-0.861531
Ccnc	0.222382	5.77075	3.91634	0.00150771	0.030763	-1.21634
Rpl31	0.222031	7.20309	4.53057	0.000452757	0.0164129	-0.0696677
Med20	0.221943	4.92393	3.73774	0.00215083	0.0371664	-1.47746
Rpl7	0.221886	7.69139	4.8309	0.000254955	0.0128764	0.505246
Mtrf1	0.221794	4.14874	3.54522	0.00315986	0.0446293	-1.74003
Skp1	0.2216	9.01397	5.29541	0.000107187	0.0086941	1.38845
Ccnh	0.221056	4.32737	4.29805	0.000711022	0.0208613	-0.331352
Trappc1	0.220935	5.91745	5.23464	0.000119863	0.00898398	1.27847
Psmd14	0.220789	6.13894	5.12598	0.00014656	0.00970521	1.06918
Rpl18a	0.220579	7.29983	4.71566	0.000317418	0.0140869	0.28382
Idh1	0.219897	6.6256	4.96365	0.000198477	0.0113208	0.753738
Mrpl17	0.219821	6.45181	4.6225	0.000379361	0.0151096	0.113648
Tusc2	0.219775	6.11216	4.04255	0.00117442	0.0262804	-0.991939
Pin1	0.219682	6.42357	3.88654	0.00159958	0.0317468	-1.30988
Tpd52	0.219626	7.13893	3.83845	0.00176	0.0335724	-1.4139
Tmem65	0.219045	6.3643	3.79099	0.00193433	0.0354547	-1.49486
Mrpl35	0.217604	4.81481	3.67028	0.00246082	0.0392025	-1.59398
Tbrg4	0.217566	4.93869	3.49428	0.00349907	0.047456	-1.95114
Atp1b3	0.217456	7.38746	4.8341	0.000253416	0.0128671	0.508394
Prdx1	0.217305	7.49251	3.99743	0.00128396	0.0277789	-1.10021
Uqcrb	0.216861	6.30579	4.37943	0.000606747	0.0189468	-0.347462
Yae1d1	0.216505	5.13211	5.09226	0.000156045	0.00990002	1.06873
Strap	0.2165	6.10407	4.61069	0.000388056	0.0151526	0.104089
Mrpl20	0.21637	5.30884	4.26479	0.000758766	0.0216773	-0.501549
Map1lc3a	0.216181	7.23572	3.76066	0.0020548	0.0363163	-1.56598
Rpl21	0.21595	7.97158	4.87897	0.000232796	0.0122964	0.599073
Slc25a4	0.215791	9.43252	4.1356	0.000977621	0.0239458	-0.789268
Btf3	0.215432	6.9253	4.32532	0.000674175	0.0202166	-0.464839
Rpl12	0.21539	6.81827	5.15623	0.000138561	0.00950855	1.10895
Rpl9	0.215353	7.48202	4.86887	0.00023728	0.0123483	0.574629
Snx25	0.21528	5.84099	4.39155	0.00059262	0.018627	-0.300599
Cfl2	0.215257	7.09908	4.46147	0.000517445	0.0173155	-0.202595
Faf1	0.215173	5.43296	4.16314	0.000926106	0.0235688	-0.708943
Npm1	0.214822	7.33308	5.59918	6.1756e-05	0.00658448	1.91346
Ppif	0.214162	4.66214	3.97977	0.00132963	0.0283533	-0.977277
Rps16	0.21398	7.99327	4.18743	0.000882962	0.023143	-0.723438
Ndufa8	0.213878	7.4546	3.91465	0.00151277	0.030763	-1.26247
B3gat3	0.213587	7.18465	4.09929	0.00105008	0.0249785	-0.903832
Cct2	0.21302	7.61906	4.55398	0.000432775	0.0160252	-0.0214362
Rpl10a	0.212927	6.53139	4.28409	0.000730684	0.0212093	-0.538781
Sdhd	0.212717	6.82185	4.65799	0.00035441	0.0147487	0.174441
Dctn3	0.21253	5.79865	4.80355	0.000268526	0.0130819	0.48539
Zmat2	0.212311	6.26511	4.60436	0.000392806	0.0151845	0.0852332
Got2	0.212227	8.3346	4.46114	0.000517774	0.0173155	-0.188534
Gyg1	0.212022	5.68591	3.75512	0.00207758	0.0365605	-1.5243
Uqcrc1	0.211364	7.98745	4.42203	0.000558557	0.0179719	-0.269891
Mob2	0.211294	4.76103	3.73494	0.00216291	0.0371664	-1.46183
Mkks	0.211013	5.66632	4.47694	0.000502179	0.0170993	-0.124987
Ndufb8	0.210394	7.52226	4.54885	0.000437077	0.0160252	-0.0322709
Taf9	0.209595	5.25864	4.29462	0.000715799	0.0209359	-0.439565
Cacybp	0.209584	7.01884	3.92777	0.00147393	0.0303643	-1.23908
Adk	0.209418	6.34141	3.83925	0.00175717	0.0335724	-1.39947
Sirt3	0.209326	5.61037	3.57921	0.00295212	0.0434797	-1.86121
Pon2	0.209184	7.07577	4.52858	0.0004545	0.0164184	-0.0738231
Rps18	0.209174	6.53596	4.62257	0.00037931	0.0151096	0.111581
Creb3	0.208514	6.0953	4.62353	0.000378612	0.0151096	0.128901
Commd3	0.208453	6.02147	3.49379	0.00350254	0.047456	-2.05967
Rps24	0.208433	7.3043	4.16008	0.000931692	0.0235873	-0.784791
Rabggtb	0.208272	6.34644	4.23308	0.000807362	0.0220981	-0.631914
Rpl11	0.207485	7.01168	4.34513	0.000648639	0.0196678	-0.426833
Psmc1	0.207387	7.70982	4.12528	0.000997675	0.0242912	-0.848321
Snrpe	0.207294	4.36182	3.7897	0.0019393	0.0355059	-1.30241
Tpt1	0.206496	9.23772	3.66582	0.00248282	0.0393607	-1.71097
Ss18l2	0.205907	5.04677	3.53251	0.00324127	0.0453861	-1.89101
RGD1560212	0.205109	5.90241	3.83361	0.00177702	0.0337626	-1.3873
Paip2b	0.204818	6.35978	4.86461	0.0002392	0.0123483	0.574521
Nans	0.204599	5.54359	4.02204	0.00122299	0.0268877	-0.992187
Cox5b	0.204341	7.52009	3.6606	0.00250885	0.0396579	-1.75966
Atp5e	0.204161	6.65176	3.57407	0.00298261	0.0436371	-1.92855
Rpl24	0.204	7.23982	4.60706	0.000390769	0.0151526	0.076778
Pex16	0.203959	4.39378	3.53079	0.00325245	0.0454263	-1.80353
RGD1562987	0.203883	6.62835	4.82279	0.000258907	0.0129952	0.489247
Eif3m	0.203496	6.20908	5.14915	0.00014039	0.00950855	1.10922
Ube2v2	0.203328	6.48612	4.09292	0.00106334	0.0251031	-0.908892
Eif2s1	0.203193	5.55734	4.43158	0.000548303	0.0177659	-0.203417
Emc7	0.20314	6.4568	4.55181	0.000434595	0.0160252	-0.0214914
Eif1a	0.203057	5.33938	4.67758	0.000341372	0.0144644	0.281623
Nudt2	0.202976	5.17849	4.05065	0.0011558	0.0260782	-0.901323
Atp5g3	0.202624	8.02798	4.89121	0.00022748	0.0122472	0.622813
Ssu72	0.202487	6.45654	4.17946	0.00089688	0.0232235	-0.739624
Rpl23	0.202265	7.05177	4.61816	0.000382534	0.0151096	0.0974546
Ndufs4	0.20217	6.89694	4.88341	0.000230855	0.0122964	0.600219
Tma7	0.201866	5.97046	3.94708	0.00141857	0.0295923	-1.17016
Cox7a2l	0.20166	7.37579	4.07107	0.00111014	0.0257412	-0.957606
Tmem186	0.201592	4.58399	3.55416	0.00310382	0.0444039	-1.78627
Clta	0.201386	7.6783	4.54877	0.000437149	0.0160252	-0.030763
Cops2	0.201208	7.26964	4.33609	0.00066017	0.0199064	-0.443679
Bag1	0.201132	5.91935	3.47906	0.00360743	0.0484745	-2.08178
Dis3l	0.201066	4.82638	3.78172	0.00197034	0.0358022	-1.38006
Cops7a	0.200949	6.8825	4.13841	0.000972234	0.0238856	-0.827272
Atp5j	0.200884	7.25312	4.45551	0.000523453	0.0173707	-0.213525
Glod4	0.200023	5.94554	4.09367	0.00106176	0.0251031	-0.883158
Tcta	0.199927	5.43301	4.43473	0.000544966	0.0177446	-0.187146
Atp6v1c1	0.199199	7.7208	3.71898	0.00223284	0.0375896	-1.64265
Hars	0.199182	6.6794	4.63634	0.00036942	0.0151096	0.134981
Rpl37a	0.199166	7.06555	4.68606	0.000335877	0.0144084	0.226753
Akr1a1	0.199011	8.60712	4.37715	0.000609439	0.0189729	-0.344108
Calm1	0.198733	10.1304	3.80373	0.00188588	0.0349075	-1.41258
Sar1b	0.198156	5.86801	4.24538	0.000788139	0.021901	-0.58409
Phb	0.197965	6.52321	4.59836	0.000397359	0.015252	0.0656723
Ndufs2	0.19765	8.14674	4.23125	0.000810251	0.0221031	-0.635768
Ntan1	0.197596	5.70835	3.70911	0.00227728	0.0378941	-1.61608
Eif5a	0.197565	7.96672	4.60712	0.000390727	0.0151526	0.0844227
Vdac3	0.197136	7.95327	4.3154	0.000687351	0.0203868	-0.476099
Anp32a_1	0.196992	4.70378	3.75018	0.00209818	0.0366071	-1.42489
Thumpd3	0.196812	5.43433	3.61062	0.00277234	0.0422814	-1.78306
Lias	0.196747	5.04851	3.73091	0.00218036	0.0371664	-1.5062
Vimp	0.196585	5.24428	3.60866	0.00278327	0.0423394	-1.76663
Pgk1	0.196525	9.15804	4.1485	0.000953137	0.0236496	-0.772078
Slc25a5	0.196458	8.00148	4.78055	0.000280519	0.0134197	0.414114
Ipo11	0.196297	5.55075	4.0171	0.00123499	0.0270785	-1.00244
Cycs	0.196182	7.20706	3.68722	0.00237898	0.0386152	-1.71021
LOC361985	0.196155	6.12708	3.73284	0.00217198	0.0371664	-1.59798
Slc25a11	0.195692	6.64441	4.47336	0.000505676	0.0171143	-0.176273
Pdhb	0.195598	7.36797	4.52017	0.000461934	0.0165587	-0.0886119
Guk1	0.195572	6.8627	3.45505	0.00378514	0.0497158	-2.16486
Ndufs3	0.195516	6.45596	4.7345	0.000306212	0.0139649	0.326283
Mrps36	0.195313	5.32416	3.93716	0.00144673	0.0299498	-1.13624
Sod2	0.195206	7.99562	4.14585	0.000958118	0.0236815	-0.80422
Mrpl13	0.194565	5.33216	4.32066	0.000680332	0.020294	-0.396551
Hcfc1r1	0.194535	6.45139	3.69288	0.00235224	0.0385061	-1.69024
Eif3e	0.194521	5.87105	5.08588	0.00015791	0.00994587	1.00739
Ugp2	0.193014	6.98323	4.09728	0.00105424	0.0249997	-0.907924
Sugt1	0.192958	5.92478	3.59489	0.00286098	0.0428569	-1.85575
Pdcd10	0.192889	5.90713	4.02771	0.00120937	0.0267482	-1.00902
Rps4x	0.192823	7.62687	4.21515	0.000836225	0.0224509	-0.674633
Nedd8	0.19272	6.5806	4.92348	0.000214053	0.0118266	0.679373
Cdk9	0.192674	5.95238	4.66155	0.000352004	0.0147487	0.208282
Vapa	0.192385	7.60589	4.41566	0.00056551	0.0181241	-0.287136
Atp6v1g1	0.191915	7.20686	4.04777	0.00116238	0.0261544	-1.00425
Tmem70	0.191821	5.53851	4.99674	0.000186529	0.0108673	0.862747
Iscu	0.191659	6.90686	3.70083	0.00231519	0.038222	-1.68342
Gcsh	0.191365	5.87351	4.02741	0.00121008	0.0267482	-1.00737
Arpc5l	0.191212	5.63353	4.53416	0.000449636	0.0163361	-0.0134486
Mlx	0.191073	5.43361	3.99519	0.00128967	0.0278287	-1.03433
Cops6	0.1908	6.8624	4.51697	0.000464796	0.0165587	-0.0953531
Pet100	0.190681	5.26155	3.50069	0.00345449	0.0470787	-1.97862
Timm8b	0.190286	6.3967	4.25602	0.000771909	0.0218167	-0.589269
Actr10	0.190227	6.77561	4.36077	0.000629179	0.0194023	-0.395102
Upf3a	0.190052	5.29049	3.67543	0.0024356	0.039172	-1.64175
Prdx2	0.189629	8.23827	3.81519	0.00184335	0.0344846	-1.44527
Vbp1	0.189434	5.99218	3.83818	0.00176093	0.0335724	-1.38419
Eif2s2	0.188531	6.5703	4.7863	0.000277471	0.0133965	0.421501
Utp3	0.18839	4.63879	4.05094	0.00115513	0.0260782	-0.837952
Txn2	0.188344	6.26625	3.95611	0.00139341	0.02933	-1.16792
Rala	0.188008	6.68013	3.98065	0.00132733	0.0283533	-1.13254
Cmpk1	0.187746	6.89976	4.63104	0.000373196	0.0151096	0.122457
Cops4	0.187651	6.33919	4.35118	0.000641034	0.0195462	-0.403258
Setd3	0.187436	7.11575	4.18692	0.000883839	0.023143	-0.733498
Psmb3	0.187307	6.06132	3.52181	0.00331146	0.0458937	-2.0074
Selk	0.187001	6.29269	4.22422	0.000821502	0.0221152	-0.647075
Ndufa9	0.186866	6.75366	3.68747	0.00237775	0.0386152	-1.70799
Nop10	0.186504	5.95964	4.17501	0.000904757	0.0233278	-0.726139
Pgam1	0.186462	9.20034	3.57137	0.00299876	0.0437481	-1.89679
Sdhb	0.186404	7.17836	4.18135	0.000893568	0.023221	-0.744156
Ndfip1	0.18562	8.89776	4.03714	0.00118705	0.0263819	-0.995587
Clns1a	0.185592	5.81021	3.72902	0.00218856	0.0371895	-1.58526
Pfdn5	0.185311	5.94633	4.19146	0.000875994	0.0230485	-0.693457
LOC100910788	0.184644	5.55401	3.47655	0.00362555	0.0485519	-2.05631
Psma6	0.18455	6.71398	4.34897	0.000643809	0.0195941	-0.417032
Lipa	0.184545	6.00091	4.11537	0.00101733	0.0245863	-0.844278
Mcoln1	0.184299	5.97794	3.51598	0.00335029	0.0461599	-2.01364
Cdk5	0.18424	6.02906	3.76561	0.00203463	0.0361394	-1.52833
LOC100910850	0.184013	7.28729	4.17476	0.000905196	0.0233278	-0.756367
Ptcd3	0.183866	5.84999	3.85502	0.00170294	0.0330251	-1.34193
Cept1	0.183808	5.79057	4.58339	0.000408963	0.0155277	0.069378
Psmc3	0.183259	7.13131	4.33726	0.000658664	0.0198978	-0.442031
Ndufb7	0.182878	6.05761	3.70256	0.00230723	0.0381336	-1.65343
Tsg101	0.182863	6.7291	3.89511	0.00157261	0.0315159	-1.30066
Vps29	0.18278	5.82369	3.4953	0.00349193	0.047456	-2.0431
Oaz1	0.182115	8.1736	3.67091	0.00245771	0.0392025	-1.72929
Idh3g	0.182017	7.30619	3.93619	0.00144953	0.0299697	-1.22168
Fkbp8	0.182	8.13468	3.56542	0.00303466	0.0438869	-1.93677
Uqcrc2	0.181936	8.29104	4.39811	0.000585111	0.0184265	-0.310608
Tmem59	0.181658	8.18526	3.46524	0.00370863	0.0493063	-2.13186
Plekhb2	0.18135	9.17132	3.99883	0.00128043	0.0277761	-1.06265
Eif4a2	0.181319	9.14729	4.68507	0.000336517	0.0144084	0.257094
Mdh1	0.181142	9.5966	3.85964	0.00168737	0.0328231	-1.32113
Psmd8	0.180798	6.49273	4.25672	0.000770849	0.0218167	-0.590862
Sbds	0.180725	6.49844	3.60444	0.00280684	0.0425149	-1.86518
Cct8	0.18057	7.79026	4.06446	0.00112472	0.0258054	-0.965784
Ppp2r2d	0.180297	5.59356	4.16147	0.000929137	0.0235873	-0.726208
Atpif1	0.17975	6.81454	3.85942	0.00168814	0.0328231	-1.37173
Pigy	0.179687	5.42236	3.59308	0.00287134	0.0429109	-1.81612
Bckdha	0.179396	6.06564	3.80278	0.00188944	0.0349075	-1.45778
Rpl27a	0.179175	7.46157	3.69063	0.00236282	0.0385061	-1.70143
Mrps33	0.178919	4.89662	3.49332	0.00350582	0.0474609	-1.94754
Wdr61	0.178822	5.59271	4.17177	0.000910529	0.0234282	-0.706226
Cir1	0.178431	5.15143	3.61045	0.00277332	0.0422814	-1.75252
H2afz	0.178258	5.79107	3.62462	0.00269583	0.0415662	-1.78789
Psme3	0.178172	6.73099	4.0374	0.00118644	0.0263819	-1.02253
Prnp	0.178165	9.46035	4.14734	0.000955301	0.0236496	-0.765701
Txndc9	0.178148	5.36845	3.85453	0.0017046	0.0330251	-1.30137
Pfdn6	0.17796	5.70791	3.67599	0.00243288	0.039172	-1.68081
Cfap36	0.177869	7.40706	4.93147	0.000210855	0.0117395	0.691466
Gps1	0.177808	6.92315	3.67073	0.00245858	0.0392025	-1.74261
Pcna	0.17753	5.35023	3.64911	0.00256711	0.0403053	-1.69943
Ptp4a2	0.177482	7.02931	3.54732	0.00314662	0.0446293	-1.98497
Prdx3	0.177345	6.23473	3.69175	0.00235755	0.0385061	-1.6839
Dnajc8	0.177237	6.38989	3.54532	0.00315921	0.0446293	-1.97734
Rbbp7	0.177218	6.88323	4.25877	0.000767753	0.0218167	-0.593476
Morf4l1	0.177062	8.67334	4.23937	0.000797466	0.0219639	-0.608591
Ndufb5	0.176941	6.63471	3.59601	0.00285453	0.0427996	-1.88524
Rpl15	0.176768	7.07681	4.18093	0.000894298	0.023221	-0.745232
Nploc4	0.17618	6.17751	3.57959	0.00294986	0.0434797	-1.90073
Psmd12	0.175125	6.77244	3.76508	0.00203678	0.0361394	-1.55612
Vps25	0.174879	5.71392	4.24021	0.000796158	0.0219639	-0.583469
Trap1	0.174863	6.43106	3.66456	0.00248907	0.0394215	-1.74511
Pex14	0.174149	5.77016	3.57767	0.0029612	0.0434797	-1.87798
Rnasek	0.174144	6.94253	3.54698	0.00314874	0.0446293	-1.9854
Cox8a	0.173847	7.594	3.74493	0.00212023	0.036855	-1.59342
Tax1bp1	0.173604	7.82999	4.31863	0.000683033	0.0202957	-0.471625
Tomm20	0.173266	6.8566	3.85098	0.0017167	0.033128	-1.38866
Immt	0.173109	7.65484	4.32346	0.000676622	0.0202527	-0.464482
Copg2	0.172569	7.10944	3.64346	0.00259625	0.0405676	-1.79641
Rtcd1	0.172358	5.96444	3.60435	0.00280736	0.0425149	-1.83999
Ufd1l	0.172316	6.21071	3.57831	0.00295741	0.0434797	-1.90495
Cisd1	0.172188	6.0403	3.75232	0.00208921	0.0366012	-1.55503
Slc30a9	0.172102	7.86005	4.20594	0.000851472	0.0226222	-0.689535
Rpl36al	0.171895	5.42734	4.19063	0.000877426	0.023049	-0.655516
Ubxn1	0.171845	6.34006	3.63808	0.0026243	0.0408104	-1.79364
Sdha	0.171833	8.77881	3.58963	0.0028912	0.0430723	-1.87346
Psma3	0.171814	6.87115	3.77022	0.00201601	0.0359815	-1.54707
Sdhc	0.171486	7.35501	4.1473	0.000955377	0.0236496	-0.809299
Tmem184c	0.170885	6.0623	3.85055	0.00171816	0.033128	-1.36419
Rps23	0.170211	7.17255	3.67149	0.00245485	0.0392025	-1.74123
Rnf115	0.170191	6.33082	4.47596	0.000503136	0.0170993	-0.162877
Mpc2	0.170016	6.61266	3.65701	0.00252691	0.0399046	-1.76513
Gdi2	0.169563	8.03042	4.08046	0.00108978	0.025506	-0.930961
Eef1b2	0.169313	6.93627	3.59064	0.00288535	0.0430245	-1.89977
Atp5d	0.168989	7.52814	3.62758	0.00267994	0.0414312	-1.82433
Chchd3	0.168977	6.23168	3.61154	0.00276726	0.0422682	-1.8409
Pmpcb	0.168858	6.12277	4.18128	0.000893675	0.023221	-0.722869
Uba3	0.168845	6.60538	4.26936	0.000752026	0.0216363	-0.569103
Dnaja2	0.16866	7.3161	3.78524	0.00195661	0.0356828	-1.51729
Gabarapl2	0.168498	7.27412	3.54292	0.00317441	0.0446862	-1.99278
Vdac2	0.168434	8.11363	3.66956	0.00246434	0.0392202	-1.73312
Dld	0.168375	7.48078	3.80099	0.00189619	0.0349694	-1.48485
Cops3	0.168251	6.30746	3.51924	0.00332853	0.0460156	-2.02504
Aco2	0.168132	9.55175	4.15792	0.000935652	0.0235873	-0.742519
Hsd17b10	0.168021	5.30004	3.81192	0.00185539	0.0345513	-1.37726
Ndufs5	0.167817	6.28526	3.62293	0.00270499	0.0416287	-1.821
Eif3g	0.167588	6.27849	3.73109	0.00217958	0.0371664	-1.6088
Cetn2	0.167344	5.9627	3.86365	0.00167397	0.0327822	-1.3327
Bzw1	0.167049	7.74446	4.7514	0.000296513	0.0137027	0.355677
Rpl13a	0.16662	8.3107	3.86277	0.00167692	0.0328005	-1.3506
Tmem183a	0.166521	6.35585	3.96723	0.00136305	0.0288023	-1.14989
Mea1	0.16626	6.27516	3.69881	0.00232457	0.0382651	-1.6719
Tomm22	0.166163	5.89318	3.49418	0.00349983	0.047456	-2.05047
Acad9	0.165847	5.8249	3.67301	0.00244743	0.0392025	-1.69593
Ppp1r2	0.165529	7.20219	3.60836	0.0027849	0.0423394	-1.86494
Stx12	0.165242	7.48259	3.73974	0.00214227	0.0370592	-1.6049
Uqcr11	0.164959	6.92414	3.46215	0.00373167	0.0494119	-2.15153
Park7	0.164542	7.51466	3.73379	0.00216786	0.0371664	-1.61621
Oat	0.164358	6.80532	3.61684	0.0027381	0.0419406	-1.84729
Atp6ap1	0.163961	8.47042	4.24543	0.000788069	0.021901	-0.601646
Rnf11l1	0.163161	6.65881	3.52546	0.00328736	0.0457956	-2.02408
St3gal5	0.162275	6.83501	4.06324	0.00112743	0.0258311	-0.973442
Grsf1	0.162138	7.3075	4.02741	0.00121009	0.0267482	-1.04339
Eif2s3y	0.162092	6.24412	3.5198	0.0033248	0.0460029	-2.02115
Adh5	0.161544	5.76268	4.00693	0.00126008	0.0274342	-1.03948
Dpm1	0.16143	4.97789	3.7913	0.00193313	0.0354547	-1.38075
Eif2s3	0.16132	6.89362	3.56827	0.00301745	0.0438061	-1.94337
Psma5	0.161221	5.90854	3.85468	0.00170411	0.0330251	-1.34669
Ube2d3	0.160276	7.84556	3.69646	0.00233546	0.0383283	-1.68502
Ppp1cc	0.160259	7.65809	4.31941	0.000681995	0.0202957	-0.472288
Ndufs1	0.16022	8.19429	3.87869	0.00162473	0.0320485	-1.32193
Gtf2f1	0.159981	6.22153	3.93749	0.0014458	0.0299498	-1.20241
Ndufaf7	0.15933	5.43177	3.51662	0.00334601	0.0461599	-1.96612
Maea	0.159053	6.61582	3.77868	0.0019823	0.0358905	-1.52667
Stip1	0.158989	8.15907	3.76859	0.00202258	0.036045	-1.5382
Rpl32	0.158416	6.91271	3.57621	0.00296986	0.0434896	-1.92795
Rpl10	0.157051	7.56657	4.21177	0.000841788	0.0225116	-0.681893
Rnf146	0.156643	5.45413	3.5603	0.00306593	0.0441414	-1.88328
Ndufv1	0.156571	7.55596	3.50713	0.00341024	0.0466705	-2.06011
Poldip2	0.155845	6.86309	3.60128	0.00282464	0.0425536	-1.87838
Capza2	0.155719	7.52621	3.88339	0.00160962	0.0319049	-1.32293
Ncl	0.153698	8.30311	3.92667	0.00147713	0.0303863	-1.2258
Ndufb4	0.153585	6.58362	4.03827	0.00118439	0.0263819	-1.01805
Sdcbp	0.15295	8.45095	3.76769	0.00202619	0.036045	-1.53344
Mtch2	0.152423	6.55928	3.70996	0.00227339	0.0378941	-1.66004
Csde1	0.15119	7.78067	3.68318	0.0023982	0.0388499	-1.71202
Tmem55b	0.151108	5.95651	3.50715	0.0034101	0.0466705	-2.02963
Cct5	0.150736	7.47815	4.07893	0.00109306	0.025546	-0.94133
Slc25a3	0.148104	8.77005	3.50783	0.00340541	0.0466705	-2.03374
Abcf3	0.147772	6.80335	3.75791	0.0020661	0.036437	-1.57063
Micu2	0.146947	5.84483	3.46014	0.00374674	0.0494481	-2.11348
Psma1	0.146873	6.31718	3.7816	0.00197084	0.0358022	-1.51154
Prelid1	0.146488	6.69484	3.457	0.00377033	0.0496387	-2.15884
Ttc9c	0.146359	6.06039	3.59803	0.00284303	0.0427167	-1.85833
Polr2e	0.14541	5.89843	3.47571	0.00363171	0.0485519	-2.08699
Ndufab1	0.144887	6.589	3.65609	0.00253156	0.0399393	-1.76641
Nsfl1c	0.143655	7.09699	3.51622	0.00334871	0.0461599	-2.04597
Cnbp	0.143485	7.93298	3.71088	0.00226922	0.0378893	-1.65539
Eif4a1	0.142584	7.57625	3.49693	0.00348061	0.047395	-2.07985
Snx6	0.140669	5.87701	3.6272	0.00268199	0.0414312	-1.78932
Arf1	0.139566	8.4229	3.65443	0.00253994	0.0399943	-1.75596
Pes1	0.13842	5.72786	3.55968	0.00306972	0.0441414	-1.90979
Ivd	0.134886	6.5579	3.67253	0.00244978	0.0392025	-1.73343
Mrfap1	0.134617	8.53359	3.5244	0.00329433	0.0458145	-2.00778
Rcc2	0.132781	6.4484	3.58347	0.00292708	0.0433298	-1.90474
Sec62	0.132591	8.19332	3.78658	0.00195136	0.0356468	-1.50227
Cap1	0.130246	7.84227	3.60283	0.00281589	0.0425149	-1.86865
Atad1	0.129381	7.04077	3.48768	0.00354567	0.0478812	-2.10193

## Sheet: DEGs_down
GeneID	logFC	AveExpr	t	P.Value	adj.P.Val	B
Ifnar1	-0.129793	6.58227	-3.58748	0.00290369	0.0431402	-1.90069
Ttc17	-0.132032	5.80694	-3.46211	0.00373201	0.0494119	-2.10662
Edc4	-0.135083	6.04739	-3.60324	0.00281358	0.0425149	-1.84722
Scap	-0.14095	6.93409	-3.57352	0.0029859	0.0436461	-1.9333
Znf740	-0.141156	6.23977	-3.72979	0.00218522	0.0371895	-1.60956
Safb	-0.146751	6.7	-3.65543	0.0025349	0.0399535	-1.76995
Naa25	-0.147257	5.53038	-3.56139	0.00305922	0.0441272	-1.88857
Rc3h1	-0.148016	6.37595	-3.49468	0.00349633	0.047456	-2.07592
Ing4	-0.151463	5.18411	-3.57632	0.0029692	0.0434896	-1.82254
Sppl3	-0.152262	6.16028	-3.50239	0.00344276	0.047032	-2.05088
Rexo1	-0.15279	5.59215	-3.55384	0.0031058	0.0444039	-1.90907
Scarb2	-0.156098	7.27705	-3.58763	0.00290279	0.0431402	-1.90507
Gon4l	-0.158572	5.93482	-3.48666	0.00355288	0.0479389	-2.06796
Tecpr2	-0.158737	6.15351	-3.66359	0.00249392	0.03946	-1.73493
Ankrd11	-0.160492	7.57632	-3.87531	0.00163566	0.0321475	-1.33814
Son	-0.160524	8.47347	-3.52229	0.00330825	0.0458907	-2.01342
Sobp	-0.160655	6.10484	-3.58109	0.00294101	0.0434572	-1.89385
Dmd	-0.160872	6.52714	-3.70361	0.00230237	0.0380918	-1.67149
Shprh	-0.160972	5.59108	-3.49243	0.00351212	0.0474851	-2.02874
Upf1	-0.161869	6.488	-4.42727	0.00055291	0.0178606	-0.261268
Nol6	-0.16226	6.63546	-3.56137	0.00305939	0.0441272	-1.95306
Pfas	-0.165509	6.47882	-3.45663	0.00377318	0.0496387	-2.15395
Focad	-0.166101	5.91314	-3.67509	0.00243729	0.039172	-1.69796
Pde4dip	-0.16641	8.05778	-3.77092	0.00201319	0.0359815	-1.53551
Kmt5b	-0.167442	5.84236	-3.73368	0.00216832	0.0371664	-1.57837
Dgkd	-0.169064	6.53275	-3.6686	0.00246909	0.0392482	-1.74027
Sec24b	-0.169487	6.05207	-4.11598	0.00101611	0.0245863	-0.845829
Ptpn23	-0.170435	6.23098	-3.94108	0.00143554	0.0298698	-1.19564
B3glct	-0.170519	4.77305	-3.51728	0.00334163	0.0461576	-1.88411
Zc3h4	-0.170785	6.13706	-3.71368	0.00225658	0.0378247	-1.63595
Sos2	-0.170936	5.71256	-3.45119	0.00381448	0.0499403	-2.11999
Fam193a	-0.1711	5.23257	-4.00643	0.00126131	0.0274342	-0.992445
Chd2	-0.171565	6.78483	-3.53008	0.00325705	0.0454263	-2.01697
Ints1	-0.172563	6.15661	-4.35623	0.000634761	0.019464	-0.385938
Pknox1	-0.173009	4.63734	-3.56812	0.00301833	0.0438061	-1.76685
Ddx17	-0.174182	7.37871	-3.7534	0.00208472	0.0366012	-1.57912
Plekhm1	-0.174747	5.00381	-3.96973	0.00135632	0.028772	-1.03824
Rsf1	-0.174911	6.21378	-3.95507	0.00139628	0.0293524	-1.1675
Zmynd8	-0.175989	6.88576	-4.29092	0.000720994	0.0210028	-0.53112
Aco1	-0.176199	5.8822	-4.36875	0.000619485	0.0192123	-0.346994
Ralgds	-0.176659	6.40421	-3.81125	0.00185784	0.0345575	-1.4566
Ampd2	-0.177288	6.95007	-3.69655	0.00233508	0.0383283	-1.69199
Med14	-0.178098	5.89182	-3.55168	0.00311929	0.0444798	-1.93778
Fchsd2	-0.178795	5.93499	-3.74784	0.00210795	0.0367383	-1.55705
Lrrc8d	-0.179013	6.0654	-3.56546	0.00303446	0.0438869	-1.92207
Zhx3	-0.179792	7.0571	-3.69094	0.00236134	0.0385061	-1.70321
Cdh2	-0.179988	7.6106	-3.67369	0.00244408	0.0392025	-1.73287
Mllt1	-0.180248	5.61174	-3.55478	0.00309997	0.0443985	-1.90893
Ncoa2	-0.180938	6.36899	-3.70855	0.00227981	0.0378941	-1.65649
RGD1559904	-0.18124	5.48207	-3.8609	0.00168317	0.0328231	-1.29982
Iws1	-0.181284	4.85713	-3.49624	0.00348537	0.0474202	-1.9363
Numa1	-0.184129	7.36741	-4.41721	0.000563809	0.0181051	-0.286434
Phc1	-0.184494	5.51157	-4.40432	0.000578096	0.0183223	-0.251753
Prex1	-0.184529	7.4738	-4.40929	0.000572547	0.0182689	-0.300752
Ubr5	-0.184984	7.73169	-4.16839	0.000916596	0.0234364	-0.764171
Gramd4	-0.1857	5.52522	-3.46335	0.00372274	0.0493732	-2.07899
Vps13a	-0.186309	6.27987	-3.7357	0.00215962	0.0371664	-1.59962
Dock7	-0.187299	6.56553	-3.68125	0.00240749	0.0389231	-1.71628
Sik2	-0.187785	6.23553	-3.62139	0.00271331	0.0417175	-1.82154
Dvl3	-0.189567	6.48437	-3.77969	0.00197832	0.0358581	-1.52099
Cdc42bpb	-0.189783	7.40571	-4.60057	0.000395678	0.015252	0.0655313
Tm9sf4	-0.190335	6.2791	-4.98823	0.000189528	0.0108869	0.808627
Sorcs1	-0.190958	6.2596	-3.56872	0.00301469	0.0438061	-1.9258
Tsc2	-0.191033	6.67235	-4.25313	0.000776272	0.0218167	-0.601679
Xpo5	-0.191452	6.19906	-4.18036	0.000895301	0.023221	-0.728053
Cic	-0.191675	7.27774	-4.88528	0.000230041	0.0122964	0.603978
Srebf2	-0.191677	7.74745	-3.84419	0.00174001	0.0334222	-1.39688
Rps6ka3	-0.19172	5.63831	-3.76782	0.00202569	0.036045	-1.49532
Kidins220	-0.1934	8.97232	-3.90932	0.00152886	0.0309859	-1.24276
Dlc1	-0.195769	5.80074	-3.54807	0.00314186	0.0446293	-1.93792
Setx	-0.195788	6.59341	-3.88167	0.00161513	0.0319365	-1.32419
Chd6	-0.198622	7.13095	-3.78495	0.00195771	0.0356828	-1.51874
LOC102546572	-0.198828	6.42877	-4.59192	0.00040231	0.0153697	0.0560566
Cbl	-0.201529	6.57468	-4.10044	0.00104769	0.0249785	-0.896406
Tmem131	-0.201862	6.37232	-4.47632	0.000502785	0.0170993	-0.163378
Ice1	-0.20248	6.28105	-4.0693	0.00111404	0.0257412	-0.947536
Ccdc88a	-0.203206	7.27202	-3.53801	0.0032058	0.0449666	-2.00235
Rapgef2	-0.203261	6.46125	-3.75656	0.00207166	0.0364957	-1.56558
Ncln	-0.203536	6.19908	-3.57853	0.00295614	0.0434797	-1.90367
Hdac4	-0.203779	5.84967	-4.53654	0.000447571	0.0162974	-0.0233497
Zfp318	-0.204112	5.7149	-4.27019	0.000750794	0.0216363	-0.525375
Bicd2	-0.204267	6.86615	-4.23745	0.00080047	0.0219833	-0.634547
Acap3	-0.205789	5.66742	-3.8865	0.0015997	0.0317468	-1.26617
Arhgap39	-0.206035	5.58291	-4.15479	0.000941429	0.0235907	-0.737985
RGD1308428	-0.2061	5.56271	-4.64715	0.000361845	0.0149437	0.206627
Tnik	-0.206628	7.07027	-4.48197	0.000497317	0.0170794	-0.16314
Phf12	-0.207279	5.37293	-3.75059	0.00209646	0.0366071	-1.50376
Gcn1l1	-0.207631	6.75031	-4.75404	0.000295028	0.0137027	0.357659
Tpcn1	-0.209017	7.21465	-3.61321	0.00275806	0.042167	-1.85522
Dicer1	-0.210032	6.26254	-5.03996	0.000172035	0.0103941	0.905503
Srgap3	-0.210632	7.50364	-3.55855	0.00307666	0.0441809	-1.9599
Ptprg	-0.212045	5.8493	-4.34535	0.000648366	0.0196678	-0.389797
Prr14l	-0.21213	5.96565	-3.56626	0.00302958	0.0438869	-1.91413
Phf2	-0.212239	5.99478	-4.10464	0.00103906	0.0248901	-0.86448
Fbxl19	-0.21228	5.85479	-3.66733	0.00247535	0.0392805	-1.70881
Rnf44	-0.212468	6.73724	-5.46659	7.844e-05	0.0072704	1.67629
Grik5	-0.212999	6.50343	-3.46364	0.00372054	0.0493732	-2.14081
Dennd4b	-0.213048	6.20454	-4.05658	0.00114234	0.0259541	-0.968938
Zfp609	-0.213328	6.19638	-3.71226	0.00226297	0.037825	-1.64157
Arhgap21	-0.213388	7.70297	-5.15865	0.000137938	0.00950855	1.11653
Atxn2l	-0.213992	7.17118	-3.70741	0.00228501	0.0378941	-1.67065
Crtc1	-0.215104	6.53411	-4.55509	0.000431859	0.0160252	-0.0170467
Ski	-0.215612	6.48743	-3.83738	0.00176372	0.0335724	-1.40797
Zfp335	-0.215769	5.64857	-3.82184	0.00181912	0.0341881	-1.39066
Ptprs	-0.215975	8.54516	-3.70396	0.00230079	0.0380918	-1.65583
Pogz	-0.216937	5.86689	-3.45926	0.00375333	0.0494573	-2.11637
Sec16a	-0.216998	6.86677	-3.77336	0.00200346	0.0359815	-1.54069
Ogt	-0.217256	7.8454	-3.54593	0.00315539	0.0446293	-1.98004
Usp34	-0.217717	7.86979	-3.75932	0.00206028	0.0363738	-1.56136
Ylpm1	-0.218024	6.80451	-3.47539	0.00363403	0.0485519	-2.12421
Cdan1	-0.218522	4.91109	-3.77355	0.00200268	0.0359815	-1.40625
Nhlrc2	-0.218913	5.24005	-3.73213	0.00217506	0.0371664	-1.5255
Pnpla7	-0.220153	4.71559	-3.8323	0.00178165	0.0337666	-1.26759
Dock3	-0.220518	7.18207	-4.05911	0.00113665	0.0258969	-0.982095
Smpd3	-0.220974	5.29574	-3.6263	0.00268682	0.0414665	-1.73757
Ubr2	-0.221085	6.68445	-4.78455	0.000278392	0.0133965	0.416333
Tjp1	-0.221178	7.73389	-3.90307	0.00154795	0.031175	-1.28178
Vps13b	-0.221207	6.38305	-4.37948	0.000606692	0.0189468	-0.349923
Elmsan1	-0.222136	5.08488	-4.72323	0.000312865	0.0140599	0.389863
Epc1	-0.22229	5.25606	-5.02666	0.000176368	0.0105003	0.938998
Scrib	-0.222978	6.47495	-3.75223	0.00208958	0.0366012	-1.57439
Afap1	-0.223222	5.13112	-3.98635	0.00131243	0.0281336	-1.02017
Apc	-0.223431	8.22376	-4.40202	0.00058068	0.0183223	-0.304305
Anks1a	-0.224348	6.22291	-3.86052	0.00168445	0.0328231	-1.35255
Magi1	-0.225014	6.73371	-4.24575	0.000787574	0.021901	-0.616904
Flrt1	-0.22513	5.55948	-3.71691	0.00224209	0.0377065	-1.58746
Arid2	-0.225368	5.85741	-4.04292	0.00117356	0.0262804	-0.975774
Capn15	-0.225688	5.50585	-4.73857	0.000303847	0.0139649	0.383495
Whsc1l1	-0.225779	6.7672	-4.26	0.000765922	0.0218167	-0.589715
Trim62	-0.225895	4.04637	-3.4731	0.0036507	0.0486154	-1.86224
Atxn1	-0.226047	4.34338	-3.50202	0.0034453	0.047032	-1.8509
Zmym3	-0.227127	6.99791	-3.60524	0.00280235	0.0425149	-1.87115
Hivep2	-0.22748	6.27928	-3.82023	0.00182494	0.0342561	-1.4339
Rgs12	-0.227719	5.25535	-3.81255	0.00185306	0.0345474	-1.37073
Cramp1	-0.228158	4.64679	-4.14224	0.000964933	0.023742	-0.663866
Pabpn1	-0.228192	7.0125	-3.9503	0.00140954	0.0295065	-1.19485
Ndst1	-0.228392	7.35748	-3.97219	0.00134974	0.0287071	-1.15076
Ptprf	-0.229669	7.44067	-4.17558	0.000903738	0.0233278	-0.75344
RGD1565616	-0.229944	8.02709	-4.27729	0.000740458	0.0214549	-0.548584
Purb	-0.230204	6.06082	-3.79384	0.00192337	0.0353332	-1.47457
Prkdc	-0.230486	5.49567	-3.57678	0.00296648	0.0434896	-1.85475
Fam160b1	-0.231028	5.00395	-3.92446	0.00148364	0.030409	-1.1254
Zfp592	-0.231184	5.35041	-3.91585	0.00150918	0.030763	-1.17989
Vps13d	-0.231724	7.27091	-4.51213	0.000469163	0.0166558	-0.104607
Prrc2a	-0.231827	8.72627	-5.15232	0.000139567	0.00950855	1.1207
Zzef1	-0.232324	6.53641	-5.29033	0.00010819	0.0086941	1.35941
Tnrc6c	-0.2324	6.07904	-4.11052	0.0010271	0.024749	-0.85763
Phf8	-0.232732	5.54169	-3.52477	0.00329191	0.0458145	-1.96059
Rprd2	-0.232837	5.98876	-5.06502	0.000164171	0.0101039	0.963243
Kdm5b	-0.234908	5.97632	-6.24972	1.97844e-05	0.00388848	3.0609
Nol4l	-0.235599	5.46174	-4.30696	0.000698766	0.0206618	-0.434105
Mast3	-0.23667	6.49072	-4.87121	0.000236233	0.0123483	0.583566
Dusp8	-0.236834	5.70393	-3.53046	0.00325458	0.0454263	-1.9642
Htt	-0.237207	7.29503	-4.87869	0.000232918	0.0122964	0.591759
Clk2	-0.237304	4.5811	-3.89887	0.00156089	0.0313582	-1.12179
Usp24	-0.238466	6.93266	-4.89693	0.000225037	0.0121961	0.625637
Tnrc6b	-0.238911	7.15012	-4.24176	0.000793752	0.0219559	-0.62678
Ncor1	-0.239252	6.98829	-4.61958	0.000381492	0.0151096	0.10042
Dlgap3	-0.239354	6.2176	-3.46415	0.00371675	0.0493732	-2.12825
Nup188	-0.239362	4.88068	-4.02477	0.0012164	0.0268151	-0.917202
Zbtb44	-0.23953	5.11693	-3.90718	0.00153536	0.0310421	-1.17174
Dclk2	-0.24007	6.78239	-4.5989	0.00039695	0.015252	0.0624116
Nf1	-0.240261	7.08674	-4.4519	0.000527127	0.0173718	-0.220861
Cep250	-0.240431	5.10899	-3.6395	0.00261688	0.0407339	-1.69036
Zfp608	-0.241214	5.00657	-4.09155	0.00106622	0.0251347	-0.803175
Abhd1	-0.241309	4.36765	-3.59262	0.00287395	0.0429109	-1.68061
Mpzl1	-0.242052	5.41987	-4.01304	0.00124493	0.0272232	-0.997887
Frmd4a	-0.24215	4.97817	-3.77035	0.00201547	0.0359815	-1.42055
Jph4	-0.242276	7.00005	-3.6193	0.00272469	0.0418372	-1.84354
Bcl9	-0.242832	5.52263	-4.13449	0.000979762	0.0239623	-0.77189
Kmt2e	-0.243054	7.00033	-5.57919	6.40127e-05	0.00673703	1.87707
Dido1	-0.243312	6.10995	-5.01394	0.000180617	0.0106475	0.8631
Epg5	-0.243724	6.16642	-5.67195	5.4215e-05	0.00589606	2.05606
Chd8	-0.243802	6.89135	-5.80429	4.28624e-05	0.00521802	2.27661
Atf7ip	-0.243884	6.47834	-4.77389	0.000284093	0.0135509	0.400488
Ncor2	-0.244491	7.80811	-4.29988	0.000708479	0.0208613	-0.508094
Zfp827	-0.245283	5.7248	-5.5172	7.15757e-05	0.00694649	1.79917
Erc1	-0.245768	6.03655	-3.56895	0.00301332	0.0438061	-1.91322
Hook3	-0.24592	4.54417	-4.52218	0.00046015	0.0165552	0.0667517
Tyk2	-0.246345	4.49552	-3.47434	0.00364164	0.0485921	-1.92637
Ahdc1	-0.246675	6.10441	-3.84679	0.00173104	0.0333	-1.37334
Afdn	-0.246832	6.66025	-4.71364	0.000318645	0.0140869	0.282556
Zfp398	-0.247472	4.25884	-4.00649	0.00126117	0.0274342	-0.874802
Tnrc6a	-0.247509	6.96833	-5.34144	9.85159e-05	0.00819944	1.44791
Nckap5l	-0.247921	5.14201	-4.67574	0.000342572	0.0144777	0.295766
Dhx34	-0.247995	3.86829	-4.72769	0.000310218	0.0140183	0.503695
Sez6	-0.248524	7.16279	-3.84376	0.00174149	0.0334222	-1.40328
Plxnb1	-0.248642	7.72876	-4.94822	0.000204315	0.0115328	0.725935
Ankrd52	-0.248744	5.87054	-4.06765	0.00111766	0.0257502	-0.928466
Ppfia2	-0.249351	5.70835	-3.50784	0.0034054	0.0466705	-2.00867
Sh3pxd2b	-0.249483	4.73256	-3.50106	0.00345191	0.0470787	-1.90923
Cdk5rap2	-0.249524	5.36991	-4.71968	0.000314991	0.0140779	0.358764
Zfp362	-0.249721	4.34879	-5.05276	0.000167971	0.0102243	1.05885
Hip1	-0.250114	6.65084	-4.1025	0.00104346	0.0249589	-0.893834
Nup214_1	-0.250169	5.5658	-4.63703	0.000368935	0.0151096	0.187442
Lrig2	-0.25217	5.54889	-4.24687	0.000785847	0.021901	-0.556999
Foxj2	-0.252616	5.32003	-4.16936	0.000914852	0.0234285	-0.685947
Srrm2	-0.252932	9.39537	-4.59278	0.000401642	0.0153697	0.0883304
Tbc1d16	-0.253461	4.72328	-4.27106	0.000749521	0.0216363	-0.427041
Zc3h11a	-0.254066	6.36939	-3.8221	0.00181815	0.0341881	-1.43371
Pknox2	-0.254605	4.92741	-3.83831	0.00176049	0.0335724	-1.2827
Celf2	-0.254914	6.69669	-4.89329	0.000226588	0.0122395	0.621045
Prdm11	-0.256228	4.78234	-4.65897	0.000353747	0.0147487	0.298549
Prdm10	-0.256286	3.69922	-3.72187	0.00222	0.0375093	-1.34476
Nrxn3	-0.256493	7.51721	-3.46174	0.00373474	0.0494119	-2.14936
Nup160	-0.257232	4.08275	-3.71331	0.00225825	0.0378247	-1.40994
Brd4	-0.257777	6.96932	-6.07523	2.6695e-05	0.00431164	2.7472
Adgrl1	-0.260769	7.90507	-4.50253	0.00047794	0.0168394	-0.116374
Cntnap2	-0.260961	7.27677	-3.84999	0.00172007	0.033128	-1.39049
Spag5	-0.261776	4.50181	-4.22419	0.000821542	0.0221152	-0.490441
Astn1	-0.262476	7.86727	-3.68252	0.00240138	0.0388628	-1.7119
Plcb1	-0.262651	6.33486	-3.87389	0.00164029	0.0321998	-1.33101
Fryl	-0.262671	7.11654	-3.79986	0.00190044	0.0349908	-1.48939
Dagla	-0.263864	5.93566	-4.45841	0.000520517	0.0173309	-0.177596
Atrn	-0.264863	9.29984	-5.33644	9.94215e-05	0.00823281	1.46893
Mycbp2_1	-0.265015	8.13532	-4.99419	0.000187422	0.0108805	0.817092
Zcchc8	-0.265103	4.70775	-3.82745	0.00179891	0.0339649	-1.27558
Lmtk3	-0.265178	6.89117	-3.54527	0.00315953	0.0446293	-1.98802
Herc1	-0.265737	7.99154	-4.17003	0.000913644	0.0234285	-0.757166
Lrch3	-0.26619	6.02384	-5.47578	7.71437e-05	0.0072084	1.71128
Lcor	-0.266601	4.17461	-3.59242	0.00287511	0.0429109	-1.65306
Dennd5b	-0.267015	5.30327	-4.22614	0.000818412	0.0221152	-0.574842
Dip2b	-0.267857	6.85393	-3.99794	0.00128269	0.0277789	-1.10072
Bptf	-0.267863	6.95565	-4.87687	0.000233722	0.0122991	0.587926
Cad	-0.268268	5.04856	-4.0497	0.00115797	0.0260911	-0.88838
Efna5	-0.269152	5.40938	-3.55216	0.00311624	0.0444798	-1.89371
Phc3	-0.269654	6.93498	-5.86616	3.84347e-05	0.00497607	2.38496
Dock4	-0.269795	6.22627	-3.70038	0.00231727	0.038222	-1.66599
Erich3	-0.269892	6.00008	-3.6012	0.00282508	0.0425536	-1.84769
Plxna3	-0.270147	5.72013	-3.5844	0.0029216	0.0433274	-1.86004
Urb2	-0.270883	3.24666	-3.80373	0.00188588	0.0349075	-1.14701
Mpp2	-0.270969	6.77461	-4.75496	0.000294511	0.0137027	0.359317
Zfp319	-0.272432	3.68203	-4.55752	0.000429841	0.0160091	0.20628
Mdm4	-0.272489	6.94935	-4.1429	0.000963681	0.023742	-0.818597
Bahcc1	-0.273487	4.88425	-3.80074	0.00189713	0.0349694	-1.34984
Speg	-0.273607	6.14184	-4.54934	0.000436664	0.0160252	-0.0142556
Ssh2	-0.273723	5.79308	-5.34614	9.76728e-05	0.00819944	1.48803
Akap13	-0.274475	5.84869	-3.76474	0.00203815	0.0361394	-1.51754
Ep400	-0.274903	7.00238	-4.86584	0.000238644	0.0123483	0.567035
Apc2	-0.275	7.86707	-4.10786	0.0010325	0.0248059	-0.880018
Dlg5	-0.275089	5.94823	-5.88048	3.74797e-05	0.00493103	2.42989
Lyst	-0.275265	5.84341	-4.60766	0.000390323	0.0151526	0.112851
Slf2	-0.275408	5.67732	-3.92768	0.0014742	0.0303643	-1.18633
Zfp532	-0.275661	5.86684	-5.75412	4.68425e-05	0.00544562	2.21229
Gan	-0.27594	4.82988	-4.6977	0.000328491	0.0143664	0.366396
LOC690035	-0.276205	3.9909	-3.94965	0.00141135	0.0295065	-0.949803
Nsd1	-0.276224	7.49394	-5.79329	4.37038e-05	0.00525927	2.25857
Pcdhga10	-0.276786	3.6912	-4.20907	0.000846253	0.022594	-0.433564
Pou2f1	-0.276866	4.14569	-4.48942	0.000490205	0.0170113	0.045503
Caskin2	-0.277268	5.84238	-5.11272	0.000150218	0.00970521	1.05891
Tanc2	-0.277378	7.37302	-4.23877	0.000798418	0.0219639	-0.631253
Pom121	-0.277438	6.48143	-5.11866	0.000148568	0.00970521	1.0452
Gse1	-0.27791	6.24571	-4.62356	0.000378592	0.0151096	0.122977
Huwe1	-0.278631	8.62029	-5.23376	0.000120058	0.00898398	1.26819
Brwd1	-0.278942	5.88518	-4.8654	0.000238845	0.0123483	0.596921
Mga	-0.279517	6.04905	-4.19148	0.000875959	0.0230485	-0.698619
Erbb4	-0.279527	4.93846	-3.63051	0.00266432	0.0412755	-1.68634
RGD1560470	-0.279654	6.10106	-3.80276	0.00188949	0.0349075	-1.45909
Cntn4	-0.280141	5.6759	-3.72161	0.00222118	0.0375093	-1.58818
Ago3	-0.280207	5.89875	-4.12452	0.000999174	0.0242914	-0.819637
Cep85l	-0.280218	3.74875	-4.12833	0.000991717	0.0241948	-0.588643
Szt2	-0.281245	5.72333	-4.92214	0.000214594	0.0118266	0.71255
Pcdh15	-0.282642	3.13472	-3.647	0.00257795	0.0404366	-1.42702
Hnrnph3	-0.283708	3.13029	-3.5224	0.00330753	0.0458907	-1.65634
Ash1l	-0.283751	7.51177	-6.68431	9.55463e-06	0.00277395	3.7676
Helz	-0.283808	5.58352	-3.73548	0.00216057	0.0371664	-1.55305
Zfp169	-0.283937	3.13956	-3.51169	0.00337919	0.0465187	-1.67693
Med13	-0.284619	5.62019	-4.70745	0.000322431	0.0142157	0.31674
Slc20a2	-0.285348	7.48207	-3.6849	0.00239002	0.0387559	-1.71232
Cttnbp2	-0.286501	6.00913	-4.73769	0.000304356	0.0139649	0.350137
Serinc5	-0.286764	8.06861	-4.22863	0.000814434	0.0221063	-0.642105
Arntl	-0.287136	4.57122	-4.45276	0.00052625	0.0173718	-0.0661346
Ifrd2	-0.287765	2.70949	-3.5789	0.00295396	0.0434797	-1.52271
RGD1310951	-0.28792	5.10313	-5.06422	0.000164417	0.0101039	1.02028
Znrf3	-0.289102	3.13674	-3.46875	0.00368266	0.049001	-1.75588
Zmiz1	-0.289349	7.50559	-5.12323	0.000147311	0.00970521	1.04932
Tnfrsf19	-0.289847	4.1135	-3.66823	0.00247091	0.0392482	-1.49975
Trio	-0.290221	7.01059	-5.75315	4.69228e-05	0.00544562	2.18627
Unc80	-0.29071	8.18314	-3.96897	0.00135836	0.0287779	-1.14546
Psme4	-0.291063	6.60285	-4.05448	0.00114709	0.0259895	-0.986298
Rai1	-0.292454	6.2725	-5.54856	6.76402e-05	0.00685351	1.83326
Cyp2j3	-0.292849	5.12445	-3.62335	0.00270268	0.0416287	-1.72316
Unc13a	-0.29426	6.25073	-4.34393	0.000650158	0.0196772	-0.413261
Hcn1	-0.294593	5.34689	-3.63278	0.00265225	0.0411276	-1.72996
Nav3	-0.294635	5.33839	-5.14345	0.000141882	0.00952478	1.14747
Ksr2	-0.29545	5.08376	-3.53962	0.00319549	0.0448993	-1.88083
Tnr	-0.295664	6.72495	-4.44486	0.000534368	0.0175395	-0.231893
Dpy19l3	-0.295743	7.34446	-3.99359	0.00129375	0.0278429	-1.10893
Lmf2	-0.296551	5.1853	-4.94184	0.000206783	0.0115919	0.788432
Kmt2b	-0.296752	5.80907	-5.47638	7.70598e-05	0.0072084	1.72211
Pan3	-0.296872	5.51825	-5.26039	0.000114312	0.00879576	1.34848
Ncam1	-0.29728	9.55378	-4.75883	0.00029235	0.0136882	0.406745
Zfp236	-0.297688	4.61172	-4.87944	0.000232589	0.0122964	0.723107
Baz2b	-0.297999	6.04499	-4.61833	0.000382408	0.0151096	0.122044
Ccnt2	-0.298849	6.30478	-3.61833	0.00272999	0.0418555	-1.83015
Dnmt3a	-0.29898	6.30756	-7.28955	3.61825e-06	0.00174473	4.72917
Tspoap1	-0.299495	6.82319	-3.49478	0.00351343	0.0474851	-2.08955
Chd7	-0.300024	5.31376	-4.22968	0.000812749	0.0221063	-0.568797
Arid1a	-0.301434	7.2968	-6.12545	2.44792e-05	0.00426836	2.83371
C2cd3	-0.301557	5.16896	-3.88869	0.00159276	0.0316862	-1.21296
Srcap	-0.302134	6.94717	-6.27389	1.89864e-05	0.00386799	3.0858
Bcorl1	-0.302548	4.7042	-5.64064	5.73349e-05	0.00619407	2.0766
Neo1	-0.302831	7.40158	-6.02602	2.90702e-05	0.0045164	2.6634
Nktr	-0.303519	6.69454	-3.67735	0.00242906	0.039172	-1.72707
Mlxip	-0.303886	4.73078	-3.78788	0.00194632	0.0355945	-1.35463
Ino80d	-0.304269	5.23021	-4.09913	0.00105041	0.0249785	-0.812152
Nectin1	-0.304381	6.16724	-4.36311	0.000626323	0.0193508	-0.372644
Adam19	-0.304855	4.78211	-3.96167	0.00137815	0.0290463	-1.0262
N4bp1	-0.306303	5.73196	-4.35501	0.000636276	0.0194739	-0.362688
Cdh22	-0.307891	4.62934	-4.24455	0.00078942	0.021901	-0.466288
Zfp462	-0.308739	6.02703	-4.46743	0.000511508	0.0172758	-0.165135
Dync2h1	-0.309869	5.73363	-3.52233	0.00331409	0.0458937	-1.98332
Pkd1	-0.309901	7.39088	-5.45996	7.93878e-05	0.00731267	1.66393
Tmem201	-0.310186	4.57064	-4.21482	0.000836766	0.0224509	-0.515934
Cacna1h	-0.310692	5.46383	-4.05985	0.00113498	0.0258969	-0.91078
Wscd2	-0.310752	4.62854	-3.47803	0.00361484	0.0484941	-1.9382
Camk2a	-0.310884	6.14631	-3.57005	0.0030228	0.043832	-1.92061
Pcdh17	-0.310912	6.92441	-3.91611	0.00150839	0.030763	-1.26109
Zbtb40	-0.31119	4.94083	-3.539	0.00319943	0.0449159	-1.86368
Ptprd	-0.311422	8.34553	-4.13639	0.000976108	0.0239447	-0.815815
Cacna2d2	-0.312499	7.25477	-3.55375	0.00313786	0.0446293	-1.97819
LOC108352957	-0.312749	4.0973	-3.90166	0.00155227	0.0312234	-1.05342
Gltscr1	-0.313171	4.84467	-4.91156	0.000218915	0.0120046	0.761689
Tnks	-0.313928	6.40284	-5.07012	0.000162617	0.0101039	0.957509
Fry	-0.31472	7.57476	-5.424	8.47443e-05	0.00754379	1.60028
Slc6a6	-0.31502	6.70485	-4.23182	0.000809351	0.0221031	-0.643107
Clstn2	-0.315508	7.79992	-3.98778	0.00130872	0.0280911	-1.11516
Celsr2	-0.315587	7.71607	-4.75794	0.000292846	0.0136882	0.36784
Sorl1	-0.315642	8.00376	-5.88641	3.70917e-05	0.00493103	2.42607
Ttc28	-0.316269	5.12629	-5.16494	0.000136341	0.00946438	1.20247
Ptprz1	-0.316521	8.41312	-4.50405	0.000476538	0.0168263	-0.10452
Kdm6b	-0.31735	5.83268	-4.02305	0.00122054	0.02687	-1.01214
Lgr6	-0.318142	4.27269	-3.45171	0.00381056	0.0499291	-1.93592
Klf9	-0.318374	6.06633	-4.14372	0.000962128	0.023742	-0.791999
Tjap1	-0.318853	5.15762	-4.04403	0.001171	0.0262759	-0.910833
Rev3l	-0.319387	6.07701	-4.80332	0.000268647	0.0130819	0.470797
Scarb1	-0.32006	4.85273	-4.35669	0.000634192	0.019464	-0.278108
Epas1	-0.320104	7.67797	-5.57108	6.49538e-05	0.00676386	1.86585
Herc2	-0.320116	8.47119	-5.89624	3.64574e-05	0.00491511	2.44906
Shank1	-0.320256	8.02347	-5.05001	0.000168835	0.0102387	0.919367
Snrnp48	-0.320628	4.38857	-3.57101	0.00300093	0.0437481	-1.72447
Hivep3	-0.322453	5.25918	-5.11254	0.000150266	0.00970521	1.09689
Ncoa6	-0.322995	5.80822	-4.90468	0.000221773	0.0120593	0.675055
Taf1c	-0.323741	3.35557	-3.56016	0.00306678	0.0441414	-1.60843
Spry3	-0.323766	2.75103	-3.67638	0.00243103	0.039172	-1.34824
Slc4a8	-0.325112	6.36009	-4.25176	0.000778356	0.0218167	-0.595463
Slc39a10	-0.32552	6.84457	-5.60107	6.15462e-05	0.00658448	1.91709
Itga6	-0.326326	6.46467	-5.93807	3.38831e-05	0.00472905	2.51557
Gpr63	-0.326644	3.72036	-4.54202	0.000442871	0.0161623	0.175947
Ep300	-0.326674	6.41688	-6.34089	1.69462e-05	0.00363761	3.20385
Mxra7	-0.326902	5.57876	-3.93979	0.00143921	0.0299081	-1.15409
Dlgap2	-0.32773	3.17182	-3.45212	0.00380741	0.0499278	-1.7899
Mical3	-0.328654	6.09989	-6.82836	7.54936e-06	0.00246305	4.00876
Tet2	-0.329687	5.14805	-4.40371	0.000578784	0.0183223	-0.219157
Cacna1g	-0.330117	6.84989	-5.21953	0.00012325	0.00909763	1.22573
Tra2a	-0.330855	6.56864	-3.95217	0.00141265	0.0295065	-1.1893
RGD1310081_1	-0.330933	4.31368	-4.15855	0.000934491	0.0235873	-0.592384
Zfp618	-0.33122	3.98644	-3.95334	0.00140108	0.0294155	-0.941986
Smg1	-0.331621	7.45486	-4.49121	0.000488516	0.0170113	-0.143253
Ak1	-0.332822	5.7869	-5.52402	7.0701e-05	0.00691058	1.80862
LOC100359816	-0.33327	5.62727	-4.68728	0.000335094	0.0144084	0.278494
Ipcef1	-0.333277	4.08016	-3.54042	0.00319038	0.0448661	-1.73823
Prr12	-0.33372	6.15567	-5.93852	3.38561e-05	0.00472905	2.52388
LOC102549542	-0.334164	3.21675	-3.5468	0.00314985	0.0446293	-1.61921
Med13l	-0.335309	5.92085	-7.04756	5.3035e-06	0.0021629	4.35919
Acacb	-0.335328	4.61514	-4.43228	0.000547558	0.0177659	-0.10906
Med12	-0.335498	5.62648	-5.03624	0.000173236	0.010428	0.930876
Ubn2	-0.335668	5.99788	-5.5796	6.39659e-05	0.00673703	1.89847
Zbtb42	-0.33613	3.91408	-3.48299	0.00357914	0.0482134	-1.82357
Lcor_1	-0.336684	3.56167	-3.87688	0.00163055	0.0320858	-1.0391
Map3k13	-0.337913	4.72287	-4.38457	0.000600713	0.0188451	-0.210919
Kif17	-0.337996	3.25683	-4.63527	0.00037018	0.0151096	0.360599
Dst	-0.33876	10.1306	-6.07602	2.66582e-05	0.00431164	2.78474
Pitpnm3	-0.339337	5.977	-4.9544	0.000201955	0.0114791	0.758845
Acvr2b	-0.339525	4.56385	-4.20667	0.000850257	0.0226222	-0.530418
Pitpnm2	-0.341203	6.94998	-4.62952	0.000374284	0.0151096	0.119852
Utp20	-0.341724	4.90689	-6.13697	2.39984e-05	0.00426836	2.91293
NEWGENE_1305560	-0.345487	4.16325	-4.61002	0.000388557	0.0151526	0.26723
RGD1307100	-0.345927	8.13714	-5.78729	4.41695e-05	0.00525939	2.25413
Zc3h12c	-0.346612	4.22566	-4.05522	0.00114541	0.0259877	-0.777588
Zic4	-0.346836	4.21715	-3.67558	0.00243491	0.039172	-1.4996
Chd9	-0.34771	6.53009	-5.92474	3.46823e-05	0.00472905	2.49132
Tnrc18	-0.348491	6.67805	-4.0743	0.00111117	0.0257412	-0.954214
Slc2a1	-0.348832	6.81686	-7.3745	3.16954e-06	0.00172349	4.85606
Tmem2	-0.349	4.11594	-4.32054	0.000680488	0.020294	-0.265735
RGD1310081	-0.349577	5.22853	-4.80914	0.000265693	0.0130288	0.538676
Gpr17	-0.349991	5.73588	-4.33288	0.000664307	0.0199942	-0.405194
Drp2	-0.350663	6.1721	-5.02922	0.000175524	0.0104884	0.889446
Atp8a1	-0.351	8.40531	-5.01147	0.000181451	0.0106475	0.853935
LOC108349703	-0.351645	1.86797	-3.58393	0.00292436	0.0433289	-1.49125
Zfp704	-0.352007	5.1219	-5.54993	6.7473e-05	0.00685351	1.89316
Dscaml1	-0.352036	5.04696	-4.98821	0.000189535	0.0108869	0.885746
Egfr	-0.352413	5.23934	-4.5281	0.00045492	0.0164184	0.00884316
Grin2d	-0.353611	5.08432	-3.82751	0.00179871	0.0339649	-1.32151
Ankhd1	-0.353896	5.87207	-4.08547	0.00108064	0.0254014	-0.894234
Sh3rf3	-0.354068	3.23858	-3.78102	0.0019731	0.0358033	-1.18811
Ablim3	-0.354359	4.93705	-3.77506	0.00199666	0.0359815	-1.40537
Ago2	-0.354464	4.43015	-4.15295	0.000944838	0.0235978	-0.616589
Cdh4	-0.354714	4.795	-3.72297	0.00221516	0.0374854	-1.48794
Lamc1	-0.355359	6.24005	-3.99875	0.00129332	0.0278429	-1.08974
Sel1l3	-0.357182	6.31041	-3.7071	0.00236017	0.0385061	-1.67809
Skp2	-0.357696	2.52855	-3.72362	0.00221228	0.0374854	-1.25437
Ptchd4	-0.357711	2.10388	-3.72905	0.00218846	0.0371895	-1.23792
Lrrc8c	-0.357869	5.00822	-4.57263	0.000417514	0.0156572	0.115038
Kcnj6	-0.36013	6.31362	-3.76833	0.00208809	0.0366012	-1.5582
Epha8	-0.36296	3.18153	-3.67305	0.00244721	0.0392025	-1.38268
Zfp142	-0.363317	5.71056	-6.92983	6.4059e-06	0.00229352	4.17819
LOC103690074	-0.365328	2.89141	-3.75133	0.00209335	0.0366012	-1.21933
Phf21b	-0.366456	2.81908	-3.81014	0.00186195	0.0345592	-1.10905
Kcnn3	-0.366643	4.6402	-5.8672	3.83646e-05	0.00497607	2.46868
Zfp280c	-0.366931	3.86706	-3.64956	0.00256481	0.0403053	-1.50147
Zbtb16	-0.367023	4.52445	-3.50549	0.00342144	0.0467846	-1.86961
Shank3	-0.367582	6.03911	-6.68792	9.49804e-06	0.00277395	3.7839
Arfgef3	-0.367615	6.51877	-4.4856	0.00049384	0.0170113	-0.149137
Pde2a	-0.36803	5.81311	-4.1611	0.000936955	0.0235873	-0.74799
Prrc2c	-0.36863	7.03969	-5.97274	3.18931e-05	0.00472905	2.57046
Shisa7	-0.370089	4.95808	-3.51439	0.00339571	0.0466281	-1.91991
Trim47	-0.370851	2.87763	-3.83337	0.00177785	0.0337626	-1.06955
Cacna1a	-0.371355	7.00073	-5.37247	9.30855e-05	0.00799213	1.50462
Wdfy3	-0.373078	8.25988	-6.77538	8.22988e-06	0.00261064	3.91998
Gdpd2	-0.373127	5.2477	-4.95148	0.000203067	0.0115022	0.80173
Lama4	-0.374094	4.3625	-3.45438	0.00379022	0.0497424	-1.94372
Ptprt	-0.374228	8.57754	-4.31091	0.000699154	0.0206618	-0.478581
Cacna1c	-0.374285	5.60293	-4.2257	0.000819361	0.0221152	-0.601631
Zcchc14	-0.374657	4.97487	-6.57944	1.13623e-05	0.00289614	3.63595
Unc79	-0.374783	5.75587	-5.45407	8.02408e-05	0.00731267	1.68516
Phip	-0.375506	5.87138	-5.96844	3.2133e-05	0.00472905	2.58551
Plxna4	-0.3767	6.773	-3.58569	0.0030712	0.0441414	-1.94263
Spata2L	-0.37687	3.00065	-3.81261	0.00185283	0.0345474	-1.11371
Syne1	-0.377156	8.08943	-6.02747	2.89973e-05	0.0045164	2.6715
Pcdh10	-0.377598	6.69393	-4.6937	0.000331007	0.0143732	0.244698
Tet3	-0.380916	5.14962	-6.10447	2.53804e-05	0.00426836	2.84879
Arhgap33	-0.381535	4.98423	-3.74741	0.00212249	0.036855	-1.46872
Grin2b	-0.384102	5.77522	-4.76013	0.000291628	0.0136882	0.406328
RGD1306271	-0.38421	4.83364	-6.11307	2.50068e-05	0.00426836	2.87572
Asxl2	-0.385059	5.37998	-4.49803	0.000482112	0.016877	-0.0605625
Notch1	-0.385216	6.0719	-6.59054	1.11549e-05	0.0028884	3.62464
Pcdh1	-0.385371	5.40367	-4.45507	0.000523899	0.0173707	-0.144451
P2rx7	-0.386174	4.08189	-3.9643	0.001371	0.0289328	-0.932224
Cacna1e	-0.386994	7.14177	-3.73959	0.0022584	0.0378247	-1.64371
Kmt2c_1	-0.38702	6.77162	-5.82091	4.1623e-05	0.00514989	2.30701
Zbed6	-0.387462	6.08254	-3.86159	0.00174947	0.0335361	-1.37078
Enc1	-0.38792	5.89673	-3.82969	0.00186217	0.0345592	-1.42065
Ints6l	-0.388195	4.24449	-3.48214	0.0035852	0.0482552	-1.87287
Kcnk9	-0.388567	5.9571	-4.37056	0.000622588	0.0192719	-0.353215
Grm5	-0.389776	5.35474	-4.07779	0.00110356	0.0256811	-0.870441
Pcdh19	-0.390098	5.47225	-6.11242	2.50346e-05	0.00426836	2.84826
Dcc	-0.390304	4.85006	-4.7514	0.000296516	0.0137027	0.465306
Birc6	-0.390866	7.48214	-7.91514	1.39445e-06	0.00133879	5.66147
Kmt5c	-0.390944	4.63583	-4.0806	0.00108947	0.025506	-0.779005
Hectd4	-0.391395	8.17022	-6.60599	1.08729e-05	0.00286081	3.64412
Cspg4	-0.391668	4.53831	-4.78499	0.000278159	0.0133965	0.556555
Mycn	-0.391916	1.54969	-3.59937	0.00283545	0.0426704	-1.46419
Lnx2	-0.392165	3.47811	-3.73164	0.00217716	0.0371664	-1.30143
Plec	-0.392451	8.10577	-6.39062	1.55813e-05	0.0036311	3.28753
Setbp1	-0.393145	4.33933	-4.15082	0.000948802	0.0236302	-0.609528
Sdk1	-0.394257	4.54614	-5.2644	0.000113471	0.00879576	1.42491
Ccnjl	-0.395582	2.80565	-3.90324	0.00154742	0.031175	-0.940215
Ubr4	-0.395794	8.53503	-7.66764	2.02142e-06	0.00143372	5.30071
Dchs1	-0.397924	5.93365	-6.26219	1.93683e-05	0.00386799	3.08377
Rcor2	-0.39867	-0.052834	-3.77148	0.00201094	0.0359815	-1.22399
RGD1560289	-0.399235	4.713	-4.22661	0.000817652	0.0221152	-0.509346
Lrp1	-0.399442	9.97947	-6.61559	1.07016e-05	0.00286081	3.67904
Chst3	-0.399845	3.99264	-3.60946	0.00277878	0.0423252	-1.59403
Plxna1	-0.399863	6.31441	-6.95875	6.11441e-06	0.00229352	4.21311
Cacna1d	-0.400414	5.94836	-4.61102	0.000391053	0.0151526	0.107499
Zbtb37	-0.401634	1.84687	-3.93759	0.00144549	0.0299498	-0.876229
Csmd3	-0.402334	4.37734	-5.09293	0.000155852	0.00990002	1.12972
Adamts9	-0.403451	3.56544	-3.85062	0.00171789	0.033128	-1.08819
Cdon	-0.403978	5.01168	-4.25407	0.000774857	0.0218167	-0.490295
Wdhd1	-0.404029	2.92725	-4.63293	0.000371845	0.0151096	0.354874
Col5a3	-0.404322	5.46853	-5.28158	0.000109943	0.00874674	1.39078
Arhgap31	-0.404583	4.58013	-4.27531	0.00074333	0.0214999	-0.401388
Celsr3	-0.406885	5.99589	-4.85224	0.000244863	0.0124827	0.567241
Vps13c	-0.407422	7.09627	-6.23764	2.01963e-05	0.00392217	3.02447
Tmem265	-0.407831	1.91793	-4.55218	0.00043428	0.0160252	0.169291
LOC691387	-0.409801	3.73426	-4.65329	0.000357615	0.0148065	0.377261
Nid1	-0.411036	6.55874	-3.80449	0.00201508	0.0359815	-1.52107
Raph1	-0.411142	5.24663	-5.79145	4.3846e-05	0.00525927	2.30892
Map3k2	-0.411159	2.70306	-4.99208	0.000188164	0.0108848	0.956843
Gpr75	-0.412714	4.26074	-5.09223	0.000156055	0.00990002	1.13614
Pik3c2b	-0.412933	5.83941	-5.07243	0.000161918	0.0101039	0.985533
Ralgps1	-0.413388	5.50425	-7.23728	3.92725e-06	0.00183043	4.65909
Nbeal1	-0.414349	4.48097	-4.14999	0.000950337	0.0236324	-0.627692
Itpr3	-0.417092	3.3604	-4.01392	0.00124278	0.0272128	-0.767685
Fstl4	-0.419271	2.96613	-3.62757	0.00268001	0.0414312	-1.44974
Atp10a	-0.419301	3.70484	-3.52993	0.00325806	0.0454263	-1.70578
Nav1	-0.419703	7.25947	-7.8029	1.64861e-06	0.00134469	5.49745
Trrap	-0.419809	7.44925	-6.51071	1.27389e-05	0.00314863	3.48257
Pgap1	-0.420589	4.72419	-3.47615	0.00374328	0.0494481	-1.97512
Piezo1	-0.423041	3.54703	-3.77215	0.00200827	0.0359815	-1.23275
Tex43	-0.425299	-0.0691454	-3.69253	0.00235389	0.0385061	-1.35143
Shisa6	-0.426556	5.64594	-4.73938	0.000306469	0.0139649	0.368249
Srrm4	-0.427454	4.1275	-4.03409	0.00119421	0.0265051	-0.805261
Tet1	-0.427516	3.12723	-4.19912	0.000862935	0.0228523	-0.417039
Macf1	-0.431584	9.60017	-6.67119	9.76316e-06	0.00277395	3.76504
Ly75	-0.43197	2.94244	-3.81271	0.00185245	0.0345474	-1.11025
Slc8a2	-0.434315	5.017	-4.1357	0.000992235	0.0241948	-0.72869
Ets1	-0.436478	4.20478	-4.69326	0.00033129	0.0143732	0.417301
Srgn	-0.439202	3.67536	-4.80862	0.00026596	0.0130288	0.65898
Agrn	-0.441099	7.09813	-6.36743	1.62027e-05	0.00363761	3.24321
Aloxe3	-0.442391	2.97118	-3.82515	0.00180716	0.0340732	-1.08911
F8	-0.445107	4.22538	-5.56178	6.60487e-05	0.00681932	1.96132
Myo10	-0.445177	6.35469	-8.60654	5.14071e-07	0.000751082	6.6315
Bsn	-0.445415	7.09706	-5.19589	0.00013033	0.00929215	1.17192
Adamts20	-0.446403	3.64842	-4.73197	0.000307694	0.0139816	0.523015
Arap3	-0.447292	3.6601	-5.09044	0.000156575	0.00990002	1.15657
Spen	-0.448028	6.27206	-6.85546	7.22437e-06	0.00240513	4.04942
Fanci	-0.448251	1.39662	-3.7615	0.00205137	0.036295	-1.18724
Zfhx3	-0.450123	5.88474	-4.77788	0.000289928	0.0136882	0.411919
Ikbke	-0.453024	2.89545	-3.97078	0.00135352	0.0287499	-0.821396
LOC100362819	-0.453062	5.2616	-6.48075	1.33928e-05	0.00326085	3.46904
Alk	-0.453131	4.87649	-4.38325	0.000607439	0.0189468	-0.235448
Ryr2	-0.454857	7.32783	-5.75008	4.71785e-05	0.00544562	2.18174
Adgre5	-0.455333	3.29921	-4.25085	0.000779747	0.0218182	-0.330437
Klhl41	-0.456097	0.232087	-3.47742	0.00361924	0.0485133	-1.69197
Als2cl	-0.456474	3.97986	-3.78257	0.00196701	0.0358022	-1.26329
Igsf9b	-0.457666	4.29557	-5.20136	0.000127457	0.00924092	1.32869
Cacna1b	-0.457901	6.55021	-4.39736	0.000630562	0.0194082	-0.374505
Pclo	-0.45979	7.05098	-5.57266	6.5097e-05	0.00676386	1.86174
Cyp2j4	-0.460691	1.53356	-3.54408	0.00316705	0.0446534	-1.55983
Dot1l	-0.460932	5.79115	-6.0873	2.61437e-05	0.00431164	2.79282
LOC102553088	-0.46155	2.28559	-3.5223	0.00330818	0.0458907	-1.60699
LOC103694424	-0.463105	1.76296	-3.47413	0.00364317	0.0485921	-1.68235
Akr1cl	-0.463598	2.60529	-4.18032	0.000895359	0.023221	-0.442553
Kank3	-0.463772	2.63936	-4.69538	0.000329947	0.0143732	0.452434
Prp2l1	-0.468811	5.30935	-5.96307	3.24355e-05	0.00472905	2.60174
Ankdd1a	-0.472884	2.21273	-4.1226	0.00100296	0.0243472	-0.548623
RGD1562037	-0.473239	6.37751	-4.12581	0.00110854	0.0257412	-0.917739
Soga1	-0.473277	5.24774	-7.83945	1.56086e-06	0.00134013	5.54881
Oprm1	-0.476566	3.702	-4.76179	0.000290706	0.0136882	0.574319
Stard9	-0.476682	5.01897	-5.25785	0.000114847	0.00879576	1.37989
Ptpro	-0.477227	5.12593	-4.48227	0.00051337	0.0173029	-0.0909026
Lgals9	-0.477563	3.59595	-3.58309	0.00292986	0.0433316	-1.592
Dync1h1	-0.478695	9.73278	-7.67593	1.9962e-06	0.00143372	5.31533
Mdn1	-0.480125	6.4384	-5.94398	3.35347e-05	0.00472905	2.52699
Asxl3	-0.480473	3.42566	-5.01149	0.000181447	0.0106475	1.01983
Rnf144b	-0.482378	4.06368	-5.72672	4.91766e-05	0.00551058	2.24431
Plagl1	-0.483284	4.37053	-3.50002	0.00361262	0.0484941	-1.88532
Ildr2	-0.485469	5.04169	-4.1833	0.000938495	0.0235896	-0.667468
Mas1l	-0.488565	1.67092	-4.00984	0.00125285	0.0273597	-0.756317
Slc7a1	-0.488737	5.75927	-6.32714	1.73452e-05	0.00363761	3.19874
Zfhx2	-0.489857	4.89927	-6.43423	1.44791e-05	0.00347349	3.40319
Akr1b10	-0.491025	2.44883	-3.74411	0.00212369	0.036855	-1.21567
LOC102547266	-0.496863	1.71943	-4.28743	0.000725928	0.0211089	-0.284024
Ccm2l	-0.499862	1.23439	-4.06122	0.00113193	0.0258969	-0.685446
Ngfr	-0.501424	3.41766	-4.26738	0.000754943	0.0216773	-0.306348
LOC102553825	-0.50165	3.96798	-5.28063	0.000110136	0.00874674	1.48222
Pag1	-0.504876	2.10856	-4.23501	0.000804312	0.0220517	-0.357214
LOC108351685	-0.51016	0.571363	-4.40211	0.000580587	0.0183223	-0.174573
Rasip1	-0.510241	3.44725	-7.41806	2.96254e-06	0.00172349	4.74187
Ryr3	-0.510856	5.3254	-5.73872	4.81394e-05	0.00545743	2.21348
Tmem44	-0.518411	2.9467	-4.19571	0.000868728	0.0229313	-0.41795
Nos3	-0.519354	2.79048	-4.88428	0.000230474	0.0122964	0.781187
Ddx11	-0.519905	3.1741	-4.20467	0.000853584	0.0226415	-0.408648
Kmt2d	-0.521394	7.46296	-5.97104	3.27105e-05	0.00472905	2.55025
Kcnb2	-0.521588	3.11717	-3.87928	0.0016228	0.0320485	-0.998492
Mgat5b	-0.52284	5.8834	-7.54177	2.44877e-06	0.00159787	5.11571
LOC103692951	-0.527469	1.94062	-3.77422	0.00200002	0.0359815	-1.15874
Tenm2	-0.527933	5.97002	-5.51299	7.57489e-05	0.00718426	1.74162
LOC102554501	-0.529007	1.46531	-4.49816	0.000481991	0.016877	0.0506156
Emp2	-0.529071	2.59369	-4.18073	0.000894643	0.023221	-0.441888
Reln	-0.529109	8.46777	-3.5575	0.00362855	0.0485519	-2.05393
Cbfa2t3	-0.529458	3.86465	-6.9939	5.77889e-06	0.00229352	4.22453
Pcdhgb7	-0.529813	3.32628	-5.47446	7.73291e-05	0.0072084	1.80143
Gimap8	-0.531523	2.12617	-4.56579	0.00042305	0.0158285	0.205182
Lrp2	-0.533494	4.89986	-5.29704	0.000108049	0.0086941	1.45054
LOC103692397	-0.537627	1.45672	-3.63284	0.00265191	0.0411276	-1.40709
Disc1	-0.538456	3.37824	-5.21326	0.000124685	0.00912104	1.3655
Col4a2	-0.53955	5.53507	-4.80809	0.000290869	0.0136882	0.444815
Degs2	-0.543834	1.45277	-3.77478	0.0019978	0.0359815	-1.1635
Flvcr2	-0.548987	1.97497	-4.05785	0.00113947	0.025925	-0.665896
Lrp1b	-0.549068	5.42124	-6.3604	1.63963e-05	0.00363761	3.26627
LOC108351758	-0.550812	0.615398	-3.67168	0.00245391	0.0392025	-1.35923
Tnfsf8	-0.552674	0.316272	-3.86174	0.00168034	0.0328231	-1.05937
Kmt2a	-0.552769	7.29938	-6.52437	1.26836e-05	0.00314863	3.48906
Fat1	-0.552901	7.36736	-10.1401	6.78693e-08	0.000276788	8.57309
Igsf10	-0.554256	3.9275	-3.9679	0.00140608	0.0294825	-0.92933
Nbeal2	-0.556621	4.7129	-7.68364	1.97301e-06	0.00143372	5.30419
LOC100363368	-0.564042	0.977758	-3.94397	0.00142733	0.0297369	-0.892414
Gjc1	-0.564261	1.75881	-6.19594	2.16883e-05	0.00411397	2.65178
Ano5	-0.568367	1.4679	-5.82196	4.15456e-05	0.00514989	2.07544
LOC102547107	-0.569456	0.661282	-3.90543	0.00154072	0.0311061	-0.970672
Csmd2	-0.569714	5.59539	-7.30294	3.54331e-06	0.00174473	4.75844
Csmd1	-0.570143	4.55809	-7.2904	3.61344e-06	0.00174473	4.72481
Sox18	-0.578975	2.05783	-3.54422	0.00316617	0.0446534	-1.56319
Plscr2	-0.579477	1.06446	-3.72049	0.00222616	0.0375371	-1.26441
Slc52a3	-0.582596	1.49277	-3.97647	0.00133835	0.028502	-0.818523
LOC103690962	-0.590206	3.13884	-5.35106	9.67976e-05	0.00818165	1.58467
Eng	-0.595183	4.61144	-3.82811	0.00201528	0.0359815	-1.33908
Tie1	-0.601737	4.35962	-5.92301	3.47873e-05	0.00472905	2.57096
Nostrin	-0.60367	1.79859	-6.33546	1.71027e-05	0.00363761	2.85025
Gpr4	-0.604646	2.30559	-3.57781	0.00296041	0.0434797	-1.50885
LOC103694513	-0.605082	2.12715	-3.64962	0.00256445	0.0403053	-1.37818
Cd34	-0.606558	2.59728	-4.43103	0.000548888	0.0177659	-0.00400157
Abcc9	-0.614159	3.75903	-4.79998	0.000270356	0.0131259	0.640732
C10H5orf58	-0.619665	1.30789	-4.09722	0.00105436	0.0249997	-0.622057
Tenm1_1	-0.619874	3.4879	-3.61145	0.00290047	0.0431402	-1.55764
Adamts15	-0.625348	3.10444	-3.60091	0.0029089	0.0431782	-1.52825
Syne1_1	-0.626786	6.20511	-6.80153	8.32178e-06	0.00261064	3.91858
Fgd5	-0.630806	3.97537	-4.97607	0.000196083	0.0112235	0.936731
RGD1564247	-0.633234	1.78951	-3.54285	0.00317485	0.0446862	-1.56256
Adtrp	-0.635706	0.905115	-4.32549	0.00067395	0.0202166	-0.270431
Cyp2d3	-0.6362	0.19114	-3.5726	0.00299139	0.0436871	-1.53693
Bcl2l15	-0.644486	0.781704	-3.59406	0.00286571	0.0428883	-1.48422
Otof	-0.646089	3.12535	-4.40853	0.000573388	0.0182689	-0.0405593
Slc38a5	-0.648967	1.86437	-3.90925	0.00152906	0.0309859	-0.92485
Podxl	-0.649351	4.8597	-7.54606	2.43275e-06	0.00159787	5.11303
Fat3	-0.651132	5.67022	-9.60475	1.3386e-07	0.000296851	7.89724
LOC102553881	-0.665402	4.54483	-3.92641	0.00171848	0.033128	-1.16745
Cep131	-0.671179	6.05243	-9.72805	1.14188e-07	0.000296851	8.0642
Atp13a5	-0.676595	2.93706	-4.1093	0.00103725	0.0248833	-0.578238
Shroom4	-0.677997	2.22338	-5.2584	0.000114732	0.00879576	1.3433
Nxpe1	-0.679784	1.75778	-4.83292	0.000253983	0.0128671	0.616159
Ushbp1	-0.682257	1.7334	-4.45369	0.000525303	0.0173718	-0.00562785
Sema3g	-0.687008	3.26862	-5.81433	4.21086e-05	0.00516479	2.34823
Dll4	-0.688779	1.29057	-3.552	0.00311724	0.0444798	-1.54738
LOC102550527	-0.691081	3.04155	-3.90705	0.00159189	0.0316862	-0.96896
Fat4	-0.692465	3.96934	-6.07727	2.66009e-05	0.00431164	2.82043
Svep1	-0.694706	2.33764	-5.01849	0.000179083	0.0106232	0.969982
Mmrn2	-0.696012	2.95441	-3.62477	0.00281501	0.0425149	-1.48354
Slc19a3	-0.703542	1.27512	-5.32436	0.000101645	0.00834537	1.32189
Gdf10	-0.703957	4.27114	-4.17193	0.00104659	0.0249785	-0.661472
Cldn5	-0.705115	5.05221	-8.01384	1.20508e-06	0.00133879	5.78765
LOC102551251	-0.706322	3.19976	-3.91469	0.00158889	0.0316862	-0.973659
LOC102552626	-0.707867	0.814244	-5.12635	0.00014646	0.00970521	0.96301
Zfp385c	-0.710421	0.556081	-3.82469	0.00180883	0.0340732	-1.10853
RGD1559731	-0.718716	1.48588	-5.48799	7.54568e-05	0.00718426	1.59478
Esam	-0.724783	3.14775	-7.87915	1.47112e-06	0.00133879	5.24684
Itm2a	-0.725684	5.59786	-8.55525	5.52503e-07	0.000751082	6.55037
Lef1	-0.728233	2.40007	-6.64559	1.01841e-05	0.00277395	3.41402
Tek	-0.728275	4.20102	-6.3434	1.68744e-05	0.00363761	3.25581
Tnfrsf25	-0.741183	0.656487	-4.66236	0.000351455	0.0147487	0.240283
Col7a1	-0.749678	1.46591	-3.55798	0.0030966	0.0443891	-1.53967
Slco1a2	-0.756158	5.58382	-7.25659	4.32469e-06	0.00190672	4.57816
Hmcn1	-0.763458	2.65317	-5.54109	6.85571e-05	0.00686117	1.84156
Car4	-0.76471	2.69527	-5.5142	7.19645e-05	0.00694649	1.80451
Hspa12b	-0.805735	2.47272	-6.15172	2.33974e-05	0.00426836	2.73641
Cxcl12	-0.820554	5.37821	-8.00686	1.3102e-06	0.00133879	5.72374
Col4a1	-0.824359	5.32222	-6.10055	3.38547e-05	0.00472905	2.6014
Angptl4	-0.830026	2.5354	-4.91063	0.000219296	0.0120046	0.808465
LOC100911068	-0.834189	0.838717	-7.39072	3.09075e-06	0.00172349	3.8721
Sox17	-0.835053	2.27476	-6.12353	2.456e-05	0.00426836	2.6579
Rgs5	-0.843582	4.74045	-5.85152	4.93192e-05	0.00551058	2.25456
Erg	-0.85269	2.76146	-7.0637	5.16874e-06	0.0021629	4.07266
Cyyr1	-0.856746	3.97777	-7.05493	5.24155e-06	0.0021629	4.32386
Clic5	-0.871791	3.73839	-9.92356	8.90242e-08	0.00029045	7.80828
Chrnb4	-0.876862	2.48421	-4.42575	0.000580571	0.0183223	-0.051311
LOC689268	-0.885499	3.6434	-4.01587	0.0014863	0.0304215	-0.916963
Cnksr2	-0.90629	4.02569	-6.38662	1.73931e-05	0.00363761	3.22731
Prom1	-0.909282	4.44729	-10.1449	6.74656e-08	0.000276788	8.31902
Abcb1a	-0.9195	4.82377	-8.15736	1.05246e-06	0.00132068	5.90223
Pecam1	-0.927303	3.23486	-6.96139	6.08855e-06	0.00229352	4.05613
Thsd1	-0.946869	2.45373	-7.87636	1.47724e-06	0.00133879	4.98213
Adgrl4	-0.961431	3.27384	-6.93111	6.39269e-06	0.00229352	4.02175
Adgrf5	-1.01099	5.25441	-9.37614	2.10856e-07	0.000382189	7.44088
Egflam	-1.02116	2.92141	-6.86981	7.05823e-06	0.00240513	3.85191
Zfp366	-1.05398	1.57617	-7.1869	4.25141e-06	0.00190672	3.87046
Ptprb	-1.07168	5.30226	-11.2586	1.83532e-08	0.000149698	9.66716
Flt1	-1.23688	5.77117	-12.0626	9.17552e-09	0.00014968	10.3483
Ndufa10l1	-1.24128	3.80656	-4.44691	0.000773786	0.0218167	-0.281221
LOC108349760	-1.37239	0.950305	-6.02926	2.93757e-05	0.00452082	2.24121
